# Supplementary material for: Morphological, Physiological, Biochemical, and Transcriptome Studies Reveal The Importance of Different Component Traits During Salinity Stress in Prunus
Source: Research Square preprint supplement (doi:10.21203/rs.3.rs-659140/v1), 2021-07-07
Supplement: Supplementary file 1 [file 10006a9b82f50beea5f95ec2.xlsx]

## Sheet: Sheet1
Supplementary Table S5. List of primers used for the qRT-PCR analyses
Primer Name	Sequence (5' to 3')
Prupe.7G141400-F	ACCACCAGAGGATTTAACC
Prupe.7G141400-R	CTCTACGAACCGATCCATATT
Prupe.1G570800-F	ATGTTCTTCAAGGTGAGGATG
Prupe.1G570800-R	CACCATGAGACTGATCCAAG
Prupe.6G324100-F	TCAGCCACTGGTTAAAAACTC
Prupe.6G324100-R	GCTATTGCGTTTGCATTCATAG
Prupe.7G255400-F	CAAGACTTGTGGTGTACTA
Prupe.7G255400-R	CAGCTAATTACTCTCATCATC
Prupe.1G292500-F	CCTATCATCAGTCGGTTATACAA
Prupe.1G292500-R	CCAGTCATTGCTTTGCTTTC
Prupe.2G250900-F	GCTATGCCAGGCAAGTAATA
Prupe.2G250900-R	GAGAAAGTCTTGTTCTAATCCAAGG
Prupe.6G121800-F	GAGACTCGCTACATAAACAACA
Prupe.6G121800-R	CTCTCAATTGCAATCACGGA
Prupe.1G350700-F	CTTCCTCTTCATGGACGATTT
Prupe.1G350700-R	TCTTCTCCTCGTCAGTCATAG
Prupe.3G242700-F	CTGGTCATATGGGTTCGAAG
Prupe.3G242700-R	GATGGAATGGTTTGGGAGTAT
Prupe.7G168100-F	TGATTTCTCAGGTAGTATGTGAC
Prupe.7G168100-R	GAGAAATCCAGCAGCAGAG
Prupe.3G178400-F	GAGGAATGAGGCCAAGTTT
Prupe.3G178400-R	AGGCTCTGAACCTCTATCAT
Prupe.5G141200-F	CAAGATCGAGGGAATGTGAG
Prupe.5G141200-R	ACAACCGTACTGCCTTATTC
Prupe.1G080500-F	CATGAGACTGGCTATTTTTGC
Prupe.1G080500-R	CCACGCCCATAGTATTGTT
Prupe.4G147100-F	GTTGACAAGAAGGTATATGAGAGT
Prupe.4G147100-R	CAACCTTATGCACTCAAGGAA
Prupe.6G025100-F	GAATGCACTGCTGAGAGTG
Prupe.6G025100-R	ACATAATGCCTCTCGTATTGAG
Prupe.6G156300-F	CAGCTGTAAGGAATGGATCAA
Prupe.6G156300-R	CGATGTAGTATAGGCCAAAGC
Prupe.1G476500-F	CTGCATCCTGACTCCACAA
Prupe.1G476500-R	ACACTCCATAATGGCTTTGAAC
Prupe.6G272900-F	CCCTTTGCAAGGAAGGGTA
Prupe.6G272900-R	GGTAGGTCTTTGGACCAATCT
Prupe.8G148400-F	GTAGGAAGCATTGACCCTAAG
Prupe.8G148400-R	CACCACATCTATGGCAGAAG
Prupe.1G449200-F	CTCTACATGTGGCATGGGAA
Prupe.1G449200-R	CCTTTATCAACTCCTCACACTTTC
Prupe.6G010500-F	GTAGGAAGCATTGACCCTAAG
Prupe.6G010500-R	CACCACATCTATGGCAGAAG
Prupe.1G449500-F	TGGTGGATTGACTACACCAAT
Prupe.1G449500-R	GACTGTGAAGAGCAAGGAGAA
Prupe.4G241000-F	TGGCAATGAGAGCCATAACC
Prupe.4G241000-R	CCCTCAAAGACAGAGTGGAAA
Prupe.1G492500-F	TGTCATGCAGGGTTTCTTG
Prupe.1G492500-R	GAGACTGGGTGTAATTGCTATG
Prupe.7G179100-F	GACACAGAAAAGGGGCTATTG
Prupe.7G179100-R	CTACATCTACGCAGTCCGTTA
Prupe.6G195500-F	GTTCTCTCTGGAGTAGCTGT
Prupe.6G195500-R	GGAAAGCCCATCCCATTAAA
Prupe.6G272400-F	CTACACTGCTGGCTTGGTT
Prupe.6G272400-R	GTACTTGGCCAATGCACTC
Prupe.1G080600-F	GAGACTGGCTATTTTTGCTTCATAG
Prupe.1G080600-R	GGTCCACGCCCATAGTATTT
Prupe.1G331100-F	GTTCTACGTCATGTGGTGCA
Prupe.1G331100-R	AGGCGTATTGCTGTCTCATT
Prupe.6G025100-F	GTTCCCTAAGGTGTCAAGCC
Prupe.6G025100-R	GAGTGTGCTACCACTTCTCAG
Prupe.6G211500-F	GCTTTGAAAAGGCATTTCCCT
Prupe.6G211500-R	TGAGATCAATCCACACACAGAA
Prupe.4G024500-F	CAATTTTGTCTGGTGGGTGG
Prupe.4G024500-R	GTGTTCCCAATGCTGAATGTTA
Prupe.4G146200-F	CATTGATAAGAAGCTATATGATGCTGG
Prupe.4G146200-R	GCTCTCCTTCCAACTGCTT
Prupe.1G449200-F	CTCTACATGTGGCATGGGAA
Prupe.1G449200-R	CCTTTATCAACTCCTCACACTTTC
Prupe.1G382700-F	GACGTGTCAAACCTACTCAC
Prupe.1G382700-R	GGTTAGGACTGACGGTAGAT
Prupe.6G010500-F	GGGTTTGTAGGAAGCATTGA
Prupe.6G010500-R	GAAGGTTGAGGCCCATTAAG
Prupe.8G008700-F	TGGATAGCTGAAGGGTTTATTC
Prupe.8G008700-R	CCTTCCACTTTCATTCCTCTT
Prupe.2G243800-F	AGAAGCCCACATCTTCAT
Prupe.2G243800-R	CTCCTCTCTCCGCTAATCT
Prupe.3G005100-F	TTGTGCAGCAGGATCAAAG
Prupe.3G005100-R	CGTTGTATATGTCCCACCATTT
Prupe.6G014700-F	CGATACTTAAGGTTAGCAAGCC
Prupe.6G014700-R	AAGCAATAGAATAGCTCCACTG
Prupe.6G272400-F	CTACACTGCTGGCTTGGTT
Prupe.6G272400-R	GTACTTGGCCAATGCACTC
PpRP II-1F	GTTGATGGATATGTTGACTCTTGATG
PpRP II-1R	ATCAACCACCATGACCTTCTC
PpTEF2-2F	GAAGGGCCTCTTATGCTCTATG
PpTEF2-2R	TCAAACCTGTCTGGACTTTACC
PpUBQ10-2F	GAAGGAGTCCACTCTCCATTTG
PpUBQ10-2R	ACCTCCAGAGTGATGGTCTT
