# Supplementary material for: Morphological, Physiological, Biochemical, and Transcriptome Studies Reveal The Importance of Different Component Traits During Salinity Stress in Prunus
Source: Research Square preprint supplement (doi:10.21203/rs.3.rs-659140/v1), 2021-07-07
Supplement: Supplementary file 2 [file 278e1bfa28a5e3f0033f72c9.xlsx]

## Sheet: TNL_vs_CNL
		Supplementary Table S6. Summary for the gene ontology (GO) enrichment analysis of differentially expressed genes (DEGs).
ID	Ontology	Description	pvalue	p_adj	-log10(P-value)	Count	Gene.ID
GO:0071949	MF	FAD binding	4.34108e-05	0.00481859	10.0448	4	Prupe.1G032800, Prupe.4G097000, Prupe.4G099200, Prupe.4G230400
GO:0016491	MF	oxidoreductase activity	0.000115941	0.00643475	9.06243	11	Prupe.1G032800, Prupe.1G230800, Prupe.2G160400, Prupe.2G161400, Prupe.4G097000, Prupe.4G099200, Prupe.4G230400, Prupe.5G163700, Prupe.6G227100, Prupe.6G324100, Prupe.7G268900
GO:0055114	BP	oxidation-reduction process	0.0003585	0.00795871	7.93358	12	Prupe.1G032800, Prupe.1G230800, Prupe.1G543700, Prupe.2G160400, Prupe.2G161400, Prupe.4G097000, Prupe.4G099200, Prupe.4G230400, Prupe.5G163700, Prupe.6G227100, Prupe.6G324100, Prupe.7G268900
GO:0050660	MF	flavin adenine dinucleotide binding	0.000245088	0.00795871	8.31389	4	Prupe.1G032800, Prupe.4G097000, Prupe.4G099200, Prupe.4G230400
GO:0032440	MF	2-alkenal reductase [NAD(P)+] activity	0.000320247	0.00795871	8.04642	2	Prupe.1G543700, Prupe.7G268900
GO:0002239	BP	response to oomycetes	0.0025929	0.0451787	5.95498	1	Prupe.2G206600
GO:0071277	BP	cellular response to calcium ion	0.0028491	0.0451787	5.86075	1	Prupe.6G333400
GO:0060548	BP	negative regulation of cell death	0.00414714	0.0575415	5.48534	1	Prupe.6G333400
GO:0006542	BP	glutamine biosynthetic process	0.0102316	0.0766727	4.58227	1	Prupe.5G236300
GO:0006556	BP	S-adenosylmethionine biosynthetic process	0.0103255	0.0766727	4.57314	1	Prupe.7G128500
GO:0035821	BP	modulation of process of other organism	0.0103612	0.0766727	4.56969	1	Prupe.1G294500
GO:0004356	MF	glutamate-ammonia ligase activity	0.0102316	0.0766727	4.58227	1	Prupe.5G236300
GO:0004478	MF	methionine adenosyltransferase activity	0.0103255	0.0766727	4.57314	1	Prupe.7G128500
GO:0030598	MF	rRNA N-glycosylase activity	0.0103612	0.0766727	4.56969	1	Prupe.1G294500
GO:0090729	MF	toxin activity	0.0103612	0.0766727	4.56969	1	Prupe.1G294500
GO:0008194	MF	UDP-glycosyltransferase activity	0.013242	0.0912883	4.32436	3	Prupe.3G185000, Prupe.3G189700, Prupe.6G049600
GO:0042626	MF	ATPase-coupled transmembrane transporter activity	0.0139811	0.0912883	4.27005	2	Prupe.1G104100, Prupe.1G104400
GO:0016758	MF	transferase activity, transferring hexosyl groups	0.0152857	0.094262	4.18084	3	Prupe.3G185000, Prupe.3G189700, Prupe.6G049600
GO:0034440	BP	lipid oxidation	0.0226759	0.132475	3.78645	1	Prupe.6G324100
GO:0031408	BP	oxylipin biosynthetic process	0.0272355	0.143438	3.60324	1	Prupe.6G324100
GO:0009395	BP	phospholipid catabolic process	0.0284291	0.143438	3.56034	1	Prupe.2G098700
GO:0005544	MF	calcium-dependent phospholipid binding	0.0271499	0.143438	3.60638	1	Prupe.6G333400
GO:0004497	MF	monooxygenase activity	0.0313006	0.15106	3.46412	3	Prupe.1G230800, Prupe.5G163700, Prupe.6G227100
GO:0016036	BP	cellular response to phosphate starvation	0.03891	0.155436	3.2465	1	Prupe.2G137300
GO:0009696	BP	salicylic acid metabolic process	0.0437644	0.155436	3.12893	1	Prupe.7G141400
GO:0009694	BP	jasmonic acid metabolic process	0.0472283	0.155436	3.05276	1	Prupe.7G141400
GO:0006807	BP	nitrogen compound metabolic process	0.049408	0.155436	3.00764	1	Prupe.5G236300
GO:0009833	BP	plant-type primary cell wall biogenesis	0.0523632	0.155436	2.94955	1	Prupe.1G033900
GO:0030244	BP	cellulose biosynthetic process	0.0549748	0.155436	2.90088	1	Prupe.1G033900
GO:0016740	MF	transferase activity	0.057964	0.155436	2.84793	8	Prupe.1G033900, Prupe.1G469000, Prupe.3G185000, Prupe.3G189700, Prupe.4G027900, Prupe.6G049600, Prupe.6G357200, Prupe.7G128500
GO:0000166	MF	nucleotide binding	0.051886	0.155436	2.95871	7	Prupe.1G104100, Prupe.1G104400, Prupe.1G469000, Prupe.4G027900, Prupe.5G236300, Prupe.6G357200, Prupe.7G128500
GO:0016787	MF	hydrolase activity	0.0530795	0.155436	2.93596	7	Prupe.1G149700, Prupe.1G294500, Prupe.1G440100, Prupe.2G098700, Prupe.2G278200, Prupe.6G136700, Prupe.8G121700
GO:0016705	MF	oxidoreductase activity, acting on paired donors, with incorporation or reduction of molecular oxygen	0.0441897	0.155436	3.11926	3	Prupe.1G230800, Prupe.5G163700, Prupe.6G227100
GO:0005506	MF	iron ion binding	0.0588138	0.155436	2.83338	3	Prupe.1G230800, Prupe.5G163700, Prupe.6G227100
GO:0080030	MF	methyl indole-3-acetate esterase activity	0.0437644	0.155436	3.12893	1	Prupe.7G141400
GO:0080031	MF	methyl salicylate esterase activity	0.0437644	0.155436	3.12893	1	Prupe.7G141400
GO:0080032	MF	methyl jasmonate esterase activity	0.0437644	0.155436	3.12893	1	Prupe.7G141400
GO:0051753	MF	mannan synthase activity	0.0445337	0.155436	3.11151	1	Prupe.1G033900
GO:0016760	MF	cellulose synthase (UDP-forming) activity	0.0512538	0.155436	2.97096	1	Prupe.1G033900
GO:0047372	MF	acylglycerol lipase activity	0.0531981	0.155436	2.93373	1	Prupe.1G440100
GO:0004867	MF	serine-type endopeptidase inhibitor activity	0.0532246	0.155436	2.93323	1	Prupe.1G032000
GO:0016702	MF	oxidoreductase activity, acting on single donors with incorporation of molecular oxygen, incorporation of two atoms of oxygen	0.0560386	0.155436	2.88171	1	Prupe.6G324100
GO:0017148	BP	negative regulation of translation	0.0653477	0.161191	2.72803	1	Prupe.1G294500
GO:0005524	MF	ATP binding	0.0648053	0.161191	2.73637	8	Prupe.1G104100, Prupe.1G104400, Prupe.1G469000, Prupe.2G306100, Prupe.4G027900, Prupe.5G236300, Prupe.6G357200, Prupe.7G128500
GO:0004620	MF	phospholipase activity	0.0648753	0.161191	2.73529	1	Prupe.1G440100
GO:0097502	BP	mannosylation	0.0700449	0.167813	2.65862	1	Prupe.1G033900
GO:0010466	BP	negative regulation of peptidase activity	0.0725679	0.167813	2.62323	1	Prupe.1G032000
GO:0030414	MF	peptidase inhibitor activity	0.0725679	0.167813	2.62323	1	Prupe.1G032000
GO:0071555	BP	cell wall organization	0.0746469	0.169098	2.59499	2	Prupe.1G033900, Prupe.2G278200
GO:0006730	BP	one-carbon metabolic process	0.0772643	0.171527	2.56052	1	Prupe.7G128500
GO:0020037	MF	heme binding	0.0825427	0.179652	2.49444	3	Prupe.1G230800, Prupe.5G163700, Prupe.6G227100
GO:0016757	MF	transferase activity, transferring glycosyl groups	0.0889262	0.189823	2.41995	3	Prupe.1G033900, Prupe.3G185000, Prupe.3G189700
GO:0009611	BP	response to wounding	0.0948508	0.19865	2.35545	1	Prupe.1G032000
GO:0019762	BP	glucosinolate catabolic process	0.0969242	0.199233	2.33383	1	Prupe.6G136700
GO:0010951	BP	negative regulation of endopeptidase activity	0.10113	0.204099	2.29134	1	Prupe.1G032000
GO:0046910	MF	pectinesterase inhibitor activity	0.104393	0.206923	2.25959	1	Prupe.2G278200
GO:0006629	BP	lipid metabolic process	0.1164	0.216784	2.15073	2	Prupe.1G440100, Prupe.6G324100
GO:0006869	BP	lipid transport	0.116872	0.216784	2.14668	1	Prupe.1G316400
GO:0016042	BP	lipid catabolic process	0.117181	0.216784	2.14404	1	Prupe.1G440100
GO:0016709	MF	oxidoreductase activity, acting on paired donors, with incorporation or reduction of molecular oxygen, NAD(P)H as one donor, and incorporation of one atom of oxygen	0.11203	0.216784	2.18899	1	Prupe.6G227100
GO:0016887	MF	ATPase activity	0.121542	0.221167	2.10749	2	Prupe.1G104100, Prupe.1G104400
GO:0007166	BP	cell surface receptor signaling pathway	0.161538	0.262898	1.82301	1	Prupe.6G357200
GO:0009607	BP	response to biotic stimulus	0.165792	0.262898	1.79702	1	Prupe.1G327700
GO:0005886	CC	plasma membrane	0.164285	0.262898	1.80615	5	Prupe.1G033900, Prupe.1G469000, Prupe.4G027900, Prupe.6G333400, Prupe.6G357200
GO:0003824	MF	catalytic activity	0.153536	0.262898	1.87382	3	Prupe.2G098700, Prupe.5G236300, Prupe.6G305100
GO:0045735	MF	nutrient reservoir activity	0.150762	0.262898	1.89205	1	Prupe.1G570800
GO:0008422	MF	beta-glucosidase activity	0.15232	0.262898	1.88177	1	Prupe.6G136700
GO:0004857	MF	enzyme inhibitor activity	0.154448	0.262898	1.8679	1	Prupe.2G278200
GO:0004364	MF	glutathione transferase activity	0.160674	0.262898	1.82837	1	Prupe.4G146400
GO:0045330	MF	aspartyl esterase activity	0.163986	0.262898	1.80798	1	Prupe.2G278200
GO:0043086	BP	negative regulation of catalytic activity	0.169662	0.262908	1.77395	1	Prupe.2G278200
GO:0042545	BP	cell wall modification	0.174814	0.262908	1.74403	1	Prupe.2G278200
GO:0030599	MF	pectinesterase activity	0.172674	0.262908	1.75635	1	Prupe.2G278200
GO:0016874	MF	ligase activity	0.175272	0.262908	1.74142	1	Prupe.5G236300
GO:0006749	BP	glutathione metabolic process	0.184311	0.270767	1.69113	1	Prupe.4G146400
GO:0080043	MF	quercetin 3-O-glucosyltransferase activity	0.187829	0.270767	1.67222	1	Prupe.3G189700
GO:0080044	MF	quercetin 7-O-glucosyltransferase activity	0.187829	0.270767	1.67222	1	Prupe.3G189700
GO:0006631	BP	fatty acid metabolic process	0.197131	0.280532	1.62389	1	Prupe.6G324100
GO:0004674	MF	protein serine/threonine kinase activity	0.200454	0.281651	1.60717	3	Prupe.1G469000, Prupe.4G027900, Prupe.6G357200
GO:0006952	BP	defense response	0.212305	0.287389	1.54973	2	Prupe.1G294500, Prupe.1G327700
GO:0045490	BP	pectin catabolic process	0.211922	0.287389	1.55154	1	Prupe.2G278200
GO:0051213	MF	dioxygenase activity	0.209979	0.287389	1.56075	1	Prupe.6G324100
GO:0006633	BP	fatty acid biosynthetic process	0.224124	0.299733	1.49555	1	Prupe.6G324100
GO:0005802	CC	trans-Golgi network	0.227108	0.300106	1.48233	1	Prupe.1G033900
GO:0004672	MF	protein kinase activity	0.238436	0.311369	1.43366	4	Prupe.1G469000, Prupe.2G306100, Prupe.4G027900, Prupe.6G357200
GO:0008289	MF	lipid binding	0.248908	0.321266	1.39067	1	Prupe.1G316400
GO:0006468	BP	protein phosphorylation	0.256317	0.325572	1.36134	4	Prupe.1G469000, Prupe.2G306100, Prupe.4G027900, Prupe.6G357200
GO:0009651	BP	response to salt stress	0.259123	0.325572	1.35045	1	Prupe.6G136700
GO:0022900	BP	electron transport chain	0.261044	0.325572	1.34306	1	Prupe.7G246500
GO:0016301	MF	kinase activity	0.277655	0.339657	1.28138	3	Prupe.1G469000, Prupe.4G027900, Prupe.6G357200
GO:0016788	MF	hydrolase activity, acting on ester bonds	0.278458	0.339657	1.27849	1	Prupe.2G098700
GO:0016310	BP	phosphorylation	0.298136	0.359708	1.2102	3	Prupe.1G469000, Prupe.4G027900, Prupe.6G357200
GO:0009055	MF	electron transfer activity	0.318526	0.380176	1.14405	1	Prupe.7G246500
GO:0046658	CC	anchored component of plasma membrane	0.341164	0.402864	1.07539	1	Prupe.7G246500
GO:0009506	CC	plasmodesma	0.385631	0.449017	0.952875	1	Prupe.2G206600
GO:0003700	MF	DNA-binding transcription factor activity	0.388339	0.449017	0.945876	2	Prupe.1G269200, Prupe.6G133800
GO:0004553	MF	hydrolase activity, hydrolyzing O-glycosyl compounds	0.444204	0.508316	0.811471	1	Prupe.6G136700
GO:0046872	MF	metal ion binding	0.454577	0.514878	0.788388	5	Prupe.1G230800, Prupe.5G163700, Prupe.6G227100, Prupe.6G324100, Prupe.7G128500
GO:0043565	MF	sequence-specific DNA binding	0.515745	0.578259	0.662143	1	Prupe.1G269200
GO:0055085	BP	transmembrane transport	0.534247	0.593014	0.626897	2	Prupe.1G104100, Prupe.1G104400
GO:0016020	CC	membrane	0.55328	0.602099	0.591891	15	Prupe.1G033900, Prupe.1G104100, Prupe.1G104400, Prupe.1G199700, Prupe.1G469000, Prupe.1G570800, Prupe.2G002500, Prupe.2G080900, Prupe.2G160400, Prupe.2G161400, Prupe.2G206600, Prupe.2G306100, Prupe.4G027900, Prupe.6G227100, Prupe.6G357200
GO:0005618	CC	cell wall	0.550394	0.602099	0.597121	1	Prupe.2G278200
GO:0005737	CC	cytoplasm	0.576203	0.620956	0.551296	4	Prupe.4G146400, Prupe.5G236300, Prupe.6G324100, Prupe.7G128500
GO:0016021	CC	integral component of membrane	0.657493	0.701748	0.419321	13	Prupe.1G033900, Prupe.1G104100, Prupe.1G104400, Prupe.1G199700, Prupe.1G469000, Prupe.1G570800, Prupe.2G002500, Prupe.2G080900, Prupe.2G206600, Prupe.2G306100, Prupe.4G027900, Prupe.6G227100, Prupe.6G357200
GO:0005975	BP	carbohydrate metabolic process	0.705124	0.745416	0.349382	1	Prupe.6G136700
GO:0006355	BP	regulation of transcription, DNA-templated	0.768396	0.804641	0.263451	2	Prupe.1G269200, Prupe.6G133800
GO:0005576	CC	extracellular region	0.782993	0.812264	0.244632	1	Prupe.2G278200
GO:0005515	MF	protein binding	0.79985	0.822068	0.223331	5	Prupe.1G072100, Prupe.2G080900, Prupe.2G306100, Prupe.4G146400, Prupe.6G324100
GO:0005829	CC	cytosol	0.851419	0.867042	0.160851	1	Prupe.7G128500
GO:0003677	MF	DNA binding	0.966675	0.975463	0.0338926	1	Prupe.1G269200
GO:0005634	CC	nucleus	0.997474	0.997474	0.00252886	2	Prupe.1G269200, Prupe.1G312500

## Sheet: TNR_vs_CNR
		Supplementary Table S7. Summary for gene ontology (GO) enrichment analysis of DEGs					Supplementary Table S6. Summary for the gene ontology (GO) enrichment analysis of differentially expressed genes (DEGs).
ID	Ontology	Description	pvalue	p_adj	-log10(P-value)	Count	Gene.ID
GO:0009607	BP	response to biotic stimulus	0.000596984	0.0102681	7.42362	3	Prupe.8G153100, Prupe.8G153700, Prupe.8G153800
GO:0006694	BP	steroid biosynthetic process	0.00055817	0.0102681	7.49085	2	Prupe.2G020700, Prupe.2G021100
GO:0080043	MF	quercetin 3-O-glucosyltransferase activity	0.00056198	0.0102681	7.48404	3	Prupe.1G169300, Prupe.6G189900, Prupe.8G186200
GO:0080044	MF	quercetin 7-O-glucosyltransferase activity	0.00056198	0.0102681	7.48404	3	Prupe.1G169300, Prupe.6G189900, Prupe.8G186200
GO:0003854	MF	3-beta-hydroxy-delta5-steroid dehydrogenase activity	0.000280242	0.0102681	8.17986	2	Prupe.2G020700, Prupe.2G021100
GO:0010226	BP	response to lithium ion	0.0016776	0.0222632	6.39039	1	Prupe.6G354100
GO:0080162	BP	intracellular auxin transport	0.002071	0.0222632	6.17973	1	Prupe.6G360300
GO:0080161	MF	auxin transmembrane transporter activity	0.002071	0.0222632	6.17973	1	Prupe.6G360300
GO:0005615	CC	extracellular space	0.00258702	0.0247204	5.95725	3	Prupe.8G153100, Prupe.8G153700, Prupe.8G153800
GO:0055114	BP	oxidation-reduction process	0.00691679	0.0528338	4.9738	8	Prupe.1G092400, Prupe.1G230500, Prupe.1G292500, Prupe.2G020700, Prupe.2G021100, Prupe.2G250900, Prupe.4G072700, Prupe.6G038200
GO:0016757	MF	transferase activity, transferring glycosyl groups	0.0077561	0.0528338	4.85928	4	Prupe.1G169300, Prupe.6G186000, Prupe.6G189900, Prupe.8G186200
GO:0008194	MF	UDP-glycosyltransferase activity	0.00697401	0.0528338	4.96557	3	Prupe.1G169300, Prupe.6G189900, Prupe.8G186200
GO:0016758	MF	transferase activity, transferring hexosyl groups	0.0079865	0.0528338	4.83	3	Prupe.1G169300, Prupe.6G189900, Prupe.8G186200
GO:0080143	BP	regulation of amino acid export	0.0101877	0.0591612	4.58657	1	Prupe.3G245400
GO:0005782	CC	peroxisomal matrix	0.0103188	0.0591612	4.57379	1	Prupe.3G017400
GO:0010315	BP	auxin efflux	0.0142574	0.0655879	4.25048	1	Prupe.6G360300
GO:0042538	BP	hyperosmotic salinity response	0.0144903	0.0655879	4.23427	1	Prupe.6G354100
GO:0004497	MF	monooxygenase activity	0.014084	0.0655879	4.26272	3	Prupe.1G230500, Prupe.1G292500, Prupe.6G038200
GO:0010329	MF	auxin efflux transmembrane transporter activity	0.0134085	0.0655879	4.31187	1	Prupe.6G360300
GO:0010252	BP	auxin homeostasis	0.0155269	0.0667657	4.16518	1	Prupe.6G360300
GO:0006355	BP	regulation of transcription, DNA-templated	0.0180267	0.0729616	4.0159	6	Prupe.1G051300, Prupe.3G178000, Prupe.4G106100, Prupe.5G090000, Prupe.7G194400, Prupe.8G125100
GO:0009734	BP	auxin-activated signaling pathway	0.0210997	0.0729616	3.8585	2	Prupe.1G356000, Prupe.6G360300
GO:0009926	BP	auxin polar transport	0.0205636	0.0729616	3.88424	1	Prupe.6G360300
GO:0000302	BP	response to reactive oxygen species	0.0205888	0.0729616	3.88301	1	Prupe.3G017400
GO:0016705	MF	oxidoreductase activity, acting on paired donors, with incorporation or reduction of molecular oxygen	0.0212098	0.0729616	3.85329	3	Prupe.1G230500, Prupe.1G292500, Prupe.6G038200
GO:0016616	MF	oxidoreductase activity, acting on the CH-OH group of donors, NAD or NADP as acceptor	0.0231004	0.0764089	3.76791	2	Prupe.2G020700, Prupe.2G021100
GO:0006952	BP	defense response	0.030375	0.0869951	3.49414	3	Prupe.8G153100, Prupe.8G153700, Prupe.8G153800
GO:0009751	BP	response to salicylic acid	0.0279872	0.0869951	3.57601	1	Prupe.6G354100
GO:0009696	BP	salicylic acid metabolic process	0.0333818	0.0869951	3.39974	1	Prupe.6G040000
GO:0005506	MF	iron ion binding	0.0285865	0.0869951	3.55482	3	Prupe.1G230500, Prupe.1G292500, Prupe.6G038200
GO:0080030	MF	methyl indole-3-acetate esterase activity	0.0333818	0.0869951	3.39974	1	Prupe.6G040000
GO:0080031	MF	methyl salicylate esterase activity	0.0333818	0.0869951	3.39974	1	Prupe.6G040000
GO:0080032	MF	methyl jasmonate esterase activity	0.0333818	0.0869951	3.39974	1	Prupe.6G040000
GO:0009694	BP	jasmonic acid metabolic process	0.0356734	0.0902326	3.33335	1	Prupe.6G040000
GO:0046593	MF	mandelonitrile lyase activity	0.0368261	0.090487	3.30155	1	Prupe.1G092400
GO:0005576	CC	extracellular region	0.0384927	0.0919548	3.25729	4	Prupe.3G215600, Prupe.8G153100, Prupe.8G153700, Prupe.8G153800
GO:0003677	MF	DNA binding	0.0412829	0.0959548	3.18731	6	Prupe.1G051300, Prupe.3G178000, Prupe.4G106100, Prupe.5G090000, Prupe.7G194400, Prupe.8G125100
GO:0020037	MF	heme binding	0.0426099	0.096433	3.15567	3	Prupe.1G230500, Prupe.1G292500, Prupe.6G038200
GO:0016614	MF	oxidoreductase activity, acting on CH-OH group of donors	0.0487554	0.107512	3.02094	1	Prupe.1G092400
GO:0006351	BP	transcription, DNA-templated	0.0522308	0.112296	2.95208	3	Prupe.5G090000, Prupe.7G194400, Prupe.8G125100
GO:0051259	BP	protein complex oligomerization	0.0546296	0.114589	2.90718	1	Prupe.3G017400
GO:0009555	BP	pollen development	0.0578712	0.117676	2.84954	1	Prupe.6G360300
GO:0016491	MF	oxidoreductase activity	0.0588382	0.117676	2.83296	5	Prupe.1G230500, Prupe.1G292500, Prupe.2G250900, Prupe.4G072700, Prupe.6G038200
GO:0042542	BP	response to hydrogen peroxide	0.0682599	0.130753	2.68443	1	Prupe.3G017400
GO:0050662	MF	coenzyme binding	0.0684172	0.130753	2.68213	1	Prupe.2G020700
GO:0043621	MF	protein self-association	0.0736981	0.137783	2.60778	1	Prupe.3G017400
GO:0003700	MF	DNA-binding transcription factor activity	0.0845521	0.154712	2.47039	3	Prupe.5G090000, Prupe.7G194400, Prupe.8G125100
GO:0009408	BP	response to heat	0.0974993	0.172365	2.32791	1	Prupe.3G017400
GO:0010468	BP	regulation of gene expression	0.0982079	0.172365	2.32067	1	Prupe.8G142100
GO:0015293	MF	symporter activity	0.110404	0.189895	2.20361	1	Prupe.1G356000
GO:0006865	BP	amino acid transport	0.115899	0.195438	2.15503	1	Prupe.1G356000
GO:0042626	MF	ATPase-coupled transmembrane transporter activity	0.124289	0.205555	2.08514	1	Prupe.6G121800
GO:0055085	BP	transmembrane transport	0.130442	0.211661	2.03682	3	Prupe.1G356000, Prupe.6G121800, Prupe.6G360300
GO:0050832	BP	defense response to fungus	0.144963	0.230867	1.93127	1	Prupe.6G343900
GO:0042742	BP	defense response to bacterium	0.151158	0.236357	1.88943	1	Prupe.6G343900
GO:0051213	MF	dioxygenase activity	0.160475	0.246444	1.82962	1	Prupe.2G250900
GO:0006486	BP	protein glycosylation	0.165863	0.25025	1.79659	1	Prupe.6G186000
GO:0009651	BP	response to salt stress	0.198063	0.286971	1.61917	1	Prupe.3G017400
GO:0051082	MF	unfolded protein binding	0.199477	0.286971	1.61206	1	Prupe.3G017400
GO:0050660	MF	flavin adenine dinucleotide binding	0.200212	0.286971	1.60838	1	Prupe.1G092400
GO:0006457	BP	protein folding	0.208909	0.294267	1.56586	1	Prupe.3G017400
GO:0016788	MF	hydrolase activity, acting on ester bonds	0.212146	0.294267	1.55048	1	Prupe.6G354100
GO:0046872	MF	metal ion binding	0.234564	0.320198	1.45003	5	Prupe.1G230500, Prupe.1G292500, Prupe.2G250900, Prupe.4G072700, Prupe.6G038200
GO:0000139	CC	Golgi membrane	0.260601	0.350182	1.34477	1	Prupe.6G186000
GO:0048046	CC	apoplast	0.305215	0.403823	1.18674	1	Prupe.3G215600
GO:0016829	MF	lyase activity	0.324234	0.422487	1.12629	1	Prupe.1G092400
GO:0005509	MF	calcium ion binding	0.345186	0.443075	1.06367	1	Prupe.3G303600
GO:0005634	CC	nucleus	0.365284	0.448778	1.00708	7	Prupe.1G051300, Prupe.3G178000, Prupe.4G106100, Prupe.5G090000, Prupe.6G212000, Prupe.7G194400, Prupe.8G125100
GO:0016740	MF	transferase activity	0.360976	0.448778	1.01894	4	Prupe.1G169300, Prupe.6G189900, Prupe.7G219500, Prupe.8G186200
GO:0016887	MF	ATPase activity	0.355304	0.448778	1.03478	1	Prupe.6G121800
GO:0043565	MF	sequence-specific DNA binding	0.420074	0.508822	0.867325	1	Prupe.1G051300
GO:0046983	MF	protein dimerization activity	0.428853	0.512241	0.846641	1	Prupe.6G212000
GO:0005783	CC	endoplasmic reticulum	0.481878	0.567692	0.730064	1	Prupe.6G360300
GO:0005794	CC	Golgi apparatus	0.550583	0.639867	0.596777	1	Prupe.6G186000
GO:0005886	CC	plasma membrane	0.626207	0.708602	0.468075	2	Prupe.1G356000, Prupe.6G360300
GO:0003824	MF	catalytic activity	0.622808	0.708602	0.473517	1	Prupe.2G020700
GO:0004674	MF	protein serine/threonine kinase activity	0.662075	0.73946	0.412377	1	Prupe.7G219500
GO:0000166	MF	nucleotide binding	0.695515	0.76685	0.363103	2	Prupe.6G121800, Prupe.7G219500
GO:0016301	MF	kinase activity	0.724118	0.78828	0.322801	1	Prupe.7G219500
GO:0016310	BP	phosphorylation	0.739492	0.794954	0.301792	1	Prupe.7G219500
GO:0016021	CC	integral component of membrane	0.768003	0.815411	0.263962	9	Prupe.1G292500, Prupe.1G356000, Prupe.3G245400, Prupe.5G139400, Prupe.6G038200, Prupe.6G121800, Prupe.6G186000, Prupe.6G360300, Prupe.7G219500
GO:0006468	BP	protein phosphorylation	0.843089	0.856531	0.170683	1	Prupe.7G219500
GO:0016020	CC	membrane	0.846571	0.856531	0.166561	9	Prupe.1G292500, Prupe.1G356000, Prupe.3G245400, Prupe.5G139400, Prupe.6G038200, Prupe.6G121800, Prupe.6G186000, Prupe.6G360300, Prupe.7G219500
GO:0005524	MF	ATP binding	0.819663	0.856531	0.198862	2	Prupe.6G121800, Prupe.7G219500
GO:0004672	MF	protein kinase activity	0.832106	0.856531	0.183795	1	Prupe.7G219500
GO:0005515	MF	protein binding	0.95945	0.95945	0.0413946	2	Prupe.2G130400, Prupe.7G219500

## Sheet: TRL_vs_CRL
		Supplementary Table S6. Summary for the gene ontology (GO) enrichment analysis of differentially expressed genes (DEGs).
ID	Ontology	Description	pvalue	p_adj	-log10(P-value)	Count	Gene.ID
GO:0007142	BP	male meiosis II	0.00133934	0.0267708	6.61558	1	Prupe.3G178400
GO:0010197	BP	polar nucleus fusion	0.00267708	0.0267708	5.92303	1	Prupe.1G350700
GO:0044772	BP	mitotic cell cycle phase transition	0.00900962	0.0456204	4.70946	1	Prupe.4G034400
GO:0051726	BP	regulation of cell cycle	0.0103382	0.0456204	4.57191	1	Prupe.4G034400
GO:0000079	BP	regulation of cyclin-dependent protein serine/threonine kinase activity	0.0159671	0.0456204	4.13722	1	Prupe.4G034400
GO:0000307	CC	cyclin-dependent protein kinase holoenzyme complex	0.0146453	0.0456204	4.22364	1	Prupe.4G034400
GO:0016538	MF	cyclin-dependent protein serine/threonine kinase regulator activity	0.0126595	0.0456204	4.36935	1	Prupe.4G034400
GO:0051301	BP	cell division	0.0336589	0.0686175	3.39148	1	Prupe.4G034400
GO:0007049	BP	cell cycle	0.0343087	0.0686175	3.37236	1	Prupe.4G034400
GO:0071949	MF	FAD binding	0.02812	0.0686175	3.57127	1	Prupe.1G032800
GO:0050660	MF	flavin adenine dinucleotide binding	0.0452958	0.0823561	3.09454	1	Prupe.1G032800
GO:0016491	MF	oxidoreductase activity	0.0617536	0.102923	2.7846	2	Prupe.1G032800, Prupe.6G138700
GO:0055114	BP	oxidation-reduction process	0.100637	0.154826	2.29623	2	Prupe.1G032800, Prupe.6G138700
GO:0005515	MF	protein binding	0.279353	0.399075	1.27528	2	Prupe.1G219000, Prupe.2G080900
GO:0005634	CC	nucleus	0.348738	0.464984	1.05343	2	Prupe.1G350700, Prupe.4G034400
GO:0003677	MF	DNA binding	0.403557	0.504446	0.907438	1	Prupe.1G350700
GO:0005737	CC	cytoplasm	0.490655	0.56191	0.712015	1	Prupe.4G034400
GO:0046872	MF	metal ion binding	0.505719	0.56191	0.681774	1	Prupe.3G242700
GO:0016021	CC	integral component of membrane	0.905283	0.92489	0.0995082	1	Prupe.2G080900
GO:0016020	CC	membrane	0.92489	0.92489	0.0780803	1	Prupe.2G080900

## Sheet: TRR_vs_CRR
		Supplementary Table S6. Summary for the gene ontology (GO) enrichment analysis of differentially expressed genes (DEGs).
ID	Ontology	Description	pvalue	p_adj	-log10(P-value)	Count	Gene.ID
GO:0051259	BP	protein complex oligomerization	2.18947e-05	0.000487293	10.7293	2	Prupe.1G586200, Prupe.2G243400
GO:0042542	BP	response to hydrogen peroxide	3.77569e-05	0.000487293	10.1843	2	Prupe.1G586200, Prupe.2G243400
GO:0043621	MF	protein self-association	4.71574e-05	0.000487293	9.96202	2	Prupe.1G586200, Prupe.2G243400
GO:0005764	CC	lysosome	6.78128e-05	0.000525549	9.59876	2	Prupe.3G122000, Prupe.4G059600
GO:0009408	BP	response to heat	9.29884e-05	0.000576528	9.28304	2	Prupe.1G586200, Prupe.2G243400
GO:0051603	BP	proteolysis involved in cellular protein catabolic process	0.000136145	0.000679324	8.90179	2	Prupe.3G122000, Prupe.4G059600
GO:0004197	MF	cysteine-type endopeptidase activity	0.000153396	0.000679324	8.78249	2	Prupe.3G122000, Prupe.4G059600
GO:0009651	BP	response to salt stress	0.000463453	0.00157702	7.67681	2	Prupe.1G586200, Prupe.2G243400
GO:0006457	BP	protein folding	0.000515463	0.00157702	7.57045	2	Prupe.1G586200, Prupe.2G243400
GO:0005615	CC	extracellular space	0.000559587	0.00157702	7.48831	2	Prupe.3G122000, Prupe.4G059600
GO:0051082	MF	unfolded protein binding	0.00045609	0.00157702	7.69282	2	Prupe.1G586200, Prupe.2G243400
GO:0008234	MF	cysteine-type peptidase activity	0.000742829	0.00191897	7.20505	2	Prupe.3G122000, Prupe.4G059600
GO:0008233	MF	peptidase activity	0.00202972	0.00484009	6.19986	2	Prupe.3G122000, Prupe.4G059600
GO:2000582	BP	positive regulation of ATP-dependent microtubule motor activity, plus-end-directed	0.00297	0.00541588	5.81919	1	Prupe.6G263700
GO:0030286	CC	dynein complex	0.00297	0.00541588	5.81919	1	Prupe.6G263700
GO:0045505	MF	dynein intermediate chain binding	0.00297	0.00541588	5.81919	1	Prupe.6G263700
GO:0051959	MF	dynein light intermediate chain binding	0.00297	0.00541588	5.81919	1	Prupe.6G263700
GO:0006508	BP	proteolysis	0.00753129	0.0129706	4.88869	2	Prupe.3G122000, Prupe.4G059600
GO:0007017	BP	microtubule-based process	0.00861413	0.0140546	4.75435	1	Prupe.6G263700
GO:0003774	MF	motor activity	0.0156538	0.0242633	4.15704	1	Prupe.6G263700
GO:0005856	CC	cytoskeleton	0.0200368	0.0295781	3.91018	1	Prupe.6G263700
GO:0005874	CC	microtubule	0.0280561	0.0395337	3.57355	1	Prupe.6G263700
GO:0016787	MF	hydrolase activity	0.0541244	0.0729503	2.91647	2	Prupe.3G122000, Prupe.4G059600
GO:0006351	BP	transcription, DNA-templated	0.116117	0.149985	2.15315	1	Prupe.5G141200
GO:0003700	MF	DNA-binding transcription factor activity	0.141027	0.174873	1.95881	1	Prupe.5G141200
GO:0006355	BP	regulation of transcription, DNA-templated	0.272868	0.317037	1.29877	1	Prupe.5G141200
GO:0016491	MF	oxidoreductase activity	0.276129	0.317037	1.28689	1	Prupe.6G138700
GO:0003677	MF	DNA binding	0.325634	0.360523	1.12198	1	Prupe.5G141200
GO:0055114	BP	oxidation-reduction process	0.352945	0.377286	1.04144	1	Prupe.6G138700
GO:0005737	CC	cytoplasm	0.383074	0.395843	0.959526	1	Prupe.6G263700
GO:0005634	CC	nucleus	0.617142	0.617142	0.482656	1	Prupe.5G141200

## Sheet: CNL_vs_CRL
		Supplementary Table S6. Summary for the gene ontology (GO) enrichment analysis of differentially expressed genes (DEGs).
ID	Ontology	Description	pvalue	p_adj	-log10(P-value)	Count	Gene.ID
GO:0006952	BP	defense response	1.27107e-26	1.97271e-23	59.6274	128	Prupe.1G018600, Prupe.1G018700, Prupe.1G041300, Prupe.1G043100, Prupe.1G048000, Prupe.1G051500, Prupe.1G080500, Prupe.1G080600, Prupe.1G080700, Prupe.1G091300, Prupe.1G091400, Prupe.1G122900, Prupe.1G127200, Prupe.1G127300, Prupe.1G127400, Prupe.1G127500, Prupe.1G127700, Prupe.1G127800, Prupe.1G127900, Prupe.1G128400, Prupe.1G128700, Prupe.1G129000, Prupe.1G159600, Prupe.1G161700, Prupe.1G163600,…
GO:0043531	MF	ADP binding	1.26736e-24	9.83471e-22	55.0251	119	Prupe.1G018600, Prupe.1G018700, Prupe.1G041300, Prupe.1G043100, Prupe.1G048000, Prupe.1G051500, Prupe.1G159600, Prupe.1G161700, Prupe.1G161800, Prupe.1G163600, Prupe.1G163700, Prupe.1G163800, Prupe.1G263400, Prupe.1G524000, Prupe.1G528900, Prupe.1G541300, Prupe.1G542800, Prupe.1G545000, Prupe.1G545200, Prupe.1G545300, Prupe.2G011400, Prupe.2G014100, Prupe.2G025200, Prupe.2G029200, Prupe.2G043200,…
GO:0008194	MF	UDP-glycosyltransferase activity	1.71039e-13	8.84841e-11	29.3969	68	Prupe.1G091100, Prupe.1G169200, Prupe.1G179000, Prupe.1G180900, Prupe.1G519500, Prupe.1G519600, Prupe.1G519700, Prupe.1G520300, Prupe.1G547800, Prupe.1G552100, Prupe.2G085000, Prupe.2G085300, Prupe.2G174700, Prupe.2G243600, Prupe.2G324700, Prupe.3G184700, Prupe.3G185000, Prupe.3G185100, Prupe.3G188500, Prupe.3G189100, Prupe.3G189500, Prupe.3G189700, Prupe.3G190400, Prupe.3G190500, Prupe.3G256000,…
GO:0016758	MF	transferase activity, transferring hexosyl groups	9.52016e-13	3.69382e-10	27.6802	69	Prupe.1G091100, Prupe.1G169200, Prupe.1G179000, Prupe.1G180900, Prupe.1G519500, Prupe.1G519600, Prupe.1G519700, Prupe.1G520300, Prupe.1G547800, Prupe.1G552100, Prupe.2G085000, Prupe.2G085300, Prupe.2G117600, Prupe.2G174700, Prupe.2G243600, Prupe.2G324700, Prupe.3G184700, Prupe.3G185000, Prupe.3G185100, Prupe.3G188500, Prupe.3G189100, Prupe.3G189500, Prupe.3G189700, Prupe.3G190400, Prupe.3G190500,…
GO:0016021	CC	integral component of membrane	1.99391e-12	6.18909e-10	26.9409	934	Prupe.1G015700, Prupe.1G023400, Prupe.1G033700, Prupe.1G033900, Prupe.1G042800, Prupe.1G043400, Prupe.1G045600, Prupe.1G048300, Prupe.1G058700, Prupe.1G063200, Prupe.1G066500, Prupe.1G069000, Prupe.1G074000, Prupe.1G078700, Prupe.1G090700, Prupe.1G095900, Prupe.1G096900, Prupe.1G098400, Prupe.1G100100, Prupe.1G104300, Prupe.1G104400, Prupe.1G110700, Prupe.1G123300, Prupe.1G125800, Prupe.1G139900,…
GO:0004672	MF	protein kinase activity	2.75541e-12	7.12732e-10	26.6175	218	Prupe.1G074000, Prupe.1G083300, Prupe.1G139900, Prupe.1G145600, Prupe.1G157800, Prupe.1G168400, Prupe.1G177000, Prupe.1G269800, Prupe.1G314900, Prupe.1G315100, Prupe.1G315400, Prupe.1G336000, Prupe.1G343600, Prupe.1G427400, Prupe.1G429700, Prupe.1G429800, Prupe.1G443900, Prupe.1G444700, Prupe.1G447000, Prupe.1G452900, Prupe.1G469200, Prupe.1G474000, Prupe.1G489100, Prupe.1G502100, Prupe.1G505700,…
GO:0006468	BP	protein phosphorylation	1.10798e-11	2.45655e-09	25.2259	221	Prupe.1G074000, Prupe.1G083300, Prupe.1G139900, Prupe.1G145600, Prupe.1G157800, Prupe.1G168400, Prupe.1G177000, Prupe.1G244900, Prupe.1G269800, Prupe.1G314900, Prupe.1G315100, Prupe.1G315400, Prupe.1G336000, Prupe.1G343600, Prupe.1G427400, Prupe.1G429700, Prupe.1G429800, Prupe.1G443900, Prupe.1G444700, Prupe.1G447000, Prupe.1G452900, Prupe.1G469200, Prupe.1G474000, Prupe.1G489100, Prupe.1G502100,…
GO:0050135	MF	NAD(P)+ nucleosidase activity	3.7444e-11	6.45701e-09	24.0082	42	Prupe.1G018600, Prupe.1G018700, Prupe.1G161700, Prupe.1G161800, Prupe.1G263400, Prupe.1G524000, Prupe.2G055700, Prupe.2G057100, Prupe.2G059400, Prupe.2G083200, Prupe.2G112700, Prupe.2G113100, Prupe.2G113200, Prupe.2G126900, Prupe.2G127000, Prupe.3G009700, Prupe.3G010100, Prupe.3G010200, Prupe.6G083100, Prupe.6G132100, Prupe.6G160100, Prupe.7G037000, Prupe.7G037600, Prupe.8G005100, Prupe.8G005400,…
GO:0061809	MF	NAD+ nucleotidase, cyclic ADP-ribose generating	3.7444e-11	6.45701e-09	24.0082	42	Prupe.1G018600, Prupe.1G018700, Prupe.1G161700, Prupe.1G161800, Prupe.1G263400, Prupe.1G524000, Prupe.2G055700, Prupe.2G057100, Prupe.2G059400, Prupe.2G083200, Prupe.2G112700, Prupe.2G113100, Prupe.2G113200, Prupe.2G126900, Prupe.2G127000, Prupe.3G009700, Prupe.3G010100, Prupe.3G010200, Prupe.6G083100, Prupe.6G132100, Prupe.6G160100, Prupe.7G037000, Prupe.7G037600, Prupe.8G005100, Prupe.8G005400,…
GO:0016020	CC	membrane	7.74844e-11	1.20256e-08	23.2809	987	Prupe.1G015700, Prupe.1G023400, Prupe.1G033700, Prupe.1G033900, Prupe.1G042800, Prupe.1G043400, Prupe.1G045600, Prupe.1G048300, Prupe.1G058700, Prupe.1G063200, Prupe.1G066500, Prupe.1G069000, Prupe.1G074000, Prupe.1G078700, Prupe.1G090700, Prupe.1G095900, Prupe.1G096900, Prupe.1G098400, Prupe.1G100100, Prupe.1G104300, Prupe.1G104400, Prupe.1G110700, Prupe.1G123300, Prupe.1G125800, Prupe.1G139900,…
GO:0016491	MF	oxidoreductase activity	2.38497e-10	3.36497e-08	22.1567	235	Prupe.1G011900, Prupe.1G012000, Prupe.1G012100, Prupe.1G032800, Prupe.1G036400, Prupe.1G036700, Prupe.1G171200, Prupe.1G229700, Prupe.1G230500, Prupe.1G233400, Prupe.1G239200, Prupe.1G245400, Prupe.1G291500, Prupe.1G291800, Prupe.1G292400, Prupe.1G292500, Prupe.1G296300, Prupe.1G296600, Prupe.1G296900, Prupe.1G336800, Prupe.1G339000, Prupe.1G343000, Prupe.1G345300, Prupe.1G356700, Prupe.1G357100,…
GO:0055114	BP	oxidation-reduction process	1.06487e-09	1.37723e-07	20.6604	295	Prupe.1G007400, Prupe.1G011900, Prupe.1G012000, Prupe.1G012100, Prupe.1G032800, Prupe.1G036400, Prupe.1G036700, Prupe.1G046800, Prupe.1G063200, Prupe.1G092900, Prupe.1G093600, Prupe.1G093800, Prupe.1G099500, Prupe.1G140500, Prupe.1G171200, Prupe.1G229700, Prupe.1G230500, Prupe.1G233400, Prupe.1G239200, Prupe.1G245400, Prupe.1G291500, Prupe.1G291800, Prupe.1G292400, Prupe.1G292500, Prupe.1G296300,…
GO:0044772	BP	mitotic cell cycle phase transition	1.54794e-09	1.848e-07	20.2863	17	Prupe.1G335600, Prupe.1G338000, Prupe.1G428100, Prupe.1G430500, Prupe.1G467200, Prupe.1G491700, Prupe.3G228000, Prupe.4G034400, Prupe.4G130400, Prupe.4G269600, Prupe.6G021200, Prupe.6G021300, Prupe.7G180800, Prupe.8G131900, Prupe.8G137700, Prupe.8G146700, Prupe.8G177900
GO:0016757	MF	transferase activity, transferring glycosyl groups	7.74327e-09	8.58397e-07	18.6764	102	Prupe.1G033700, Prupe.1G033900, Prupe.1G091100, Prupe.1G110700, Prupe.1G166300, Prupe.1G169200, Prupe.1G179000, Prupe.1G180900, Prupe.1G278500, Prupe.1G281500, Prupe.1G283400, Prupe.1G294000, Prupe.1G305600, Prupe.1G314700, Prupe.1G457800, Prupe.1G482300, Prupe.1G483200, Prupe.1G503400, Prupe.1G519500, Prupe.1G519600, Prupe.1G520300, Prupe.1G547800, Prupe.1G552100, Prupe.1G581600, Prupe.2G005200,…
GO:0004553	MF	hydrolase activity, hydrolyzing O-glycosyl compounds	1.63965e-08	1.69649e-06	17.9262	65	Prupe.1G169700, Prupe.1G309900, Prupe.1G331000, Prupe.1G372800, Prupe.1G380300, Prupe.1G513200, Prupe.2G005100, Prupe.2G092300, Prupe.2G092900, Prupe.2G154800, Prupe.2G181400, Prupe.2G198000, Prupe.2G198100, Prupe.2G277900, Prupe.2G305200, Prupe.2G314200, Prupe.3G009500, Prupe.3G016900, Prupe.3G048300, Prupe.3G086200, Prupe.3G111000, Prupe.3G210700, Prupe.3G211500, Prupe.3G223200, Prupe.4G025600,…
GO:0016740	MF	transferase activity	5.86331e-08	5.68741e-06	16.652	308	Prupe.1G011700, Prupe.1G016700, Prupe.1G023000, Prupe.1G033700, Prupe.1G033900, Prupe.1G074000, Prupe.1G083300, Prupe.1G091100, Prupe.1G110700, Prupe.1G132100, Prupe.1G145600, Prupe.1G168400, Prupe.1G169200, Prupe.1G169700, Prupe.1G179000, Prupe.1G180900, Prupe.1G212000, Prupe.1G216000, Prupe.1G227100, Prupe.1G278500, Prupe.1G280400, Prupe.1G281500, Prupe.1G283400, Prupe.1G294000, Prupe.1G305600,…
GO:0004497	MF	monooxygenase activity	6.8255e-08	6.23128e-06	16.5	71	Prupe.1G046800, Prupe.1G229700, Prupe.1G230500, Prupe.1G291500, Prupe.1G291800, Prupe.1G292400, Prupe.1G292500, Prupe.1G296300, Prupe.1G296600, Prupe.1G296900, Prupe.1G381900, Prupe.1G386800, Prupe.1G386900, Prupe.1G387000, Prupe.1G387100, Prupe.1G387200, Prupe.1G387500, Prupe.1G388500, Prupe.1G410100, Prupe.1G427300, Prupe.1G537700, Prupe.1G538200, Prupe.2G073800, Prupe.2G074300, Prupe.2G086300,…
GO:0008171	MF	O-methyltransferase activity	7.73286e-08	6.66744e-06	16.3752	22	Prupe.1G227100, Prupe.2G107200, Prupe.2G199400, Prupe.2G199600, Prupe.2G199800, Prupe.3G118900, Prupe.3G119100, Prupe.3G119700, Prupe.3G119800, Prupe.3G120200, Prupe.3G120400, Prupe.3G129000, Prupe.3G129200, Prupe.3G129600, Prupe.3G129800, Prupe.3G235500, Prupe.7G214300, Prupe.8G171000, Prupe.8G171100, Prupe.8G171400, Prupe.8G171900, Prupe.8G172000
GO:0000079	BP	regulation of cyclin-dependent protein serine/threonine kinase activity	1.12862e-07	9.21901e-06	15.9971	21	Prupe.1G335600, Prupe.1G338000, Prupe.1G428100, Prupe.1G430500, Prupe.1G467200, Prupe.1G491700, Prupe.2G136400, Prupe.2G271100, Prupe.3G228000, Prupe.4G034400, Prupe.4G130400, Prupe.4G269600, Prupe.6G021200, Prupe.6G021300, Prupe.6G140600, Prupe.6G162800, Prupe.7G180800, Prupe.8G131900, Prupe.8G137700, Prupe.8G146700, Prupe.8G177900
GO:0016538	MF	cyclin-dependent protein serine/threonine kinase regulator activity	1.3333e-07	1.03464e-05	15.8304	18	Prupe.1G335600, Prupe.1G338000, Prupe.1G428100, Prupe.1G430500, Prupe.1G467200, Prupe.1G491700, Prupe.3G228000, Prupe.4G034400, Prupe.4G130400, Prupe.4G269600, Prupe.6G021200, Prupe.6G021300, Prupe.6G162800, Prupe.7G180800, Prupe.8G131900, Prupe.8G137700, Prupe.8G146700, Prupe.8G177900
GO:0046274	BP	lignin catabolic process	2.28197e-07	1.58523e-05	15.2931	16	Prupe.5G231100, Prupe.6G061300, Prupe.6G072100, Prupe.6G089100, Prupe.6G089300, Prupe.6G177700, Prupe.6G257700, Prupe.6G267700, Prupe.6G271500, Prupe.7G156500, Prupe.8G046800, Prupe.8G047500, Prupe.8G047900, Prupe.8G095000, Prupe.8G095400, Prupe.8G097000
GO:0004674	MF	protein serine/threonine kinase activity	2.34925e-07	1.58523e-05	15.264	131	Prupe.1G074000, Prupe.1G083300, Prupe.1G145600, Prupe.1G168400, Prupe.1G244900, Prupe.1G336000, Prupe.1G427400, Prupe.1G429700, Prupe.1G429800, Prupe.1G443900, Prupe.1G444700, Prupe.1G452900, Prupe.1G469200, Prupe.1G474000, Prupe.1G481600, Prupe.1G502100, Prupe.1G505700, Prupe.1G576200, Prupe.2G004700, Prupe.2G048700, Prupe.2G048900, Prupe.2G087300, Prupe.2G088400, Prupe.2G093000, Prupe.2G116000,…
GO:0052716	MF	hydroquinone:oxygen oxidoreductase activity	2.28197e-07	1.58523e-05	15.2931	16	Prupe.5G231100, Prupe.6G061300, Prupe.6G072100, Prupe.6G089100, Prupe.6G089300, Prupe.6G177700, Prupe.6G257700, Prupe.6G267700, Prupe.6G271500, Prupe.7G156500, Prupe.8G046800, Prupe.8G047500, Prupe.8G047900, Prupe.8G095000, Prupe.8G095400, Prupe.8G097000
GO:0005507	MF	copper ion binding	2.63719e-07	1.70538e-05	15.1484	28	Prupe.1G011900, Prupe.1G012000, Prupe.1G012100, Prupe.1G357100, Prupe.3G094600, Prupe.4G018800, Prupe.4G131900, Prupe.5G075700, Prupe.5G078700, Prupe.5G231100, Prupe.6G061300, Prupe.6G072100, Prupe.6G089100, Prupe.6G089300, Prupe.6G112800, Prupe.6G155100, Prupe.6G177700, Prupe.6G257700, Prupe.6G267700, Prupe.6G271500, Prupe.7G140500, Prupe.7G156500, Prupe.8G046800, Prupe.8G047500, Prupe.8G047900,…
GO:0030247	MF	polysaccharide binding	3.69053e-07	2.29108e-05	14.8123	37	Prupe.1G319100, Prupe.2G048800, Prupe.2G087100, Prupe.2G087800, Prupe.2G088400, Prupe.2G089000, Prupe.2G092500, Prupe.2G093000, Prupe.2G093300, Prupe.2G093600, Prupe.2G093700, Prupe.2G103300, Prupe.2G103400, Prupe.2G312200, Prupe.3G145600, Prupe.3G145800, Prupe.3G146600, Prupe.3G181200, Prupe.3G181400, Prupe.3G226000, Prupe.3G226300, Prupe.3G226700, Prupe.4G017500, Prupe.4G093000, Prupe.4G093300,…
GO:0019438	BP	aromatic compound biosynthetic process	4.41978e-07	2.63827e-05	14.632	18	Prupe.2G199400, Prupe.2G199600, Prupe.2G199800, Prupe.3G118900, Prupe.3G119100, Prupe.3G119700, Prupe.3G119800, Prupe.3G120400, Prupe.3G129000, Prupe.3G129200, Prupe.3G129600, Prupe.3G129800, Prupe.3G235500, Prupe.8G171000, Prupe.8G171100, Prupe.8G171400, Prupe.8G171900, Prupe.8G172000
GO:0000307	CC	cyclin-dependent protein kinase holoenzyme complex	7.05413e-07	4.05482e-05	14.1645	18	Prupe.1G335600, Prupe.1G338000, Prupe.1G428100, Prupe.1G430500, Prupe.1G467200, Prupe.1G491700, Prupe.3G228000, Prupe.4G034400, Prupe.4G130400, Prupe.4G269600, Prupe.5G003700, Prupe.6G021200, Prupe.6G021300, Prupe.7G180800, Prupe.8G131900, Prupe.8G137700, Prupe.8G146700, Prupe.8G177900
GO:0048544	BP	recognition of pollen	7.46553e-07	4.13804e-05	14.1078	27	Prupe.1G336000, Prupe.1G429700, Prupe.1G429800, Prupe.1G502100, Prupe.3G131100, Prupe.3G141400, Prupe.3G224900, Prupe.3G226000, Prupe.3G226300, Prupe.3G226600, Prupe.3G226700, Prupe.4G031200, Prupe.4G142300, Prupe.4G142400, Prupe.4G193200, Prupe.4G194900, Prupe.4G195400, Prupe.4G195500, Prupe.4G251300, Prupe.6G017000, Prupe.6G017200, Prupe.6G017300, Prupe.6G017400, Prupe.6G165500, Prupe.6G263000,…
GO:0038023	MF	signaling receptor activity	7.75609e-07	4.15085e-05	14.0696	28	Prupe.1G127200, Prupe.1G127300, Prupe.1G127400, Prupe.1G127500, Prupe.1G127700, Prupe.1G127800, Prupe.1G127900, Prupe.1G128400, Prupe.1G128700, Prupe.1G129000, Prupe.1G258100, Prupe.1G399500, Prupe.1G399800, Prupe.1G400000, Prupe.1G400600, Prupe.1G412700, Prupe.1G446400, Prupe.2G043500, Prupe.2G105400, Prupe.2G105700, Prupe.4G056600, Prupe.4G171700, Prupe.4G171800, Prupe.4G171900, Prupe.6G094400,…
GO:0034220	BP	ion transmembrane transport	8.89727e-07	4.60286e-05	13.9324	32	Prupe.1G162800, Prupe.1G399500, Prupe.1G399800, Prupe.1G400000, Prupe.1G400600, Prupe.1G412700, Prupe.1G457900, Prupe.1G472600, Prupe.2G043500, Prupe.2G105300, Prupe.2G105400, Prupe.2G105700, Prupe.2G222500, Prupe.3G099200, Prupe.3G231900, Prupe.3G259100, Prupe.4G056600, Prupe.4G086300, Prupe.4G092800, Prupe.4G109500, Prupe.4G171700, Prupe.4G171800, Prupe.4G171900, Prupe.4G191200, Prupe.5G024400,…
GO:0005576	CC	extracellular region	1.11363e-06	5.57533e-05	13.7079	126	Prupe.1G066500, Prupe.1G091300, Prupe.1G091400, Prupe.1G110100, Prupe.1G169700, Prupe.1G208600, Prupe.1G251200, Prupe.1G275400, Prupe.1G348100, Prupe.1G348300, Prupe.1G361900, Prupe.1G372800, Prupe.1G383700, Prupe.1G420000, Prupe.1G441000, Prupe.1G503200, Prupe.1G513200, Prupe.1G536700, Prupe.1G538400, Prupe.1G566900, Prupe.2G077100, Prupe.2G092300, Prupe.2G092900, Prupe.2G097700, Prupe.2G181400,…
GO:0048046	CC	apoplast	1.52112e-06	7.15386e-05	13.3961	48	Prupe.1G169700, Prupe.1G372800, Prupe.1G435600, Prupe.2G077100, Prupe.3G041700, Prupe.3G215600, Prupe.3G223200, Prupe.4G025600, Prupe.4G189300, Prupe.4G279500, Prupe.5G111100, Prupe.5G111300, Prupe.5G182600, Prupe.5G231100, Prupe.5G240700, Prupe.6G010400, Prupe.6G022400, Prupe.6G061300, Prupe.6G072100, Prupe.6G089100, Prupe.6G089300, Prupe.6G110300, Prupe.6G112800, Prupe.6G177700, Prupe.6G257700,…
GO:0005524	MF	ATP binding	1.5006e-06	7.15386e-05	13.4096	306	Prupe.1G023000, Prupe.1G023400, Prupe.1G074000, Prupe.1G078700, Prupe.1G083300, Prupe.1G086500, Prupe.1G104300, Prupe.1G104400, Prupe.1G134300, Prupe.1G139900, Prupe.1G145600, Prupe.1G157800, Prupe.1G168400, Prupe.1G177000, Prupe.1G236100, Prupe.1G269800, Prupe.1G302500, Prupe.1G314900, Prupe.1G315100, Prupe.1G315400, Prupe.1G336000, Prupe.1G343600, Prupe.1G347900, Prupe.1G368500, Prupe.1G419000,…
GO:0042626	MF	ATPase-coupled transmembrane transporter activity	2.50764e-06	0.000114466	12.8962	26	Prupe.1G104300, Prupe.1G104400, Prupe.1G236100, Prupe.1G302500, Prupe.1G471400, Prupe.2G303100, Prupe.2G305600, Prupe.3G051600, Prupe.3G051700, Prupe.3G059900, Prupe.3G060000, Prupe.4G186700, Prupe.4G235300, Prupe.4G272400, Prupe.5G112700, Prupe.5G229600, Prupe.6G121200, Prupe.6G121800, Prupe.6G234500, Prupe.6G306100, Prupe.7G056400, Prupe.7G235300, Prupe.8G022900, Prupe.I000500, Prupe.I000600, P…
GO:0008017	MF	microtubule binding	4.2431e-06	0.000188151	12.3702	28	Prupe.1G063300, Prupe.1G135600, Prupe.1G226800, Prupe.1G262400, Prupe.1G333900, Prupe.1G419600, Prupe.1G532000, Prupe.2G040000, Prupe.2G138600, Prupe.2G188500, Prupe.3G140300, Prupe.3G257100, Prupe.4G000100, Prupe.4G180200, Prupe.4G184200, Prupe.4G231600, Prupe.5G181300, Prupe.5G214600, Prupe.5G224200, Prupe.6G149000, Prupe.6G229300, Prupe.6G330300, Prupe.7G015100, Prupe.7G033200, Prupe.7G055800,…
GO:0016787	MF	hydrolase activity	8.65994e-06	0.00037334	11.6568	246	Prupe.1G018600, Prupe.1G018700, Prupe.1G110100, Prupe.1G134300, Prupe.1G149500, Prupe.1G155100, Prupe.1G155200, Prupe.1G161700, Prupe.1G161800, Prupe.1G169700, Prupe.1G178400, Prupe.1G208600, Prupe.1G237400, Prupe.1G246400, Prupe.1G251200, Prupe.1G263400, Prupe.1G275400, Prupe.1G294500, Prupe.1G295500, Prupe.1G302900, Prupe.1G303000, Prupe.1G309900, Prupe.1G316200, Prupe.1G331000, Prupe.1G332500,…
GO:0080043	MF	quercetin 3-O-glucosyltransferase activity	1.31949e-05	0.000511963	11.2357	27	Prupe.1G169200, Prupe.1G519500, Prupe.1G519600, Prupe.1G519700, Prupe.1G520300, Prupe.1G552100, Prupe.2G243600, Prupe.3G188500, Prupe.3G189100, Prupe.3G189500, Prupe.3G189700, Prupe.3G190400, Prupe.3G190500, Prupe.4G236800, Prupe.4G237300, Prupe.6G007700, Prupe.6G008300, Prupe.6G008400, Prupe.6G189900, Prupe.6G190100, Prupe.6G190300, Prupe.6G190600, Prupe.8G063400, Prupe.8G135700, Prupe.8G150700,…
GO:0080044	MF	quercetin 7-O-glucosyltransferase activity	1.31949e-05	0.000511963	11.2357	27	Prupe.1G169200, Prupe.1G519500, Prupe.1G519600, Prupe.1G519700, Prupe.1G520300, Prupe.1G552100, Prupe.2G243600, Prupe.3G188500, Prupe.3G189100, Prupe.3G189500, Prupe.3G189700, Prupe.3G190400, Prupe.3G190500, Prupe.4G236800, Prupe.4G237300, Prupe.6G007700, Prupe.6G008300, Prupe.6G008400, Prupe.6G189900, Prupe.6G190100, Prupe.6G190300, Prupe.6G190600, Prupe.8G063400, Prupe.8G135700, Prupe.8G150700,…
GO:0004364	MF	glutathione transferase activity	1.30486e-05	0.000511963	11.2468	24	Prupe.1G054900, Prupe.1G055000, Prupe.1G056100, Prupe.1G526000, Prupe.4G146000, Prupe.4G146100, Prupe.4G146200, Prupe.4G146800, Prupe.4G147000, Prupe.4G147100, Prupe.4G147200, Prupe.4G147300, Prupe.5G191500, Prupe.5G192600, Prupe.5G192700, Prupe.5G192800, Prupe.5G228100, Prupe.6G040700, Prupe.8G210200, Prupe.8G210300, Prupe.8G210400, Prupe.8G210500, Prupe.8G210600, Prupe.8G210700
GO:0051753	MF	mannan synthase activity	1.27046e-05	0.000511963	11.2735	11	Prupe.1G033700, Prupe.1G033900, Prupe.2G089900, Prupe.2G090000, Prupe.3G214200, Prupe.5G027700, Prupe.6G024900, Prupe.6G025000, Prupe.6G025100, Prupe.6G118300, Prupe.7G119100
GO:0004970	MF	ionotropic glutamate receptor activity	1.45185e-05	0.000549577	11.1401	15	Prupe.1G399500, Prupe.1G399800, Prupe.1G400000, Prupe.1G400600, Prupe.1G412700, Prupe.2G043500, Prupe.2G105300, Prupe.2G105400, Prupe.2G105700, Prupe.4G056600, Prupe.4G171700, Prupe.4G171800, Prupe.4G171900, Prupe.7G106900, Prupe.8G180400
GO:0020037	MF	heme binding	1.85598e-05	0.000685828	10.8945	88	Prupe.1G229700, Prupe.1G230500, Prupe.1G291500, Prupe.1G291800, Prupe.1G292400, Prupe.1G292500, Prupe.1G296300, Prupe.1G296600, Prupe.1G296900, Prupe.1G381900, Prupe.1G386800, Prupe.1G386900, Prupe.1G387000, Prupe.1G387100, Prupe.1G387200, Prupe.1G387300, Prupe.1G387500, Prupe.1G388500, Prupe.1G410100, Prupe.1G427300, Prupe.1G428400, Prupe.1G537700, Prupe.1G538200, Prupe.2G073800, Prupe.2G074300,…
GO:0008757	MF	S-adenosylmethionine-dependent methyltransferase activity	1.96275e-05	0.000708415	10.8386	26	Prupe.1G227100, Prupe.1G375700, Prupe.1G375800, Prupe.2G107200, Prupe.2G199400, Prupe.2G199600, Prupe.2G199800, Prupe.3G118900, Prupe.3G119100, Prupe.3G119700, Prupe.3G119800, Prupe.3G120400, Prupe.3G129000, Prupe.3G129200, Prupe.3G129600, Prupe.3G129800, Prupe.3G235500, Prupe.5G228500, Prupe.5G228700, Prupe.7G158400, Prupe.7G214300, Prupe.8G171000, Prupe.8G171100, Prupe.8G171400, Prupe.8G171900,…
GO:0015276	MF	ligand-gated ion channel activity	2.0264e-05	0.000714766	10.8067	15	Prupe.1G399500, Prupe.1G399800, Prupe.1G400000, Prupe.1G400600, Prupe.1G412700, Prupe.2G043500, Prupe.2G105300, Prupe.2G105400, Prupe.2G105700, Prupe.4G056600, Prupe.4G171700, Prupe.4G171800, Prupe.4G171900, Prupe.7G106900, Prupe.8G180400
GO:0005506	MF	iron ion binding	2.40085e-05	0.000815799	10.6371	78	Prupe.1G229700, Prupe.1G230500, Prupe.1G291500, Prupe.1G291800, Prupe.1G292400, Prupe.1G292500, Prupe.1G296300, Prupe.1G296600, Prupe.1G296900, Prupe.1G343000, Prupe.1G381900, Prupe.1G386800, Prupe.1G386900, Prupe.1G387000, Prupe.1G387100, Prupe.1G387200, Prupe.1G387300, Prupe.1G387500, Prupe.1G388500, Prupe.1G410100, Prupe.1G427300, Prupe.1G428400, Prupe.1G537700, Prupe.1G538200, Prupe.2G073800,…
GO:0016705	MF	oxidoreductase activity, acting on paired donors, with incorporation or reduction of molecular oxygen	2.41796e-05	0.000815799	10.63	71	Prupe.1G229700, Prupe.1G230500, Prupe.1G291500, Prupe.1G291800, Prupe.1G292400, Prupe.1G292500, Prupe.1G296300, Prupe.1G296600, Prupe.1G296900, Prupe.1G381900, Prupe.1G386800, Prupe.1G386900, Prupe.1G387000, Prupe.1G387100, Prupe.1G387200, Prupe.1G387300, Prupe.1G387500, Prupe.1G388500, Prupe.1G410100, Prupe.1G427300, Prupe.1G428400, Prupe.1G537700, Prupe.1G538200, Prupe.2G073800, Prupe.2G074300,…
GO:0016998	BP	cell wall macromolecule catabolic process	2.80027e-05	0.000924684	10.4832	9	Prupe.1G080500, Prupe.1G080600, Prupe.1G080700, Prupe.1G122900, Prupe.1G204000, Prupe.1G204700, Prupe.1G205400, Prupe.7G128000, Prupe.8G174900
GO:0009607	BP	response to biotic stimulus	2.98223e-05	0.000964256	10.4203	24	Prupe.1G091300, Prupe.1G091400, Prupe.1G127200, Prupe.1G127300, Prupe.1G127400, Prupe.1G127500, Prupe.1G127700, Prupe.1G127800, Prupe.1G127900, Prupe.1G128400, Prupe.1G128700, Prupe.1G129000, Prupe.1G258100, Prupe.1G327400, Prupe.1G327500, Prupe.1G327600, Prupe.1G328100, Prupe.1G328200, Prupe.1G328800, Prupe.6G094400, Prupe.6G120700, Prupe.6G239200, Prupe.7G271400, Prupe.8G265500
GO:0005886	CC	plasma membrane	7.34991e-05	0.00232797	9.51824	208	Prupe.1G019400, Prupe.1G033700, Prupe.1G033900, Prupe.1G098400, Prupe.1G141500, Prupe.1G155600, Prupe.1G157800, Prupe.1G177000, Prupe.1G218800, Prupe.1G233800, Prupe.1G249000, Prupe.1G257200, Prupe.1G257300, Prupe.1G257500, Prupe.1G269800, Prupe.1G278700, Prupe.1G323600, Prupe.1G334800, Prupe.1G346200, Prupe.1G356000, Prupe.1G384600, Prupe.1G388700, Prupe.1G399500, Prupe.1G399800, Prupe.1G400000,…
GO:0000325	CC	plant-type vacuole	0.000156057	0.004844	8.76529	9	Prupe.1G236100, Prupe.2G305600, Prupe.3G051600, Prupe.3G051700, Prupe.4G235300, Prupe.5G112700, Prupe.I000500, Prupe.I000600, Prupe.I000700
GO:0016788	MF	hydrolase activity, acting on ester bonds	0.000183773	0.00559246	8.60181	34	Prupe.1G081200, Prupe.1G116100, Prupe.1G246600, Prupe.1G246700, Prupe.1G361900, Prupe.1G362100, Prupe.1G497400, Prupe.1G497600, Prupe.1G497700, Prupe.1G497900, Prupe.1G547400, Prupe.1G547600, Prupe.2G080100, Prupe.2G080800, Prupe.2G098600, Prupe.2G098700, Prupe.3G032600, Prupe.3G032700, Prupe.3G033300, Prupe.3G033500, Prupe.3G208200, Prupe.3G208300, Prupe.4G058900, Prupe.4G059000, Prupe.4G071000,…
GO:0006749	BP	glutathione metabolic process	0.000213647	0.00637655	8.45118	24	Prupe.1G054900, Prupe.1G055000, Prupe.1G056100, Prupe.1G526000, Prupe.4G146000, Prupe.4G146100, Prupe.4G146200, Prupe.4G146800, Prupe.4G147000, Prupe.4G147100, Prupe.4G147200, Prupe.4G147300, Prupe.5G191500, Prupe.5G192600, Prupe.5G192700, Prupe.5G192800, Prupe.5G228100, Prupe.6G040700, Prupe.8G210200, Prupe.8G210300, Prupe.8G210400, Prupe.8G210500, Prupe.8G210600, Prupe.8G210700
GO:0051301	BP	cell division	0.00027015	0.00791081	8.21653	24	Prupe.1G335600, Prupe.1G338000, Prupe.1G428100, Prupe.1G430500, Prupe.1G467200, Prupe.1G491700, Prupe.2G138600, Prupe.3G017700, Prupe.3G228000, Prupe.3G261900, Prupe.4G034400, Prupe.4G099600, Prupe.4G130400, Prupe.4G167100, Prupe.4G269600, Prupe.6G021200, Prupe.6G021300, Prupe.6G162800, Prupe.6G229300, Prupe.7G180800, Prupe.8G131900, Prupe.8G137700, Prupe.8G146700, Prupe.8G177900
GO:0016301	MF	kinase activity	0.000292344	0.0084022	8.13758	136	Prupe.1G074000, Prupe.1G083300, Prupe.1G145600, Prupe.1G168400, Prupe.1G336000, Prupe.1G427400, Prupe.1G429700, Prupe.1G429800, Prupe.1G443900, Prupe.1G444700, Prupe.1G452900, Prupe.1G469200, Prupe.1G489100, Prupe.1G502100, Prupe.1G505700, Prupe.1G556500, Prupe.1G576200, Prupe.2G004700, Prupe.2G037500, Prupe.2G048700, Prupe.2G048900, Prupe.2G087100, Prupe.2G087200, Prupe.2G087300, Prupe.2G087800,…
GO:0098542	BP	defense response to other organism	0.000299117	0.00844054	8.11467	11	Prupe.1G386800, Prupe.1G386900, Prupe.1G387000, Prupe.1G387100, Prupe.1G387200, Prupe.1G387500, Prupe.1G427300, Prupe.1G537700, Prupe.1G538200, Prupe.3G064700, Prupe.3G066200
GO:0005975	BP	carbohydrate metabolic process	0.000329316	0.00912676	8.01849	95	Prupe.1G080500, Prupe.1G080600, Prupe.1G080700, Prupe.1G110100, Prupe.1G122900, Prupe.1G164800, Prupe.1G169700, Prupe.1G204700, Prupe.1G205400, Prupe.1G251200, Prupe.1G283400, Prupe.1G309900, Prupe.1G331000, Prupe.1G372800, Prupe.1G380300, Prupe.1G435600, Prupe.1G513200, Prupe.1G536700, Prupe.1G538400, Prupe.2G005100, Prupe.2G092300, Prupe.2G092900, Prupe.2G154800, Prupe.2G175100, Prupe.2G181400,…
GO:0016320	BP	endoplasmic reticulum membrane fusion	0.000339876	0.00925417	7.98693	5	Prupe.3G049700, Prupe.4G106500, Prupe.4G106600, Prupe.4G106700, Prupe.4G106900
GO:0007049	BP	cell cycle	0.000358201	0.00958498	7.93442	24	Prupe.1G335600, Prupe.1G338000, Prupe.1G428100, Prupe.1G430500, Prupe.1G467200, Prupe.1G491700, Prupe.3G017700, Prupe.3G228000, Prupe.3G261900, Prupe.4G034400, Prupe.4G099600, Prupe.4G130400, Prupe.4G167100, Prupe.4G269600, Prupe.6G021200, Prupe.6G021300, Prupe.6G139700, Prupe.6G162800, Prupe.6G229300, Prupe.7G180800, Prupe.8G131900, Prupe.8G137700, Prupe.8G146700, Prupe.8G177900
GO:0106310	#N/A	#N/A	0.00039544	0.0102287	7.83551	33	Prupe.1G336000, Prupe.1G429700, Prupe.1G429800, Prupe.1G443900, Prupe.1G481600, Prupe.1G502100, Prupe.2G004700, Prupe.3G131100, Prupe.3G141400, Prupe.3G224900, Prupe.3G226600, Prupe.4G031200, Prupe.4G104500, Prupe.4G135600, Prupe.4G142400, Prupe.4G193200, Prupe.4G194900, Prupe.4G195400, Prupe.4G195500, Prupe.4G251300, Prupe.6G017000, Prupe.6G017200, Prupe.6G017300, Prupe.6G017400, Prupe.6G020700,…
GO:0106311	#N/A	#N/A	0.00039544	0.0102287	7.83551	33	Prupe.1G336000, Prupe.1G429700, Prupe.1G429800, Prupe.1G443900, Prupe.1G481600, Prupe.1G502100, Prupe.2G004700, Prupe.3G131100, Prupe.3G141400, Prupe.3G224900, Prupe.3G226600, Prupe.4G031200, Prupe.4G104500, Prupe.4G135600, Prupe.4G142400, Prupe.4G193200, Prupe.4G194900, Prupe.4G195400, Prupe.4G195500, Prupe.4G251300, Prupe.6G017000, Prupe.6G017200, Prupe.6G017300, Prupe.6G017400, Prupe.6G020700,…
GO:0050660	MF	flavin adenine dinucleotide binding	0.000558283	0.0139751	7.49064	31	Prupe.1G007400, Prupe.1G032800, Prupe.1G092900, Prupe.1G093600, Prupe.1G093800, Prupe.1G171200, Prupe.1G345300, Prupe.1G450800, Prupe.1G468500, Prupe.2G072100, Prupe.3G049600, Prupe.4G097000, Prupe.4G098500, Prupe.4G099200, Prupe.4G099500, Prupe.4G157300, Prupe.4G189300, Prupe.4G230400, Prupe.5G089100, Prupe.5G199900, Prupe.6G181800, Prupe.6G216100, Prupe.7G067100, Prupe.7G193500, Prupe.7G208400,…
GO:0008422	MF	beta-glucosidase activity	0.000554076	0.0139751	7.49821	20	Prupe.2G005100, Prupe.2G092300, Prupe.2G092900, Prupe.2G198000, Prupe.2G198100, Prupe.3G111000, Prupe.4G186400, Prupe.4G186500, Prupe.6G018800, Prupe.6G019000, Prupe.6G019100, Prupe.6G134900, Prupe.6G136300, Prupe.6G136400, Prupe.6G136500, Prupe.6G136700, Prupe.6G156300, Prupe.6G156400, Prupe.7G083700, Prupe.8G165700
GO:0030245	BP	cellulose catabolic process	0.000599929	0.0145483	7.4187	9	Prupe.1G331000, Prupe.3G211500, Prupe.4G221700, Prupe.5G118000, Prupe.5G131300, Prupe.7G167300, Prupe.8G005900, Prupe.8G085400, Prupe.8G264200
GO:0008810	MF	cellulase activity	0.000599929	0.0145483	7.4187	9	Prupe.1G331000, Prupe.3G211500, Prupe.4G221700, Prupe.5G118000, Prupe.5G131300, Prupe.7G167300, Prupe.8G005900, Prupe.8G085400, Prupe.8G264200
GO:0046658	CC	anchored component of plasma membrane	0.000660061	0.0157602	7.32318	39	Prupe.1G156200, Prupe.1G185400, Prupe.1G380300, Prupe.1G394200, Prupe.1G562300, Prupe.2G133000, Prupe.2G147700, Prupe.2G314200, Prupe.3G016900, Prupe.3G062100, Prupe.3G086200, Prupe.3G099600, Prupe.3G112300, Prupe.3G184100, Prupe.3G210700, Prupe.3G250400, Prupe.3G261600, Prupe.3G304200, Prupe.4G026800, Prupe.4G081200, Prupe.4G129300, Prupe.4G205500, Prupe.4G255600, Prupe.4G270100, Prupe.5G008200,…
GO:0016413	MF	O-acetyltransferase activity	0.000688087	0.0161805	7.2816	15	Prupe.2G251900, Prupe.3G107900, Prupe.3G108000, Prupe.3G108300, Prupe.3G168700, Prupe.3G242400, Prupe.4G157100, Prupe.4G157200, Prupe.4G157500, Prupe.4G157600, Prupe.4G170300, Prupe.6G054900, Prupe.6G279700, Prupe.6G284100, Prupe.8G266500
GO:0010427	MF	abscisic acid binding	0.000865394	0.0200461	7.05233	14	Prupe.1G127200, Prupe.1G127300, Prupe.1G127400, Prupe.1G127500, Prupe.1G127700, Prupe.1G127800, Prupe.1G127900, Prupe.1G128400, Prupe.1G128700, Prupe.1G129000, Prupe.1G258100, Prupe.1G446400, Prupe.6G094400, Prupe.8G265500
GO:0009755	BP	hormone-mediated signaling pathway	0.000900871	0.0203125	7.01215	13	Prupe.1G513300, Prupe.1G515600, Prupe.1G516000, Prupe.1G579200, Prupe.2G064900, Prupe.2G146500, Prupe.2G146600, Prupe.3G116100, Prupe.4G121500, Prupe.8G217400, Prupe.8G217600, Prupe.8G226900, Prupe.8G227500
GO:0007018	BP	microtubule-based movement	0.000916154	0.0203125	6.99533	12	Prupe.1G419600, Prupe.1G532000, Prupe.4G184200, Prupe.4G231600, Prupe.5G214600, Prupe.5G224200, Prupe.6G149000, Prupe.6G330300, Prupe.7G055800, Prupe.8G087800, Prupe.8G115500, Prupe.8G265600
GO:0003777	MF	microtubule motor activity	0.000916154	0.0203125	6.99533	12	Prupe.1G419600, Prupe.1G532000, Prupe.4G184200, Prupe.4G231600, Prupe.5G214600, Prupe.5G224200, Prupe.6G149000, Prupe.6G330300, Prupe.7G055800, Prupe.8G087800, Prupe.8G115500, Prupe.8G265600
GO:0019762	BP	glucosinolate catabolic process	0.000988041	0.0215977	6.91979	14	Prupe.2G198000, Prupe.2G198100, Prupe.3G111000, Prupe.4G186500, Prupe.6G018800, Prupe.6G019000, Prupe.6G019100, Prupe.6G134900, Prupe.6G136300, Prupe.6G136400, Prupe.6G136500, Prupe.6G136700, Prupe.7G083700, Prupe.8G165700
GO:0016310	BP	phosphorylation	0.00108133	0.0233086	6.82956	137	Prupe.1G023000, Prupe.1G074000, Prupe.1G083300, Prupe.1G145600, Prupe.1G168400, Prupe.1G336000, Prupe.1G427400, Prupe.1G429700, Prupe.1G429800, Prupe.1G443900, Prupe.1G444700, Prupe.1G452900, Prupe.1G469200, Prupe.1G489100, Prupe.1G502100, Prupe.1G505700, Prupe.1G556500, Prupe.1G576200, Prupe.2G004700, Prupe.2G037500, Prupe.2G048700, Prupe.2G048900, Prupe.2G087100, Prupe.2G087200, Prupe.2G087300,…
GO:0097502	BP	mannosylation	0.00154572	0.0328625	6.47226	11	Prupe.1G033700, Prupe.1G033900, Prupe.2G089900, Prupe.2G090000, Prupe.3G214200, Prupe.5G027700, Prupe.6G024900, Prupe.6G025000, Prupe.6G025100, Prupe.6G118300, Prupe.7G119100
GO:0007165	BP	signal transduction	0.00168248	0.0352866	6.38749	50	Prupe.1G018600, Prupe.1G018700, Prupe.1G161700, Prupe.1G161800, Prupe.1G263400, Prupe.1G420000, Prupe.1G524000, Prupe.2G055700, Prupe.2G057100, Prupe.2G059400, Prupe.2G068400, Prupe.2G083200, Prupe.2G112700, Prupe.2G113100, Prupe.2G113200, Prupe.2G126900, Prupe.2G127000, Prupe.3G009700, Prupe.3G010100, Prupe.3G010200, Prupe.3G175800, Prupe.4G156500, Prupe.5G003700, Prupe.5G092500, Prupe.6G083100,…
GO:0080163	BP	regulation of protein serine/threonine phosphatase activity	0.00185597	0.0384062	6.28935	13	Prupe.1G127200, Prupe.1G127300, Prupe.1G127400, Prupe.1G127500, Prupe.1G127700, Prupe.1G127800, Prupe.1G127900, Prupe.1G128400, Prupe.1G128700, Prupe.1G129000, Prupe.1G446400, Prupe.6G094400, Prupe.8G265500
GO:0043086	BP	negative regulation of catalytic activity	0.00231071	0.0468493	6.0702	20	Prupe.1G178400, Prupe.1G529500, Prupe.2G278200, Prupe.2G278300, Prupe.2G279700, Prupe.2G279900, Prupe.2G310600, Prupe.5G048600, Prupe.5G048900, Prupe.5G076800, Prupe.6G036700, Prupe.6G197400, Prupe.6G318500, Prupe.7G072600, Prupe.7G190300, Prupe.7G190700, Prupe.7G193700, Prupe.8G261300, Prupe.8G263900, Prupe.8G264100
GO:0005618	CC	cell wall	0.00232435	0.0468493	6.06431	63	Prupe.1G012100, Prupe.1G060900, Prupe.1G096800, Prupe.1G096900, Prupe.1G097000, Prupe.1G110100, Prupe.1G169700, Prupe.1G178400, Prupe.1G208600, Prupe.1G239900, Prupe.1G251200, Prupe.1G372800, Prupe.1G529500, Prupe.1G565500, Prupe.2G077100, Prupe.2G152000, Prupe.2G175100, Prupe.2G278200, Prupe.2G278300, Prupe.2G296000, Prupe.2G310600, Prupe.3G005900, Prupe.3G041700, Prupe.3G185700, Prupe.3G223200,…
GO:0005216	MF	ion channel activity	0.00247829	0.0493117	6.00018	13	Prupe.1G162800, Prupe.1G457900, Prupe.1G472600, Prupe.2G222500, Prupe.3G099200, Prupe.3G231900, Prupe.3G259100, Prupe.4G092800, Prupe.4G109500, Prupe.4G191200, Prupe.5G162000, Prupe.8G097600, Prupe.8G097800
GO:0032515	BP	negative regulation of phosphoprotein phosphatase activity	0.0026525	0.0514585	5.93225	14	Prupe.1G127200, Prupe.1G127300, Prupe.1G127400, Prupe.1G127500, Prupe.1G127700, Prupe.1G127800, Prupe.1G127900, Prupe.1G128400, Prupe.1G128700, Prupe.1G129000, Prupe.1G258100, Prupe.1G446400, Prupe.6G094400, Prupe.8G265500
GO:0004864	MF	protein phosphatase inhibitor activity	0.0026525	0.0514585	5.93225	14	Prupe.1G127200, Prupe.1G127300, Prupe.1G127400, Prupe.1G127500, Prupe.1G127700, Prupe.1G127800, Prupe.1G127900, Prupe.1G128400, Prupe.1G128700, Prupe.1G129000, Prupe.1G258100, Prupe.1G446400, Prupe.6G094400, Prupe.8G265500
GO:0030244	BP	cellulose biosynthetic process	0.00274066	0.0525125	5.89955	9	Prupe.1G033700, Prupe.1G033900, Prupe.3G214200, Prupe.5G027700, Prupe.5G185500, Prupe.6G024900, Prupe.6G025000, Prupe.6G025100, Prupe.8G216900
GO:0006032	BP	chitin catabolic process	0.00328088	0.0606182	5.71964	8	Prupe.1G080500, Prupe.1G080600, Prupe.1G080700, Prupe.1G122900, Prupe.1G204000, Prupe.1G204700, Prupe.1G205400, Prupe.8G174900
GO:0003774	MF	motor activity	0.00326184	0.0606182	5.72546	13	Prupe.1G419600, Prupe.1G532000, Prupe.4G183100, Prupe.4G231600, Prupe.5G214600, Prupe.5G224200, Prupe.6G149000, Prupe.6G330300, Prupe.7G055800, Prupe.7G240100, Prupe.8G087800, Prupe.8G115500, Prupe.8G265600
GO:0004568	MF	chitinase activity	0.00322221	0.0606182	5.73769	10	Prupe.1G080500, Prupe.1G080600, Prupe.1G080700, Prupe.1G122900, Prupe.1G204000, Prupe.1G204700, Prupe.1G205400, Prupe.2G181400, Prupe.2G305200, Prupe.8G174900
GO:0009734	BP	auxin-activated signaling pathway	0.00358076	0.0646202	5.63218	29	Prupe.1G208300, Prupe.1G233800, Prupe.1G287400, Prupe.1G356000, Prupe.1G371500, Prupe.1G388700, Prupe.1G444800, Prupe.1G491000, Prupe.1G491100, Prupe.1G491300, Prupe.2G036500, Prupe.2G213000, Prupe.3G001800, Prupe.3G043400, Prupe.3G300900, Prupe.4G137000, Prupe.4G277700, Prupe.5G004300, Prupe.5G233100, Prupe.7G031400, Prupe.7G163600, Prupe.7G185200, Prupe.7G200100, Prupe.7G200200, Prupe.7G200300,…
GO:0010333	MF	terpene synthase activity	0.00354362	0.0646202	5.64261	13	Prupe.4G029900, Prupe.4G030400, Prupe.4G125500, Prupe.4G194300, Prupe.4G197900, Prupe.4G198200, Prupe.4G198500, Prupe.4G198700, Prupe.4G199000, Prupe.4G199200, Prupe.4G199300, Prupe.4G199500, Prupe.4G200100
GO:0004857	MF	enzyme inhibitor activity	0.00386082	0.0688735	5.55688	18	Prupe.1G178400, Prupe.1G529500, Prupe.2G278200, Prupe.2G278300, Prupe.2G279700, Prupe.2G279900, Prupe.2G310600, Prupe.5G048600, Prupe.5G048900, Prupe.5G076800, Prupe.6G197400, Prupe.6G318500, Prupe.7G190300, Prupe.7G190700, Prupe.7G193700, Prupe.8G261300, Prupe.8G263900, Prupe.8G264100
GO:0102210	MF	rhamnogalacturonan endolyase activity	0.00391578	0.0690601	5.54274	3	Prupe.1G536700, Prupe.1G538400, Prupe.6G208400
GO:0031347	BP	regulation of defense response	0.00596642	0.101182	5.12161	13	Prupe.1G331500, Prupe.3G037800, Prupe.3G098100, Prupe.3G135100, Prupe.3G135700, Prupe.3G155200, Prupe.3G155300, Prupe.4G082500, Prupe.4G144900, Prupe.4G145300, Prupe.4G202900, Prupe.4G203500, Prupe.4G203600
GO:0016104	BP	triterpenoid biosynthetic process	0.00606311	0.101182	5.10553	4	Prupe.3G026200, Prupe.3G026400, Prupe.3G026700, Prupe.3G026800
GO:0000250	MF	lanosterol synthase activity	0.00606311	0.101182	5.10553	4	Prupe.3G026200, Prupe.3G026400, Prupe.3G026700, Prupe.3G026800
GO:0042300	MF	beta-amyrin synthase activity	0.00606311	0.101182	5.10553	4	Prupe.3G026200, Prupe.3G026400, Prupe.3G026700, Prupe.3G026800
GO:0042277	MF	peptide binding	0.00586926	0.101182	5.13803	3	Prupe.1G457200, Prupe.1G457300, Prupe.3G044500
GO:0016760	MF	cellulose synthase (UDP-forming) activity	0.00652642	0.107755	5.0319	8	Prupe.1G033700, Prupe.1G033900, Prupe.3G214200, Prupe.5G027700, Prupe.6G024900, Prupe.6G025000, Prupe.6G025100, Prupe.8G216900
GO:0008061	MF	chitin binding	0.00684285	0.110626	4.98455	9	Prupe.1G080300, Prupe.1G080500, Prupe.1G080600, Prupe.1G080700, Prupe.1G122900, Prupe.1G204000, Prupe.1G204700, Prupe.1G205400, Prupe.8G174900
GO:0004867	MF	serine-type endopeptidase inhibitor activity	0.00679358	0.110626	4.99178	8	Prupe.1G032000, Prupe.1G032400, Prupe.1G032500, Prupe.1G032700, Prupe.1G552600, Prupe.1G552700, Prupe.I000200, Prupe.I000300
GO:0003854	MF	3-beta-hydroxy-delta5-steroid dehydrogenase activity	0.00712133	0.113941	4.94466	6	Prupe.1G063200, Prupe.2G021000, Prupe.2G021100, Prupe.2G185000, Prupe.3G241700, Prupe.I003000
GO:0009833	BP	plant-type primary cell wall biogenesis	0.00744247	0.117864	4.90055	8	Prupe.1G033700, Prupe.1G033900, Prupe.3G214200, Prupe.5G027700, Prupe.6G024900, Prupe.6G025000, Prupe.6G025100, Prupe.8G216900
GO:2000031	BP	regulation of salicylic acid mediated signaling pathway	0.00768559	0.118099	4.86841	10	Prupe.3G135100, Prupe.3G135700, Prupe.3G155200, Prupe.3G155300, Prupe.4G144900, Prupe.4G145300, Prupe.4G202900, Prupe.4G203500, Prupe.4G203600, Prupe.4G276500
GO:0000272	BP	polysaccharide catabolic process	0.00764534	0.118099	4.87366	9	Prupe.1G331000, Prupe.3G211500, Prupe.4G221700, Prupe.5G118000, Prupe.5G131300, Prupe.7G167300, Prupe.8G005900, Prupe.8G085400, Prupe.8G264200
GO:0043171	BP	peptide catabolic process	0.00767395	0.118099	4.86992	3	Prupe.1G457200, Prupe.1G457300, Prupe.3G044500
GO:0046593	MF	mandelonitrile lyase activity	0.00872754	0.132795	4.74127	8	Prupe.1G007400, Prupe.1G092900, Prupe.1G093600, Prupe.1G093800, Prupe.3G049600, Prupe.5G089100, Prupe.8G215200, Prupe.8G219700
GO:0009308	BP	amine metabolic process	0.00977837	0.140519	4.62758	4	Prupe.1G011900, Prupe.1G012000, Prupe.1G012100, Prupe.5G078700
GO:0008131	MF	primary amine oxidase activity	0.00977837	0.140519	4.62758	4	Prupe.1G011900, Prupe.1G012000, Prupe.1G012100, Prupe.5G078700
GO:0052593	MF	tryptamine:oxygen oxidoreductase (deaminating) activity	0.00977837	0.140519	4.62758	4	Prupe.1G011900, Prupe.1G012000, Prupe.1G012100, Prupe.5G078700
GO:0052594	MF	aminoacetone:oxygen oxidoreductase(deaminating) activity	0.00977837	0.140519	4.62758	4	Prupe.1G011900, Prupe.1G012000, Prupe.1G012100, Prupe.5G078700
GO:0052595	MF	aliphatic-amine oxidase activity	0.00977837	0.140519	4.62758	4	Prupe.1G011900, Prupe.1G012000, Prupe.1G012100, Prupe.5G078700
GO:0052596	MF	phenethylamine:oxygen oxidoreductase (deaminating) activity	0.00977837	0.140519	4.62758	4	Prupe.1G011900, Prupe.1G012000, Prupe.1G012100, Prupe.5G078700
GO:0051213	MF	dioxygenase activity	0.0100282	0.142787	4.60236	22	Prupe.1G448400, Prupe.1G449100, Prupe.1G467600, Prupe.1G468100, Prupe.1G468300, Prupe.1G502300, Prupe.1G502500, Prupe.1G502700, Prupe.2G005300, Prupe.3G006700, Prupe.4G080700, Prupe.4G262900, Prupe.4G263000, Prupe.4G263100, Prupe.4G264400, Prupe.5G086700, Prupe.6G055300, Prupe.6G324100, Prupe.6G324200, Prupe.6G324400, Prupe.8G011000, Prupe.I003900
GO:0000166	MF	nucleotide binding	0.0107406	0.15154	4.53372	217	Prupe.1G023000, Prupe.1G023400, Prupe.1G074000, Prupe.1G078700, Prupe.1G083300, Prupe.1G104300, Prupe.1G104400, Prupe.1G109200, Prupe.1G145600, Prupe.1G168400, Prupe.1G236100, Prupe.1G302500, Prupe.1G333900, Prupe.1G336000, Prupe.1G347900, Prupe.1G368500, Prupe.1G419600, Prupe.1G422500, Prupe.1G427400, Prupe.1G429700, Prupe.1G429800, Prupe.1G443900, Prupe.1G444700, Prupe.1G452900, Prupe.1G469200,…
GO:0055085	BP	transmembrane transport	0.0116505	0.162694	4.45241	121	Prupe.1G045600, Prupe.1G104300, Prupe.1G104400, Prupe.1G156300, Prupe.1G157000, Prupe.1G162800, Prupe.1G233800, Prupe.1G236100, Prupe.1G249000, Prupe.1G257200, Prupe.1G257300, Prupe.1G257500, Prupe.1G302500, Prupe.1G346200, Prupe.1G346300, Prupe.1G356000, Prupe.1G388700, Prupe.1G421500, Prupe.1G444800, Prupe.1G457900, Prupe.1G471400, Prupe.1G472600, Prupe.1G490100, Prupe.1G490200, Prupe.1G491000,…
GO:0009524	CC	phragmoplast	0.0117408	0.162694	4.44469	5	Prupe.1G226800, Prupe.1G281000, Prupe.3G140300, Prupe.6G229300, Prupe.7G000700
GO:0035336	BP	long-chain fatty-acyl-CoA metabolic process	0.0134916	0.178337	4.30569	3	Prupe.6G126600, Prupe.6G126800, Prupe.6G126900
GO:0009505	CC	plant-type cell wall	0.0135591	0.178337	4.3007	17	Prupe.1G208600, Prupe.1G372800, Prupe.1G472800, Prupe.1G513200, Prupe.2G296000, Prupe.4G021100, Prupe.4G056100, Prupe.4G276800, Prupe.6G101100, Prupe.6G303100, Prupe.6G303200, Prupe.7G097600, Prupe.7G163100, Prupe.7G217400, Prupe.8G038900, Prupe.8G216200, Prupe.8G270800
GO:0016747	MF	transferase activity, transferring acyl groups other than amino-acyl groups	0.0133161	0.178337	4.31878	32	Prupe.1G016700, Prupe.1G236600, Prupe.1G432300, Prupe.1G432400, Prupe.1G432500, Prupe.1G533000, Prupe.2G010800, Prupe.2G246800, Prupe.3G027900, Prupe.3G098400, Prupe.3G101400, Prupe.3G101600, Prupe.3G252800, Prupe.3G253500, Prupe.3G254200, Prupe.4G140700, Prupe.4G252100, Prupe.4G253000, Prupe.5G017900, Prupe.5G018100, Prupe.6G086800, Prupe.6G271700, Prupe.7G029300, Prupe.7G129900, Prupe.7G130100,…
GO:0016614	MF	oxidoreductase activity, acting on CH-OH group of donors	0.0131177	0.178337	4.33379	9	Prupe.1G007400, Prupe.1G092900, Prupe.1G093600, Prupe.1G093800, Prupe.3G029300, Prupe.3G049600, Prupe.5G089100, Prupe.8G215200, Prupe.8G219700
GO:0080019	MF	fatty-acyl-CoA reductase (alcohol-forming) activity	0.0134916	0.178337	4.30569	3	Prupe.6G126600, Prupe.6G126800, Prupe.6G126900
GO:0102965	MF	alcohol-forming fatty acyl-CoA reductase activity	0.0134916	0.178337	4.30569	3	Prupe.6G126600, Prupe.6G126800, Prupe.6G126900
GO:0010413	BP	glucuronoxylan metabolic process	0.0142205	0.185464	4.25307	2	Prupe.4G201700, Prupe.6G239800
GO:0006811	BP	ion transport	0.0149977	0.19397	4.19986	39	Prupe.1G023400, Prupe.1G162800, Prupe.1G399500, Prupe.1G399800, Prupe.1G400000, Prupe.1G400600, Prupe.1G412700, Prupe.1G457900, Prupe.1G472600, Prupe.2G026200, Prupe.2G043500, Prupe.2G105400, Prupe.2G105700, Prupe.2G128800, Prupe.2G222500, Prupe.3G052200, Prupe.3G099200, Prupe.3G192400, Prupe.3G231900, Prupe.3G259100, Prupe.4G056600, Prupe.4G086300, Prupe.4G092800, Prupe.4G109500, Prupe.4G117100,…
GO:0045735	MF	nutrient reservoir activity	0.0153662	0.197093	4.17559	16	Prupe.1G570800, Prupe.2G077100, Prupe.3G041700, Prupe.5G182600, Prupe.5G240700, Prupe.6G296600, Prupe.7G112300, Prupe.7G151000, Prupe.7G200100, Prupe.7G200200, Prupe.7G200300, Prupe.8G025600, Prupe.8G025800, Prupe.8G025900, Prupe.8G035700, Prupe.8G216700
GO:0052793	MF	pectin acetylesterase activity	0.0158038	0.201045	4.14751	4	Prupe.1G208600, Prupe.2G296000, Prupe.6G303100, Prupe.6G303200
GO:0009395	BP	phospholipid catabolic process	0.0167859	0.211802	4.08722	5	Prupe.1G480500, Prupe.2G098600, Prupe.2G098700, Prupe.3G051200, Prupe.7G243800
GO:0016798	MF	hydrolase activity, acting on glycosyl bonds	0.0176476	0.22088	4.03715	54	Prupe.1G110100, Prupe.1G169700, Prupe.1G251200, Prupe.1G309900, Prupe.1G331000, Prupe.1G372800, Prupe.1G380300, Prupe.1G435600, Prupe.1G513200, Prupe.2G005100, Prupe.2G092300, Prupe.2G092900, Prupe.2G175100, Prupe.2G181400, Prupe.2G277900, Prupe.2G305200, Prupe.2G314200, Prupe.3G005900, Prupe.3G009500, Prupe.3G016900, Prupe.3G048300, Prupe.3G086200, Prupe.3G210700, Prupe.3G211500, Prupe.3G223200,…
GO:0009611	BP	response to wounding	0.0183311	0.227599	3.99915	11	Prupe.1G032000, Prupe.1G032400, Prupe.1G032500, Prupe.1G032700, Prupe.1G331500, Prupe.3G037800, Prupe.3G098100, Prupe.4G082500, Prupe.5G086700, Prupe.I000200, Prupe.I000300
GO:0016887	MF	ATPase activity	0.0184931	0.227788	3.99036	45	Prupe.1G086500, Prupe.1G104300, Prupe.1G104400, Prupe.1G236100, Prupe.1G302500, Prupe.1G471400, Prupe.2G128800, Prupe.2G234200, Prupe.2G234300, Prupe.2G234400, Prupe.2G303100, Prupe.3G018700, Prupe.3G051600, Prupe.3G051700, Prupe.3G059900, Prupe.3G060000, Prupe.3G273900, Prupe.4G168100, Prupe.4G184200, Prupe.4G186700, Prupe.4G231600, Prupe.4G235300, Prupe.4G237600, Prupe.4G272400, Prupe.5G112700,…
GO:0005874	CC	microtubule	0.0187178	0.22874	3.97828	21	Prupe.1G063300, Prupe.1G226800, Prupe.1G262400, Prupe.1G390100, Prupe.1G419600, Prupe.3G140300, Prupe.3G257100, Prupe.3G269300, Prupe.4G183100, Prupe.4G184200, Prupe.4G231600, Prupe.5G099500, Prupe.5G181300, Prupe.5G214600, Prupe.5G224200, Prupe.6G149000, Prupe.6G212700, Prupe.6G229300, Prupe.6G330300, Prupe.7G240100, Prupe.8G087800
GO:0009738	BP	abscisic acid-activated signaling pathway	0.0199399	0.238858	3.91503	14	Prupe.1G127200, Prupe.1G127300, Prupe.1G127400, Prupe.1G127500, Prupe.1G127700, Prupe.1G127800, Prupe.1G127900, Prupe.1G128400, Prupe.1G128700, Prupe.1G129000, Prupe.1G258100, Prupe.1G446400, Prupe.6G094400, Prupe.8G265500
GO:0004190	MF	aspartic-type endopeptidase activity	0.0200075	0.238858	3.91165	19	Prupe.1G152100, Prupe.1G152200, Prupe.1G307100, Prupe.1G350500, Prupe.1G397600, Prupe.1G397700, Prupe.1G397900, Prupe.1G398100, Prupe.1G493500, Prupe.1G511100, Prupe.1G529800, Prupe.2G038800, Prupe.3G007600, Prupe.3G103900, Prupe.3G177100, Prupe.4G124800, Prupe.5G037200, Prupe.6G258100, Prupe.7G097600
GO:0016866	MF	intramolecular transferase activity	0.0198044	0.238858	3.92185	5	Prupe.3G026200, Prupe.3G026400, Prupe.3G026700, Prupe.3G026800, Prupe.3G249900
GO:0046983	MF	protein dimerization activity	0.0215827	0.255697	3.83586	52	Prupe.1G030500, Prupe.1G150700, Prupe.1G252600, Prupe.1G263800, Prupe.1G271700, Prupe.1G371300, Prupe.1G524500, Prupe.1G538700, Prupe.1G540400, Prupe.2G047700, Prupe.2G097200, Prupe.2G170100, Prupe.2G195300, Prupe.2G198800, Prupe.2G199400, Prupe.2G199600, Prupe.2G199800, Prupe.3G118900, Prupe.3G119100, Prupe.3G119700, Prupe.3G120400, Prupe.3G129000, Prupe.3G129200, Prupe.3G129600, Prupe.3G129800,…
GO:0009627	BP	systemic acquired resistance	0.0229214	0.269171	3.77568	6	Prupe.1G179900, Prupe.4G228100, Prupe.4G276500, Prupe.6G264700, Prupe.6G286000, Prupe.8G190500
GO:0009851	BP	auxin biosynthetic process	0.0230669	0.269171	3.76936	3	Prupe.1G371500, Prupe.2G036500, Prupe.7G163600
GO:0016829	MF	lyase activity	0.0234489	0.271587	3.75293	41	Prupe.1G007400, Prupe.1G060900, Prupe.1G092900, Prupe.1G093600, Prupe.1G093800, Prupe.1G239900, Prupe.1G275400, Prupe.1G339900, Prupe.1G536700, Prupe.1G538400, Prupe.1G565500, Prupe.3G016000, Prupe.3G049600, Prupe.4G029900, Prupe.4G030400, Prupe.4G086600, Prupe.4G087100, Prupe.4G125500, Prupe.4G194300, Prupe.4G197900, Prupe.4G198200, Prupe.4G198500, Prupe.4G198700, Prupe.4G199000, Prupe.4G199200,…
GO:0046148	BP	pigment biosynthetic process	0.0242741	0.277261	3.71835	3	Prupe.4G041400, Prupe.4G041700, Prupe.4G041900
GO:0010227	BP	floral organ abscission	0.0242961	0.277261	3.71744	3	Prupe.1G303500, Prupe.5G013700, Prupe.6G159700
GO:0071555	BP	cell wall organization	0.0249316	0.282436	3.69162	35	Prupe.1G033700, Prupe.1G033900, Prupe.1G110100, Prupe.1G169700, Prupe.1G208600, Prupe.1G251200, Prupe.1G278500, Prupe.2G278200, Prupe.2G296000, Prupe.3G005900, Prupe.3G214200, Prupe.3G223200, Prupe.3G265800, Prupe.4G025600, Prupe.4G167100, Prupe.4G201700, Prupe.4G261900, Prupe.5G027700, Prupe.5G105400, Prupe.5G195200, Prupe.6G014400, Prupe.6G024900, Prupe.6G025000, Prupe.6G025100, Prupe.6G042000,…
GO:0010088	BP	phloem development	0.025469	0.286434	3.67029	6	Prupe.1G028500, Prupe.1G028800, Prupe.1G241400, Prupe.1G241500, Prupe.1G241600, Prupe.5G162100
GO:0000976	MF	transcription regulatory region sequence-specific DNA binding	0.0264582	0.295419	3.63219	23	Prupe.1G260700, Prupe.1G274700, Prupe.1G378200, Prupe.2G195300, Prupe.2G280100, Prupe.3G042300, Prupe.3G143800, Prupe.3G267900, Prupe.4G053300, Prupe.5G087900, Prupe.5G126600, Prupe.5G130300, Prupe.5G130400, Prupe.5G130500, Prupe.5G130600, Prupe.5G167800, Prupe.5G174200, Prupe.6G196000, Prupe.7G201700, Prupe.7G201900, Prupe.7G245200, Prupe.7G247600, Prupe.8G087900
GO:0010315	BP	auxin efflux	0.0271483	0.300958	3.60644	4	Prupe.3G170800, Prupe.5G233100, Prupe.7G031400, Prupe.8G018200
GO:0071446	BP	cellular response to salicylic acid stimulus	0.0280231	0.308452	3.57473	9	Prupe.3G135100, Prupe.3G135700, Prupe.3G155200, Prupe.3G155300, Prupe.4G144900, Prupe.4G145300, Prupe.4G202900, Prupe.4G203500, Prupe.4G203600
GO:0010216	BP	maintenance of DNA methylation	0.028819	0.312776	3.54672	2	Prupe.5G140900, Prupe.8G202000
GO:0016616	MF	oxidoreductase activity, acting on the CH-OH group of donors, NAD or NADP as acceptor	0.0287764	0.312776	3.5482	26	Prupe.1G063200, Prupe.1G099500, Prupe.1G233400, Prupe.1G587500, Prupe.2G021000, Prupe.2G021100, Prupe.2G150200, Prupe.2G184900, Prupe.2G185000, Prupe.3G097600, Prupe.3G194000, Prupe.3G241700, Prupe.3G296200, Prupe.4G200500, Prupe.5G004800, Prupe.6G051200, Prupe.6G051300, Prupe.6G161800, Prupe.6G205400, Prupe.6G205900, Prupe.6G207300, Prupe.6G207900, Prupe.6G228800, Prupe.7G053500, Prupe.7G187000,…
GO:0042973	MF	glucan endo-1,3-beta-D-glucosidase activity	0.0299613	0.322916	3.50785	12	Prupe.1G380300, Prupe.2G314200, Prupe.3G016900, Prupe.3G086200, Prupe.3G210700, Prupe.4G081200, Prupe.4G255600, Prupe.5G008200, Prupe.6G222300, Prupe.7G051800, Prupe.7G052100, Prupe.7G189600
GO:0043565	MF	sequence-specific DNA binding	0.0309599	0.331378	3.47506	52	Prupe.1G114800, Prupe.1G252600, Prupe.1G269200, Prupe.1G304700, Prupe.1G313300, Prupe.1G378200, Prupe.1G393000, Prupe.1G393100, Prupe.1G407500, Prupe.1G433500, Prupe.1G447400, Prupe.1G523000, Prupe.1G540400, Prupe.2G127300, Prupe.2G194400, Prupe.2G212900, Prupe.2G259900, Prupe.2G264900, Prupe.2G265000, Prupe.3G002300, Prupe.3G006300, Prupe.3G009400, Prupe.3G015300, Prupe.3G060900, Prupe.3G098100,…
GO:0034440	BP	lipid oxidation	0.0334449	0.355524	3.39786	4	Prupe.2G005300, Prupe.6G324100, Prupe.6G324200, Prupe.6G324400
GO:0000390	BP	spliceosomal complex disassembly	0.0358063	0.373008	3.32963	4	Prupe.1G368500, Prupe.1G422500, Prupe.2G078200, Prupe.2G078300
GO:0003700	MF	DNA-binding transcription factor activity	0.0358031	0.373008	3.32972	90	Prupe.1G084900, Prupe.1G114800, Prupe.1G252600, Prupe.1G260700, Prupe.1G263800, Prupe.1G269200, Prupe.1G274700, Prupe.1G304700, Prupe.1G371300, Prupe.1G378200, Prupe.1G393000, Prupe.1G393100, Prupe.1G407500, Prupe.1G433500, Prupe.1G447400, Prupe.1G480400, Prupe.1G523000, Prupe.1G540400, Prupe.2G060200, Prupe.2G063800, Prupe.2G070300, Prupe.2G127300, Prupe.2G147000, Prupe.2G190200, Prupe.2G194400,…
GO:0004499	MF	N,N-dimethylaniline monooxygenase activity	0.0358107	0.373008	3.32951	5	Prupe.1G468500, Prupe.5G199900, Prupe.7G193500, Prupe.7G231200, Prupe.8G177000
GO:0046910	MF	pectinesterase inhibitor activity	0.0360778	0.373285	3.32208	11	Prupe.1G178400, Prupe.1G529500, Prupe.2G278200, Prupe.2G278300, Prupe.2G310600, Prupe.5G048600, Prupe.6G318500, Prupe.7G190300, Prupe.7G190700, Prupe.8G263900, Prupe.8G264100
GO:0046470	BP	phosphatidylcholine metabolic process	0.0364161	0.37429	3.31274	3	Prupe.1G480500, Prupe.3G051200, Prupe.7G243800
GO:0008152	BP	metabolic process	0.0395091	0.401911	3.23123	55	Prupe.1G110100, Prupe.1G169700, Prupe.1G251200, Prupe.1G309900, Prupe.1G331000, Prupe.1G372800, Prupe.1G380300, Prupe.1G435600, Prupe.1G513200, Prupe.2G005100, Prupe.2G092300, Prupe.2G092900, Prupe.2G175100, Prupe.2G181400, Prupe.2G277900, Prupe.2G305200, Prupe.2G314200, Prupe.3G005900, Prupe.3G009500, Prupe.3G016900, Prupe.3G048300, Prupe.3G086200, Prupe.3G210700, Prupe.3G211500, Prupe.3G223200,…
GO:0016042	BP	lipid catabolic process	0.0396214	0.401911	3.22839	12	Prupe.1G066500, Prupe.1G439500, Prupe.1G439700, Prupe.1G439800, Prupe.1G440100, Prupe.1G480500, Prupe.3G051200, Prupe.4G059100, Prupe.4G104000, Prupe.5G062500, Prupe.7G243800, Prupe.8G240600
GO:0009504	CC	cell plate	0.0416878	0.420127	3.17755	2	Prupe.4G180200, Prupe.7G000700
GO:0031110	BP	regulation of microtubule polymerization or depolymerization	0.0429957	0.430512	3.14666	2	Prupe.2G138600, Prupe.6G229300
GO:0010345	BP	suberin biosynthetic process	0.0433542	0.431319	3.13835	3	Prupe.6G126600, Prupe.6G126800, Prupe.6G126900
GO:0006694	BP	steroid biosynthetic process	0.0441258	0.436199	3.12071	6	Prupe.1G063200, Prupe.2G021000, Prupe.2G021100, Prupe.2G185000, Prupe.3G241700, Prupe.I003000
GO:0009877	BP	nodulation	0.0486649	0.472049	3.0228	2	Prupe.1G485400, Prupe.1G485600
GO:0005901	CC	caveola	0.0486649	0.472049	3.0228	2	Prupe.1G485400, Prupe.1G485600
GO:0044853	CC	plasma membrane raft	0.0486649	0.472049	3.0228	2	Prupe.1G485400, Prupe.1G485600
GO:0005089	MF	Rho guanyl-nucleotide exchange factor activity	0.0503934	0.48578	2.98789	3	Prupe.2G170400, Prupe.5G015000, Prupe.6G264800
GO:0005504	MF	fatty acid binding	0.0519174	0.497382	2.9581	6	Prupe.1G179900, Prupe.4G228100, Prupe.6G181800, Prupe.6G264700, Prupe.7G067100, Prupe.8G190500
GO:0033540	BP	fatty acid beta-oxidation using acyl-CoA oxidase	0.0530034	0.498995	2.9374	2	Prupe.6G181800, Prupe.7G067100
GO:0016035	CC	zeta DNA polymerase complex	0.0530504	0.498995	2.93651	3	Prupe.1G328900, Prupe.4G141800, Prupe.6G025200
GO:0003997	MF	acyl-CoA oxidase activity	0.0530034	0.498995	2.9374	2	Prupe.6G181800, Prupe.7G067100
GO:0004565	MF	beta-galactosidase activity	0.0534182	0.499428	2.9296	4	Prupe.1G372800, Prupe.4G279500, Prupe.7G163100, Prupe.8G089500
GO:0006571	BP	tyrosine biosynthetic process	0.054577	0.501204	2.90814	2	Prupe.3G092000, Prupe.3G127100
GO:0004665	MF	prephenate dehydrogenase (NADP+) activity	0.054577	0.501204	2.90814	2	Prupe.3G092000, Prupe.3G127100
GO:0008977	MF	prephenate dehydrogenase (NAD+) activity	0.054577	0.501204	2.90814	2	Prupe.3G092000, Prupe.3G127100
GO:0008104	BP	protein localization	0.0550917	0.502955	2.89876	5	Prupe.1G308600, Prupe.3G070200, Prupe.3G236100, Prupe.7G178000, Prupe.8G061300
GO:0046739	BP	transport of virus in multicellular host	0.0570305	0.515345	2.86417	2	Prupe.1G048300, Prupe.8G216200
GO:0008115	MF	sarcosine oxidase activity	0.057113	0.515345	2.86272	2	Prupe.1G458800, Prupe.1G458900
GO:0044419	BP	interspecies interaction between organisms	0.0583621	0.523572	2.84109	1	Prupe.3G094600
GO:0007166	BP	cell surface receptor signaling pathway	0.0604022	0.530776	2.80673	15	Prupe.2G255300, Prupe.2G325000, Prupe.3G099400, Prupe.3G099500, Prupe.3G181200, Prupe.3G181400, Prupe.3G181600, Prupe.4G093000, Prupe.4G093300, Prupe.4G093500, Prupe.4G093600, Prupe.4G094100, Prupe.4G094300, Prupe.6G357200, Prupe.8G149600
GO:0009506	CC	plasmodesma	0.0604932	0.530776	2.80522	35	Prupe.1G048300, Prupe.1G098400, Prupe.1G185400, Prupe.1G269800, Prupe.2G063900, Prupe.2G077800, Prupe.2G206600, Prupe.3G017500, Prupe.3G017700, Prupe.3G155600, Prupe.3G251000, Prupe.3G303100, Prupe.4G021100, Prupe.4G026800, Prupe.4G056100, Prupe.4G086300, Prupe.4G089200, Prupe.4G137100, Prupe.4G276800, Prupe.6G022400, Prupe.6G155100, Prupe.6G228000, Prupe.6G228200, Prupe.6G234500, Prupe.6G321200,…
GO:0005871	CC	kinesin complex	0.0605331	0.530776	2.80457	5	Prupe.4G184200, Prupe.4G231600, Prupe.5G214600, Prupe.6G149000, Prupe.8G087800
GO:0072686	CC	mitotic spindle	0.0601124	0.530776	2.81154	3	Prupe.2G138600, Prupe.3G140300, Prupe.3G257100
GO:0042546	BP	cell wall biogenesis	0.0627476	0.537152	2.76863	8	Prupe.1G169700, Prupe.1G278500, Prupe.3G223200, Prupe.4G025600, Prupe.5G001800, Prupe.6G110300, Prupe.7G128000, Prupe.8G152500
GO:0031408	BP	oxylipin biosynthetic process	0.0618298	0.537152	2.78337	4	Prupe.2G005300, Prupe.6G324100, Prupe.6G324200, Prupe.6G324400
GO:0080022	BP	primary root development	0.0623037	0.537152	2.77574	2	Prupe.3G094600, Prupe.3G265800
GO:0004180	MF	carboxypeptidase activity	0.0622475	0.537152	2.77664	6	Prupe.1G348100, Prupe.1G348300, Prupe.1G441000, Prupe.5G143500, Prupe.6G114600, Prupe.7G264200
GO:0015112	MF	nitrate transmembrane transporter activity	0.0629907	0.537152	2.76477	3	Prupe.1G249000, Prupe.5G073600, Prupe.6G107500
GO:0008236	MF	serine-type peptidase activity	0.0651627	0.552637	2.73087	18	Prupe.1G357500, Prupe.1G491400, Prupe.2G035100, Prupe.2G151900, Prupe.2G152000, Prupe.2G242000, Prupe.2G242100, Prupe.2G242400, Prupe.2G285500, Prupe.3G032200, Prupe.5G085700, Prupe.5G133500, Prupe.6G031400, Prupe.6G115100, Prupe.6G115200, Prupe.6G224600, Prupe.6G356800, Prupe.7G197100
GO:0031072	MF	heat shock protein binding	0.0656139	0.553439	2.72397	10	Prupe.2G234200, Prupe.2G234300, Prupe.2G234400, Prupe.3G066800, Prupe.4G087300, Prupe.6G053300, Prupe.7G106500, Prupe.7G106700, Prupe.7G108100, Prupe.7G108500
GO:0009651	BP	response to salt stress	0.0687052	0.555933	2.67793	23	Prupe.1G384600, Prupe.1G407100, Prupe.2G198000, Prupe.2G198100, Prupe.2G243800, Prupe.3G005100, Prupe.3G111000, Prupe.4G186500, Prupe.6G018800, Prupe.6G019000, Prupe.6G019100, Prupe.6G062500, Prupe.6G066100, Prupe.6G066300, Prupe.6G066400, Prupe.6G134900, Prupe.6G136300, Prupe.6G136400, Prupe.6G136500, Prupe.6G136700, Prupe.6G286000, Prupe.7G083700, Prupe.8G165700
GO:0009269	BP	response to desiccation	0.0675234	0.555933	2.69528	3	Prupe.2G178100, Prupe.2G178300, Prupe.6G132700
GO:0006116	BP	NADH oxidation	0.0689279	0.555933	2.67469	2	Prupe.3G296200, Prupe.7G053500
GO:0046168	BP	glycerol-3-phosphate catabolic process	0.0689279	0.555933	2.67469	2	Prupe.3G296200, Prupe.7G053500
GO:0002213	BP	defense response to insect	0.0716408	0.555933	2.63609	1	Prupe.4G276500
GO:0010942	BP	positive regulation of cell death	0.0716408	0.555933	2.63609	1	Prupe.4G276500
GO:0051707	BP	response to other organism	0.0716408	0.555933	2.63609	1	Prupe.4G276500
GO:0071327	BP	cellular response to trehalose stimulus	0.0716408	0.555933	2.63609	1	Prupe.4G276500
GO:0080151	BP	positive regulation of salicylic acid mediated signaling pathway	0.0716408	0.555933	2.63609	1	Prupe.4G276500
GO:1900426	BP	positive regulation of defense response to bacterium	0.0716408	0.555933	2.63609	1	Prupe.4G276500
GO:1901183	BP	positive regulation of camalexin biosynthetic process	0.0716408	0.555933	2.63609	1	Prupe.4G276500
GO:0031090	CC	organelle membrane	0.0662966	0.555933	2.71362	2	Prupe.1G457300, Prupe.3G044500
GO:0008289	MF	lipid binding	0.0711771	0.555933	2.64258	22	Prupe.1G016900, Prupe.1G179900, Prupe.1G482500, Prupe.1G587600, Prupe.3G015300, Prupe.4G099600, Prupe.4G152200, Prupe.4G206000, Prupe.4G228100, Prupe.5G072800, Prupe.5G073200, Prupe.5G119200, Prupe.5G224300, Prupe.5G235000, Prupe.6G264700, Prupe.6G292800, Prupe.6G293000, Prupe.7G057100, Prupe.7G234500, Prupe.7G248900, Prupe.8G190500, Prupe.8G238000
GO:0004630	MF	phospholipase D activity	0.0691017	0.555933	2.67218	3	Prupe.1G480500, Prupe.3G051200, Prupe.7G243800
GO:0070290	MF	N-acylphosphatidylethanolamine-specific phospholipase D activity	0.0691017	0.555933	2.67218	3	Prupe.1G480500, Prupe.3G051200, Prupe.7G243800
GO:0004367	MF	glycerol-3-phosphate dehydrogenase [NAD+] activity	0.0689279	0.555933	2.67469	2	Prupe.3G296200, Prupe.7G053500
GO:0047661	MF	amino-acid racemase activity	0.0726008	0.560579	2.62278	1	Prupe.3G081000
GO:0030246	MF	carbohydrate binding	0.0730941	0.561595	2.61601	18	Prupe.1G110700, Prupe.1G309900, Prupe.1G372800, Prupe.1G536700, Prupe.1G537300, Prupe.1G538400, Prupe.4G175600, Prupe.4G241200, Prupe.5G118000, Prupe.6G024000, Prupe.6G208400, Prupe.6G261400, Prupe.6G261500, Prupe.6G282700, Prupe.7G163100, Prupe.8G089500, Prupe.8G117500, Prupe.8G183000
GO:0008447	MF	L-ascorbate oxidase activity	0.076013	0.581144	2.57685	2	Prupe.4G131900, Prupe.6G155100
GO:0006536	BP	glutamate metabolic process	0.0779698	0.590288	2.55143	2	Prupe.1G339900, Prupe.3G016000
GO:0004351	MF	glutamate decarboxylase activity	0.0779698	0.590288	2.55143	2	Prupe.1G339900, Prupe.3G016000
GO:0005254	MF	chloride channel activity	0.0796566	0.600131	2.53003	1	Prupe.3G053200
GO:0034484	BP	raffinose catabolic process	0.0804556	0.603134	2.52005	1	Prupe.7G064000
GO:0000254	MF	C-4 methylsterol oxidase activity	0.0808324	0.603134	2.51538	3	Prupe.2G112800, Prupe.2G113600, Prupe.7G050800
GO:0010026	BP	trichome differentiation	0.0826584	0.613808	2.49304	2	Prupe.1G260700, Prupe.3G143800
GO:0009753	BP	response to jasmonic acid	0.0848302	0.623964	2.4671	3	Prupe.1G384600, Prupe.1G413900, Prupe.5G086700
GO:0051787	MF	misfolded protein binding	0.0846993	0.623964	2.46865	8	Prupe.2G234200, Prupe.2G234300, Prupe.2G234400, Prupe.2G273500, Prupe.7G106500, Prupe.7G106700, Prupe.7G108100, Prupe.7G108500
GO:0009834	BP	plant-type secondary cell wall biogenesis	0.0902811	0.636684	2.40483	8	Prupe.1G582100, Prupe.3G205100, Prupe.5G131900, Prupe.6G099300, Prupe.6G099400, Prupe.6G238300, Prupe.6G239800, Prupe.7G120500
GO:0009696	BP	salicylic acid metabolic process	0.0928715	0.636684	2.37654	5	Prupe.7G141000, Prupe.7G141200, Prupe.7G141300, Prupe.7G142200, Prupe.8G115000
GO:0015706	BP	nitrate transport	0.090419	0.636684	2.4033	3	Prupe.1G249000, Prupe.5G073600, Prupe.6G107500
GO:0051091	BP	positive regulation of DNA-binding transcription factor activity	0.0910581	0.636684	2.39626	2	Prupe.2G041200, Prupe.6G347000
GO:0051555	BP	flavonol biosynthetic process	0.0929371	0.636684	2.37583	2	Prupe.1G502700, Prupe.3G170800
GO:0007267	BP	cell-cell signaling	0.0931729	0.636684	2.3733	1	Prupe.3G049600
GO:0010430	BP	fatty acid omega-oxidation	0.0931729	0.636684	2.3733	1	Prupe.3G049600
GO:0051233	CC	spindle midzone	0.0931336	0.636684	2.37372	2	Prupe.1G443900, Prupe.6G229300
GO:0030170	MF	pyridoxal phosphate binding	0.0931419	0.636684	2.37363	16	Prupe.1G283400, Prupe.1G339900, Prupe.1G509100, Prupe.1G539400, Prupe.2G176900, Prupe.3G016000, Prupe.3G094600, Prupe.3G133000, Prupe.3G133100, Prupe.4G086600, Prupe.4G087100, Prupe.6G116600, Prupe.6G202600, Prupe.6G338400, Prupe.8G056800, Prupe.8G156100
GO:0050662	MF	coenzyme binding	0.0884529	0.636684	2.42529	9	Prupe.1G164800, Prupe.1G587500, Prupe.2G184900, Prupe.3G097600, Prupe.4G200500, Prupe.5G004800, Prupe.6G051200, Prupe.6G051300, Prupe.I003000
GO:0016298	MF	lipase activity	0.0895083	0.636684	2.41342	7	Prupe.1G312200, Prupe.1G361900, Prupe.1G362100, Prupe.3G032600, Prupe.3G032700, Prupe.3G033300, Prupe.3G033500
GO:0080030	MF	methyl indole-3-acetate esterase activity	0.0928715	0.636684	2.37654	5	Prupe.7G141000, Prupe.7G141200, Prupe.7G141300, Prupe.7G142200, Prupe.8G115000
GO:0080031	MF	methyl salicylate esterase activity	0.0928715	0.636684	2.37654	5	Prupe.7G141000, Prupe.7G141200, Prupe.7G141300, Prupe.7G142200, Prupe.8G115000
GO:0080032	MF	methyl jasmonate esterase activity	0.0928715	0.636684	2.37654	5	Prupe.7G141000, Prupe.7G141200, Prupe.7G141300, Prupe.7G142200, Prupe.8G115000
GO:0010329	MF	auxin efflux transmembrane transporter activity	0.0935261	0.636684	2.36952	3	Prupe.5G233100, Prupe.7G031400, Prupe.8G018200
GO:0015114	MF	phosphate ion transmembrane transporter activity	0.0894879	0.636684	2.41365	2	Prupe.1G278700, Prupe.3G264100
GO:0004861	MF	cyclin-dependent protein serine/threonine kinase inhibitor activity	0.0935335	0.636684	2.36944	2	Prupe.7G135000, Prupe.8G122300
GO:0042742	BP	defense response to bacterium	0.0940737	0.637565	2.36368	17	Prupe.1G157800, Prupe.3G094600, Prupe.3G098100, Prupe.4G027700, Prupe.4G142300, Prupe.4G175600, Prupe.4G241200, Prupe.4G276500, Prupe.6G024000, Prupe.6G261400, Prupe.6G261500, Prupe.6G282700, Prupe.6G286000, Prupe.6G343900, Prupe.8G117500, Prupe.8G183000, Prupe.8G235600
GO:0034620	BP	cellular response to unfolded protein	0.09526	0.64211	2.35114	7	Prupe.2G234200, Prupe.2G234300, Prupe.2G234400, Prupe.7G106500, Prupe.7G106700, Prupe.7G108100, Prupe.7G108500
GO:0060586	BP	multicellular organismal iron ion homeostasis	0.0955718	0.64211	2.34788	1	Prupe.2G085600
GO:0015833	BP	peptide transport	0.098758	0.642659	2.31508	3	Prupe.6G026100, Prupe.6G026200, Prupe.6G026300
GO:2000012	BP	regulation of auxin polar transport	0.0989662	0.642659	2.31298	2	Prupe.1G222800, Prupe.1G413900
GO:0055028	CC	cortical microtubule	0.0962815	0.642659	2.34048	3	Prupe.6G142700, Prupe.6G296400, Prupe.6G365700
GO:0008483	MF	transaminase activity	0.0981755	0.642659	2.321	8	Prupe.1G248200, Prupe.1G509100, Prupe.3G094600, Prupe.3G133000, Prupe.3G133100, Prupe.8G041600, Prupe.8G155300, Prupe.8G156100
GO:0016702	MF	oxidoreductase activity, acting on single donors with incorporation of molecular oxygen, incorporation of two atoms of oxygen	0.0970471	0.642659	2.33256	6	Prupe.1G448400, Prupe.1G449100, Prupe.2G005300, Prupe.6G324100, Prupe.6G324200, Prupe.6G324400
GO:0004024	MF	alcohol dehydrogenase activity, zinc-dependent	0.0987108	0.642659	2.31556	4	Prupe.1G356700, Prupe.8G018300, Prupe.8G018600, Prupe.8G207300
GO:0051903	MF	S-(hydroxymethyl)glutathione dehydrogenase activity	0.0987108	0.642659	2.31556	4	Prupe.1G356700, Prupe.8G018300, Prupe.8G018600, Prupe.8G207300
GO:0004097	MF	catechol oxidase activity	0.0971746	0.642659	2.33125	3	Prupe.4G041400, Prupe.4G041700, Prupe.4G041900
GO:0007142	BP	male meiosis II	0.0998255	0.645538	2.30433	2	Prupe.1G046000, Prupe.3G178400
GO:0010338	BP	leaf formation	0.101026	0.648159	2.29237	1	Prupe.6G255800
GO:0004831	MF	tyrosine-tRNA ligase activity	0.101066	0.648159	2.29198	2	Prupe.2G139100, Prupe.5G096900
GO:0071249	BP	cellular response to nitrate	0.102107	0.649469	2.28173	2	Prupe.1G249000, Prupe.6G107500
GO:0051214	BP	RNA virus induced gene silencing	0.102043	0.649469	2.28236	1	Prupe.8G202000
GO:0009668	BP	plastid membrane organization	0.102989	0.650843	2.27314	1	Prupe.6G058100
GO:0070006	MF	metalloaminopeptidase activity	0.103162	0.650843	2.27146	3	Prupe.1G457200, Prupe.1G457300, Prupe.3G044500
GO:0030145	MF	manganese ion binding	0.104142	0.651729	2.262	12	Prupe.2G077100, Prupe.3G041700, Prupe.5G182600, Prupe.5G240700, Prupe.7G112300, Prupe.7G200100, Prupe.7G200200, Prupe.7G200300, Prupe.8G025600, Prupe.8G025800, Prupe.8G025900, Prupe.8G035700
GO:0008970	MF	phospholipase A1 activity	0.103976	0.651729	2.26359	3	Prupe.4G059100, Prupe.5G062500, Prupe.6G288500
GO:0034968	BP	histone lysine methylation	0.105068	0.652264	2.25314	4	Prupe.1G216000, Prupe.2G064600, Prupe.2G247900, Prupe.7G185900
GO:0009331	CC	glycerol-3-phosphate dehydrogenase complex	0.104855	0.652264	2.25518	2	Prupe.3G296200, Prupe.7G053500
GO:0006865	BP	amino acid transport	0.111581	0.678752	2.19301	14	Prupe.1G233800, Prupe.1G356000, Prupe.1G388700, Prupe.1G444800, Prupe.1G490100, Prupe.1G490200, Prupe.1G491000, Prupe.1G491100, Prupe.1G491300, Prupe.3G300900, Prupe.4G137000, Prupe.4G276400, Prupe.4G277700, Prupe.8G163100
GO:0007178	BP	transmembrane receptor protein serine/threonine kinase signaling pathway	0.125072	0.678752	2.07887	9	Prupe.1G157800, Prupe.4G175600, Prupe.4G241200, Prupe.6G024000, Prupe.6G261400, Prupe.6G261500, Prupe.6G282700, Prupe.8G117500, Prupe.8G183000
GO:0010951	BP	negative regulation of endopeptidase activity	0.129721	0.678752	2.04237	9	Prupe.1G032000, Prupe.1G032400, Prupe.1G032500, Prupe.1G032700, Prupe.1G552600, Prupe.1G552700, Prupe.4G155200, Prupe.I000200, Prupe.I000300
GO:0009694	BP	jasmonic acid metabolic process	0.122784	0.678752	2.09733	5	Prupe.7G141000, Prupe.7G141200, Prupe.7G141300, Prupe.7G142200, Prupe.8G115000
GO:0046294	BP	formaldehyde catabolic process	0.111706	0.678752	2.19188	4	Prupe.1G356700, Prupe.8G018300, Prupe.8G018600, Prupe.8G207300
GO:0045017	BP	glycerolipid biosynthetic process	0.127337	0.678752	2.06092	4	Prupe.2G188400, Prupe.3G140400, Prupe.4G257800, Prupe.4G258100
GO:0010252	BP	auxin homeostasis	0.125912	0.678752	2.07218	3	Prupe.5G233100, Prupe.7G031400, Prupe.8G018200
GO:0009740	BP	gibberellic acid mediated signaling pathway	0.128583	0.678752	2.05118	3	Prupe.1G260700, Prupe.3G143800, Prupe.3G200200
GO:0045839	BP	negative regulation of mitotic nuclear division	0.130684	0.678752	2.03497	3	Prupe.6G078900, Prupe.6G114400, Prupe.6G254000
GO:0035672	BP	oligopeptide transmembrane transport	0.131519	0.678752	2.02861	3	Prupe.6G026100, Prupe.6G026200, Prupe.6G026300
GO:0007094	BP	mitotic spindle assembly checkpoint	0.135394	0.678752	1.99957	3	Prupe.1G281000, Prupe.2G254200, Prupe.3G189400
GO:0060236	BP	regulation of mitotic spindle organization	0.128763	0.678752	2.04978	2	Prupe.3G140300, Prupe.3G257100
GO:0010025	BP	wax biosynthetic process	0.129213	0.678752	2.04629	2	Prupe.6G126900, Prupe.8G108400
GO:0000082	BP	G1/S transition of mitotic cell cycle	0.132247	0.678752	2.02308	2	Prupe.5G003700, Prupe.8G131900
GO:0051754	BP	meiotic sister chromatid cohesion, centromeric	0.132657	0.678752	2.01998	2	Prupe.2G254200, Prupe.3G189400
GO:0006336	BP	DNA replication-independent nucleosome assembly	0.141314	0.678752	1.95677	2	Prupe.1G320600, Prupe.8G049400
GO:0006208	BP	pyrimidine nucleobase catabolic process	0.115131	0.678752	2.16168	1	Prupe.4G264100
GO:0010241	BP	ent-kaurene oxidation to kaurenoic acid	0.118407	0.678752	2.13363	1	Prupe.1G388500
GO:0048629	BP	trichome patterning	0.123987	0.678752	2.08758	1	Prupe.2G170100
GO:0010371	BP	regulation of gibberellin biosynthetic process	0.131396	0.678752	2.02954	1	Prupe.6G196000
GO:0048446	BP	petal morphogenesis	0.131798	0.678752	2.02649	1	Prupe.1G263800
GO:0006792	BP	regulation of sulfur utilization	0.133303	0.678752	2.01513	1	Prupe.8G204700
GO:0010438	BP	cellular response to sulfur starvation	0.133303	0.678752	2.01513	1	Prupe.8G204700
GO:0010439	BP	regulation of glucosinolate biosynthetic process	0.133303	0.678752	2.01513	1	Prupe.8G204700
GO:0006560	BP	proline metabolic process	0.133769	0.678752	2.01164	1	Prupe.3G243500
GO:0006562	BP	proline catabolic process	0.133769	0.678752	2.01164	1	Prupe.3G243500
GO:0080038	BP	positive regulation of cytokinin-activated signaling pathway	0.13511	0.678752	2.00167	1	Prupe.6G123100
GO:0060866	BP	leaf abscission	0.136707	0.678752	1.98991	1	Prupe.4G276500
GO:0035404	BP	histone-serine phosphorylation	0.140114	0.678752	1.9653	1	Prupe.1G443900
GO:0046208	BP	spermine catabolic process	0.142535	0.678752	1.94817	1	Prupe.7G209800
GO:1903602	BP	thermospermine catabolic process	0.142535	0.678752	1.94817	1	Prupe.7G209800
GO:0019277	BP	UDP-N-acetylgalactosamine biosynthetic process	0.142663	0.678752	1.94727	1	Prupe.4G167100
GO:0010226	BP	response to lithium ion	0.142778	0.678752	1.94647	1	Prupe.6G354100
GO:0010199	BP	organ boundary specification between lateral organs and the meristem	0.143545	0.678752	1.94111	1	Prupe.5G167800
GO:0002239	BP	response to oomycetes	0.144799	0.678752	1.93241	1	Prupe.2G206600
GO:0010444	BP	guard mother cell differentiation	0.144994	0.678752	1.93106	1	Prupe.8G131900
GO:0045792	BP	negative regulation of cell size	0.145049	0.678752	1.93068	1	Prupe.8G174800
GO:0048281	BP	inflorescence morphogenesis	0.145049	0.678752	1.93068	1	Prupe.8G174800
GO:0000914	BP	phragmoplast assembly	0.145103	0.678752	1.93031	1	Prupe.6G326100
GO:2000306	BP	positive regulation of photomorphogenesis	0.145195	0.678752	1.92968	1	Prupe.8G087900
GO:0002933	BP	lipid hydroxylation	0.145196	0.678752	1.92967	1	Prupe.2G189800
GO:0051650	BP	establishment of vesicle localization	0.145196	0.678752	1.92967	1	Prupe.6G360900
GO:0051511	BP	negative regulation of unidimensional cell growth	0.145197	0.678752	1.92967	1	Prupe.3G149200
GO:1901347	BP	negative regulation of secondary cell wall biogenesis	0.145197	0.678752	1.92967	1	Prupe.3G149200
GO:2000123	BP	positive regulation of stomatal complex development	0.145197	0.678752	1.92967	1	Prupe.8G192000
GO:0045824	BP	negative regulation of innate immune response	0.145197	0.678752	1.92966	1	Prupe.6G348200
GO:0010037	BP	response to carbon dioxide	0.145197	0.678752	1.92966	1	Prupe.4G067000
GO:0010231	BP	maintenance of seed dormancy	0.145197	0.678752	1.92966	1	Prupe.4G140900
GO:0005880	CC	nuclear microtubule	0.113968	0.678752	2.17183	3	Prupe.3G140300, Prupe.3G257100, Prupe.4G000100
GO:0070545	CC	PeBoW complex	0.111576	0.678752	2.19305	2	Prupe.8G015200, Prupe.8G015700
GO:0005881	CC	cytoplasmic microtubule	0.114761	0.678752	2.16491	2	Prupe.1G135600, Prupe.6G229300
GO:0030141	CC	secretory granule	0.127752	0.678752	2.05766	1	Prupe.2G144900
GO:0009055	MF	electron transfer activity	0.1141	0.678752	2.17068	27	Prupe.1G140500, Prupe.1G156200, Prupe.1G394200, Prupe.1G410500, Prupe.1G441800, Prupe.1G562300, Prupe.2G073600, Prupe.2G094300, Prupe.2G133000, Prupe.3G062100, Prupe.3G099600, Prupe.3G112300, Prupe.3G261600, Prupe.3G304200, Prupe.4G205500, Prupe.4G270100, Prupe.5G093800, Prupe.5G128300, Prupe.5G242500, Prupe.7G092000, Prupe.7G109100, Prupe.7G246200, Prupe.7G246300, Prupe.7G246400, Prupe.7G246500,…
GO:0071949	MF	FAD binding	0.118757	0.678752	2.13068	15	Prupe.1G032800, Prupe.1G171200, Prupe.1G345300, Prupe.1G450800, Prupe.1G471700, Prupe.3G243500, Prupe.4G097000, Prupe.4G098500, Prupe.4G099200, Prupe.4G099500, Prupe.4G230400, Prupe.6G181800, Prupe.7G067100, Prupe.7G208400, Prupe.7G208500
GO:0016709	MF	oxidoreductase activity, acting on paired donors, with incorporation or reduction of molecular oxygen, NAD(P)H as one donor, and incorporation of one atom of oxygen	0.118365	0.678752	2.13399	10	Prupe.1G388500, Prupe.1G428400, Prupe.2G086300, Prupe.6G007200, Prupe.6G046800, Prupe.6G226900, Prupe.6G227000, Prupe.6G227100, Prupe.6G227400, Prupe.7G071800
GO:0004675	MF	transmembrane receptor protein serine/threonine kinase activity	0.140122	0.678752	1.96524	9	Prupe.1G157800, Prupe.4G175600, Prupe.4G241200, Prupe.6G024000, Prupe.6G261400, Prupe.6G261500, Prupe.6G282700, Prupe.8G117500, Prupe.8G183000
GO:0044183	MF	protein folding chaperone	0.122131	0.678752	2.10266	8	Prupe.2G234200, Prupe.2G234300, Prupe.2G234400, Prupe.4G140900, Prupe.7G106500, Prupe.7G106700, Prupe.7G108100, Prupe.7G108500
GO:0004185	MF	serine-type carboxypeptidase activity	0.128489	0.678752	2.05191	8	Prupe.1G348100, Prupe.1G348300, Prupe.1G441000, Prupe.2G023900, Prupe.5G143500, Prupe.6G114600, Prupe.7G264200, Prupe.8G148400
GO:0030570	MF	pectate lyase activity	0.127903	0.678752	2.05648	5	Prupe.1G060900, Prupe.1G239900, Prupe.1G565500, Prupe.5G245600, Prupe.8G206800
GO:0004032	MF	alditol:NADP+ 1-oxidoreductase activity	0.117192	0.678752	2.14394	4	Prupe.1G245400, Prupe.1G339000, Prupe.6G094300, Prupe.6G261600
GO:0047196	MF	long-chain-alcohol O-fatty-acyltransferase activity	0.128311	0.678752	2.0533	4	Prupe.2G188400, Prupe.3G140400, Prupe.4G257800, Prupe.4G258100
GO:0004525	MF	ribonuclease III activity	0.144976	0.678752	1.93119	4	Prupe.3G213200, Prupe.4G219300, Prupe.4G219500, Prupe.8G202000
GO:0034485	MF	phosphatidylinositol-3,4,5-trisphosphate 5-phosphatase activity	0.121909	0.678752	2.10448	3	Prupe.1G384600, Prupe.6G249400, Prupe.8G236900
GO:0035673	MF	oligopeptide transmembrane transporter activity	0.131519	0.678752	2.02861	3	Prupe.6G026100, Prupe.6G026200, Prupe.6G026300
GO:0000822	MF	inositol hexakisphosphate binding	0.11178	0.678752	2.19122	2	Prupe.1G278700, Prupe.3G264100
GO:0004020	MF	adenylylsulfate kinase activity	0.116436	0.678752	2.15041	2	Prupe.1G023000, Prupe.7G004400
GO:0008239	MF	dipeptidyl-peptidase activity	0.120546	0.678752	2.11572	2	Prupe.6G115100, Prupe.6G115200
GO:0004930	MF	G protein-coupled receptor activity	0.126009	0.678752	2.0714	2	Prupe.1G399800, Prupe.1G400600
GO:0004556	MF	alpha-amylase activity	0.12998	0.678752	2.04037	2	Prupe.1G435600, Prupe.8G125200
GO:0004157	MF	dihydropyrimidinase activity	0.115131	0.678752	2.16168	1	Prupe.4G264100
GO:0004657	MF	proline dehydrogenase activity	0.133769	0.678752	2.01164	1	Prupe.3G243500
GO:0052903	MF	N1-acetylspermine:oxygen oxidoreductase (3-acetamidopropanal-forming) activity	0.142535	0.678752	1.94817	1	Prupe.7G209800
GO:0008760	MF	UDP-N-acetylglucosamine 1-carboxyvinyltransferase activity	0.142663	0.678752	1.94727	1	Prupe.4G167100
GO:0034007	MF	S-linalool synthase activity	0.143919	0.678752	1.93851	1	Prupe.4G030400
GO:1990538	MF	xylan O-acetyltransferase activity	0.144135	0.678752	1.93701	1	Prupe.4G170300
GO:0050614	MF	delta24-sterol reductase activity	0.144201	0.678752	1.93655	1	Prupe.1G345300
GO:0003831	MF	beta-N-acetylglucosaminylglycopeptide beta-1,4-galactosyltransferase activity	0.144342	0.678752	1.93557	1	Prupe.5G001800
GO:0010279	MF	indole-3-acetic acid amido synthetase activity	0.144465	0.678752	1.93472	1	Prupe.4G197000
GO:0052722	MF	fatty acid in-chain hydroxylase activity	0.145196	0.678752	1.92967	1	Prupe.2G189800
GO:0050589	MF	leucocyanidin oxygenase activity	0.145196	0.678752	1.92967	1	Prupe.5G086700
GO:0018685	MF	alkane 1-monooxygenase activity	0.145196	0.678752	1.92967	1	Prupe.2G171800
GO:0090568	#N/A	#N/A	0.133303	0.678752	2.01513	1	Prupe.8G204700
GO:0090307	BP	mitotic spindle assembly	0.146985	0.685046	1.91743	2	Prupe.3G140300, Prupe.3G257100
GO:0042542	BP	response to hydrogen peroxide	0.148104	0.688197	1.90984	7	Prupe.1G407100, Prupe.2G243800, Prupe.3G005100, Prupe.6G062500, Prupe.6G066100, Prupe.6G066300, Prupe.6G066400
GO:0006072	BP	glycerol-3-phosphate metabolic process	0.148788	0.689312	1.90523	2	Prupe.3G296200, Prupe.7G053500
GO:0000779	CC	condensed chromosome, centromeric region	0.150176	0.693672	1.89594	2	Prupe.1G443900, Prupe.2G007300
GO:0071277	BP	cellular response to calcium ion	0.150684	0.693951	1.89257	1	Prupe.6G333400
GO:0000466	BP	maturation of 5.8S rRNA from tricistronic rRNA transcript (SSU-rRNA, 5.8S rRNA, LSU-rRNA)	0.151598	0.696096	1.88652	2	Prupe.8G015200, Prupe.8G015700
GO:0048038	MF	quinone binding	0.152384	0.69764	1.88135	4	Prupe.1G011900, Prupe.1G012000, Prupe.1G012100, Prupe.5G078700
GO:0007050	BP	cell cycle arrest	0.153566	0.700985	1.87362	2	Prupe.7G135000, Prupe.8G122300
GO:0033673	BP	negative regulation of kinase activity	0.155985	0.705799	1.85799	2	Prupe.1G155600, Prupe.4G177000
GO:0047216	MF	inositol 3-alpha-galactosyltransferase activity	0.155873	0.705799	1.85872	2	Prupe.3G005100, Prupe.6G309400
GO:0019210	MF	kinase inhibitor activity	0.155985	0.705799	1.85799	2	Prupe.1G155600, Prupe.4G177000
GO:0002229	BP	defense response to oomycetes	0.157011	0.708252	1.85144	9	Prupe.1G157800, Prupe.4G175600, Prupe.4G241200, Prupe.6G024000, Prupe.6G261400, Prupe.6G261500, Prupe.6G282700, Prupe.8G117500, Prupe.8G183000
GO:0009690	BP	cytokinin metabolic process	0.159101	0.708252	1.83821	2	Prupe.7G208400, Prupe.7G208500
GO:0042939	BP	tripeptide transport	0.159266	0.708252	1.83718	1	Prupe.1G045600
GO:0018024	MF	histone-lysine N-methyltransferase activity	0.158752	0.708252	1.84041	4	Prupe.1G216000, Prupe.2G064600, Prupe.2G247900, Prupe.7G185900
GO:0019139	MF	cytokinin dehydrogenase activity	0.159101	0.708252	1.83821	2	Prupe.7G208400, Prupe.7G208500
GO:0042937	MF	tripeptide transmembrane transporter activity	0.159266	0.708252	1.83718	1	Prupe.1G045600
GO:0004620	MF	phospholipase activity	0.160276	0.709107	1.83086	6	Prupe.1G439500, Prupe.1G439700, Prupe.1G439800, Prupe.1G440100, Prupe.4G086500, Prupe.8G231900
GO:0004040	MF	amidase activity	0.160371	0.709107	1.83026	2	Prupe.4G282000, Prupe.4G282100
GO:0035235	BP	ionotropic glutamate receptor signaling pathway	0.162257	0.714773	1.81857	1	Prupe.2G105700
GO:0030690	CC	Noc1p-Noc2p complex	0.163034	0.714773	1.81379	1	Prupe.6G014700
GO:0030691	CC	Noc2p-Noc3p complex	0.163034	0.714773	1.81379	1	Prupe.6G014700
GO:0032875	BP	regulation of DNA endoreduplication	0.164828	0.71882	1.80285	3	Prupe.6G078900, Prupe.6G114400, Prupe.6G254000
GO:0019538	BP	protein metabolic process	0.164884	0.71882	1.80251	3	Prupe.1G073700, Prupe.2G071700, Prupe.7G097400
GO:0045490	BP	pectin catabolic process	0.167744	0.72924	1.78532	17	Prupe.1G060900, Prupe.1G178400, Prupe.1G239900, Prupe.1G529500, Prupe.1G565500, Prupe.2G278200, Prupe.2G278300, Prupe.2G310600, Prupe.3G185700, Prupe.5G069600, Prupe.5G245600, Prupe.6G318500, Prupe.7G190300, Prupe.7G190700, Prupe.8G206800, Prupe.8G263900, Prupe.8G264100
GO:2000022	BP	regulation of jasmonic acid mediated signaling pathway	0.170748	0.738166	1.76756	4	Prupe.1G331500, Prupe.3G037800, Prupe.4G082500, Prupe.4G276500
GO:0010225	BP	response to UV-C	0.170347	0.738166	1.76992	1	Prupe.4G276500
GO:0032259	BP	methylation	0.174132	0.74042	1.74794	32	Prupe.1G216000, Prupe.1G227100, Prupe.1G375700, Prupe.1G375800, Prupe.2G107200, Prupe.2G199400, Prupe.2G199600, Prupe.2G199800, Prupe.2G290800, Prupe.3G118900, Prupe.3G119100, Prupe.3G119700, Prupe.3G119800, Prupe.3G120200, Prupe.3G120400, Prupe.3G129000, Prupe.3G129200, Prupe.3G129600, Prupe.3G129800, Prupe.3G235500, Prupe.5G228500, Prupe.5G228700, Prupe.6G011600, Prupe.7G158400, Prupe.7G185900,…
GO:0042398	BP	cellular modified amino acid biosynthetic process	0.174005	0.74042	1.74867	1	Prupe.5G099600
GO:0042555	CC	MCM complex	0.17363	0.74042	1.75083	2	Prupe.6G241500, Prupe.8G031700
GO:0004084	MF	branched-chain-amino-acid transaminase activity	0.17276	0.74042	1.75585	2	Prupe.1G416900, Prupe.8G155300
GO:0004591	MF	oxoglutarate dehydrogenase (succinyl-transferring) activity	0.173691	0.74042	1.75048	1	Prupe.2G230300
GO:0004357	MF	glutamate-cysteine ligase activity	0.174005	0.74042	1.74867	1	Prupe.5G099600
GO:0003993	MF	acid phosphatase activity	0.176766	0.749565	1.73293	7	Prupe.5G151400, Prupe.5G151500, Prupe.6G296600, Prupe.7G113300, Prupe.8G088900, Prupe.8G089000, Prupe.8G216700
GO:0070012	MF	oligopeptidase activity	0.18098	0.765345	1.70937	1	Prupe.1G357500
GO:0006073	BP	cellular glucan metabolic process	0.182885	0.769209	1.6989	6	Prupe.1G169700, Prupe.3G223200, Prupe.4G025600, Prupe.6G110300, Prupe.7G128000, Prupe.8G152500
GO:0016762	MF	xyloglucan:xyloglucosyl transferase activity	0.182885	0.769209	1.6989	6	Prupe.1G169700, Prupe.3G223200, Prupe.4G025600, Prupe.6G110300, Prupe.7G128000, Prupe.8G152500
GO:0032440	MF	2-alkenal reductase [NAD(P)+] activity	0.18345	0.769498	1.69581	3	Prupe.1G543700, Prupe.6G211500, Prupe.7G268900
GO:0030001	BP	metal ion transport	0.187266	0.777818	1.67522	18	Prupe.1G078700, Prupe.1G151700, Prupe.1G323100, Prupe.1G492500, Prupe.1G511200, Prupe.1G558400, Prupe.2G294700, Prupe.2G320300, Prupe.4G005100, Prupe.4G117100, Prupe.4G241700, Prupe.5G005800, Prupe.5G148500, Prupe.6G007500, Prupe.6G030400, Prupe.6G179300, Prupe.6G321400, Prupe.6G329100
GO:0010200	BP	response to chitin	0.187406	0.777818	1.67448	5	Prupe.3G098100, Prupe.6G084100, Prupe.6G286000, Prupe.8G087900, Prupe.8G174800
GO:0005876	CC	spindle microtubule	0.187438	0.777818	1.67431	2	Prupe.1G443900, Prupe.2G138600
GO:0008878	MF	glucose-1-phosphate adenylyltransferase activity	0.187035	0.777818	1.67646	2	Prupe.7G270900, Prupe.8G093400
GO:0015860	BP	purine nucleoside transmembrane transport	0.193306	0.787292	1.64348	3	Prupe.1G525800, Prupe.4G179000, Prupe.5G048000
GO:0045736	BP	negative regulation of cyclin-dependent protein serine/threonine kinase activity	0.193374	0.787292	1.64313	2	Prupe.7G135000, Prupe.8G122300
GO:0045487	BP	gibberellin catabolic process	0.194624	0.787292	1.63669	2	Prupe.3G006700, Prupe.4G080700
GO:0031222	BP	arabinan catabolic process	0.194794	0.787292	1.63581	2	Prupe.1G513200, Prupe.8G270800
GO:0045493	BP	xylan catabolic process	0.194794	0.787292	1.63581	2	Prupe.1G513200, Prupe.8G270800
GO:0006525	BP	arginine metabolic process	0.193894	0.787292	1.64044	1	Prupe.3G094600
GO:0015211	MF	purine nucleoside transmembrane transporter activity	0.193306	0.787292	1.64348	3	Prupe.1G525800, Prupe.4G179000, Prupe.5G048000
GO:0052634	MF	C-19 gibberellin 2-beta-dioxygenase activity	0.194624	0.787292	1.63669	2	Prupe.3G006700, Prupe.4G080700
GO:0009044	MF	xylan 1,4-beta-xylosidase activity	0.194794	0.787292	1.63581	2	Prupe.1G513200, Prupe.8G270800
GO:0003992	MF	N2-acetyl-L-ornithine:2-oxoglutarate 5-aminotransferase activity	0.193894	0.787292	1.64044	1	Prupe.3G094600
GO:0010143	BP	cutin biosynthetic process	0.197869	0.789814	1.62015	3	Prupe.1G264300, Prupe.6G272900, Prupe.8G108400
GO:0019853	BP	L-ascorbic acid biosynthetic process	0.198233	0.789814	1.61831	3	Prupe.1G343000, Prupe.1G450800, Prupe.3G055000
GO:0006538	BP	glutamate catabolic process	0.195995	0.789814	1.62967	2	Prupe.1G339900, Prupe.3G016000
GO:0006469	BP	negative regulation of protein kinase activity	0.199489	0.789814	1.612	2	Prupe.7G135000, Prupe.8G122300
GO:0010133	BP	proline catabolic process to glutamate	0.197067	0.789814	1.62421	1	Prupe.3G243500
GO:0004860	MF	protein kinase inhibitor activity	0.199489	0.789814	1.612	2	Prupe.7G135000, Prupe.8G122300
GO:0052894	MF	norspermine:oxygen oxidoreductase activity	0.198639	0.789814	1.61627	1	Prupe.7G209800
GO:0052901	MF	spermine:oxygen oxidoreductase (spermidine-forming) activity	0.198639	0.789814	1.61627	1	Prupe.7G209800
GO:0070574	BP	cadmium ion transmembrane transport	0.203414	0.791158	1.59251	2	Prupe.1G078700, Prupe.1G492500
GO:0080142	BP	regulation of salicylic acid biosynthetic process	0.204228	0.791158	1.58852	2	Prupe.4G276500, Prupe.5G223600
GO:0032147	BP	activation of protein kinase activity	0.204417	0.791158	1.5876	2	Prupe.3G140300, Prupe.3G257100
GO:0010618	BP	aerenchyma formation	0.202768	0.791158	1.59569	1	Prupe.4G276500
GO:0046872	MF	metal ion binding	0.201319	0.791158	1.60286	258	Prupe.1G011900, Prupe.1G012000, Prupe.1G012100, Prupe.1G021500, Prupe.1G036400, Prupe.1G036700, Prupe.1G060900, Prupe.1G078700, Prupe.1G150700, Prupe.1G151700, Prupe.1G227400, Prupe.1G229700, Prupe.1G230500, Prupe.1G239900, Prupe.1G246400, Prupe.1G272300, Prupe.1G291500, Prupe.1G291800, Prupe.1G292400, Prupe.1G292500, Prupe.1G296300, Prupe.1G296600, Prupe.1G296900, Prupe.1G323100, Prupe.1G336800,…
GO:0015086	MF	cadmium ion transmembrane transporter activity	0.203414	0.791158	1.59251	2	Prupe.1G078700, Prupe.1G492500
GO:0030295	MF	protein kinase activator activity	0.204417	0.791158	1.5876	2	Prupe.3G140300, Prupe.3G257100
GO:0004096	MF	catalase activity	0.2018	0.791158	1.60048	1	Prupe.6G018300
GO:0036361	MF	racemase activity, acting on amino acids and derivatives	0.202796	0.791158	1.59556	1	Prupe.3G081000
GO:0009625	BP	response to insect	0.206438	0.791782	1.57775	1	Prupe.4G276500
GO:1900367	BP	positive regulation of defense response to insect	0.206438	0.791782	1.57775	1	Prupe.4G276500
GO:0009827	BP	plant-type cell wall modification	0.207129	0.791782	1.57442	1	Prupe.2G279700
GO:0005775	CC	vacuolar lumen	0.20693	0.791782	1.57537	1	Prupe.2G277900
GO:0016157	MF	sucrose synthase activity	0.205187	0.791782	1.58383	2	Prupe.1G483200, Prupe.5G241700
GO:0010023	BP	proanthocyanidin biosynthetic process	0.207778	0.792315	1.57128	1	Prupe.5G086700
GO:0019310	BP	inositol catabolic process	0.210402	0.792581	1.55874	2	Prupe.1G343000, Prupe.3G055000
GO:0060548	BP	negative regulation of cell death	0.208475	0.792581	1.56794	1	Prupe.6G333400
GO:1905775	BP	negative regulation of DNA helicase activity	0.209406	0.792581	1.56348	1	Prupe.8G031700
GO:0090575	CC	RNA polymerase II transcription regulator complex	0.209553	0.792581	1.56278	4	Prupe.5G175200, Prupe.7G039800, Prupe.7G039900, Prupe.7G040100
GO:0050113	MF	inositol oxygenase activity	0.210402	0.792581	1.55874	2	Prupe.1G343000, Prupe.3G055000
GO:0022900	BP	electron transport chain	0.234454	0.796151	1.4505	20	Prupe.1G156200, Prupe.1G394200, Prupe.1G441800, Prupe.1G562300, Prupe.2G133000, Prupe.3G062100, Prupe.3G099600, Prupe.3G112300, Prupe.3G261600, Prupe.3G304200, Prupe.4G205500, Prupe.4G270100, Prupe.5G093800, Prupe.5G128300, Prupe.5G242500, Prupe.7G246200, Prupe.7G246300, Prupe.7G246400, Prupe.7G246500, Prupe.8G016000
GO:0045893	BP	positive regulation of transcription, DNA-templated	0.248445	0.796151	1.39253	18	Prupe.1G371500, Prupe.1G378200, Prupe.1G447400, Prupe.1G523000, Prupe.2G036500, Prupe.2G146500, Prupe.2G146600, Prupe.2G194400, Prupe.2G212900, Prupe.3G060900, Prupe.3G125500, Prupe.3G149200, Prupe.4G172000, Prupe.5G131900, Prupe.6G128900, Prupe.7G112200, Prupe.7G163600, Prupe.8G227500
GO:0009408	BP	response to heat	0.243787	0.796151	1.41146	9	Prupe.1G407100, Prupe.2G243800, Prupe.3G005100, Prupe.4G140900, Prupe.6G066100, Prupe.6G066300, Prupe.6G066400, Prupe.6G286000, Prupe.7G133600
GO:0006520	BP	cellular amino acid metabolic process	0.21648	0.796151	1.53026	7	Prupe.3G081000, Prupe.3G133000, Prupe.3G133100, Prupe.4G086600, Prupe.4G087100, Prupe.6G116600, Prupe.6G202600
GO:0000226	BP	microtubule cytoskeleton organization	0.256889	0.796151	1.35911	7	Prupe.1G135600, Prupe.1G226800, Prupe.1G384400, Prupe.1G390100, Prupe.3G269300, Prupe.5G099500, Prupe.6G212700
GO:0006004	BP	fucose metabolic process	0.215822	0.796151	1.5333	6	Prupe.1G294000, Prupe.1G503400, Prupe.2G005200, Prupe.2G101700, Prupe.3G248200, Prupe.4G064100
GO:0010466	BP	negative regulation of peptidase activity	0.235622	0.796151	1.44553	6	Prupe.1G032000, Prupe.1G032400, Prupe.1G032500, Prupe.1G032700, Prupe.I000200, Prupe.I000300
GO:0030422	BP	production of siRNA involved in RNA interference	0.225832	0.796151	1.48796	5	Prupe.1G132100, Prupe.3G213200, Prupe.4G219300, Prupe.4G219500, Prupe.8G202000
GO:0051259	BP	protein complex oligomerization	0.23841	0.796151	1.43376	5	Prupe.1G407100, Prupe.2G243800, Prupe.6G066100, Prupe.6G066300, Prupe.6G066400
GO:0016126	BP	sterol biosynthetic process	0.247292	0.796151	1.39719	5	Prupe.2G112800, Prupe.2G113600, Prupe.6G216100, Prupe.7G050800, Prupe.7G187000
GO:0048285	BP	organelle fission	0.214098	0.796151	1.54132	4	Prupe.1G333900, Prupe.2G040000, Prupe.2G188500, Prupe.7G015100
GO:0019432	BP	triglyceride biosynthetic process	0.234147	0.796151	1.45181	4	Prupe.2G188400, Prupe.3G140400, Prupe.4G257800, Prupe.4G258100
GO:0009926	BP	auxin polar transport	0.235995	0.796151	1.44394	3	Prupe.5G233100, Prupe.7G031400, Prupe.8G018200
GO:0010256	BP	endomembrane system organization	0.264179	0.796151	1.33113	3	Prupe.1G146100, Prupe.1G205000, Prupe.1G578700
GO:0006672	BP	ceramide metabolic process	0.267085	0.796151	1.32019	3	Prupe.1G273700, Prupe.1G274100, Prupe.4G048000
GO:0006820	BP	anion transport	0.219163	0.796151	1.51794	2	Prupe.3G077900, Prupe.8G170400
GO:0072659	BP	protein localization to plasma membrane	0.22388	0.796151	1.49665	2	Prupe.1G485400, Prupe.1G485600
GO:0009630	BP	gravitropism	0.233339	0.796151	1.45526	2	Prupe.1G222800, Prupe.1G338700
GO:0000911	BP	cytokinesis by cell plate formation	0.235699	0.796151	1.4452	2	Prupe.4G180200, Prupe.6G326100
GO:0005978	BP	glycogen biosynthetic process	0.255528	0.796151	1.36442	2	Prupe.7G270900, Prupe.8G093400
GO:0010417	BP	glucuronoxylan biosynthetic process	0.261914	0.796151	1.33974	2	Prupe.4G201700, Prupe.6G239800
GO:0048731	BP	system development	0.265613	0.796151	1.32572	2	Prupe.1G327000, Prupe.1G560100
GO:0051923	BP	sulfation	0.26873	0.796151	1.31405	2	Prupe.2G043800, Prupe.2G072600
GO:0009831	BP	plant-type cell wall modification involved in multidimensional cell growth	0.213442	0.796151	1.54439	1	Prupe.1G110100
GO:0015811	BP	L-cystine transport	0.215993	0.796151	1.53251	1	Prupe.3G298400
GO:0015787	BP	UDP-glucuronic acid transmembrane transport	0.220831	0.796151	1.51036	1	Prupe.7G247800
GO:0010508	BP	positive regulation of autophagy	0.221727	0.796151	1.50631	1	Prupe.6G286000
GO:0051607	BP	defense response to virus	0.223382	0.796151	1.49887	1	Prupe.8G202000
GO:2001022	BP	positive regulation of response to DNA damage stimulus	0.226044	0.796151	1.48703	1	Prupe.7G076100
GO:0010106	BP	cellular response to iron ion starvation	0.22689	0.796151	1.48329	1	Prupe.2G085600
GO:0035195	BP	gene silencing by miRNA	0.229275	0.796151	1.47283	1	Prupe.6G112800
GO:0071329	BP	cellular response to sucrose stimulus	0.229275	0.796151	1.47283	1	Prupe.6G112800
GO:0051639	BP	actin filament network formation	0.236799	0.796151	1.44054	1	Prupe.8G190200
GO:0090059	BP	protoxylem development	0.245241	0.796151	1.40552	1	Prupe.1G012100
GO:0006750	BP	glutathione biosynthetic process	0.245243	0.796151	1.40551	1	Prupe.5G099600
GO:0009652	BP	thigmotropism	0.245948	0.796151	1.40264	1	Prupe.6G229300
GO:1904825	BP	protein localization to microtubule plus-end	0.245948	0.796151	1.40264	1	Prupe.6G229300
GO:0051513	BP	regulation of monopolar cell growth	0.249157	0.796151	1.38967	1	Prupe.8G233400
GO:0045491	BP	xylan metabolic process	0.249685	0.796151	1.38756	1	Prupe.1G582100
GO:0007130	BP	synaptonemal complex assembly	0.251145	0.796151	1.38173	1	Prupe.2G007300
GO:0051177	BP	meiotic sister chromatid cohesion	0.251145	0.796151	1.38173	1	Prupe.2G007300
GO:0010310	BP	regulation of hydrogen peroxide metabolic process	0.25295	0.796151	1.37457	1	Prupe.4G276500
GO:0006075	BP	(1->3)-beta-D-glucan biosynthetic process	0.255142	0.796151	1.36594	1	Prupe.6G014400
GO:0071456	BP	cellular response to hypoxia	0.257888	0.796151	1.35523	1	Prupe.1G087800
GO:0032784	BP	regulation of DNA-templated transcription, elongation	0.26301	0.796151	1.33556	1	Prupe.2G047200
GO:0032465	BP	regulation of cytokinesis	0.264543	0.796151	1.32975	1	Prupe.1G443900
GO:0051762	BP	sesquiterpene biosynthetic process	0.265966	0.796151	1.32439	1	Prupe.6G287000
GO:0006333	BP	chromatin assembly or disassembly	0.267009	0.796151	1.32047	1	Prupe.1G320600
GO:0006949	BP	syncytium formation	0.267539	0.796151	1.31849	1	Prupe.3G155600
GO:0010120	BP	camalexin biosynthetic process	0.26776	0.796151	1.31766	1	Prupe.6G286000
GO:0043693	BP	monoterpene biosynthetic process	0.268057	0.796151	1.31655	1	Prupe.4G030400
GO:0015671	BP	oxygen transport	0.269316	0.796151	1.31187	1	Prupe.8G107300
GO:0009405	BP	pathogenesis	0.269316	0.796151	1.31187	1	Prupe.2G097700
GO:0030418	BP	nicotianamine biosynthetic process	0.269316	0.796151	1.31187	1	Prupe.6G313000
GO:0015741	BP	fumarate transport	0.269317	0.796151	1.31187	1	Prupe.2G034900
GO:0015744	BP	succinate transport	0.269317	0.796151	1.31187	1	Prupe.2G034900
GO:0000778	CC	condensed nuclear chromosome kinetochore	0.226676	0.796151	1.48423	2	Prupe.2G254200, Prupe.3G189400
GO:0005815	CC	microtubule organizing center	0.2646	0.796151	1.32954	2	Prupe.1G390100, Prupe.6G229300
GO:0030054	CC	cell junction	0.223858	0.796151	1.49674	1	Prupe.2G105700
GO:0033597	CC	mitotic checkpoint complex	0.240656	0.796151	1.42439	1	Prupe.1G281000
GO:1990298	CC	bub1-bub3 complex	0.240656	0.796151	1.42439	1	Prupe.1G281000
GO:0034990	CC	nuclear mitotic cohesin complex	0.251145	0.796151	1.38173	1	Prupe.2G007300
GO:0034991	CC	nuclear meiotic cohesin complex	0.251145	0.796151	1.38173	1	Prupe.2G007300
GO:0012506	CC	vesicle membrane	0.252512	0.796151	1.3763	1	Prupe.6G245600
GO:0000148	CC	1,3-beta-D-glucan synthase complex	0.255142	0.796151	1.36594	1	Prupe.6G014400
GO:0055038	CC	recycling endosome membrane	0.255748	0.796151	1.36356	1	Prupe.3G233400
GO:0032432	CC	actin filament bundle	0.264456	0.796151	1.33008	1	Prupe.8G190200
GO:0032133	CC	chromosome passenger complex	0.264543	0.796151	1.32975	1	Prupe.1G443900
GO:0035371	CC	microtubule plus-end	0.266985	0.796151	1.32056	1	Prupe.6G229300
GO:0019897	CC	extrinsic component of plasma membrane	0.269316	0.796151	1.31187	1	Prupe.7G192600
GO:0004252	MF	serine-type endopeptidase activity	0.265738	0.796151	1.32524	17	Prupe.1G357500, Prupe.1G491400, Prupe.1G507800, Prupe.2G035100, Prupe.2G151900, Prupe.2G152000, Prupe.2G242000, Prupe.2G242100, Prupe.2G242400, Prupe.2G285500, Prupe.3G032200, Prupe.5G085700, Prupe.5G133500, Prupe.6G031400, Prupe.6G224600, Prupe.6G356800, Prupe.7G197100
GO:0030599	MF	pectinesterase activity	0.251863	0.796151	1.37887	13	Prupe.1G178400, Prupe.1G529500, Prupe.2G278200, Prupe.2G278300, Prupe.2G310600, Prupe.3G185700, Prupe.5G048600, Prupe.5G069600, Prupe.6G318500, Prupe.7G190300, Prupe.7G190700, Prupe.8G263900, Prupe.8G264100
GO:0030414	MF	peptidase inhibitor activity	0.235622	0.796151	1.44553	6	Prupe.1G032000, Prupe.1G032400, Prupe.1G032500, Prupe.1G032700, Prupe.I000200, Prupe.I000300
GO:0004144	MF	diacylglycerol O-acyltransferase activity	0.219755	0.796151	1.51524	4	Prupe.2G188400, Prupe.3G140400, Prupe.4G257800, Prupe.4G258100
GO:0004439	MF	phosphatidylinositol-4,5-bisphosphate 5-phosphatase activity	0.225358	0.796151	1.49006	3	Prupe.1G384600, Prupe.6G249400, Prupe.8G236900
GO:0003688	MF	DNA replication origin binding	0.230752	0.796151	1.46641	3	Prupe.1G438300, Prupe.6G241500, Prupe.8G031700
GO:0035539	MF	8-oxo-7,8-dihydrodeoxyguanosine triphosphate pyrophosphatase activity	0.212275	0.796151	1.54987	2	Prupe.1G302900, Prupe.1G303000
GO:0002094	MF	polyprenyltransferase activity	0.217072	0.796151	1.52753	2	Prupe.1G346500, Prupe.6G058100
GO:0015369	MF	calcium:proton antiporter activity	0.230089	0.796151	1.46929	2	Prupe.3G125200, Prupe.3G192400
GO:0015184	MF	L-cystine transmembrane transporter activity	0.215993	0.796151	1.53251	1	Prupe.3G298400
GO:0003839	MF	gamma-glutamylcyclotransferase activity	0.220767	0.796151	1.51065	1	Prupe.1G456300
GO:0005461	MF	UDP-glucuronic acid transmembrane transporter activity	0.220831	0.796151	1.51036	1	Prupe.7G247800
GO:0005462	MF	UDP-N-acetylglucosamine transmembrane transporter activity	0.220831	0.796151	1.51036	1	Prupe.7G247800
GO:0016401	MF	palmitoyl-CoA oxidase activity	0.221693	0.796151	1.50646	1	Prupe.7G067100
GO:0004174	MF	electron-transferring-flavoprotein dehydrogenase activity	0.223543	0.796151	1.49815	1	Prupe.2G072100
GO:0042283	MF	dolichyl pyrophosphate Glc1Man9GlcNAc2 alpha-1,3-glucosyltransferase activity	0.225944	0.796151	1.48747	1	Prupe.2G117600
GO:0003855	MF	3-dehydroquinate dehydratase activity	0.226989	0.796151	1.48286	1	Prupe.6G166100
GO:0004764	MF	shikimate 3-dehydrogenase (NADP+) activity	0.226989	0.796151	1.48286	1	Prupe.6G166100
GO:0004534	MF	5'-3' exoribonuclease activity	0.231351	0.796151	1.46382	1	Prupe.6G141200
GO:0004781	MF	sulfate adenylyltransferase (ATP) activity	0.236653	0.796151	1.44116	1	Prupe.1G023000
GO:0010280	MF	UDP-L-rhamnose synthase activity	0.241138	0.796151	1.42239	1	Prupe.3G170800
GO:0050377	MF	UDP-glucose 4,6-dehydratase activity	0.241138	0.796151	1.42239	1	Prupe.3G170800
GO:0016656	MF	monodehydroascorbate reductase (NADH) activity	0.241731	0.796151	1.41993	1	Prupe.4G189300
GO:0018580	MF	nitronate monooxygenase activity	0.243854	0.796151	1.41118	1	Prupe.8G064000
GO:0047274	MF	galactinol-sucrose galactosyltransferase activity	0.24918	0.796151	1.38958	1	Prupe.3G289900
GO:0003843	MF	1,3-beta-D-glucan synthase activity	0.255142	0.796151	1.36594	1	Prupe.6G014400
GO:0046577	MF	long-chain-alcohol oxidase activity	0.257811	0.796151	1.35553	1	Prupe.8G219700
GO:0008107	MF	galactoside 2-alpha-L-fucosyltransferase activity	0.262437	0.796151	1.33774	1	Prupe.1G278500
GO:0050105	MF	L-gulonolactone oxidase activity	0.264362	0.796151	1.33044	1	Prupe.1G450800
GO:0035174	MF	histone serine kinase activity	0.264543	0.796151	1.32975	1	Prupe.1G443900
GO:0047498	MF	calcium-dependent phospholipase A2 activity	0.264936	0.796151	1.32827	1	Prupe.1G066500
GO:0009975	MF	cyclase activity	0.265966	0.796151	1.32439	1	Prupe.6G287000
GO:0042625	MF	ATPase-coupled ion transmembrane transporter activity	0.267241	0.796151	1.3196	1	Prupe.6G005500
GO:0046524	MF	sucrose-phosphate synthase activity	0.267572	0.796151	1.31837	1	Prupe.1G483200
GO:0004142	MF	diacylglycerol cholinephosphotransferase activity	0.268286	0.796151	1.3157	1	Prupe.3G087500
GO:0045431	MF	flavonol synthase activity	0.268661	0.796151	1.31431	1	Prupe.1G502700
GO:0009824	MF	AMP dimethylallyltransferase activity	0.268844	0.796151	1.31362	1	Prupe.1G312400
GO:0102293	MF	pheophytinase b activity	0.269219	0.796151	1.31223	1	Prupe.8G235600
GO:0030775	MF	glucuronoxylan 4-O-methyltransferase activity	0.269311	0.796151	1.31189	1	Prupe.1G582100
GO:0005344	MF	oxygen carrier activity	0.269316	0.796151	1.31187	1	Prupe.8G107300
GO:0019825	MF	oxygen binding	0.269316	0.796151	1.31187	1	Prupe.8G107300
GO:0030410	MF	nicotianamine synthase activity	0.269316	0.796151	1.31187	1	Prupe.6G313000
GO:0005199	MF	structural constituent of cell wall	0.269317	0.796151	1.31187	1	Prupe.1G182200
GO:0005811	CC	lipid droplet	0.270252	0.797397	1.3084	4	Prupe.3G026200, Prupe.3G026400, Prupe.3G026700, Prupe.3G026800
GO:0043021	MF	ribonucleoprotein complex binding	0.271541	0.799681	1.30364	2	Prupe.8G015200, Prupe.8G015700
GO:1900459	BP	positive regulation of brassinosteroid mediated signaling pathway	0.272246	0.800239	1.30105	1	Prupe.5G091700
GO:1900458	BP	negative regulation of brassinosteroid mediated signaling pathway	0.273296	0.801575	1.2972	1	Prupe.8G087900
GO:0052865	BP	1-deoxy-D-xylulose 5-phosphate biosynthetic process	0.274767	0.801575	1.29183	1	Prupe.6G204700
GO:0008661	MF	1-deoxy-D-xylulose-5-phosphate synthase activity	0.274767	0.801575	1.29183	1	Prupe.6G204700
GO:0016744	MF	transferase activity, transferring aldehyde or ketonic groups	0.274767	0.801575	1.29183	1	Prupe.6G204700
GO:0007017	BP	microtubule-based process	0.275816	0.80213	1.28802	6	Prupe.3G269300, Prupe.4G183100, Prupe.5G099500, Prupe.6G142700, Prupe.6G212700, Prupe.7G240100
GO:0035435	BP	phosphate ion transmembrane transport	0.276727	0.80213	1.28472	3	Prupe.1G278700, Prupe.3G264100, Prupe.8G067800
GO:0051017	BP	actin filament bundle assembly	0.280713	0.80213	1.27042	3	Prupe.1G422200, Prupe.6G181100, Prupe.8G190200
GO:0008272	BP	sulfate transport	0.28581	0.80213	1.25243	3	Prupe.1G558300, Prupe.2G279100, Prupe.8G067800
GO:1902358	BP	sulfate transmembrane transport	0.28581	0.80213	1.25243	3	Prupe.1G558300, Prupe.2G279100, Prupe.8G067800
GO:0016571	BP	histone methylation	0.279448	0.80213	1.27494	2	Prupe.1G216000, Prupe.7G185900
GO:0006203	BP	dGTP catabolic process	0.28387	0.80213	1.25924	2	Prupe.1G302900, Prupe.1G303000
GO:0007052	BP	mitotic spindle organization	0.28516	0.80213	1.2547	2	Prupe.1G443900, Prupe.1G532000
GO:1903862	BP	positive regulation of oxidative phosphorylation	0.279772	0.80213	1.27378	1	Prupe.6G232800
GO:0090116	BP	C-5 methylation of cytosine	0.282678	0.80213	1.26345	1	Prupe.6G011600
GO:0009554	BP	megasporogenesis	0.282875	0.80213	1.26275	1	Prupe.2G134900
GO:0009862	BP	systemic acquired resistance, salicylic acid mediated signaling pathway	0.283623	0.80213	1.26011	1	Prupe.4G276500
GO:0031087	BP	deadenylation-independent decapping of nuclear-transcribed mRNA	0.28481	0.80213	1.25593	1	Prupe.6G135600
GO:0015116	MF	sulfate transmembrane transporter activity	0.28581	0.80213	1.25243	3	Prupe.1G558300, Prupe.2G279100, Prupe.8G067800
GO:0046556	MF	alpha-L-arabinofuranosidase activity	0.282047	0.80213	1.26568	2	Prupe.1G513200, Prupe.8G270800
GO:0008574	MF	ATP-dependent microtubule motor activity, plus-end-directed	0.283594	0.80213	1.26021	2	Prupe.4G231600, Prupe.5G214600
GO:0004618	MF	phosphoglycerate kinase activity	0.279772	0.80213	1.27378	1	Prupe.6G232800
GO:0043813	MF	phosphatidylinositol-3,5-bisphosphate 5-phosphatase activity	0.281825	0.80213	1.26647	1	Prupe.1G384600
GO:0003886	MF	DNA (cytosine-5-)-methyltransferase activity	0.282678	0.80213	1.26345	1	Prupe.6G011600
GO:0003999	MF	adenine phosphoribosyltransferase activity	0.284829	0.80213	1.25587	1	Prupe.1G482300
GO:0051010	MF	microtubule plus-end binding	0.285238	0.80213	1.25443	1	Prupe.6G229300
GO:0010215	BP	cellulose microfibril organization	0.286678	0.802364	1.2494	3	Prupe.3G250400, Prupe.5G207900, Prupe.6G360900
GO:0005227	MF	calcium activated cation channel activity	0.286928	0.802364	1.24852	2	Prupe.4G086300, Prupe.5G024400
GO:0009741	BP	response to brassinosteroid	0.287504	0.802529	1.24652	2	Prupe.1G155600, Prupe.8G087900
GO:0016844	MF	strictosidine synthase activity	0.288424	0.803652	1.24332	2	Prupe.1G192200, Prupe.7G179100
GO:0016485	BP	protein processing	0.289918	0.806367	1.23816	2	Prupe.3G032200, Prupe.8G122200
GO:0045330	MF	aspartyl esterase activity	0.291152	0.808351	1.23391	12	Prupe.1G178400, Prupe.1G529500, Prupe.2G278200, Prupe.2G278300, Prupe.2G310600, Prupe.3G185700, Prupe.5G069600, Prupe.6G318500, Prupe.7G190300, Prupe.7G190700, Prupe.8G263900, Prupe.8G264100
GO:0000808	CC	origin recognition complex	0.292303	0.810098	1.22996	1	Prupe.1G438300
GO:0009959	BP	negative gravitropism	0.293033	0.810673	1.22747	2	Prupe.4G067400, Prupe.6G042900
GO:0000266	BP	mitochondrial fission	0.294695	0.812573	1.22182	4	Prupe.1G333900, Prupe.2G040000, Prupe.2G188500, Prupe.7G015100
GO:0008378	MF	galactosyltransferase activity	0.294767	0.812573	1.22157	4	Prupe.1G110700, Prupe.4G020000, Prupe.5G133400, Prupe.6G127500
GO:0008725	MF	DNA-3-methyladenine glycosylase activity	0.29537	0.812792	1.21953	2	Prupe.4G120400, Prupe.4G125700
GO:0046856	BP	phosphatidylinositol dephosphorylation	0.296417	0.813185	1.21599	3	Prupe.1G384600, Prupe.6G249400, Prupe.8G236900
GO:0000792	CC	heterochromatin	0.296561	0.813185	1.2155	1	Prupe.5G140900
GO:0010267	BP	production of ta-siRNAs involved in RNA interference	0.298699	0.813299	1.20832	1	Prupe.8G202000
GO:0000417	CC	HIR complex	0.298506	0.813299	1.20896	1	Prupe.8G049400
GO:0016688	MF	L-ascorbate peroxidase activity	0.298311	0.813299	1.20962	2	Prupe.6G242200, Prupe.7G171100
GO:0004619	MF	phosphoglycerate mutase activity	0.297143	0.813299	1.21354	1	Prupe.1G512500
GO:0030658	CC	transport vesicle membrane	0.301332	0.819031	1.19954	1	Prupe.3G233400
GO:0006887	BP	exocytosis	0.302471	0.819634	1.19577	6	Prupe.2G226200, Prupe.3G018000, Prupe.5G205500, Prupe.6G247200, Prupe.7G000700, Prupe.7G093400
GO:0000795	CC	synaptonemal complex	0.30261	0.819634	1.19531	1	Prupe.2G007300
GO:0000103	BP	sulfate assimilation	0.307939	0.820026	1.17785	2	Prupe.1G023000, Prupe.7G004400
GO:0052324	BP	plant-type cell wall cellulose biosynthetic process	0.309268	0.820026	1.17355	2	Prupe.3G250400, Prupe.5G207900
GO:0009854	BP	oxidative photosynthetic carbon pathway	0.307226	0.820026	1.18017	1	Prupe.3G037200
GO:0071457	BP	cellular response to ozone	0.308862	0.820026	1.17486	1	Prupe.6G112800
GO:0071484	BP	cellular response to light intensity	0.308862	0.820026	1.17486	1	Prupe.6G112800
GO:0030307	BP	positive regulation of cell growth	0.310152	0.820026	1.17069	1	Prupe.7G192600
GO:0005819	CC	spindle	0.308519	0.820026	1.17597	4	Prupe.1G226800, Prupe.3G140300, Prupe.3G257100, Prupe.6G229300
GO:0031464	CC	Cul4A-RING E3 ubiquitin ligase complex	0.310263	0.820026	1.17033	3	Prupe.1G452300, Prupe.3G068300, Prupe.3G068400
GO:0005884	CC	actin filament	0.308485	0.820026	1.17608	1	Prupe.8G190200
GO:0005516	MF	calmodulin binding	0.31068	0.820026	1.16899	10	Prupe.1G460100, Prupe.2G026200, Prupe.2G317600, Prupe.3G046800, Prupe.5G223600, Prupe.6G062500, Prupe.6G120700, Prupe.6G239200, Prupe.7G090800, Prupe.7G271400
GO:0016811	MF	hydrolase activity, acting on carbon-nitrogen (but not peptide) bonds, in linear amides	0.308912	0.820026	1.1747	3	Prupe.1G273700, Prupe.1G274100, Prupe.4G048000
GO:0052852	MF	very-long-chain-(S)-2-hydroxy-acid oxidase activity	0.307226	0.820026	1.18017	1	Prupe.3G037200
GO:0052853	MF	long-chain-(S)-2-hydroxy-long-chain-acid oxidase activity	0.307226	0.820026	1.18017	1	Prupe.3G037200
GO:0052854	MF	medium-chain-(S)-2-hydroxy-acid oxidase activity	0.307226	0.820026	1.18017	1	Prupe.3G037200
GO:0045547	MF	dehydrodolichyl diphosphate synthase activity	0.308056	0.820026	1.17747	1	Prupe.6G058100
GO:0042744	BP	hydrogen peroxide catabolic process	0.312452	0.820394	1.16331	14	Prupe.2G260600, Prupe.3G115300, Prupe.4G021100, Prupe.4G056100, Prupe.4G276800, Prupe.6G013200, Prupe.6G013500, Prupe.6G044300, Prupe.6G192000, Prupe.6G223400, Prupe.6G242200, Prupe.7G161900, Prupe.7G171100, Prupe.8G038900
GO:0010105	BP	negative regulation of ethylene-activated signaling pathway	0.312851	0.820394	1.16203	1	Prupe.4G276500
GO:0006425	BP	glutaminyl-tRNA aminoacylation	0.312934	0.820394	1.16176	1	Prupe.8G045400
GO:0004819	MF	glutamine-tRNA ligase activity	0.312934	0.820394	1.16176	1	Prupe.8G045400
GO:0016855	MF	racemase and epimerase activity, acting on amino acids and derivatives	0.313945	0.821658	1.15854	1	Prupe.3G081000
GO:0042026	BP	protein refolding	0.314477	0.821665	1.15684	7	Prupe.2G234200, Prupe.2G234300, Prupe.2G234400, Prupe.7G106500, Prupe.7G106700, Prupe.7G108100, Prupe.7G108500
GO:0030154	BP	cell differentiation	0.315718	0.823519	1.15291	11	Prupe.1G420000, Prupe.1G447400, Prupe.2G212900, Prupe.2G280100, Prupe.3G042300, Prupe.3G060900, Prupe.5G126600, Prupe.5G174200, Prupe.7G201700, Prupe.7G201900, Prupe.7G247600
GO:0071568	MF	UFM1 transferase activity	0.316416	0.823955	1.1507	1	Prupe.7G085600
GO:0010411	BP	xyloglucan metabolic process	0.319671	0.825507	1.14046	6	Prupe.1G169700, Prupe.3G223200, Prupe.4G025600, Prupe.6G110300, Prupe.7G128000, Prupe.8G152500
GO:0070814	BP	hydrogen sulfide biosynthetic process	0.318172	0.825507	1.14516	1	Prupe.7G004400
GO:0019632	BP	shikimate metabolic process	0.319584	0.825507	1.14073	1	Prupe.6G166100
GO:0016324	CC	apical plasma membrane	0.318701	0.825507	1.1435	1	Prupe.6G360900
GO:0090447	MF	glycerol-3-phosphate 2-O-acyltransferase activity	0.318801	0.825507	1.14319	2	Prupe.1G264300, Prupe.6G272900
GO:0097503	BP	sialylation	0.321089	0.826418	1.13604	1	Prupe.6G127500
GO:0008373	MF	sialyltransferase activity	0.321089	0.826418	1.13604	1	Prupe.6G127500
GO:0009751	BP	response to salicylic acid	0.322582	0.827132	1.1314	3	Prupe.3G098100, Prupe.4G276500, Prupe.6G354100
GO:0043067	BP	regulation of programmed cell death	0.322674	0.827132	1.13111	2	Prupe.1G012100, Prupe.1G529800
GO:0003724	MF	RNA helicase activity	0.322965	0.827132	1.13021	7	Prupe.1G368500, Prupe.1G422500, Prupe.2G078200, Prupe.2G078300, Prupe.3G288900, Prupe.8G103900, Prupe.8G104500
GO:0036529	BP	protein deglycation, glyoxal removal	0.326241	0.828135	1.12012	1	Prupe.4G167900
GO:0106046	BP	guanine deglycation, glyoxal removal	0.326241	0.828135	1.12012	1	Prupe.4G167900
GO:0015789	BP	UDP-N-acetylgalactosamine transmembrane transport	0.327221	0.828135	1.11712	1	Prupe.7G247800
GO:1990569	BP	UDP-N-acetylglucosamine transmembrane transport	0.327221	0.828135	1.11712	1	Prupe.7G247800
GO:0015293	MF	symporter activity	0.327626	0.828135	1.11588	11	Prupe.1G233800, Prupe.1G356000, Prupe.1G388700, Prupe.1G444800, Prupe.1G491000, Prupe.1G491100, Prupe.1G491300, Prupe.3G300900, Prupe.4G137000, Prupe.4G277700, Prupe.8G163100
GO:0044389	MF	ubiquitin-like protein ligase binding	0.327539	0.828135	1.11615	2	Prupe.4G222000, Prupe.4G277000
GO:0036524	MF	protein deglycase activity	0.326241	0.828135	1.12012	1	Prupe.4G167900
GO:0005463	MF	UDP-N-acetylgalactosamine transmembrane transporter activity	0.327221	0.828135	1.11712	1	Prupe.7G247800
GO:0008360	BP	regulation of cell shape	0.33021	0.831489	1.10803	3	Prupe.4G167100, Prupe.6G014400, Prupe.7G226500
GO:0016477	BP	cell migration	0.330401	0.831489	1.10745	1	Prupe.6G181100
GO:0036092	BP	phosphatidylinositol-3-phosphate biosynthetic process	0.33056	0.831489	1.10697	1	Prupe.1G384600
GO:0046777	BP	protein autophosphorylation	0.381605	0.8381	0.963368	16	Prupe.1G145600, Prupe.1G269800, Prupe.1G427400, Prupe.1G481600, Prupe.2G063900, Prupe.3G012100, Prupe.3G157900, Prupe.3G251000, Prupe.3G303100, Prupe.4G104500, Prupe.4G104700, Prupe.4G142200, Prupe.6G126100, Prupe.6G228000, Prupe.6G228200, Prupe.7G090800
GO:0042545	BP	cell wall modification	0.382176	0.8381	0.961875	12	Prupe.1G178400, Prupe.1G529500, Prupe.2G278200, Prupe.2G278300, Prupe.2G310600, Prupe.3G185700, Prupe.5G069600, Prupe.6G318500, Prupe.7G190300, Prupe.7G190700, Prupe.8G263900, Prupe.8G264100
GO:0006869	BP	lipid transport	0.379744	0.8381	0.968257	8	Prupe.1G016900, Prupe.4G152200, Prupe.5G119200, Prupe.5G224300, Prupe.5G229600, Prupe.6G292800, Prupe.6G293000, Prupe.8G238000
GO:0000278	BP	mitotic cell cycle	0.335038	0.8381	1.09351	6	Prupe.2G007300, Prupe.2G138600, Prupe.3G140300, Prupe.3G269300, Prupe.5G099500, Prupe.6G212700
GO:0019752	BP	carboxylic acid metabolic process	0.363694	0.8381	1.01144	5	Prupe.1G339900, Prupe.3G016000, Prupe.4G086600, Prupe.4G087100, Prupe.6G202600
GO:0008299	BP	isoprenoid biosynthetic process	0.365541	0.8381	1.00638	4	Prupe.1G346500, Prupe.4G215000, Prupe.6G204700, Prupe.7G187000
GO:0018230	BP	peptidyl-L-cysteine S-palmitoylation	0.337603	0.8381	1.08588	3	Prupe.1G212000, Prupe.1G280400, Prupe.3G002400
GO:0005985	BP	sucrose metabolic process	0.337556	0.8381	1.08602	2	Prupe.1G483200, Prupe.5G241700
GO:0016121	BP	carotene catabolic process	0.34237	0.8381	1.07186	2	Prupe.1G448400, Prupe.1G449100
GO:0010497	BP	plasmodesmata-mediated intercellular transport	0.348174	0.8381	1.05505	2	Prupe.1G048300, Prupe.8G216200
GO:0048653	BP	anther development	0.352315	0.8381	1.04323	2	Prupe.2G134900, Prupe.2G189800
GO:0046653	BP	tetrahydrofolate metabolic process	0.360047	0.8381	1.02152	2	Prupe.1G458900, Prupe.1G539400
GO:0009867	BP	jasmonic acid mediated signaling pathway	0.373483	0.8381	0.984883	2	Prupe.1G012100, Prupe.1G407500
GO:0003374	BP	dynamin family protein polymerization involved in mitochondrial fission	0.381734	0.8381	0.96303	2	Prupe.2G040000, Prupe.7G015100
GO:0031623	BP	receptor internalization	0.381734	0.8381	0.96303	2	Prupe.2G040000, Prupe.7G015100
GO:0050803	BP	regulation of synapse structure or activity	0.381734	0.8381	0.96303	2	Prupe.2G040000, Prupe.7G015100
GO:0009639	BP	response to red or far red light	0.382329	0.8381	0.961473	2	Prupe.4G067400, Prupe.6G042900
GO:0015936	BP	coenzyme A metabolic process	0.343795	0.8381	1.06771	1	Prupe.7G187000
GO:0000038	BP	very long-chain fatty acid metabolic process	0.34405	0.8381	1.06697	1	Prupe.7G067100
GO:1901006	BP	ubiquinone-6 biosynthetic process	0.34606	0.8381	1.06114	1	Prupe.8G025300
GO:0010091	BP	trichome branching	0.350637	0.8381	1.048	1	Prupe.5G131500
GO:0010253	BP	UDP-rhamnose biosynthetic process	0.35133	0.8381	1.04603	1	Prupe.3G170800
GO:0050482	BP	arachidonic acid secretion	0.352141	0.8381	1.04372	1	Prupe.1G066500
GO:0071493	BP	cellular response to UV-B	0.352782	0.8381	1.0419	1	Prupe.6G112800
GO:0006382	BP	adenosine to inosine editing	0.353643	0.8381	1.03947	1	Prupe.2G164500
GO:0009800	BP	cinnamic acid biosynthetic process	0.354195	0.8381	1.03791	1	Prupe.6G104500
GO:0006335	BP	DNA replication-dependent nucleosome assembly	0.355694	0.8381	1.03369	1	Prupe.1G320600
GO:0016926	BP	protein desumoylation	0.358944	0.8381	1.02459	1	Prupe.4G261000
GO:0050829	BP	defense response to Gram-negative bacterium	0.368997	0.8381	0.996966	1	Prupe.4G276500
GO:0032955	BP	regulation of division septum assembly	0.372077	0.8381	0.988653	1	Prupe.3G261900
GO:0010019	BP	chloroplast-nucleus signaling pathway	0.374195	0.8381	0.982977	1	Prupe.4G124800
GO:0051252	BP	regulation of RNA metabolic process	0.374805	0.8381	0.981351	1	Prupe.6G036700
GO:0015709	BP	thiosulfate transport	0.375412	0.8381	0.979732	1	Prupe.8G067800
GO:0071422	BP	succinate transmembrane transport	0.375412	0.8381	0.979732	1	Prupe.8G067800
GO:0010112	BP	regulation of systemic acquired resistance	0.375419	0.8381	0.979713	1	Prupe.1G309800
GO:0010389	BP	regulation of G2/M transition of mitotic cell cycle	0.378212	0.8381	0.972299	1	Prupe.5G003700
GO:0051228	BP	mitotic spindle disassembly	0.379779	0.8381	0.968165	1	Prupe.4G237600
GO:0097352	BP	autophagosome maturation	0.379779	0.8381	0.968165	1	Prupe.4G237600
GO:1990414	BP	replication-born double-strand break repair via sister chromatid exchange	0.379931	0.8381	0.967765	1	Prupe.2G007300
GO:0010044	BP	response to aluminum ion	0.381239	0.8381	0.964328	1	Prupe.6G245600
GO:0036065	BP	fucosylation	0.38197	0.8381	0.962413	1	Prupe.1G278500
GO:1990592	BP	protein K69-linked ufmylation	0.382193	0.8381	0.96183	1	Prupe.7G085600
GO:0000145	CC	exocyst	0.363492	0.8381	1.012	4	Prupe.2G226200, Prupe.3G018000, Prupe.5G205500, Prupe.6G247200
GO:0017119	CC	Golgi transport complex	0.336397	0.8381	1.08946	2	Prupe.4G119200, Prupe.8G015800
GO:0032044	CC	DSIF complex	0.346535	0.8381	1.05977	1	Prupe.2G047200
GO:0000793	CC	condensed chromosome	0.348512	0.8381	1.05408	1	Prupe.3G017700
GO:0000940	CC	condensed chromosome outer kinetochore	0.349736	0.8381	1.05058	1	Prupe.2G138600
GO:0000796	CC	condensin complex	0.351338	0.8381	1.04601	1	Prupe.3G017700
GO:0005875	CC	microtubule associated complex	0.357413	0.8381	1.02886	1	Prupe.6G326100
GO:0035102	CC	PRC1 complex	0.375418	0.8381	0.979716	1	Prupe.3G034000
GO:0008024	CC	cyclin/CDK positive transcription elongation factor complex	0.377329	0.8381	0.974637	1	Prupe.6G162800
GO:0032580	CC	Golgi cisterna membrane	0.38197	0.8381	0.962413	1	Prupe.1G278500
GO:0005515	MF	protein binding	0.351469	0.8381	1.04563	372	Prupe.1G018700, Prupe.1G020000, Prupe.1G054900, Prupe.1G055000, Prupe.1G056100, Prupe.1G061500, Prupe.1G063300, Prupe.1G066300, Prupe.1G072100, Prupe.1G074000, Prupe.1G100100, Prupe.1G107200, Prupe.1G107300, Prupe.1G107400, Prupe.1G134300, Prupe.1G147100, Prupe.1G157900, Prupe.1G158000, Prupe.1G158200, Prupe.1G160300, Prupe.1G161700, Prupe.1G161800, Prupe.1G168400, Prupe.1G177000, Prupe.1G208300,…
GO:0008168	MF	methyltransferase activity	0.372733	0.8381	0.986894	34	Prupe.1G216000, Prupe.1G227100, Prupe.1G375700, Prupe.1G375800, Prupe.1G580000, Prupe.2G107200, Prupe.2G199400, Prupe.2G199600, Prupe.2G199800, Prupe.2G290800, Prupe.3G118900, Prupe.3G119100, Prupe.3G119700, Prupe.3G119800, Prupe.3G120200, Prupe.3G120400, Prupe.3G129000, Prupe.3G129200, Prupe.3G129600, Prupe.3G129800, Prupe.3G235500, Prupe.4G160700, Prupe.5G228500, Prupe.5G228700, Prupe.6G011600,…
GO:0005509	MF	calcium ion binding	0.381794	0.8381	0.962875	32	Prupe.1G023600, Prupe.1G046800, Prupe.1G066500, Prupe.1G384400, Prupe.1G412900, Prupe.1G435600, Prupe.1G436900, Prupe.1G480500, Prupe.1G515200, Prupe.2G146900, Prupe.3G051100, Prupe.3G051200, Prupe.3G125200, Prupe.3G181200, Prupe.3G266000, Prupe.3G303600, Prupe.4G037100, Prupe.4G093300, Prupe.4G093500, Prupe.4G093600, Prupe.4G094100, Prupe.4G119200, Prupe.5G152700, Prupe.5G194800, Prupe.6G298900,…
GO:0016831	MF	carboxy-lyase activity	0.336612	0.8381	1.08883	5	Prupe.1G339900, Prupe.3G016000, Prupe.4G086600, Prupe.4G087100, Prupe.6G202600
GO:0045551	MF	cinnamyl-alcohol dehydrogenase activity	0.362382	0.8381	1.01506	5	Prupe.6G205400, Prupe.6G205900, Prupe.6G207300, Prupe.6G207900, Prupe.6G228800
GO:0047372	MF	acylglycerol lipase activity	0.361392	0.8381	1.01779	4	Prupe.1G439500, Prupe.1G439700, Prupe.1G439800, Prupe.1G440100
GO:0016409	MF	palmitoyltransferase activity	0.358456	0.8381	1.02595	3	Prupe.1G212000, Prupe.1G280400, Prupe.3G002400
GO:0019706	MF	protein-cysteine S-palmitoyltransferase activity	0.358456	0.8381	1.02595	3	Prupe.1G212000, Prupe.1G280400, Prupe.3G002400
GO:0004535	MF	poly(A)-specific ribonuclease activity	0.361449	0.8381	1.01764	3	Prupe.6G123500, Prupe.6G139300, Prupe.6G139800
GO:0010436	MF	carotenoid dioxygenase activity	0.34237	0.8381	1.07186	2	Prupe.1G448400, Prupe.1G449100
GO:0008146	MF	sulfotransferase activity	0.354515	0.8381	1.037	2	Prupe.2G043800, Prupe.2G072600
GO:0004420	MF	hydroxymethylglutaryl-CoA reductase (NADPH) activity	0.343795	0.8381	1.06771	1	Prupe.7G187000
GO:0042282	MF	hydroxymethylglutaryl-CoA reductase activity	0.343795	0.8381	1.06771	1	Prupe.7G187000
GO:0048531	MF	beta-1,3-galactosyltransferase activity	0.345001	0.8381	1.06421	1	Prupe.5G001800
GO:0004316	MF	3-oxoacyl-[acyl-carrier-protein] reductase (NADPH) activity	0.345302	0.8381	1.06334	1	Prupe.1G233400
GO:0102131	MF	3-oxo-glutaryl-[acp] methyl ester reductase activity	0.345302	0.8381	1.06334	1	Prupe.1G233400
GO:0102132	MF	3-oxo-pimeloyl-[acp] methyl ester reductase activity	0.345302	0.8381	1.06334	1	Prupe.1G233400
GO:0004611	MF	phosphoenolpyruvate carboxykinase activity	0.346123	0.8381	1.06096	1	Prupe.6G211000
GO:0004612	MF	phosphoenolpyruvate carboxykinase (ATP) activity	0.346123	0.8381	1.06096	1	Prupe.6G211000
GO:0008460	MF	dTDP-glucose 4,6-dehydratase activity	0.346822	0.8381	1.05894	1	Prupe.3G170800
GO:0003726	MF	double-stranded RNA adenosine deaminase activity	0.353643	0.8381	1.03947	1	Prupe.2G164500
GO:0016841	MF	ammonia-lyase activity	0.354195	0.8381	1.03791	1	Prupe.6G104500
GO:0002083	MF	4-hydroxybenzoate decaprenyltransferase activity	0.357483	0.8381	1.02867	1	Prupe.1G346500
GO:0047293	MF	4-hydroxybenzoate nonaprenyltransferase activity	0.357483	0.8381	1.02867	1	Prupe.1G346500
GO:0046527	MF	glucosyltransferase activity	0.358711	0.8381	1.02524	1	Prupe.6G014400
GO:0010487	MF	thermospermine synthase activity	0.361421	0.8381	1.01771	1	Prupe.1G011700
GO:0003973	MF	(S)-2-hydroxy-acid oxidase activity	0.363162	0.8381	1.01291	1	Prupe.3G037200
GO:0005452	MF	inorganic anion exchanger activity	0.364691	0.8381	1.0087	1	Prupe.3G077900
GO:0004067	MF	asparaginase activity	0.373717	0.8381	0.984257	1	Prupe.1G430400
GO:0008798	MF	beta-aspartyl-peptidase activity	0.373717	0.8381	0.984257	1	Prupe.1G430400
GO:0008428	MF	ribonuclease inhibitor activity	0.374805	0.8381	0.981351	1	Prupe.6G036700
GO:0008948	MF	oxaloacetate decarboxylase activity	0.374805	0.8381	0.981351	1	Prupe.6G036700
GO:0047443	MF	4-hydroxy-4-methyl-2-oxoglutarate aldolase activity	0.374805	0.8381	0.981351	1	Prupe.6G036700
GO:0047746	MF	chlorophyllase activity	0.374924	0.8381	0.981032	1	Prupe.8G235600
GO:0015117	MF	thiosulfate transmembrane transporter activity	0.375412	0.8381	0.979732	1	Prupe.8G067800
GO:0015141	MF	succinate transmembrane transporter activity	0.375412	0.8381	0.979732	1	Prupe.8G067800
GO:0004866	MF	endopeptidase inhibitor activity	0.375418	0.8381	0.979715	1	Prupe.4G155200
GO:0017076	MF	purine nucleotide binding	0.377235	0.8381	0.974886	1	Prupe.6G211000
GO:0046592	MF	polyamine oxidase activity	0.38067	0.8381	0.965822	1	Prupe.7G209800
GO:0009664	BP	plant-type cell wall organization	0.386293	0.840381	0.95116	4	Prupe.1G182200, Prupe.3G265800, Prupe.5G195200, Prupe.6G042000
GO:0006094	BP	gluconeogenesis	0.391532	0.840381	0.937687	3	Prupe.6G076300, Prupe.6G211000, Prupe.6G232800
GO:0001676	BP	long-chain fatty acid metabolic process	0.385214	0.840381	0.953955	2	Prupe.7G067100, Prupe.8G108400
GO:0007163	BP	establishment or maintenance of cell polarity	0.38914	0.840381	0.943816	2	Prupe.6G181100, Prupe.7G226500
GO:0009904	BP	chloroplast accumulation movement	0.397547	0.840381	0.922442	2	Prupe.1G366100, Prupe.2G261200
GO:0043085	BP	positive regulation of catalytic activity	0.384179	0.840381	0.956648	1	Prupe.6G135600
GO:0006168	BP	adenine salvage	0.384873	0.840381	0.954842	1	Prupe.1G482300
GO:0007029	BP	endoplasmic reticulum organization	0.388075	0.840381	0.946557	1	Prupe.2G279400
GO:0009816	BP	defense response to bacterium, incompatible interaction	0.38961	0.840381	0.942609	1	Prupe.4G276500
GO:0010492	BP	maintenance of shoot apical meristem identity	0.390018	0.840381	0.941562	1	Prupe.4G124800
GO:0016094	BP	polyprenol biosynthetic process	0.393321	0.840381	0.933129	1	Prupe.6G058100
GO:0009698	BP	phenylpropanoid metabolic process	0.395246	0.840381	0.928248	1	Prupe.6G104500
GO:0006751	BP	glutathione catabolic process	0.397136	0.840381	0.923477	1	Prupe.1G456300
GO:0015798	BP	myo-inositol transport	0.397744	0.840381	0.921946	1	Prupe.4G083700
GO:0009081	BP	branched-chain amino acid metabolic process	0.397989	0.840381	0.92133	1	Prupe.8G155300
GO:0032588	CC	trans-Golgi network membrane	0.386722	0.840381	0.950048	1	Prupe.3G233400
GO:0032797	CC	SMN complex	0.393772	0.840381	0.931982	1	Prupe.7G003500
GO:0004177	MF	aminopeptidase activity	0.386139	0.840381	0.951557	2	Prupe.1G457300, Prupe.3G044500
GO:0000774	MF	adenyl-nucleotide exchange factor activity	0.392957	0.840381	0.934055	2	Prupe.4G087300, Prupe.6G053300
GO:0016891	MF	endoribonuclease activity, producing 5'-phosphomonoesters	0.392699	0.840381	0.934712	1	Prupe.8G202000
GO:0045548	MF	phenylalanine ammonia-lyase activity	0.395508	0.840381	0.927585	1	Prupe.6G104500
GO:0015018	MF	galactosylgalactosylxylosylprotein 3-beta-glucuronosyltransferase activity	0.395883	0.840381	0.926636	1	Prupe.6G239800
GO:0042285	MF	xylosyltransferase activity	0.395883	0.840381	0.926636	1	Prupe.6G239800
GO:0005366	MF	myo-inositol:proton symporter activity	0.397744	0.840381	0.921946	1	Prupe.4G083700
GO:0052654	MF	L-leucine transaminase activity	0.397989	0.840381	0.92133	1	Prupe.8G155300
GO:0052655	MF	L-valine transaminase activity	0.397989	0.840381	0.92133	1	Prupe.8G155300
GO:0052656	MF	L-isoleucine transaminase activity	0.397989	0.840381	0.92133	1	Prupe.8G155300
GO:0051225	BP	spindle assembly	0.400494	0.843365	0.915057	3	Prupe.3G140300, Prupe.4G000100, Prupe.6G229300
GO:0070370	BP	cellular heat acclimation	0.400113	0.843365	0.916007	1	Prupe.6G286000
GO:0070552	CC	BRISC complex	0.401577	0.843365	0.912357	1	Prupe.6G150100
GO:0030553	MF	cGMP binding	0.401085	0.843365	0.913582	1	Prupe.8G097600
GO:1901537	BP	positive regulation of DNA demethylation	0.403887	0.8449	0.90662	1	Prupe.5G005900
GO:0090406	CC	pollen tube	0.403941	0.8449	0.906487	2	Prupe.3G018000, Prupe.7G166100
GO:0016624	MF	oxidoreductase activity, acting on the aldehyde or oxo group of donors, disulfide as acceptor	0.403043	0.8449	0.908711	1	Prupe.2G230300
GO:0032502	BP	developmental process	0.404498	0.844927	0.905108	9	Prupe.1G005900, Prupe.1G419000, Prupe.2G040300, Prupe.2G227200, Prupe.2G317500, Prupe.3G041800, Prupe.5G131600, Prupe.7G115500, Prupe.7G201000
GO:0009556	BP	microsporogenesis	0.405274	0.845411	0.903191	1	Prupe.2G134900
GO:0006874	BP	cellular calcium ion homeostasis	0.408627	0.847847	0.894952	2	Prupe.3G125200, Prupe.3G192400
GO:0002237	BP	response to molecule of bacterial origin	0.407858	0.847847	0.896837	1	Prupe.3G098100
GO:0050801	BP	ion homeostasis	0.408289	0.847847	0.89578	1	Prupe.3G077900
GO:0030071	BP	regulation of mitotic metaphase/anaphase transition	0.408393	0.847847	0.895525	1	Prupe.4G256900
GO:0016846	MF	carbon-sulfur lyase activity	0.409705	0.84854	0.892317	2	Prupe.1G248200, Prupe.8G041600
GO:0103025	MF	alpha-amylase activity (releasing maltohexaose)	0.410055	0.84854	0.891464	1	Prupe.1G435600
GO:0009058	BP	biosynthetic process	0.420026	0.849866	0.867439	12	Prupe.1G192200, Prupe.1G509100, Prupe.2G176900, Prupe.3G133000, Prupe.3G133100, Prupe.4G252100, Prupe.4G253000, Prupe.7G179100, Prupe.7G270900, Prupe.8G056800, Prupe.8G093400, Prupe.8G156100
GO:0009737	BP	response to abscisic acid	0.416448	0.849866	0.875993	11	Prupe.1G378200, Prupe.1G384600, Prupe.1G413900, Prupe.1G435600, Prupe.2G294400, Prupe.3G005100, Prupe.3G170400, Prupe.6G062500, Prupe.6G280200, Prupe.7G112200, Prupe.7G161200
GO:0009903	BP	chloroplast avoidance movement	0.418507	0.849866	0.871062	2	Prupe.1G366100, Prupe.2G261200
GO:0005992	BP	trehalose biosynthetic process	0.41966	0.849866	0.868312	2	Prupe.2G308300, Prupe.5G176400
GO:0019740	BP	nitrogen utilization	0.421847	0.849866	0.863112	2	Prupe.4G283900, Prupe.6G281900
GO:2000582	BP	positive regulation of ATP-dependent microtubule motor activity, plus-end-directed	0.425741	0.849866	0.853923	2	Prupe.4G183100, Prupe.7G240100
GO:0006657	BP	CDP-choline pathway	0.412453	0.849866	0.885632	1	Prupe.3G087500
GO:0046688	BP	response to copper ion	0.413018	0.849866	0.884263	1	Prupe.6G112800
GO:0031935	BP	regulation of chromatin silencing	0.415101	0.849866	0.879233	1	Prupe.8G049400
GO:0007062	BP	sister chromatid cohesion	0.416266	0.849866	0.876431	1	Prupe.2G007300
GO:0009225	BP	nucleotide-sugar metabolic process	0.418173	0.849866	0.87186	1	Prupe.3G170800
GO:0070212	BP	protein poly-ADP-ribosylation	0.4254	0.849866	0.854724	1	Prupe.3G262700
GO:0046166	BP	glyceraldehyde-3-phosphate biosynthetic process	0.425897	0.849866	0.853558	1	Prupe.6G076300
GO:0000786	CC	nucleosome	0.417262	0.849866	0.87404	8	Prupe.1G169000, Prupe.1G330600, Prupe.2G232200, Prupe.4G054300, Prupe.6G021100, Prupe.6G021700, Prupe.7G028400, Prupe.8G250000
GO:0030286	CC	dynein complex	0.425741	0.849866	0.853923	2	Prupe.4G183100, Prupe.7G240100
GO:0045252	CC	oxoglutarate dehydrogenase complex	0.419402	0.849866	0.868924	1	Prupe.2G230300
GO:0042788	CC	polysomal ribosome	0.420127	0.849866	0.867198	1	Prupe.8G023400
GO:0009574	CC	preprophase band	0.421643	0.849866	0.863596	1	Prupe.6G326100
GO:0000839	CC	Hrd1p ubiquitin ligase ERAD-L complex	0.422031	0.849866	0.862677	1	Prupe.2G273500
GO:0004089	MF	carbonate dehydratase activity	0.426993	0.849866	0.850988	3	Prupe.4G263400, Prupe.6G080400, Prupe.6G104900
GO:0016881	MF	acid-amino acid ligase activity	0.411291	0.849866	0.888454	2	Prupe.4G197000, Prupe.6G226100
GO:0045505	MF	dynein intermediate chain binding	0.425741	0.849866	0.853923	2	Prupe.4G183100, Prupe.7G240100
GO:0051959	MF	dynein light intermediate chain binding	0.425741	0.849866	0.853923	2	Prupe.4G183100, Prupe.7G240100
GO:0008271	MF	secondary active sulfate transmembrane transporter activity	0.427124	0.849866	0.850682	2	Prupe.1G558300, Prupe.2G279100
GO:0015301	MF	anion:anion antiporter activity	0.427124	0.849866	0.850682	2	Prupe.1G558300, Prupe.2G279100
GO:0052692	MF	raffinose alpha-galactosidase activity	0.418	0.849866	0.872274	1	Prupe.7G064000
GO:1990381	MF	ubiquitin-specific protease binding	0.422031	0.849866	0.862677	1	Prupe.2G273500
GO:0030332	MF	cyclin binding	0.42503	0.849866	0.855596	1	Prupe.5G003700
GO:1990404	MF	protein ADP-ribosylase activity	0.4254	0.849866	0.854724	1	Prupe.3G262700
GO:0004807	MF	triose-phosphate isomerase activity	0.425897	0.849866	0.853558	1	Prupe.6G076300
GO:0070973	BP	protein localization to endoplasmic reticulum exit site	0.429371	0.849999	0.845434	2	Prupe.4G018000, Prupe.4G217500
GO:0001678	BP	cellular glucose homeostasis	0.431572	0.849999	0.840321	1	Prupe.6G212100
GO:0030125	CC	clathrin vesicle coat	0.429757	0.849999	0.844534	2	Prupe.2G235100, Prupe.3G155800
GO:0043015	MF	gamma-tubulin binding	0.431367	0.849999	0.840796	1	Prupe.1G390100
GO:0004340	MF	glucokinase activity	0.431572	0.849999	0.840321	1	Prupe.6G212100
GO:0004396	MF	hexokinase activity	0.431572	0.849999	0.840321	1	Prupe.6G212100
GO:0005536	MF	glucose binding	0.431572	0.849999	0.840321	1	Prupe.6G212100
GO:0019158	MF	mannokinase activity	0.431572	0.849999	0.840321	1	Prupe.6G212100
GO:0070008	MF	serine-type exopeptidase activity	0.432383	0.850517	0.838444	1	Prupe.1G357500
GO:0045332	BP	phospholipid translocation	0.433251	0.851147	0.836437	1	Prupe.3G046100
GO:0003824	MF	catalytic activity	0.434386	0.85122	0.833823	77	Prupe.1G011700, Prupe.1G168200, Prupe.1G248200, Prupe.1G309900, Prupe.1G339900, Prupe.1G416900, Prupe.1G417000, Prupe.1G435600, Prupe.1G465800, Prupe.1G480500, Prupe.1G509100, Prupe.1G512500, Prupe.1G536700, Prupe.1G538400, Prupe.1G539400, Prupe.1G548300, Prupe.1G548700, Prupe.1G548900, Prupe.1G587500, Prupe.2G021000, Prupe.2G098600, Prupe.2G098700, Prupe.2G176900, Prupe.2G184900, Prupe.2G288200,…
GO:0004623	MF	phospholipase A2 activity	0.434054	0.85122	0.834586	1	Prupe.1G066500
GO:0030639	BP	polyketide biosynthetic process	0.435341	0.851244	0.831627	2	Prupe.4G252100, Prupe.4G253000
GO:0005575	CC	cellular_component	0.435815	0.851244	0.830538	1	Prupe.3G144100
GO:0005215	MF	transporter activity	0.436043	0.851244	0.830014	3	Prupe.1G525800, Prupe.4G179000, Prupe.5G048000
GO:0031348	BP	negative regulation of defense response	0.437142	0.852318	0.827497	1	Prupe.4G276500
GO:0015729	BP	oxaloacetate transport	0.439525	0.852679	0.82206	1	Prupe.8G067800
GO:1902356	BP	oxaloacetate(2-) transmembrane transport	0.439525	0.852679	0.82206	1	Prupe.8G067800
GO:0042720	CC	mitochondrial inner membrane peptidase complex	0.438262	0.852679	0.824939	1	Prupe.7G010300
GO:0015131	MF	oxaloacetate transmembrane transporter activity	0.439525	0.852679	0.82206	1	Prupe.8G067800
GO:0004794	MF	L-threonine ammonia-lyase activity	0.440208	0.852937	0.820508	1	Prupe.6G116600
GO:0034204	BP	lipid translocation	0.441088	0.853178	0.818512	1	Prupe.3G046100
GO:0003885	MF	D-arabinono-1,4-lactone oxidase activity	0.441432	0.853178	0.817732	1	Prupe.1G450800
GO:0033180	CC	proton-transporting V-type ATPase, V1 domain	0.442074	0.853357	0.816278	1	Prupe.6G005500
GO:0016540	BP	protein autoprocessing	0.443772	0.854509	0.812444	1	Prupe.1G430400
GO:0004000	MF	adenosine deaminase activity	0.443472	0.854509	0.813121	1	Prupe.2G164500
GO:0010047	BP	fruit dehiscence	0.447617	0.858831	0.803818	1	Prupe.5G131900
GO:0009263	BP	deoxyribonucleotide biosynthetic process	0.447677	0.858831	0.803684	1	Prupe.3G306600
GO:0003725	MF	double-stranded RNA binding	0.447513	0.858831	0.80405	2	Prupe.2G164500, Prupe.8G202000
GO:0019829	MF	ATPase-coupled cation transmembrane transporter activity	0.449617	0.861487	0.79936	3	Prupe.1G023400, Prupe.1G078700, Prupe.2G026200
GO:0009809	BP	lignin biosynthetic process	0.451624	0.861701	0.794906	5	Prupe.6G205400, Prupe.6G205900, Prupe.6G207300, Prupe.6G207900, Prupe.6G228800
GO:1902183	BP	regulation of shoot apical meristem development	0.451526	0.861701	0.795122	1	Prupe.7G245200
GO:0005654	CC	nucleoplasm	0.451949	0.861701	0.794186	6	Prupe.3G140300, Prupe.6G014700, Prupe.7G135000, Prupe.8G015200, Prupe.8G015700, Prupe.8G122300
GO:0004322	MF	ferroxidase activity	0.450588	0.861701	0.797201	1	Prupe.6G050900
GO:0071897	BP	DNA biosynthetic process	0.452546	0.861781	0.792866	2	Prupe.1G328900, Prupe.6G025200
GO:0035098	CC	ESC/E(Z) complex	0.453347	0.862249	0.791097	1	Prupe.3G034000
GO:0051085	BP	chaperone cofactor-dependent protein refolding	0.45519	0.864464	0.78704	8	Prupe.1G493700, Prupe.2G234200, Prupe.2G234300, Prupe.2G234400, Prupe.7G106500, Prupe.7G106700, Prupe.7G108100, Prupe.7G108500
GO:0044209	BP	AMP salvage	0.456183	0.864464	0.784861	1	Prupe.1G482300
GO:0004805	MF	trehalose-phosphatase activity	0.455736	0.864464	0.785842	1	Prupe.2G308300
GO:0045892	BP	negative regulation of transcription, DNA-templated	0.458991	0.8671	0.778724	9	Prupe.3G098100, Prupe.3G276200, Prupe.5G059900, Prupe.6G167600, Prupe.6G290900, Prupe.7G098500, Prupe.7G133600, Prupe.8G049400, Prupe.8G197500
GO:0030970	BP	retrograde protein transport, ER to cytosol	0.463193	0.8671	0.769611	1	Prupe.4G237600
GO:0034765	BP	regulation of ion transmembrane transport	0.465286	0.8671	0.765102	1	Prupe.1G472600
GO:0006253	BP	dCTP catabolic process	0.465854	0.8671	0.763883	1	Prupe.8G191900
GO:0042262	BP	DNA protection	0.465854	0.8671	0.763883	1	Prupe.8G191900
GO:0035821	BP	modulation of process of other organism	0.466092	0.8671	0.763373	1	Prupe.1G294500
GO:0046521	BP	sphingoid catabolic process	0.466117	0.8671	0.763319	1	Prupe.4G149500
GO:0007076	BP	mitotic chromosome condensation	0.467353	0.8671	0.760671	1	Prupe.3G017700
GO:0106004	BP	tRNA (guanine-N7)-methylation	0.468189	0.8671	0.758883	1	Prupe.6G232800
GO:0008278	CC	cohesin complex	0.459775	0.8671	0.777019	1	Prupe.2G007300
GO:0030915	CC	Smc5-Smc6 complex	0.467459	0.8671	0.760444	1	Prupe.7G076100
GO:0005544	MF	calcium-dependent phospholipid binding	0.466794	0.8671	0.761868	2	Prupe.1G515200, Prupe.6G333400
GO:0045703	MF	ketoreductase activity	0.461671	0.8671	0.772903	1	Prupe.1G239200
GO:0048027	MF	mRNA 5'-UTR binding	0.461724	0.8671	0.772789	1	Prupe.6G133500
GO:0004124	MF	cysteine synthase activity	0.462969	0.8671	0.770095	1	Prupe.6G338400
GO:0047840	MF	dCTP diphosphatase activity	0.465854	0.8671	0.763883	1	Prupe.8G191900
GO:0030598	MF	rRNA N-glycosylase activity	0.466092	0.8671	0.763373	1	Prupe.1G294500
GO:0090729	MF	toxin activity	0.466092	0.8671	0.763373	1	Prupe.1G294500
GO:0008176	MF	tRNA (guanine-N7-)-methyltransferase activity	0.468189	0.8671	0.758883	1	Prupe.6G232800
GO:0015790	BP	UDP-xylose transmembrane transport	0.471084	0.870384	0.752719	1	Prupe.6G103500
GO:0005464	MF	UDP-xylose transmembrane transporter activity	0.471084	0.870384	0.752719	1	Prupe.6G103500
GO:0008417	MF	fucosyltransferase activity	0.471717	0.870518	0.751375	1	Prupe.1G278500
GO:0006012	BP	galactose metabolic process	0.477968	0.881004	0.738212	2	Prupe.3G005100, Prupe.6G309400
GO:0009624	BP	response to nematode	0.479946	0.881547	0.734082	1	Prupe.8G180300
GO:0004506	MF	squalene monooxygenase activity	0.479481	0.881547	0.73505	1	Prupe.6G216100
GO:0003841	MF	1-acylglycerol-3-phosphate O-acyltransferase activity	0.479966	0.881547	0.734041	1	Prupe.1G383800
GO:0016125	BP	sterol metabolic process	0.481094	0.882574	0.731693	7	Prupe.2G108600, Prupe.4G079400, Prupe.4G103000, Prupe.6G041300, Prupe.7G158700, Prupe.8G026100, Prupe.8G110100
GO:0008266	MF	poly(U) RNA binding	0.481663	0.882575	0.73051	1	Prupe.3G056300
GO:0009742	BP	brassinosteroid mediated signaling pathway	0.482822	0.882625	0.728108	3	Prupe.5G041700, Prupe.6G065400, Prupe.7G264200
GO:0019722	BP	calcium-mediated signaling	0.486809	0.882625	0.719884	3	Prupe.1G384400, Prupe.6G321200, Prupe.7G132200
GO:0030162	BP	regulation of proteolysis	0.486164	0.882625	0.721209	2	Prupe.1G488100, Prupe.1G488300
GO:0007143	BP	female meiotic nuclear division	0.483344	0.882625	0.727027	1	Prupe.6G241500
GO:0010162	BP	seed dormancy process	0.485634	0.882625	0.722299	1	Prupe.4G140900
GO:2000024	BP	regulation of leaf development	0.486739	0.882625	0.720026	1	Prupe.7G245200
GO:0003714	MF	transcription corepressor activity	0.486724	0.882625	0.720059	3	Prupe.3G276200, Prupe.5G059900, Prupe.8G049400
GO:0008143	MF	poly(A) binding	0.48366	0.882625	0.726374	1	Prupe.3G056300
GO:0140312	MF	cargo adaptor activity	0.485065	0.882625	0.723473	1	Prupe.2G055800
GO:0016308	MF	1-phosphatidylinositol-4-phosphate 5-kinase activity	0.488016	0.883781	0.717407	1	Prupe.2G037500
GO:0006282	BP	regulation of DNA repair	0.488821	0.884209	0.715758	1	Prupe.6G082900
GO:0019985	BP	translesion synthesis	0.491318	0.884285	0.710664	2	Prupe.1G328900, Prupe.6G025200
GO:0000302	BP	response to reactive oxygen species	0.492598	0.884285	0.708062	2	Prupe.6G242200, Prupe.7G171100
GO:0015743	BP	malate transport	0.494463	0.884285	0.704284	2	Prupe.2G192500, Prupe.7G094400
GO:0071423	BP	malate transmembrane transport	0.491133	0.884285	0.711041	1	Prupe.8G067800
GO:0010167	BP	response to nitrate	0.49262	0.884285	0.708016	1	Prupe.5G073600
GO:0120029	BP	proton export across plasma membrane	0.494368	0.884285	0.704475	1	Prupe.2G128800
GO:0045739	BP	positive regulation of DNA repair	0.494876	0.884285	0.703448	1	Prupe.6G150100
GO:0010181	MF	FMN binding	0.495131	0.884285	0.702932	5	Prupe.1G465800, Prupe.1G548300, Prupe.1G548700, Prupe.1G548900, Prupe.3G037200
GO:0019901	MF	protein kinase binding	0.490541	0.884285	0.712247	4	Prupe.2G136400, Prupe.2G271100, Prupe.6G140600, Prupe.7G226500
GO:0008381	MF	mechanosensitive ion channel activity	0.489659	0.884285	0.714046	1	Prupe.8G170400
GO:0010277	MF	chlorophyllide a oxygenase [overall] activity	0.494813	0.884285	0.703575	1	Prupe.1G397200
GO:0005200	MF	structural constituent of cytoskeleton	0.49618	0.885139	0.700817	3	Prupe.3G269300, Prupe.5G099500, Prupe.6G212700
GO:0006567	BP	threonine catabolic process	0.498587	0.888412	0.695977	1	Prupe.6G116600
GO:0045489	BP	pectin biosynthetic process	0.499167	0.888426	0.694815	2	Prupe.4G201700, Prupe.5G001800
GO:0005664	CC	nuclear origin of replication recognition complex	0.500276	0.888428	0.692596	1	Prupe.1G438300
GO:0070531	CC	BRCA1-A complex	0.500313	0.888428	0.692521	1	Prupe.6G150100
GO:0043047	MF	single-stranded telomeric DNA binding	0.501062	0.88874	0.691026	1	Prupe.5G205700
GO:0007186	BP	G protein-coupled receptor signaling pathway	0.504414	0.892352	0.684358	2	Prupe.1G399800, Prupe.1G400600
GO:0006896	BP	Golgi to vacuole transport	0.504489	0.892352	0.684209	2	Prupe.4G119200, Prupe.8G015800
GO:0010158	BP	abaxial cell fate specification	0.505398	0.892352	0.68241	1	Prupe.7G245200
GO:0005460	MF	UDP-glucose transmembrane transporter activity	0.505157	0.892352	0.682886	1	Prupe.6G245600
GO:0007219	BP	Notch signaling pathway	0.506324	0.892519	0.680579	1	Prupe.6G167600
GO:0016810	MF	hydrolase activity, acting on carbon-nitrogen (but not peptide) bonds	0.506643	0.892519	0.679949	1	Prupe.4G264100
GO:0006629	BP	lipid metabolic process	0.508335	0.894485	0.676615	33	Prupe.1G233400, Prupe.1G361900, Prupe.1G362100, Prupe.1G434100, Prupe.1G439500, Prupe.1G439700, Prupe.1G439800, Prupe.1G440100, Prupe.2G005300, Prupe.2G055700, Prupe.2G066300, Prupe.2G251800, Prupe.3G029900, Prupe.3G035800, Prupe.3G074600, Prupe.4G059100, Prupe.4G086500, Prupe.4G104000, Prupe.4G276500, Prupe.5G062500, Prupe.6G055900, Prupe.6G126600, Prupe.6G126800, Prupe.6G126900, Prupe.6G288500,…
GO:0006880	BP	intracellular sequestering of iron ion	0.511614	0.895799	0.670185	2	Prupe.6G050900, Prupe.8G027700
GO:0140021	BP	mitochondrial ADP transmembrane transport	0.512545	0.895799	0.668367	1	Prupe.4G244400
GO:1990544	BP	mitochondrial ATP transmembrane transport	0.512545	0.895799	0.668367	1	Prupe.4G244400
GO:0005662	CC	DNA replication factor A complex	0.509952	0.895799	0.673438	1	Prupe.5G205700
GO:0030130	CC	clathrin coat of trans-Golgi network vesicle	0.51102	0.895799	0.671347	1	Prupe.3G155800
GO:0030132	CC	clathrin coat of coated pit	0.51102	0.895799	0.671347	1	Prupe.3G155800
GO:0006979	BP	response to oxidative stress	0.527352	0.896917	0.639888	17	Prupe.1G308600, Prupe.2G260600, Prupe.3G115300, Prupe.3G276500, Prupe.4G021100, Prupe.4G056100, Prupe.4G276800, Prupe.6G013200, Prupe.6G013500, Prupe.6G044300, Prupe.6G192000, Prupe.6G223400, Prupe.6G242200, Prupe.7G064000, Prupe.7G161900, Prupe.7G171100, Prupe.8G038900
GO:0098869	BP	cellular oxidant detoxification	0.538166	0.896917	0.619589	17	Prupe.1G515200, Prupe.2G260600, Prupe.3G115300, Prupe.4G021100, Prupe.4G056100, Prupe.4G276800, Prupe.6G013200, Prupe.6G013500, Prupe.6G018300, Prupe.6G044300, Prupe.6G112800, Prupe.6G192000, Prupe.6G223400, Prupe.6G242200, Prupe.7G161900, Prupe.7G171100, Prupe.8G038900
GO:0006612	BP	protein targeting to membrane	0.531978	0.896917	0.631153	3	Prupe.1G212000, Prupe.1G280400, Prupe.3G002400
GO:0061025	BP	membrane fusion	0.539358	0.896917	0.617377	3	Prupe.2G040000, Prupe.2G173700, Prupe.7G015100
GO:0043622	BP	cortical microtubule organization	0.536988	0.896917	0.62178	2	Prupe.6G296400, Prupe.6G365700
GO:0009251	BP	glucan catabolic process	0.542204	0.896917	0.612113	2	Prupe.2G092300, Prupe.2G092900
GO:0030261	BP	chromosome condensation	0.543236	0.896917	0.610212	2	Prupe.1G330600, Prupe.3G017700
GO:0007004	BP	telomere maintenance via telomerase	0.514649	0.896917	0.664269	1	Prupe.5G205700
GO:0000290	BP	deadenylation-dependent decapping of nuclear-transcribed mRNA	0.516148	0.896917	0.661362	1	Prupe.6G135600
GO:0009143	BP	nucleoside triphosphate catabolic process	0.516505	0.896917	0.660671	1	Prupe.8G191900
GO:0032786	BP	positive regulation of DNA-templated transcription, elongation	0.522622	0.896917	0.648897	1	Prupe.6G162800
GO:0009958	BP	positive gravitropism	0.523083	0.896917	0.648015	1	Prupe.3G038300
GO:0001666	BP	response to hypoxia	0.524907	0.896917	0.644534	1	Prupe.4G276500
GO:0017157	BP	regulation of exocytosis	0.525281	0.896917	0.643822	1	Prupe.6G360900
GO:0019563	BP	glycerol catabolic process	0.531074	0.896917	0.632854	1	Prupe.6G076300
GO:0005980	BP	glycogen catabolic process	0.531977	0.896917	0.631154	1	Prupe.1G283400
GO:0006166	BP	purine ribonucleoside salvage	0.532263	0.896917	0.630618	1	Prupe.1G482300
GO:0050826	BP	response to freezing	0.532386	0.896917	0.630387	1	Prupe.2G251900
GO:0009617	BP	response to bacterium	0.532873	0.896917	0.629472	1	Prupe.4G276500
GO:0015786	BP	UDP-glucose transmembrane transport	0.536597	0.896917	0.622509	1	Prupe.6G245600
GO:0030497	BP	fatty acid elongation	0.538131	0.896917	0.619653	1	Prupe.1G233400
GO:0051302	BP	regulation of cell division	0.539368	0.896917	0.617358	1	Prupe.2G264300
GO:0045737	BP	positive regulation of cyclin-dependent protein serine/threonine kinase activity	0.541199	0.896917	0.613968	1	Prupe.6G162800
GO:0080092	BP	regulation of pollen tube growth	0.541258	0.896917	0.613859	1	Prupe.5G015000
GO:1902476	BP	chloride transmembrane transport	0.541615	0.896917	0.6132	1	Prupe.3G053200
GO:0042989	BP	sequestering of actin monomers	0.543006	0.896917	0.610635	1	Prupe.1G504400
GO:0019953	BP	sexual reproduction	0.543224	0.896917	0.610234	1	Prupe.3G155600
GO:0005887	CC	integral component of plasma membrane	0.539119	0.896917	0.617819	11	Prupe.1G023400, Prupe.1G491400, Prupe.1G558300, Prupe.2G026200, Prupe.2G279100, Prupe.4G283900, Prupe.6G026100, Prupe.6G026200, Prupe.6G026300, Prupe.6G245600, Prupe.6G281900
GO:0000922	CC	spindle pole	0.515284	0.896917	0.663038	1	Prupe.1G390100
GO:0000276	CC	mitochondrial proton-transporting ATP synthase complex, coupling factor F(o)	0.541226	0.896917	0.613919	1	Prupe.3G052200
GO:0045263	CC	proton-transporting ATP synthase complex, coupling factor F(o)	0.541589	0.896917	0.613248	1	Prupe.3G052200
GO:0008233	MF	peptidase activity	0.518464	0.896917	0.656885	34	Prupe.1G348100, Prupe.1G348300, Prupe.1G397700, Prupe.1G441000, Prupe.1G457200, Prupe.1G457300, Prupe.1G491400, Prupe.1G493500, Prupe.1G507800, Prupe.1G511100, Prupe.2G035100, Prupe.2G151900, Prupe.2G152000, Prupe.2G242000, Prupe.2G242100, Prupe.2G242400, Prupe.2G285500, Prupe.3G007600, Prupe.3G032200, Prupe.3G044500, Prupe.3G120900, Prupe.3G177100, Prupe.5G037200, Prupe.5G085700, Prupe.5G133500,…
GO:0004601	MF	peroxidase activity	0.522351	0.896917	0.649416	14	Prupe.2G260600, Prupe.3G115300, Prupe.4G021100, Prupe.4G056100, Prupe.4G276800, Prupe.6G013200, Prupe.6G013500, Prupe.6G044300, Prupe.6G192000, Prupe.6G223400, Prupe.6G242200, Prupe.7G161900, Prupe.7G171100, Prupe.8G038900
GO:0004386	MF	helicase activity	0.542835	0.896917	0.61095	12	Prupe.1G134300, Prupe.1G201900, Prupe.1G202500, Prupe.1G368500, Prupe.1G422500, Prupe.2G078200, Prupe.2G078300, Prupe.3G045600, Prupe.8G031700, Prupe.8G103900, Prupe.8G104500, Prupe.8G202000
GO:0043621	MF	protein self-association	0.539521	0.896917	0.617074	5	Prupe.1G407100, Prupe.2G243800, Prupe.6G066100, Prupe.6G066300, Prupe.6G066400
GO:0016627	MF	oxidoreductase activity, acting on the CH-CH group of donors	0.515269	0.896917	0.663065	3	Prupe.2G066300, Prupe.6G181800, Prupe.7G067100
GO:0016765	MF	transferase activity, transferring alkyl or aryl (other than methyl) groups	0.52925	0.896917	0.636294	3	Prupe.1G346500, Prupe.4G167100, Prupe.6G058100
GO:0015140	MF	malate transmembrane transporter activity	0.519482	0.896917	0.654923	1	Prupe.8G067800
GO:0016628	MF	oxidoreductase activity, acting on the CH-CH group of donors, NAD or NADP as acceptor	0.519677	0.896917	0.654547	1	Prupe.1G345300
GO:0017022	MF	myosin binding	0.525244	0.896917	0.643893	1	Prupe.8G128800
GO:0016759	MF	cellulose synthase activity	0.52624	0.896917	0.641999	1	Prupe.8G216900
GO:0003730	MF	mRNA 3'-UTR binding	0.52988	0.896917	0.635105	1	Prupe.3G056300
GO:0004645	MF	1,4-alpha-oligoglucan phosphorylase activity	0.531977	0.896917	0.631154	1	Prupe.1G283400
GO:0008184	MF	glycogen phosphorylase activity	0.531977	0.896917	0.631154	1	Prupe.1G283400
GO:0102250	MF	linear malto-oligosaccharide phosphorylase activity	0.531977	0.896917	0.631154	1	Prupe.1G283400
GO:0102499	MF	SHG alpha-glucan phosphorylase activity	0.531977	0.896917	0.631154	1	Prupe.1G283400
GO:0005249	MF	voltage-gated potassium channel activity	0.532461	0.896917	0.630245	1	Prupe.1G472600
GO:0008047	MF	enzyme activator activity	0.535117	0.896917	0.62527	1	Prupe.6G135600
GO:0008251	MF	tRNA-specific adenosine deaminase activity	0.537177	0.896917	0.621428	1	Prupe.2G164500
GO:0061575	MF	cyclin-dependent protein serine/threonine kinase activator activity	0.541199	0.896917	0.613968	1	Prupe.6G162800
GO:0016707	MF	gibberellin 3-beta-dioxygenase activity	0.542717	0.896917	0.611168	1	Prupe.1G467600
GO:0003785	MF	actin monomer binding	0.543006	0.896917	0.610635	1	Prupe.1G504400
GO:0006490	BP	oligosaccharide-lipid intermediate biosynthetic process	0.544177	0.897449	0.608481	1	Prupe.2G117600
GO:0010431	BP	seed maturation	0.544714	0.897449	0.607494	1	Prupe.6G196000
GO:0030124	CC	AP-4 adaptor complex	0.545393	0.897614	0.606248	1	Prupe.2G055800
GO:0090501	BP	RNA phosphodiester bond hydrolysis	0.547425	0.900004	0.60253	4	Prupe.3G213200, Prupe.4G219300, Prupe.4G219500, Prupe.8G202000
GO:0070588	BP	calcium ion transmembrane transport	0.550665	0.904166	0.59663	4	Prupe.1G023400, Prupe.2G026200, Prupe.3G125200, Prupe.3G192400
GO:0006898	BP	receptor-mediated endocytosis	0.551122	0.904166	0.595799	1	Prupe.2G055800
GO:0030659	CC	cytoplasmic vesicle membrane	0.551748	0.904237	0.594664	1	Prupe.3G155800
GO:0009082	BP	branched-chain amino acid biosynthetic process	0.552956	0.904308	0.592476	2	Prupe.6G116600, Prupe.8G155300
GO:0009620	BP	response to fungus	0.552763	0.904308	0.592827	1	Prupe.1G211200
GO:0000287	MF	magnesium ion binding	0.55497	0.906645	0.588842	15	Prupe.3G046100, Prupe.4G029900, Prupe.4G030400, Prupe.4G125500, Prupe.4G194300, Prupe.4G197900, Prupe.4G198200, Prupe.4G198500, Prupe.4G198700, Prupe.4G199000, Prupe.4G199200, Prupe.4G199300, Prupe.4G199500, Prupe.4G200100, Prupe.8G191900
GO:0040008	BP	regulation of growth	0.555745	0.906958	0.587445	1	Prupe.3G038300
GO:0016114	BP	terpenoid biosynthetic process	0.558108	0.909856	0.583203	1	Prupe.6G204700
GO:0015996	BP	chlorophyll catabolic process	0.560037	0.911492	0.579753	1	Prupe.8G235600
GO:0005856	CC	cytoskeleton	0.560873	0.911492	0.578261	10	Prupe.1G390100, Prupe.1G504400, Prupe.3G140300, Prupe.3G257100, Prupe.4G183100, Prupe.5G099500, Prupe.6G229300, Prupe.7G077300, Prupe.7G226500, Prupe.7G240100
GO:0031225	CC	anchored component of membrane	0.560402	0.911492	0.579101	2	Prupe.3G250400, Prupe.5G207900
GO:0005802	CC	trans-Golgi network	0.5615	0.911557	0.577143	14	Prupe.1G033700, Prupe.1G033900, Prupe.1G278700, Prupe.2G290800, Prupe.3G214200, Prupe.3G264100, Prupe.4G119200, Prupe.5G027700, Prupe.6G024900, Prupe.6G025000, Prupe.6G025100, Prupe.7G116800, Prupe.8G015800, Prupe.8G216900
GO:0005782	CC	peroxisomal matrix	0.562708	0.912562	0.574995	1	Prupe.4G189300
GO:0050832	BP	defense response to fungus	0.564186	0.914005	0.572371	10	Prupe.1G376000, Prupe.1G407500, Prupe.3G098100, Prupe.5G132000, Prupe.6G286000, Prupe.6G343900, Prupe.6G348200, Prupe.7G095800, Prupe.8G174900, Prupe.8G235600
GO:0003954	MF	NADH dehydrogenase activity	0.565456	0.915107	0.570122	1	Prupe.8G025300
GO:0006139	BP	nucleobase-containing compound metabolic process	0.577741	0.915887	0.54863	3	Prupe.1G164900, Prupe.4G179100, Prupe.6G315500
GO:0016925	BP	protein sumoylation	0.567588	0.915887	0.56636	2	Prupe.4G222000, Prupe.4G277000
GO:0055088	BP	lipid homeostasis	0.573459	0.915887	0.556069	2	Prupe.6G181800, Prupe.7G067100
GO:0006270	BP	DNA replication initiation	0.577409	0.915887	0.549204	2	Prupe.6G241500, Prupe.8G031700
GO:0010305	BP	leaf vascular tissue pattern formation	0.568534	0.915887	0.564695	1	Prupe.8G235800
GO:0006826	BP	iron ion transport	0.568834	0.915887	0.564167	1	Prupe.6G050900
GO:0045165	BP	cell fate commitment	0.570208	0.915887	0.561754	1	Prupe.7G245200
GO:0042023	BP	DNA endoreduplication	0.570488	0.915887	0.561262	1	Prupe.2G315400
GO:0006627	BP	protein processing involved in protein targeting to mitochondrion	0.575157	0.915887	0.553113	1	Prupe.7G010300
GO:0006565	BP	L-serine catabolic process	0.576284	0.915887	0.551154	1	Prupe.1G539400
GO:0019264	BP	glycine biosynthetic process from serine	0.576284	0.915887	0.551154	1	Prupe.1G539400
GO:0046655	BP	folic acid metabolic process	0.576284	0.915887	0.551154	1	Prupe.1G539400
GO:0015976	BP	carbon utilization	0.577728	0.915887	0.548652	1	Prupe.6G080400
GO:0033588	CC	Elongator holoenzyme complex	0.573706	0.915887	0.555638	1	Prupe.6G206700
GO:0000977	MF	RNA polymerase II transcription regulatory region sequence-specific DNA binding	0.574507	0.915887	0.554242	8	Prupe.1G371300, Prupe.1G538700, Prupe.3G307800, Prupe.5G175200, Prupe.5G208400, Prupe.7G039800, Prupe.7G039900, Prupe.7G040100
GO:0050661	MF	NADP binding	0.573292	0.915887	0.55636	6	Prupe.1G468500, Prupe.5G199900, Prupe.7G187000, Prupe.7G193500, Prupe.7G231200, Prupe.8G177000
GO:0008408	MF	3'-5' exonuclease activity	0.574266	0.915887	0.554663	3	Prupe.1G164900, Prupe.4G179100, Prupe.6G315500
GO:0004372	MF	glycine hydroxymethyltransferase activity	0.576284	0.915887	0.551154	1	Prupe.1G539400
GO:0070905	MF	serine binding	0.576284	0.915887	0.551154	1	Prupe.1G539400
GO:0046923	MF	ER retention sequence binding	0.576611	0.915887	0.550587	1	Prupe.2G324900
GO:0048856	BP	anatomical structure development	0.578543	0.916224	0.547242	1	Prupe.6G023800
GO:0009638	BP	phototropism	0.580544	0.918455	0.543789	1	Prupe.5G191900
GO:0009744	BP	response to sucrose	0.582477	0.919382	0.540466	2	Prupe.4G124800, Prupe.8G131900
GO:0007020	BP	microtubule nucleation	0.581766	0.919382	0.541686	1	Prupe.1G390100
GO:0051156	BP	glucose 6-phosphate metabolic process	0.585465	0.919382	0.535349	1	Prupe.6G212100
GO:0009944	BP	polarity specification of adaxial/abaxial axis	0.585599	0.919382	0.535121	1	Prupe.7G245200
GO:0005854	CC	nascent polypeptide-associated complex	0.584422	0.919382	0.537132	1	Prupe.8G023400
GO:0051015	MF	actin filament binding	0.584532	0.919382	0.536944	5	Prupe.1G019400, Prupe.1G422200, Prupe.2G165300, Prupe.6G181100, Prupe.8G190200
GO:0140326	MF	ATPase-coupled intramembrane lipid transporter activity	0.585869	0.919382	0.534659	1	Prupe.3G046100
GO:0004012	#N/A	#N/A	0.585869	0.919382	0.534659	1	Prupe.3G046100
GO:0042819	BP	vitamin B6 biosynthetic process	0.587596	0.920771	0.531716	1	Prupe.6G216600
GO:0015267	MF	channel activity	0.587941	0.920771	0.531129	4	Prupe.3G009400, Prupe.3G063500, Prupe.7G125900, Prupe.8G159000
GO:0090503	BP	RNA phosphodiester bond hydrolysis, exonucleolytic	0.589528	0.921305	0.528433	4	Prupe.6G123500, Prupe.6G139300, Prupe.6G139800, Prupe.6G141200
GO:0031936	BP	negative regulation of chromatin silencing	0.590062	0.921305	0.527527	2	Prupe.1G330600, Prupe.3G034000
GO:0019905	MF	syntaxin binding	0.589726	0.921305	0.528098	1	Prupe.2G144900
GO:0030014	CC	CCR4-NOT complex	0.591323	0.922344	0.525394	3	Prupe.6G123500, Prupe.6G139300, Prupe.6G139800
GO:0003887	MF	DNA-directed DNA polymerase activity	0.592545	0.923323	0.523329	2	Prupe.1G328900, Prupe.6G025200
GO:0008202	BP	steroid metabolic process	0.596754	0.926207	0.516251	1	Prupe.1G345300
GO:0046488	BP	phosphatidylinositol metabolic process	0.596783	0.926207	0.516202	1	Prupe.2G037500
GO:0048500	CC	signal recognition particle	0.595815	0.926207	0.517824	1	Prupe.8G050200
GO:0016307	MF	phosphatidylinositol phosphate kinase activity	0.596783	0.926207	0.516202	1	Prupe.2G037500
GO:0048235	BP	pollen sperm cell differentiation	0.601232	0.931521	0.508775	1	Prupe.6G345600
GO:0045087	BP	innate immune response	0.60372	0.931521	0.504644	1	Prupe.8G048500
GO:0009969	BP	xyloglucan biosynthetic process	0.603758	0.931521	0.504582	1	Prupe.1G278500
GO:0015630	CC	microtubule cytoskeleton	0.604099	0.931521	0.504017	2	Prupe.2G040000, Prupe.7G015100
GO:0031625	MF	ubiquitin protein ligase binding	0.602619	0.931521	0.506471	8	Prupe.1G256600, Prupe.1G488100, Prupe.1G488300, Prupe.2G185300, Prupe.4G142400, Prupe.4G194900, Prupe.4G195400, Prupe.4G195600
GO:0005543	MF	phospholipid binding	0.601875	0.931521	0.507706	3	Prupe.1G066500, Prupe.1G524700, Prupe.2G235100
GO:0052861	MF	glucan endo-1,3-beta-glucanase activity, C-3 substituted reducing group	0.605009	0.931521	0.502512	1	Prupe.8G194600
GO:0052862	MF	glucan endo-1,4-beta-glucanase activity, C-3 substituted reducing group	0.605009	0.931521	0.502512	1	Prupe.8G194600
GO:0071669	BP	plant-type cell wall organization or biogenesis	0.60688	0.931692	0.499424	1	Prupe.3G249900
GO:0009228	BP	thiamine biosynthetic process	0.60796	0.931692	0.497646	1	Prupe.6G204700
GO:0034553	BP	mitochondrial respiratory chain complex II assembly	0.609894	0.931692	0.49447	1	Prupe.8G008800
GO:0009415	BP	response to water	0.609922	0.931692	0.494424	1	Prupe.7G161200
GO:0016836	MF	hydro-lyase activity	0.608028	0.931692	0.497535	2	Prupe.4G263400, Prupe.6G104900
GO:0005388	MF	calcium transmembrane transporter activity, phosphorylative mechanism	0.608465	0.931692	0.496815	2	Prupe.1G023400, Prupe.2G026200
GO:0004784	MF	superoxide dismutase activity	0.609	0.931692	0.495936	1	Prupe.6G112800
GO:0008121	MF	ubiquinol-cytochrome-c reductase activity	0.609796	0.931692	0.49463	1	Prupe.8G028000
GO:0009965	BP	leaf morphogenesis	0.611166	0.932674	0.492387	1	Prupe.8G174800
GO:0030833	BP	regulation of actin filament polymerization	0.614635	0.937047	0.486726	1	Prupe.6G360900
GO:0051026	BP	chiasma assembly	0.615614	0.937532	0.485135	1	Prupe.4G156500
GO:0047631	MF	ADP-ribose diphosphatase activity	0.616162	0.937532	0.484246	1	Prupe.3G197000
GO:0009736	BP	cytokinin-activated signaling pathway	0.617538	0.938706	0.482015	3	Prupe.1G260700, Prupe.3G143800, Prupe.6G123100
GO:0005471	MF	ATP:ADP antiporter activity	0.618645	0.939469	0.480224	1	Prupe.4G244400
GO:0010020	BP	chloroplast fission	0.621414	0.942258	0.475758	2	Prupe.2G183300, Prupe.3G261900
GO:0015074	BP	DNA integration	0.622303	0.942258	0.474328	1	Prupe.5G195800
GO:0052381	MF	tRNA dimethylallyltransferase activity	0.621832	0.942258	0.475085	1	Prupe.1G312400
GO:0005773	CC	vacuole	0.628257	0.950345	0.464807	16	Prupe.1G192200, Prupe.1G348100, Prupe.1G348300, Prupe.1G372800, Prupe.1G441000, Prupe.2G023900, Prupe.2G277900, Prupe.3G192400, Prupe.3G311400, Prupe.4G086300, Prupe.4G279500, Prupe.5G143500, Prupe.7G163100, Prupe.7G179100, Prupe.8G089500, Prupe.8G235600
GO:0003779	MF	actin binding	0.631208	0.95388	0.46012	5	Prupe.1G019400, Prupe.1G504400, Prupe.2G165300, Prupe.5G242300, Prupe.6G201900
GO:0050896	BP	response to stimulus	0.63266	0.955144	0.457822	1	Prupe.5G092500
GO:0016602	CC	CCAAT-binding factor complex	0.633716	0.955809	0.456154	2	Prupe.3G197300, Prupe.8G256000
GO:0009686	BP	gibberellin biosynthetic process	0.635385	0.956467	0.453525	2	Prupe.1G388500, Prupe.1G467600
GO:0010089	BP	xylem development	0.63525	0.956467	0.453736	1	Prupe.3G218700
GO:0006833	BP	water transport	0.637132	0.957727	0.450778	2	Prupe.3G063500, Prupe.7G125900
GO:0016790	MF	thiolester hydrolase activity	0.637456	0.957727	0.45027	1	Prupe.3G074600
GO:0008375	MF	acetylglucosaminyltransferase activity	0.639004	0.958198	0.447844	5	Prupe.1G314700, Prupe.4G260000, Prupe.5G223500, Prupe.6G089900, Prupe.7G016000
GO:0016297	MF	acyl-[acyl-carrier-protein] hydrolase activity	0.638557	0.958198	0.448544	1	Prupe.3G074600
GO:0071007	CC	U2-type catalytic step 2 spliceosome	0.640177	0.95903	0.44601	1	Prupe.6G139700
GO:0048278	BP	vesicle docking	0.645077	0.96045	0.438386	3	Prupe.2G173700, Prupe.7G000700, Prupe.7G093400
GO:0009561	BP	megagametogenesis	0.641936	0.96045	0.443266	1	Prupe.2G007300
GO:0009850	BP	auxin metabolic process	0.643914	0.96045	0.440191	1	Prupe.7G100000
GO:0019318	BP	hexose metabolic process	0.644336	0.96045	0.439535	1	Prupe.6G212100
GO:0034098	CC	VCP-NPL4-UFD1 AAA ATPase complex	0.645457	0.96045	0.437797	1	Prupe.4G237600
GO:0010179	MF	IAA-Ala conjugate hydrolase activity	0.643914	0.96045	0.440191	1	Prupe.7G100000
GO:0047429	MF	nucleoside-triphosphate diphosphatase activity	0.644514	0.96045	0.439259	1	Prupe.8G191900
GO:0006817	BP	phosphate ion transport	0.647214	0.96122	0.435079	2	Prupe.1G278700, Prupe.3G264100
GO:0005085	MF	guanyl-nucleotide exchange factor activity	0.646918	0.96122	0.435536	3	Prupe.2G170400, Prupe.5G015000, Prupe.6G264800
GO:0006816	BP	calcium ion transport	0.651909	0.962667	0.42785	3	Prupe.1G023400, Prupe.2G026200, Prupe.3G192400
GO:0015696	BP	ammonium transport	0.651305	0.962667	0.428777	2	Prupe.4G283900, Prupe.6G281900
GO:0072488	BP	ammonium transmembrane transport	0.651305	0.962667	0.428777	2	Prupe.4G283900, Prupe.6G281900
GO:0008519	MF	ammonium transmembrane transporter activity	0.651305	0.962667	0.428777	2	Prupe.4G283900, Prupe.6G281900
GO:0016857	MF	racemase and epimerase activity, acting on carbohydrates and derivatives	0.650516	0.962667	0.429989	1	Prupe.1G164800
GO:0009881	MF	photoreceptor activity	0.651727	0.962667	0.42813	1	Prupe.5G092500
GO:0042995	CC	cell projection	0.653959	0.962946	0.42471	1	Prupe.7G226500
GO:0035529	MF	NADH pyrophosphatase activity	0.652892	0.962946	0.426344	1	Prupe.3G197000
GO:0051777	MF	ent-kaurenoate oxidase activity	0.653551	0.962946	0.425335	1	Prupe.2G108600
GO:0010039	BP	response to iron ion	0.656584	0.96498	0.420704	1	Prupe.6G112800
GO:0008865	MF	fructokinase activity	0.656195	0.96498	0.421297	1	Prupe.6G212100
GO:0015250	MF	water channel activity	0.657816	0.965876	0.41883	2	Prupe.3G063500, Prupe.7G125900
GO:0006334	BP	nucleosome assembly	0.668448	0.967059	0.402796	4	Prupe.1G169000, Prupe.1G330600, Prupe.2G232200, Prupe.7G028400
GO:0042273	BP	ribosomal large subunit biogenesis	0.668361	0.967059	0.402927	3	Prupe.6G014700, Prupe.8G015200, Prupe.8G015700
GO:0016036	BP	cellular response to phosphate starvation	0.659993	0.967059	0.415526	2	Prupe.1G278700, Prupe.3G264100
GO:0007140	BP	male meiotic nuclear division	0.662035	0.967059	0.412438	1	Prupe.6G241500
GO:0006801	BP	superoxide metabolic process	0.664768	0.967059	0.408317	1	Prupe.6G112800
GO:0010197	BP	polar nucleus fusion	0.665368	0.967059	0.407416	1	Prupe.1G350700
GO:0006278	BP	RNA-dependent DNA biosynthetic process	0.666974	0.967059	0.405005	1	Prupe.5G195800
GO:2000032	BP	regulation of secondary shoot formation	0.667138	0.967059	0.404759	1	Prupe.1G304700
GO:0042823	BP	pyridoxal phosphate biosynthetic process	0.668592	0.967059	0.402582	1	Prupe.6G216600
GO:0005794	CC	Golgi apparatus	0.660129	0.967059	0.41532	59	Prupe.1G066500, Prupe.1G110700, Prupe.1G166300, Prupe.1G212000, Prupe.1G278500, Prupe.1G278700, Prupe.1G280400, Prupe.1G281500, Prupe.1G305600, Prupe.1G457800, Prupe.1G524700, Prupe.1G581600, Prupe.1G582100, Prupe.2G089900, Prupe.2G090000, Prupe.2G101700, Prupe.2G153500, Prupe.2G235100, Prupe.2G251900, Prupe.3G002400, Prupe.3G107900, Prupe.3G108000, Prupe.3G108300, Prupe.3G167200, Prupe.3G168700,…
GO:0000445	CC	THO complex part of transcription export complex	0.666206	0.967059	0.406157	1	Prupe.8G026600
GO:0005663	CC	DNA replication factor C complex	0.668335	0.967059	0.402966	1	Prupe.4G268900
GO:0033897	MF	ribonuclease T2 activity	0.660552	0.967059	0.414679	1	Prupe.1G275400
GO:0052691	MF	UDP-arabinopyranose mutase activity	0.664407	0.967059	0.40886	1	Prupe.3G249900
GO:0003964	MF	RNA-directed DNA polymerase activity	0.666974	0.967059	0.405005	1	Prupe.5G195800
GO:0005319	MF	lipid transporter activity	0.668586	0.967059	0.40259	1	Prupe.5G229600
GO:0006906	BP	vesicle fusion	0.67069	0.967731	0.399448	3	Prupe.2G173700, Prupe.7G000700, Prupe.7G093400
GO:0045492	BP	xylan biosynthetic process	0.67247	0.967731	0.396797	2	Prupe.1G582100, Prupe.4G170300
GO:0046855	BP	inositol phosphate dephosphorylation	0.672555	0.967731	0.396672	1	Prupe.1G384600
GO:0071472	BP	cellular response to salt stress	0.673365	0.967731	0.395468	1	Prupe.6G112800
GO:0070646	BP	protein modification by small protein removal	0.674499	0.967731	0.393785	1	Prupe.8G102300
GO:0009705	CC	plant-type vacuole membrane	0.67178	0.967731	0.397824	5	Prupe.1G249000, Prupe.2G192500, Prupe.3G192400, Prupe.6G107500, Prupe.7G094400
GO:0102336	MF	3-oxo-arachidoyl-CoA synthase activity	0.675292	0.967731	0.39261	3	Prupe.6G086800, Prupe.8G042200, Prupe.8G096100
GO:0102337	MF	3-oxo-cerotoyl-CoA synthase activity	0.675292	0.967731	0.39261	3	Prupe.6G086800, Prupe.8G042200, Prupe.8G096100
GO:0102338	MF	3-oxo-lignoceronyl-CoA synthase activity	0.675292	0.967731	0.39261	3	Prupe.6G086800, Prupe.8G042200, Prupe.8G096100
GO:0102756	MF	very-long-chain 3-ketoacyl-CoA synthase activity	0.675292	0.967731	0.39261	3	Prupe.6G086800, Prupe.8G042200, Prupe.8G096100
GO:0009409	BP	response to cold	0.681154	0.969218	0.383966	5	Prupe.1G413900, Prupe.3G005100, Prupe.6G058100, Prupe.6G062500, Prupe.6G286000
GO:0016132	BP	brassinosteroid biosynthetic process	0.682403	0.969218	0.382136	3	Prupe.2G108600, Prupe.7G158700, Prupe.8G026100
GO:0016024	BP	CDP-diacylglycerol biosynthetic process	0.680874	0.969218	0.384378	1	Prupe.1G383800
GO:0007033	BP	vacuole organization	0.681414	0.969218	0.383585	1	Prupe.5G086700
GO:0030865	BP	cortical cytoskeleton organization	0.681602	0.969218	0.38331	1	Prupe.7G226500
GO:0031380	CC	nuclear RNA-directed RNA polymerase complex	0.680577	0.969218	0.384814	1	Prupe.1G132100
GO:0032050	MF	clathrin heavy chain binding	0.677878	0.969218	0.388788	2	Prupe.1G524700, Prupe.3G155800
GO:0004467	MF	long-chain fatty acid-CoA ligase activity	0.679729	0.969218	0.386062	1	Prupe.8G108400
GO:0033612	MF	receptor serine/threonine kinase binding	0.68205	0.969218	0.382653	1	Prupe.2G283600
GO:0003950	MF	NAD+ ADP-ribosyltransferase activity	0.682574	0.969218	0.381884	1	Prupe.3G262700
GO:0007015	BP	actin filament organization	0.685014	0.970906	0.378316	2	Prupe.6G181100, Prupe.7G226500
GO:0006268	BP	DNA unwinding involved in DNA replication	0.684778	0.970906	0.37866	1	Prupe.5G205700
GO:0033356	BP	UDP-L-arabinose metabolic process	0.686386	0.971366	0.376315	1	Prupe.3G249900
GO:0019773	CC	proteasome core complex, alpha-subunit complex	0.68659	0.971366	0.376017	1	Prupe.3G183900
GO:0010268	BP	brassinosteroid homeostasis	0.692402	0.971789	0.367588	3	Prupe.2G108600, Prupe.7G158700, Prupe.8G026100
GO:0006401	BP	RNA catabolic process	0.688823	0.971789	0.37277	2	Prupe.1G275400, Prupe.3G288900
GO:0006857	BP	oligopeptide transport	0.692525	0.971789	0.367411	2	Prupe.5G073600, Prupe.6G091900
GO:0042538	BP	hyperosmotic salinity response	0.687986	0.971789	0.373987	1	Prupe.6G354100
GO:0000054	BP	ribosomal subunit export from nucleus	0.691717	0.971789	0.368578	1	Prupe.3G018700
GO:0015629	CC	actin cytoskeleton	0.689289	0.971789	0.372095	3	Prupe.1G422200, Prupe.2G165300, Prupe.6G181100
GO:0030687	CC	preribosome, large subunit precursor	0.692318	0.971789	0.36771	3	Prupe.8G011700, Prupe.8G015200, Prupe.8G015700
GO:0004527	MF	exonuclease activity	0.691002	0.971789	0.369613	3	Prupe.6G139300, Prupe.6G139800, Prupe.6G141200
GO:0005375	MF	copper ion transmembrane transporter activity	0.690841	0.971789	0.369846	1	Prupe.6G007600
GO:0045168	BP	cell-cell signaling involved in cell fate commitment	0.693897	0.972705	0.365432	1	Prupe.3G275200
GO:0008553	MF	proton-exporting ATPase activity, phosphorylative mechanism	0.694431	0.972705	0.364662	1	Prupe.2G128800
GO:0006635	BP	fatty acid beta-oxidation	0.697121	0.972801	0.360797	2	Prupe.6G181800, Prupe.7G067100
GO:0031647	BP	regulation of protein stability	0.695487	0.972801	0.363143	1	Prupe.2G052800
GO:0022904	BP	respiratory electron transport chain	0.697012	0.972801	0.360952	1	Prupe.2G072100
GO:0000070	BP	mitotic sister chromatid segregation	0.698261	0.972801	0.359163	1	Prupe.8G049400
GO:0030234	MF	enzyme regulator activity	0.696251	0.972801	0.362045	2	Prupe.1G384400, Prupe.6G135600
GO:0016985	MF	mannan endo-1,4-beta-mannosidase activity	0.697957	0.972801	0.359597	1	Prupe.6G181100
GO:0070919	BP	production of siRNA involved in chromatin silencing by small RNA	0.700018	0.974375	0.356649	1	Prupe.1G132100
GO:0050821	BP	protein stabilization	0.701285	0.975263	0.354841	2	Prupe.4G087300, Prupe.6G053300
GO:0006526	BP	arginine biosynthetic process	0.702659	0.975426	0.352884	1	Prupe.3G094600
GO:0030015	CC	CCR4-NOT core complex	0.702626	0.975426	0.35293	2	Prupe.6G139300, Prupe.6G139800
GO:0010584	BP	pollen exine formation	0.704185	0.976671	0.350714	1	Prupe.2G189800
GO:0009299	BP	mRNA transcription	0.707219	0.979129	0.346415	1	Prupe.3G118100
GO:0000943	CC	retrotransposon nucleocapsid	0.707069	0.979129	0.346627	2	Prupe.1G091500, Prupe.3G026300
GO:0009423	BP	chorismate biosynthetic process	0.708153	0.979548	0.345095	1	Prupe.6G166100
GO:0000956	BP	nuclear-transcribed mRNA catabolic process	0.711736	0.981679	0.340048	1	Prupe.6G141200
GO:0009626	BP	plant-type hypersensitive response	0.711869	0.981679	0.339861	1	Prupe.1G334800
GO:0048280	BP	vesicle fusion with Golgi apparatus	0.712223	0.981679	0.339364	1	Prupe.2G293800
GO:0005750	CC	mitochondrial respiratory chain complex III	0.711768	0.981679	0.340004	1	Prupe.8G028000
GO:0006878	BP	cellular copper ion homeostasis	0.714766	0.983611	0.335801	1	Prupe.6G007600
GO:0009788	BP	negative regulation of abscisic acid-activated signaling pathway	0.714893	0.983611	0.335623	1	Prupe.3G143800
GO:0097428	BP	protein maturation by iron-sulfur cluster transfer	0.71579	0.983782	0.334369	1	Prupe.6G008100
GO:0043039	BP	tRNA aminoacylation	0.716284	0.983782	0.333678	1	Prupe.8G045400
GO:0030136	CC	clathrin-coated vesicle	0.717476	0.984546	0.332016	2	Prupe.1G524700, Prupe.2G235100
GO:0006508	BP	proteolysis	0.735494	0.984889	0.307213	62	Prupe.1G152100, Prupe.1G152200, Prupe.1G183700, Prupe.1G201000, Prupe.1G307100, Prupe.1G348100, Prupe.1G348300, Prupe.1G350500, Prupe.1G357500, Prupe.1G397600, Prupe.1G397700, Prupe.1G397900, Prupe.1G398100, Prupe.1G441000, Prupe.1G457200, Prupe.1G457300, Prupe.1G491400, Prupe.1G493500, Prupe.1G507800, Prupe.1G511100, Prupe.1G529800, Prupe.2G023900, Prupe.2G035100, Prupe.2G038800, Prupe.2G151900,…
GO:0031047	BP	gene silencing by RNA	0.734821	0.984889	0.308129	3	Prupe.1G132100, Prupe.5G027600, Prupe.8G202000
GO:0080167	BP	response to karrikin	0.721562	0.984889	0.326336	2	Prupe.7G064000, Prupe.8G087900
GO:0000463	BP	maturation of LSU-rRNA from tricistronic rRNA transcript (SSU-rRNA, 5.8S rRNA, LSU-rRNA)	0.7287	0.984889	0.316493	2	Prupe.8G015200, Prupe.8G015700
GO:0005986	BP	sucrose biosynthetic process	0.720504	0.984889	0.327805	1	Prupe.1G483200
GO:0072657	BP	protein localization to membrane	0.721933	0.984889	0.325823	1	Prupe.6G134800
GO:0032956	BP	regulation of actin cytoskeleton organization	0.722333	0.984889	0.325269	1	Prupe.7G226500
GO:0048367	BP	shoot system development	0.72329	0.984889	0.323945	1	Prupe.3G240100
GO:0001172	BP	transcription, RNA-templated	0.725938	0.984889	0.320291	1	Prupe.1G132100
GO:0019430	BP	removal of superoxide radicals	0.72825	0.984889	0.317111	1	Prupe.6G112800
GO:0015931	BP	nucleobase-containing compound transport	0.73212	0.984889	0.311811	1	Prupe.6G103500
GO:1901264	BP	carbohydrate derivative transport	0.73212	0.984889	0.311811	1	Prupe.6G103500
GO:0051453	BP	regulation of intracellular pH	0.733084	0.984889	0.310495	1	Prupe.2G128800
GO:0009640	BP	photomorphogenesis	0.733826	0.984889	0.309484	1	Prupe.8G087900
GO:0008284	BP	positive regulation of cell population proliferation	0.734506	0.984889	0.308557	1	Prupe.5G003700
GO:0006904	BP	vesicle docking involved in exocytosis	0.735018	0.984889	0.30786	1	Prupe.2G144900
GO:0031410	CC	cytoplasmic vesicle	0.725168	0.984889	0.321352	7	Prupe.1G524700, Prupe.2G040000, Prupe.2G235100, Prupe.3G155800, Prupe.3G233400, Prupe.7G015100, Prupe.7G226500
GO:0005905	CC	clathrin-coated pit	0.722106	0.984889	0.325583	2	Prupe.1G524700, Prupe.3G155800
GO:0005938	CC	cell cortex	0.728	0.984889	0.317454	2	Prupe.1G504400, Prupe.7G226500
GO:0031966	CC	mitochondrial membrane	0.728318	0.984889	0.317018	2	Prupe.2G040000, Prupe.7G015100
GO:0008023	CC	transcription elongation factor complex	0.720783	0.984889	0.327417	1	Prupe.6G206700
GO:0005801	CC	cis-Golgi network	0.734316	0.984889	0.308816	1	Prupe.2G324900
GO:0005484	MF	SNAP receptor activity	0.729301	0.984889	0.315669	4	Prupe.2G173700, Prupe.2G293800, Prupe.7G000700, Prupe.7G093400
GO:0004659	MF	prenyltransferase activity	0.725559	0.984889	0.320813	2	Prupe.1G346500, Prupe.4G215000
GO:0003968	MF	RNA-directed 5'-3' RNA polymerase activity	0.725938	0.984889	0.320291	1	Prupe.1G132100
GO:0030976	MF	thiamine pyrophosphate binding	0.732441	0.984889	0.311373	1	Prupe.2G230300
GO:0043024	MF	ribosomal small subunit binding	0.732508	0.984889	0.311281	1	Prupe.3G018700
GO:0031492	MF	nucleosomal DNA binding	0.733331	0.984889	0.310159	1	Prupe.1G330600
GO:0008610	BP	lipid biosynthetic process	0.739874	0.986499	0.301275	2	Prupe.2G112800, Prupe.2G113600
GO:0000122	BP	negative regulation of transcription by RNA polymerase II	0.738815	0.986499	0.302708	1	Prupe.1G140500
GO:0061817	BP	endoplasmic reticulum-plasma membrane tethering	0.738966	0.986499	0.302503	1	Prupe.2G139900
GO:0090158	BP	endoplasmic reticulum membrane organization	0.738966	0.986499	0.302503	1	Prupe.2G139900
GO:0000228	CC	nuclear chromosome	0.739313	0.986499	0.302034	1	Prupe.2G007300
GO:0016746	MF	transferase activity, transferring acyl groups	0.740979	0.987124	0.299783	16	Prupe.1G212000, Prupe.1G264300, Prupe.1G280400, Prupe.1G383800, Prupe.2G188400, Prupe.3G002400, Prupe.3G140400, Prupe.4G227300, Prupe.4G252100, Prupe.4G253000, Prupe.4G257800, Prupe.4G258100, Prupe.6G086800, Prupe.6G272900, Prupe.8G042200, Prupe.8G096100
GO:0017148	BP	negative regulation of translation	0.744292	0.988291	0.295322	3	Prupe.1G294500, Prupe.6G139300, Prupe.6G139800
GO:0006284	BP	base-excision repair	0.743145	0.988291	0.296865	2	Prupe.4G120400, Prupe.4G125700
GO:0007623	BP	circadian rhythm	0.743865	0.988291	0.295896	2	Prupe.2G212900, Prupe.4G124800
GO:0008199	MF	ferric iron binding	0.744866	0.988291	0.294551	1	Prupe.6G050900
GO:0004143	MF	diacylglycerol kinase activity	0.745039	0.988291	0.294319	1	Prupe.3G175800
GO:0009733	BP	response to auxin	0.749104	0.989684	0.288878	13	Prupe.1G221300, Prupe.1G367800, Prupe.1G384600, Prupe.3G035000, Prupe.3G035100, Prupe.7G104000, Prupe.7G192600, Prupe.8G078800, Prupe.8G079200, Prupe.8G080100, Prupe.8G081100, Prupe.8G082100, Prupe.8G235800
GO:0007275	BP	multicellular organism development	0.747556	0.989684	0.290947	11	Prupe.1G304700, Prupe.1G371500, Prupe.2G036500, Prupe.2G108600, Prupe.5G122400, Prupe.6G340600, Prupe.7G158700, Prupe.7G163600, Prupe.7G245200, Prupe.8G026100, Prupe.8G050100
GO:0043928	BP	exonucleolytic catabolism of deadenylated mRNA	0.751425	0.989684	0.285784	2	Prupe.6G139300, Prupe.6G139800
GO:0006970	BP	response to osmotic stress	0.754892	0.989684	0.28118	2	Prupe.4G067000, Prupe.6G286000
GO:0010087	BP	phloem or xylem histogenesis	0.75101	0.989684	0.286336	1	Prupe.8G235800
GO:0016584	BP	nucleosome positioning	0.751885	0.989684	0.285172	1	Prupe.1G330600
GO:0006535	BP	cysteine biosynthetic process from serine	0.751982	0.989684	0.285043	1	Prupe.6G338400
GO:0006122	BP	mitochondrial electron transport, ubiquinol to cytochrome c	0.753603	0.989684	0.282889	1	Prupe.8G028000
GO:0019344	BP	cysteine biosynthetic process	0.753997	0.989684	0.282366	1	Prupe.6G338400
GO:0009644	BP	response to high light intensity	0.755289	0.989684	0.280655	1	Prupe.3G005100
GO:0035434	BP	copper ion transmembrane transport	0.756277	0.989684	0.279348	1	Prupe.6G007600
GO:0009845	BP	seed germination	0.756292	0.989684	0.279328	1	Prupe.2G212900
GO:0101005	MF	ubiquitinyl hydrolase activity	0.749558	0.989684	0.288271	1	Prupe.8G102300
GO:0000036	MF	acyl carrier activity	0.751135	0.989684	0.28617	1	Prupe.3G074600
GO:0016868	MF	intramolecular transferase activity, phosphotransferases	0.752215	0.989684	0.284733	1	Prupe.1G512500
GO:0005338	MF	nucleotide-sugar transmembrane transporter activity	0.75366	0.989684	0.282813	1	Prupe.6G103500
GO:0005615	CC	extracellular space	0.757649	0.990624	0.277535	15	Prupe.1G091300, Prupe.1G091400, Prupe.1G283100, Prupe.1G303500, Prupe.1G520900, Prupe.4G111900, Prupe.6G031400, Prupe.6G112800, Prupe.6G159700, Prupe.7G146300, Prupe.7G264200, Prupe.8G131600, Prupe.8G152900, Prupe.8G179300, Prupe.8G181100
GO:0000776	CC	kinetochore	0.762491	0.996117	0.271164	1	Prupe.1G281000
GO:0006813	BP	potassium ion transport	0.763998	0.996408	0.26919	2	Prupe.1G472600, Prupe.5G236500
GO:0000245	BP	spliceosomal complex assembly	0.763608	0.996408	0.269701	1	Prupe.6G139700
GO:0007010	BP	cytoskeleton organization	0.768045	0.996859	0.263907	1	Prupe.7G033200
GO:0008283	BP	cell population proliferation	0.768357	0.996859	0.2635	1	Prupe.1G420000
GO:0030026	BP	cellular manganese ion homeostasis	0.769302	0.996859	0.262272	1	Prupe.8G027700
GO:0006621	BP	protein retention in ER lumen	0.770002	0.996859	0.261363	1	Prupe.2G324900
GO:0030042	BP	actin filament depolymerization	0.770511	0.996859	0.260701	1	Prupe.2G165300
GO:0006644	BP	phospholipid metabolic process	0.771796	0.996859	0.259034	1	Prupe.1G066500
GO:0045927	BP	positive regulation of growth	0.771972	0.996859	0.258807	1	Prupe.1G364500
GO:0009832	BP	plant-type cell wall biogenesis	0.772228	0.996859	0.258475	1	Prupe.3G249900
GO:0006825	BP	copper ion transport	0.773939	0.996859	0.256262	1	Prupe.6G007600
GO:0005694	CC	chromosome	0.766956	0.996859	0.265326	8	Prupe.1G169000, Prupe.1G216000, Prupe.2G064600, Prupe.2G232200, Prupe.3G017700, Prupe.7G028400, Prupe.7G185900, Prupe.8G250000
GO:0022626	CC	cytosolic ribosome	0.770879	0.996859	0.260224	1	Prupe.3G143800
GO:0051082	MF	unfolded protein binding	0.765968	0.996859	0.266615	14	Prupe.1G407100, Prupe.1G493700, Prupe.2G234200, Prupe.2G234300, Prupe.2G234400, Prupe.2G243800, Prupe.3G066800, Prupe.6G066100, Prupe.6G066300, Prupe.6G066400, Prupe.7G106500, Prupe.7G106700, Prupe.7G108100, Prupe.7G108500
GO:0031386	MF	protein tag	0.76931	0.996859	0.262261	3	Prupe.2G185300, Prupe.4G222000, Prupe.4G277000
GO:0005384	MF	manganese ion transmembrane transporter activity	0.773131	0.996859	0.257307	2	Prupe.1G492500, Prupe.8G027700
GO:0031491	MF	nucleosome binding	0.773979	0.996859	0.256211	1	Prupe.8G049400
GO:0016799	MF	hydrolase activity, hydrolyzing N-glycosyl compounds	0.774798	0.997087	0.255153	1	Prupe.6G103900
GO:0034605	BP	cellular response to heat	0.775914	0.997695	0.253714	2	Prupe.6G286000, Prupe.7G206900
GO:0006355	BP	regulation of transcription, DNA-templated	0.815915	1	0.203445	144	Prupe.1G005900, Prupe.1G084900, Prupe.1G114800, Prupe.1G208300, Prupe.1G227400, Prupe.1G252600, Prupe.1G260700, Prupe.1G263800, Prupe.1G269200, Prupe.1G274700, Prupe.1G284900, Prupe.1G287400, Prupe.1G304700, Prupe.1G313300, Prupe.1G330600, Prupe.1G371300, Prupe.1G378200, Prupe.1G393000, Prupe.1G393100, Prupe.1G407500, Prupe.1G419000, Prupe.1G433500, Prupe.1G437900, Prupe.1G447400, Prupe.1G480400,…
GO:0006351	BP	transcription, DNA-templated	0.958853	1	0.0420178	47	Prupe.1G084900, Prupe.1G208300, Prupe.1G287400, Prupe.1G304700, Prupe.1G371300, Prupe.1G419000, Prupe.1G437900, Prupe.1G480400, Prupe.1G517200, Prupe.1G538700, Prupe.2G047700, Prupe.2G060200, Prupe.2G147000, Prupe.2G190200, Prupe.2G213000, Prupe.2G289500, Prupe.2G317500, Prupe.3G001800, Prupe.3G009400, Prupe.3G019900, Prupe.3G041800, Prupe.3G307800, Prupe.4G055500, Prupe.4G055600, Prupe.4G178100,…
GO:0016567	BP	protein ubiquitination	0.999595	1	0.000404846	33	Prupe.1G256600, Prupe.1G319200, Prupe.1G336200, Prupe.1G360300, Prupe.1G364600, Prupe.1G452300, Prupe.1G501100, Prupe.2G085600, Prupe.2G185300, Prupe.2G253400, Prupe.2G319300, Prupe.3G068300, Prupe.3G068400, Prupe.3G077500, Prupe.3G164200, Prupe.4G002400, Prupe.4G119200, Prupe.5G122400, Prupe.5G134100, Prupe.5G140900, Prupe.5G175800, Prupe.6G014500, Prupe.6G115700, Prupe.6G145200, Prupe.6G202800,…
GO:0006357	BP	regulation of transcription by RNA polymerase II	0.998815	1	0.0011853	26	Prupe.1G181600, Prupe.1G371300, Prupe.1G433500, Prupe.1G523000, Prupe.1G524500, Prupe.1G538700, Prupe.2G047200, Prupe.2G127300, Prupe.2G194400, Prupe.2G198800, Prupe.3G015300, Prupe.3G197300, Prupe.3G307800, Prupe.5G175200, Prupe.5G208400, Prupe.6G162800, Prupe.6G206700, Prupe.7G030800, Prupe.7G039800, Prupe.7G039900, Prupe.7G040100, Prupe.7G056700, Prupe.7G133600, Prupe.7G191100, Prupe.7G206900,…
GO:0015031	BP	protein transport	0.999058	1	0.000942206	19	Prupe.1G308600, Prupe.2G173700, Prupe.2G226200, Prupe.2G324900, Prupe.3G018000, Prupe.3G070200, Prupe.3G233400, Prupe.3G236100, Prupe.4G018000, Prupe.4G217500, Prupe.5G205500, Prupe.6G026100, Prupe.6G026200, Prupe.6G026300, Prupe.6G247200, Prupe.7G000700, Prupe.7G093400, Prupe.7G178000, Prupe.8G061300
GO:0016311	BP	dephosphorylation	0.932316	1	0.0700835	16	Prupe.1G041200, Prupe.1G264300, Prupe.1G413800, Prupe.2G308300, Prupe.3G051900, Prupe.4G068500, Prupe.5G151400, Prupe.5G151500, Prupe.6G049100, Prupe.6G224900, Prupe.6G272900, Prupe.6G296600, Prupe.7G113300, Prupe.8G088900, Prupe.8G089000, Prupe.8G216700
GO:0006412	BP	translation	1	1	-6.36602e-13	15	Prupe.1G192700, Prupe.1G210800, Prupe.1G545600, Prupe.2G047200, Prupe.3G023200, Prupe.3G042800, Prupe.4G015300, Prupe.4G264500, Prupe.5G059500, Prupe.5G096900, Prupe.5G221500, Prupe.6G034300, Prupe.6G102500, Prupe.6G133500, Prupe.8G045400
GO:0090502	BP	RNA phosphodiester bond hydrolysis, endonucleolytic	0.976157	1	0.0241316	13	Prupe.1G275400, Prupe.2G022700, Prupe.2G048800, Prupe.3G063400, Prupe.3G213200, Prupe.4G174500, Prupe.4G219300, Prupe.4G219500, Prupe.5G044600, Prupe.6G123500, Prupe.6G141500, Prupe.8G042700, Prupe.8G202000
GO:0006486	BP	protein glycosylation	0.83601	1	0.179114	11	Prupe.1G110700, Prupe.1G166300, Prupe.1G581600, Prupe.2G117600, Prupe.4G020000, Prupe.5G133400, Prupe.6G127500, Prupe.6G185800, Prupe.6G186000, Prupe.7G121600, Prupe.8G004600
GO:0006631	BP	fatty acid metabolic process	0.7974	1	0.226398	10	Prupe.1G233400, Prupe.2G005300, Prupe.2G171800, Prupe.3G035800, Prupe.3G074600, Prupe.6G181800, Prupe.6G324100, Prupe.6G324200, Prupe.6G324400, Prupe.7G067100
GO:0006633	BP	fatty acid biosynthetic process	0.913057	1	0.090957	10	Prupe.1G233400, Prupe.2G005300, Prupe.3G035800, Prupe.3G074600, Prupe.6G086800, Prupe.6G324100, Prupe.6G324200, Prupe.6G324400, Prupe.8G042200, Prupe.8G096100
GO:0006396	BP	RNA processing	0.798873	1	0.224553	8	Prupe.2G157900, Prupe.2G164500, Prupe.3G213200, Prupe.4G219300, Prupe.4G219500, Prupe.6G139700, Prupe.8G042700, Prupe.8G202000
GO:0090305	BP	nucleic acid phosphodiester bond hydrolysis	0.980932	1	0.0192522	8	Prupe.1G164900, Prupe.1G275400, Prupe.4G179100, Prupe.6G139300, Prupe.6G139800, Prupe.6G141200, Prupe.6G315500, Prupe.8G202000
GO:0045454	BP	cell redox homeostasis	0.994744	1	0.00526981	8	Prupe.1G140500, Prupe.1G410500, Prupe.2G073600, Prupe.2G094300, Prupe.4G167400, Prupe.7G092000, Prupe.7G109100, Prupe.8G254300
GO:0006511	BP	ubiquitin-dependent protein catabolic process	0.999901	1	9.91812e-05	8	Prupe.1G008300, Prupe.2G085600, Prupe.3G183900, Prupe.4G119200, Prupe.5G122400, Prupe.6G115700, Prupe.8G015800, Prupe.8G106100
GO:0006886	BP	intracellular protein transport	0.999917	1	8.27712e-05	8	Prupe.1G109200, Prupe.2G144900, Prupe.2G173700, Prupe.3G155800, Prupe.4G018000, Prupe.4G217500, Prupe.7G000700, Prupe.7G093400
GO:0045944	BP	positive regulation of transcription by RNA polymerase II	0.995093	1	0.00491945	7	Prupe.1G371300, Prupe.1G538700, Prupe.3G197300, Prupe.3G307800, Prupe.5G208400, Prupe.7G155400, Prupe.8G256000
GO:0006470	BP	protein dephosphorylation	0.998469	1	0.00153212	7	Prupe.1G041200, Prupe.1G246400, Prupe.4G068500, Prupe.5G202500, Prupe.6G049100, Prupe.6G224900, Prupe.7G119400
GO:0006281	BP	DNA repair	0.998654	1	0.00134719	7	Prupe.1G328900, Prupe.4G120400, Prupe.4G125700, Prupe.4G268900, Prupe.5G205700, Prupe.6G025200, Prupe.7G076100
GO:0006457	BP	protein folding	0.998801	1	0.0011999	7	Prupe.1G407100, Prupe.1G493700, Prupe.2G243800, Prupe.3G066800, Prupe.6G066100, Prupe.6G066300, Prupe.6G066400
GO:0016192	BP	vesicle-mediated transport	0.999864	1	0.000136231	7	Prupe.1G109200, Prupe.2G144900, Prupe.3G155800, Prupe.4G018000, Prupe.4G217500, Prupe.7G000700, Prupe.7G093400
GO:0009416	BP	response to light stimulus	0.840774	1	0.173433	6	Prupe.1G467600, Prupe.1G502700, Prupe.3G006700, Prupe.3G118100, Prupe.3G174600, Prupe.4G080700
GO:0050790	BP	regulation of catalytic activity	0.978683	1	0.0215474	6	Prupe.1G384400, Prupe.2G170400, Prupe.4G087300, Prupe.5G015000, Prupe.6G053300, Prupe.6G264800
GO:0000398	BP	mRNA splicing, via spliceosome	0.998615	1	0.00138575	6	Prupe.1G161500, Prupe.1G203900, Prupe.3G009200, Prupe.6G139700, Prupe.6G164200, Prupe.7G247900
GO:0018215	BP	protein phosphopantetheinylation	0.999817	1	0.000182716	6	Prupe.1G212000, Prupe.1G280400, Prupe.2G052800, Prupe.3G002400, Prupe.7G085600, Prupe.8G102300
GO:0006812	BP	cation transport	0.936162	1	0.0659667	5	Prupe.1G078700, Prupe.1G346300, Prupe.2G257000, Prupe.3G192400, Prupe.4G283500
GO:0000209	BP	protein polyubiquitination	0.962422	1	0.0383018	5	Prupe.1G008300, Prupe.4G256900, Prupe.5G033600, Prupe.6G047000, Prupe.6G115700
GO:1902600	BP	proton transmembrane transport	0.989111	1	0.0109485	5	Prupe.1G346300, Prupe.2G128800, Prupe.2G257000, Prupe.4G283500, Prupe.6G005500
GO:0006397	BP	mRNA processing	0.999819	1	0.000181242	5	Prupe.2G080400, Prupe.6G164200, Prupe.8G026600, Prupe.8G042700, Prupe.8G167600
GO:0006096	BP	glycolytic process	0.885921	1	0.121127	4	Prupe.1G512500, Prupe.6G076300, Prupe.6G212100, Prupe.6G232800
GO:0042908	BP	xenobiotic transport	0.953773	1	0.0473293	4	Prupe.1G524800, Prupe.2G299200, Prupe.7G026300, Prupe.7G218600
GO:0006888	BP	endoplasmic reticulum to Golgi vesicle-mediated transport	0.985521	1	0.0145849	4	Prupe.2G293800, Prupe.2G324900, Prupe.4G018000, Prupe.4G217500
GO:0008652	BP	cellular amino acid biosynthetic process	0.993128	1	0.00689556	4	Prupe.6G116600, Prupe.6G166100, Prupe.6G338400, Prupe.8G155300
GO:0008380	BP	RNA splicing	0.994186	1	0.00583099	4	Prupe.1G368500, Prupe.1G422500, Prupe.6G164200, Prupe.8G042700
GO:0035556	BP	intracellular signal transduction	0.997206	1	0.00279801	4	Prupe.4G073500, Prupe.4G232100, Prupe.7G090800, Prupe.8G182900
GO:0015672	BP	monovalent inorganic cation transport	0.780454	1	0.24788	3	Prupe.1G346300, Prupe.2G257000, Prupe.4G283500
GO:0000028	BP	ribosomal small subunit assembly	0.838902	1	0.175661	3	Prupe.1G545600, Prupe.2G157900, Prupe.6G133500
GO:0006730	BP	one-carbon metabolic process	0.844124	1	0.169456	3	Prupe.1G539400, Prupe.4G263400, Prupe.6G104900
GO:0006885	BP	regulation of pH	0.850244	1	0.162232	3	Prupe.1G346300, Prupe.2G257000, Prupe.4G283500
GO:0098655	BP	cation transmembrane transport	0.878237	1	0.129838	3	Prupe.1G078700, Prupe.4G086300, Prupe.5G024400
GO:0006418	BP	tRNA aminoacylation for protein translation	0.881142	1	0.126537	3	Prupe.5G096900, Prupe.8G045400, Prupe.8G192100
GO:0000724	BP	double-strand break repair via homologous recombination	0.962152	1	0.0385828	3	Prupe.5G205700, Prupe.6G241500, Prupe.8G031700
GO:0009414	BP	response to water deprivation	0.965891	1	0.0347039	3	Prupe.3G005100, Prupe.6G286000, Prupe.7G161200
GO:0010468	BP	regulation of gene expression	0.99127	1	0.00876838	3	Prupe.5G003700, Prupe.6G023800, Prupe.6G167600
GO:0006260	BP	DNA replication	0.993951	1	0.00606714	3	Prupe.1G438300, Prupe.4G268900, Prupe.5G205700
GO:0043161	BP	proteasome-mediated ubiquitin-dependent protein catabolic process	0.99529	1	0.00472125	3	Prupe.1G488100, Prupe.1G488300, Prupe.3G183900
GO:0051603	BP	proteolysis involved in cellular protein catabolic process	0.995735	1	0.00427367	3	Prupe.3G183900, Prupe.8G131600, Prupe.8G181100
GO:0042254	BP	ribosome biogenesis	0.996194	1	0.0038132	3	Prupe.1G572400, Prupe.8G015200, Prupe.8G015700
GO:0009658	BP	chloroplast organization	0.999374	1	0.00062668	3	Prupe.1G005900, Prupe.2G040300, Prupe.4G059200
GO:0051726	BP	regulation of cell cycle	0.788234	1	0.23796	2	Prupe.3G228000, Prupe.4G034400
GO:0071577	BP	zinc ion transmembrane transport	0.788312	1	0.237861	2	Prupe.1G078700, Prupe.4G117100
GO:0071421	BP	manganese ion transmembrane transport	0.79805	1	0.225584	2	Prupe.1G492500, Prupe.8G027700
GO:0072583	BP	clathrin-dependent endocytosis	0.805755	1	0.215976	2	Prupe.1G524700, Prupe.3G155800
GO:0006623	BP	protein targeting to vacuole	0.808227	1	0.212912	2	Prupe.4G119200, Prupe.8G015800
GO:0006400	BP	tRNA modification	0.82965	1	0.186752	2	Prupe.1G312400, Prupe.6G232800
GO:0031640	BP	killing of cells of other organism	0.84883	1	0.163897	2	Prupe.1G376000, Prupe.7G095800
GO:0098656	BP	anion transmembrane transport	0.85345	1	0.158468	2	Prupe.1G558300, Prupe.2G279100
GO:0030433	BP	ubiquitin-dependent ERAD pathway	0.914871	1	0.0889719	2	Prupe.2G273500, Prupe.4G237600
GO:0034599	BP	cellular response to oxidative stress	0.922487	1	0.0806817	2	Prupe.6G242200, Prupe.7G171100
GO:0018298	BP	protein-chromophore linkage	0.926418	1	0.0764301	2	Prupe.3G174600, Prupe.5G092500
GO:0071805	BP	potassium ion transmembrane transport	0.927749	1	0.0749945	2	Prupe.1G472600, Prupe.5G236500
GO:0046686	BP	response to cadmium ion	0.93105	1	0.0714424	2	Prupe.4G189300, Prupe.7G056700
GO:0032508	BP	DNA duplex unwinding	0.934401	1	0.0678501	2	Prupe.6G241500, Prupe.8G031700
GO:0006897	BP	endocytosis	0.942662	1	0.0590478	2	Prupe.1G524700, Prupe.2G235100
GO:0006325	BP	chromatin organization	0.949328	1	0.0520009	2	Prupe.6G011600, Prupe.8G049400
GO:0009555	BP	pollen development	0.959504	1	0.0413387	2	Prupe.2G007300, Prupe.6G241500
GO:0006310	BP	DNA recombination	0.97108	1	0.0293461	2	Prupe.5G205700, Prupe.7G076100
GO:0006353	BP	DNA-templated transcription, termination	0.988692	1	0.0113729	2	Prupe.1G005900, Prupe.2G040300
GO:0016579	BP	protein deubiquitination	0.990853	1	0.0091892	2	Prupe.2G052800, Prupe.8G102300
GO:0008033	BP	tRNA processing	0.996418	1	0.00358821	2	Prupe.1G312400, Prupe.6G206700
GO:0015979	BP	photosynthesis	0.999983	1	1.73652e-05	2	Prupe.1G021500, Prupe.3G174600
GO:0006364	BP	rRNA processing	0.999984	1	1.57328e-05	2	Prupe.8G015200, Prupe.8G015700
GO:0009451	BP	RNA modification	1	1	9.041e-08	2	Prupe.2G157900, Prupe.5G003100
GO:0007059	BP	chromosome segregation	0.786665	1	0.239952	1	Prupe.2G138600
GO:0071704	BP	organic substance metabolic process	0.788929	1	0.237079	1	Prupe.6G181100
GO:0034755	BP	iron ion transmembrane transport	0.794778	1	0.229692	1	Prupe.8G027700
GO:0006879	BP	cellular iron ion homeostasis	0.796963	1	0.226947	1	Prupe.6G050900
GO:0006614	BP	SRP-dependent cotranslational protein targeting to membrane	0.797153	1	0.226709	1	Prupe.8G050200
GO:0007064	BP	mitotic sister chromatid cohesion	0.799865	1	0.223313	1	Prupe.2G007300
GO:1904668	BP	positive regulation of ubiquitin protein ligase activity	0.804929	1	0.217001	1	Prupe.4G247700
GO:0000460	BP	maturation of 5.8S rRNA	0.810884	1	0.20963	1	Prupe.8G011700
GO:0009097	BP	isoleucine biosynthetic process	0.810973	1	0.20952	1	Prupe.6G116600
GO:0030490	BP	maturation of SSU-rRNA	0.817876	1	0.201045	1	Prupe.1G545600
GO:0009631	BP	cold acclimation	0.823575	1	0.194101	1	Prupe.7G161200
GO:0048316	BP	seed development	0.825743	1	0.191471	1	Prupe.8G131900
GO:0007264	BP	small GTPase mediated signal transduction	0.826311	1	0.190784	1	Prupe.7G226500
GO:0015914	BP	phospholipid transport	0.829413	1	0.187037	1	Prupe.3G046100
GO:0045910	BP	negative regulation of DNA recombination	0.830792	1	0.185376	1	Prupe.1G330600
GO:0019748	BP	secondary metabolic process	0.838884	1	0.175682	1	Prupe.8G148400
GO:0046835	BP	carbohydrate phosphorylation	0.84491	1	0.168525	1	Prupe.6G212100
GO:0009060	BP	aerobic respiration	0.849868	1	0.162674	1	Prupe.8G028000
GO:0016554	BP	cytidine to uridine editing	0.855656	1	0.155887	1	Prupe.2G080400
GO:0006406	BP	mRNA export from nucleus	0.858578	1	0.152478	1	Prupe.8G026600
GO:0009691	BP	cytokinin biosynthetic process	0.863711	1	0.146517	1	Prupe.6G103900
GO:0006302	BP	double-strand break repair	0.866175	1	0.143668	1	Prupe.3G262700
GO:0006415	BP	translational termination	0.866239	1	0.143595	1	Prupe.3G018700
GO:0015698	BP	inorganic anion transport	0.869311	1	0.140055	1	Prupe.3G077900
GO:0010052	BP	guard cell differentiation	0.869959	1	0.139309	1	Prupe.8G050100
GO:0009739	BP	response to gibberellin	0.870184	1	0.13905	1	Prupe.1G435600
GO:0009553	BP	embryo sac development	0.870384	1	0.138821	1	Prupe.3G049600
GO:0010150	BP	leaf senescence	0.871115	1	0.137982	1	Prupe.4G276500
GO:0009725	BP	response to hormone	0.874369	1	0.134252	1	Prupe.2G213000
GO:0035999	BP	tetrahydrofolate interconversion	0.874387	1	0.134232	1	Prupe.1G539400
GO:0006261	BP	DNA-dependent DNA replication	0.876964	1	0.13129	1	Prupe.4G268900
GO:0009853	BP	photorespiration	0.877177	1	0.131047	1	Prupe.3G037200
GO:0006596	BP	polyamine biosynthetic process	0.879796	1	0.128066	1	Prupe.1G011700
GO:0009826	BP	unidimensional cell growth	0.881941	1	0.12563	1	Prupe.3G265800
GO:0009860	BP	pollen tube growth	0.887964	1	0.118824	1	Prupe.6G360900
GO:0048268	BP	clathrin coat assembly	0.888759	1	0.11793	1	Prupe.3G155800
GO:0009735	BP	response to cytokinin	0.893223	1	0.112919	1	Prupe.8G131900
GO:0046854	BP	phosphatidylinositol phosphorylation	0.894784	1	0.111173	1	Prupe.2G037500
GO:0002098	BP	tRNA wobble uridine modification	0.903136	1	0.101882	1	Prupe.6G206700
GO:0006465	BP	signal peptide processing	0.9038	1	0.101147	1	Prupe.1G491400
GO:0006541	BP	glutamine metabolic process	0.909155	1	0.0952397	1	Prupe.1G316200
GO:0032981	BP	mitochondrial respiratory chain complex I assembly	0.911438	1	0.0927314	1	Prupe.3G259500
GO:0006900	BP	vesicle budding from membrane	0.91158	1	0.0925754	1	Prupe.1G524700
GO:0030968	BP	endoplasmic reticulum unfolded protein response	0.912268	1	0.0918218	1	Prupe.2G273500
GO:0006995	BP	cellular response to nitrogen starvation	0.914044	1	0.0898763	1	Prupe.4G067000
GO:0006342	BP	chromatin silencing	0.914292	1	0.0896049	1	Prupe.8G250000
GO:0010027	BP	thylakoid membrane organization	0.914998	1	0.0888334	1	Prupe.1G491400
GO:0019941	BP	modification-dependent protein catabolic process	0.91692	1	0.0867349	1	Prupe.2G185300
GO:0051321	BP	meiotic cell cycle	0.917534	1	0.0860658	1	Prupe.5G205700
GO:0002183	BP	cytoplasmic translational initiation	0.918127	1	0.0854195	1	Prupe.3G045600
GO:0043547	BP	positive regulation of GTPase activity	0.926014	1	0.0768655	1	Prupe.1G466000
GO:0006744	BP	ubiquinone biosynthetic process	0.926986	1	0.0758163	1	Prupe.1G346500
GO:0010374	BP	stomatal complex development	0.930425	1	0.0721133	1	Prupe.8G050100
GO:0015986	BP	ATP synthesis coupled proton transport	0.930471	1	0.0720647	1	Prupe.3G052200
GO:0080156	BP	mitochondrial mRNA modification	0.93256	1	0.0698214	1	Prupe.2G080400
GO:0034219	BP	carbohydrate transmembrane transport	0.935826	1	0.0663258	1	Prupe.8G017400
GO:0000387	BP	spliceosomal snRNP assembly	0.936712	1	0.0653791	1	Prupe.7G003500
GO:0001522	BP	pseudouridine synthesis	0.937045	1	0.0650245	1	Prupe.2G157900
GO:0031145	BP	anaphase-promoting complex-dependent catabolic process	0.937972	1	0.0640351	1	Prupe.4G256900
GO:0009116	BP	nucleoside metabolic process	0.938523	1	0.0634477	1	Prupe.1G482300
GO:0010499	BP	proteasomal ubiquitin-independent protein catabolic process	0.93905	1	0.0628867	1	Prupe.3G183900
GO:0006368	BP	transcription elongation from RNA polymerase II promoter	0.940298	1	0.0615588	1	Prupe.2G047200
GO:0018108	BP	peptidyl-tyrosine phosphorylation	0.943836	1	0.0578024	1	Prupe.3G054500
GO:0010228	BP	vegetative to reproductive phase transition of meristem	0.944385	1	0.0572209	1	Prupe.2G147000
GO:0009765	BP	photosynthesis, light harvesting	0.947724	1	0.0536918	1	Prupe.3G174600
GO:0009768	BP	photosynthesis, light harvesting in photosystem I	0.947724	1	0.0536918	1	Prupe.3G174600
GO:0006807	BP	nitrogen compound metabolic process	0.948	1	0.0534004	1	Prupe.3G081000
GO:0043666	BP	regulation of phosphoprotein phosphatase activity	0.949139	1	0.0521996	1	Prupe.8G169200
GO:0000470	BP	maturation of LSU-rRNA	0.955212	1	0.0458223	1	Prupe.8G011700
GO:0032436	BP	positive regulation of proteasomal ubiquitin-dependent protein catabolic process	0.958984	1	0.0418807	1	Prupe.6G115700
GO:0071712	BP	ER-associated misfolded protein catabolic process	0.959038	1	0.041825	1	Prupe.4G237600
GO:0006890	BP	retrograde vesicle-mediated transport, Golgi to endoplasmic reticulum	0.962434	1	0.0382898	1	Prupe.2G293800
GO:0008643	BP	carbohydrate transport	0.962748	1	0.0379636	1	Prupe.8G017400
GO:0016226	BP	iron-sulfur cluster assembly	0.96795	1	0.0325751	1	Prupe.6G008100
GO:0007131	BP	reciprocal meiotic recombination	0.968409	1	0.0321003	1	Prupe.6G192500
GO:0006289	BP	nucleotide-excision repair	0.971978	1	0.0284216	1	Prupe.5G205700
GO:0000462	BP	maturation of SSU-rRNA from tricistronic rRNA transcript (SSU-rRNA, 5.8S rRNA, LSU-rRNA)	0.975075	1	0.0252411	1	Prupe.6G133500
GO:0070475	BP	rRNA base methylation	0.975467	1	0.0248393	1	Prupe.3G193200
GO:0006487	BP	protein N-linked glycosylation	0.975824	1	0.0244728	1	Prupe.2G117600
GO:0009908	BP	flower development	0.980138	1	0.0200623	1	Prupe.6G334600
GO:0009073	BP	aromatic amino acid family biosynthetic process	0.985896	1	0.0142047	1	Prupe.6G166100
GO:0006099	BP	tricarboxylic acid cycle	0.990012	1	0.0100379	1	Prupe.2G230300
GO:0048364	BP	root development	0.990621	1	0.00942332	1	Prupe.2G264300
GO:0000027	BP	ribosomal large subunit assembly	0.996791	1	0.00321433	1	Prupe.6G064500
GO:0018105	BP	peptidyl-serine phosphorylation	0.997985	1	0.00201734	1	Prupe.7G090800
GO:0006413	BP	translational initiation	0.999066	1	0.000934876	1	Prupe.3G018700
GO:0000160	BP	phosphorelay signal transduction system	0.999498	1	0.000502259	1	Prupe.6G123100
GO:0006974	BP	cellular response to DNA damage stimulus	0.999966	1	3.40943e-05	1	Prupe.7G076100
GO:0005634	CC	nucleus	1	1	3.66776e-09	328	Prupe.1G008300, Prupe.1G030500, Prupe.1G039200, Prupe.1G041200, Prupe.1G084900, Prupe.1G114800, Prupe.1G125300, Prupe.1G127200, Prupe.1G127300, Prupe.1G127400, Prupe.1G127500, Prupe.1G127700, Prupe.1G127800, Prupe.1G127900, Prupe.1G128400, Prupe.1G128700, Prupe.1G129000, Prupe.1G150700, Prupe.1G164900, Prupe.1G181600, Prupe.1G208300, Prupe.1G211200, Prupe.1G216000, Prupe.1G227400, Prupe.1G232600,…
GO:0005737	CC	cytoplasm	0.999992	1	8.01985e-06	167	Prupe.1G054900, Prupe.1G055000, Prupe.1G056100, Prupe.1G127200, Prupe.1G127300, Prupe.1G127400, Prupe.1G127500, Prupe.1G127700, Prupe.1G127800, Prupe.1G127900, Prupe.1G128400, Prupe.1G128700, Prupe.1G129000, Prupe.1G140500, Prupe.1G164900, Prupe.1G226800, Prupe.1G278700, Prupe.1G283400, Prupe.1G294000, Prupe.1G332500, Prupe.1G333900, Prupe.1G335600, Prupe.1G338000, Prupe.1G343000, Prupe.1G345300,…
GO:0005829	CC	cytosol	1	1	5.98537e-10	52	Prupe.1G041200, Prupe.1G155600, Prupe.1G245400, Prupe.1G302900, Prupe.1G303000, Prupe.1G339000, Prupe.1G339900, Prupe.1G356700, Prupe.1G357500, Prupe.1G366100, Prupe.1G482300, Prupe.1G493700, Prupe.2G052800, Prupe.2G150200, Prupe.2G178100, Prupe.2G178300, Prupe.2G261200, Prupe.3G016000, Prupe.3G056300, Prupe.3G066800, Prupe.3G079400, Prupe.3G155800, Prupe.3G218700, Prupe.3G249900, Prupe.3G296200,…
GO:0005783	CC	endoplasmic reticulum	0.99867	1	0.00133113	32	Prupe.1G015700, Prupe.1G212000, Prupe.1G239200, Prupe.1G280400, Prupe.1G388500, Prupe.2G108600, Prupe.2G117600, Prupe.2G273500, Prupe.2G279400, Prupe.2G324900, Prupe.3G002400, Prupe.3G049700, Prupe.3G132900, Prupe.4G018000, Prupe.4G106500, Prupe.4G106600, Prupe.4G106700, Prupe.4G106900, Prupe.4G217500, Prupe.5G033600, Prupe.5G224500, Prupe.5G233100, Prupe.6G047000, Prupe.6G058100, Prupe.6G126900,…
GO:0009507	CC	chloroplast	1	1	0	27	Prupe.1G005900, Prupe.1G021500, Prupe.1G233400, Prupe.1G397200, Prupe.1G448400, Prupe.2G040300, Prupe.2G269900, Prupe.2G279100, Prupe.3G009900, Prupe.3G074600, Prupe.3G092000, Prupe.3G127100, Prupe.3G174600, Prupe.4G124800, Prupe.4G189300, Prupe.4G246800, Prupe.4G250300, Prupe.5G099600, Prupe.6G022400, Prupe.6G050900, Prupe.6G242200, Prupe.7G029900, Prupe.7G171100, Prupe.7G270900, Prupe.8G093400,…
GO:0005789	CC	endoplasmic reticulum membrane	0.99356	1	0.00646061	20	Prupe.2G112800, Prupe.2G113600, Prupe.2G117600, Prupe.2G139900, Prupe.2G273500, Prupe.2G279400, Prupe.2G293800, Prupe.2G324900, Prupe.3G049700, Prupe.3G132900, Prupe.4G018000, Prupe.4G106500, Prupe.4G106600, Prupe.4G106700, Prupe.4G106900, Prupe.4G217500, Prupe.5G224500, Prupe.7G050800, Prupe.7G187000, Prupe.7G261500
GO:0043231	CC	intracellular membrane-bounded organelle	0.997697	1	0.00230567	18	Prupe.1G023400, Prupe.1G457300, Prupe.2G026200, Prupe.2G235100, Prupe.3G044500, Prupe.3G256000, Prupe.3G256100, Prupe.3G256300, Prupe.3G260000, Prupe.3G260100, Prupe.4G182000, Prupe.5G003100, Prupe.5G229600, Prupe.6G126600, Prupe.6G126800, Prupe.6G126900, Prupe.6G203500, Prupe.7G226500
GO:0000139	CC	Golgi membrane	0.978112	1	0.0221312	15	Prupe.1G110700, Prupe.1G166300, Prupe.1G581600, Prupe.1G582100, Prupe.2G293800, Prupe.4G020000, Prupe.4G201700, Prupe.5G133400, Prupe.6G127500, Prupe.6G134800, Prupe.6G185800, Prupe.6G186000, Prupe.6G239800, Prupe.7G121600, Prupe.8G004600
GO:0005840	CC	ribosome	1	1	3.1708e-10	14	Prupe.1G192700, Prupe.1G210800, Prupe.1G545600, Prupe.2G047200, Prupe.2G157900, Prupe.3G023200, Prupe.3G042800, Prupe.4G015300, Prupe.4G264500, Prupe.5G059500, Prupe.5G221500, Prupe.6G034300, Prupe.6G102500, Prupe.6G133500
GO:0005739	CC	mitochondrion	1	1	0	14	Prupe.1G312400, Prupe.1G346500, Prupe.2G080400, Prupe.2G230300, Prupe.3G052200, Prupe.3G243500, Prupe.4G037100, Prupe.6G008100, Prupe.6G102500, Prupe.6G212100, Prupe.8G008800, Prupe.8G028000, Prupe.8G122200, Prupe.8G192100
GO:0005774	CC	vacuolar membrane	0.8784	1	0.129653	13	Prupe.1G236100, Prupe.2G305600, Prupe.3G051600, Prupe.3G051700, Prupe.3G192400, Prupe.3G298400, Prupe.4G086300, Prupe.4G137000, Prupe.4G235300, Prupe.5G112700, Prupe.I000500, Prupe.I000600, Prupe.I000700
GO:0000785	CC	chromatin	0.998237	1	0.00176481	12	Prupe.1G320600, Prupe.1G330600, Prupe.1G371300, Prupe.1G524500, Prupe.1G538700, Prupe.2G007300, Prupe.2G198800, Prupe.3G307800, Prupe.5G208400, Prupe.7G030800, Prupe.8G049400, Prupe.8G250000
GO:0005730	CC	nucleolus	0.999436	1	0.000563943	12	Prupe.1G330600, Prupe.1G572400, Prupe.2G007300, Prupe.2G164500, Prupe.3G262700, Prupe.6G014700, Prupe.6G064500, Prupe.6G229300, Prupe.8G011700, Prupe.8G015200, Prupe.8G015700, Prupe.8G202000
GO:0005623	CC	cell	0.959852	1	0.0409758	10	Prupe.1G140500, Prupe.1G410500, Prupe.2G073600, Prupe.2G094300, Prupe.4G167400, Prupe.6G050900, Prupe.6G212100, Prupe.7G092000, Prupe.7G109100, Prupe.8G254300
GO:0005622	CC	intracellular	0.999955	1	4.54183e-05	8	Prupe.1G109200, Prupe.1G318400, Prupe.2G140000, Prupe.2G173700, Prupe.6G123100, Prupe.7G226500, Prupe.8G087900, Prupe.8G182900
GO:0009536	CC	plastid	0.999998	1	2.35562e-06	8	Prupe.1G021500, Prupe.1G155600, Prupe.1G233400, Prupe.1G397200, Prupe.2G269900, Prupe.3G074600, Prupe.3G174600, Prupe.5G099600
GO:0012505	CC	endomembrane system	0.944713	1	0.0568743	7	Prupe.1G346300, Prupe.1G383800, Prupe.2G173700, Prupe.2G257000, Prupe.4G283500, Prupe.7G000700, Prupe.7G093400
GO:0005777	CC	peroxisome	0.913387	1	0.0905961	6	Prupe.1G145600, Prupe.4G037100, Prupe.4G189300, Prupe.6G181800, Prupe.7G067100, Prupe.8G188800
GO:0022627	CC	cytosolic small ribosomal subunit	0.98428	1	0.0158449	6	Prupe.1G545600, Prupe.2G157900, Prupe.3G042800, Prupe.4G264500, Prupe.5G059500, Prupe.6G133500
GO:0009570	CC	chloroplast stroma	0.999999	1	1.19584e-06	6	Prupe.1G449100, Prupe.3G094600, Prupe.4G263400, Prupe.6G058100, Prupe.6G104900, Prupe.6G112800
GO:0005768	CC	endosome	0.99989	1	0.000109616	5	Prupe.2G235100, Prupe.2G290800, Prupe.4G119200, Prupe.7G116800, Prupe.8G015800
GO:0031201	CC	SNARE complex	0.783142	1	0.244442	4	Prupe.2G173700, Prupe.2G293800, Prupe.7G000700, Prupe.7G093400
GO:0071013	CC	catalytic step 2 spliceosome	0.937242	1	0.0648137	4	Prupe.1G368500, Prupe.1G422500, Prupe.2G078200, Prupe.2G078300
GO:0005743	CC	mitochondrial inner membrane	0.999966	1	3.35735e-05	4	Prupe.1G346500, Prupe.4G037100, Prupe.4G244400, Prupe.8G028000
GO:0009535	CC	chloroplast thylakoid membrane	1	1	1.65598e-08	4	Prupe.1G021500, Prupe.1G491400, Prupe.2G269900, Prupe.3G174600
GO:0000932	CC	P-body	0.889476	1	0.117123	3	Prupe.6G135600, Prupe.6G139300, Prupe.6G139800
GO:0009579	CC	thylakoid	0.999668	1	0.000332481	3	Prupe.1G021500, Prupe.3G174600, Prupe.6G112800
GO:0009941	CC	chloroplast envelope	1	1	3.86996e-07	3	Prupe.3G140300, Prupe.3G174600, Prupe.4G086300
GO:0005689	CC	U12-type spliceosomal complex	0.797005	1	0.226894	2	Prupe.1G203900, Prupe.7G247900
GO:0031012	CC	extracellular matrix	0.805505	1	0.216286	2	Prupe.2G152000, Prupe.3G041700
GO:0009707	CC	chloroplast outer membrane	0.864614	1	0.145472	2	Prupe.1G388500, Prupe.4G059200
GO:1990904	CC	ribonucleoprotein complex	0.969899	1	0.0305633	2	Prupe.3G056300, Prupe.3G126400
GO:0005764	CC	lysosome	0.988805	1	0.0112585	2	Prupe.8G131600, Prupe.8G181100
GO:0015935	CC	small ribosomal subunit	0.991344	1	0.00869343	2	Prupe.4G264500, Prupe.5G059500
GO:0022625	CC	cytosolic large ribosomal subunit	1	1	1.68662e-07	2	Prupe.1G210800, Prupe.6G034300
GO:0031011	CC	Ino80 complex	0.783674	1	0.243762	1	Prupe.6G245300
GO:0071014	CC	post-mRNA release spliceosomal complex	0.786995	1	0.239533	1	Prupe.6G139700
GO:0071944	CC	cell periphery	0.815166	1	0.204364	1	Prupe.4G048800
GO:0005667	CC	transcription regulator complex	0.830266	1	0.186009	1	Prupe.6G139700
GO:0005684	CC	U2-type spliceosomal complex	0.834692	1	0.180692	1	Prupe.1G161500
GO:0000159	CC	protein phosphatase type 2A complex	0.847057	1	0.165987	1	Prupe.8G169200
GO:0000974	CC	Prp19 complex	0.855946	1	0.155548	1	Prupe.6G139700
GO:0012507	CC	ER to Golgi transport vesicle membrane	0.857135	1	0.15416	1	Prupe.2G293800
GO:0005778	CC	peroxisomal membrane	0.868982	1	0.140433	1	Prupe.7G187000
GO:0005793	CC	endoplasmic reticulum-Golgi intermediate compartment	0.891274	1	0.115104	1	Prupe.2G293800
GO:0070847	CC	core mediator complex	0.914533	1	0.0893422	1	Prupe.1G181600
GO:0005852	CC	eukaryotic translation initiation factor 3 complex	0.923441	1	0.0796487	1	Prupe.3G018700
GO:0010008	CC	endosome membrane	0.924476	1	0.0785287	1	Prupe.6G134800
GO:0005682	CC	U5 snRNP	0.930796	1	0.071715	1	Prupe.6G164200
GO:0005736	CC	RNA polymerase I complex	0.934304	1	0.0679538	1	Prupe.2G047700
GO:0005839	CC	proteasome core complex	0.93671	1	0.0653814	1	Prupe.3G183900
GO:0005665	CC	RNA polymerase II, core complex	0.944838	1	0.0567415	1	Prupe.8G132400
GO:0031305	CC	integral component of mitochondrial inner membrane	0.965796	1	0.0348026	1	Prupe.1G346500
GO:0005666	CC	RNA polymerase III complex	0.968545	1	0.0319604	1	Prupe.2G047700
GO:0010287	CC	plastoglobule	0.973551	1	0.0268051	1	Prupe.3G174600
GO:0005762	CC	mitochondrial large ribosomal subunit	0.978348	1	0.0218896	1	Prupe.6G102500
GO:0005686	CC	U2 snRNP	0.981538	1	0.0186347	1	Prupe.1G203900
GO:0071011	CC	precatalytic spliceosome	0.988547	1	0.0115194	1	Prupe.1G203900
GO:0000151	CC	ubiquitin ligase complex	0.990271	1	0.0097771	1	Prupe.6G115700
GO:0009522	CC	photosystem I	0.990701	1	0.00934296	1	Prupe.3G174600
GO:0046540	CC	U4/U6 x U5 tri-snRNP complex	0.990797	1	0.00924525	1	Prupe.6G164200
GO:0070469	CC	respirasome	0.991161	1	0.00887787	1	Prupe.8G028000
GO:0000502	CC	proteasome complex	0.993515	1	0.00650602	1	Prupe.3G183900
GO:0009706	CC	chloroplast inner membrane	0.993815	1	0.0062039	1	Prupe.3G261900
GO:0030176	CC	integral component of endoplasmic reticulum membrane	0.993967	1	0.0060513	1	Prupe.2G273500
GO:0019005	CC	SCF ubiquitin ligase complex	0.997107	1	0.00289692	1	Prupe.3G200200
GO:0016592	CC	mediator complex	0.998447	1	0.00155401	1	Prupe.1G181600
GO:0009523	CC	photosystem II	0.999388	1	0.000612465	1	Prupe.3G174600
GO:0005681	CC	spliceosomal complex	0.999971	1	2.94982e-05	1	Prupe.6G164200
GO:0003677	MF	DNA binding	0.999291	1	0.000709356	146	Prupe.1G039200, Prupe.1G084900, Prupe.1G114800, Prupe.1G125300, Prupe.1G150700, Prupe.1G169000, Prupe.1G269200, Prupe.1G274700, Prupe.1G284900, Prupe.1G304700, Prupe.1G313300, Prupe.1G330600, Prupe.1G350700, Prupe.1G371300, Prupe.1G371500, Prupe.1G378000, Prupe.1G378200, Prupe.1G378800, Prupe.1G393000, Prupe.1G393100, Prupe.1G407500, Prupe.1G433500, Prupe.1G437900, Prupe.1G480400, Prupe.1G517200,…
GO:0022857	MF	transmembrane transporter activity	0.781526	1	0.246507	44	Prupe.1G045600, Prupe.1G156300, Prupe.1G157000, Prupe.1G249000, Prupe.1G257200, Prupe.1G257300, Prupe.1G257500, Prupe.1G421500, Prupe.1G490100, Prupe.1G490200, Prupe.1G500400, Prupe.1G500600, Prupe.1G524800, Prupe.2G024100, Prupe.2G110400, Prupe.2G241800, Prupe.2G260700, Prupe.2G274200, Prupe.2G299200, Prupe.3G071100, Prupe.3G077900, Prupe.3G281000, Prupe.4G042700, Prupe.4G083700, Prupe.4G244400,…
GO:0008270	MF	zinc ion binding	1	1	3.37193e-08	44	Prupe.1G216000, Prupe.1G227400, Prupe.1G318400, Prupe.1G356700, Prupe.1G447400, Prupe.1G457200, Prupe.1G457300, Prupe.1G539400, Prupe.2G064600, Prupe.2G085600, Prupe.2G140000, Prupe.2G178500, Prupe.2G212900, Prupe.3G044500, Prupe.3G060900, Prupe.3G194000, Prupe.3G284400, Prupe.3G284600, Prupe.3G284800, Prupe.4G240300, Prupe.4G263400, Prupe.5G122400, Prupe.5G134100, Prupe.5G195800, Prupe.6G080400,…
GO:0003676	MF	nucleic acid binding	1	1	-2.61331e-11	41	Prupe.1G164900, Prupe.1G260700, Prupe.1G338700, Prupe.1G368500, Prupe.1G422500, Prupe.1G476800, Prupe.1G503600, Prupe.1G519200, Prupe.2G022700, Prupe.2G048800, Prupe.2G078300, Prupe.2G080400, Prupe.2G197200, Prupe.2G205700, Prupe.2G219600, Prupe.3G009200, Prupe.3G045600, Prupe.3G056300, Prupe.3G063400, Prupe.3G128100, Prupe.3G288900, Prupe.4G174500, Prupe.4G179100, Prupe.4G255100, Prupe.5G044600,…
GO:0003723	MF	RNA binding	1	1	0	37	Prupe.1G132100, Prupe.1G201900, Prupe.1G202500, Prupe.1G275400, Prupe.1G368500, Prupe.1G422500, Prupe.1G476800, Prupe.1G519200, Prupe.2G078200, Prupe.2G078300, Prupe.2G080400, Prupe.2G157900, Prupe.2G164500, Prupe.2G197200, Prupe.2G219600, Prupe.3G042800, Prupe.3G056300, Prupe.3G213200, Prupe.3G310400, Prupe.4G219300, Prupe.4G219500, Prupe.4G255100, Prupe.4G264500, Prupe.5G003100, Prupe.5G059500,…
GO:0005525	MF	GTP binding	0.98405	1	0.0160785	18	Prupe.1G109200, Prupe.1G333900, Prupe.1G572400, Prupe.2G040000, Prupe.2G188500, Prupe.3G049700, Prupe.3G126400, Prupe.3G269300, Prupe.4G106500, Prupe.4G106600, Prupe.4G106700, Prupe.4G106900, Prupe.4G180200, Prupe.5G099500, Prupe.6G212700, Prupe.7G015100, Prupe.7G226500, Prupe.8G050200
GO:0000981	MF	DNA-binding transcription factor activity, RNA polymerase II-specific	0.991803	1	0.00823041	18	Prupe.1G371300, Prupe.1G523000, Prupe.1G524500, Prupe.1G538700, Prupe.2G127300, Prupe.2G194400, Prupe.2G198800, Prupe.3G015300, Prupe.3G197300, Prupe.3G307800, Prupe.5G175200, Prupe.5G208400, Prupe.7G030800, Prupe.7G039800, Prupe.7G039900, Prupe.7G040100, Prupe.7G191100, Prupe.8G256000
GO:0003924	MF	GTPase activity	0.849673	1	0.162904	16	Prupe.1G333900, Prupe.2G040000, Prupe.2G188500, Prupe.3G049700, Prupe.3G126400, Prupe.3G269300, Prupe.4G106500, Prupe.4G106600, Prupe.4G106700, Prupe.4G106900, Prupe.4G180200, Prupe.5G099500, Prupe.6G212700, Prupe.7G015100, Prupe.7G226500, Prupe.8G050200
GO:0000978	MF	RNA polymerase II cis-regulatory region sequence-specific DNA binding	0.99657	1	0.00343554	14	Prupe.1G371300, Prupe.1G433500, Prupe.1G524500, Prupe.1G538700, Prupe.2G198800, Prupe.3G197300, Prupe.3G307800, Prupe.5G208400, Prupe.7G030800, Prupe.7G056700, Prupe.7G133600, Prupe.7G191100, Prupe.7G206900, Prupe.8G256000
GO:0003735	MF	structural constituent of ribosome	1	1	2.1093e-10	14	Prupe.1G192700, Prupe.1G210800, Prupe.1G545600, Prupe.2G047200, Prupe.2G157900, Prupe.3G023200, Prupe.3G042800, Prupe.4G015300, Prupe.4G264500, Prupe.5G059500, Prupe.5G221500, Prupe.6G034300, Prupe.6G102500, Prupe.6G133500
GO:0004842	MF	ubiquitin-protein transferase activity	0.981374	1	0.0188021	12	Prupe.1G336200, Prupe.1G360300, Prupe.1G364600, Prupe.2G253400, Prupe.3G164200, Prupe.5G175800, Prupe.6G014500, Prupe.6G115700, Prupe.6G145200, Prupe.6G202800, Prupe.7G094000, Prupe.8G024500
GO:0008234	MF	cysteine-type peptidase activity	0.985378	1	0.0147296	12	Prupe.1G183700, Prupe.1G201000, Prupe.3G106000, Prupe.3G120900, Prupe.4G092400, Prupe.4G261000, Prupe.4G261200, Prupe.5G062900, Prupe.5G238300, Prupe.7G026800, Prupe.8G131600, Prupe.8G181100
GO:0061630	MF	ubiquitin protein ligase activity	0.987762	1	0.0123136	12	Prupe.1G319200, Prupe.1G501100, Prupe.2G085600, Prupe.2G319300, Prupe.4G119200, Prupe.5G122400, Prupe.5G134100, Prupe.5G140900, Prupe.6G115700, Prupe.7G220800, Prupe.8G015800, Prupe.8G106100
GO:0015297	MF	antiporter activity	0.914117	1	0.0897967	10	Prupe.1G524800, Prupe.2G299200, Prupe.3G192400, Prupe.5G084500, Prupe.6G103500, Prupe.7G026300, Prupe.7G054100, Prupe.7G218600, Prupe.7G247800, Prupe.8G067800
GO:0003729	MF	mRNA binding	0.999994	1	5.73302e-06	10	Prupe.1G422200, Prupe.1G519200, Prupe.2G047200, Prupe.2G197200, Prupe.3G080000, Prupe.3G149200, Prupe.4G086300, Prupe.4G189300, Prupe.6G135600, Prupe.8G042700
GO:0046982	MF	protein heterodimerization activity	0.809664	1	0.211135	9	Prupe.1G169000, Prupe.2G232200, Prupe.3G197300, Prupe.4G054300, Prupe.6G021100, Prupe.6G021700, Prupe.7G028400, Prupe.8G250000, Prupe.8G256000
GO:0016791	MF	phosphatase activity	0.993433	1	0.00658863	9	Prupe.1G041200, Prupe.1G246400, Prupe.1G264300, Prupe.1G413800, Prupe.3G051900, Prupe.4G068500, Prupe.6G049100, Prupe.6G224900, Prupe.6G272900
GO:0004650	MF	polygalacturonase activity	0.936677	1	0.0654167	8	Prupe.1G110100, Prupe.1G251200, Prupe.2G175100, Prupe.3G005900, Prupe.4G116400, Prupe.4G261900, Prupe.5G105400, Prupe.6G202500
GO:0004523	MF	RNA-DNA hybrid ribonuclease activity	0.985267	1	0.0148422	8	Prupe.2G022700, Prupe.2G048800, Prupe.3G063400, Prupe.4G174500, Prupe.5G044600, Prupe.6G123500, Prupe.6G141500, Prupe.8G042700
GO:0015035	MF	protein disulfide oxidoreductase activity	0.90614	1	0.0985619	7	Prupe.1G140500, Prupe.1G410500, Prupe.2G073600, Prupe.2G094300, Prupe.7G092000, Prupe.7G109100, Prupe.8G254300
GO:0016853	MF	isomerase activity	0.999428	1	0.000572489	7	Prupe.1G512500, Prupe.3G026200, Prupe.3G026400, Prupe.3G026700, Prupe.3G026800, Prupe.3G249900, Prupe.6G076300
GO:0004721	MF	phosphoprotein phosphatase activity	0.984776	1	0.0153408	6	Prupe.1G246400, Prupe.4G068500, Prupe.5G202500, Prupe.6G049100, Prupe.6G224900, Prupe.7G119400
GO:0003682	MF	chromatin binding	0.919817	1	0.0835801	5	Prupe.2G007300, Prupe.3G034000, Prupe.3G196400, Prupe.6G011600, Prupe.6G167600
GO:0051287	MF	NAD binding	0.924477	1	0.0785268	5	Prupe.1G233400, Prupe.2G150200, Prupe.3G197000, Prupe.3G296200, Prupe.7G053500
GO:0004518	MF	nuclease activity	0.933669	1	0.0686333	5	Prupe.1G275400, Prupe.6G139300, Prupe.6G139800, Prupe.6G141200, Prupe.8G202000
GO:0051539	MF	4 iron, 4 sulfur cluster binding	0.981523	1	0.0186499	5	Prupe.1G141500, Prupe.3G061300, Prupe.3G311300, Prupe.5G013700, Prupe.6G008100
GO:0004722	MF	protein serine/threonine phosphatase activity	0.997394	1	0.00260927	5	Prupe.1G041200, Prupe.1G246400, Prupe.5G202500, Prupe.6G049100, Prupe.6G224900
GO:0008080	MF	N-acetyltransferase activity	0.77976	1	0.24877	4	Prupe.1G016700, Prupe.3G098400, Prupe.6G055100, Prupe.6G297300
GO:0061631	MF	ubiquitin conjugating enzyme activity	0.884894	1	0.122288	4	Prupe.1G008300, Prupe.4G256900, Prupe.5G033600, Prupe.6G047000
GO:0000149	MF	SNARE binding	0.901167	1	0.104065	4	Prupe.1G524700, Prupe.2G173700, Prupe.7G000700, Prupe.7G093400
GO:0016779	MF	nucleotidyltransferase activity	0.929975	1	0.0725973	4	Prupe.1G023000, Prupe.1G132100, Prupe.7G270900, Prupe.8G093400
GO:0042910	MF	xenobiotic transmembrane transporter activity	0.953773	1	0.0473293	4	Prupe.1G524800, Prupe.2G299200, Prupe.7G026300, Prupe.7G218600
GO:0051536	MF	iron-sulfur cluster binding	0.997112	1	0.00289181	4	Prupe.1G397200, Prupe.3G018700, Prupe.6G008100, Prupe.8G215200
GO:0043130	MF	ubiquitin binding	0.860637	1	0.150083	3	Prupe.1G281000, Prupe.8G103200, Prupe.8G103300
GO:0043169	MF	cation binding	0.866334	1	0.143484	3	Prupe.1G246400, Prupe.1G435600, Prupe.6G224900
GO:0051087	MF	chaperone binding	0.889434	1	0.11717	3	Prupe.1G493700, Prupe.4G087300, Prupe.6G053300
GO:0015299	MF	solute:proton antiporter activity	0.903326	1	0.101672	3	Prupe.1G346300, Prupe.2G257000, Prupe.4G283500
GO:0004812	MF	aminoacyl-tRNA ligase activity	0.93452	1	0.0677223	3	Prupe.5G096900, Prupe.8G045400, Prupe.8G192100
GO:0008237	MF	metallopeptidase activity	0.980578	1	0.0196127	3	Prupe.1G457200, Prupe.1G457300, Prupe.3G044500
GO:0004197	MF	cysteine-type endopeptidase activity	0.995387	1	0.00462377	3	Prupe.2G052800, Prupe.8G131600, Prupe.8G181100
GO:0003712	MF	transcription coregulator activity	0.996795	1	0.00320992	3	Prupe.1G181600, Prupe.1G481300, Prupe.6G027400
GO:0003690	MF	double-stranded DNA binding	0.998571	1	0.00143027	3	Prupe.1G005900, Prupe.1G330600, Prupe.2G040300
GO:0016874	MF	ligase activity	0.998748	1	0.001253	3	Prupe.5G096900, Prupe.5G099600, Prupe.8G045400
GO:0003680	MF	AT DNA binding	0.783542	1	0.243931	2	Prupe.2G147000, Prupe.6G348200
GO:0005385	MF	zinc ion transmembrane transporter activity	0.788312	1	0.237861	2	Prupe.1G078700, Prupe.4G117100
GO:0004683	MF	calmodulin-dependent protein kinase activity	0.81391	1	0.205905	2	Prupe.6G062500, Prupe.7G090800
GO:0001228	MF	DNA-binding transcription activator activity, RNA polymerase II-specific	0.899824	1	0.105556	2	Prupe.3G197300, Prupe.8G256000
GO:0004175	MF	endopeptidase activity	0.909655	1	0.09469	2	Prupe.1G357500, Prupe.3G183900
GO:0046873	MF	metal ion transmembrane transporter activity	0.95232	1	0.0488545	2	Prupe.1G492500, Prupe.4G117100
GO:0004519	MF	endonuclease activity	0.958335	1	0.0425581	2	Prupe.1G275400, Prupe.8G202000
GO:0005347	MF	ATP transmembrane transporter activity	0.964588	1	0.0360546	2	Prupe.4G244400, Prupe.8G067800
GO:0042803	MF	protein homodimerization activity	0.970417	1	0.0300298	2	Prupe.1G378200, Prupe.3G296200
GO:0052689	MF	carboxylic ester hydrolase activity	0.978705	1	0.021525	2	Prupe.3G185700, Prupe.5G069600
GO:0003899	MF	DNA-directed 5'-3' RNA polymerase activity	0.994825	1	0.00518793	2	Prupe.2G047700, Prupe.8G132400
GO:0003697	MF	single-stranded DNA binding	0.995975	1	0.00403276	2	Prupe.6G241500, Prupe.8G031700
GO:0003689	MF	DNA clamp loader activity	0.791119	1	0.234307	1	Prupe.4G268900
GO:0008083	MF	growth factor activity	0.79178	1	0.233471	1	Prupe.1G420000
GO:0047262	MF	polygalacturonate 4-alpha-galacturonosyltransferase activity	0.794833	1	0.229623	1	Prupe.4G201700
GO:0031490	MF	chromatin DNA binding	0.795776	1	0.228438	1	Prupe.6G027400
GO:0097027	MF	ubiquitin-protein transferase activator activity	0.804929	1	0.217001	1	Prupe.4G247700
GO:0015079	MF	potassium ion transmembrane transporter activity	0.815813	1	0.203571	1	Prupe.5G236500
GO:0010997	MF	anaphase-promoting complex binding	0.827145	1	0.189776	1	Prupe.4G247700
GO:0005545	MF	1-phosphatidylinositol binding	0.833742	1	0.181831	1	Prupe.1G524700
GO:0005546	MF	phosphatidylinositol-4,5-bisphosphate binding	0.842994	1	0.170796	1	Prupe.1G524700
GO:0008198	MF	ferrous iron binding	0.849541	1	0.163059	1	Prupe.6G050900
GO:0005381	MF	iron ion transmembrane transporter activity	0.849968	1	0.162557	1	Prupe.8G027700
GO:0016618	MF	hydroxypyruvate reductase activity	0.862591	1	0.147815	1	Prupe.2G150200
GO:0070042	MF	rRNA (uridine-N3-)-methyltransferase activity	0.8626	1	0.147805	1	Prupe.3G193200
GO:0030267	MF	glyoxylate reductase (NADP) activity	0.879383	1	0.128535	1	Prupe.2G150200
GO:0004693	MF	cyclin-dependent protein serine/threonine kinase activity	0.881706	1	0.125896	1	Prupe.5G003700
GO:0070181	MF	small ribosomal subunit rRNA binding	0.886139	1	0.120881	1	Prupe.6G133500
GO:0004575	MF	sucrose alpha-glucosidase activity	0.887262	1	0.119614	1	Prupe.2G277900
GO:0047617	MF	acyl-CoA hydrolase activity	0.887559	1	0.11928	1	Prupe.2G157800
GO:0009982	MF	pseudouridine synthase activity	0.901524	1	0.103668	1	Prupe.2G157900
GO:0016209	MF	antioxidant activity	0.901627	1	0.103554	1	Prupe.6G112800
GO:0050897	MF	cobalt ion binding	0.904804	1	0.100037	1	Prupe.1G539400
GO:0046961	MF	proton-transporting ATPase activity, rotational mechanism	0.907151	1	0.0974467	1	Prupe.6G005500
GO:0004564	MF	beta-fructofuranosidase activity	0.917308	1	0.0863117	1	Prupe.2G277900
GO:0005315	MF	inorganic phosphate transmembrane transporter activity	0.918408	1	0.0851132	1	Prupe.8G180300
GO:0019888	MF	protein phosphatase regulator activity	0.919182	1	0.084271	1	Prupe.8G169200
GO:0009927	MF	histidine phosphotransfer kinase activity	0.919208	1	0.0842428	1	Prupe.6G123100
GO:0008374	MF	O-acyltransferase activity	0.920283	1	0.0830743	1	Prupe.4G227300
GO:0008081	MF	phosphoric diester hydrolase activity	0.920694	1	0.0826274	1	Prupe.2G055700
GO:0003684	MF	damaged DNA binding	0.923324	1	0.0797753	1	Prupe.5G205700
GO:0015078	MF	proton transmembrane transporter activity	0.925554	1	0.077363	1	Prupe.3G052200
GO:0008097	MF	5S rRNA binding	0.928157	1	0.0745549	1	Prupe.1G192700
GO:0004521	MF	endoribonuclease activity	0.930743	1	0.0717719	1	Prupe.1G275400
GO:0043424	MF	protein histidine kinase binding	0.932685	1	0.0696874	1	Prupe.6G123100
GO:0031593	MF	polyubiquitin modification-dependent protein binding	0.933843	1	0.0684469	1	Prupe.4G237600
GO:0004713	MF	protein tyrosine kinase activity	0.934344	1	0.0679104	1	Prupe.3G054500
GO:0004869	MF	cysteine-type endopeptidase inhibitor activity	0.939883	1	0.0620002	1	Prupe.1G014700
GO:0051119	MF	sugar transmembrane transporter activity	0.941083	1	0.0607244	1	Prupe.8G017400
GO:0016773	MF	phosphotransferase activity, alcohol group as acceptor	0.943961	1	0.0576702	1	Prupe.6G212100
GO:0030276	MF	clathrin binding	0.949729	1	0.0515786	1	Prupe.2G235100
GO:0009931	MF	calcium-dependent protein serine/threonine kinase activity	0.950711	1	0.0505451	1	Prupe.7G090800
GO:0004298	MF	threonine-type endopeptidase activity	0.951623	1	0.049586	1	Prupe.3G183900
GO:0016168	MF	chlorophyll binding	0.9553	1	0.0457294	1	Prupe.3G174600
GO:0003678	MF	DNA helicase activity	0.958875	1	0.041995	1	Prupe.6G241500
GO:0008324	MF	cation transmembrane transporter activity	0.961114	1	0.0396624	1	Prupe.3G192400
GO:0004724	MF	magnesium-dependent protein serine/threonine phosphatase activity	0.966362	1	0.0342169	1	Prupe.1G246400
GO:0031624	MF	ubiquitin conjugating enzyme binding	0.967914	1	0.0326122	1	Prupe.6G115700
GO:0005198	MF	structural molecule activity	0.974393	1	0.0259408	1	Prupe.3G155800
GO:0016717	MF	oxidoreductase activity, acting on paired donors, with oxidation of a pair of donors resulting in the reduction of molecular oxygen to two molecules of water	0.977033	1	0.0232348	1	Prupe.6G055900
GO:0005096	MF	GTPase activator activity	0.984237	1	0.0158886	1	Prupe.1G466000
GO:0042802	MF	identical protein binding	0.98867	1	0.0113951	1	Prupe.3G094600
GO:0051537	MF	2 iron, 2 sulfur cluster binding	0.989995	1	0.0100551	1	Prupe.1G397200
GO:0042393	MF	histone binding	0.992127	1	0.00790431	1	Prupe.1G320600
GO:0004843	MF	thiol-dependent ubiquitin-specific protease activity	0.997601	1	0.00240138	1	Prupe.2G052800
GO:0003743	MF	translation initiation factor activity	0.999398	1	0.000601921	1	Prupe.3G045600
GO:0004222	MF	metalloendopeptidase activity	0.999663	1	0.00033681	1	Prupe.8G122200
GO:0015238	#N/A	#N/A	0.948675	1	0.052689	4	Prupe.1G524800, Prupe.2G299200, Prupe.7G026300, Prupe.7G218600
GO:0106306	#N/A	#N/A	0.979957	1	0.0202466	4	Prupe.1G246400, Prupe.5G202500, Prupe.6G049100, Prupe.6G224900
GO:0106307	#N/A	#N/A	0.979957	1	0.0202466	4	Prupe.1G246400, Prupe.5G202500, Prupe.6G049100, Prupe.6G224900
GO:0044212	#N/A	#N/A	0.792018	1	0.233172	1	Prupe.3G143800
GO:0015991	#N/A	#N/A	0.910193	1	0.094099	1	Prupe.6G005500

## Sheet: CNR_vs_CRR
		Supplementary Table S6. Summary for the gene ontology (GO) enrichment analysis of differentially expressed genes (DEGs).
ID	Ontology	Description	pvalue	p_adj	-log10(P-value)	Count	Gene.ID
GO:0043531	MF	ADP binding	4.43645e-29	3.99724e-26	65.2851	76	Prupe.1G018600, Prupe.1G018700, Prupe.1G051500, Prupe.1G162100, Prupe.1G162200, Prupe.1G162500, Prupe.1G163700, Prupe.1G163800, Prupe.1G528900, Prupe.1G529000, Prupe.1G541300, Prupe.1G542800, Prupe.1G545200, Prupe.1G545300, Prupe.2G011400, Prupe.2G025200, Prupe.2G043000, Prupe.2G046300, Prupe.2G053900, Prupe.2G057100, Prupe.2G057600, Prupe.2G057800, Prupe.2G067600, Prupe.2G069000, Prupe.2G113100,…
GO:0006952	BP	defense response	1.48007e-15	3.33385e-13	34.1467	60	Prupe.1G018600, Prupe.1G018700, Prupe.1G051500, Prupe.1G162500, Prupe.1G163700, Prupe.1G163800, Prupe.1G204000, Prupe.1G205600, Prupe.1G327300, Prupe.1G327500, Prupe.1G327700, Prupe.1G328200, Prupe.1G328600, Prupe.1G329000, Prupe.1G341500, Prupe.1G341600, Prupe.1G528900, Prupe.1G529000, Prupe.1G545200, Prupe.1G545300, Prupe.2G011400, Prupe.2G057100, Prupe.2G057600, Prupe.2G057800, Prupe.2G069000,…
GO:0050135	MF	NAD(P)+ nucleosidase activity	1.24531e-15	3.33385e-13	34.3194	31	Prupe.1G018600, Prupe.1G018700, Prupe.1G162200, Prupe.1G162500, Prupe.2G057100, Prupe.2G057600, Prupe.2G057800, Prupe.2G069000, Prupe.2G113100, Prupe.3G010100, Prupe.6G132100, Prupe.6G160100, Prupe.8G005100, Prupe.8G005200, Prupe.8G021700, Prupe.8G023600, Prupe.8G023900, Prupe.8G026700, Prupe.8G027300, Prupe.8G031800, Prupe.8G041000, Prupe.8G044300, Prupe.8G046500, Prupe.8G046700, Prupe.8G056600,…
GO:0061809	MF	NAD+ nucleotidase, cyclic ADP-ribose generating	1.24531e-15	3.33385e-13	34.3194	31	Prupe.1G018600, Prupe.1G018700, Prupe.1G162200, Prupe.1G162500, Prupe.2G057100, Prupe.2G057600, Prupe.2G057800, Prupe.2G069000, Prupe.2G113100, Prupe.3G010100, Prupe.6G132100, Prupe.6G160100, Prupe.8G005100, Prupe.8G005200, Prupe.8G021700, Prupe.8G023600, Prupe.8G023900, Prupe.8G026700, Prupe.8G027300, Prupe.8G031800, Prupe.8G041000, Prupe.8G044300, Prupe.8G046500, Prupe.8G046700, Prupe.8G056600,…
GO:0007165	BP	signal transduction	3.69603e-10	6.66025e-08	21.7186	39	Prupe.1G018600, Prupe.1G018700, Prupe.1G134400, Prupe.1G161400, Prupe.1G162200, Prupe.1G162500, Prupe.1G440600, Prupe.2G057100, Prupe.2G057600, Prupe.2G057800, Prupe.2G068400, Prupe.2G069000, Prupe.2G113100, Prupe.3G010100, Prupe.6G132100, Prupe.6G132200, Prupe.6G160100, Prupe.6G217500, Prupe.8G005100, Prupe.8G005200, Prupe.8G021700, Prupe.8G023600, Prupe.8G023900, Prupe.8G026700, Prupe.8G027300,…
GO:0055114	BP	oxidation-reduction process	1.60921e-07	2.4165e-05	15.6424	129	Prupe.1G035500, Prupe.1G063200, Prupe.1G171200, Prupe.1G230200, Prupe.1G230900, Prupe.1G231000, Prupe.1G231300, Prupe.1G242300, Prupe.1G244700, Prupe.1G291100, Prupe.1G386900, Prupe.1G387200, Prupe.1G387500, Prupe.1G397100, Prupe.1G397200, Prupe.1G410000, Prupe.1G410500, Prupe.1G417300, Prupe.1G428400, Prupe.1G428700, Prupe.1G449200, Prupe.1G449300, Prupe.1G458800, Prupe.1G468300, Prupe.1G502300,…
GO:0004674	MF	protein serine/threonine kinase activity	3.81124e-07	4.90561e-05	14.7801	62	Prupe.1G168400, Prupe.1G201100, Prupe.1G205100, Prupe.1G244900, Prupe.1G439100, Prupe.1G459200, Prupe.1G469100, Prupe.1G505700, Prupe.1G510800, Prupe.2G048700, Prupe.2G088400, Prupe.2G093000, Prupe.2G116200, Prupe.2G116300, Prupe.3G055100, Prupe.3G055400, Prupe.3G055900, Prupe.3G058200, Prupe.3G145600, Prupe.3G152600, Prupe.3G181800, Prupe.3G226200, Prupe.3G226500, Prupe.3G226700, Prupe.4G031700,…
GO:0016491	MF	oxidoreductase activity	2.36813e-06	0.000266711	12.9534	99	Prupe.1G035500, Prupe.1G171200, Prupe.1G230200, Prupe.1G230900, Prupe.1G231000, Prupe.1G231300, Prupe.1G242300, Prupe.1G244700, Prupe.1G291100, Prupe.1G386900, Prupe.1G387200, Prupe.1G387500, Prupe.1G410000, Prupe.1G417300, Prupe.1G428700, Prupe.1G458800, Prupe.1G468300, Prupe.1G502300, Prupe.1G502500, Prupe.1G534600, Prupe.1G535600, Prupe.1G538000, Prupe.1G548600, Prupe.1G548800, Prupe.2G005500,…
GO:0006468	BP	protein phosphorylation	4.59508e-06	0.000460019	12.2905	88	Prupe.1G157800, Prupe.1G168400, Prupe.1G201100, Prupe.1G205100, Prupe.1G244900, Prupe.1G315100, Prupe.1G439100, Prupe.1G459200, Prupe.1G469100, Prupe.1G505700, Prupe.1G510800, Prupe.1G515600, Prupe.1G515700, Prupe.1G515800, Prupe.2G047500, Prupe.2G048700, Prupe.2G088200, Prupe.2G088400, Prupe.2G088800, Prupe.2G092800, Prupe.2G093000, Prupe.2G093300, Prupe.2G103400, Prupe.2G116200, Prupe.2G116300,…
GO:0004672	MF	protein kinase activity	7.04179e-06	0.000609221	11.8636	85	Prupe.1G157800, Prupe.1G168400, Prupe.1G201100, Prupe.1G205100, Prupe.1G315100, Prupe.1G439100, Prupe.1G459200, Prupe.1G469100, Prupe.1G505700, Prupe.1G510800, Prupe.1G515600, Prupe.1G515700, Prupe.1G515800, Prupe.2G047500, Prupe.2G048700, Prupe.2G088200, Prupe.2G088400, Prupe.2G088800, Prupe.2G092800, Prupe.2G093000, Prupe.2G093300, Prupe.2G103400, Prupe.2G116200, Prupe.2G116300, Prupe.3G025400,…
GO:0020037	MF	heme binding	7.43777e-06	0.000609221	11.8089	45	Prupe.1G230200, Prupe.1G230900, Prupe.1G231000, Prupe.1G231300, Prupe.1G242300, Prupe.1G291100, Prupe.1G386900, Prupe.1G387200, Prupe.1G387500, Prupe.1G410000, Prupe.1G428400, Prupe.1G428700, Prupe.1G534600, Prupe.1G538000, Prupe.2G148400, Prupe.2G320000, Prupe.3G237800, Prupe.4G153000, Prupe.4G199800, Prupe.4G235600, Prupe.4G238200, Prupe.4G238300, Prupe.4G276800, Prupe.5G077700, Prupe.5G078100,…
GO:0010333	MF	terpene synthase activity	8.92849e-06	0.000670381	11.6263	11	Prupe.4G030300, Prupe.4G125300, Prupe.4G125500, Prupe.4G197900, Prupe.4G198000, Prupe.4G198600, Prupe.4G198700, Prupe.4G199000, Prupe.4G199300, Prupe.4G238400, Prupe.4G238800
GO:0016758	MF	transferase activity, transferring hexosyl groups	1.65566e-05	0.00113267	11.0087	28	Prupe.1G053300, Prupe.1G179000, Prupe.1G179400, Prupe.1G458200, Prupe.1G519500, Prupe.1G520100, Prupe.2G085300, Prupe.2G117600, Prupe.3G184400, Prupe.3G184700, Prupe.3G189100, Prupe.3G189300, Prupe.3G256000, Prupe.3G282700, Prupe.6G007700, Prupe.6G008600, Prupe.6G008700, Prupe.6G049600, Prupe.6G049700, Prupe.6G050100, Prupe.6G190600, Prupe.6G203800, Prupe.6G203900, Prupe.6G211600, Prupe.6G233500,…
GO:0008194	MF	UDP-glycosyltransferase activity	1.75997e-05	0.00113267	10.9476	27	Prupe.1G053300, Prupe.1G179000, Prupe.1G179400, Prupe.1G458200, Prupe.1G519500, Prupe.1G520100, Prupe.2G085300, Prupe.3G184400, Prupe.3G184700, Prupe.3G189100, Prupe.3G189300, Prupe.3G256000, Prupe.3G282700, Prupe.6G007700, Prupe.6G008600, Prupe.6G008700, Prupe.6G049600, Prupe.6G049700, Prupe.6G050100, Prupe.6G190600, Prupe.6G203800, Prupe.6G203900, Prupe.6G211600, Prupe.6G233500, Prupe.6G266900,…
GO:0004497	MF	monooxygenase activity	3.83863e-05	0.00230574	10.1678	32	Prupe.1G230200, Prupe.1G230900, Prupe.1G231000, Prupe.1G231300, Prupe.1G242300, Prupe.1G291100, Prupe.1G386900, Prupe.1G387200, Prupe.1G387500, Prupe.1G410000, Prupe.1G428700, Prupe.1G534600, Prupe.1G538000, Prupe.2G148400, Prupe.3G157200, Prupe.3G237800, Prupe.4G153000, Prupe.4G235600, Prupe.4G238200, Prupe.5G078100, Prupe.5G078300, Prupe.5G078400, Prupe.5G078800, Prupe.6G007200, Prupe.6G038000,…
GO:0016021	CC	integral component of membrane	5.83103e-05	0.0032836	9.74973	362	Prupe.1G058700, Prupe.1G063200, Prupe.1G090700, Prupe.1G142300, Prupe.1G150700, Prupe.1G164300, Prupe.1G168400, Prupe.1G178700, Prupe.1G192200, Prupe.1G201100, Prupe.1G203500, Prupe.1G209400, Prupe.1G225100, Prupe.1G225700, Prupe.1G230900, Prupe.1G242300, Prupe.1G255400, Prupe.1G255600, Prupe.1G257500, Prupe.1G273700, Prupe.1G274000, Prupe.1G278800, Prupe.1G286600, Prupe.1G287400, Prupe.1G291100,…
GO:0019740	BP	nitrogen utilization	0.000103049	0.00546157	9.18031	5	Prupe.4G284200, Prupe.4G284700, Prupe.4G285000, Prupe.4G285300, Prupe.4G285400
GO:0016705	MF	oxidoreductase activity, acting on paired donors, with incorporation or reduction of molecular oxygen	0.000119667	0.00599002	9.03079	34	Prupe.1G230200, Prupe.1G230900, Prupe.1G231000, Prupe.1G231300, Prupe.1G242300, Prupe.1G291100, Prupe.1G386900, Prupe.1G387200, Prupe.1G387500, Prupe.1G410000, Prupe.1G428400, Prupe.1G428700, Prupe.1G534600, Prupe.1G538000, Prupe.2G148400, Prupe.3G237800, Prupe.4G153000, Prupe.4G199800, Prupe.4G235600, Prupe.4G238200, Prupe.4G238300, Prupe.5G077700, Prupe.5G078100, Prupe.5G078300, Prupe.5G078400,…
GO:0008171	MF	O-methyltransferase activity	0.000253472	0.0120199	8.28026	10	Prupe.1G227100, Prupe.2G107200, Prupe.3G119100, Prupe.3G119800, Prupe.3G120400, Prupe.3G129200, Prupe.3G129400, Prupe.3G129800, Prupe.3G235500, Prupe.8G171100
GO:0005506	MF	iron ion binding	0.000508096	0.0228897	7.58484	35	Prupe.1G230200, Prupe.1G230900, Prupe.1G231000, Prupe.1G231300, Prupe.1G242300, Prupe.1G291100, Prupe.1G386900, Prupe.1G387200, Prupe.1G387500, Prupe.1G410000, Prupe.1G428400, Prupe.1G428700, Prupe.1G534600, Prupe.1G538000, Prupe.2G148400, Prupe.3G237800, Prupe.4G153000, Prupe.4G199800, Prupe.4G235600, Prupe.4G238200, Prupe.4G238300, Prupe.5G077700, Prupe.5G078100, Prupe.5G078300, Prupe.5G078400,…
GO:0016020	CC	membrane	0.000558283	0.023953	7.49064	379	Prupe.1G058700, Prupe.1G063200, Prupe.1G090700, Prupe.1G142300, Prupe.1G150700, Prupe.1G164300, Prupe.1G166100, Prupe.1G168400, Prupe.1G178700, Prupe.1G192200, Prupe.1G201100, Prupe.1G203500, Prupe.1G209400, Prupe.1G225100, Prupe.1G225700, Prupe.1G230900, Prupe.1G242300, Prupe.1G255400, Prupe.1G255600, Prupe.1G257500, Prupe.1G273700, Prupe.1G274000, Prupe.1G278800, Prupe.1G286600, Prupe.1G287400,…
GO:0019438	BP	aromatic compound biosynthetic process	0.000855665	0.0350434	7.06363	8	Prupe.3G119100, Prupe.3G119800, Prupe.3G120400, Prupe.3G129200, Prupe.3G129400, Prupe.3G129800, Prupe.3G235500, Prupe.8G171100
GO:2000031	BP	regulation of salicylic acid mediated signaling pathway	0.00113752	0.0368399	6.77891	7	Prupe.3G135100, Prupe.4G144900, Prupe.4G202700, Prupe.4G202900, Prupe.4G203500, Prupe.7G182400, Prupe.8G110300
GO:0015696	BP	ammonium transport	0.00112057	0.0368399	6.79392	5	Prupe.4G284200, Prupe.4G284700, Prupe.4G285000, Prupe.4G285300, Prupe.4G285400
GO:0072488	BP	ammonium transmembrane transport	0.00112057	0.0368399	6.79392	5	Prupe.4G284200, Prupe.4G284700, Prupe.4G285000, Prupe.4G285300, Prupe.4G285400
GO:0000390	BP	spliceosomal complex disassembly	0.00118575	0.0368399	6.73738	4	Prupe.1G368500, Prupe.1G422500, Prupe.2G078200, Prupe.2G078300
GO:0008519	MF	ammonium transmembrane transporter activity	0.00112057	0.0368399	6.79392	5	Prupe.4G284200, Prupe.4G284700, Prupe.4G285000, Prupe.4G285300, Prupe.4G285400
GO:0106310	#N/A	#N/A	0.00115604	0.0368399	6.76275	16	Prupe.4G104300, Prupe.4G104500, Prupe.4G135100, Prupe.4G135600, Prupe.4G195000, Prupe.4G195400, Prupe.4G195500, Prupe.4G251300, Prupe.6G017000, Prupe.6G017500, Prupe.6G159000, Prupe.6G164900, Prupe.6G165100, Prupe.6G165300, Prupe.6G165400, Prupe.6G165500
GO:0106311	#N/A	#N/A	0.00115604	0.0368399	6.76275	16	Prupe.4G104300, Prupe.4G104500, Prupe.4G135100, Prupe.4G135600, Prupe.4G195000, Prupe.4G195400, Prupe.4G195500, Prupe.4G251300, Prupe.6G017000, Prupe.6G017500, Prupe.6G159000, Prupe.6G164900, Prupe.6G165100, Prupe.6G165300, Prupe.6G165400, Prupe.6G165500
GO:0071446	BP	cellular response to salicylic acid stimulus	0.0013982	0.0419927	6.57257	7	Prupe.3G135100, Prupe.4G144900, Prupe.4G202700, Prupe.4G202900, Prupe.4G203500, Prupe.7G182400, Prupe.8G110300
GO:0080043	MF	quercetin 3-O-glucosyltransferase activity	0.00211424	0.059529	6.15906	12	Prupe.1G053300, Prupe.1G519500, Prupe.1G520100, Prupe.3G189100, Prupe.3G189300, Prupe.6G007700, Prupe.6G008600, Prupe.6G008700, Prupe.6G190600, Prupe.6G211600, Prupe.8G063500, Prupe.8G135700
GO:0080044	MF	quercetin 7-O-glucosyltransferase activity	0.00211424	0.059529	6.15906	12	Prupe.1G053300, Prupe.1G519500, Prupe.1G520100, Prupe.3G189100, Prupe.3G189300, Prupe.6G007700, Prupe.6G008600, Prupe.6G008700, Prupe.6G190600, Prupe.6G211600, Prupe.8G063500, Prupe.8G135700
GO:0016829	MF	lyase activity	0.00267526	0.0730426	5.92371	22	Prupe.1G565500, Prupe.3G157200, Prupe.4G030300, Prupe.4G125300, Prupe.4G125500, Prupe.4G197900, Prupe.4G198000, Prupe.4G198600, Prupe.4G198700, Prupe.4G199000, Prupe.4G199300, Prupe.4G238400, Prupe.4G238800, Prupe.5G089100, Prupe.5G245600, Prupe.6G036700, Prupe.6G080400, Prupe.6G116600, Prupe.6G211000, Prupe.7G165400, Prupe.8G025400, Prupe.8G215200
GO:0016310	BP	phosphorylation	0.00292124	0.0768257	5.83575	58	Prupe.1G168400, Prupe.1G201100, Prupe.1G439100, Prupe.1G459200, Prupe.1G469100, Prupe.1G505700, Prupe.2G047500, Prupe.2G048700, Prupe.2G088200, Prupe.2G088400, Prupe.2G092800, Prupe.2G093000, Prupe.2G093300, Prupe.2G103400, Prupe.2G116200, Prupe.2G116300, Prupe.3G055100, Prupe.3G055400, Prupe.3G055900, Prupe.3G058200, Prupe.3G059200, Prupe.3G145600, Prupe.3G152600, Prupe.4G093000, Prupe.4G094100,…
GO:0016301	MF	kinase activity	0.00298435	0.0768257	5.81437	56	Prupe.1G168400, Prupe.1G201100, Prupe.1G439100, Prupe.1G459200, Prupe.1G469100, Prupe.1G505700, Prupe.2G047500, Prupe.2G048700, Prupe.2G088200, Prupe.2G088400, Prupe.2G092800, Prupe.2G093000, Prupe.2G093300, Prupe.2G103400, Prupe.2G116200, Prupe.2G116300, Prupe.3G055100, Prupe.3G055400, Prupe.3G055900, Prupe.3G058200, Prupe.3G145600, Prupe.3G152600, Prupe.4G093000, Prupe.4G094100, Prupe.4G135100,…
GO:0048544	BP	recognition of pollen	0.00360289	0.0877352	5.62602	10	Prupe.3G226700, Prupe.4G195000, Prupe.4G195400, Prupe.4G195500, Prupe.4G251300, Prupe.6G017000, Prupe.6G017500, Prupe.6G164900, Prupe.6G165100, Prupe.6G165500
GO:0016616	MF	oxidoreductase activity, acting on the CH-OH group of donors, NAD or NADP as acceptor	0.00358737	0.0877352	5.63034	15	Prupe.1G063200, Prupe.1G587500, Prupe.2G020700, Prupe.2G150200, Prupe.5G005000, Prupe.6G051200, Prupe.6G051300, Prupe.6G162000, Prupe.6G205700, Prupe.6G205900, Prupe.6G206600, Prupe.6G207300, Prupe.6G207500, Prupe.6G207900, Prupe.I003000
GO:0045551	MF	cinnamyl-alcohol dehydrogenase activity	0.00403935	0.0957752	5.51167	6	Prupe.6G205700, Prupe.6G205900, Prupe.6G206600, Prupe.6G207300, Prupe.6G207500, Prupe.6G207900
GO:0009765	BP	photosynthesis, light harvesting	0.00439498	0.098997	5.42729	5	Prupe.1G225700, Prupe.3G174600, Prupe.4G076200, Prupe.4G190500, Prupe.8G142700
GO:0009768	BP	photosynthesis, light harvesting in photosystem I	0.00439498	0.098997	5.42729	5	Prupe.1G225700, Prupe.3G174600, Prupe.4G076200, Prupe.4G190500, Prupe.8G142700
GO:0051213	MF	dioxygenase activity	0.00480349	0.10556	5.33841	12	Prupe.1G417300, Prupe.1G449200, Prupe.1G449300, Prupe.1G468300, Prupe.1G502300, Prupe.1G502500, Prupe.1G535600, Prupe.2G005500, Prupe.5G048100, Prupe.6G018700, Prupe.8G011000, Prupe.I003900
GO:0008757	MF	S-adenosylmethionine-dependent methyltransferase activity	0.00495212	0.106235	5.30794	11	Prupe.1G227100, Prupe.2G107200, Prupe.3G119100, Prupe.3G119800, Prupe.3G120400, Prupe.3G129200, Prupe.3G129400, Prupe.3G129800, Prupe.3G235500, Prupe.8G093100, Prupe.8G171100
GO:0016740	MF	transferase activity	0.00515459	0.108007	5.26787	114	Prupe.1G053300, Prupe.1G088600, Prupe.1G088900, Prupe.1G168400, Prupe.1G179000, Prupe.1G179400, Prupe.1G201100, Prupe.1G227100, Prupe.1G310500, Prupe.1G383000, Prupe.1G401500, Prupe.1G439100, Prupe.1G458200, Prupe.1G459200, Prupe.1G469100, Prupe.1G483200, Prupe.1G505700, Prupe.1G519500, Prupe.1G520100, Prupe.2G043800, Prupe.2G047500, Prupe.2G048700, Prupe.2G085300, Prupe.2G088200, Prupe.2G088400,…
GO:0004970	MF	ionotropic glutamate receptor activity	0.00561731	0.112471	5.1819	6	Prupe.1G400000, Prupe.1G400300, Prupe.1G400400, Prupe.2G105200, Prupe.7G106900, Prupe.7G184400
GO:0016168	MF	chlorophyll binding	0.00550457	0.112471	5.20218	5	Prupe.1G225700, Prupe.3G174600, Prupe.4G076200, Prupe.4G190500, Prupe.8G142700
GO:0016844	MF	strictosidine synthase activity	0.00581411	0.113881	5.14747	3	Prupe.1G192200, Prupe.1G299700, Prupe.7G179100
GO:0015276	MF	ligand-gated ion channel activity	0.0062807	0.120402	5.07027	6	Prupe.1G400000, Prupe.1G400300, Prupe.1G400400, Prupe.2G105200, Prupe.7G106900, Prupe.7G184400
GO:0009523	CC	photosystem II	0.00645549	0.121175	5.04282	8	Prupe.1G225700, Prupe.1G277200, Prupe.1G406000, Prupe.3G174600, Prupe.4G076200, Prupe.4G190500, Prupe.6G259200, Prupe.8G142700
GO:0009809	BP	lignin biosynthetic process	0.00667922	0.122816	5.00875	6	Prupe.6G205700, Prupe.6G205900, Prupe.6G206600, Prupe.6G207300, Prupe.6G207500, Prupe.6G207900
GO:0047617	MF	acyl-CoA hydrolase activity	0.00782471	0.141001	4.85047	4	Prupe.2G157800, Prupe.6G062000, Prupe.6G062100, Prupe.6G062300
GO:0009522	CC	photosystem I	0.00828722	0.145466	4.79304	6	Prupe.1G225700, Prupe.3G174600, Prupe.4G076200, Prupe.4G190500, Prupe.6G035200, Prupe.8G142700
GO:0005524	MF	ATP binding	0.00839539	0.145466	4.78007	114	Prupe.1G157800, Prupe.1G168400, Prupe.1G200900, Prupe.1G201100, Prupe.1G205100, Prupe.1G315100, Prupe.1G368500, Prupe.1G383000, Prupe.1G422500, Prupe.1G439100, Prupe.1G459200, Prupe.1G469100, Prupe.1G471300, Prupe.1G505700, Prupe.1G510800, Prupe.1G515600, Prupe.1G515700, Prupe.1G515800, Prupe.2G047500, Prupe.2G048700, Prupe.2G078300, Prupe.2G084300, Prupe.2G088200, Prupe.2G088400, Prupe.2G088800,…
GO:0031347	BP	regulation of defense response	0.00888405	0.148232	4.7235	7	Prupe.3G135100, Prupe.4G144900, Prupe.4G202700, Prupe.4G202900, Prupe.4G203500, Prupe.7G182400, Prupe.8G110300
GO:0004525	MF	ribonuclease III activity	0.00874056	0.148232	4.73978	4	Prupe.4G219300, Prupe.4G219400, Prupe.4G219500, Prupe.8G202000
GO:0034220	BP	ion transmembrane transport	0.00926115	0.151715	4.68193	11	Prupe.1G400000, Prupe.1G400300, Prupe.1G400400, Prupe.2G030700, Prupe.2G105200, Prupe.4G092800, Prupe.6G005500, Prupe.7G106900, Prupe.7G184400, Prupe.8G097600, Prupe.8G097800
GO:0042277	MF	peptide binding	0.0103145	0.165952	4.57421	2	Prupe.1G457200, Prupe.3G044500
GO:0016747	MF	transferase activity, transferring acyl groups other than amino-acyl groups	0.011785	0.183073	4.44093	16	Prupe.1G236800, Prupe.1G237100, Prupe.1G310500, Prupe.1G401500, Prupe.1G432300, Prupe.1G432400, Prupe.1G533000, Prupe.3G027900, Prupe.3G100800, Prupe.3G101100, Prupe.3G101500, Prupe.3G101600, Prupe.3G253600, Prupe.4G252100, Prupe.4G253000, Prupe.5G059300
GO:0030553	MF	cGMP binding	0.0116951	0.183073	4.44858	2	Prupe.1G205100, Prupe.8G097600
GO:0098542	BP	defense response to other organism	0.012272	0.187408	4.40043	5	Prupe.1G386900, Prupe.1G387200, Prupe.1G387500, Prupe.1G538000, Prupe.6G212300
GO:0009696	BP	salicylic acid metabolic process	0.014652	0.206273	4.22318	4	Prupe.6G040000, Prupe.7G141100, Prupe.7G141300, Prupe.8G115300
GO:0043171	BP	peptide catabolic process	0.0137822	0.206273	4.28438	2	Prupe.1G457200, Prupe.3G044500
GO:0080030	MF	methyl indole-3-acetate esterase activity	0.014652	0.206273	4.22318	4	Prupe.6G040000, Prupe.7G141100, Prupe.7G141300, Prupe.8G115300
GO:0080031	MF	methyl salicylate esterase activity	0.014652	0.206273	4.22318	4	Prupe.6G040000, Prupe.7G141100, Prupe.7G141300, Prupe.8G115300
GO:0080032	MF	methyl jasmonate esterase activity	0.014652	0.206273	4.22318	4	Prupe.6G040000, Prupe.7G141100, Prupe.7G141300, Prupe.8G115300
GO:0070545	CC	PeBoW complex	0.0163375	0.226463	4.11429	2	Prupe.8G015200, Prupe.8G015700
GO:0030247	MF	polysaccharide binding	0.0168699	0.2303	4.08222	12	Prupe.2G047500, Prupe.2G088400, Prupe.2G092800, Prupe.2G093000, Prupe.2G093300, Prupe.2G103400, Prupe.3G145600, Prupe.3G181800, Prupe.3G226700, Prupe.4G093000, Prupe.4G094100, Prupe.6G141600
GO:0050662	MF	coenzyme binding	0.0173428	0.233221	4.05458	6	Prupe.1G587500, Prupe.2G020700, Prupe.5G005000, Prupe.6G051200, Prupe.6G051300, Prupe.I003000
GO:0090502	BP	RNA phosphodiester bond hydrolysis, endonucleolytic	0.0190949	0.245779	3.95833	15	Prupe.1G202000, Prupe.2G022700, Prupe.2G036800, Prupe.2G044300, Prupe.3G190000, Prupe.4G174500, Prupe.4G219300, Prupe.4G219400, Prupe.4G219500, Prupe.6G094500, Prupe.6G141500, Prupe.7G083900, Prupe.7G120900, Prupe.8G042700, Prupe.8G202000
GO:0009694	BP	jasmonic acid metabolic process	0.0189206	0.245779	3.9675	4	Prupe.6G040000, Prupe.7G141100, Prupe.7G141300, Prupe.8G115300
GO:0009579	CC	thylakoid	0.0186509	0.245779	3.98186	10	Prupe.1G225700, Prupe.1G277200, Prupe.1G497100, Prupe.2G198900, Prupe.2G238800, Prupe.3G174600, Prupe.4G076200, Prupe.4G136700, Prupe.4G190500, Prupe.8G142700
GO:0010277	MF	chlorophyllide a oxygenase [overall] activity	0.019544	0.248016	3.93509	2	Prupe.1G397100, Prupe.1G397200
GO:0005795	CC	Golgi stack	0.020481	0.256296	3.88826	2	Prupe.3G293500, Prupe.8G258500
GO:0018298	BP	protein-chromophore linkage	0.0225855	0.27876	3.79045	5	Prupe.1G225700, Prupe.3G174600, Prupe.4G076200, Prupe.4G190500, Prupe.8G142700
GO:0000166	MF	nucleotide binding	0.0262151	0.319186	3.64142	88	Prupe.1G168400, Prupe.1G200900, Prupe.1G201100, Prupe.1G368500, Prupe.1G383000, Prupe.1G422500, Prupe.1G439100, Prupe.1G459200, Prupe.1G469100, Prupe.1G471300, Prupe.1G505700, Prupe.1G572400, Prupe.2G047500, Prupe.2G048700, Prupe.2G078300, Prupe.2G084300, Prupe.2G088200, Prupe.2G088400, Prupe.2G092800, Prupe.2G093000, Prupe.2G093300, Prupe.2G103400, Prupe.2G116200, Prupe.2G116300, Prupe.2G188500,…
GO:0000466	BP	maturation of 5.8S rRNA from tricistronic rRNA transcript (SSU-rRNA, 5.8S rRNA, LSU-rRNA)	0.0267814	0.321734	3.62005	2	Prupe.8G015200, Prupe.8G015700
GO:0016702	MF	oxidoreductase activity, acting on single donors with incorporation of molecular oxygen, incorporation of two atoms of oxygen	0.0278903	0.330647	3.57948	4	Prupe.1G449200, Prupe.1G449300, Prupe.2G005500, Prupe.6G018700
GO:0044419	BP	interspecies interaction between organisms	0.0290493	0.33336	3.53876	1	Prupe.3G094600
GO:0090042	BP	tubulin deacetylation	0.0292291	0.33336	3.53259	1	Prupe.4G272300
GO:0042903	MF	tubulin deacetylase activity	0.0292291	0.33336	3.53259	1	Prupe.4G272300
GO:0047641	MF	aldose-6-phosphate reductase (NADPH) activity	0.0306427	0.345113	3.48536	1	Prupe.8G083400
GO:0015976	BP	carbon utilization	0.0312597	0.347716	3.46542	2	Prupe.6G080400, Prupe.8G025400
GO:0008234	MF	cysteine-type peptidase activity	0.0332238	0.36069	3.40449	14	Prupe.1G130900, Prupe.1G201000, Prupe.1G350400, Prupe.1G397800, Prupe.2G155700, Prupe.3G106000, Prupe.3G106300, Prupe.3G120900, Prupe.3G129900, Prupe.4G092400, Prupe.4G198900, Prupe.4G254500, Prupe.4G261000, Prupe.5G238300
GO:0003854	MF	3-beta-hydroxy-delta5-steroid dehydrogenase activity	0.0332267	0.36069	3.4044	3	Prupe.1G063200, Prupe.2G020700, Prupe.I003000
GO:0015979	BP	photosynthesis	0.0354186	0.366807	3.34052	10	Prupe.1G225700, Prupe.1G277200, Prupe.1G406000, Prupe.1G497100, Prupe.3G157200, Prupe.3G174600, Prupe.4G076200, Prupe.4G190500, Prupe.6G035200, Prupe.8G142700
GO:0008272	BP	sulfate transport	0.0353182	0.366807	3.34336	3	Prupe.1G558300, Prupe.4G093900, Prupe.8G067800
GO:1902358	BP	sulfate transmembrane transport	0.0353182	0.366807	3.34336	3	Prupe.1G558300, Prupe.4G093900, Prupe.8G067800
GO:0015116	MF	sulfate transmembrane transporter activity	0.0353182	0.366807	3.34336	3	Prupe.1G558300, Prupe.4G093900, Prupe.8G067800
GO:0015720	BP	allantoin transport	0.0402048	0.39239	3.21377	1	Prupe.1G286600
GO:0071705	BP	nitrogen compound transport	0.0402048	0.39239	3.21377	1	Prupe.1G286600
GO:1903791	BP	uracil transmembrane transport	0.0402048	0.39239	3.21377	1	Prupe.1G286600
GO:0004523	MF	RNA-DNA hybrid ribonuclease activity	0.0405019	0.39239	3.20641	11	Prupe.1G202000, Prupe.2G022700, Prupe.2G036800, Prupe.2G044300, Prupe.3G190000, Prupe.4G174500, Prupe.6G094500, Prupe.6G141500, Prupe.7G083900, Prupe.7G120900, Prupe.8G042700
GO:0005274	MF	allantoin:proton symporter activity	0.0402048	0.39239	3.21377	1	Prupe.1G286600
GO:0015505	MF	uracil:cation symporter activity	0.0402048	0.39239	3.21377	1	Prupe.1G286600
GO:0030422	BP	production of siRNA involved in RNA interference	0.0427595	0.399557	3.15216	4	Prupe.4G219300, Prupe.4G219400, Prupe.4G219500, Prupe.8G202000
GO:0016104	BP	triterpenoid biosynthetic process	0.0439025	0.399557	3.12578	2	Prupe.3G026200, Prupe.3G026400
GO:0042626	MF	ATPase-coupled transmembrane transporter activity	0.0420287	0.399557	3.1694	8	Prupe.1G471300, Prupe.2G084300, Prupe.2G305600, Prupe.3G059800, Prupe.3G060000, Prupe.3G273300, Prupe.4G254600, Prupe.6G191500
GO:0000250	MF	lanosterol synthase activity	0.0439025	0.399557	3.12578	2	Prupe.3G026200, Prupe.3G026400
GO:0042300	MF	beta-amyrin synthase activity	0.0439025	0.399557	3.12578	2	Prupe.3G026200, Prupe.3G026400
GO:0003913	MF	DNA photolyase activity	0.042425	0.399557	3.16002	1	Prupe.1G462400
GO:0010287	CC	plastoglobule	0.0447764	0.403435	3.10607	4	Prupe.3G174600, Prupe.4G076200, Prupe.4G190500, Prupe.8G142700
GO:0000977	MF	RNA polymerase II transcription regulatory region sequence-specific DNA binding	0.0455814	0.406622	3.08826	7	Prupe.1G223600, Prupe.1G371300, Prupe.1G531100, Prupe.1G531400, Prupe.2G047900, Prupe.7G039800, Prupe.8G069300
GO:0055085	BP	transmembrane transport	0.0482227	0.413797	3.03192	48	Prupe.1G209400, Prupe.1G257500, Prupe.1G286600, Prupe.1G346300, Prupe.1G444900, Prupe.1G449500, Prupe.1G471300, Prupe.1G490200, Prupe.1G500600, Prupe.1G558300, Prupe.2G024100, Prupe.2G084300, Prupe.2G305600, Prupe.3G009400, Prupe.3G059800, Prupe.3G060000, Prupe.3G066900, Prupe.3G071100, Prupe.3G077900, Prupe.3G149800, Prupe.3G191000, Prupe.3G273300, Prupe.4G092800, Prupe.4G093900, Prupe.4G117100,…
GO:0006094	BP	gluconeogenesis	0.0474796	0.413797	3.04745	3	Prupe.4G136700, Prupe.6G076500, Prupe.6G211000
GO:0080038	BP	positive regulation of cytokinin-activated signaling pathway	0.0469427	0.413797	3.05883	1	Prupe.6G123100
GO:0004601	MF	peroxidase activity	0.0478292	0.413797	3.04012	10	Prupe.2G320000, Prupe.4G276800, Prupe.5G230200, Prupe.6G013400, Prupe.6G013500, Prupe.6G044700, Prupe.6G044800, Prupe.6G088800, Prupe.6G242200, Prupe.8G116400
GO:0035539	MF	8-oxo-7,8-dihydrodeoxyguanosine triphosphate pyrophosphatase activity	0.0499852	0.424874	2.99603	2	Prupe.1G303000, Prupe.1G303100
GO:0009058	BP	biosynthetic process	0.0509921	0.429382	2.97608	8	Prupe.1G192200, Prupe.1G299700, Prupe.3G133000, Prupe.4G252100, Prupe.4G253000, Prupe.5G016200, Prupe.7G179100, Prupe.8G093400
GO:0009908	BP	flower development	0.0576077	0.44391	2.8541	4	Prupe.1G535600, Prupe.6G334400, Prupe.6G334500, Prupe.6G334600
GO:0051214	BP	RNA virus induced gene silencing	0.056388	0.44391	2.8755	1	Prupe.8G202000
GO:0006208	BP	pyrimidine nucleobase catabolic process	0.0572562	0.44391	2.86022	1	Prupe.4G264000
GO:0045056	BP	transcytosis	0.0578146	0.44391	2.85051	1	Prupe.3G293500
GO:0031507	BP	heterochromatin assembly	0.0612487	0.44391	2.79281	1	Prupe.6G130500
GO:0009780	BP	photosynthetic NADP+ reduction	0.062362	0.44391	2.7748	1	Prupe.6G035200
GO:0042550	BP	photosystem I stabilization	0.062362	0.44391	2.7748	1	Prupe.6G035200
GO:0010231	BP	maintenance of seed dormancy	0.0630215	0.44391	2.76428	1	Prupe.4G140900
GO:0006778	BP	porphyrin-containing compound metabolic process	0.0630638	0.44391	2.76361	1	Prupe.8G258500
GO:0005887	CC	integral component of plasma membrane	0.0597764	0.44391	2.81714	8	Prupe.1G558300, Prupe.4G093900, Prupe.4G284200, Prupe.4G284700, Prupe.4G285000, Prupe.4G285300, Prupe.4G285400, Prupe.6G026300
GO:0016035	CC	zeta DNA polymerase complex	0.0558708	0.44391	2.88471	2	Prupe.1G328900, Prupe.6G025200
GO:0030690	CC	Noc1p-Noc2p complex	0.0611686	0.44391	2.79412	1	Prupe.6G014700
GO:0030691	CC	Noc2p-Noc3p complex	0.0611686	0.44391	2.79412	1	Prupe.6G014700
GO:0008623	CC	CHRAC	0.0612487	0.44391	2.79281	1	Prupe.6G130500
GO:0042807	CC	central vacuole	0.061883	0.44391	2.78251	1	Prupe.1G449500
GO:0008061	MF	chitin binding	0.0590589	0.44391	2.82922	4	Prupe.1G204000, Prupe.1G205600, Prupe.7G258700, Prupe.7G258800
GO:0043021	MF	ribonucleoprotein complex binding	0.0549941	0.44391	2.90053	2	Prupe.8G015200, Prupe.8G015700
GO:0016688	MF	L-ascorbate peroxidase activity	0.0595239	0.44391	2.82138	2	Prupe.2G320000, Prupe.6G242200
GO:0050278	MF	sedoheptulose-bisphosphatase activity	0.0553216	0.44391	2.89459	1	Prupe.4G136700
GO:0004157	MF	dihydropyrimidinase activity	0.0572562	0.44391	2.86022	1	Prupe.4G264000
GO:0043014	MF	alpha-tubulin binding	0.0573545	0.44391	2.8585	1	Prupe.4G272300
GO:0090501	BP	RNA phosphodiester bond hydrolysis	0.0635747	0.444038	2.75554	4	Prupe.4G219300, Prupe.4G219400, Prupe.4G219500, Prupe.8G202000
GO:0000070	BP	mitotic sister chromatid segregation	0.0653055	0.452175	2.72868	2	Prupe.8G049400, Prupe.8G052800
GO:0016121	BP	carotene catabolic process	0.0667162	0.452175	2.70731	2	Prupe.1G449200, Prupe.1G449300
GO:0005515	MF	protein binding	0.0672491	0.452175	2.69935	158	Prupe.1G018700, Prupe.1G061500, Prupe.1G134400, Prupe.1G147100, Prupe.1G157900, Prupe.1G158000, Prupe.1G158200, Prupe.1G161400, Prupe.1G162200, Prupe.1G162500, Prupe.1G168400, Prupe.1G201100, Prupe.1G244900, Prupe.1G273800, Prupe.1G281000, Prupe.1G285300, Prupe.1G343300, Prupe.1G386600, Prupe.1G398700, Prupe.1G409700, Prupe.1G449400, Prupe.1G481700, Prupe.1G488000, Prupe.1G488300, Prupe.1G495700,…
GO:0000287	MF	magnesium ion binding	0.0669329	0.452175	2.70406	10	Prupe.4G030300, Prupe.4G125300, Prupe.4G125500, Prupe.4G197900, Prupe.4G198000, Prupe.4G198600, Prupe.4G198700, Prupe.4G199000, Prupe.4G199300, Prupe.4G238400
GO:0010436	MF	carotenoid dioxygenase activity	0.0667162	0.452175	2.70731	2	Prupe.1G449200, Prupe.1G449300
GO:0006203	BP	dGTP catabolic process	0.068598	0.457828	2.67949	2	Prupe.1G303000, Prupe.1G303100
GO:0070006	MF	metalloaminopeptidase activity	0.0717097	0.475077	2.63513	2	Prupe.1G457200, Prupe.3G044500
GO:0005986	BP	sucrose biosynthetic process	0.0729294	0.476155	2.61826	2	Prupe.1G483200, Prupe.4G136700
GO:0003724	MF	RNA helicase activity	0.0726249	0.476155	2.62245	5	Prupe.1G368500, Prupe.1G422500, Prupe.2G078200, Prupe.2G078300, Prupe.8G103900
GO:0009902	BP	chloroplast relocation	0.0739821	0.479553	2.60393	1	Prupe.1G498000
GO:0034440	BP	lipid oxidation	0.0757507	0.48751	2.58031	2	Prupe.2G005500, Prupe.6G018700
GO:0005375	MF	copper ion transmembrane transporter activity	0.0765484	0.489149	2.56983	2	Prupe.6G007600, Prupe.6G066900
GO:0006694	BP	steroid biosynthetic process	0.0791731	0.498846	2.53612	3	Prupe.1G063200, Prupe.2G020700, Prupe.I003000
GO:0051721	MF	protein phosphatase 2A binding	0.0789835	0.498846	2.53852	1	Prupe.4G272300
GO:0010207	BP	photosystem II assembly	0.0818646	0.501768	2.50269	2	Prupe.3G235100, Prupe.6G259200
GO:0006525	BP	arginine metabolic process	0.0817188	0.501768	2.50447	1	Prupe.3G094600
GO:0019904	MF	protein domain specific binding	0.080247	0.501768	2.52265	3	Prupe.1G302200, Prupe.1G518200, Prupe.8G142700
GO:0003992	MF	N2-acetyl-L-ornithine:2-oxoglutarate 5-aminotransferase activity	0.0817188	0.501768	2.50447	1	Prupe.3G094600
GO:0043039	BP	tRNA aminoacylation	0.0832572	0.506857	2.48582	2	Prupe.8G045400, Prupe.8G074400
GO:0006878	BP	cellular copper ion homeostasis	0.0839739	0.507789	2.47725	2	Prupe.6G007600, Prupe.6G066900
GO:0048211	BP	Golgi vesicle docking	0.0854474	0.513254	2.45985	1	Prupe.3G293500
GO:0042766	BP	nucleosome mobilization	0.0876666	0.519389	2.43421	1	Prupe.6G130500
GO:0051604	BP	protein maturation	0.0887745	0.519389	2.42166	1	Prupe.8G034000
GO:0033597	CC	mitotic checkpoint complex	0.0882812	0.519389	2.42723	1	Prupe.1G281000
GO:1990298	CC	bub1-bub3 complex	0.0882812	0.519389	2.42723	1	Prupe.1G281000
GO:0042283	MF	dolichyl pyrophosphate Glc1Man9GlcNAc2 alpha-1,3-glucosyltransferase activity	0.0901625	0.524106	2.40614	1	Prupe.2G117600
GO:0006396	BP	RNA processing	0.0925333	0.531035	2.38019	7	Prupe.2G164500, Prupe.4G219300, Prupe.4G219400, Prupe.4G219500, Prupe.6G139700, Prupe.8G042700, Prupe.8G202000
GO:0009644	BP	response to high light intensity	0.0924197	0.531035	2.38142	2	Prupe.6G259200, Prupe.8G142700
GO:0004869	MF	cysteine-type endopeptidase inhibitor activity	0.0932201	0.53159	2.37279	3	Prupe.1G014700, Prupe.1G172900, Prupe.6G034500
GO:0010181	MF	FMN binding	0.0966041	0.547423	2.33713	4	Prupe.1G548600, Prupe.1G548800, Prupe.2G038000, Prupe.3G037200
GO:0042744	BP	hydrogen peroxide catabolic process	0.105433	0.56642	2.24968	8	Prupe.2G320000, Prupe.4G276800, Prupe.6G013400, Prupe.6G013500, Prupe.6G044700, Prupe.6G044800, Prupe.6G242200, Prupe.8G116400
GO:0009416	BP	response to light stimulus	0.103686	0.56642	2.26638	6	Prupe.1G225700, Prupe.1G535600, Prupe.3G174600, Prupe.4G076200, Prupe.4G190500, Prupe.8G142700
GO:0031408	BP	oxylipin biosynthetic process	0.105433	0.56642	2.24968	2	Prupe.2G005500, Prupe.6G018700
GO:0030639	BP	polyketide biosynthetic process	0.110372	0.56642	2.2039	2	Prupe.4G252100, Prupe.4G253000
GO:0035434	BP	copper ion transmembrane transport	0.111794	0.56642	2.1911	2	Prupe.6G007600, Prupe.6G066900
GO:0006825	BP	copper ion transport	0.113391	0.56642	2.17691	2	Prupe.6G007600, Prupe.6G066900
GO:2001141	BP	regulation of RNA biosynthetic process	0.108962	0.56642	2.21675	1	Prupe.1G443200
GO:0051607	BP	defense response to virus	0.11132	0.56642	2.19535	1	Prupe.8G202000
GO:0010216	BP	maintenance of DNA methylation	0.11781	0.56642	2.13868	1	Prupe.8G202000
GO:0009854	BP	oxidative photosynthetic carbon pathway	0.118448	0.56642	2.13328	1	Prupe.3G037200
GO:0015671	BP	oxygen transport	0.118544	0.56642	2.13247	1	Prupe.8G107300
GO:0009405	BP	pathogenesis	0.119602	0.56642	2.12359	1	Prupe.2G097700
GO:0005785	CC	signal recognition particle receptor complex	0.10604	0.56642	2.24394	1	Prupe.4G272800
GO:0030093	CC	chloroplast photosystem I	0.121331	0.56642	2.10924	1	Prupe.6G035200
GO:0022857	MF	transmembrane transporter activity	0.104782	0.56642	2.25588	24	Prupe.1G257500, Prupe.1G286600, Prupe.1G490200, Prupe.1G500600, Prupe.2G024100, Prupe.3G066900, Prupe.3G071100, Prupe.3G077900, Prupe.3G149800, Prupe.4G244400, Prupe.5G006100, Prupe.6G060100, Prupe.6G091800, Prupe.6G091900, Prupe.6G151200, Prupe.6G195500, Prupe.6G249600, Prupe.6G250900, Prupe.6G252300, Prupe.6G272400, Prupe.6G272600, Prupe.7G241900, Prupe.8G028900, Prupe.8G067800
GO:0044183	MF	protein folding chaperone	0.119972	0.56642	2.1205	4	Prupe.2G234200, Prupe.2G234400, Prupe.4G140900, Prupe.6G079800
GO:0008271	MF	secondary active sulfate transmembrane transporter activity	0.105109	0.56642	2.25275	2	Prupe.1G558300, Prupe.4G093900
GO:0015301	MF	anion:anion antiporter activity	0.105109	0.56642	2.25275	2	Prupe.1G558300, Prupe.4G093900
GO:0003725	MF	double-stranded RNA binding	0.107581	0.56642	2.22951	2	Prupe.2G164500, Prupe.8G202000
GO:0042625	MF	ATPase-coupled ion transmembrane transporter activity	0.109499	0.56642	2.21184	1	Prupe.6G005500
GO:0048487	MF	beta-tubulin binding	0.11118	0.56642	2.1966	1	Prupe.4G272300
GO:0004534	MF	5'-3' exoribonuclease activity	0.111643	0.56642	2.19245	1	Prupe.6G141200
GO:0003935	MF	GTP cyclohydrolase II activity	0.111969	0.56642	2.18954	1	Prupe.6G085600
GO:0008686	MF	3,4-dihydroxy-2-butanone-4-phosphate synthase activity	0.111969	0.56642	2.18954	1	Prupe.6G085600
GO:0003960	MF	NADPH:quinone reductase activity	0.113214	0.56642	2.17848	1	Prupe.2G274600
GO:0046524	MF	sucrose-phosphate synthase activity	0.113422	0.56642	2.17664	1	Prupe.1G483200
GO:0102293	MF	pheophytinase b activity	0.114459	0.56642	2.16754	1	Prupe.8G235600
GO:0052852	MF	very-long-chain-(S)-2-hydroxy-acid oxidase activity	0.118448	0.56642	2.13328	1	Prupe.3G037200
GO:0052853	MF	long-chain-(S)-2-hydroxy-long-chain-acid oxidase activity	0.118448	0.56642	2.13328	1	Prupe.3G037200
GO:0052854	MF	medium-chain-(S)-2-hydroxy-acid oxidase activity	0.118448	0.56642	2.13328	1	Prupe.3G037200
GO:0005344	MF	oxygen carrier activity	0.118544	0.56642	2.13247	1	Prupe.8G107300
GO:0019825	MF	oxygen binding	0.118544	0.56642	2.13247	1	Prupe.8G107300
GO:0004563	MF	beta-N-acetylhexosaminidase activity	0.120757	0.56642	2.11398	1	Prupe.2G227600
GO:0102148	MF	N-acetyl-beta-D-galactosaminidase activity	0.120757	0.56642	2.11398	1	Prupe.2G227600
GO:0005730	CC	nucleolus	0.123035	0.571413	2.09529	14	Prupe.1G146000, Prupe.1G462200, Prupe.1G568900, Prupe.1G572400, Prupe.2G164500, Prupe.3G262700, Prupe.5G053600, Prupe.6G014700, Prupe.6G204500, Prupe.7G186700, Prupe.8G015200, Prupe.8G015700, Prupe.8G084800, Prupe.8G202000
GO:0009097	BP	isoleucine biosynthetic process	0.125057	0.576881	2.07898	2	Prupe.5G132200, Prupe.6G116600
GO:0008422	MF	beta-glucosidase activity	0.125492	0.576881	2.07551	6	Prupe.2G092900, Prupe.6G019000, Prupe.6G136300, Prupe.6G156300, Prupe.6G156400, Prupe.6G156500
GO:0009607	BP	response to biotic stimulus	0.128975	0.578141	2.04814	7	Prupe.1G327300, Prupe.1G327500, Prupe.1G327700, Prupe.1G328200, Prupe.1G328600, Prupe.1G329000, Prupe.6G239100
GO:0090116	BP	C-5 methylation of cytosine	0.128564	0.578141	2.05133	1	Prupe.7G060100
GO:0006425	BP	glutaminyl-tRNA aminoacylation	0.128607	0.578141	2.05099	1	Prupe.8G045400
GO:0003886	MF	DNA (cytosine-5-)-methyltransferase activity	0.128564	0.578141	2.05133	1	Prupe.7G060100
GO:0004819	MF	glutamine-tRNA ligase activity	0.128607	0.578141	2.05099	1	Prupe.8G045400
GO:0098869	BP	cellular oxidant detoxification	0.137739	0.578704	1.98239	10	Prupe.2G320000, Prupe.4G276800, Prupe.5G230200, Prupe.6G013400, Prupe.6G013500, Prupe.6G044700, Prupe.6G044800, Prupe.6G088800, Prupe.6G242200, Prupe.8G116400
GO:0098656	BP	anion transmembrane transport	0.132244	0.578704	2.02311	3	Prupe.1G558300, Prupe.4G093900, Prupe.5G186500
GO:0042273	BP	ribosomal large subunit biogenesis	0.138696	0.578704	1.97547	3	Prupe.6G014700, Prupe.8G015200, Prupe.8G015700
GO:0031640	BP	killing of cells of other organism	0.151976	0.578704	1.88403	3	Prupe.1G341500, Prupe.1G341600, Prupe.8G071600
GO:0030162	BP	regulation of proteolysis	0.130807	0.578704	2.03403	2	Prupe.1G488000, Prupe.1G488300
GO:0030388	BP	fructose 1,6-bisphosphate metabolic process	0.131459	0.578704	2.02906	2	Prupe.4G136700, Prupe.7G165400
GO:0019985	BP	translesion synthesis	0.133567	0.578704	2.01315	2	Prupe.1G328900, Prupe.6G025200
GO:0071897	BP	DNA biosynthetic process	0.148446	0.578704	1.90754	2	Prupe.1G328900, Prupe.6G025200
GO:0035435	BP	phosphate ion transmembrane transport	0.149256	0.578704	1.90209	2	Prupe.1G278800, Prupe.8G067800
GO:0000719	BP	photoreactive repair	0.132583	0.578704	2.02055	1	Prupe.1G462400
GO:0000212	BP	meiotic spindle organization	0.132936	0.578704	2.01789	1	Prupe.8G052800
GO:1901006	BP	ubiquinone-6 biosynthetic process	0.139775	0.578704	1.96772	1	Prupe.8G025300
GO:0016477	BP	cell migration	0.140984	0.578704	1.95911	1	Prupe.6G181100
GO:0009645	BP	response to low light intensity stimulus	0.146401	0.578704	1.92141	1	Prupe.8G142700
GO:0010267	BP	production of ta-siRNAs involved in RNA interference	0.146841	0.578704	1.91841	1	Prupe.8G202000
GO:0006382	BP	adenosine to inosine editing	0.149275	0.578704	1.90197	1	Prupe.2G164500
GO:0016926	BP	protein desumoylation	0.15083	0.578704	1.8916	1	Prupe.4G261000
GO:0000417	CC	HIR complex	0.13656	0.578704	1.99099	1	Prupe.8G049400
GO:0008622	CC	epsilon DNA polymerase complex	0.147613	0.578704	1.91316	1	Prupe.6G130500
GO:0046872	MF	metal ion binding	0.151183	0.578704	1.88926	106	Prupe.1G035500, Prupe.1G137600, Prupe.1G150700, Prupe.1G225700, Prupe.1G227400, Prupe.1G230200, Prupe.1G230900, Prupe.1G231000, Prupe.1G231300, Prupe.1G242300, Prupe.1G291100, Prupe.1G386900, Prupe.1G387200, Prupe.1G387500, Prupe.1G397100, Prupe.1G397200, Prupe.1G410000, Prupe.1G417300, Prupe.1G428700, Prupe.1G447300, Prupe.1G449200, Prupe.1G449300, Prupe.1G457200, Prupe.1G466000, Prupe.1G497100,…
GO:0016787	MF	hydrolase activity	0.145555	0.578704	1.9272	82	Prupe.1G018600, Prupe.1G018700, Prupe.1G088600, Prupe.1G088900, Prupe.1G162200, Prupe.1G162500, Prupe.1G200900, Prupe.1G303000, Prupe.1G303100, Prupe.1G316200, Prupe.1G330800, Prupe.1G368500, Prupe.1G397700, Prupe.1G422500, Prupe.1G425500, Prupe.1G457200, Prupe.1G549400, Prupe.2G057100, Prupe.2G057600, Prupe.2G057800, Prupe.2G069000, Prupe.2G078300, Prupe.2G092900, Prupe.2G113100, Prupe.2G179300,…
GO:0043621	MF	protein self-association	0.140486	0.578704	1.96265	4	Prupe.2G243800, Prupe.4G272300, Prupe.6G066300, Prupe.6G066500
GO:0016866	MF	intramolecular transferase activity	0.140895	0.578704	1.95974	2	Prupe.3G026200, Prupe.3G026400
GO:0031490	MF	chromatin DNA binding	0.145405	0.578704	1.92823	2	Prupe.6G027400, Prupe.6G130500
GO:0004024	MF	alcohol dehydrogenase activity, zinc-dependent	0.146567	0.578704	1.92027	2	Prupe.8G018400, Prupe.8G207300
GO:0051903	MF	S-(hydroxymethyl)glutathione dehydrogenase activity	0.146567	0.578704	1.92027	2	Prupe.8G018400, Prupe.8G207300
GO:0004758	MF	serine C-palmitoyltransferase activity	0.134676	0.578704	2.00489	1	Prupe.5G016200
GO:0004611	MF	phosphoenolpyruvate carboxykinase activity	0.135061	0.578704	2.00203	1	Prupe.6G211000
GO:0004612	MF	phosphoenolpyruvate carboxykinase (ATP) activity	0.135061	0.578704	2.00203	1	Prupe.6G211000
GO:0003973	MF	(S)-2-hydroxy-acid oxidase activity	0.145071	0.578704	1.93053	1	Prupe.3G037200
GO:0071568	MF	UFM1 transferase activity	0.146335	0.578704	1.92186	1	Prupe.7G085600
GO:0019788	MF	NEDD8 transferase activity	0.146548	0.578704	1.9204	1	Prupe.1G383000
GO:0005452	MF	inorganic anion exchanger activity	0.148756	0.578704	1.90545	1	Prupe.3G077900
GO:0003726	MF	double-stranded RNA adenosine deaminase activity	0.149275	0.578704	1.90197	1	Prupe.2G164500
GO:0004806	MF	triglyceride lipase activity	0.150654	0.578704	1.89277	1	Prupe.1G420700
GO:0046863	MF	ribulose-1,5-bisphosphate carboxylase/oxygenase activator activity	0.152223	0.578704	1.88241	1	Prupe.2G238800
GO:0009082	BP	branched-chain amino acid biosynthetic process	0.153587	0.579005	1.87349	2	Prupe.5G132200, Prupe.6G116600
GO:0009102	BP	biotin biosynthetic process	0.153111	0.579005	1.87659	1	Prupe.5G016200
GO:0015698	BP	inorganic anion transport	0.155701	0.579695	1.85982	2	Prupe.3G077900, Prupe.5G186500
GO:0010821	BP	regulation of mitochondrion organization	0.15505	0.579695	1.86401	1	Prupe.3G239300
GO:0046983	MF	protein dimerization activity	0.155163	0.579695	1.86328	20	Prupe.1G150700, Prupe.1G223600, Prupe.1G371300, Prupe.1G531100, Prupe.1G531400, Prupe.2G047700, Prupe.2G047900, Prupe.3G119100, Prupe.3G120400, Prupe.3G129200, Prupe.3G129400, Prupe.3G129800, Prupe.3G235500, Prupe.6G121600, Prupe.6G121700, Prupe.6G139700, Prupe.7G039800, Prupe.7G129800, Prupe.8G069300, Prupe.8G171100
GO:0046294	BP	formaldehyde catabolic process	0.157084	0.580052	1.85097	2	Prupe.8G018400, Prupe.8G207300
GO:0003883	MF	CTP synthase activity	0.15659	0.580052	1.85412	1	Prupe.5G049900
GO:0007166	BP	cell surface receptor signaling pathway	0.167863	0.583066	1.78461	6	Prupe.1G205100, Prupe.3G181800, Prupe.4G093000, Prupe.4G094100, Prupe.4G094300, Prupe.8G149600
GO:0051259	BP	protein complex oligomerization	0.16757	0.583066	1.78635	3	Prupe.2G243800, Prupe.6G066300, Prupe.6G066500
GO:0032211	BP	negative regulation of telomere maintenance via telomerase	0.160297	0.583066	1.83073	1	Prupe.6G317700
GO:0042759	BP	long-chain fatty acid biosynthetic process	0.163067	0.583066	1.81359	1	Prupe.5G059300
GO:0080022	BP	primary root development	0.164929	0.583066	1.80224	1	Prupe.3G094600
GO:0051252	BP	regulation of RNA metabolic process	0.165561	0.583066	1.79841	1	Prupe.6G036700
GO:0006435	BP	threonyl-tRNA aminoacylation	0.166827	0.583066	1.7908	1	Prupe.8G074400
GO:0015709	BP	thiosulfate transport	0.170196	0.583066	1.77081	1	Prupe.8G067800
GO:0071422	BP	succinate transmembrane transport	0.170196	0.583066	1.77081	1	Prupe.8G067800
GO:0031090	CC	organelle membrane	0.161469	0.583066	1.82344	1	Prupe.3G044500
GO:0004527	MF	exonuclease activity	0.163584	0.583066	1.81043	3	Prupe.6G139300, Prupe.6G139800, Prupe.6G141200
GO:0017076	MF	purine nucleotide binding	0.15958	0.583066	1.83521	1	Prupe.6G211000
GO:0047746	MF	chlorophyllase activity	0.163849	0.583066	1.80881	1	Prupe.8G235600
GO:0008428	MF	ribonuclease inhibitor activity	0.165561	0.583066	1.79841	1	Prupe.6G036700
GO:0008948	MF	oxaloacetate decarboxylase activity	0.165561	0.583066	1.79841	1	Prupe.6G036700
GO:0047443	MF	4-hydroxy-4-methyl-2-oxoglutarate aldolase activity	0.165561	0.583066	1.79841	1	Prupe.6G036700
GO:0004829	MF	threonine-tRNA ligase activity	0.166827	0.583066	1.7908	1	Prupe.8G074400
GO:0015117	MF	thiosulfate transmembrane transporter activity	0.170196	0.583066	1.77081	1	Prupe.8G067800
GO:0015141	MF	succinate transmembrane transporter activity	0.170196	0.583066	1.77081	1	Prupe.8G067800
GO:0006811	BP	ion transport	0.170861	0.583128	1.76691	14	Prupe.1G400000, Prupe.1G400300, Prupe.1G400400, Prupe.2G030700, Prupe.2G105200, Prupe.4G092800, Prupe.4G117100, Prupe.6G005500, Prupe.6G007600, Prupe.6G066900, Prupe.7G106900, Prupe.7G184400, Prupe.8G097600, Prupe.8G097800
GO:0008115	MF	sarcosine oxidase activity	0.171529	0.583199	1.763	1	Prupe.1G458800
GO:0015672	BP	monovalent inorganic cation transport	0.176301	0.583996	1.73556	3	Prupe.1G209400, Prupe.1G346300, Prupe.4G283500
GO:0050801	BP	ion homeostasis	0.173736	0.583996	1.75022	1	Prupe.3G077900
GO:0046166	BP	glyceraldehyde-3-phosphate biosynthetic process	0.174666	0.583996	1.74488	1	Prupe.6G076500
GO:1990592	BP	protein K69-linked ufmylation	0.175121	0.583996	1.74228	1	Prupe.7G085600
GO:0004032	MF	alditol:NADP+ 1-oxidoreductase activity	0.175911	0.583996	1.73778	2	Prupe.1G244700, Prupe.8G083400
GO:1990610	MF	acetolactate synthase regulator activity	0.173182	0.583996	1.75341	1	Prupe.5G132200
GO:0004807	MF	triose-phosphate isomerase activity	0.174666	0.583996	1.74488	1	Prupe.6G076500
GO:0009853	BP	photorespiration	0.178741	0.589909	1.72182	2	Prupe.3G037200, Prupe.3G157200
GO:0034620	BP	cellular response to unfolded protein	0.18733	0.59334	1.67488	3	Prupe.2G234200, Prupe.2G234400, Prupe.6G079800
GO:0071482	BP	cellular response to light stimulus	0.181434	0.59334	1.70686	1	Prupe.1G443200
GO:0044375	BP	regulation of peroxisome size	0.188957	0.59334	1.66623	1	Prupe.2G276800
GO:0006369	BP	termination of RNA polymerase II transcription	0.189208	0.59334	1.66491	1	Prupe.1G518900
GO:0070212	BP	protein poly-ADP-ribosylation	0.190547	0.59334	1.65786	1	Prupe.3G262700
GO:0051974	BP	negative regulation of telomerase activity	0.190683	0.59334	1.65714	1	Prupe.6G317700
GO:0005886	CC	plasma membrane	0.184178	0.59334	1.69185	69	Prupe.1G157800, Prupe.1G205100, Prupe.1G218800, Prupe.1G257500, Prupe.1G278800, Prupe.1G400000, Prupe.1G400300, Prupe.1G400400, Prupe.1G444900, Prupe.1G469100, Prupe.1G500600, Prupe.1G510800, Prupe.1G515600, Prupe.1G558300, Prupe.2G030700, Prupe.2G105200, Prupe.2G301300, Prupe.3G065500, Prupe.3G077900, Prupe.3G181800, Prupe.3G214200, Prupe.3G226200, Prupe.3G226500, Prupe.3G226700, Prupe.4G031700,…
GO:0042788	CC	polysomal ribosome	0.182189	0.59334	1.70271	1	Prupe.8G023400
GO:1990879	CC	CST complex	0.184949	0.59334	1.68768	1	Prupe.6G317700
GO:0033180	CC	proton-transporting V-type ATPase, V1 domain	0.191634	0.59334	1.65217	1	Prupe.6G005500
GO:0051082	MF	unfolded protein binding	0.186902	0.59334	1.67717	9	Prupe.1G493700, Prupe.2G234200, Prupe.2G234400, Prupe.2G243800, Prupe.2G301300, Prupe.3G066800, Prupe.6G066300, Prupe.6G066500, Prupe.6G079800
GO:0031072	MF	heat shock protein binding	0.184273	0.59334	1.69134	4	Prupe.2G234200, Prupe.2G234400, Prupe.3G066800, Prupe.6G079800
GO:0016614	MF	oxidoreductase activity, acting on CH-OH group of donors	0.182895	0.59334	1.69884	3	Prupe.3G029300, Prupe.5G089100, Prupe.8G215200
GO:0015114	MF	phosphate ion transmembrane transporter activity	0.184489	0.59334	1.69016	1	Prupe.1G278800
GO:0004751	MF	ribose-5-phosphate isomerase activity	0.188624	0.59334	1.668	1	Prupe.4G102900
GO:1990404	MF	protein ADP-ribosylase activity	0.190547	0.59334	1.65786	1	Prupe.3G262700
GO:0010521	MF	telomerase inhibitor activity	0.190683	0.59334	1.65714	1	Prupe.6G317700
GO:0004000	MF	adenosine deaminase activity	0.191148	0.59334	1.65471	1	Prupe.2G164500
GO:0007029	BP	endoplasmic reticulum organization	0.19311	0.593805	1.64449	1	Prupe.2G279400
GO:0004794	MF	L-threonine ammonia-lyase activity	0.193516	0.593805	1.6424	1	Prupe.6G116600
GO:0004831	MF	tyrosine-tRNA ligase activity	0.193761	0.593805	1.64113	1	Prupe.5G096900
GO:0042742	BP	defense response to bacterium	0.199353	0.595976	1.61268	7	Prupe.1G157800, Prupe.3G094600, Prupe.4G136700, Prupe.4G241200, Prupe.6G261500, Prupe.6G343900, Prupe.8G235600
GO:0009686	BP	gibberellin biosynthetic process	0.202903	0.595976	1.59503	2	Prupe.1G535600, Prupe.4G238400
GO:0006857	BP	oligopeptide transport	0.203068	0.595976	1.59421	2	Prupe.6G091900, Prupe.7G241900
GO:0044210	BP	'de novo' CTP biosynthetic process	0.199158	0.595976	1.61366	1	Prupe.5G049900
GO:0015729	BP	oxaloacetate transport	0.19962	0.595976	1.61134	1	Prupe.8G067800
GO:1902356	BP	oxaloacetate(2-) transmembrane transport	0.19962	0.595976	1.61134	1	Prupe.8G067800
GO:0031935	BP	regulation of chromatin silencing	0.202634	0.595976	1.59635	1	Prupe.8G049400
GO:0016298	MF	lipase activity	0.202801	0.595976	1.59553	3	Prupe.3G032900, Prupe.3G033500, Prupe.3G033600
GO:0048038	MF	quinone binding	0.19598	0.595976	1.62974	2	Prupe.5G078700, Prupe.6G157800
GO:0003887	MF	DNA-directed DNA polymerase activity	0.200105	0.595976	1.60891	2	Prupe.1G328900, Prupe.6G025200
GO:0015131	MF	oxaloacetate transmembrane transporter activity	0.19962	0.595976	1.61134	1	Prupe.8G067800
GO:0004566	MF	beta-glucuronidase activity	0.199815	0.595976	1.61037	1	Prupe.1G483900
GO:0016174	MF	NAD(P)H oxidase (H(2)O(2)-forming activity	0.20113	0.595976	1.6038	1	Prupe.6G088800
GO:0016998	BP	cell wall macromolecule catabolic process	0.205256	0.596774	1.5835	2	Prupe.1G204000, Prupe.1G205600
GO:0030705	BP	cytoskeleton-dependent intracellular transport	0.20488	0.596774	1.58533	1	Prupe.6G000800
GO:0010230	BP	alternative respiration	0.207314	0.596774	1.57352	1	Prupe.5G018700
GO:0016891	MF	endoribonuclease activity, producing 5'-phosphomonoesters	0.207205	0.596774	1.57405	1	Prupe.8G202000
GO:0009916	MF	alternative oxidase activity	0.207314	0.596774	1.57352	1	Prupe.5G018700
GO:0102721	MF	ubiquinol:oxygen oxidoreductase activity	0.207314	0.596774	1.57352	1	Prupe.5G018700
GO:0000822	MF	inositol hexakisphosphate binding	0.2084	0.597989	1.56829	1	Prupe.1G278800
GO:0004386	MF	helicase activity	0.210427	0.601887	1.55862	7	Prupe.1G200900, Prupe.1G368500, Prupe.1G422500, Prupe.2G078200, Prupe.2G078300, Prupe.8G103900, Prupe.8G202000
GO:0003841	MF	1-acylglycerol-3-phosphate O-acyltransferase activity	0.211239	0.602297	1.55477	1	Prupe.4G245900
GO:0006541	BP	glutamine metabolic process	0.213188	0.603015	1.54558	2	Prupe.1G316200, Prupe.5G049900
GO:0060236	BP	regulation of mitotic spindle organization	0.214332	0.603015	1.54023	1	Prupe.2G283500
GO:0140021	BP	mitochondrial ADP transmembrane transport	0.214837	0.603015	1.53788	1	Prupe.4G244400
GO:1990544	BP	mitochondrial ATP transmembrane transport	0.214837	0.603015	1.53788	1	Prupe.4G244400
GO:0070847	CC	core mediator complex	0.214229	0.603015	1.54071	2	Prupe.1G181600, Prupe.1G518900
GO:0006979	BP	response to oxidative stress	0.218433	0.607434	1.52127	9	Prupe.2G320000, Prupe.4G276800, Prupe.5G230200, Prupe.6G013400, Prupe.6G013500, Prupe.6G044700, Prupe.6G044800, Prupe.6G242200, Prupe.8G116400
GO:0015267	MF	channel activity	0.217431	0.607434	1.52587	3	Prupe.1G449500, Prupe.3G009400, Prupe.3G191000
GO:0003917	MF	DNA topoisomerase type I (single strand cut, ATP-independent) activity	0.217764	0.607434	1.52434	1	Prupe.1G146000
GO:0050832	BP	defense response to fungus	0.235023	0.610689	1.44807	6	Prupe.1G225100, Prupe.1G341500, Prupe.1G341600, Prupe.6G343900, Prupe.8G071600, Prupe.8G235600
GO:0006885	BP	regulation of pH	0.230705	0.610689	1.46662	3	Prupe.1G209400, Prupe.1G346300, Prupe.4G283500
GO:0090503	BP	RNA phosphodiester bond hydrolysis, exonucleolytic	0.232483	0.610689	1.45894	3	Prupe.6G139300, Prupe.6G139800, Prupe.6G141200
GO:0050821	BP	protein stabilization	0.2334	0.610689	1.455	2	Prupe.2G301300, Prupe.6G035200
GO:0019856	BP	pyrimidine nucleobase biosynthetic process	0.221531	0.610689	1.50719	1	Prupe.5G049900
GO:0042335	BP	cuticle development	0.222033	0.610689	1.50493	1	Prupe.1G225100
GO:0006567	BP	threonine catabolic process	0.222485	0.610689	1.5029	1	Prupe.6G116600
GO:0071423	BP	malate transmembrane transport	0.225762	0.610689	1.48828	1	Prupe.8G067800
GO:0010162	BP	seed dormancy process	0.227114	0.610689	1.4823	1	Prupe.4G140900
GO:0090307	BP	mitotic spindle assembly	0.228518	0.610689	1.47614	1	Prupe.2G283500
GO:0010025	BP	wax biosynthetic process	0.230103	0.610689	1.46923	1	Prupe.5G059300
GO:2000142	BP	regulation of DNA-templated transcription, initiation	0.231598	0.610689	1.46275	1	Prupe.1G443200
GO:0019563	BP	glycerol catabolic process	0.232791	0.610689	1.45762	1	Prupe.6G076500
GO:0007219	BP	Notch signaling pathway	0.235871	0.610689	1.44447	1	Prupe.6G167600
GO:0009986	CC	cell surface	0.230343	0.610689	1.46819	1	Prupe.2G301300
GO:0000930	CC	gamma-tubulin complex	0.235532	0.610689	1.44591	1	Prupe.8G052800
GO:0031625	MF	ubiquitin protein ligase binding	0.224597	0.610689	1.49345	5	Prupe.1G488000, Prupe.1G488300, Prupe.4G195000, Prupe.4G195400, Prupe.4G195600
GO:0004568	MF	chitinase activity	0.227851	0.610689	1.47907	3	Prupe.1G204000, Prupe.1G205600, Prupe.2G179300
GO:0042802	MF	identical protein binding	0.232065	0.610689	1.46074	3	Prupe.2G276800, Prupe.3G094600, Prupe.5G049900
GO:0004535	MF	poly(A)-specific ribonuclease activity	0.224461	0.610689	1.49405	2	Prupe.6G139300, Prupe.6G139800
GO:0004089	MF	carbonate dehydratase activity	0.231381	0.610689	1.46369	2	Prupe.6G080400, Prupe.8G025400
GO:0009927	MF	histidine phosphotransfer kinase activity	0.234659	0.610689	1.44962	2	Prupe.3G059200, Prupe.6G123100
GO:0016987	MF	sigma factor activity	0.231598	0.610689	1.46275	1	Prupe.1G443200
GO:0017022	MF	myosin binding	0.23168	0.610689	1.4624	1	Prupe.8G128800
GO:0000463	BP	maturation of LSU-rRNA from tricistronic rRNA transcript (SSU-rRNA, 5.8S rRNA, LSU-rRNA)	0.238925	0.610695	1.43161	2	Prupe.8G015200, Prupe.8G015700
GO:0006490	BP	oligosaccharide-lipid intermediate biosynthetic process	0.238369	0.610695	1.43394	1	Prupe.2G117600
GO:0016102	BP	diterpenoid biosynthetic process	0.239739	0.610695	1.4282	1	Prupe.4G238400
GO:0042132	MF	fructose 1,6-bisphosphate 1-phosphatase activity	0.238551	0.610695	1.43317	1	Prupe.4G136700
GO:0070037	MF	rRNA (pseudouridine) methyltransferase activity	0.238994	0.610695	1.43132	1	Prupe.1G568900
GO:0016810	MF	hydrolase activity, acting on carbon-nitrogen (but not peptide) bonds	0.23994	0.610695	1.42737	1	Prupe.4G264000
GO:0051753	MF	mannan synthase activity	0.24139	0.611437	1.42134	2	Prupe.3G214200, Prupe.6G024900
GO:0015140	MF	malate transmembrane transporter activity	0.241589	0.611437	1.42052	1	Prupe.8G067800
GO:0008251	MF	tRNA-specific adenosine deaminase activity	0.242772	0.61271	1.41563	1	Prupe.2G164500
GO:0140312	MF	cargo adaptor activity	0.244283	0.614803	1.40943	1	Prupe.2G055800
GO:0038023	MF	signaling receptor activity	0.247461	0.620642	1.3965	6	Prupe.1G400000, Prupe.1G400300, Prupe.1G400400, Prupe.2G105200, Prupe.7G106900, Prupe.7G184400
GO:0050664	MF	oxidoreductase activity, acting on NAD(P)H, oxygen as acceptor	0.247981	0.620642	1.3944	1	Prupe.6G088800
GO:0009536	CC	plastid	0.248872	0.621146	1.39082	13	Prupe.1G225700, Prupe.1G397100, Prupe.1G397200, Prupe.1G497100, Prupe.2G269900, Prupe.3G157200, Prupe.3G174600, Prupe.4G076200, Prupe.4G190500, Prupe.5G008000, Prupe.6G035200, Prupe.6G224400, Prupe.8G142700
GO:0006336	BP	DNA replication-independent nucleosome assembly	0.251316	0.625513	1.38104	1	Prupe.8G049400
GO:0032259	BP	methylation	0.253905	0.625572	1.37079	13	Prupe.1G227100, Prupe.2G107200, Prupe.3G119100, Prupe.3G119800, Prupe.3G120400, Prupe.3G129200, Prupe.3G129400, Prupe.3G129800, Prupe.3G235500, Prupe.7G060100, Prupe.8G092900, Prupe.8G093100, Prupe.8G171100
GO:0051787	MF	misfolded protein binding	0.253964	0.625572	1.37056	3	Prupe.2G234200, Prupe.2G234400, Prupe.6G079800
GO:0008878	MF	glucose-1-phosphate adenylyltransferase activity	0.253439	0.625572	1.37263	1	Prupe.8G093400
GO:0004084	MF	branched-chain-amino-acid transaminase activity	0.254117	0.625572	1.36996	1	Prupe.1G416900
GO:0071949	MF	FAD binding	0.256342	0.627621	1.36124	6	Prupe.1G171200, Prupe.1G462400, Prupe.4G096900, Prupe.4G099400, Prupe.7G051400, Prupe.8G046000
GO:0046873	MF	metal ion transmembrane transporter activity	0.25571	0.627621	1.36371	3	Prupe.1G492500, Prupe.4G117100, Prupe.4G241000
GO:0016709	MF	oxidoreductase activity, acting on paired donors, with incorporation or reduction of molecular oxygen, NAD(P)H as one donor, and incorporation of one atom of oxygen	0.260029	0.628226	1.34696	4	Prupe.1G428400, Prupe.1G428700, Prupe.6G007200, Prupe.6G046500
GO:0008483	MF	transaminase activity	0.259015	0.628226	1.35087	3	Prupe.3G094600, Prupe.3G133000, Prupe.8G041100
GO:0003856	MF	3-dehydroquinate synthase activity	0.258159	0.628226	1.35418	1	Prupe.8G012300
GO:0003954	MF	NADH dehydrogenase activity	0.258973	0.628226	1.35103	1	Prupe.8G025300
GO:0004365	MF	glyceraldehyde-3-phosphate dehydrogenase (NAD+) (phosphorylating) activity	0.260076	0.628226	1.34678	1	Prupe.5G008000
GO:0030015	CC	CCR4-NOT core complex	0.261417	0.629682	1.34164	2	Prupe.6G139300, Prupe.6G139800
GO:0003984	MF	acetolactate synthase activity	0.262076	0.629682	1.33912	1	Prupe.5G132200
GO:0006325	BP	chromatin organization	0.265652	0.629875	1.32557	3	Prupe.4G272300, Prupe.7G060100, Prupe.8G049400
GO:0009535	CC	chloroplast thylakoid membrane	0.264578	0.629875	1.32962	12	Prupe.1G225700, Prupe.1G497100, Prupe.2G198900, Prupe.2G269900, Prupe.3G174600, Prupe.4G076200, Prupe.4G190500, Prupe.4G250100, Prupe.6G035200, Prupe.6G259200, Prupe.7G102300, Prupe.8G142700
GO:0048471	CC	perinuclear region of cytoplasm	0.263004	0.629875	1.33559	1	Prupe.2G301300
GO:0008168	MF	methyltransferase activity	0.264333	0.629875	1.33055	15	Prupe.1G227100, Prupe.1G568900, Prupe.2G107200, Prupe.3G119100, Prupe.3G119800, Prupe.3G120400, Prupe.3G129200, Prupe.3G129400, Prupe.3G129800, Prupe.3G235500, Prupe.3G295700, Prupe.7G060100, Prupe.8G092900, Prupe.8G093100, Prupe.8G171100
GO:0043424	MF	protein histidine kinase binding	0.265479	0.629875	1.32622	2	Prupe.3G059200, Prupe.6G123100
GO:0030124	CC	AP-4 adaptor complex	0.266506	0.630241	1.32236	1	Prupe.2G055800
GO:0051085	BP	chaperone cofactor-dependent protein refolding	0.297774	0.631812	1.21142	4	Prupe.1G493700, Prupe.2G234200, Prupe.2G234400, Prupe.6G079800
GO:0006418	BP	tRNA aminoacylation for protein translation	0.279656	0.631812	1.27419	3	Prupe.5G096900, Prupe.8G045400, Prupe.8G074400
GO:0042542	BP	response to hydrogen peroxide	0.282536	0.631812	1.26395	3	Prupe.2G243800, Prupe.6G066300, Prupe.6G066500
GO:0009755	BP	hormone-mediated signaling pathway	0.29414	0.631812	1.2237	3	Prupe.1G515600, Prupe.8G217600, Prupe.8G226900
GO:0034605	BP	cellular response to heat	0.273334	0.631812	1.29706	2	Prupe.2G301300, Prupe.7G206900
GO:0043928	BP	exonucleolytic catabolism of deadenylated mRNA	0.283004	0.631812	1.26229	2	Prupe.6G139300, Prupe.6G139800
GO:0071577	BP	zinc ion transmembrane transport	0.29785	0.631812	1.21116	2	Prupe.4G117100, Prupe.4G241000
GO:0015996	BP	chlorophyll catabolic process	0.26862	0.631812	1.31446	1	Prupe.8G235600
GO:0048856	BP	anatomical structure development	0.270762	0.631812	1.30652	1	Prupe.6G023800
GO:0016320	BP	endoplasmic reticulum membrane fusion	0.27178	0.631812	1.30276	1	Prupe.4G106500
GO:0009785	BP	blue light signaling pathway	0.274785	0.631812	1.29177	1	Prupe.6G129600
GO:0009052	BP	pentose-phosphate shunt, non-oxidative branch	0.280317	0.631812	1.27183	1	Prupe.4G102900
GO:0032147	BP	activation of protein kinase activity	0.282851	0.631812	1.26283	1	Prupe.2G283500
GO:0007020	BP	microtubule nucleation	0.2833	0.631812	1.26125	1	Prupe.8G052800
GO:0006820	BP	anion transport	0.286453	0.631812	1.25018	1	Prupe.3G077900
GO:0009099	BP	valine biosynthetic process	0.28684	0.631812	1.24883	1	Prupe.5G132200
GO:0042819	BP	vitamin B6 biosynthetic process	0.287748	0.631812	1.24567	1	Prupe.6G216600
GO:0016559	BP	peroxisome fission	0.290815	0.631812	1.23507	1	Prupe.2G276800
GO:0048235	BP	pollen sperm cell differentiation	0.291185	0.631812	1.2338	1	Prupe.1G307600
GO:0070574	BP	cadmium ion transmembrane transport	0.291624	0.631812	1.23229	1	Prupe.1G492500
GO:0048658	BP	anther wall tapetum development	0.295862	0.631812	1.21786	1	Prupe.1G519000
GO:0009308	BP	amine metabolic process	0.300128	0.631812	1.20354	1	Prupe.5G078700
GO:0071013	CC	catalytic step 2 spliceosome	0.300011	0.631812	1.20394	4	Prupe.1G368500, Prupe.1G422500, Prupe.2G078200, Prupe.2G078300
GO:0000943	CC	retrotransposon nucleocapsid	0.270889	0.631812	1.30605	2	Prupe.1G091500, Prupe.3G026300
GO:0005819	CC	spindle	0.290039	0.631812	1.23774	2	Prupe.2G283500, Prupe.8G052800
GO:0005811	CC	lipid droplet	0.298882	0.631812	1.20771	2	Prupe.3G026200, Prupe.3G026400
GO:0048500	CC	signal recognition particle	0.272062	0.631812	1.30173	1	Prupe.8G050200
GO:0005854	CC	nascent polypeptide-associated complex	0.278912	0.631812	1.27686	1	Prupe.8G023400
GO:0009543	CC	chloroplast thylakoid lumen	0.295259	0.631812	1.2199	1	Prupe.3G235100
GO:0071007	CC	U2-type catalytic step 2 spliceosome	0.300111	0.631812	1.2036	1	Prupe.6G139700
GO:0015299	MF	solute:proton antiporter activity	0.299506	0.631812	1.20562	3	Prupe.1G209400, Prupe.1G346300, Prupe.4G283500
GO:0004298	MF	threonine-type endopeptidase activity	0.276817	0.631812	1.2844	2	Prupe.3G183900, Prupe.8G034000
GO:0030570	MF	pectate lyase activity	0.286651	0.631812	1.24949	2	Prupe.1G565500, Prupe.5G245600
GO:0005385	MF	zinc ion transmembrane transporter activity	0.29785	0.631812	1.21116	2	Prupe.4G117100, Prupe.4G241000
GO:0016760	MF	cellulose synthase (UDP-forming) activity	0.299705	0.631812	1.20496	2	Prupe.3G214200, Prupe.6G024900
GO:0016984	MF	ribulose-bisphosphate carboxylase activity	0.275011	0.631812	1.29094	1	Prupe.3G157200
GO:0005471	MF	ATP:ADP antiporter activity	0.276439	0.631812	1.28577	1	Prupe.4G244400
GO:0030295	MF	protein kinase activator activity	0.282851	0.631812	1.26283	1	Prupe.2G283500
GO:0016157	MF	sucrose synthase activity	0.286297	0.631812	1.25073	1	Prupe.1G483200
GO:0045544	MF	gibberellin 20-oxidase activity	0.289308	0.631812	1.24026	1	Prupe.1G535600
GO:0015086	MF	cadmium ion transmembrane transporter activity	0.291624	0.631812	1.23229	1	Prupe.1G492500
GO:0047631	MF	ADP-ribose diphosphatase activity	0.292958	0.631812	1.22772	1	Prupe.5G062300
GO:0008131	MF	primary amine oxidase activity	0.300128	0.631812	1.20354	1	Prupe.5G078700
GO:0052593	MF	tryptamine:oxygen oxidoreductase (deaminating) activity	0.300128	0.631812	1.20354	1	Prupe.5G078700
GO:0052594	MF	aminoacetone:oxygen oxidoreductase(deaminating) activity	0.300128	0.631812	1.20354	1	Prupe.5G078700
GO:0052595	MF	aliphatic-amine oxidase activity	0.300128	0.631812	1.20354	1	Prupe.5G078700
GO:0052596	MF	phenethylamine:oxygen oxidoreductase (deaminating) activity	0.300128	0.631812	1.20354	1	Prupe.5G078700
GO:0009408	BP	response to heat	0.301105	0.63239	1.2003	4	Prupe.2G243800, Prupe.4G140900, Prupe.6G066300, Prupe.6G066500
GO:0008356	BP	asymmetric cell division	0.301881	0.632545	1.19772	1	Prupe.1G393300
GO:0003916	MF	DNA topoisomerase activity	0.302695	0.63278	1.19503	1	Prupe.1G146000
GO:0006898	BP	receptor-mediated endocytosis	0.306008	0.636351	1.18414	1	Prupe.2G055800
GO:0019253	BP	reductive pentose-phosphate cycle	0.307228	0.636351	1.18016	1	Prupe.3G157200
GO:0032041	MF	NAD-dependent histone deacetylase activity (H3-K14 specific)	0.305781	0.636351	1.18489	1	Prupe.4G272300
GO:0016655	MF	oxidoreductase activity, acting on NAD(P)H, quinone or similar compound as acceptor	0.306616	0.636351	1.18216	1	Prupe.6G157800
GO:0009833	BP	plant-type primary cell wall biogenesis	0.310489	0.640162	1.16961	2	Prupe.3G214200, Prupe.6G024900
GO:0008121	MF	ubiquinol-cytochrome-c reductase activity	0.310457	0.640162	1.16971	1	Prupe.8G028000
GO:0006241	BP	CTP biosynthetic process	0.31157	0.640923	1.16613	1	Prupe.5G049900
GO:0009505	CC	plant-type cell wall	0.313207	0.641363	1.16089	5	Prupe.1G225100, Prupe.1G483900, Prupe.2G320000, Prupe.4G276800, Prupe.6G128500
GO:0072686	CC	mitotic spindle	0.312762	0.641363	1.16231	1	Prupe.2G283500
GO:0045156	MF	electron transporter, transferring electrons within the cyclic electron transport pathway of photosynthesis activity	0.314196	0.641928	1.15774	1	Prupe.1G277200
GO:0005978	BP	glycogen biosynthetic process	0.315862	0.642528	1.15245	1	Prupe.8G093400
GO:0034553	BP	mitochondrial respiratory chain complex II assembly	0.315916	0.642528	1.15228	1	Prupe.8G008800
GO:0035529	MF	NADH pyrophosphatase activity	0.318146	0.645607	1.14525	1	Prupe.5G062300
GO:0004332	MF	fructose-bisphosphate aldolase activity	0.319201	0.646293	1.14193	1	Prupe.7G165400
GO:0032436	BP	positive regulation of proteasomal ubiquitin-dependent protein catabolic process	0.320867	0.646758	1.13673	2	Prupe.6G094500, Prupe.6G115700
GO:0046593	MF	mandelonitrile lyase activity	0.320422	0.646758	1.13812	2	Prupe.5G089100, Prupe.8G215200
GO:0006032	BP	chitin catabolic process	0.322445	0.646938	1.13182	2	Prupe.1G204000, Prupe.1G205600
GO:1902025	BP	nitrate import	0.32311	0.646938	1.12976	1	Prupe.1G440600
GO:0042162	MF	telomeric DNA binding	0.322859	0.646938	1.13054	1	Prupe.6G317700
GO:0005654	CC	nucleoplasm	0.325042	0.649364	1.1238	3	Prupe.6G014700, Prupe.8G015200, Prupe.8G015700
GO:0070932	BP	histone H3 deacetylation	0.326028	0.649626	1.12077	1	Prupe.4G272300
GO:0034457	CC	Mpp10 complex	0.326616	0.649626	1.11897	1	Prupe.8G084800
GO:0017183	BP	peptidyl-diphthamide biosynthetic process from peptidyl-histidine	0.327899	0.650743	1.11505	1	Prupe.8G113200
GO:0032991	CC	protein-containing complex	0.329556	0.652593	1.11001	1	Prupe.2G301300
GO:0050660	MF	flavin adenine dinucleotide binding	0.331563	0.655128	1.10394	8	Prupe.1G171200, Prupe.4G096900, Prupe.4G099400, Prupe.4G157300, Prupe.5G089100, Prupe.7G051400, Prupe.8G177000, Prupe.8G215200
GO:0030244	BP	cellulose biosynthetic process	0.333401	0.655956	1.09841	2	Prupe.3G214200, Prupe.6G024900
GO:0015833	BP	peptide transport	0.333438	0.655956	1.0983	1	Prupe.6G026300
GO:0042026	BP	protein refolding	0.340434	0.65941	1.07753	3	Prupe.2G234200, Prupe.2G234400, Prupe.6G079800
GO:0016226	BP	iron-sulfur cluster assembly	0.342274	0.65941	1.07214	2	Prupe.6G008100, Prupe.8G036300
GO:0045087	BP	innate immune response	0.341045	0.65941	1.07574	1	Prupe.8G048500
GO:0016024	BP	CDP-diacylglycerol biosynthetic process	0.341196	0.65941	1.0753	1	Prupe.4G245900
GO:0042823	BP	pyridoxal phosphate biosynthetic process	0.342418	0.65941	1.07172	1	Prupe.6G216600
GO:0019773	CC	proteasome core complex, alpha-subunit complex	0.336283	0.65941	1.0898	1	Prupe.3G183900
GO:0005663	CC	DNA replication factor C complex	0.341993	0.65941	1.07297	1	Prupe.4G268900
GO:0005216	MF	ion channel activity	0.338821	0.65941	1.08228	3	Prupe.4G092800, Prupe.8G097600, Prupe.8G097800
GO:0016985	MF	mannan endo-1,4-beta-mannosidase activity	0.340563	0.65941	1.07715	1	Prupe.6G181100
GO:0005179	MF	hormone activity	0.342819	0.65941	1.07055	1	Prupe.1G440600
GO:0005227	MF	calcium activated cation channel activity	0.343244	0.65941	1.06931	1	Prupe.2G030700
GO:0052324	BP	plant-type cell wall cellulose biosynthetic process	0.344983	0.661339	1.06426	1	Prupe.1G575900
GO:0045116	BP	protein neddylation	0.346237	0.662334	1.06063	1	Prupe.1G383000
GO:0009736	BP	cytokinin-activated signaling pathway	0.355669	0.666663	1.03375	2	Prupe.3G059200, Prupe.6G123100
GO:0009269	BP	response to desiccation	0.352951	0.666663	1.04143	1	Prupe.6G132700
GO:0007052	BP	mitotic spindle organization	0.353804	0.666663	1.03901	1	Prupe.8G052800
GO:0051923	BP	sulfation	0.356311	0.666663	1.03195	1	Prupe.2G043800
GO:0010218	BP	response to far red light	0.356639	0.666663	1.03103	1	Prupe.8G142700
GO:0030014	CC	CCR4-NOT complex	0.352279	0.666663	1.04333	2	Prupe.6G139300, Prupe.6G139800
GO:0017119	CC	Golgi transport complex	0.35648	0.666663	1.03148	1	Prupe.8G015800
GO:0016757	MF	transferase activity, transferring glycosyl groups	0.35121	0.666663	1.04637	25	Prupe.1G053300, Prupe.1G166100, Prupe.1G179000, Prupe.1G179400, Prupe.1G458200, Prupe.1G483200, Prupe.1G519500, Prupe.1G520100, Prupe.2G085300, Prupe.2G117600, Prupe.3G184400, Prupe.3G184700, Prupe.3G189100, Prupe.3G189300, Prupe.3G214200, Prupe.3G282700, Prupe.6G024900, Prupe.6G186000, Prupe.6G190600, Prupe.6G203800, Prupe.6G211600, Prupe.6G233500, Prupe.6G266900, Prupe.8G063500, Prupe.8G135700
GO:0031624	MF	ubiquitin conjugating enzyme binding	0.355821	0.666663	1.03333	2	Prupe.6G094500, Prupe.6G115700
GO:0003950	MF	NAD+ ADP-ribosyltransferase activity	0.351404	0.666663	1.04582	1	Prupe.3G262700
GO:0008574	MF	ATP-dependent microtubule motor activity, plus-end-directed	0.355605	0.666663	1.03394	1	Prupe.6G000800
GO:0000445	CC	THO complex part of transcription export complex	0.358341	0.668458	1.02627	1	Prupe.8G026600
GO:0097428	BP	protein maturation by iron-sulfur cluster transfer	0.364623	0.677371	1.00889	1	Prupe.6G008100
GO:0004407	MF	histone deacetylase activity	0.36453	0.677371	1.00915	1	Prupe.4G272300
GO:0005880	CC	nuclear microtubule	0.36818	0.682572	0.999184	1	Prupe.2G283500
GO:0006526	BP	arginine biosynthetic process	0.369891	0.684337	0.994546	1	Prupe.3G094600
GO:0000956	BP	nuclear-transcribed mRNA catabolic process	0.372642	0.686094	0.987136	1	Prupe.6G141200
GO:0031122	BP	cytoplasmic microtubule organization	0.37336	0.686094	0.985212	1	Prupe.8G052800
GO:0005985	BP	sucrose metabolic process	0.374674	0.686094	0.9817	1	Prupe.1G483200
GO:0035672	BP	oligopeptide transmembrane transport	0.375488	0.686094	0.97953	1	Prupe.6G026300
GO:0030687	CC	preribosome, large subunit precursor	0.37627	0.686094	0.977448	2	Prupe.8G015200, Prupe.8G015700
GO:0004553	MF	hydrolase activity, hydrolyzing O-glycosyl compounds	0.372817	0.686094	0.986669	14	Prupe.1G088600, Prupe.1G088900, Prupe.2G092900, Prupe.2G179300, Prupe.2G227600, Prupe.4G255600, Prupe.5G106800, Prupe.6G019000, Prupe.6G088400, Prupe.6G136300, Prupe.6G156300, Prupe.6G156400, Prupe.6G156500, Prupe.6G181100
GO:0004812	MF	aminoacyl-tRNA ligase activity	0.376933	0.686094	0.975688	3	Prupe.5G096900, Prupe.8G045400, Prupe.8G074400
GO:0035673	MF	oligopeptide transmembrane transporter activity	0.375488	0.686094	0.97953	1	Prupe.6G026300
GO:0005750	CC	mitochondrial respiratory chain complex III	0.378174	0.686966	0.9724	1	Prupe.8G028000
GO:0030976	MF	thiamine pyrophosphate binding	0.380185	0.689228	0.967098	1	Prupe.6G280700
GO:0015977	BP	carbon fixation	0.383189	0.69328	0.959227	1	Prupe.3G157200
GO:0006000	BP	fructose metabolic process	0.38453	0.693808	0.955734	1	Prupe.4G136700
GO:0006265	BP	DNA topological change	0.385021	0.693808	0.954458	1	Prupe.1G146000
GO:0007163	BP	establishment or maintenance of cell polarity	0.387008	0.695997	0.949309	1	Prupe.6G181100
GO:0070475	BP	rRNA base methylation	0.390453	0.700794	0.940447	2	Prupe.1G568900, Prupe.3G193200
GO:0016868	MF	intramolecular transferase activity, phosphotransferases	0.391926	0.702038	0.936683	1	Prupe.6G119800
GO:0009231	BP	riboflavin biosynthetic process	0.393759	0.703035	0.932016	1	Prupe.6G085600
GO:0009637	BP	response to blue light	0.396719	0.703035	0.924527	1	Prupe.8G142700
GO:0102336	MF	3-oxo-arachidoyl-CoA synthase activity	0.397944	0.703035	0.921443	2	Prupe.1G310500, Prupe.1G401500
GO:0102337	MF	3-oxo-cerotoyl-CoA synthase activity	0.397944	0.703035	0.921443	2	Prupe.1G310500, Prupe.1G401500
GO:0102338	MF	3-oxo-lignoceronyl-CoA synthase activity	0.397944	0.703035	0.921443	2	Prupe.1G310500, Prupe.1G401500
GO:0102756	MF	very-long-chain 3-ketoacyl-CoA synthase activity	0.397944	0.703035	0.921443	2	Prupe.1G310500, Prupe.1G401500
GO:0044389	MF	ubiquitin-like protein ligase binding	0.39627	0.703035	0.925659	1	Prupe.4G277000
GO:1901371	BP	regulation of leaf morphogenesis	0.399183	0.703842	0.918337	1	Prupe.1G440600
GO:0005758	CC	mitochondrial intermembrane space	0.400081	0.704049	0.916088	1	Prupe.8G036300
GO:0031492	MF	nucleosomal DNA binding	0.401811	0.705715	0.911773	1	Prupe.5G053600
GO:0045944	BP	positive regulation of transcription by RNA polymerase II	0.407282	0.705999	0.898249	7	Prupe.1G223600, Prupe.1G371300, Prupe.1G531100, Prupe.1G531400, Prupe.2G047900, Prupe.3G197300, Prupe.8G069300
GO:0007178	BP	transmembrane receptor protein serine/threonine kinase signaling pathway	0.409808	0.705999	0.892066	3	Prupe.1G157800, Prupe.4G241200, Prupe.6G261500
GO:0006272	BP	leading strand elongation	0.403903	0.705999	0.90658	1	Prupe.6G130500
GO:0016575	BP	histone deacetylation	0.404953	0.705999	0.903984	1	Prupe.4G272300
GO:0007094	BP	mitotic spindle assembly checkpoint	0.405848	0.705999	0.901776	1	Prupe.1G281000
GO:0000245	BP	spliceosomal complex assembly	0.408555	0.705999	0.895129	1	Prupe.6G139700
GO:0005770	CC	late endosome	0.404291	0.705999	0.905619	1	Prupe.1G209400
GO:0005787	CC	signal peptidase complex	0.409684	0.705999	0.89237	1	Prupe.1G519000
GO:0004177	MF	aminopeptidase activity	0.406686	0.705999	0.899714	1	Prupe.3G044500
GO:0008146	MF	sulfotransferase activity	0.407807	0.705999	0.896962	1	Prupe.2G043800
GO:0016846	MF	carbon-sulfur lyase activity	0.41166	0.707821	0.887558	1	Prupe.8G041100
GO:0003955	MF	NAD(P)H dehydrogenase (quinone) activity	0.412437	0.707821	0.885671	1	Prupe.2G038000
GO:0006122	BP	mitochondrial electron transport, ubiquinol to cytochrome c	0.414072	0.709276	0.881715	1	Prupe.8G028000
GO:0045892	BP	negative regulation of transcription, DNA-templated	0.43083	0.71416	0.842042	4	Prupe.1G381100, Prupe.6G139400, Prupe.6G167600, Prupe.8G049400
GO:0046274	BP	lignin catabolic process	0.430375	0.71416	0.843097	2	Prupe.8G046800, Prupe.8G047500
GO:0016584	BP	nucleosome positioning	0.419377	0.71416	0.868985	1	Prupe.5G053600
GO:0071704	BP	organic substance metabolic process	0.420211	0.71416	0.866999	1	Prupe.6G181100
GO:0009767	BP	photosynthetic electron transport chain	0.421346	0.71416	0.8643	1	Prupe.1G277200
GO:0045047	BP	protein targeting to ER	0.423308	0.71416	0.859655	1	Prupe.4G272800
GO:0007031	BP	peroxisome organization	0.425501	0.71416	0.854488	1	Prupe.2G276800
GO:0042138	BP	meiotic DNA double-strand break formation	0.426637	0.71416	0.851822	1	Prupe.1G172400
GO:0030042	BP	actin filament depolymerization	0.428973	0.71416	0.846362	1	Prupe.2G165300
GO:2000280	BP	regulation of root development	0.43002	0.71416	0.843925	1	Prupe.1G440600
GO:0008283	BP	cell population proliferation	0.431191	0.71416	0.841204	1	Prupe.6G217500
GO:0015629	CC	actin cytoskeleton	0.424997	0.71416	0.855673	2	Prupe.2G165300, Prupe.6G181100
GO:0005779	CC	integral component of peroxisomal membrane	0.424856	0.71416	0.856006	1	Prupe.2G276800
GO:0071014	CC	post-mRNA release spliceosomal complex	0.425747	0.71416	0.853911	1	Prupe.6G139700
GO:0031011	CC	Ino80 complex	0.428602	0.71416	0.847225	1	Prupe.6G245300
GO:0000776	CC	kinetochore	0.43025	0.71416	0.84339	1	Prupe.1G281000
GO:0004675	MF	transmembrane receptor protein serine/threonine kinase activity	0.425772	0.71416	0.85385	3	Prupe.1G157800, Prupe.4G241200, Prupe.6G261500
GO:0052716	MF	hydroquinone:oxygen oxidoreductase activity	0.430375	0.71416	0.843097	2	Prupe.8G046800, Prupe.8G047500
GO:0006614	BP	SRP-dependent cotranslational protein targeting to membrane	0.432608	0.715192	0.837924	1	Prupe.8G050200
GO:0042578	MF	phosphoric ester hydrolase activity	0.434045	0.716254	0.834607	1	Prupe.4G136700
GO:0009773	BP	photosynthetic electron transport in photosystem I	0.438099	0.721622	0.82531	1	Prupe.6G035200
GO:0002229	BP	defense response to oomycetes	0.441282	0.722555	0.818071	3	Prupe.1G157800, Prupe.4G241200, Prupe.6G261500
GO:0097502	BP	mannosylation	0.443216	0.722555	0.813699	2	Prupe.3G214200, Prupe.6G024900
GO:0006002	BP	fructose 6-phosphate metabolic process	0.441398	0.722555	0.817809	1	Prupe.4G136700
GO:0007059	BP	chromosome segregation	0.444115	0.722555	0.811672	1	Prupe.1G146000
GO:0051536	MF	iron-sulfur cluster binding	0.442964	0.722555	0.814268	5	Prupe.1G397100, Prupe.1G397200, Prupe.6G008100, Prupe.8G036300, Prupe.8G215200
GO:0004518	MF	nuclease activity	0.445826	0.722555	0.807827	4	Prupe.6G139300, Prupe.6G139800, Prupe.6G141200, Prupe.8G202000
GO:0004620	MF	phospholipase activity	0.445322	0.722555	0.808958	2	Prupe.4G253800, Prupe.7G137100
GO:0031491	MF	nucleosome binding	0.44038	0.722555	0.820118	1	Prupe.8G049400
GO:0032440	MF	2-alkenal reductase [NAD(P)+] activity	0.445883	0.722555	0.807699	1	Prupe.7G268600
GO:1904668	BP	positive regulation of ubiquitin protein ligase activity	0.448711	0.724072	0.801376	1	Prupe.4G247700
GO:0009524	CC	phragmoplast	0.44923	0.724072	0.80022	1	Prupe.1G281000
GO:0097027	MF	ubiquitin-protein transferase activator activity	0.448711	0.724072	0.801376	1	Prupe.4G247700
GO:0003689	MF	DNA clamp loader activity	0.450379	0.724628	0.797666	1	Prupe.4G268900
GO:0031047	BP	gene silencing by RNA	0.452272	0.726376	0.793472	2	Prupe.4G108000, Prupe.8G202000
GO:0015743	BP	malate transport	0.45453	0.728703	0.788492	1	Prupe.5G040200
GO:0017148	BP	negative regulation of translation	0.45877	0.734196	0.779205	2	Prupe.6G139300, Prupe.6G139800
GO:0046777	BP	protein autophosphorylation	0.474897	0.742923	0.744658	6	Prupe.1G510800, Prupe.4G104300, Prupe.4G104500, Prupe.6G087900, Prupe.6G228200, Prupe.8G090600
GO:0042254	BP	ribosome biogenesis	0.469647	0.742923	0.755775	4	Prupe.1G568900, Prupe.1G572400, Prupe.8G015200, Prupe.8G015700
GO:0000209	BP	protein polyubiquitination	0.469652	0.742923	0.755763	4	Prupe.1G383000, Prupe.6G047000, Prupe.6G094500, Prupe.6G115700
GO:0034599	BP	cellular response to oxidative stress	0.469086	0.742923	0.756968	2	Prupe.2G274600, Prupe.6G242200
GO:0006073	BP	cellular glucan metabolic process	0.47263	0.742923	0.749442	2	Prupe.1G088600, Prupe.1G088900
GO:0006662	BP	glycerol ether metabolic process	0.474943	0.742923	0.744561	2	Prupe.1G373000, Prupe.1G373100
GO:0010114	BP	response to red light	0.466131	0.742923	0.763288	1	Prupe.8G142700
GO:0000302	BP	response to reactive oxygen species	0.466698	0.742923	0.762074	1	Prupe.6G242200
GO:0015860	BP	purine nucleoside transmembrane transport	0.472219	0.742923	0.750313	1	Prupe.5G048000
GO:0030490	BP	maturation of SSU-rRNA	0.47426	0.742923	0.745999	1	Prupe.1G545600
GO:0016762	MF	xyloglucan:xyloglucosyl transferase activity	0.47263	0.742923	0.749442	2	Prupe.1G088600, Prupe.1G088900
GO:0010997	MF	anaphase-promoting complex binding	0.470095	0.742923	0.75482	1	Prupe.4G247700
GO:0015211	MF	purine nucleoside transmembrane transporter activity	0.472219	0.742923	0.750313	1	Prupe.5G048000
GO:0006896	BP	Golgi to vacuole transport	0.476664	0.743035	0.740943	1	Prupe.8G015800
GO:0008083	MF	growth factor activity	0.476136	0.743035	0.742053	1	Prupe.6G217500
GO:0006665	BP	sphingolipid metabolic process	0.480814	0.74821	0.732275	1	Prupe.5G016200
GO:0006221	BP	pyrimidine nucleotide biosynthetic process	0.483506	0.751101	0.726692	1	Prupe.5G049900
GO:0008308	MF	voltage-gated anion channel activity	0.48875	0.757941	0.715904	1	Prupe.5G186500
GO:0009251	BP	glucan catabolic process	0.500719	0.774183	0.69171	1	Prupe.2G092900
GO:0006672	BP	ceramide metabolic process	0.500942	0.774183	0.691265	1	Prupe.1G273700
GO:0016554	BP	cytidine to uridine editing	0.503881	0.774739	0.685415	1	Prupe.2G080400
GO:0031225	CC	anchored component of membrane	0.503435	0.774739	0.686302	1	Prupe.1G575900
GO:0051537	MF	2 iron, 2 sulfur cluster binding	0.503201	0.774739	0.686766	2	Prupe.1G397100, Prupe.1G397200
GO:0061077	BP	chaperone-mediated protein folding	0.506139	0.775392	0.680945	1	Prupe.1G558200
GO:0045910	BP	negative regulation of DNA recombination	0.506888	0.775392	0.679466	1	Prupe.5G053600
GO:0000151	CC	ubiquitin ligase complex	0.505443	0.775392	0.682321	2	Prupe.6G094500, Prupe.6G115700
GO:0009060	BP	aerobic respiration	0.508232	0.776131	0.676817	1	Prupe.8G028000
GO:0005667	CC	transcription regulator complex	0.509219	0.776322	0.674877	1	Prupe.6G139700
GO:0000974	CC	Prp19 complex	0.511125	0.7766	0.671141	1	Prupe.6G139700
GO:0005507	MF	copper ion binding	0.510671	0.7766	0.672029	4	Prupe.3G094600, Prupe.5G078700, Prupe.8G046800, Prupe.8G047500
GO:0030154	BP	cell differentiation	0.518302	0.7782	0.657197	4	Prupe.1G447300, Prupe.6G217500, Prupe.6G334400, Prupe.6G334500
GO:0010215	BP	cellulose microfibril organization	0.51731	0.7782	0.659112	1	Prupe.1G575900
GO:0045017	BP	glycerolipid biosynthetic process	0.517885	0.7782	0.658002	1	Prupe.4G257800
GO:0034968	BP	histone lysine methylation	0.518704	0.7782	0.656422	1	Prupe.2G064600
GO:0030261	BP	chromosome condensation	0.519377	0.7782	0.655125	1	Prupe.5G053600
GO:0005987	BP	sucrose catabolic process	0.519952	0.7782	0.654019	1	Prupe.6G229900
GO:0070469	CC	respirasome	0.517959	0.7782	0.657859	2	Prupe.5G018700, Prupe.8G028000
GO:0012507	CC	ER to Golgi transport vesicle membrane	0.517256	0.7782	0.659217	1	Prupe.3G293500
GO:0031464	CC	Cul4A-RING E3 ubiquitin ligase complex	0.518001	0.7782	0.657778	1	Prupe.3G068400
GO:0030515	MF	snoRNA binding	0.522917	0.78046	0.648333	1	Prupe.8G084800
GO:0047196	MF	long-chain-alcohol O-fatty-acyltransferase activity	0.523194	0.78046	0.647803	1	Prupe.4G257800
GO:0051017	BP	actin filament bundle assembly	0.526456	0.782735	0.641587	1	Prupe.6G181100
GO:0016618	MF	hydroxypyruvate reductase activity	0.525838	0.782735	0.642762	1	Prupe.2G150200
GO:0005778	CC	peroxisomal membrane	0.527822	0.783472	0.638996	1	Prupe.2G276800
GO:0004499	MF	N,N-dimethylaniline monooxygenase activity	0.530045	0.785477	0.634794	1	Prupe.8G177000
GO:0042546	BP	cell wall biogenesis	0.534278	0.786576	0.626839	2	Prupe.1G088600, Prupe.1G088900
GO:0016887	MF	ATPase activity	0.534125	0.786576	0.627125	13	Prupe.1G471300, Prupe.2G084300, Prupe.2G234200, Prupe.2G234400, Prupe.2G238800, Prupe.3G059800, Prupe.3G060000, Prupe.3G076600, Prupe.3G273300, Prupe.4G254600, Prupe.6G000800, Prupe.6G079800, Prupe.6G191500
GO:0016811	MF	hydrolase activity, acting on carbon-nitrogen (but not peptide) bonds, in linear amides	0.533042	0.786576	0.629156	1	Prupe.1G273700
GO:0070042	MF	rRNA (uridine-N3-)-methyltransferase activity	0.533378	0.786576	0.628525	1	Prupe.3G193200
GO:0005347	MF	ATP transmembrane transporter activity	0.537064	0.789388	0.621637	2	Prupe.4G244400, Prupe.8G067800
GO:0010466	BP	negative regulation of peptidase activity	0.541669	0.793568	0.613099	2	Prupe.1G172900, Prupe.6G034500
GO:0030414	MF	peptidase inhibitor activity	0.541669	0.793568	0.613099	2	Prupe.1G172900, Prupe.6G034500
GO:0006302	BP	double-strand break repair	0.543653	0.794085	0.609444	1	Prupe.3G262700
GO:0016925	BP	protein sumoylation	0.543986	0.794085	0.608831	1	Prupe.4G277000
GO:0006098	BP	pentose-phosphate shunt	0.544906	0.794085	0.607142	1	Prupe.4G102900
GO:0030267	MF	glyoxylate reductase (NADP) activity	0.545548	0.794085	0.605965	1	Prupe.2G150200
GO:0006261	BP	DNA-dependent DNA replication	0.548928	0.797717	0.599788	1	Prupe.4G268900
GO:0006364	BP	rRNA processing	0.550262	0.798367	0.597361	5	Prupe.6G204500, Prupe.7G186700, Prupe.8G015200, Prupe.8G015700, Prupe.8G084800
GO:0004575	MF	sucrose alpha-glucosidase activity	0.55524	0.804295	0.588355	1	Prupe.6G229900
GO:0006006	BP	glucose metabolic process	0.558948	0.806496	0.581699	1	Prupe.5G008000
GO:0006406	BP	mRNA export from nucleus	0.559168	0.806496	0.581306	1	Prupe.8G026600
GO:0031936	BP	negative regulation of chromatin silencing	0.559445	0.806496	0.58081	1	Prupe.5G053600
GO:0006817	BP	phosphate ion transport	0.561752	0.808529	0.576694	1	Prupe.1G278800
GO:0006520	BP	cellular amino acid metabolic process	0.563705	0.808595	0.573224	2	Prupe.3G133000, Prupe.6G116600
GO:0010411	BP	xyloglucan metabolic process	0.564491	0.808595	0.571832	2	Prupe.1G088600, Prupe.1G088900
GO:0009826	BP	unidimensional cell growth	0.56326	0.808595	0.574014	1	Prupe.1G535600
GO:0043248	BP	proteasome assembly	0.565641	0.808957	0.569795	1	Prupe.2G081800
GO:0044390	MF	ubiquitin-like protein conjugating enzyme binding	0.568497	0.811753	0.564759	1	Prupe.2G123600
GO:0016036	BP	cellular response to phosphate starvation	0.57159	0.814764	0.559334	1	Prupe.1G278800
GO:0016602	CC	CCAAT-binding factor complex	0.572924	0.814764	0.557003	1	Prupe.3G197300
GO:0033926	MF	glycopeptide alpha-N-acetylgalactosaminidase activity	0.573319	0.814764	0.556313	1	Prupe.6G229900
GO:0006465	BP	signal peptide processing	0.575663	0.816433	0.552233	1	Prupe.1G519000
GO:0000723	BP	telomere maintenance	0.576306	0.816433	0.551117	1	Prupe.1G200900
GO:0006833	BP	water transport	0.581313	0.820946	0.542465	1	Prupe.1G449500
GO:0016874	MF	ligase activity	0.581226	0.820946	0.542616	4	Prupe.5G049900, Prupe.5G096900, Prupe.8G045400, Prupe.8G074400
GO:0002098	BP	tRNA wobble uridine modification	0.583336	0.821973	0.538992	1	Prupe.8G113200
GO:0018024	MF	histone-lysine N-methyltransferase activity	0.583865	0.821973	0.538085	1	Prupe.2G064600
GO:0032981	BP	mitochondrial respiratory chain complex I assembly	0.585534	0.823036	0.535231	1	Prupe.3G259500
GO:0008081	MF	phosphoric diester hydrolase activity	0.587265	0.824183	0.53228	1	Prupe.3G250100
GO:0010088	BP	phloem development	0.593893	0.829609	0.521056	1	Prupe.1G202900
GO:0000325	CC	plant-type vacuole	0.592476	0.829609	0.523445	1	Prupe.2G305600
GO:0046961	MF	proton-transporting ATPase activity, rotational mechanism	0.59367	0.829609	0.521431	1	Prupe.6G005500
GO:0015250	MF	water channel activity	0.595028	0.829907	0.519147	1	Prupe.1G449500
GO:0010468	BP	regulation of gene expression	0.59925	0.833397	0.512077	3	Prupe.1G424400, Prupe.6G023800, Prupe.6G167600
GO:0004144	MF	diacylglycerol O-acyltransferase activity	0.59938	0.833397	0.51186	1	Prupe.4G257800
GO:0019432	BP	triglyceride biosynthetic process	0.603347	0.834338	0.505264	1	Prupe.4G257800
GO:0000932	CC	P-body	0.603897	0.834338	0.504352	2	Prupe.6G139300, Prupe.6G139800
GO:0005871	CC	kinesin complex	0.602523	0.834338	0.50663	1	Prupe.6G000800
GO:0004564	MF	beta-fructofuranosidase activity	0.604687	0.834338	0.503045	1	Prupe.6G229900
GO:0015991	#N/A	#N/A	0.602517	0.834338	0.506639	1	Prupe.6G005500
GO:0019762	BP	glucosinolate catabolic process	0.610078	0.836652	0.494168	2	Prupe.6G019000, Prupe.6G136300
GO:0012505	CC	endomembrane system	0.610047	0.836652	0.49422	4	Prupe.1G209400, Prupe.1G346300, Prupe.4G245900, Prupe.4G283500
GO:0051287	MF	NAD binding	0.607814	0.836652	0.497886	3	Prupe.2G150200, Prupe.5G008000, Prupe.5G062300
GO:0008375	MF	acetylglucosaminyltransferase activity	0.608631	0.836652	0.496543	2	Prupe.2G239400, Prupe.6G089900
GO:0009651	BP	response to salt stress	0.61674	0.837725	0.483308	6	Prupe.2G243800, Prupe.6G019000, Prupe.6G066300, Prupe.6G066500, Prupe.6G136300, Prupe.8G258500
GO:1902600	BP	proton transmembrane transport	0.614634	0.837725	0.486728	4	Prupe.1G209400, Prupe.1G346300, Prupe.4G283500, Prupe.6G005500
GO:0006812	BP	cation transport	0.615695	0.837725	0.485004	3	Prupe.1G209400, Prupe.1G346300, Prupe.4G283500
GO:0019252	BP	starch biosynthetic process	0.613346	0.837725	0.488825	1	Prupe.4G136700
GO:0007015	BP	actin filament organization	0.624088	0.837725	0.471464	1	Prupe.6G181100
GO:0080156	BP	mitochondrial mRNA modification	0.624225	0.837725	0.471245	1	Prupe.2G080400
GO:0048285	BP	organelle fission	0.625247	0.837725	0.469609	1	Prupe.2G188500
GO:0009742	BP	brassinosteroid mediated signaling pathway	0.625907	0.837725	0.468554	1	Prupe.6G065300
GO:0043547	BP	positive regulation of GTPase activity	0.628623	0.837725	0.464223	1	Prupe.1G466000
GO:0030245	BP	cellulose catabolic process	0.629028	0.837725	0.46358	1	Prupe.5G106800
GO:0009116	BP	nucleoside metabolic process	0.629423	0.837725	0.462952	1	Prupe.1G450200
GO:0010499	BP	proteasomal ubiquitin-independent protein catabolic process	0.629704	0.837725	0.462505	1	Prupe.3G183900
GO:0006342	BP	chromatin silencing	0.632245	0.837725	0.458478	1	Prupe.6G104700
GO:0009705	CC	plant-type vacuole membrane	0.631225	0.837725	0.460093	2	Prupe.1G449500, Prupe.5G040200
GO:0008541	CC	proteasome regulatory particle, lid subcomplex	0.612118	0.837725	0.49083	1	Prupe.2G081800
GO:0005839	CC	proteasome core complex	0.619397	0.837725	0.479008	1	Prupe.3G183900
GO:0030170	MF	pyridoxal phosphate binding	0.617073	0.837725	0.482768	4	Prupe.3G094600, Prupe.3G133000, Prupe.5G016200, Prupe.6G116600
GO:0003682	MF	chromatin binding	0.631125	0.837725	0.460251	3	Prupe.3G196500, Prupe.6G167600, Prupe.7G060100
GO:0051015	MF	actin filament binding	0.623443	0.837725	0.472498	2	Prupe.2G165300, Prupe.6G181100
GO:0008374	MF	O-acyltransferase activity	0.61753	0.837725	0.482028	1	Prupe.1G420700
GO:0005215	MF	transporter activity	0.625159	0.837725	0.469749	1	Prupe.5G048000
GO:0008810	MF	cellulase activity	0.629028	0.837725	0.46358	1	Prupe.5G106800
GO:0005200	MF	structural constituent of cytoskeleton	0.632125	0.837725	0.458668	1	Prupe.8G052800
GO:0007623	BP	circadian rhythm	0.63481	0.839734	0.454429	1	Prupe.6G259200
GO:0090575	CC	RNA polymerase II transcription regulator complex	0.635626	0.839734	0.453145	1	Prupe.7G039800
GO:0016620	MF	oxidoreductase activity, acting on the aldehyde or oxo group of donors, NAD or NADP as acceptor	0.636885	0.840166	0.451167	1	Prupe.5G008000
GO:0009909	BP	regulation of flower development	0.638752	0.841397	0.44824	1	Prupe.1G398700
GO:0008097	MF	5S rRNA binding	0.640317	0.842227	0.445792	1	Prupe.1G192700
GO:0005736	CC	RNA polymerase I complex	0.641286	0.842272	0.444279	1	Prupe.2G047700
GO:0016627	MF	oxidoreductase activity, acting on the CH-CH group of donors	0.647216	0.848823	0.435076	1	Prupe.2G066300
GO:0048046	CC	apoplast	0.648541	0.849325	0.43303	9	Prupe.1G088600, Prupe.1G088900, Prupe.3G215500, Prupe.4G136700, Prupe.5G111000, Prupe.6G010500, Prupe.8G046800, Prupe.8G047500, Prupe.8G162100
GO:0003714	MF	transcription corepressor activity	0.651894	0.852477	0.427873	1	Prupe.8G049400
GO:0006970	BP	response to osmotic stress	0.654156	0.854195	0.42441	1	Prupe.8G258500
GO:0006351	BP	transcription, DNA-templated	0.657273	0.855704	0.419656	22	Prupe.1G223600, Prupe.1G287400, Prupe.1G371300, Prupe.1G388000, Prupe.1G481700, Prupe.1G519100, Prupe.1G530300, Prupe.1G531100, Prupe.1G531400, Prupe.1G539700, Prupe.1G542200, Prupe.2G047700, Prupe.2G047900, Prupe.3G009400, Prupe.4G178100, Prupe.7G134100, Prupe.7G143900, Prupe.7G261000, Prupe.8G049400, Prupe.8G069300, Prupe.8G122700, Prupe.8G125100
GO:0006457	BP	protein folding	0.658161	0.855704	0.418305	6	Prupe.1G493700, Prupe.2G243800, Prupe.2G301300, Prupe.3G066800, Prupe.6G066300, Prupe.6G066500
GO:0005741	CC	mitochondrial outer membrane	0.657524	0.855704	0.419275	1	Prupe.5G186500
GO:0061025	BP	membrane fusion	0.667596	0.86672	0.404073	1	Prupe.3G293500
GO:0043161	BP	proteasome-mediated ubiquitin-dependent protein catabolic process	0.670595	0.867358	0.399589	3	Prupe.1G488000, Prupe.1G488300, Prupe.3G183900
GO:0005384	MF	manganese ion transmembrane transporter activity	0.669418	0.867358	0.401346	1	Prupe.1G492500
GO:0003680	MF	AT DNA binding	0.670975	0.867358	0.399023	1	Prupe.1G530300
GO:0000266	BP	mitochondrial fission	0.67214	0.86762	0.397288	1	Prupe.2G188500
GO:0016413	MF	O-acetyltransferase activity	0.673353	0.867942	0.395485	2	Prupe.8G266300, Prupe.8G266400
GO:0050661	MF	NADP binding	0.674382	0.868026	0.393958	2	Prupe.5G008000, Prupe.8G177000
GO:0006260	BP	DNA replication	0.676688	0.869031	0.390545	3	Prupe.1G146000, Prupe.4G268900, Prupe.6G266400
GO:0000978	MF	RNA polymerase II cis-regulatory region sequence-specific DNA binding	0.677091	0.869031	0.389949	9	Prupe.1G223600, Prupe.1G371300, Prupe.1G531100, Prupe.1G531400, Prupe.2G047900, Prupe.3G197300, Prupe.6G263900, Prupe.7G206900, Prupe.8G069300
GO:0006096	BP	glycolytic process	0.680966	0.871196	0.384242	2	Prupe.6G076500, Prupe.7G165400
GO:0010228	BP	vegetative to reproductive phase transition of meristem	0.680035	0.871196	0.385611	1	Prupe.3G192900
GO:0032040	CC	small-subunit processome	0.681679	0.871196	0.383196	2	Prupe.1G568900, Prupe.8G084800
GO:0006623	BP	protein targeting to vacuole	0.682946	0.871462	0.38134	1	Prupe.8G015800
GO:0006338	BP	chromatin remodeling	0.684728	0.871462	0.378733	1	Prupe.1G146000
GO:0061631	MF	ubiquitin conjugating enzyme activity	0.684789	0.871462	0.378644	2	Prupe.1G383000, Prupe.6G047000
GO:0009654	CC	photosystem II oxygen evolving complex	0.686264	0.872107	0.376493	1	Prupe.1G277200
GO:0071421	BP	manganese ion transmembrane transport	0.690598	0.876378	0.370198	1	Prupe.1G492500
GO:0030001	BP	metal ion transport	0.697207	0.883521	0.360673	5	Prupe.1G137600, Prupe.1G492500, Prupe.1G523200, Prupe.4G117100, Prupe.4G241000
GO:0090305	BP	nucleic acid phosphodiester bond hydrolysis	0.704113	0.886041	0.350817	5	Prupe.4G179100, Prupe.6G139300, Prupe.6G139800, Prupe.6G141200, Prupe.8G202000
GO:0006139	BP	nucleobase-containing compound metabolic process	0.701845	0.886041	0.354042	1	Prupe.4G179100
GO:0016592	CC	mediator complex	0.701984	0.886041	0.353845	2	Prupe.1G181600, Prupe.1G518900
GO:0016746	MF	transferase activity, transferring acyl groups	0.703829	0.886041	0.35122	6	Prupe.1G310500, Prupe.1G401500, Prupe.4G245900, Prupe.4G252100, Prupe.4G253000, Prupe.4G257800
GO:0046910	MF	pectinesterase inhibitor activity	0.703948	0.886041	0.351051	2	Prupe.1G330800, Prupe.7G190500
GO:0022627	CC	cytosolic small ribosomal subunit	0.706163	0.886146	0.34791	4	Prupe.1G523300, Prupe.1G545600, Prupe.3G042800, Prupe.5G059500
GO:0008408	MF	3'-5' exonuclease activity	0.706085	0.886146	0.348019	1	Prupe.4G179100
GO:0071712	BP	ER-associated misfolded protein catabolic process	0.707453	0.88653	0.346085	1	Prupe.2G123600
GO:0016788	MF	hydrolase activity, acting on ester bonds	0.708687	0.886843	0.344342	6	Prupe.1G497700, Prupe.1G497800, Prupe.3G032900, Prupe.3G033500, Prupe.3G033600, Prupe.3G177600
GO:0000145	CC	exocyst	0.713261	0.890246	0.337908	1	Prupe.1G220900
GO:0047372	MF	acylglycerol lipase activity	0.713492	0.890246	0.337584	1	Prupe.7G137100
GO:0003746	MF	translation elongation factor activity	0.71437	0.890246	0.336354	1	Prupe.4G138900
GO:0010951	BP	negative regulation of endopeptidase activity	0.727889	0.90584	0.317607	2	Prupe.1G172900, Prupe.6G034500
GO:0015935	CC	small ribosomal subunit	0.730773	0.907145	0.313653	2	Prupe.1G523300, Prupe.5G059500
GO:0003712	MF	transcription coregulator activity	0.730952	0.907145	0.313408	3	Prupe.1G181600, Prupe.1G518900, Prupe.6G027400
GO:0005666	CC	RNA polymerase III complex	0.732051	0.90726	0.311905	1	Prupe.2G047700
GO:0009941	CC	chloroplast envelope	0.7355	0.910282	0.307205	6	Prupe.3G174600, Prupe.4G076200, Prupe.4G136700, Prupe.4G190500, Prupe.6G035200, Prupe.8G142700
GO:0003678	MF	DNA helicase activity	0.738488	0.912726	0.303151	1	Prupe.1G200900
GO:0000272	BP	polysaccharide catabolic process	0.739952	0.91287	0.30117	1	Prupe.5G106800
GO:0006487	BP	protein N-linked glycosylation	0.74063	0.91287	0.300254	1	Prupe.2G117600
GO:0006974	BP	cellular response to DNA damage stimulus	0.748935	0.921845	0.289103	3	Prupe.1G200900, Prupe.6G130500, Prupe.6G266400
GO:0006352	BP	DNA-templated transcription, initiation	0.753866	0.926648	0.282541	1	Prupe.1G443200
GO:0000785	CC	chromatin	0.757966	0.928972	0.277116	8	Prupe.1G223600, Prupe.1G371300, Prupe.1G531100, Prupe.1G531400, Prupe.2G047900, Prupe.6G263900, Prupe.8G049400, Prupe.8G069300
GO:0005198	MF	structural molecule activity	0.758538	0.928972	0.276362	1	Prupe.2G081800
GO:0015238	#N/A	#N/A	0.758849	0.928972	0.275952	2	Prupe.3G149800, Prupe.6G195500
GO:0008380	BP	RNA splicing	0.762921	0.932613	0.270601	3	Prupe.1G368500, Prupe.1G422500, Prupe.8G042700
GO:0000160	BP	phosphorelay signal transduction system	0.769076	0.932613	0.262565	2	Prupe.3G059200, Prupe.6G123100
GO:0042908	BP	xenobiotic transport	0.770105	0.932613	0.261229	2	Prupe.3G149800, Prupe.6G195500
GO:0019898	CC	extrinsic component of membrane	0.764873	0.932613	0.268046	1	Prupe.1G277200
GO:0005762	CC	mitochondrial large ribosomal subunit	0.769442	0.932613	0.262089	1	Prupe.6G102500
GO:0003690	MF	double-stranded DNA binding	0.769388	0.932613	0.262159	3	Prupe.2G040300, Prupe.5G053600, Prupe.6G266400
GO:0042910	MF	xenobiotic transmembrane transporter activity	0.770105	0.932613	0.261229	2	Prupe.3G149800, Prupe.6G195500
GO:0004175	MF	endopeptidase activity	0.769294	0.932613	0.262282	1	Prupe.3G183900
GO:0045490	BP	pectin catabolic process	0.773011	0.932941	0.257462	4	Prupe.1G330800, Prupe.1G565500, Prupe.5G245600, Prupe.7G190500
GO:0005773	CC	vacuole	0.771705	0.932941	0.259153	5	Prupe.1G192200, Prupe.1G299700, Prupe.6G128500, Prupe.7G179100, Prupe.8G235600
GO:0001228	MF	DNA-binding transcription activator activity, RNA polymerase II-specific	0.773481	0.932941	0.256854	1	Prupe.3G197300
GO:0016831	MF	carboxy-lyase activity	0.776406	0.935217	0.253079	1	Prupe.6G280700
GO:0003899	MF	DNA-directed 5'-3' RNA polymerase activity	0.778555	0.936553	0.250316	2	Prupe.1G443200, Prupe.2G047700
GO:0006869	BP	lipid transport	0.783141	0.939572	0.244442	2	Prupe.1G225100, Prupe.6G292600
GO:0009073	BP	aromatic amino acid family biosynthetic process	0.78315	0.939572	0.244431	1	Prupe.8G012300
GO:0004364	MF	glutathione transferase activity	0.785949	0.941675	0.240864	3	Prupe.4G146000, Prupe.4G146200, Prupe.8G210400
GO:0051539	MF	4 iron, 4 sulfur cluster binding	0.787964	0.941994	0.238303	3	Prupe.3G065500, Prupe.6G008100, Prupe.8G036300
GO:0043022	MF	ribosome binding	0.788306	0.941994	0.237869	1	Prupe.4G138900
GO:0015035	MF	protein disulfide oxidoreductase activity	0.792465	0.944459	0.232607	3	Prupe.1G373000, Prupe.1G373100, Prupe.1G410500
GO:0008237	MF	metallopeptidase activity	0.792377	0.944459	0.232718	2	Prupe.1G457200, Prupe.3G044500
GO:0006414	BP	translational elongation	0.796497	0.945512	0.227532	1	Prupe.4G138900
GO:0005802	CC	trans-Golgi network	0.795007	0.945512	0.229404	4	Prupe.1G278800, Prupe.3G214200, Prupe.6G024900, Prupe.8G015800
GO:0005096	MF	GTPase activator activity	0.795472	0.945512	0.22882	1	Prupe.1G466000
GO:0043086	BP	negative regulation of catalytic activity	0.800152	0.948602	0.222953	3	Prupe.1G330800, Prupe.6G036700, Prupe.7G190500
GO:0006633	BP	fatty acid biosynthetic process	0.801596	0.949065	0.22115	4	Prupe.1G310500, Prupe.1G401500, Prupe.2G005500, Prupe.6G018700
GO:0031386	MF	protein tag	0.804849	0.951665	0.217101	1	Prupe.4G277000
GO:0006629	BP	lipid metabolic process	0.806289	0.952118	0.215313	10	Prupe.1G420700, Prupe.2G005500, Prupe.2G066300, Prupe.3G029900, Prupe.3G250100, Prupe.4G253800, Prupe.5G016200, Prupe.5G121400, Prupe.6G018700, Prupe.7G137100
GO:0006508	BP	proteolysis	0.809385	0.954523	0.211481	22	Prupe.1G130900, Prupe.1G201000, Prupe.1G307100, Prupe.1G350400, Prupe.1G397700, Prupe.1G397800, Prupe.1G425500, Prupe.1G425600, Prupe.1G457200, Prupe.2G155700, Prupe.3G044500, Prupe.3G106000, Prupe.3G106300, Prupe.3G120900, Prupe.3G129900, Prupe.3G239300, Prupe.4G092400, Prupe.4G198900, Prupe.4G254500, Prupe.4G261000, Prupe.5G238300, Prupe.8G034000
GO:0000981	MF	DNA-binding transcription factor activity, RNA polymerase II-specific	0.816575	0.961743	0.202637	9	Prupe.1G223600, Prupe.1G371300, Prupe.1G531100, Prupe.1G531400, Prupe.2G047900, Prupe.3G197300, Prupe.6G263900, Prupe.7G039800, Prupe.8G069300
GO:0006281	BP	DNA repair	0.820894	0.964309	0.197362	5	Prupe.1G200900, Prupe.1G328900, Prupe.1G462400, Prupe.4G268900, Prupe.6G025200
GO:0005525	MF	GTP binding	0.819925	0.964309	0.198543	8	Prupe.1G572400, Prupe.2G188500, Prupe.4G106500, Prupe.4G138900, Prupe.4G272800, Prupe.6G085600, Prupe.8G050200, Prupe.8G052800
GO:0016853	MF	isomerase activity	0.82499	0.967859	0.192384	5	Prupe.1G146000, Prupe.3G026200, Prupe.3G026400, Prupe.4G102900, Prupe.6G076500
GO:0007017	BP	microtubule-based process	0.828491	0.969442	0.18815	1	Prupe.8G052800
GO:0003993	MF	acid phosphatase activity	0.828315	0.969442	0.188362	1	Prupe.8G088900
GO:0008017	MF	microtubule binding	0.829879	0.969807	0.186476	3	Prupe.2G188500, Prupe.2G283500, Prupe.6G000800
GO:0000502	CC	proteasome complex	0.831046	0.969912	0.18507	1	Prupe.3G183900
GO:0000028	BP	ribosomal small subunit assembly	0.839438	0.976266	0.175022	1	Prupe.1G545600
GO:0006334	BP	nucleosome assembly	0.841912	0.976266	0.17208	1	Prupe.5G053600
GO:0007018	BP	microtubule-based movement	0.84467	0.976266	0.168809	1	Prupe.6G000800
GO:0000278	BP	mitotic cell cycle	0.845566	0.976266	0.167749	1	Prupe.8G052800
GO:0032508	BP	DNA duplex unwinding	0.847317	0.976266	0.16568	1	Prupe.1G200900
GO:0006887	BP	exocytosis	0.847855	0.976266	0.165046	1	Prupe.1G220900
GO:0048364	BP	root development	0.848504	0.976266	0.16428	1	Prupe.1G440600
GO:0005509	MF	calcium ion binding	0.840371	0.976266	0.173912	9	Prupe.1G050000, Prupe.1G277200, Prupe.1G412900, Prupe.1G436900, Prupe.1G437000, Prupe.3G181800, Prupe.4G094100, Prupe.6G088800, Prupe.6G351100
GO:0043130	MF	ubiquitin binding	0.839313	0.976266	0.175171	1	Prupe.1G281000
GO:0003777	MF	microtubule motor activity	0.84467	0.976266	0.168809	1	Prupe.6G000800
GO:0106306	#N/A	#N/A	0.849492	0.976266	0.163117	2	Prupe.5G202500, Prupe.6G049100
GO:0106307	#N/A	#N/A	0.849492	0.976266	0.163117	2	Prupe.5G202500, Prupe.6G049100
GO:0098655	BP	cation transmembrane transport	0.851157	0.976933	0.161159	1	Prupe.2G030700
GO:0006749	BP	glutathione metabolic process	0.854438	0.978779	0.157312	3	Prupe.4G146000, Prupe.4G146200, Prupe.8G210400
GO:0006631	BP	fatty acid metabolic process	0.854938	0.978779	0.156726	3	Prupe.2G005500, Prupe.4G210600, Prupe.6G018700
GO:0051087	MF	chaperone binding	0.857779	0.979655	0.153409	1	Prupe.1G493700
GO:0004519	MF	endonuclease activity	0.857878	0.979655	0.153293	1	Prupe.8G202000
GO:1990904	CC	ribonucleoprotein complex	0.862147	0.983284	0.148329	1	Prupe.4G138900
GO:0006511	BP	ubiquitin-dependent protein catabolic process	0.863376	0.983441	0.146905	6	Prupe.2G081800, Prupe.2G123600, Prupe.3G183900, Prupe.6G094500, Prupe.6G115700, Prupe.8G015800
GO:0005623	CC	cell	0.868768	0.988333	0.140679	4	Prupe.1G373000, Prupe.1G373100, Prupe.1G410500, Prupe.1G498000
GO:0007275	BP	multicellular organism development	0.875875	0.991412	0.132532	3	Prupe.1G440600, Prupe.6G334400, Prupe.6G334500
GO:0051603	BP	proteolysis involved in cellular protein catabolic process	0.87487	0.991412	0.13368	2	Prupe.3G106300, Prupe.3G183900
GO:0000226	BP	microtubule cytoskeleton organization	0.874237	0.991412	0.134404	1	Prupe.8G052800
GO:0003924	MF	GTPase activity	0.873617	0.991412	0.135113	5	Prupe.2G188500, Prupe.4G106500, Prupe.4G138900, Prupe.8G050200, Prupe.8G052800
GO:0006310	BP	DNA recombination	0.878797	0.993471	0.129201	1	Prupe.1G200900
GO:0006397	BP	mRNA processing	0.882679	0.996223	0.124794	4	Prupe.2G080400, Prupe.8G026600, Prupe.8G042700, Prupe.8G167600
GO:0000027	BP	ribosomal large subunit assembly	0.884549	0.996223	0.122678	1	Prupe.6G171700
GO:0008080	MF	N-acetyltransferase activity	0.883549	0.996223	0.123809	1	Prupe.6G055100
GO:0006355	BP	regulation of transcription, DNA-templated	0.999476	1	0.000523655	38	Prupe.1G223600, Prupe.1G227400, Prupe.1G287400, Prupe.1G371300, Prupe.1G388000, Prupe.1G443200, Prupe.1G447300, Prupe.1G481700, Prupe.1G519100, Prupe.1G530300, Prupe.1G531100, Prupe.1G531400, Prupe.1G539700, Prupe.1G587100, Prupe.2G040300, Prupe.2G063800, Prupe.2G070300, Prupe.2G204700, Prupe.3G009400, Prupe.3G111400, Prupe.3G197300, Prupe.3G239500, Prupe.4G178100, Prupe.6G023800, Prupe.6G027400,…
GO:0005975	BP	carbohydrate metabolic process	0.911262	1	0.0929253	20	Prupe.1G088600, Prupe.1G088900, Prupe.1G205600, Prupe.2G092900, Prupe.2G179300, Prupe.2G227600, Prupe.4G136700, Prupe.4G165000, Prupe.4G255600, Prupe.5G106800, Prupe.6G019000, Prupe.6G088400, Prupe.6G136300, Prupe.6G156300, Prupe.6G156400, Prupe.6G156500, Prupe.6G181100, Prupe.6G229900, Prupe.7G258700, Prupe.7G258800
GO:0006357	BP	regulation of transcription by RNA polymerase II	0.923819	1	0.0792387	12	Prupe.1G181600, Prupe.1G223600, Prupe.1G371300, Prupe.1G518900, Prupe.1G531100, Prupe.1G531400, Prupe.2G047900, Prupe.3G197300, Prupe.6G263900, Prupe.7G039800, Prupe.7G206900, Prupe.8G069300
GO:0006412	BP	translation	0.996869	1	0.00313549	12	Prupe.1G192700, Prupe.1G523300, Prupe.1G545600, Prupe.3G042800, Prupe.4G138900, Prupe.5G059500, Prupe.5G096900, Prupe.6G034300, Prupe.6G102500, Prupe.6G171700, Prupe.8G045400, Prupe.8G074400
GO:0008152	BP	metabolic process	0.975206	1	0.0251061	10	Prupe.1G088600, Prupe.1G088900, Prupe.2G092900, Prupe.2G179300, Prupe.4G165000, Prupe.4G255600, Prupe.5G106800, Prupe.6G088400, Prupe.6G181100, Prupe.6G229900
GO:0016567	BP	protein ubiquitination	0.999925	1	7.45374e-05	7	Prupe.2G123600, Prupe.3G068400, Prupe.5G082700, Prupe.6G094500, Prupe.6G115700, Prupe.6G202800, Prupe.8G015800
GO:0071555	BP	cell wall organization	0.970219	1	0.0302338	5	Prupe.1G088600, Prupe.1G088900, Prupe.1G330800, Prupe.3G214200, Prupe.6G024900
GO:0016311	BP	dephosphorylation	0.968438	1	0.0320709	4	Prupe.4G136700, Prupe.6G049100, Prupe.6G119800, Prupe.8G088900
GO:0006486	BP	protein glycosylation	0.905028	1	0.0997895	3	Prupe.1G166100, Prupe.2G117600, Prupe.6G186000
GO:0045454	BP	cell redox homeostasis	0.959938	1	0.0408864	3	Prupe.1G373000, Prupe.1G373100, Prupe.1G410500
GO:0009734	BP	auxin-activated signaling pathway	0.96392	1	0.0367466	3	Prupe.1G287400, Prupe.1G444900, Prupe.1G481700
GO:0018215	BP	protein phosphopantetheinylation	0.969428	1	0.0310488	3	Prupe.1G383000, Prupe.6G229900, Prupe.7G085600
GO:0022900	BP	electron transport chain	0.972571	1	0.027812	3	Prupe.3G062100, Prupe.5G084400, Prupe.6G055000
GO:0015031	BP	protein transport	0.99987	1	0.00012971	3	Prupe.1G220900, Prupe.2G303800, Prupe.6G026300
GO:0006865	BP	amino acid transport	0.890777	1	0.115661	2	Prupe.1G444900, Prupe.1G490200
GO:0008652	BP	cellular amino acid biosynthetic process	0.900262	1	0.10507	2	Prupe.6G116600, Prupe.8G012300
GO:0042545	BP	cell wall modification	0.931218	1	0.0712614	2	Prupe.1G330800, Prupe.7G190500
GO:0050790	BP	regulation of catalytic activity	0.944126	1	0.0574956	2	Prupe.2G238800, Prupe.5G132200
GO:0045893	BP	positive regulation of transcription, DNA-templated	0.983126	1	0.0170178	2	Prupe.1G447300, Prupe.3G127700
GO:0000398	BP	mRNA splicing, via spliceosome	0.983235	1	0.0169068	2	Prupe.3G009200, Prupe.6G139700
GO:0009733	BP	response to auxin	0.98807	1	0.0120014	2	Prupe.3G268000, Prupe.8G158200
GO:0006470	BP	protein dephosphorylation	0.98902	1	0.011041	2	Prupe.5G202500, Prupe.6G049100
GO:0009409	BP	response to cold	0.892877	1	0.113307	1	Prupe.8G142700
GO:0002181	BP	cytoplasmic translation	0.912437	1	0.091636	1	Prupe.6G171700
GO:0006353	BP	DNA-templated transcription, termination	0.915916	1	0.087831	1	Prupe.2G040300
GO:0016042	BP	lipid catabolic process	0.933409	1	0.0689121	1	Prupe.7G137100
GO:0032502	BP	developmental process	0.958369	1	0.0425225	1	Prupe.2G040300
GO:0006888	BP	endoplasmic reticulum to Golgi vesicle-mediated transport	0.974795	1	0.0255278	1	Prupe.3G293500
GO:0009737	BP	response to abscisic acid	0.981098	1	0.0190826	1	Prupe.8G258500
GO:0035556	BP	intracellular signal transduction	0.985928	1	0.0141715	1	Prupe.4G073500
GO:0009658	BP	chloroplast organization	0.987682	1	0.012395	1	Prupe.2G040300
GO:0007049	BP	cell cycle	0.989442	1	0.0106139	1	Prupe.6G139700
GO:0016192	BP	vesicle-mediated transport	0.999655	1	0.000345003	1	Prupe.2G303800
GO:0006886	BP	intracellular protein transport	0.999878	1	0.00012192	1	Prupe.3G293500
GO:0005634	CC	nucleus	1	1	-1.77858e-13	89	Prupe.1G150700, Prupe.1G181600, Prupe.1G223600, Prupe.1G227400, Prupe.1G287400, Prupe.1G368500, Prupe.1G371300, Prupe.1G381100, Prupe.1G383000, Prupe.1G388000, Prupe.1G398700, Prupe.1G422500, Prupe.1G447300, Prupe.1G481700, Prupe.1G518900, Prupe.1G519100, Prupe.1G530300, Prupe.1G531100, Prupe.1G531400, Prupe.1G539700, Prupe.1G572400, Prupe.1G587100, Prupe.2G047900, Prupe.2G063800, Prupe.2G064600,…
GO:0005737	CC	cytoplasm	0.999998	1	1.57718e-06	49	Prupe.1G278800, Prupe.1G410500, Prupe.1G457200, Prupe.1G488000, Prupe.1G488300, Prupe.2G005500, Prupe.2G043800, Prupe.2G066300, Prupe.2G153500, Prupe.2G164500, Prupe.2G165300, Prupe.2G188500, Prupe.2G234200, Prupe.2G234400, Prupe.2G274600, Prupe.3G044500, Prupe.3G059200, Prupe.3G183900, Prupe.3G193200, Prupe.3G239500, Prupe.4G073500, Prupe.4G136700, Prupe.4G146000, Prupe.4G146200, Prupe.4G179100,…
GO:0005829	CC	cytosol	0.991293	1	0.00874464	27	Prupe.1G244700, Prupe.1G303000, Prupe.1G303100, Prupe.1G493700, Prupe.2G038000, Prupe.2G150200, Prupe.2G274600, Prupe.2G301300, Prupe.3G059200, Prupe.3G066800, Prupe.3G079400, Prupe.4G272300, Prupe.5G132200, Prupe.5G202500, Prupe.6G076500, Prupe.6G123100, Prupe.6G211000, Prupe.6G229900, Prupe.6G242200, Prupe.6G280700, Prupe.7G165400, Prupe.8G018400, Prupe.8G023400, Prupe.8G045400, Prupe.8G083400,…
GO:0009507	CC	chloroplast	0.96572	1	0.0348814	26	Prupe.1G225700, Prupe.1G277200, Prupe.1G397100, Prupe.1G397200, Prupe.1G443200, Prupe.1G497100, Prupe.1G558200, Prupe.2G040300, Prupe.2G269900, Prupe.3G089500, Prupe.3G157200, Prupe.3G174600, Prupe.4G076200, Prupe.4G093900, Prupe.4G190500, Prupe.4G238400, Prupe.4G272300, Prupe.5G008000, Prupe.6G035200, Prupe.6G085600, Prupe.6G242200, Prupe.6G259200, Prupe.8G000800, Prupe.8G074400, Prupe.8G093400,…
GO:0005576	CC	extracellular region	0.964433	1	0.0362145	25	Prupe.1G088600, Prupe.1G088900, Prupe.1G330800, Prupe.1G440600, Prupe.2G092900, Prupe.2G097700, Prupe.2G179300, Prupe.3G215500, Prupe.4G276800, Prupe.5G093500, Prupe.5G111000, Prupe.6G010500, Prupe.6G013400, Prupe.6G013500, Prupe.6G044700, Prupe.6G044800, Prupe.6G181100, Prupe.6G217500, Prupe.7G050900, Prupe.8G046800, Prupe.8G047500, Prupe.8G071600, Prupe.8G102800, Prupe.8G116400, Prupe.8G162100
GO:0005618	CC	cell wall	0.997347	1	0.00265641	8	Prupe.1G088600, Prupe.1G088900, Prupe.1G330800, Prupe.1G565500, Prupe.4G165000, Prupe.5G245600, Prupe.6G128500, Prupe.7G190500
GO:0005840	CC	ribosome	0.998975	1	0.00102513	8	Prupe.1G192700, Prupe.1G523300, Prupe.1G545600, Prupe.3G042800, Prupe.5G059500, Prupe.6G034300, Prupe.6G102500, Prupe.6G171700
GO:0005783	CC	endoplasmic reticulum	0.998997	1	0.00100389	8	Prupe.1G225100, Prupe.1G519000, Prupe.2G117600, Prupe.2G279400, Prupe.3G293500, Prupe.4G106500, Prupe.6G047000, Prupe.8G258500
GO:0005739	CC	mitochondrion	0.999998	1	1.77317e-06	8	Prupe.2G080400, Prupe.5G018700, Prupe.6G000800, Prupe.6G008100, Prupe.6G102500, Prupe.8G008800, Prupe.8G028000, Prupe.8G074400
GO:0009506	CC	plasmodesma	0.914899	1	0.0889413	7	Prupe.2G077800, Prupe.2G320000, Prupe.4G276800, Prupe.6G087900, Prupe.6G128500, Prupe.6G228200, Prupe.8G090600
GO:0005794	CC	Golgi apparatus	0.999987	1	1.28681e-05	7	Prupe.1G166100, Prupe.1G278800, Prupe.2G153500, Prupe.6G186000, Prupe.8G258500, Prupe.8G266300, Prupe.8G266400
GO:0009570	CC	chloroplast stroma	0.894048	1	0.111996	6	Prupe.1G449200, Prupe.1G449300, Prupe.2G238800, Prupe.3G094600, Prupe.4G136700, Prupe.7G102300
GO:0046658	CC	anchored component of plasma membrane	0.964249	1	0.0364057	5	Prupe.1G225100, Prupe.1G575900, Prupe.3G062100, Prupe.4G255600, Prupe.5G084400
GO:0005789	CC	endoplasmic reticulum membrane	0.994875	1	0.00513779	5	Prupe.1G519000, Prupe.2G117600, Prupe.2G279400, Prupe.4G106500, Prupe.5G016200
GO:0005615	CC	extracellular space	0.930849	1	0.0716585	4	Prupe.1G520800, Prupe.1G520900, Prupe.3G106300, Prupe.8G102800
GO:0005622	CC	intracellular	0.980689	1	0.0195003	4	Prupe.1G318400, Prupe.1G398700, Prupe.3G059200, Prupe.6G123100
GO:0043231	CC	intracellular membrane-bounded organelle	0.998058	1	0.00194405	4	Prupe.3G044500, Prupe.3G256000, Prupe.6G203800, Prupe.6G203900
GO:0005874	CC	microtubule	0.88942	1	0.117186	3	Prupe.2G283500, Prupe.6G000800, Prupe.8G052800
GO:0005743	CC	mitochondrial inner membrane	0.952321	1	0.0488529	3	Prupe.3G239300, Prupe.4G244400, Prupe.8G028000
GO:0005694	CC	chromosome	0.915689	1	0.0880781	2	Prupe.1G146000, Prupe.2G064600
GO:0022625	CC	cytosolic large ribosomal subunit	0.993473	1	0.00654809	2	Prupe.6G034300, Prupe.6G171700
GO:0000139	CC	Golgi membrane	0.998863	1	0.00113775	2	Prupe.1G166100, Prupe.6G186000
GO:0005764	CC	lysosome	0.9234	1	0.0796931	1	Prupe.3G106300
GO:0000786	CC	nucleosome	0.95209	1	0.0490954	1	Prupe.5G053600
GO:0005777	CC	peroxisome	0.972026	1	0.0283728	1	Prupe.2G276800
GO:0005856	CC	cytoskeleton	0.980794	1	0.0193928	1	Prupe.8G052800
GO:0005768	CC	endosome	0.998614	1	0.00138721	1	Prupe.8G015800
GO:0005774	CC	vacuolar membrane	0.99875	1	0.00125038	1	Prupe.2G305600
GO:0003677	MF	DNA binding	0.999984	1	1.57216e-05	42	Prupe.1G146000, Prupe.1G150700, Prupe.1G200900, Prupe.1G223600, Prupe.1G371300, Prupe.1G388000, Prupe.1G443200, Prupe.1G462400, Prupe.1G519100, Prupe.1G531100, Prupe.1G531400, Prupe.1G539700, Prupe.1G587100, Prupe.2G047900, Prupe.2G063800, Prupe.2G070300, Prupe.2G204700, Prupe.3G009400, Prupe.3G111400, Prupe.3G127700, Prupe.3G268000, Prupe.4G178100, Prupe.4G268900, Prupe.5G053600, Prupe.6G084300,…
GO:0003676	MF	nucleic acid binding	0.935621	1	0.0665444	29	Prupe.1G202000, Prupe.1G368500, Prupe.1G422500, Prupe.1G476800, Prupe.2G022700, Prupe.2G036800, Prupe.2G044300, Prupe.2G078300, Prupe.2G080400, Prupe.3G009200, Prupe.3G190000, Prupe.4G108000, Prupe.4G174500, Prupe.4G179100, Prupe.6G023800, Prupe.6G094500, Prupe.6G139300, Prupe.6G139800, Prupe.6G141200, Prupe.6G141500, Prupe.6G197500, Prupe.6G249300, Prupe.7G083900, Prupe.7G120900, Prupe.8G042600,…
GO:0003723	MF	RNA binding	0.998426	1	0.00157511	25	Prupe.1G368500, Prupe.1G422500, Prupe.1G476800, Prupe.1G523300, Prupe.1G568900, Prupe.2G078200, Prupe.2G078300, Prupe.2G080400, Prupe.2G164500, Prupe.3G042800, Prupe.4G219300, Prupe.4G219400, Prupe.4G219500, Prupe.5G059500, Prupe.6G034300, Prupe.6G141200, Prupe.6G171700, Prupe.6G197500, Prupe.8G015200, Prupe.8G015700, Prupe.8G042700, Prupe.8G103900, Prupe.8G167600, Prupe.8G202000, Prupe.8G227100
GO:0003700	MF	DNA-binding transcription factor activity	0.910462	1	0.0938034	23	Prupe.1G223600, Prupe.1G371300, Prupe.1G443200, Prupe.1G447300, Prupe.1G530300, Prupe.1G531100, Prupe.1G531400, Prupe.2G063800, Prupe.2G070300, Prupe.3G009400, Prupe.3G127700, Prupe.6G023800, Prupe.6G073800, Prupe.6G133800, Prupe.6G139700, Prupe.7G039800, Prupe.7G134100, Prupe.7G155700, Prupe.7G206900, Prupe.7G261000, Prupe.8G069300, Prupe.8G125100, Prupe.8G234800
GO:0003824	MF	catalytic activity	0.921001	1	0.0822941	22	Prupe.1G416900, Prupe.1G450200, Prupe.1G548600, Prupe.1G548800, Prupe.1G587500, Prupe.2G020700, Prupe.3G037200, Prupe.3G094600, Prupe.3G133000, Prupe.3G156500, Prupe.4G280000, Prupe.5G005000, Prupe.5G016200, Prupe.6G049100, Prupe.6G051200, Prupe.6G051300, Prupe.6G076500, Prupe.6G119800, Prupe.6G216600, Prupe.7G165400, Prupe.8G041100, Prupe.I003000
GO:0008270	MF	zinc ion binding	0.993132	1	0.00689172	21	Prupe.1G227400, Prupe.1G318400, Prupe.1G398700, Prupe.1G447300, Prupe.1G457200, Prupe.2G064600, Prupe.3G044500, Prupe.3G284900, Prupe.6G080400, Prupe.6G162000, Prupe.6G204100, Prupe.6G205700, Prupe.6G205900, Prupe.6G206600, Prupe.6G207300, Prupe.6G207500, Prupe.6G207900, Prupe.8G018400, Prupe.8G025400, Prupe.8G042600, Prupe.8G207300
GO:0016798	MF	hydrolase activity, acting on glycosyl bonds	0.919322	1	0.0841185	11	Prupe.1G088600, Prupe.1G088900, Prupe.1G483900, Prupe.2G092900, Prupe.2G179300, Prupe.4G165000, Prupe.4G255600, Prupe.5G106800, Prupe.6G088400, Prupe.6G181100, Prupe.6G229900
GO:0003735	MF	structural constituent of ribosome	0.999082	1	0.000918805	8	Prupe.1G192700, Prupe.1G523300, Prupe.1G545600, Prupe.3G042800, Prupe.5G059500, Prupe.6G034300, Prupe.6G102500, Prupe.6G171700
GO:0008233	MF	peptidase activity	0.977255	1	0.0230075	7	Prupe.1G397700, Prupe.1G425500, Prupe.1G457200, Prupe.1G519000, Prupe.3G044500, Prupe.3G106300, Prupe.3G120900
GO:0043565	MF	sequence-specific DNA binding	0.998656	1	0.00134539	6	Prupe.1G447300, Prupe.1G542200, Prupe.3G009400, Prupe.3G197300, Prupe.6G073800, Prupe.7G206900
GO:0061630	MF	ubiquitin protein ligase activity	0.91391	1	0.0900231	5	Prupe.2G123600, Prupe.5G082700, Prupe.6G094500, Prupe.6G115700, Prupe.8G015800
GO:0009055	MF	electron transfer activity	0.978489	1	0.0217455	4	Prupe.1G410500, Prupe.3G062100, Prupe.5G084400, Prupe.6G055000
GO:0015297	MF	antiporter activity	0.900018	1	0.105341	3	Prupe.3G149800, Prupe.6G195500, Prupe.8G067800
GO:0004252	MF	serine-type endopeptidase activity	0.905747	1	0.0989949	3	Prupe.1G425500, Prupe.1G425600, Prupe.3G239300
GO:0008289	MF	lipid binding	0.960704	1	0.0400892	3	Prupe.1G225100, Prupe.5G235000, Prupe.6G292600
GO:0016791	MF	phosphatase activity	0.965384	1	0.0352295	3	Prupe.4G136700, Prupe.6G049100, Prupe.6G119800
GO:0004842	MF	ubiquitin-protein transferase activity	0.983976	1	0.0161533	3	Prupe.6G094500, Prupe.6G115700, Prupe.6G202800
GO:0004857	MF	enzyme inhibitor activity	0.899632	1	0.10577	2	Prupe.1G330800, Prupe.7G190500
GO:0045330	MF	aspartyl esterase activity	0.911317	1	0.0928644	2	Prupe.1G330800, Prupe.7G190500
GO:0030599	MF	pectinesterase activity	0.928131	1	0.0745822	2	Prupe.1G330800, Prupe.7G190500
GO:0004721	MF	phosphoprotein phosphatase activity	0.9465	1	0.0549839	2	Prupe.5G202500, Prupe.6G049100
GO:0008236	MF	serine-type peptidase activity	0.947828	1	0.0535821	2	Prupe.1G425500, Prupe.1G425600
GO:0046982	MF	protein heterodimerization activity	0.947942	1	0.0534621	2	Prupe.3G197300, Prupe.6G130500
GO:0004190	MF	aspartic-type endopeptidase activity	0.948837	1	0.0525179	2	Prupe.1G307100, Prupe.1G397700
GO:0030246	MF	carbohydrate binding	0.959624	1	0.0412136	2	Prupe.4G241200, Prupe.6G261500
GO:0004722	MF	protein serine/threonine phosphatase activity	0.960494	1	0.0403078	2	Prupe.5G202500, Prupe.6G049100
GO:0000976	MF	transcription regulatory region sequence-specific DNA binding	0.985396	1	0.0147115	2	Prupe.3G127700, Prupe.7G155700
GO:0003779	MF	actin binding	0.896734	1	0.108997	1	Prupe.2G165300
GO:0003774	MF	motor activity	0.918075	1	0.0854758	1	Prupe.6G000800
GO:0042973	MF	glucan endo-1,3-beta-D-glucosidase activity	0.932756	1	0.0696111	1	Prupe.4G255600
GO:0016779	MF	nucleotidyltransferase activity	0.942525	1	0.0591933	1	Prupe.8G093400
GO:0003697	MF	single-stranded DNA binding	0.942937	1	0.0587557	1	Prupe.6G317700
GO:0005516	MF	calmodulin binding	0.964071	1	0.0365905	1	Prupe.6G239100
GO:0019843	MF	rRNA binding	0.965243	1	0.0353754	1	Prupe.1G568900
GO:0015293	MF	symporter activity	0.972947	1	0.0274261	1	Prupe.1G444900
GO:0004197	MF	cysteine-type endopeptidase activity	0.975039	1	0.025278	1	Prupe.3G106300
GO:0045735	MF	nutrient reservoir activity	0.980495	1	0.0196976	1	Prupe.7G151000
GO:0004650	MF	polygalacturonase activity	0.993153	1	0.00687083	1	Prupe.4G165000
GO:0003729	MF	mRNA binding	0.999988	1	1.15213e-05	1	Prupe.8G042700

## Sheet: TNL_vs_TRL
		Supplementary Table S6. Summary for the gene ontology (GO) enrichment analysis of differentially expressed genes (DEGs).
ID	Ontology	Description	pvalue	p_adj	-log10(P-value)	Count	Gene.ID
GO:0043531	MF	ADP binding	3.45535e-28	3.95638e-25	63.2325	97	Prupe.1G159600, Prupe.1G161700, Prupe.1G161800, Prupe.1G163600, Prupe.1G163700, Prupe.1G263400, Prupe.1G528900, Prupe.1G541300, Prupe.1G542800, Prupe.1G545000, Prupe.1G545200, Prupe.1G545300, Prupe.2G011400, Prupe.2G014100, Prupe.2G025200, Prupe.2G029200, Prupe.2G029300, Prupe.2G043200, Prupe.2G046400, Prupe.2G055600, Prupe.2G055700, Prupe.2G057600, Prupe.2G059400, Prupe.2G067600, Prupe.2G083200,…
GO:0006952	BP	defense response	6.10669e-21	3.49608e-18	46.5449	88	Prupe.1G080500, Prupe.1G080600, Prupe.1G080700, Prupe.1G127500, Prupe.1G159600, Prupe.1G161700, Prupe.1G163600, Prupe.1G163700, Prupe.1G203300, Prupe.1G204000, Prupe.1G204700, Prupe.1G205600, Prupe.1G258100, Prupe.1G263400, Prupe.1G327500, Prupe.1G327600, Prupe.1G327700, Prupe.1G328200, Prupe.1G328800, Prupe.1G329000, Prupe.1G503200, Prupe.1G528900, Prupe.1G545000, Prupe.1G545200, Prupe.1G545300,…
GO:0050135	MF	NAD(P)+ nucleosidase activity	6.24733e-14	1.7883e-11	30.404	37	Prupe.1G161700, Prupe.1G161800, Prupe.1G263400, Prupe.2G055600, Prupe.2G055700, Prupe.2G057600, Prupe.2G059400, Prupe.2G083200, Prupe.2G113200, Prupe.2G126900, Prupe.2G127000, Prupe.3G010100, Prupe.3G010200, Prupe.6G083100, Prupe.6G132100, Prupe.6G160100, Prupe.7G037000, Prupe.7G037600, Prupe.8G005100, Prupe.8G005400, Prupe.8G023100, Prupe.8G023600, Prupe.8G023700, Prupe.8G023800, Prupe.8G026500,…
GO:0061809	MF	NAD+ nucleotidase, cyclic ADP-ribose generating	6.24733e-14	1.7883e-11	30.404	37	Prupe.1G161700, Prupe.1G161800, Prupe.1G263400, Prupe.2G055600, Prupe.2G055700, Prupe.2G057600, Prupe.2G059400, Prupe.2G083200, Prupe.2G113200, Prupe.2G126900, Prupe.2G127000, Prupe.3G010100, Prupe.3G010200, Prupe.6G083100, Prupe.6G132100, Prupe.6G160100, Prupe.7G037000, Prupe.7G037600, Prupe.8G005100, Prupe.8G005400, Prupe.8G023100, Prupe.8G023600, Prupe.8G023700, Prupe.8G023800, Prupe.8G026500,…
GO:0055114	BP	oxidation-reduction process	2.27438e-11	5.20833e-09	24.5067	203	Prupe.1G032800, Prupe.1G036400, Prupe.1G063200, Prupe.1G064900, Prupe.1G084500, Prupe.1G093800, Prupe.1G171200, Prupe.1G203800, Prupe.1G229700, Prupe.1G230500, Prupe.1G230800, Prupe.1G239200, Prupe.1G245400, Prupe.1G275800, Prupe.1G291500, Prupe.1G292000, Prupe.1G292400, Prupe.1G292500, Prupe.1G296600, Prupe.1G310300, Prupe.1G339000, Prupe.1G343000, Prupe.1G357100, Prupe.1G377300, Prupe.1G381900,…
GO:0016491	MF	oxidoreductase activity	5.19663e-10	9.91691e-08	21.3778	157	Prupe.1G032800, Prupe.1G036400, Prupe.1G064900, Prupe.1G084500, Prupe.1G171200, Prupe.1G203800, Prupe.1G229700, Prupe.1G230500, Prupe.1G230800, Prupe.1G239200, Prupe.1G245400, Prupe.1G291500, Prupe.1G292000, Prupe.1G292400, Prupe.1G292500, Prupe.1G296600, Prupe.1G339000, Prupe.1G343000, Prupe.1G357100, Prupe.1G377300, Prupe.1G381900, Prupe.1G386800, Prupe.1G386900, Prupe.1G387200, Prupe.1G387500,…
GO:0006468	BP	protein phosphorylation	3.31626e-09	5.42446e-07	19.5244	143	Prupe.1G074000, Prupe.1G083300, Prupe.1G139900, Prupe.1G145600, Prupe.1G157800, Prupe.1G168400, Prupe.1G224700, Prupe.1G244900, Prupe.1G314900, Prupe.1G315100, Prupe.1G358800, Prupe.1G362600, Prupe.1G386400, Prupe.1G427800, Prupe.1G429700, Prupe.1G431300, Prupe.1G444700, Prupe.1G469000, Prupe.1G469200, Prupe.1G502100, Prupe.1G505700, Prupe.1G515600, Prupe.1G515700, Prupe.1G515800, Prupe.1G556500,…
GO:0004672	MF	protein kinase activity	4.67092e-09	6.68526e-07	19.1819	139	Prupe.1G074000, Prupe.1G083300, Prupe.1G139900, Prupe.1G145600, Prupe.1G157800, Prupe.1G168400, Prupe.1G224700, Prupe.1G314900, Prupe.1G315100, Prupe.1G358800, Prupe.1G362600, Prupe.1G386400, Prupe.1G427800, Prupe.1G429700, Prupe.1G431300, Prupe.1G444700, Prupe.1G469000, Prupe.1G469200, Prupe.1G502100, Prupe.1G505700, Prupe.1G515600, Prupe.1G515700, Prupe.1G515800, Prupe.1G556500, Prupe.1G579200,…
GO:0016787	MF	hydrolase activity	9.52565e-09	1.21187e-06	18.4693	176	Prupe.1G110100, Prupe.1G149500, Prupe.1G161700, Prupe.1G161800, Prupe.1G169700, Prupe.1G178400, Prupe.1G208600, Prupe.1G237400, Prupe.1G251200, Prupe.1G260400, Prupe.1G263400, Prupe.1G275300, Prupe.1G275400, Prupe.1G302900, Prupe.1G309900, Prupe.1G316200, Prupe.1G325200, Prupe.1G331000, Prupe.1G333400, Prupe.1G342300, Prupe.1G348100, Prupe.1G352200, Prupe.1G357500, Prupe.1G361300, Prupe.1G368500,…
GO:0004674	MF	protein serine/threonine kinase activity	1.23336e-08	1.4122e-06	18.2109	95	Prupe.1G074000, Prupe.1G083300, Prupe.1G145600, Prupe.1G168400, Prupe.1G244900, Prupe.1G358800, Prupe.1G386400, Prupe.1G427800, Prupe.1G429700, Prupe.1G444700, Prupe.1G469000, Prupe.1G469200, Prupe.1G481600, Prupe.1G502100, Prupe.1G505700, Prupe.2G004700, Prupe.2G044400, Prupe.2G048700, Prupe.2G088400, Prupe.2G093000, Prupe.2G116000, Prupe.2G116100, Prupe.2G118500, Prupe.2G325000, Prupe.3G012100,…
GO:0016021	CC	integral component of membrane	9.39685e-08	9.78127e-06	16.1803	565	Prupe.1G008800, Prupe.1G042800, Prupe.1G058700, Prupe.1G063200, Prupe.1G064900, Prupe.1G074000, Prupe.1G090700, Prupe.1G104300, Prupe.1G125800, Prupe.1G139900, Prupe.1G141500, Prupe.1G142300, Prupe.1G148600, Prupe.1G150700, Prupe.1G162800, Prupe.1G163600, Prupe.1G168400, Prupe.1G185100, Prupe.1G185400, Prupe.1G203800, Prupe.1G222200, Prupe.1G236100, Prupe.1G239200, Prupe.1G249000, Prupe.1G256600,…
GO:0004497	MF	monooxygenase activity	2.09543e-07	1.99939e-05	15.3783	49	Prupe.1G064900, Prupe.1G084500, Prupe.1G229700, Prupe.1G230500, Prupe.1G230800, Prupe.1G291500, Prupe.1G292000, Prupe.1G292400, Prupe.1G292500, Prupe.1G296600, Prupe.1G381900, Prupe.1G386800, Prupe.1G386900, Prupe.1G387200, Prupe.1G387500, Prupe.1G388500, Prupe.1G427300, Prupe.1G537700, Prupe.1G538200, Prupe.2G086300, Prupe.2G148600, Prupe.2G171800, Prupe.3G039300, Prupe.4G152800, Prupe.4G153100,…
GO:0016020	CC	membrane	2.31373e-07	2.03787e-05	15.2792	602	Prupe.1G008800, Prupe.1G042800, Prupe.1G058700, Prupe.1G063200, Prupe.1G064900, Prupe.1G074000, Prupe.1G090700, Prupe.1G104300, Prupe.1G125800, Prupe.1G139900, Prupe.1G141500, Prupe.1G142300, Prupe.1G148600, Prupe.1G150700, Prupe.1G162800, Prupe.1G163600, Prupe.1G168400, Prupe.1G185100, Prupe.1G185400, Prupe.1G203800, Prupe.1G222200, Prupe.1G236100, Prupe.1G239200, Prupe.1G249000, Prupe.1G256600,…
GO:0008194	MF	UDP-glycosyltransferase activity	3.22047e-07	2.63388e-05	14.9486	39	Prupe.1G091100, Prupe.1G179000, Prupe.1G519500, Prupe.1G519600, Prupe.1G519700, Prupe.1G520300, Prupe.2G085300, Prupe.2G174700, Prupe.2G184700, Prupe.3G184700, Prupe.3G185100, Prupe.3G188500, Prupe.3G256000, Prupe.3G256100, Prupe.3G256300, Prupe.3G260000, Prupe.3G260100, Prupe.6G008000, Prupe.6G008300, Prupe.6G008400, Prupe.6G015900, Prupe.6G049700, Prupe.6G136900, Prupe.6G189900, Prupe.6G190100,…
GO:0020037	MF	heme binding	4.5398e-07	3.46538e-05	14.6052	64	Prupe.1G064900, Prupe.1G203800, Prupe.1G229700, Prupe.1G230500, Prupe.1G230800, Prupe.1G291500, Prupe.1G292000, Prupe.1G292400, Prupe.1G292500, Prupe.1G296600, Prupe.1G381900, Prupe.1G386800, Prupe.1G386900, Prupe.1G387200, Prupe.1G387300, Prupe.1G387500, Prupe.1G388500, Prupe.1G427300, Prupe.1G537700, Prupe.1G538200, Prupe.2G019000, Prupe.2G086300, Prupe.2G148600, Prupe.2G171800, Prupe.3G039300,…
GO:0005576	CC	extracellular region	1.02999e-06	7.37085e-05	13.786	85	Prupe.1G110100, Prupe.1G169700, Prupe.1G208600, Prupe.1G251200, Prupe.1G275300, Prupe.1G275400, Prupe.1G325200, Prupe.1G348100, Prupe.1G361900, Prupe.1G372800, Prupe.1G420000, Prupe.1G441000, Prupe.1G503200, Prupe.1G513200, Prupe.2G092900, Prupe.2G181400, Prupe.2G296000, Prupe.3G005900, Prupe.3G144000, Prupe.3G155600, Prupe.3G219700, Prupe.3G223200, Prupe.4G021100, Prupe.4G131900, Prupe.4G261900,…
GO:0016758	MF	transferase activity, transferring hexosyl groups	1.34601e-06	9.06579e-05	13.5184	39	Prupe.1G091100, Prupe.1G179000, Prupe.1G519500, Prupe.1G519600, Prupe.1G519700, Prupe.1G520300, Prupe.2G085300, Prupe.2G174700, Prupe.2G184700, Prupe.3G184700, Prupe.3G185100, Prupe.3G188500, Prupe.3G256000, Prupe.3G256100, Prupe.3G256300, Prupe.3G260000, Prupe.3G260100, Prupe.6G008000, Prupe.6G008300, Prupe.6G008400, Prupe.6G015900, Prupe.6G049700, Prupe.6G136900, Prupe.6G189900, Prupe.6G190100,…
GO:0005507	MF	copper ion binding	2.34292e-06	0.000149036	12.9641	20	Prupe.1G357100, Prupe.3G094600, Prupe.4G018800, Prupe.4G131900, Prupe.5G078700, Prupe.5G097900, Prupe.6G061300, Prupe.6G072100, Prupe.6G089300, Prupe.6G112800, Prupe.6G179500, Prupe.6G258000, Prupe.6G271500, Prupe.7G140500, Prupe.7G156500, Prupe.8G046800, Prupe.8G047500, Prupe.8G047900, Prupe.8G095400, Prupe.8G097000
GO:0007165	BP	signal transduction	3.679e-06	0.000221708	12.5129	43	Prupe.1G161400, Prupe.1G161700, Prupe.1G161800, Prupe.1G263400, Prupe.1G420000, Prupe.2G055600, Prupe.2G055700, Prupe.2G057600, Prupe.2G059400, Prupe.2G083200, Prupe.2G088600, Prupe.2G113200, Prupe.2G126900, Prupe.2G127000, Prupe.3G010100, Prupe.3G010200, Prupe.3G175800, Prupe.6G083100, Prupe.6G132100, Prupe.6G160100, Prupe.7G037000, Prupe.7G037600, Prupe.8G005100, Prupe.8G005400, Prupe.8G023100,…
GO:0005506	MF	iron ion binding	6.76338e-06	0.000387203	11.904	55	Prupe.1G064900, Prupe.1G203800, Prupe.1G229700, Prupe.1G230500, Prupe.1G230800, Prupe.1G291500, Prupe.1G292000, Prupe.1G292400, Prupe.1G292500, Prupe.1G296600, Prupe.1G343000, Prupe.1G381900, Prupe.1G386800, Prupe.1G386900, Prupe.1G387200, Prupe.1G387300, Prupe.1G387500, Prupe.1G388500, Prupe.1G427300, Prupe.1G537700, Prupe.1G538200, Prupe.2G085600, Prupe.2G086300, Prupe.2G113600, Prupe.2G148600,…
GO:0046274	BP	lignin catabolic process	1.19542e-05	0.00062216	11.3344	11	Prupe.6G061300, Prupe.6G072100, Prupe.6G089300, Prupe.6G258000, Prupe.6G271500, Prupe.7G156500, Prupe.8G046800, Prupe.8G047500, Prupe.8G047900, Prupe.8G095400, Prupe.8G097000
GO:0052716	MF	hydroquinone:oxygen oxidoreductase activity	1.19542e-05	0.00062216	11.3344	11	Prupe.6G061300, Prupe.6G072100, Prupe.6G089300, Prupe.6G258000, Prupe.6G271500, Prupe.7G156500, Prupe.8G046800, Prupe.8G047500, Prupe.8G047900, Prupe.8G095400, Prupe.8G097000
GO:0004553	MF	hydrolase activity, hydrolyzing O-glycosyl compounds	1.76643e-05	0.000879374	10.944	40	Prupe.1G169700, Prupe.1G309900, Prupe.1G331000, Prupe.1G352200, Prupe.1G372800, Prupe.1G380300, Prupe.1G513200, Prupe.2G092900, Prupe.2G181400, Prupe.2G198100, Prupe.2G227600, Prupe.2G314200, Prupe.3G048300, Prupe.3G086200, Prupe.3G210700, Prupe.3G223200, Prupe.4G164000, Prupe.4G186400, Prupe.4G186500, Prupe.4G186600, Prupe.4G221700, Prupe.4G255600, Prupe.5G008200, Prupe.5G118000, Prupe.6G019000,…
GO:0016705	MF	oxidoreductase activity, acting on paired donors, with incorporation or reduction of molecular oxygen	1.88908e-05	0.000901251	10.8768	49	Prupe.1G064900, Prupe.1G229700, Prupe.1G230500, Prupe.1G230800, Prupe.1G291500, Prupe.1G292000, Prupe.1G292400, Prupe.1G292500, Prupe.1G296600, Prupe.1G381900, Prupe.1G386800, Prupe.1G386900, Prupe.1G387200, Prupe.1G387300, Prupe.1G387500, Prupe.1G388500, Prupe.1G427300, Prupe.1G537700, Prupe.1G538200, Prupe.2G086300, Prupe.2G148600, Prupe.2G171800, Prupe.3G039300, Prupe.4G152800, Prupe.4G153100,…
GO:0019438	BP	aromatic compound biosynthetic process	2.73699e-05	0.00125354	10.5061	12	Prupe.2G199600, Prupe.3G119100, Prupe.3G120400, Prupe.3G129000, Prupe.3G129200, Prupe.3G129600, Prupe.3G129800, Prupe.8G171000, Prupe.8G171100, Prupe.8G171400, Prupe.8G171900, Prupe.8G172000
GO:0034220	BP	ion transmembrane transport	5.75572e-05	0.00253473	9.76273	21	Prupe.1G162800, Prupe.1G399800, Prupe.1G400300, Prupe.1G400600, Prupe.1G412700, Prupe.1G472600, Prupe.2G043500, Prupe.2G105400, Prupe.2G105700, Prupe.3G099200, Prupe.3G231900, Prupe.3G259100, Prupe.4G056600, Prupe.4G109500, Prupe.4G171700, Prupe.4G171800, Prupe.4G191200, Prupe.6G005500, Prupe.7G106900, Prupe.7G202700, Prupe.8G097600
GO:0016998	BP	cell wall macromolecule catabolic process	6.91513e-05	0.00280629	9.57921	7	Prupe.1G080500, Prupe.1G080600, Prupe.1G080700, Prupe.1G204000, Prupe.1G204700, Prupe.1G205600, Prupe.7G178500
GO:0016740	MF	transferase activity	6.61902e-05	0.00280629	9.62298	189	Prupe.1G011700, Prupe.1G016700, Prupe.1G074000, Prupe.1G083300, Prupe.1G091100, Prupe.1G145600, Prupe.1G159700, Prupe.1G168400, Prupe.1G169700, Prupe.1G179000, Prupe.1G216000, Prupe.1G278500, Prupe.1G294000, Prupe.1G305600, Prupe.1G346500, Prupe.1G375700, Prupe.1G383800, Prupe.1G386400, Prupe.1G427800, Prupe.1G429700, Prupe.1G444700, Prupe.1G469000, Prupe.1G469200, Prupe.1G483200, Prupe.1G502100,…
GO:0004970	MF	ionotropic glutamate receptor activity	7.10763e-05	0.00280629	9.55176	11	Prupe.1G399800, Prupe.1G400300, Prupe.1G400600, Prupe.1G412700, Prupe.2G043500, Prupe.2G105400, Prupe.2G105700, Prupe.4G056600, Prupe.4G171700, Prupe.4G171800, Prupe.7G106900
GO:0015276	MF	ligand-gated ion channel activity	9.04734e-05	0.00345307	9.31045	11	Prupe.1G399800, Prupe.1G400300, Prupe.1G400600, Prupe.1G412700, Prupe.2G043500, Prupe.2G105400, Prupe.2G105700, Prupe.4G056600, Prupe.4G171700, Prupe.4G171800, Prupe.7G106900
GO:0008171	MF	O-methyltransferase activity	9.75212e-05	0.00360199	9.23544	13	Prupe.2G107200, Prupe.2G199600, Prupe.3G119100, Prupe.3G120400, Prupe.3G129000, Prupe.3G129200, Prupe.3G129600, Prupe.3G129800, Prupe.8G171000, Prupe.8G171100, Prupe.8G171400, Prupe.8G171900, Prupe.8G172000
GO:0004364	MF	glutathione transferase activity	0.00015286	0.00546952	8.78599	16	Prupe.1G054900, Prupe.1G055000, Prupe.1G526000, Prupe.4G146000, Prupe.4G146100, Prupe.4G146200, Prupe.4G146400, Prupe.4G146800, Prupe.4G147000, Prupe.4G147100, Prupe.4G147200, Prupe.4G147300, Prupe.6G040700, Prupe.8G210300, Prupe.8G210400, Prupe.8G210500
GO:0030247	MF	polysaccharide binding	0.000185725	0.00644411	8.59124	22	Prupe.2G088400, Prupe.2G093000, Prupe.2G093300, Prupe.2G093700, Prupe.3G145600, Prupe.3G145800, Prupe.3G181200, Prupe.3G181400, Prupe.3G226000, Prupe.3G226700, Prupe.4G017500, Prupe.4G093000, Prupe.4G093100, Prupe.4G093300, Prupe.4G093500, Prupe.4G093600, Prupe.4G094100, Prupe.5G119300, Prupe.5G119500, Prupe.5G223800, Prupe.6G352800, Prupe.6G352900
GO:0016301	MF	kinase activity	0.000301118	0.0101406	8.10801	91	Prupe.1G074000, Prupe.1G083300, Prupe.1G145600, Prupe.1G168400, Prupe.1G386400, Prupe.1G427800, Prupe.1G429700, Prupe.1G444700, Prupe.1G469000, Prupe.1G469200, Prupe.1G502100, Prupe.1G505700, Prupe.1G556500, Prupe.2G004700, Prupe.2G044400, Prupe.2G048700, Prupe.2G087200, Prupe.2G088400, Prupe.2G093000, Prupe.2G093300, Prupe.2G093700, Prupe.2G116000, Prupe.2G116100, Prupe.2G118500, Prupe.3G012100,…
GO:0048544	BP	recognition of pollen	0.000321357	0.010513	8.04296	16	Prupe.1G429700, Prupe.1G502100, Prupe.3G131100, Prupe.3G226000, Prupe.3G226600, Prupe.3G226700, Prupe.4G032100, Prupe.4G142300, Prupe.4G193200, Prupe.4G195500, Prupe.6G017000, Prupe.6G017200, Prupe.6G017300, Prupe.6G017400, Prupe.6G165500, Prupe.8G024600
GO:0000325	CC	plant-type vacuole	0.000383348	0.0121926	7.86657	7	Prupe.1G236100, Prupe.2G305600, Prupe.3G051600, Prupe.3G051700, Prupe.5G112700, Prupe.I000500, Prupe.I000700
GO:0016798	MF	hydrolase activity, acting on glycosyl bonds	0.000545984	0.016896	7.51292	42	Prupe.1G110100, Prupe.1G169700, Prupe.1G251200, Prupe.1G309900, Prupe.1G331000, Prupe.1G352200, Prupe.1G372800, Prupe.1G380300, Prupe.1G513200, Prupe.2G092900, Prupe.2G175100, Prupe.2G181400, Prupe.2G301000, Prupe.2G314200, Prupe.3G005900, Prupe.3G048300, Prupe.3G086200, Prupe.3G210700, Prupe.3G221800, Prupe.3G223200, Prupe.4G164000, Prupe.4G221700, Prupe.4G255600, Prupe.4G261900, Prupe.4G262200,…
GO:0048046	CC	apoplast	0.000568315	0.0171242	7.47283	28	Prupe.1G169700, Prupe.1G352200, Prupe.1G372800, Prupe.3G223200, Prupe.5G111100, Prupe.5G111300, Prupe.5G240700, Prupe.6G061300, Prupe.6G072100, Prupe.6G089300, Prupe.6G112800, Prupe.6G258000, Prupe.6G271500, Prupe.7G083100, Prupe.7G112300, Prupe.7G156500, Prupe.7G200200, Prupe.7G225000, Prupe.8G025800, Prupe.8G035700, Prupe.8G046800, Prupe.8G047500, Prupe.8G047900, Prupe.8G089500, Prupe.8G095400,…
GO:0005524	MF	ATP binding	0.000627211	0.0181456	7.37423	187	Prupe.1G074000, Prupe.1G083300, Prupe.1G086500, Prupe.1G104300, Prupe.1G139900, Prupe.1G145600, Prupe.1G157800, Prupe.1G168400, Prupe.1G224700, Prupe.1G236100, Prupe.1G314900, Prupe.1G315100, Prupe.1G342300, Prupe.1G347900, Prupe.1G358800, Prupe.1G362600, Prupe.1G368500, Prupe.1G386400, Prupe.1G419600, Prupe.1G427800, Prupe.1G429700, Prupe.1G431300, Prupe.1G444700, Prupe.1G469000, Prupe.1G469200,…
GO:0106310	#N/A	#N/A	0.000649754	0.0181456	7.33892	23	Prupe.1G429700, Prupe.1G481600, Prupe.1G502100, Prupe.2G004700, Prupe.3G131100, Prupe.3G226600, Prupe.4G104500, Prupe.4G135600, Prupe.4G158000, Prupe.4G193200, Prupe.4G195500, Prupe.6G017000, Prupe.6G017200, Prupe.6G017300, Prupe.6G017400, Prupe.6G020500, Prupe.6G020700, Prupe.6G126100, Prupe.6G164400, Prupe.6G165400, Prupe.6G165500, Prupe.6G263300, Prupe.8G024600
GO:0106311	#N/A	#N/A	0.000649754	0.0181456	7.33892	23	Prupe.1G429700, Prupe.1G481600, Prupe.1G502100, Prupe.2G004700, Prupe.3G131100, Prupe.3G226600, Prupe.4G104500, Prupe.4G135600, Prupe.4G158000, Prupe.4G193200, Prupe.4G195500, Prupe.6G017000, Prupe.6G017200, Prupe.6G017300, Prupe.6G017400, Prupe.6G020500, Prupe.6G020700, Prupe.6G126100, Prupe.6G164400, Prupe.6G165400, Prupe.6G165500, Prupe.6G263300, Prupe.8G024600
GO:0006032	BP	chitin catabolic process	0.000691911	0.0188628	7.27605	7	Prupe.1G080500, Prupe.1G080600, Prupe.1G080700, Prupe.1G204000, Prupe.1G204700, Prupe.1G205600, Prupe.7G178500
GO:0016310	BP	phosphorylation	0.000710984	0.018932	7.24886	92	Prupe.1G074000, Prupe.1G083300, Prupe.1G145600, Prupe.1G168400, Prupe.1G386400, Prupe.1G427800, Prupe.1G429700, Prupe.1G444700, Prupe.1G469000, Prupe.1G469200, Prupe.1G502100, Prupe.1G505700, Prupe.1G556500, Prupe.2G004700, Prupe.2G044400, Prupe.2G048700, Prupe.2G087200, Prupe.2G088400, Prupe.2G093000, Prupe.2G093300, Prupe.2G093700, Prupe.2G116000, Prupe.2G116100, Prupe.2G118500, Prupe.3G012100,…
GO:0098542	BP	defense response to other organism	0.000748453	0.0194768	7.1975	8	Prupe.1G386800, Prupe.1G386900, Prupe.1G387200, Prupe.1G387500, Prupe.1G427300, Prupe.1G537700, Prupe.1G538200, Prupe.8G197300
GO:2000031	BP	regulation of salicylic acid mediated signaling pathway	0.000810646	0.0206264	7.11768	9	Prupe.3G135100, Prupe.3G135700, Prupe.3G154700, Prupe.3G155300, Prupe.4G144900, Prupe.4G145300, Prupe.4G203500, Prupe.4G203600, Prupe.4G276500
GO:0006749	BP	glutathione metabolic process	0.000998323	0.0248496	6.90943	16	Prupe.1G054900, Prupe.1G055000, Prupe.1G526000, Prupe.4G146000, Prupe.4G146100, Prupe.4G146200, Prupe.4G146400, Prupe.4G146800, Prupe.4G147000, Prupe.4G147100, Prupe.4G147200, Prupe.4G147300, Prupe.6G040700, Prupe.8G210300, Prupe.8G210400, Prupe.8G210500
GO:0016757	MF	transferase activity, transferring glycosyl groups	0.00110412	0.0268982	6.80871	55	Prupe.1G091100, Prupe.1G159700, Prupe.1G179000, Prupe.1G278500, Prupe.1G294000, Prupe.1G305600, Prupe.1G457800, Prupe.1G483200, Prupe.1G503400, Prupe.1G519500, Prupe.1G519600, Prupe.1G520300, Prupe.2G085300, Prupe.2G101700, Prupe.2G184700, Prupe.3G005100, Prupe.3G184700, Prupe.3G185100, Prupe.3G188500, Prupe.3G214200, Prupe.3G248200, Prupe.3G260000, Prupe.3G260100, Prupe.3G276500, Prupe.5G027700,…
GO:0008152	BP	metabolic process	0.00126767	0.0302391	6.67058	43	Prupe.1G110100, Prupe.1G169700, Prupe.1G251200, Prupe.1G309900, Prupe.1G331000, Prupe.1G352200, Prupe.1G372800, Prupe.1G380300, Prupe.1G513200, Prupe.2G092900, Prupe.2G175100, Prupe.2G181400, Prupe.2G301000, Prupe.2G314200, Prupe.3G005900, Prupe.3G048300, Prupe.3G086200, Prupe.3G210700, Prupe.3G221800, Prupe.3G223200, Prupe.4G164000, Prupe.4G221700, Prupe.4G255600, Prupe.4G261900, Prupe.4G262200,…
GO:0005975	BP	carbohydrate metabolic process	0.0013615	0.0318147	6.59917	61	Prupe.1G080500, Prupe.1G080600, Prupe.1G080700, Prupe.1G110100, Prupe.1G169700, Prupe.1G204700, Prupe.1G205600, Prupe.1G251200, Prupe.1G309900, Prupe.1G331000, Prupe.1G352200, Prupe.1G372800, Prupe.1G380300, Prupe.1G513200, Prupe.2G092900, Prupe.2G175100, Prupe.2G181400, Prupe.2G198100, Prupe.2G227600, Prupe.2G285300, Prupe.2G301000, Prupe.2G314200, Prupe.3G005100, Prupe.3G005900, Prupe.3G048300,…
GO:0004568	MF	chitinase activity	0.00149416	0.0342162	6.50619	8	Prupe.1G080500, Prupe.1G080600, Prupe.1G080700, Prupe.1G204000, Prupe.1G204700, Prupe.1G205600, Prupe.2G181400, Prupe.7G178500
GO:0042277	MF	peptide binding	0.00175649	0.0394349	6.34444	3	Prupe.1G457200, Prupe.1G457300, Prupe.3G044500
GO:0007166	BP	cell surface receptor signaling pathway	0.0019789	0.0427517	6.22521	14	Prupe.1G386400, Prupe.2G255300, Prupe.2G325000, Prupe.3G099400, Prupe.3G099500, Prupe.3G181200, Prupe.3G181400, Prupe.4G093000, Prupe.4G093100, Prupe.4G093300, Prupe.4G093500, Prupe.4G093600, Prupe.4G094100, Prupe.4G094300
GO:0009505	CC	plant-type cell wall	0.00194447	0.0427517	6.24276	14	Prupe.1G208600, Prupe.1G352200, Prupe.1G372800, Prupe.1G513200, Prupe.2G296000, Prupe.3G219700, Prupe.4G021100, Prupe.4G276800, Prupe.6G303100, Prupe.7G097600, Prupe.7G173700, Prupe.7G243400, Prupe.8G038900, Prupe.8G270800
GO:0043171	BP	peptide catabolic process	0.00229531	0.0486691	6.07689	3	Prupe.1G457200, Prupe.1G457300, Prupe.3G044500
GO:0008757	MF	S-adenosylmethionine-dependent methyltransferase activity	0.0024244	0.0504716	6.02217	15	Prupe.1G375700, Prupe.2G107200, Prupe.2G199600, Prupe.3G119100, Prupe.3G120400, Prupe.3G129000, Prupe.3G129200, Prupe.3G129600, Prupe.3G129800, Prupe.5G228500, Prupe.8G171000, Prupe.8G171100, Prupe.8G171400, Prupe.8G171900, Prupe.8G172000
GO:0005886	CC	plasma membrane	0.00332897	0.0662288	5.70509	126	Prupe.1G141500, Prupe.1G157800, Prupe.1G218800, Prupe.1G249000, Prupe.1G275300, Prupe.1G278700, Prupe.1G334800, Prupe.1G346200, Prupe.1G356000, Prupe.1G362600, Prupe.1G386400, Prupe.1G399800, Prupe.1G400300, Prupe.1G400600, Prupe.1G406300, Prupe.1G412700, Prupe.1G422200, Prupe.1G427800, Prupe.1G446400, Prupe.1G469000, Prupe.1G469200, Prupe.1G472500, Prupe.1G480500, Prupe.1G481600, Prupe.1G485400,…
GO:0080043	MF	quercetin 3-O-glucosyltransferase activity	0.00341266	0.0662288	5.68026	15	Prupe.1G519500, Prupe.1G519600, Prupe.1G519700, Prupe.1G520300, Prupe.3G188500, Prupe.6G008000, Prupe.6G008300, Prupe.6G008400, Prupe.6G189900, Prupe.6G190100, Prupe.6G190300, Prupe.6G190600, Prupe.8G135700, Prupe.8G150700, Prupe.8G186100
GO:0080044	MF	quercetin 7-O-glucosyltransferase activity	0.00341266	0.0662288	5.68026	15	Prupe.1G519500, Prupe.1G519600, Prupe.1G519700, Prupe.1G520300, Prupe.3G188500, Prupe.6G008000, Prupe.6G008300, Prupe.6G008400, Prupe.6G189900, Prupe.6G190100, Prupe.6G190300, Prupe.6G190600, Prupe.8G135700, Prupe.8G150700, Prupe.8G186100
GO:0004185	MF	serine-type carboxypeptidase activity	0.00331376	0.0662288	5.70967	9	Prupe.1G325200, Prupe.1G348100, Prupe.1G441000, Prupe.2G023900, Prupe.5G143500, Prupe.6G114600, Prupe.7G264200, Prupe.8G147500, Prupe.8G148400
GO:0007143	BP	female meiotic nuclear division	0.00389965	0.0744183	5.54687	3	Prupe.1G339600, Prupe.1G339700, Prupe.6G241500
GO:0003854	MF	3-beta-hydroxy-delta5-steroid dehydrogenase activity	0.00409001	0.0767714	5.49921	5	Prupe.1G063200, Prupe.2G021000, Prupe.2G185000, Prupe.3G241700, Prupe.I003000
GO:0030245	BP	cellulose catabolic process	0.00423647	0.0769962	5.46402	6	Prupe.1G331000, Prupe.4G221700, Prupe.5G118000, Prupe.7G167300, Prupe.8G005900, Prupe.8G085400
GO:0008810	MF	cellulase activity	0.00423647	0.0769962	5.46402	6	Prupe.1G331000, Prupe.4G221700, Prupe.5G118000, Prupe.7G167300, Prupe.8G005900, Prupe.8G085400
GO:0051753	MF	mannan synthase activity	0.00432638	0.0774016	5.44302	6	Prupe.3G214200, Prupe.5G027700, Prupe.6G024900, Prupe.6G025000, Prupe.6G025100, Prupe.7G119100
GO:0071446	BP	cellular response to salicylic acid stimulus	0.00441449	0.077763	5.42286	8	Prupe.3G135100, Prupe.3G135700, Prupe.3G154700, Prupe.3G155300, Prupe.4G144900, Prupe.4G145300, Prupe.4G203500, Prupe.4G203600
GO:0008061	MF	chitin binding	0.00458663	0.0795712	5.38461	7	Prupe.1G080500, Prupe.1G080600, Prupe.1G080700, Prupe.1G204000, Prupe.1G204700, Prupe.1G205600, Prupe.7G178500
GO:0038023	MF	signaling receptor activity	0.00478415	0.081759	5.34245	14	Prupe.1G127500, Prupe.1G258100, Prupe.1G399800, Prupe.1G400300, Prupe.1G400600, Prupe.1G412700, Prupe.1G446400, Prupe.2G043500, Prupe.2G105400, Prupe.2G105700, Prupe.4G056600, Prupe.4G171700, Prupe.4G171800, Prupe.7G106900
GO:0000272	BP	polysaccharide catabolic process	0.00578219	0.0959509	5.15297	7	Prupe.1G331000, Prupe.3G221800, Prupe.4G221700, Prupe.5G118000, Prupe.7G167300, Prupe.8G005900, Prupe.8G085400
GO:0051213	MF	dioxygenase activity	0.00573679	0.0959509	5.16086	16	Prupe.1G449100, Prupe.1G449200, Prupe.1G468100, Prupe.1G502300, Prupe.1G502500, Prupe.1G502700, Prupe.2G005300, Prupe.4G080700, Prupe.4G262900, Prupe.4G263100, Prupe.4G264400, Prupe.6G055300, Prupe.6G224300, Prupe.6G278400, Prupe.6G324100, Prupe.6G324200
GO:0030643	BP	cellular phosphate ion homeostasis	0.0072869	0.119193	4.92168	2	Prupe.3G310500, Prupe.5G237900
GO:0043086	BP	negative regulation of catalytic activity	0.00767293	0.122021	4.87006	13	Prupe.1G113800, Prupe.1G178400, Prupe.1G529500, Prupe.2G279700, Prupe.2G279800, Prupe.6G036700, Prupe.6G197400, Prupe.6G318500, Prupe.7G190700, Prupe.7G193700, Prupe.8G261300, Prupe.8G263900, Prupe.8G264100
GO:0004180	MF	carboxypeptidase activity	0.00760634	0.122021	4.87877	6	Prupe.1G325200, Prupe.1G348100, Prupe.1G441000, Prupe.5G143500, Prupe.6G114600, Prupe.7G264200
GO:0004857	MF	enzyme inhibitor activity	0.00854112	0.133967	4.76286	12	Prupe.1G113800, Prupe.1G178400, Prupe.1G529500, Prupe.2G279700, Prupe.2G279800, Prupe.6G197400, Prupe.6G318500, Prupe.7G190700, Prupe.7G193700, Prupe.8G261300, Prupe.8G263900, Prupe.8G264100
GO:0004040	MF	amidase activity	0.0091743	0.141954	4.69135	3	Prupe.4G282000, Prupe.4G282100, Prupe.5G138700
GO:0016320	BP	endoplasmic reticulum membrane fusion	0.0095028	0.145076	4.65617	3	Prupe.4G106500, Prupe.4G106600, Prupe.4G106900
GO:0016413	MF	O-acetyltransferase activity	0.0107353	0.161736	4.53422	9	Prupe.3G107900, Prupe.3G108000, Prupe.3G168700, Prupe.3G242500, Prupe.4G157100, Prupe.4G157500, Prupe.4G157600, Prupe.6G279700, Prupe.8G266500
GO:0030244	BP	cellulose biosynthetic process	0.0128718	0.191405	4.35272	6	Prupe.3G214200, Prupe.5G027700, Prupe.5G185500, Prupe.6G024900, Prupe.6G025000, Prupe.6G025100
GO:0042742	BP	defense response to bacterium	0.0137854	0.19576	4.28415	14	Prupe.1G157800, Prupe.3G094600, Prupe.4G027800, Prupe.4G142300, Prupe.4G175600, Prupe.4G241200, Prupe.4G276500, Prupe.6G024000, Prupe.6G261500, Prupe.6G282700, Prupe.6G286000, Prupe.6G343900, Prupe.8G117500, Prupe.8G235600
GO:0016104	BP	triterpenoid biosynthetic process	0.0138485	0.19576	4.27958	3	Prupe.3G026200, Prupe.3G026400, Prupe.3G026700
GO:0000250	MF	lanosterol synthase activity	0.0138485	0.19576	4.27958	3	Prupe.3G026200, Prupe.3G026400, Prupe.3G026700
GO:0042300	MF	beta-amyrin synthase activity	0.0138485	0.19576	4.27958	3	Prupe.3G026200, Prupe.3G026400, Prupe.3G026700
GO:0046983	MF	protein dimerization activity	0.0141627	0.19776	4.25714	35	Prupe.1G030500, Prupe.1G150700, Prupe.1G371300, Prupe.1G375000, Prupe.1G524500, Prupe.1G533700, Prupe.1G538700, Prupe.1G540400, Prupe.2G047700, Prupe.2G097200, Prupe.2G170100, Prupe.2G198800, Prupe.2G199600, Prupe.3G119100, Prupe.3G120400, Prupe.3G129000, Prupe.3G129200, Prupe.3G129600, Prupe.3G129800, Prupe.3G307800, Prupe.5G087900, Prupe.5G127100, Prupe.5G130400, Prupe.5G130500, Prupe.5G130600,…
GO:0042542	BP	response to hydrogen peroxide	0.0147382	0.198735	4.21731	7	Prupe.1G407100, Prupe.2G243800, Prupe.3G005100, Prupe.5G237900, Prupe.6G062500, Prupe.6G066100, Prupe.6G066300
GO:0050660	MF	flavin adenine dinucleotide binding	0.0147392	0.198735	4.21725	18	Prupe.1G032800, Prupe.1G093800, Prupe.1G171200, Prupe.1G275800, Prupe.1G468500, Prupe.2G072100, Prupe.3G049600, Prupe.4G097500, Prupe.4G098500, Prupe.4G099500, Prupe.4G157300, Prupe.6G181800, Prupe.6G216100, Prupe.7G208500, Prupe.7G209800, Prupe.7G231200, Prupe.8G177000, Prupe.8G219700
GO:0046524	MF	sucrose-phosphate synthase activity	0.0147532	0.198735	4.21629	2	Prupe.1G159700, Prupe.1G483200
GO:0006820	BP	anion transport	0.0171329	0.228107	4.06675	3	Prupe.1G472500, Prupe.3G077900, Prupe.7G202700
GO:0009877	BP	nodulation	0.018457	0.237452	3.99231	2	Prupe.1G485400, Prupe.1G485600
GO:0005901	CC	caveola	0.018457	0.237452	3.99231	2	Prupe.1G485400, Prupe.1G485600
GO:0044853	CC	plasma membrane raft	0.018457	0.237452	3.99231	2	Prupe.1G485400, Prupe.1G485600
GO:0016747	MF	transferase activity, transferring acyl groups other than amino-acyl groups	0.0188616	0.239961	3.97063	21	Prupe.1G016700, Prupe.1G236600, Prupe.1G533000, Prupe.2G246800, Prupe.3G098400, Prupe.3G101400, Prupe.3G101600, Prupe.4G140700, Prupe.4G252100, Prupe.4G253000, Prupe.5G017800, Prupe.5G017900, Prupe.5G018100, Prupe.6G271700, Prupe.7G130400, Prupe.7G130500, Prupe.7G130600, Prupe.8G000100, Prupe.8G042200, Prupe.8G147500, Prupe.8G148400
GO:0007140	BP	male meiotic nuclear division	0.0193365	0.2433	3.94576	3	Prupe.1G339600, Prupe.1G339700, Prupe.6G241500
GO:0008115	MF	sarcosine oxidase activity	0.0210005	0.261364	3.86321	2	Prupe.1G458800, Prupe.1G458900
GO:0006694	BP	steroid biosynthetic process	0.0221393	0.272575	3.8104	5	Prupe.1G063200, Prupe.2G021000, Prupe.2G185000, Prupe.3G241700, Prupe.I003000
GO:0005216	MF	ion channel activity	0.0229928	0.280072	3.77257	8	Prupe.1G162800, Prupe.1G472600, Prupe.3G099200, Prupe.3G231900, Prupe.3G259100, Prupe.4G109500, Prupe.4G191200, Prupe.8G097600
GO:0006811	BP	ion transport	0.0235451	0.28378	3.74884	26	Prupe.1G162800, Prupe.1G399800, Prupe.1G400300, Prupe.1G400600, Prupe.1G412700, Prupe.1G472600, Prupe.2G043500, Prupe.2G105400, Prupe.2G105700, Prupe.2G128800, Prupe.3G052200, Prupe.3G099200, Prupe.3G231900, Prupe.3G259100, Prupe.4G056600, Prupe.4G109500, Prupe.4G171700, Prupe.4G171800, Prupe.4G191200, Prupe.5G236500, Prupe.6G005500, Prupe.6G007600, Prupe.6G286200, Prupe.7G106900, Prupe.7G202700,…
GO:0042626	MF	ATPase-coupled transmembrane transporter activity	0.0239277	0.285387	3.73272	12	Prupe.1G104300, Prupe.1G236100, Prupe.2G305600, Prupe.3G051600, Prupe.3G051700, Prupe.3G059900, Prupe.4G186700, Prupe.5G112700, Prupe.5G229600, Prupe.6G234500, Prupe.I000500, Prupe.I000700
GO:0042744	BP	hydrogen peroxide catabolic process	0.025992	0.303682	3.64997	13	Prupe.3G219700, Prupe.4G021100, Prupe.4G276800, Prupe.6G013200, Prupe.6G013500, Prupe.6G044000, Prupe.6G192000, Prupe.6G223400, Prupe.7G079100, Prupe.7G171100, Prupe.7G173700, Prupe.7G243400, Prupe.8G038900
GO:0052793	MF	pectin acetylesterase activity	0.0258064	0.303682	3.65713	3	Prupe.1G208600, Prupe.2G296000, Prupe.6G303100
GO:0016298	MF	lipase activity	0.0274354	0.317308	3.59592	6	Prupe.1G312200, Prupe.1G361900, Prupe.1G362100, Prupe.3G032600, Prupe.3G033300, Prupe.3G033500
GO:0055085	BP	transmembrane transport	0.0297315	0.328472	3.51555	76	Prupe.1G104300, Prupe.1G162800, Prupe.1G236100, Prupe.1G249000, Prupe.1G320200, Prupe.1G346200, Prupe.1G346300, Prupe.1G356000, Prupe.1G472500, Prupe.1G472600, Prupe.1G490100, Prupe.1G490200, Prupe.1G491000, Prupe.1G491300, Prupe.1G500600, Prupe.1G524800, Prupe.1G525200, Prupe.2G024100, Prupe.2G241800, Prupe.2G274200, Prupe.2G299200, Prupe.2G305600, Prupe.3G009400, Prupe.3G051600, Prupe.3G051700,…
GO:0071555	BP	cell wall organization	0.0301806	0.328472	3.50056	23	Prupe.1G110100, Prupe.1G169700, Prupe.1G208600, Prupe.1G251200, Prupe.1G278500, Prupe.2G296000, Prupe.3G005900, Prupe.3G214200, Prupe.3G223200, Prupe.4G261900, Prupe.4G262200, Prupe.5G027700, Prupe.5G195200, Prupe.6G024900, Prupe.6G025000, Prupe.6G025100, Prupe.6G202500, Prupe.6G239800, Prupe.6G303100, Prupe.6G318500, Prupe.7G225000, Prupe.7G269400, Prupe.8G152500
GO:0031347	BP	regulation of defense response	0.029701	0.328472	3.51657	8	Prupe.3G135100, Prupe.3G135700, Prupe.3G154700, Prupe.3G155300, Prupe.4G144900, Prupe.4G145300, Prupe.4G203500, Prupe.4G203600
GO:0015833	BP	peptide transport	0.0304758	0.328472	3.49082	3	Prupe.6G026100, Prupe.6G026200, Prupe.6G026300
GO:0031090	CC	organelle membrane	0.0303068	0.328472	3.49638	2	Prupe.1G457300, Prupe.3G044500
GO:0000166	MF	nucleotide binding	0.0299979	0.328472	3.50663	137	Prupe.1G074000, Prupe.1G083300, Prupe.1G104300, Prupe.1G145600, Prupe.1G168400, Prupe.1G236100, Prupe.1G333900, Prupe.1G342300, Prupe.1G347900, Prupe.1G368500, Prupe.1G386400, Prupe.1G419600, Prupe.1G427800, Prupe.1G429700, Prupe.1G444700, Prupe.1G469000, Prupe.1G469200, Prupe.1G502100, Prupe.1G505700, Prupe.1G556500, Prupe.1G572400, Prupe.2G004700, Prupe.2G044400, Prupe.2G048700, Prupe.2G061800,…
GO:0005452	MF	inorganic anion exchanger activity	0.0299497	0.328472	3.50824	2	Prupe.1G472500, Prupe.3G077900
GO:0008447	MF	L-ascorbate oxidase activity	0.0306957	0.328472	3.48363	2	Prupe.4G131900, Prupe.6G179500
[truncated: 1,038 more rows]

## Sheet: TNR_vs_TRR
		Supplementary Table S6. Summary for the gene ontology (GO) enrichment analysis of differentially expressed genes (DEGs).
[truncated: 932 more rows]
