# Supplementary material for: Morphological, Physiological, Biochemical, and Transcriptome Studies Reveal The Importance of Different Component Traits During Salinity Stress in Prunus
Source: Research Square preprint supplement (doi:10.21203/rs.3.rs-659140/v1), 2021-07-07
Supplement: Supplementary file 3 [file 40045ca5de0252d6573c85e1.xlsx]

## Sheet: TNLvsCNL
Supplementary Table S3. Expression comparison and gene ontology (GO) annotation of differentially expressed genes DEGs. Different sheets represent different comparisons.
Gene.ID	log2FoldChange	padj	Gene Length	NR Description	GO IDs	GO Names
Prupe.5G218300	-4.44424	0.000152515	1049	---NA---	#N/A	#N/A
Prupe.1G104100	-2.84812	0.000403026	6718	ABC transporter B family member 11	GO:0055085, GO:0005524, GO:0000166, GO:0016020, GO:0016021, GO:0016887, GO:0042626	transmembrane transport, ATP binding, nucleotide binding, membrane, integral component of membrane, ATPase activity, ATPase-coupled transmembrane transporter activity
Prupe.8G066000	-5.91434	0.00061647	618	classical arabinogalactan protein 9-like	#N/A	#N/A
Prupe.3G082100	-4.73118	0.00138547	1873	metallothiol transferase FosB	#N/A	#N/A
Prupe.7G246500	-6.63165	0.00160091	2307	---NA---	GO:0009055, GO:0022900, GO:0046658	electron transfer activity, electron transport chain, anchored component of plasma membrane
Prupe.2G002500	-5.04769	0.00180736	559	uncharacterized LOC18786344	GO:0016020, GO:0016021	membrane, integral component of membrane
Prupe.1G033900	-5.14336	0.00403819	4468	---NA---	GO:0016020, GO:0016021, GO:0016740, GO:0016757, GO:0016760, GO:0030244, GO:0097502, GO:0071555, GO:0005886, GO:0005802, GO:0009833, GO:0051753	membrane, integral component of membrane, transferase activity, transferase activity, transferring glycosyl groups, cellulose synthase (UDP-forming) activity, cellulose biosynthetic process, mannosylation, cell wall organization, plasma membrane, trans-Golgi network, plant-type primary cell wall biogenesis, mannan synthase activity
Prupe.2G160400	-4.04837	0.00403819	2630	---NA---	GO:0016491, GO:0055114, GO:0016020	oxidoreductase activity, oxidation-reduction process, membrane
Prupe.7G270300	-2.75576	0.00403819	928	uncharacterized LOC18771874	#N/A	#N/A
Prupe.2G098700	-4.52752	0.00465102	4078	non-specific phospholipase C3	GO:0003824, GO:0016787, GO:0016788, GO:0009395	catalytic activity, hydrolase activity, hydrolase activity, acting on ester bonds, phospholipid catabolic process
Prupe.1G327700	-8.31021	0.00806625	1656	MLP-like protein 328	GO:0006952, GO:0009607	defense response, response to biotic stimulus
Prupe.2G080900	6.65117	0.00806625	4532	ankyrin repeat-containing protein NPR4	GO:0016020, GO:0016021, GO:0005515	membrane, integral component of membrane, protein binding
Prupe.3G189700	-5.73878	0.00884641	2520	7-deoxyloganetin glucosyltransferase-like	GO:0016740, GO:0016757, GO:0016758, GO:0008194, GO:0080043, GO:0080044	transferase activity, transferase activity, transferring glycosyl groups, transferase activity, transferring hexosyl groups, UDP-glycosyltransferase activity, quercetin 3-O-glucosyltransferase activity, quercetin 7-O-glucosyltransferase activity
Prupe.1G312500	-8.21864	0.00941738	1204	VQ motif-containing protein 20-like	GO:0005634	nucleus
Prupe.2G306100	-2.88496	0.0101173	3320	probable inactive receptor kinase At4g23740	GO:0005524, GO:0016020, GO:0016021, GO:0004672, GO:0006468, GO:0005515	ATP binding, membrane, integral component of membrane, protein kinase activity, protein phosphorylation, protein binding
Prupe.4G097000	-9.204	0.0101173	1589	berberine bridge enzyme-like 26	GO:0016491, GO:0055114, GO:0050660, GO:0071949	oxidoreductase activity, oxidation-reduction process, flavin adenine dinucleotide binding, FAD binding
Prupe.7G141400	2.97378	0.0101173	2203	salicylic acid-binding protein 2	GO:0080030, GO:0080031, GO:0080032, GO:0009694, GO:0009696	methyl indole-3-acetate esterase activity, methyl salicylate esterase activity, methyl jasmonate esterase activity, jasmonic acid metabolic process, salicylic acid metabolic process
Prupe.8G065600	-4.732	0.0101173	422	classical arabinogalactan protein 9-like	#N/A	#N/A
Prupe.1G104400	-3.63664	0.0120067	6726	ABC transporter B family member 11	GO:0055085, GO:0005524, GO:0000166, GO:0016020, GO:0016021, GO:0016887, GO:0042626	transmembrane transport, ATP binding, nucleotide binding, membrane, integral component of membrane, ATPase activity, ATPase-coupled transmembrane transporter activity
Prupe.1G113100	-4.00346	0.0120067	1490	desiccation-related protein PCC13-62	#N/A	#N/A
Prupe.6G217800	-4.73715	0.0120067	4681	ACT domain-containing protein ACR1	#N/A	#N/A
Prupe.1G440100	-6.02921	0.0120258	2321	patatin-like protein 2	GO:0016787, GO:0016042, GO:0006629, GO:0004620, GO:0047372	hydrolase activity, lipid catabolic process, lipid metabolic process, phospholipase activity, acylglycerol lipase activity
Prupe.1G570800	-4.06315	0.0120258	1958	11S globulin seed storage protein 2	GO:0016020, GO:0016021, GO:0045735	membrane, integral component of membrane, nutrient reservoir activity
Prupe.4G099200	-5.44917	0.0126684	3431	---NA---	GO:0016491, GO:0055114, GO:0050660, GO:0071949	oxidoreductase activity, oxidation-reduction process, flavin adenine dinucleotide binding, FAD binding
Prupe.7G268900	-4.11137	0.0142326	2637	2-alkenal reductase (NADP(+)-dependent)	GO:0055114, GO:0016491, GO:0032440	oxidation-reduction process, oxidoreductase activity, 2-alkenal reductase [NAD(P)+] activity
Prupe.8G121700	-3.9235	0.0142326	947	probable carboxylesterase 12	GO:0016787	hydrolase activity
Prupe.1G230800	-5.87773	0.0166038	2089	geraniol 8-hydroxylase	GO:0055114, GO:0016491, GO:0046872, GO:0004497, GO:0005506, GO:0016705, GO:0020037	oxidation-reduction process, oxidoreductase activity, metal ion binding, monooxygenase activity, iron ion binding, oxidoreductase activity, acting on paired donors, with incorporation or reduction of molecular oxygen, heme binding
Prupe.1G294500	-4.58347	0.0179665	1236	ribosome-inactivating protein alpha-trichosanthin-like	GO:0016787, GO:0006952, GO:0030598, GO:0090729, GO:0017148, GO:0035821	hydrolase activity, defense response, rRNA N-glycosylase activity, toxin activity, negative regulation of translation, modulation of process of other organism
Prupe.6G227100	-6.39351	0.0179665	2201	cytochrome P450 81E8	GO:0055114, GO:0016491, GO:0016020, GO:0016021, GO:0046872, GO:0004497, GO:0005506, GO:0016705, GO:0020037, GO:0016709	oxidation-reduction process, oxidoreductase activity, membrane, integral component of membrane, metal ion binding, monooxygenase activity, iron ion binding, oxidoreductase activity, acting on paired donors, with incorporation or reduction of molecular oxygen, heme binding, oxidoreductase activity, acting on paired donors, with incorporation or reduction of molecular oxygen, NAD(P)H as one donor, …
Prupe.6G357200	-4.89701	0.0179665	2668	wall-associated receptor kinase-like 1	GO:0005886, GO:0005524, GO:0000166, GO:0016301, GO:0016310, GO:0016020, GO:0016021, GO:0016740, GO:0004672, GO:0006468, GO:0004674, GO:0007166	plasma membrane, ATP binding, nucleotide binding, kinase activity, phosphorylation, membrane, integral component of membrane, transferase activity, protein kinase activity, protein phosphorylation, protein serine/threonine kinase activity, cell surface receptor signaling pathway
Prupe.5G236300	-4.38432	0.0200862	2834	glutamine synthetase nodule isozyme	GO:0003824, GO:0000166, GO:0005524, GO:0006807, GO:0016874, GO:0004356, GO:0006542, GO:0005737	catalytic activity, nucleotide binding, ATP binding, nitrogen compound metabolic process, ligase activity, glutamate-ammonia ligase activity, glutamine biosynthetic process, cytoplasm
Prupe.6G136700	-8.60329	0.0200862	3088	beta-glucosidase 12	GO:0005975, GO:0016787, GO:0004553, GO:0008422, GO:0009651, GO:0019762	carbohydrate metabolic process, hydrolase activity, hydrolase activity, hydrolyzing O-glycosyl compounds, beta-glucosidase activity, response to salt stress, glucosinolate catabolic process
Prupe.2G055300	3.50444	0.0237056	2945	---NA---	#N/A	#N/A
Prupe.2G278200	-8.29661	0.0237056	2069	pectinesterase 2	GO:0016787, GO:0071555, GO:0005576, GO:0045490, GO:0004857, GO:0030599, GO:0045330, GO:0042545, GO:0043086, GO:0005618, GO:0046910	hydrolase activity, cell wall organization, extracellular region, pectin catabolic process, enzyme inhibitor activity, pectinesterase activity, aspartyl esterase activity, cell wall modification, negative regulation of catalytic activity, cell wall, pectinesterase inhibitor activity
Prupe.1G072100	-7.07871	0.0239049	3179	plant intracellular Ras-group-related LRR protein 6	GO:0005515	protein binding
Prupe.6G333400	-2.56151	0.0244949	6166	protein BONZAI 3	GO:0005544, GO:0060548, GO:0005886, GO:0071277	calcium-dependent phospholipid binding, negative regulation of cell death, plasma membrane, cellular response to calcium ion
Prupe.2G161400	-4.76835	0.0275274	2003	---NA---	GO:0016491, GO:0055114, GO:0016020	oxidoreductase activity, oxidation-reduction process, membrane
Prupe.6G049600	-5.16932	0.0275274	1968	UDP-glycosyltransferase 87A1	GO:0016740, GO:0016758, GO:0008194	transferase activity, transferase activity, transferring hexosyl groups, UDP-glycosyltransferase activity
Prupe.4G146400	-4.40818	0.03098	1526	probable glutathione S-transferase	GO:0006749, GO:0005737, GO:0004364, GO:0005515	glutathione metabolic process, cytoplasm, glutathione transferase activity, protein binding
Prupe.1G227700	-6.53619	0.0312255	2802	---NA---	#N/A	#N/A
Prupe.5G044500	-2.28308	0.0312255	1875	---NA---	#N/A	#N/A
Prupe.6G305100	-5.73317	0.0312255	1493	probable L-cysteine desulfhydrase, chloroplastic	GO:0003824	catalytic activity
Prupe.3G281700	-5.00975	0.0318078	522	---NA---	#N/A	#N/A
Prupe.6G133800	2.42216	0.0319619	1949	uncharacterized LOC109949513	GO:0003700, GO:0006355	DNA-binding transcription factor activity, regulation of transcription, DNA-templated
Prupe.1G316400	-3.54324	0.0342147	531	non-specific lipid-transfer protein 2	GO:0006869, GO:0008289	lipid transport, lipid binding
Prupe.2G206600	-5.94433	0.0345586	2331	---NA---	GO:0016020, GO:0016021, GO:0002239, GO:0009506	membrane, integral component of membrane, response to oomycetes, plasmodesma
Prupe.4G245400	-6.87073	0.0345586	1859	extensin-like	#N/A	#N/A
Prupe.7G128500	-3.37723	0.0366891	2364	---NA---	GO:0005737, GO:0005524, GO:0000166, GO:0016740, GO:0046872, GO:0004478, GO:0006556, GO:0006730, GO:0005829	cytoplasm, ATP binding, nucleotide binding, transferase activity, metal ion binding, methionine adenosyltransferase activity, S-adenosylmethionine biosynthetic process, one-carbon metabolic process, cytosol
Prupe.1G032000	-7.8822	0.0375921	442	---NA---	GO:0004867, GO:0009611, GO:0010951, GO:0030414, GO:0010466	serine-type endopeptidase inhibitor activity, response to wounding, negative regulation of endopeptidase activity, peptidase inhibitor activity, negative regulation of peptidase activity
Prupe.1G269200	-6.71022	0.0375921	3324	probable WRKY transcription factor 36	GO:0005634, GO:0003677, GO:0006355, GO:0003700, GO:0043565	nucleus, DNA binding, regulation of transcription, DNA-templated, DNA-binding transcription factor activity, sequence-specific DNA binding
Prupe.1G469000	-3.74401	0.0375921	3452	cysteine-rich receptor-like protein kinase 26	GO:0005524, GO:0000166, GO:0016301, GO:0016310, GO:0016020, GO:0016021, GO:0016740, GO:0004672, GO:0006468, GO:0004674, GO:0005886	ATP binding, nucleotide binding, kinase activity, phosphorylation, membrane, integral component of membrane, transferase activity, protein kinase activity, protein phosphorylation, protein serine/threonine kinase activity, plasma membrane
Prupe.3G185000	-2.6364	0.0375921	1567	UDP-glycosyltransferase 71A16	GO:0016740, GO:0016757, GO:0016758, GO:0008194	transferase activity, transferase activity, transferring glycosyl groups, transferase activity, transferring hexosyl groups, UDP-glycosyltransferase activity
Prupe.4G027900	-3.09189	0.0375921	2954	cysteine-rich receptor-like protein kinase 29	GO:0005524, GO:0000166, GO:0016301, GO:0016310, GO:0016020, GO:0016021, GO:0016740, GO:0004672, GO:0006468, GO:0005886, GO:0004674	ATP binding, nucleotide binding, kinase activity, phosphorylation, membrane, integral component of membrane, transferase activity, protein kinase activity, protein phosphorylation, plasma membrane, protein serine/threonine kinase activity
Prupe.6G324100	-3.31132	0.0375921	4220	probable linoleate 9S-lipoxygenase 5	GO:0005737, GO:0055114, GO:0016491, GO:0046872, GO:0016702, GO:0051213, GO:0006633, GO:0031408, GO:0006629, GO:0006631, GO:0034440, GO:0005515	cytoplasm, oxidation-reduction process, oxidoreductase activity, metal ion binding, oxidoreductase activity, acting on single donors with incorporation of molecular oxygen, incorporation of two atoms of oxygen, dioxygenase activity, fatty acid biosynthetic process, oxylipin biosynthetic process, lipid metabolic process, fatty acid metabolic process, lipid oxidation, protein binding
Prupe.5G163700	-3.78754	0.0400991	2093	cytochrome P450 71A1	GO:0055114, GO:0016491, GO:0046872, GO:0004497, GO:0005506, GO:0016705, GO:0020037	oxidation-reduction process, oxidoreductase activity, metal ion binding, monooxygenase activity, iron ion binding, oxidoreductase activity, acting on paired donors, with incorporation or reduction of molecular oxygen, heme binding
Prupe.1G543700	-5.91689	0.0401871	2064	2-alkenal reductase (NADP(+)-dependent)	GO:0055114, GO:0032440	oxidation-reduction process, 2-alkenal reductase [NAD(P)+] activity
Prupe.1G199700	-4.14948	0.0435727	5419	uncharacterized LOC18791918	GO:0016020, GO:0016021	membrane, integral component of membrane
Prupe.2G137300	-5.45703	0.0489576	2891	SPX domain-containing protein 3	GO:0016036	cellular response to phosphate starvation
Prupe.4G230400	-8.00993	0.0489576	1592	berberine bridge enzyme-like 17	GO:0016491, GO:0055114, GO:0050660, GO:0071949	oxidoreductase activity, oxidation-reduction process, flavin adenine dinucleotide binding, FAD binding
Prupe.1G032800	-7.50161	0.0492158	1854	berberine bridge enzyme-like 17	GO:0016491, GO:0055114, GO:0050660, GO:0071949	oxidoreductase activity, oxidation-reduction process, flavin adenine dinucleotide binding, FAD binding
Prupe.1G149700	-3.12855	0.0492158	3991	endo-1,3;1,4-beta-D-glucanase	GO:0016787	hydrolase activity

## Sheet: TRLvsCRL
Gene.ID	log2FoldChange	padj	Gene Length	NR Description	GO IDs	GO Names
Prupe.6G138700	-14.9342	0.00011232	1997	secoisolariciresinol dehydrogenase	GO:0016491, GO:0055114	oxidoreductase activity, oxidation-reduction process
Prupe.2G080900	-6.26962	0.0318085	4532	ankyrin repeat-containing protein NPR4	GO:0016020, GO:0016021, GO:0005515	membrane, integral component of membrane, protein binding
Prupe.4G034400	-4.14677	0.0372595	2050	putative cyclin-D6-1	GO:0007049, GO:0051301, GO:0005634, GO:0051726, GO:0005737, GO:0000079, GO:0000307, GO:0016538, GO:0044772	cell cycle, cell division, nucleus, regulation of cell cycle, cytoplasm, regulation of cyclin-dependent protein serine/threonine kinase activity, cyclin-dependent protein kinase holoenzyme complex, cyclin-dependent protein serine/threonine kinase regulator activity, mitotic cell cycle phase transition
Prupe.7G168100	-3.24259	0.0372595	1931	---NA---	#N/A	#N/A
Prupe.3G242700	-2.7453	0.0490856	4188	uncharacterized LOC18784304	GO:0046872	metal ion binding
Prupe.1G219000	-2.65699	0.0390439	2088	putative uncharacterized protein DDB_G0284695	GO:0005515	protein binding
Prupe.3G178400	-2.52968	0.0318085	3582	protein JASON	GO:0007142	male meiosis II
Prupe.1G350700	-2.45056	0.0390439	1873	high mobility group B protein 7	GO:0005634, GO:0003677, GO:0010197	nucleus, DNA binding, polar nucleus fusion
Prupe.1G032800	14.5883	3.5089e-05	1854	berberine bridge enzyme-like 17	GO:0016491, GO:0055114, GO:0050660, GO:0071949	oxidoreductase activity, oxidation-reduction process, flavin adenine dinucleotide binding, FAD binding

## Sheet: TNRvsCNR
Gene.ID	log2FoldChange	padj	Gene Length	NR Description	GO IDs	GO Names
Prupe.6G354100	-27.78	4.04931e-06	2723	GDSL esterase/lipase LTL1	GO:0016788, GO:0010226, GO:0042538, GO:0009751	hydrolase activity, acting on ester bonds, response to lithium ion, hyperosmotic salinity response, response to salicylic acid
Prupe.3G131700	-2.34507	0.000634686	1723	---NA---	#N/A	#N/A
Prupe.6G063000	-3.19475	0.000634686	1958	uncharacterized LOC18771938	#N/A	#N/A
Prupe.5G090000	3.51707	0.00084812	1169	---NA---	GO:0005634, GO:0003677, GO:0006355, GO:0003700, GO:0006351	nucleus, DNA binding, regulation of transcription, DNA-templated, DNA-binding transcription factor activity, transcription, DNA-templated
Prupe.7G219500	2.41765	0.00101413	4569	receptor-like protein kinase 5	GO:0005524, GO:0000166, GO:0016301, GO:0016310, GO:0016020, GO:0016021, GO:0016740, GO:0004672, GO:0006468, GO:0004674, GO:0005515	ATP binding, nucleotide binding, kinase activity, phosphorylation, membrane, integral component of membrane, transferase activity, protein kinase activity, protein phosphorylation, protein serine/threonine kinase activity, protein binding
Prupe.8G153700	3.92013	0.00117709	488	pathogenesis-related protein 1	GO:0006952, GO:0009607, GO:0005576, GO:0005615	defense response, response to biotic stimulus, extracellular region, extracellular space
Prupe.4G072700	6.39058	0.00130089	2244	protein SRG1	GO:0055114, GO:0016491, GO:0046872	oxidation-reduction process, oxidoreductase activity, metal ion binding
Prupe.7G194400	4.427	0.00263737	1010	ethylene-responsive transcription factor ERF017	GO:0005634, GO:0003677, GO:0006355, GO:0003700, GO:0006351	nucleus, DNA binding, regulation of transcription, DNA-templated, DNA-binding transcription factor activity, transcription, DNA-templated
Prupe.1G092400	2.07636	0.00304791	2339	(R)-mandelonitrile lyase 2	GO:0055114, GO:0050660, GO:0016829, GO:0016614, GO:0046593	oxidation-reduction process, flavin adenine dinucleotide binding, lyase activity, oxidoreductase activity, acting on CH-OH group of donors, mandelonitrile lyase activity
Prupe.8G153800	2.23314	0.0039126	641	---NA---	GO:0006952, GO:0009607, GO:0005576, GO:0005615	defense response, response to biotic stimulus, extracellular region, extracellular space
Prupe.6G343900	2.91542	0.0078087	972	pathogenesis-related protein PR-4-like	GO:0050832, GO:0042742	defense response to fungus, defense response to bacterium
Prupe.8G205700	-2.78249	0.00915623	4512	---NA---	#N/A	#N/A
Prupe.1G230500	-5.50821	0.0118254	2217	geraniol 8-hydroxylase	GO:0055114, GO:0016491, GO:0046872, GO:0004497, GO:0005506, GO:0016705, GO:0020037	oxidation-reduction process, oxidoreductase activity, metal ion binding, monooxygenase activity, iron ion binding, oxidoreductase activity, acting on paired donors, with incorporation or reduction of molecular oxygen, heme binding
Prupe.1G237800	-3.55225	0.0157659	1164	small heat shock protein, chloroplastic	#N/A	#N/A
Prupe.1G356000	3.10253	0.0157659	2459	lysine histidine transporter-like 8	GO:0016020, GO:0016021, GO:0009734, GO:0055085, GO:0005886, GO:0015293, GO:0006865	membrane, integral component of membrane, auxin-activated signaling pathway, transmembrane transport, plasma membrane, symporter activity, amino acid transport
Prupe.6G360300	-2.18484	0.0168228	2116	auxin efflux carrier component 5	GO:0055085, GO:0016020, GO:0016021, GO:0009734, GO:0005783, GO:0005886, GO:0009926, GO:0010329, GO:0010252, GO:0010315, GO:0080161, GO:0009555, GO:0080162	transmembrane transport, membrane, integral component of membrane, auxin-activated signaling pathway, endoplasmic reticulum, plasma membrane, auxin polar transport, auxin efflux transmembrane transporter activity, auxin homeostasis, auxin efflux, auxin transmembrane transporter activity, pollen development, intracellular auxin transport
Prupe.3G303600	2.42433	0.0222862	805	calcium-binding protein CML38	GO:0005509	calcium ion binding
Prupe.7G255400	-2.87796	0.0244496	923	---NA---	#N/A	#N/A
Prupe.6G186000	-2.00507	0.0249425	1888	probable xyloglucan galactosyltransferase GT17	GO:0005794, GO:0016020, GO:0016021, GO:0016757, GO:0006486, GO:0000139	Golgi apparatus, membrane, integral component of membrane, transferase activity, transferring glycosyl groups, protein glycosylation, Golgi membrane
Prupe.8G125100	3.51809	0.0253788	828	ethylene-responsive transcription factor ERF109	GO:0005634, GO:0003677, GO:0006355, GO:0003700, GO:0006351	nucleus, DNA binding, regulation of transcription, DNA-templated, DNA-binding transcription factor activity, transcription, DNA-templated
Prupe.8G186200	2.14583	0.0253788	2024	UDP-glycosyltransferase 74E2	GO:0016740, GO:0016757, GO:0016758, GO:0008194, GO:0080043, GO:0080044	transferase activity, transferase activity, transferring glycosyl groups, transferase activity, transferring hexosyl groups, UDP-glycosyltransferase activity, quercetin 3-O-glucosyltransferase activity, quercetin 7-O-glucosyltransferase activity
Prupe.4G225600	-2.08876	0.0268207	2894	UPF0272 protein Desal_0487	#N/A	#N/A
Prupe.6G038200	3.36766	0.0297477	3284	cytochrome P450 714C2	GO:0055114, GO:0016491, GO:0016020, GO:0016021, GO:0046872, GO:0004497, GO:0005506, GO:0016705, GO:0020037	oxidation-reduction process, oxidoreductase activity, membrane, integral component of membrane, metal ion binding, monooxygenase activity, iron ion binding, oxidoreductase activity, acting on paired donors, with incorporation or reduction of molecular oxygen, heme binding
Prupe.2G130400	2.76857	0.0302783	3099	receptor-like protein 12	GO:0005515	protein binding
Prupe.2G250900	2.31511	0.0306847	2952	probable 2-oxoglutarate-dependent dioxygenase At5g05600	GO:0055114, GO:0016491, GO:0046872, GO:0051213	oxidation-reduction process, oxidoreductase activity, metal ion binding, dioxygenase activity
Prupe.1G051300	-2.66804	0.0328733	1282	myb-related protein 305	GO:0005634, GO:0003677, GO:0043565, GO:0006355	nucleus, DNA binding, sequence-specific DNA binding, regulation of transcription, DNA-templated
Prupe.6G105800	2.89667	0.0328733	883	kiwellin	#N/A	#N/A
Prupe.3G245400	-2.80962	0.0350681	765	---NA---	GO:0016020, GO:0016021, GO:0080143	membrane, integral component of membrane, regulation of amino acid export
Prupe.3G215600	2.77385	0.0350897	825	dirigent protein 22	GO:0005576, GO:0048046	extracellular region, apoplast
Prupe.6G189900	2.74466	0.0350897	2767	7-deoxyloganetin glucosyltransferase-like	GO:0016740, GO:0016757, GO:0016758, GO:0008194, GO:0080043, GO:0080044	transferase activity, transferase activity, transferring glycosyl groups, transferase activity, transferring hexosyl groups, UDP-glycosyltransferase activity, quercetin 3-O-glucosyltransferase activity, quercetin 7-O-glucosyltransferase activity
Prupe.8G142100	-2.14998	0.0350897	1188	LOB domain-containing protein 38	GO:0010468	regulation of gene expression
Prupe.1G121000	-2.56687	0.038278	756	heterogeneous nuclear ribonucleoprotein A2 homolog 1	#N/A	#N/A
Prupe.2G020700	3.42923	0.0400609	6159	tetraketide alpha-pyrone reductase 1	GO:0003824, GO:0016616, GO:0055114, GO:0003854, GO:0006694, GO:0050662	catalytic activity, oxidoreductase activity, acting on the CH-OH group of donors, NAD or NADP as acceptor, oxidation-reduction process, 3-beta-hydroxy-delta5-steroid dehydrogenase activity, steroid biosynthetic process, obsolete coenzyme binding
Prupe.1G181700	4.6521	0.0411378	3519	---NA---	#N/A	#N/A
Prupe.1G169300	-2.08376	0.0422736	1424	crocetin glucosyltransferase, chloroplastic	GO:0016740, GO:0016757, GO:0016758, GO:0008194, GO:0080043, GO:0080044	transferase activity, transferase activity, transferring glycosyl groups, transferase activity, transferring hexosyl groups, UDP-glycosyltransferase activity, quercetin 3-O-glucosyltransferase activity, quercetin 7-O-glucosyltransferase activity
Prupe.2G021100	2.66591	0.042525	1417	---NA---	GO:0016616, GO:0055114, GO:0003854, GO:0006694	oxidoreductase activity, acting on the CH-OH group of donors, NAD or NADP as acceptor, oxidation-reduction process, 3-beta-hydroxy-delta5-steroid dehydrogenase activity, steroid biosynthetic process
Prupe.3G178000	2.30198	0.042525	2660	---NA---	GO:0003677, GO:0006355, GO:0005634	DNA binding, regulation of transcription, DNA-templated, nucleus
Prupe.1G292500	2.7206	0.0435055	5228	cytochrome P450 CYP749A22	GO:0055114, GO:0016491, GO:0016020, GO:0016021, GO:0046872, GO:0004497, GO:0005506, GO:0016705, GO:0020037	oxidation-reduction process, oxidoreductase activity, membrane, integral component of membrane, metal ion binding, monooxygenase activity, iron ion binding, oxidoreductase activity, acting on paired donors, with incorporation or reduction of molecular oxygen, heme binding
Prupe.6G040000	-2.14559	0.0444486	2368	methylesterase 17	, GO:0080030, GO:0080031, GO:0080032, GO:0009694, GO:0009696	, methyl indole-3-acetate esterase activity, methyl salicylate esterase activity, methyl jasmonate esterase activity, jasmonic acid metabolic process, salicylic acid metabolic process
Prupe.8G153100	2.36674	0.0456237	485	pathogenesis-related protein 1	GO:0006952, GO:0009607, GO:0005576, GO:0005615	defense response, response to biotic stimulus, extracellular region, extracellular space
Prupe.4G106100	2.54375	0.0462638	2785	transcription factor JUNGBRUNNEN 1	GO:0003677, GO:0006355, GO:0005634	DNA binding, regulation of transcription, DNA-templated, nucleus
Prupe.6G121800	2.9063	0.0470806	7675	pleiotropic drug resistance protein 2	GO:0005524, GO:0000166, GO:0016020, GO:0016021, GO:0042626, GO:0055085, GO:0016887	ATP binding, nucleotide binding, membrane, integral component of membrane, ATPase-coupled transmembrane transporter activity, transmembrane transport, ATPase activity
Prupe.4G028100	-3.28474	0.0474824	1497	cysteine-rich repeat secretory protein 38	#N/A	#N/A
Prupe.5G096500	3.12122	0.0474824	832	protein LURP-one-related 11	#N/A	#N/A
Prupe.6G212000	3.11162	0.0481121	2501	transcription factor bHLH18	GO:0005634, GO:0046983	nucleus, protein dimerization activity
Prupe.3G017400	-2.46942	0.0483318	1950	15.7 kDa heat shock protein, peroxisomal	GO:0009408, GO:0009651, GO:0043621, GO:0051082, GO:0006457, GO:0051259, GO:0042542, GO:0000302, GO:0005782	response to heat, response to salt stress, protein self-association, unfolded protein binding, protein folding, protein complex oligomerization, response to hydrogen peroxide, response to reactive oxygen species, peroxisomal matrix
Prupe.3G074000	2.67092	0.0483318	753	---NA---	#N/A	#N/A
Prupe.5G139400	7.11732	0.0497227	839	---NA---	GO:0016020, GO:0016021	membrane, integral component of membrane

## Sheet: TRRvsCRR
Gene.ID	log2FoldChange	padj	Gene Length	NR Description	GO IDs	GO Names
Prupe.6G138700	23.731	4.1705e-20	1997	secoisolariciresinol dehydrogenase	GO:0016491, GO:0055114	oxidoreductase activity, oxidation-reduction process
Prupe.4G059600	9.57615	0.0162334	1536	ervatamin-C	GO:0016787, GO:0008233, GO:0006508, GO:0008234, GO:0051603, GO:0005615, GO:0004197, GO:0005764	hydrolase activity, peptidase activity, proteolysis, cysteine-type peptidase activity, proteolysis involved in cellular protein catabolic process, extracellular space, cysteine-type endopeptidase activity, lysosome
Prupe.3G122000	-26.9881	0.0209066	1414	senescence-specific cysteine protease SAG39	GO:0016787, GO:0008233, GO:0006508, GO:0008234, GO:0051603, GO:0005615, GO:0004197, GO:0005764	hydrolase activity, peptidase activity, proteolysis, cysteine-type peptidase activity, proteolysis involved in cellular protein catabolic process, extracellular space, cysteine-type endopeptidase activity, lysosome
Prupe.6G263700	-4.18024	0.0209066	1985	dynein light chain LC6, flagellar outer arm	GO:0005737, GO:0003774, GO:0007017, GO:0005856, GO:0005874, GO:0030286, GO:0045505, GO:0051959, GO:2000582	cytoplasm, motor activity, microtubule-based process, cytoskeleton, microtubule, dynein complex, dynein intermediate chain binding, dynein light intermediate chain binding, positive regulation of ATP-dependent microtubule motor activity, plus-end-directed
Prupe.1G586200	4.77983	0.022847	608	16.9 kDa class I heat shock protein 1	GO:0009651, GO:0043621, GO:0051082, GO:0006457, GO:0009408, GO:0051259, GO:0042542	response to salt stress, protein self-association, unfolded protein binding, protein folding, response to heat, protein complex oligomerization, response to hydrogen peroxide
Prupe.2G243400	3.41595	0.022847	1191	17.8 kDa class I heat shock protein	GO:0009651, GO:0043621, GO:0051082, GO:0006457, GO:0009408, GO:0051259, GO:0042542	response to salt stress, protein self-association, unfolded protein binding, protein folding, response to heat, protein complex oligomerization, response to hydrogen peroxide
Prupe.5G141200	3.20827	0.022847	2129	ethylene-responsive transcription factor ERF115	GO:0005634, GO:0003677, GO:0006355, GO:0003700, GO:0006351	nucleus, DNA binding, regulation of transcription, DNA-templated, DNA-binding transcription factor activity, transcription, DNA-templated

## Sheet: CNLvsCRL
Gene.ID	log2FoldChange	padj	Gene Length	NR Description	GO IDs	GO Names
Prupe.6G051300	4.01059	3.86943e-205	3911	cinnamoyl-CoA reductase 1-like	GO:0003824, GO:0055114, GO:0050662, GO:0016616	catalytic activity, oxidation-reduction process, obsolete coenzyme binding, oxidoreductase activity, acting on the CH-OH group of donors, NAD or NADP as acceptor
Prupe.6G014700	-2.9597	7.69998e-195	5271	nucleolar complex protein 2 homolog	GO:0005634, GO:0005730, GO:0042273, GO:0005654, GO:0030690, GO:0030691	nucleus, nucleolus, ribosomal large subunit biogenesis, nucleoplasm, Noc1p-Noc2p complex, Noc2p-Noc3p complex
Prupe.3G044500	8.25097	1.66367e-146	6387	aminopeptidase M1	GO:0016787, GO:0046872, GO:0008233, GO:0006508, GO:0008270, GO:0004177, GO:0008237, GO:0031090, GO:0043231, GO:0005737, GO:0043171, GO:0070006, GO:0042277	hydrolase activity, metal ion binding, peptidase activity, proteolysis, zinc ion binding, aminopeptidase activity, metallopeptidase activity, organelle membrane, intracellular membrane-bounded organelle, cytoplasm, peptide catabolic process, metalloaminopeptidase activity, peptide binding
Prupe.1G300200	5.30064	5.44109e-102	1833	uncharacterized LOC18789479	#N/A	#N/A
Prupe.1G457300	2.62792	4.61324e-101	5571	aminopeptidase M1	GO:0016787, GO:0046872, GO:0008233, GO:0006508, GO:0008270, GO:0004177, GO:0008237, GO:0031090, GO:0043231, GO:0005737, GO:0043171, GO:0070006, GO:0042277	hydrolase activity, metal ion binding, peptidase activity, proteolysis, zinc ion binding, aminopeptidase activity, metallopeptidase activity, organelle membrane, intracellular membrane-bounded organelle, cytoplasm, peptide catabolic process, metalloaminopeptidase activity, peptide binding
Prupe.1G497900	7.45335	5.7076e-101	2547	esterase	GO:0016788	hydrolase activity, acting on ester bonds
Prupe.4G285500	8.63521	1.437e-98	4041	putative disease resistance protein RGA3	GO:0043531, GO:0006952, GO:0005515	ADP binding, defense response, protein binding
Prupe.6G026100	8.11104	2.00404e-95	3765	oligopeptide transporter 1	GO:0055085, GO:0016020, GO:0016021, GO:0015031, GO:0005887, GO:0035673, GO:0035672, GO:0015833	transmembrane transport, membrane, integral component of membrane, protein transport, integral component of plasma membrane, oligopeptide transmembrane transporter activity, oligopeptide transmembrane transport, peptide transport
Prupe.1G347900	4.60236	6.53101e-95	3248	uncharacterized protein YpgQ	GO:0000166, GO:0005524	nucleotide binding, ATP binding
Prupe.1G161100	-2.46392	2.77407e-83	5766	uncharacterized LOC18789969	#N/A	#N/A
Prupe.1G505700	5.2725	1.12617e-82	6221	---NA---	GO:0005524, GO:0000166, GO:0016301, GO:0016310, GO:0016740, GO:0004672, GO:0006468, GO:0004674	ATP binding, nucleotide binding, kinase activity, phosphorylation, transferase activity, protein kinase activity, protein phosphorylation, protein serine/threonine kinase activity
Prupe.6G051200	2.33765	2.20177e-80	3172	cinnamoyl-CoA reductase 1	, GO:0003824, GO:0055114, GO:0050662, GO:0016616	, catalytic activity, oxidation-reduction process, obsolete coenzyme binding, oxidoreductase activity, acting on the CH-OH group of donors, NAD or NADP as acceptor
Prupe.1G496100	-2.54584	1.51141e-75	4475	---NA---	#N/A	#N/A
Prupe.4G087100	-6.24966	1.19413e-73	1847	tyrosine decarboxylase 1	GO:0003824, GO:0019752, GO:0016829, GO:0030170, GO:0016831, GO:0006520, GO:0005737	catalytic activity, carboxylic acid metabolic process, lyase activity, pyridoxal phosphate binding, carboxy-lyase activity, cellular amino acid metabolic process, cytoplasm
Prupe.6G005500	4.58361	2.68983e-73	2724	V-type proton ATPase subunit F	GO:0006811, GO:0033180, GO:0046961, GO:0034220, GO:0015991, GO:1902600, GO:0016020, GO:0042625	ion transport, proton-transporting V-type ATPase, V1 domain, proton-transporting ATPase activity, rotational mechanism, ion transmembrane transport, GO_0015991, proton transmembrane transport, membrane, ATPase-coupled ion transmembrane transporter activity
Prupe.8G037200	4.97458	1.16056e-72	5584	uncharacterized LOC109946288	#N/A	#N/A
Prupe.6G076300	-3.9594	5.54405e-69	3759	triosephosphate isomerase, cytosolic	GO:0003824, GO:0016853, GO:0006096, GO:0004807, GO:0005829, GO:0006094, GO:0019563, GO:0046166	catalytic activity, isomerase activity, glycolytic process, triose-phosphate isomerase activity, cytosol, gluconeogenesis, glycerol catabolic process, glyceraldehyde-3-phosphate biosynthetic process
Prupe.1G510700	-3.56389	4.79611e-67	3190	uncharacterized LOC18793563	GO:0005515	protein binding
Prupe.I003000	8.35986	7.21902e-67	2743	cinnamoyl-CoA reductase 1	GO:0003824, GO:0050662, GO:0016616, GO:0055114, GO:0003854, GO:0006694	catalytic activity, obsolete coenzyme binding, oxidoreductase activity, acting on the CH-OH group of donors, NAD or NADP as acceptor, oxidation-reduction process, 3-beta-hydroxy-delta5-steroid dehydrogenase activity, steroid biosynthetic process
Prupe.1G552000	-2.79475	1.07316e-64	5061	uncharacterized LOC18792807	#N/A	#N/A
Prupe.8G058600	5.97138	2.50721e-62	1657	---NA---	#N/A	#N/A
Prupe.3G226600	-4.32839	2.25895e-55	3712	---NA---	GO:0005524, GO:0000166, GO:0016301, GO:0016310, GO:0016020, GO:0016021, GO:0016740, GO:0004672, GO:0006468, GO:0004674, GO:0048544, GO:0005886, GO:0106310, GO:0106311	ATP binding, nucleotide binding, kinase activity, phosphorylation, membrane, integral component of membrane, transferase activity, protein kinase activity, protein phosphorylation, protein serine/threonine kinase activity, recognition of pollen, plasma membrane, ,
Prupe.8G044400	4.44161	7.13805e-54	9576	TMV resistance protein N	GO:0007165, GO:0016787, GO:0043531, GO:0006952, GO:0005515, GO:0050135, GO:0061809	signal transduction, hydrolase activity, ADP binding, defense response, protein binding, NAD(P)+ nucleosidase activity, NAD+ nucleotidase, cyclic ADP-ribose generating
Prupe.1G412900	-3.95217	2.02888e-53	2575	calcineurin B-like protein 10	GO:0016020, GO:0016021, GO:0005509	membrane, integral component of membrane, calcium ion binding
Prupe.1G465900	3.13029	2.70396e-53	5363	---NA---	GO:0016020, GO:0016021	membrane, integral component of membrane
Prupe.6G176600	-5.32584	5.86973e-53	6561	uncharacterized LOC18775533	#N/A	#N/A
Prupe.1G207700	-4.42466	8.8076e-53	3723	---NA---	#N/A	#N/A
Prupe.2G018900	5.13548	2.69741e-51	2034	---NA---	GO:0016020, GO:0016021	membrane, integral component of membrane
Prupe.1G387500	7.25918	4.12646e-51	1971	cytochrome P450 CYP82D47	GO:0055114, GO:0016491, GO:0016020, GO:0016021, GO:0046872, GO:0004497, GO:0005506, GO:0016705, GO:0020037, GO:0098542	oxidation-reduction process, oxidoreductase activity, membrane, integral component of membrane, metal ion binding, monooxygenase activity, iron ion binding, oxidoreductase activity, acting on paired donors, with incorporation or reduction of molecular oxygen, heme binding, defense response to other organism
Prupe.1G530900	5.54651	6.58554e-51	5865	uncharacterized LOC109948705	#N/A	#N/A
Prupe.7G083100	3.61302	4.40606e-50	621	dirigent protein 21	GO:0005576, GO:0048046	extracellular region, apoplast
Prupe.1G545000	7.19898	7.283e-49	4172	putative disease resistance protein RGA3	GO:0043531, GO:0006952, GO:0005515	ADP binding, defense response, protein binding
Prupe.1G339000	7.45362	1.73959e-48	1841	D-galacturonate reductase	GO:0016491, GO:0055114, GO:0005829, GO:0004032	oxidoreductase activity, oxidation-reduction process, cytosol, alditol:NADP+ 1-oxidoreductase activity
Prupe.8G008700	6.89277	9.58132e-48	3621	disease resistance protein RPM1	GO:0043531, GO:0006952	ADP binding, defense response
Prupe.2G078200	-4.46135	2.36714e-47	2255	---NA---	GO:0016020, GO:0016021, GO:0004386, GO:0003724, GO:0003723, GO:0071013, GO:0000390	membrane, integral component of membrane, helicase activity, RNA helicase activity, RNA binding, catalytic step 2 spliceosome, spliceosomal complex disassembly
Prupe.1G331100	3.78798	2.91436e-47	1884	protein PLANT CADMIUM RESISTANCE 2	#N/A	#N/A
Prupe.2G232200	-5.54025	4.58304e-47	641	histone H4	GO:0005634, GO:0005694, GO:0046982, GO:0003677, GO:0000786, GO:0006334	nucleus, chromosome, protein heterodimerization activity, DNA binding, nucleosome, nucleosome assembly
Prupe.6G324200	3.52943	2.81195e-45	5090	probable linoleate 9S-lipoxygenase 5	GO:0005737, GO:0055114, GO:0016491, GO:0046872, GO:0016702, GO:0051213, GO:0006633, GO:0031408, GO:0006629, GO:0006631, GO:0005515, GO:0034440	cytoplasm, oxidation-reduction process, oxidoreductase activity, metal ion binding, oxidoreductase activity, acting on single donors with incorporation of molecular oxygen, incorporation of two atoms of oxygen, dioxygenase activity, fatty acid biosynthetic process, oxylipin biosynthetic process, lipid metabolic process, fatty acid metabolic process, protein binding, lipid oxidation
Prupe.3G086400	6.45941	3.22447e-44	635	---NA---	GO:0016020, GO:0016021	membrane, integral component of membrane
Prupe.4G093300	6.25771	1.77216e-43	3282	uncharacterized LOC18781481	GO:0005524, GO:0000166, GO:0016301, GO:0016310, GO:0016020, GO:0016021, GO:0016740, GO:0005509, GO:0004672, GO:0006468, GO:0004674, GO:0030247, GO:0005886, GO:0007166	ATP binding, nucleotide binding, kinase activity, phosphorylation, membrane, integral component of membrane, transferase activity, calcium ion binding, protein kinase activity, protein phosphorylation, protein serine/threonine kinase activity, polysaccharide binding, plasma membrane, cell surface receptor signaling pathway
Prupe.2G078500	2.40563	4.11662e-43	2794	---NA---	GO:0016020, GO:0016021	membrane, integral component of membrane
Prupe.1G434100	7.01117	5.10125e-43	5084	uncharacterized LOC18790825	GO:0006629, GO:0016787	lipid metabolic process, hydrolase activity
Prupe.6G027400	-3.33061	6.8204e-42	10335	mediator of RNA polymerase II transcription subunit 15a	, GO:0005634, GO:0006355, GO:0003712, GO:0031490	, nucleus, regulation of transcription, DNA-templated, transcription coregulator activity, chromatin DNA binding
Prupe.6G017200	5.19488	5.78905e-41	2423	G-type lectin S-receptor-like serine/threonine-protein kinase RLK1	GO:0005524, GO:0000166, GO:0016301, GO:0016310, GO:0016020, GO:0016021, GO:0016740, GO:0004672, GO:0006468, GO:0004674, GO:0048544, GO:0106310, GO:0106311	ATP binding, nucleotide binding, kinase activity, phosphorylation, membrane, integral component of membrane, transferase activity, protein kinase activity, protein phosphorylation, protein serine/threonine kinase activity, recognition of pollen, ,
Prupe.I004500	2.84098	1.78401e-39	2960	scarecrow-like protein 30	GO:0006351, GO:0006355, GO:0005634, GO:0003700, GO:0043565	transcription, DNA-templated, regulation of transcription, DNA-templated, nucleus, DNA-binding transcription factor activity, sequence-specific DNA binding
Prupe.3G094600	-4.04533	1.13712e-38	8835	acetylornithine aminotransferase, mitochondrial	GO:0003824, GO:0008483, GO:0030170, GO:0006526, GO:0006525, GO:0005507, GO:0042742, GO:0044419, GO:0003992, GO:0080022, GO:0009570, GO:0042802	catalytic activity, transaminase activity, pyridoxal phosphate binding, arginine biosynthetic process, arginine metabolic process, copper ion binding, defense response to bacterium, interspecies interaction between organisms, N2-acetyl-L-ornithine:2-oxoglutarate 5-aminotransferase activity, primary root development, chloroplast stroma, identical protein binding
Prupe.6G281100	4.7392	2.45894e-38	2252	receptor like protein 30	GO:0016020, GO:0016021, GO:0005515	membrane, integral component of membrane, protein binding
Prupe.8G005100	-4.69629	3.61134e-38	4869	TMV resistance protein N-like	GO:0007165, GO:0016787, GO:0043531, GO:0006952, GO:0005515, GO:0050135, GO:0061809	signal transduction, hydrolase activity, ADP binding, defense response, protein binding, NAD(P)+ nucleosidase activity, NAD+ nucleotidase, cyclic ADP-ribose generating
Prupe.1G032800	28.1301	5.6678e-38	1854	berberine bridge enzyme-like 17	GO:0016491, GO:0055114, GO:0050660, GO:0071949	oxidoreductase activity, oxidation-reduction process, flavin adenine dinucleotide binding, FAD binding
Prupe.3G156600	-5.38461	1.33814e-37	6314	---NA---	GO:0003824, GO:0016787	catalytic activity, hydrolase activity
Prupe.4G248600	3.09645	1.48058e-37	2715	codeine O-demethylase	GO:0055114, GO:0016491, GO:0046872	oxidation-reduction process, oxidoreductase activity, metal ion binding
Prupe.6G249400	3.85435	1.6208e-37	6362	type I inositol polyphosphate 5-phosphatase 8	GO:0016787, GO:0046856, GO:0004439, GO:0034485, GO:0016020, GO:0016021	hydrolase activity, phosphatidylinositol dephosphorylation, phosphatidylinositol-4,5-bisphosphate 5-phosphatase activity, phosphatidylinositol-3,4,5-trisphosphate 5-phosphatase activity, membrane, integral component of membrane
Prupe.1G159600	-3.26595	2.90197e-37	7375	putative disease resistance protein RGA1	GO:0043531, GO:0006952	ADP binding, defense response
Prupe.8G219700	-3.98193	2.90197e-37	3418	long-chain-alcohol oxidase FAO2	GO:0055114, GO:0016491, GO:0016020, GO:0016021, GO:0050660, GO:0016829, GO:0016614, GO:0046577, GO:0046593	oxidation-reduction process, oxidoreductase activity, membrane, integral component of membrane, flavin adenine dinucleotide binding, lyase activity, oxidoreductase activity, acting on CH-OH group of donors, long-chain-alcohol oxidase activity, mandelonitrile lyase activity
Prupe.6G164600	-5.30477	7.11446e-37	5896	serine/threonine-protein kinase ATG1t	GO:0005524, GO:0000166, GO:0016301, GO:0016310, GO:0016740, GO:0004672, GO:0006468, GO:0004674	ATP binding, nucleotide binding, kinase activity, phosphorylation, transferase activity, protein kinase activity, protein phosphorylation, protein serine/threonine kinase activity
Prupe.6G223400	4.92483	1.31847e-36	2227	peroxidase 73	GO:0055114, GO:0016491, GO:0046872, GO:0005576, GO:0020037, GO:0004601, GO:0098869, GO:0006979, GO:0042744	oxidation-reduction process, oxidoreductase activity, metal ion binding, extracellular region, heme binding, peroxidase activity, cellular oxidant detoxification, response to oxidative stress, hydrogen peroxide catabolic process
Prupe.8G022600	-2.13464	3.17728e-36	4691	uncharacterized LOC18767991	GO:0046872,	metal ion binding,
Prupe.1G429700	2.83967	5.57573e-36	3171	putative receptor protein kinase ZmPK1	GO:0005524, GO:0000166, GO:0016301, GO:0016310, GO:0016020, GO:0016021, GO:0016740, GO:0004672, GO:0006468, GO:0004674, GO:0048544, GO:0106310, GO:0106311	ATP binding, nucleotide binding, kinase activity, phosphorylation, membrane, integral component of membrane, transferase activity, protein kinase activity, protein phosphorylation, protein serine/threonine kinase activity, recognition of pollen, ,
Prupe.7G064000	3.59998	7.46003e-36	6068	probable galactinol--sucrose galactosyltransferase 2	GO:0003824, GO:0005975, GO:0006979, GO:0034484, GO:0052692, GO:0080167, GO:0009506	catalytic activity, carbohydrate metabolic process, response to oxidative stress, raffinose catabolic process, raffinose alpha-galactosidase activity, response to karrikin, plasmodesma
Prupe.3G013900	2.35648	6.73272e-35	2765	---NA---	#N/A	#N/A
Prupe.6G049100	2.94805	2.33093e-34	2947	probable protein phosphatase 2C 26	GO:0016787, GO:0046872, GO:0016791, GO:0016311, GO:0004721, GO:0006470, GO:0004722, GO:0003824, GO:0106306, GO:0106307	hydrolase activity, metal ion binding, phosphatase activity, dephosphorylation, phosphoprotein phosphatase activity, protein dephosphorylation, protein serine/threonine phosphatase activity, catalytic activity, ,
Prupe.3G155600	-5.38516	2.39017e-34	2453	expansin-B3	GO:0005576, GO:0019953, GO:0009506, GO:0006949	extracellular region, sexual reproduction, plasmodesma, syncytium formation
Prupe.1G229700	8.42939	4.06629e-33	1941	---NA---	GO:0055114, GO:0016491, GO:0046872, GO:0004497, GO:0005506, GO:0016705, GO:0020037	oxidation-reduction process, oxidoreductase activity, metal ion binding, monooxygenase activity, iron ion binding, oxidoreductase activity, acting on paired donors, with incorporation or reduction of molecular oxygen, heme binding
Prupe.3G016000	-2.77738	4.3396e-33	5261	---NA---	GO:0003824, GO:0019752, GO:0016829, GO:0030170, GO:0016831, GO:0004351, GO:0006536, GO:0005829, GO:0006538	catalytic activity, carboxylic acid metabolic process, lyase activity, pyridoxal phosphate binding, carboxy-lyase activity, glutamate decarboxylase activity, glutamate metabolic process, cytosol, glutamate catabolic process
Prupe.8G031700	-3.80428	1.12928e-32	1649	DNA replication licensing factor MCM2-like	GO:0005524, GO:0003677, GO:0004386, GO:0005634, GO:0006270, GO:0042555, GO:1905775, GO:0003688, GO:0003697, GO:0000724, GO:0032508	ATP binding, DNA binding, helicase activity, nucleus, DNA replication initiation, MCM complex, negative regulation of DNA helicase activity, DNA replication origin binding, single-stranded DNA binding, double-strand break repair via homologous recombination, DNA duplex unwinding
Prupe.4G155000	-7.55225	2.55021e-32	3034	protein SRG1	GO:0055114, GO:0016491, GO:0046872	oxidation-reduction process, oxidoreductase activity, metal ion binding
Prupe.6G149100	5.88459	4.14321e-32	1792	probable carboxylesterase 15	GO:0016787	hydrolase activity
Prupe.6G115100	-5.28877	8.44775e-32	5271	lysosomal Pro-X carboxypeptidase	GO:0016787, GO:0006508, GO:0008236, GO:0008239	hydrolase activity, proteolysis, serine-type peptidase activity, dipeptidyl-peptidase activity
Prupe.3G062300	5.65573	1.60151e-31	3991	ankyrin repeat-containing protein At2g01680	GO:0016020, GO:0016021, GO:0005515	membrane, integral component of membrane, protein binding
Prupe.6G290900	-5.71712	2.87541e-31	1684	transcription repressor OFP1	GO:0005634, GO:0003677, GO:0045892	nucleus, DNA binding, negative regulation of transcription, DNA-templated
Prupe.6G105900	5.80414	2.08838e-30	929	ripening-related protein grip22	#N/A	#N/A
Prupe.8G053300	3.09462	8.22036e-30	9411	TMV resistance protein N	GO:0007165, GO:0016787, GO:0043531, GO:0006952, GO:0005515, GO:0050135, GO:0061809	signal transduction, hydrolase activity, ADP binding, defense response, protein binding, NAD(P)+ nucleosidase activity, NAD+ nucleotidase, cyclic ADP-ribose generating
Prupe.5G044800	-5.59133	1.45046e-29	740	---NA---	#N/A	#N/A
Prupe.8G192600	-7.24671	2.5777e-29	731	---NA---	#N/A	#N/A
Prupe.4G093000	5.60507	5.73816e-29	2552	wall-associated receptor kinase 5	GO:0005524, GO:0000166, GO:0016301, GO:0016310, GO:0016740, GO:0004672, GO:0006468, GO:0004674, GO:0030247, GO:0005886, GO:0007166	ATP binding, nucleotide binding, kinase activity, phosphorylation, transferase activity, protein kinase activity, protein phosphorylation, protein serine/threonine kinase activity, polysaccharide binding, plasma membrane, cell surface receptor signaling pathway
Prupe.6G025000	-2.97935	2.86687e-28	3839	cellulose synthase-like protein E1	GO:0016020, GO:0016021, GO:0016740, GO:0016757, GO:0016760, GO:0030244, GO:0097502, GO:0071555, GO:0005886, GO:0005802, GO:0009833, GO:0051753	membrane, integral component of membrane, transferase activity, transferase activity, transferring glycosyl groups, cellulose synthase (UDP-forming) activity, cellulose biosynthetic process, mannosylation, cell wall organization, plasma membrane, trans-Golgi network, plant-type primary cell wall biogenesis, mannan synthase activity
Prupe.1G274000	3.01835	3.17111e-28	2578	---NA---	GO:0016020, GO:0016021	membrane, integral component of membrane
Prupe.1G483200	4.42266	4.34277e-28	6720	probable sucrose-phosphate synthase 1	GO:0016740, GO:0016757, GO:0016157, GO:0046524, GO:0005985, GO:0005986	transferase activity, transferase activity, transferring glycosyl groups, sucrose synthase activity, sucrose-phosphate synthase activity, sucrose metabolic process, sucrose biosynthetic process
Prupe.6G025100	3.81139	1.44503e-27	3537	cellulose synthase-like protein E6	GO:0016020, GO:0016021, GO:0016740, GO:0016757, GO:0016760, GO:0030244, GO:0071555, GO:0097502, GO:0005886, GO:0005802, GO:0009833, GO:0051753	membrane, integral component of membrane, transferase activity, transferase activity, transferring glycosyl groups, cellulose synthase (UDP-forming) activity, cellulose biosynthetic process, cell wall organization, mannosylation, plasma membrane, trans-Golgi network, plant-type primary cell wall biogenesis, mannan synthase activity
Prupe.1G039200	4.67685	2.03118e-27	2434	transcription factor MYB14	GO:0005634, GO:0003677	nucleus, DNA binding
Prupe.3G101600	-10.1789	2.74364e-27	6166	---NA---	GO:0016747	transferase activity, transferring acyl groups other than amino-acyl groups
Prupe.2G055800	-2.76378	3.39299e-27	3396	AP-4 complex subunit epsilon	GO:0006898, GO:0140312, GO:0030124	receptor-mediated endocytosis, cargo adaptor activity, AP-4 adaptor complex
Prupe.3G039300	3.66653	5.41041e-27	2083	cytochrome P450 71A1	GO:0055114, GO:0016491, GO:0016020, GO:0016021, GO:0046872, GO:0004497, GO:0005506, GO:0016705, GO:0020037	oxidation-reduction process, oxidoreductase activity, membrane, integral component of membrane, metal ion binding, monooxygenase activity, iron ion binding, oxidoreductase activity, acting on paired donors, with incorporation or reduction of molecular oxygen, heme binding
Prupe.2G139800	4.25682	5.7125e-27	709	---NA---	#N/A	#N/A
Prupe.1G042800	3.83324	6.14485e-27	1463	cell number regulator 10	GO:0016020, GO:0016021	membrane, integral component of membrane
Prupe.1G397900	4.43919	8.29878e-27	1954	aspartyl protease family protein At5g10770	GO:0004190, GO:0006508	aspartic-type endopeptidase activity, proteolysis
Prupe.4G147100	6.56782	1.1107e-26	2136	probable glutathione S-transferase	GO:0006749, GO:0005737, GO:0004364, GO:0005515	glutathione metabolic process, cytoplasm, glutathione transferase activity, protein binding
Prupe.6G190100	10.9569	3.16328e-26	2527	7-deoxyloganetin glucosyltransferase	GO:0016740, GO:0016757, GO:0016758, GO:0008194, GO:0080043, GO:0080044	transferase activity, transferase activity, transferring glycosyl groups, transferase activity, transferring hexosyl groups, UDP-glycosyltransferase activity, quercetin 3-O-glucosyltransferase activity, quercetin 7-O-glucosyltransferase activity
Prupe.8G000100	2.95811	3.69981e-26	1754	benzyl alcohol O-benzoyltransferase	GO:0016747	transferase activity, transferring acyl groups other than amino-acyl groups
Prupe.8G015700	13.0826	4.35182e-26	4633	pescadillo homolog	GO:0005634, GO:0005730, GO:0042254, GO:0006364, GO:0005654, GO:0042273, GO:0043021, GO:0000463, GO:0000466, GO:0030687, GO:0003723, GO:0070545	nucleus, nucleolus, ribosome biogenesis, rRNA processing, nucleoplasm, ribosomal large subunit biogenesis, ribonucleoprotein complex binding, maturation of LSU-rRNA from tricistronic rRNA transcript (SSU-rRNA, 5.8S rRNA, LSU-rRNA), maturation of 5.8S rRNA from tricistronic rRNA transcript (SSU-rRNA, 5.8S rRNA, LSU-rRNA), preribosome, large subunit precursor, RNA binding, PeBoW complex
Prupe.6G228200	4.49479	4.57997e-26	2778	uncharacterized LOC18775052	GO:0005524, GO:0000166, GO:0016301, GO:0016310, GO:0016740, GO:0004672, GO:0006468, GO:0004674, GO:0016020, GO:0016021, GO:0005886, GO:0046777, GO:0009506	ATP binding, nucleotide binding, kinase activity, phosphorylation, transferase activity, protein kinase activity, protein phosphorylation, protein serine/threonine kinase activity, membrane, integral component of membrane, plasma membrane, protein autophosphorylation, plasmodesma
Prupe.8G015200	13.1669	4.57997e-26	5395	pescadillo homolog	GO:0005634, GO:0005730, GO:0042254, GO:0006364, GO:0005654, GO:0042273, GO:0043021, GO:0000463, GO:0000466, GO:0030687, GO:0003723, GO:0070545	nucleus, nucleolus, ribosome biogenesis, rRNA processing, nucleoplasm, ribosomal large subunit biogenesis, ribonucleoprotein complex binding, maturation of LSU-rRNA from tricistronic rRNA transcript (SSU-rRNA, 5.8S rRNA, LSU-rRNA), maturation of 5.8S rRNA from tricistronic rRNA transcript (SSU-rRNA, 5.8S rRNA, LSU-rRNA), preribosome, large subunit precursor, RNA binding, PeBoW complex
Prupe.1G553300	3.77612	5.3134e-26	3179	---NA---	#N/A	#N/A
Prupe.5G078700	-6.29921	7.27419e-26	2408	---NA---	GO:0055114, GO:0016491, GO:0046872, GO:0048038, GO:0005507, GO:0008131, GO:0009308, GO:0052593, GO:0052594, GO:0052595, GO:0052596	oxidation-reduction process, oxidoreductase activity, metal ion binding, quinone binding, copper ion binding, primary amine oxidase activity, amine metabolic process, tryptamine:oxygen oxidoreductase (deaminating) activity, aminoacetone:oxygen oxidoreductase(deaminating) activity, aliphatic-amine oxidase activity, phenethylamine:oxygen oxidoreductase (deaminating) activity
Prupe.2G077400	5.48943	1.12816e-25	5091	LRR receptor-like serine/threonine-protein kinase GSO1	GO:0016020, GO:0016021, GO:0005515	membrane, integral component of membrane, protein binding
Prupe.1G439500	26.9649	1.14118e-25	2402	patatin-like protein 2	GO:0016787, GO:0016042, GO:0006629, GO:0004620, GO:0047372	hydrolase activity, lipid catabolic process, lipid metabolic process, phospholipase activity, acylglycerol lipase activity
Prupe.7G138600	2.63897	1.36688e-25	3883	---NA---	GO:0043531	ADP binding
Prupe.2G126900	4.85636	1.44458e-25	4561	protein SUPPRESSOR OF npr1-1, CONSTITUTIVE 1	GO:0007165, GO:0016787, GO:0016020, GO:0016021, GO:0043531, GO:0006952, GO:0005515, GO:0050135, GO:0061809	signal transduction, hydrolase activity, membrane, integral component of membrane, ADP binding, defense response, protein binding, NAD(P)+ nucleosidase activity, NAD+ nucleotidase, cyclic ADP-ribose generating
Prupe.2G078000	-2.45343	3.68427e-25	6436	---NA---	#N/A	#N/A
Prupe.2G161100	-13.229	5.73007e-25	2233	uncharacterized LOC18785816	GO:0055114, GO:0016020	oxidation-reduction process, membrane
Prupe.2G025200	-3.69981	1.40242e-24	10126	probable disease resistance protein At4g27220	GO:0043531	ADP binding
Prupe.3G029000	9.28183	1.77965e-24	2555	uncharacterized LOC109948255	GO:0016020, GO:0016021	membrane, integral component of membrane
Prupe.1G181700	-4.27034	2.02351e-24	3519	---NA---	#N/A	#N/A
Prupe.2G022600	-5.08628	2.18435e-24	4749	---NA---	#N/A	#N/A
Prupe.6G216100	-5.42724	2.35289e-24	3949	squalene epoxidase 3	GO:0055114, GO:0016491, GO:0016020, GO:0016021, GO:0050660, GO:0004506, GO:0016126, GO:0005783	oxidation-reduction process, oxidoreductase activity, membrane, integral component of membrane, flavin adenine dinucleotide binding, squalene monooxygenase activity, sterol biosynthetic process, endoplasmic reticulum
Prupe.3G056000	7.81666	3.16889e-24	4637	putative leucine-rich repeat receptor-like protein kinase At2g19210	GO:0005524, GO:0000166, GO:0016301, GO:0016310, GO:0016020, GO:0016021, GO:0016740, GO:0004672, GO:0006468, GO:0004674, GO:0005515	ATP binding, nucleotide binding, kinase activity, phosphorylation, membrane, integral component of membrane, transferase activity, protein kinase activity, protein phosphorylation, protein serine/threonine kinase activity, protein binding
Prupe.1G476700	-7.76979	3.30632e-24	938	---NA---	#N/A	#N/A
Prupe.4G116000	4.48667	4.2474e-24	1136	VQ motif-containing protein 22	#N/A	#N/A
Prupe.2G078800	8.92262	8.70955e-24	1322	probable LRR receptor-like serine/threonine-protein kinase At1g12460	GO:0016020, GO:0016021	membrane, integral component of membrane
Prupe.1G054900	3.42217	9.21658e-24	2248	---NA---	GO:0006749, GO:0005737, GO:0004364, GO:0005515	glutathione metabolic process, cytoplasm, glutathione transferase activity, protein binding
Prupe.4G164000	3.79695	9.83243e-24	1969	chitinase 2	GO:0005975, GO:0016787, GO:0016798, GO:0008152, GO:0004553	carbohydrate metabolic process, hydrolase activity, hydrolase activity, acting on glycosyl bonds, metabolic process, hydrolase activity, hydrolyzing O-glycosyl compounds
Prupe.1G497400	7.45165	1.40474e-23	6639	esterase	GO:0016788, GO:0016020, GO:0016021	hydrolase activity, acting on ester bonds, membrane, integral component of membrane
Prupe.3G037200	13.0761	1.80725e-23	3049	peroxisomal (S)-2-hydroxy-acid oxidase GLO4	GO:0055114, GO:0003824, GO:0016491, GO:0009853, GO:0010181, GO:0003973, GO:0052852, GO:0052853, GO:0052854, GO:0009854	oxidation-reduction process, catalytic activity, oxidoreductase activity, photorespiration, FMN binding, (S)-2-hydroxy-acid oxidase activity, very-long-chain-(S)-2-hydroxy-acid oxidase activity, long-chain-(S)-2-hydroxy-long-chain-acid oxidase activity, medium-chain-(S)-2-hydroxy-acid oxidase activity, oxidative photosynthetic carbon pathway
Prupe.6G017400	-3.83116	2.01639e-23	2450	---NA---	GO:0005524, GO:0000166, GO:0016301, GO:0016310, GO:0016020, GO:0016021, GO:0016740, GO:0004672, GO:0006468, GO:0004674, GO:0048544, GO:0106310, GO:0106311	ATP binding, nucleotide binding, kinase activity, phosphorylation, membrane, integral component of membrane, transferase activity, protein kinase activity, protein phosphorylation, protein serine/threonine kinase activity, recognition of pollen, ,
Prupe.2G158900	2.51109	2.0873e-23	5232	uncharacterized LOC109947209	GO:0005634, GO:0003677	nucleus, DNA binding
Prupe.7G139500	4.92139	2.46767e-23	3280	probable disease resistance protein At5g66890	GO:0043531	ADP binding
Prupe.6G074700	5.64629	2.49759e-23	3146	putative receptor-like protein kinase At3g47110	GO:0005524, GO:0000166, GO:0016301, GO:0016310, GO:0016020, GO:0016021, GO:0016740, GO:0004672, GO:0006468, GO:0004674, GO:0005515	ATP binding, nucleotide binding, kinase activity, phosphorylation, membrane, integral component of membrane, transferase activity, protein kinase activity, protein phosphorylation, protein serine/threonine kinase activity, protein binding
Prupe.4G250400	2.28678	3.09628e-23	1651	---NA---	#N/A	#N/A
Prupe.8G005900	-2.605	3.09628e-23	6446	endoglucanase 9	GO:0005975, GO:0016787, GO:0016798, GO:0008152, GO:0004553, GO:0008810, GO:0000272, GO:0030245	carbohydrate metabolic process, hydrolase activity, hydrolase activity, acting on glycosyl bonds, metabolic process, hydrolase activity, hydrolyzing O-glycosyl compounds, cellulase activity, polysaccharide catabolic process, cellulose catabolic process
Prupe.1G273800	2.82737	3.24439e-23	3798	putative F-box protein At3g58860	GO:0005515	protein binding
Prupe.6G008400	2.36088	3.99091e-23	2121	UDP-glucose iridoid glucosyltransferase	GO:0016740, GO:0016758, GO:0008194, GO:0080043, GO:0080044	transferase activity, transferase activity, transferring hexosyl groups, UDP-glycosyltransferase activity, quercetin 3-O-glucosyltransferase activity, quercetin 7-O-glucosyltransferase activity
Prupe.5G035800	-7.07335	4.25293e-23	3723	---NA---	GO:0016020, GO:0016021	membrane, integral component of membrane
Prupe.1G502100	2.77621	4.78528e-23	7177	G-type lectin S-receptor-like serine/threonine-protein kinase At5g35370	GO:0005524, GO:0000166, GO:0016301, GO:0016310, GO:0016020, GO:0016021, GO:0016740, GO:0004672, GO:0006468, GO:0004674, GO:0048544, GO:0106310, GO:0106311	ATP binding, nucleotide binding, kinase activity, phosphorylation, membrane, integral component of membrane, transferase activity, protein kinase activity, protein phosphorylation, protein serine/threonine kinase activity, recognition of pollen, ,
Prupe.2G116000	3.17321	4.96586e-23	3503	probable LRR receptor-like serine/threonine-protein kinase At3g47570	GO:0005524, GO:0000166, GO:0016301, GO:0016310, GO:0016020, GO:0016021, GO:0016740, GO:0004672, GO:0006468, GO:0004674, GO:0005515	ATP binding, nucleotide binding, kinase activity, phosphorylation, membrane, integral component of membrane, transferase activity, protein kinase activity, protein phosphorylation, protein serine/threonine kinase activity, protein binding
Prupe.6G233200	-3.36201	6.88881e-23	1902	UDP-glycosyltransferase 86A1	GO:0016740, GO:0016757, GO:0016758, GO:0008194	transferase activity, transferase activity, transferring glycosyl groups, transferase activity, transferring hexosyl groups, UDP-glycosyltransferase activity
Prupe.2G162300	3.66342	8.20098e-23	2368	---NA---	GO:0016491, GO:0055114, GO:0016020	oxidoreductase activity, oxidation-reduction process, membrane
Prupe.8G038900	2.7369	9.15083e-23	3424	peroxidase 12	GO:0055114, GO:0016491, GO:0046872, GO:0005576, GO:0020037, GO:0004601, GO:0098869, GO:0006979, GO:0042744, GO:0009506, GO:0009505	oxidation-reduction process, oxidoreductase activity, metal ion binding, extracellular region, heme binding, peroxidase activity, cellular oxidant detoxification, response to oxidative stress, hydrogen peroxide catabolic process, plasmodesma, plant-type cell wall
Prupe.4G147200	3.43767	1.12288e-22	1665	---NA---	GO:0006749, GO:0005737, GO:0004364, GO:0005515	glutathione metabolic process, cytoplasm, glutathione transferase activity, protein binding
Prupe.3G127500	-2.12684	1.90924e-22	3223	---NA---	#N/A	#N/A
Prupe.8G014200	2.68617	2.33106e-22	1343	---NA---	GO:0016020, GO:0016021	membrane, integral component of membrane
Prupe.1G346500	-3.39863	2.63509e-22	2478	4-hydroxybenzoate geranyltransferase 2	GO:0016020, GO:0016021, GO:0016765, GO:0016740, GO:0005739, GO:0005743, GO:0004659, GO:0031305, GO:0006744, GO:0008299, GO:0002083, GO:0002094, GO:0047293	membrane, integral component of membrane, transferase activity, transferring alkyl or aryl (other than methyl) groups, transferase activity, mitochondrion, mitochondrial inner membrane, prenyltransferase activity, integral component of mitochondrial inner membrane, ubiquinone biosynthetic process, isoprenoid biosynthetic process, 4-hydroxybenzoate decaprenyltransferase activity, polyprenyltransfe…
Prupe.6G202800	4.11766	2.93173e-22	4027	putative U-box domain-containing protein 50	GO:0005524, GO:0004672, GO:0006468, GO:0004842, GO:0016567	ATP binding, protein kinase activity, protein phosphorylation, ubiquitin-protein transferase activity, protein ubiquitination
Prupe.6G234500	2.05109	3.18041e-22	9093	putative white-brown complex homolog protein 30	GO:0005524, GO:0000166, GO:0016020, GO:0016021, GO:0016887, GO:0042626, GO:0055085, GO:0009506	ATP binding, nucleotide binding, membrane, integral component of membrane, ATPase activity, ATPase-coupled transmembrane transporter activity, transmembrane transport, plasmodesma
Prupe.1G524300	4.12648	1.03583e-21	2541	uncharacterized LOC18793913	#N/A	#N/A
Prupe.5G237200	-5.19033	1.21236e-21	920	---NA---	#N/A	#N/A
Prupe.2G180400	-6.44393	1.28309e-21	1576	uncharacterized LOC109947525	#N/A	#N/A
Prupe.4G119200	2.93314	2.39817e-21	5140	vacuolar-sorting receptor 7	, GO:0005794, GO:0016020, GO:0016021, GO:0005509, GO:0016567, GO:0061630, GO:0006511, GO:0005768, GO:0005802, GO:0006623, GO:0006896, GO:0017119	, Golgi apparatus, membrane, integral component of membrane, calcium ion binding, protein ubiquitination, ubiquitin protein ligase activity, ubiquitin-dependent protein catabolic process, endosome, trans-Golgi network, protein targeting to vacuole, Golgi to vacuole transport, Golgi transport complex
Prupe.7G178600	5.60026	3.16286e-21	5254	probable acyl-activating enzyme 1, peroxisomal	GO:0003824	catalytic activity
Prupe.3G050500	-5.308	4.64532e-21	1128	---NA---	GO:0016020, GO:0016021	membrane, integral component of membrane
Prupe.6G165500	5.71161	5.039e-21	2866	G-type lectin S-receptor-like serine/threonine-protein kinase LECRK2	GO:0005524, GO:0000166, GO:0016301, GO:0016310, GO:0016020, GO:0016021, GO:0016740, GO:0004672, GO:0006468, GO:0004674, GO:0048544, GO:0106310, GO:0106311	ATP binding, nucleotide binding, kinase activity, phosphorylation, membrane, integral component of membrane, transferase activity, protein kinase activity, protein phosphorylation, protein serine/threonine kinase activity, recognition of pollen, ,
Prupe.8G015800	11.7762	5.12991e-21	3727	uncharacterized LOC109950734	GO:0016567, GO:0016020, GO:0061630, GO:0006511, GO:0005768, GO:0005802, GO:0006623, GO:0006896, GO:0017119,	protein ubiquitination, membrane, ubiquitin protein ligase activity, ubiquitin-dependent protein catabolic process, endosome, trans-Golgi network, protein targeting to vacuole, Golgi to vacuole transport, Golgi transport complex,
Prupe.1G498600	6.97787	5.15389e-21	472	---NA---	#N/A	#N/A
Prupe.3G008100	2.41566	5.3393e-21	3569	uncharacterized LOC18788052	GO:0016020, GO:0016021	membrane, integral component of membrane
Prupe.3G025100	-11.912	5.45775e-21	1868	protein HAPLESS 2	GO:0016020, GO:0016021	membrane, integral component of membrane
Prupe.3G256300	-7.1267	5.7399e-21	2408	UDP-glycosyltransferase 83A1	GO:0016740, GO:0016758, GO:0008194, GO:0043231	transferase activity, transferase activity, transferring hexosyl groups, UDP-glycosyltransferase activity, intracellular membrane-bounded organelle
Prupe.1G168200	-2.40983	6.44556e-21	15291	probable acyl-activating enzyme 16, chloroplastic	GO:0003824	catalytic activity
Prupe.4G279600	3.28735	7.92734e-21	2249	NAC domain-containing protein 2	GO:0003677, GO:0006355, GO:0005634	DNA binding, regulation of transcription, DNA-templated, nucleus
Prupe.6G243400	4.54206	9.33348e-21	4058	---NA---	GO:0043531, GO:0006952	ADP binding, defense response
Prupe.1G325400	5.40624	1.07093e-20	2457	---NA---	#N/A	#N/A
Prupe.4G241200	9.57621	1.56652e-20	2036	L-type lectin-domain containing receptor kinase IX.1	GO:0005886, GO:0005524, GO:0000166, GO:0016301, GO:0016310, GO:0016020, GO:0016021, GO:0016740, GO:0030246, GO:0004672, GO:0006468, GO:0007178, GO:0004675, GO:0002229, GO:0042742	plasma membrane, ATP binding, nucleotide binding, kinase activity, phosphorylation, membrane, integral component of membrane, transferase activity, carbohydrate binding, protein kinase activity, protein phosphorylation, transmembrane receptor protein serine/threonine kinase signaling pathway, transmembrane receptor protein serine/threonine kinase activity, defense response to oomycetes, defense r…
Prupe.8G170400	2.47944	1.71878e-20	8160	mechanosensitive ion channel protein 6	GO:0005886, GO:0055085, GO:0016020, GO:0016021, GO:0006811, GO:0034220, GO:0008381, GO:0006820	plasma membrane, transmembrane transport, membrane, integral component of membrane, ion transport, ion transmembrane transport, mechanosensitive ion channel activity, anion transport
Prupe.6G025200	4.85525	1.87131e-20	2863	DNA polymerase zeta catalytic subunit	GO:0071897, GO:0003887, GO:0006281, GO:0019985, GO:0016035	DNA biosynthetic process, DNA-directed DNA polymerase activity, DNA repair, translesion synthesis, zeta DNA polymerase complex
Prupe.3G051100	-3.40933	2.16196e-20	5411	calcineurin B-like protein 10	GO:0005509	calcium ion binding
Prupe.3G197000	3.36088	2.1977e-20	3891	nudix hydrolase 2	GO:0016787, GO:0035529, GO:0047631, GO:0051287	hydrolase activity, NADH pyrophosphatase activity, ADP-ribose diphosphatase activity, NAD binding
Prupe.3G049700	2.17573	2.88749e-20	7824	protein ROOT HAIR DEFECTIVE 3 homolog 1	GO:0005789, GO:0000166, GO:0016787, GO:0016020, GO:0016021, GO:0005525, GO:0003924, GO:0005783, GO:0016320,	endoplasmic reticulum membrane, nucleotide binding, hydrolase activity, membrane, integral component of membrane, GTP binding, GTPase activity, endoplasmic reticulum, endoplasmic reticulum membrane fusion,
Prupe.1G080600	3.88246	3.53786e-20	1515	endochitinase EP3	GO:0005975, GO:0006952, GO:0004568, GO:0008061, GO:0006032, GO:0016998	carbohydrate metabolic process, defense response, chitinase activity, chitin binding, chitin catabolic process, cell wall macromolecule catabolic process
Prupe.1G393100	6.25283	4.04761e-20	1866	probable WRKY transcription factor 40	GO:0005634, GO:0003677, GO:0006355, GO:0003700, GO:0043565	nucleus, DNA binding, regulation of transcription, DNA-templated, DNA-binding transcription factor activity, sequence-specific DNA binding
Prupe.1G519500	-7.44654	4.04761e-20	2201	7-deoxyloganetin glucosyltransferase	GO:0016740, GO:0016757, GO:0016758, GO:0008194, GO:0080043, GO:0080044	transferase activity, transferase activity, transferring glycosyl groups, transferase activity, transferring hexosyl groups, UDP-glycosyltransferase activity, quercetin 3-O-glucosyltransferase activity, quercetin 7-O-glucosyltransferase activity
Prupe.8G092600	2.51418	4.41121e-20	2415	AAA-ATPase At3g50940	GO:0005524, GO:0000166, GO:0016887	ATP binding, nucleotide binding, ATPase activity
Prupe.1G368500	2.73061	4.61222e-20	4029	---NA---	GO:0008380, GO:0005634, GO:0000166, GO:0005524, GO:0016787, GO:0016020, GO:0016021, GO:0003676, GO:0004386, GO:0003724, GO:0003723, GO:0071013, GO:0000390	RNA splicing, nucleus, nucleotide binding, ATP binding, hydrolase activity, membrane, integral component of membrane, nucleic acid binding, helicase activity, RNA helicase activity, RNA binding, catalytic step 2 spliceosome, spliceosomal complex disassembly
Prupe.3G136800	2.38415	4.66602e-20	5626	---NA---	GO:0005515,	protein binding,
Prupe.1G162800	3.92689	5.36849e-20	3599	cyclic nucleotide-gated ion channel 1-like	GO:0055085, GO:0016020, GO:0016021, GO:0005216, GO:0006811, GO:0034220	transmembrane transport, membrane, integral component of membrane, ion channel activity, ion transport, ion transmembrane transport
Prupe.1G364600	3.24828	5.42041e-20	7602	putative E3 ubiquitin-protein ligase LIN-1	GO:0004842, GO:0016567, GO:0005515	ubiquitin-protein transferase activity, protein ubiquitination, protein binding
Prupe.6G121700	3.70126	8.05954e-20	1577	agamous-like MADS-box protein AGL75	GO:0005634, GO:0046983, GO:0003677	nucleus, protein dimerization activity, DNA binding
Prupe.6G026200	2.78742	9.02918e-20	3923	oligopeptide transporter 1	GO:0055085, GO:0016020, GO:0016021, GO:0015031, GO:0005887, GO:0035673, GO:0035672, GO:0015833	transmembrane transport, membrane, integral component of membrane, protein transport, integral component of plasma membrane, oligopeptide transmembrane transporter activity, oligopeptide transmembrane transport, peptide transport
Prupe.6G019000	-6.51754	1.11049e-19	4663	beta-glucosidase 12	GO:0005975, GO:0004553, GO:0016787, GO:0008422, GO:0009651, GO:0019762	carbohydrate metabolic process, hydrolase activity, hydrolyzing O-glycosyl compounds, hydrolase activity, beta-glucosidase activity, response to salt stress, glucosinolate catabolic process
Prupe.3G089700	3.71889	1.25987e-19	2694	LEAF RUST 10 DISEASE-RESISTANCE LOCUS RECEPTOR-LIKE PROTEIN KINASE-like 2.2	GO:0005524, GO:0000166, GO:0016301, GO:0016310, GO:0016020, GO:0016021, GO:0016740, GO:0004672, GO:0006468, GO:0004674	ATP binding, nucleotide binding, kinase activity, phosphorylation, membrane, integral component of membrane, transferase activity, protein kinase activity, protein phosphorylation, protein serine/threonine kinase activity
Prupe.1G311500	2.48994	1.40312e-19	688	uncharacterized LOC18792289	#N/A	#N/A
Prupe.3G092000	-2.38906	1.47416e-19	2477	arogenate dehydrogenase 2, chloroplastic	GO:0055114, GO:0004665, GO:0008977, GO:0006571, GO:0009507	oxidation-reduction process, prephenate dehydrogenase (NADP+) activity, prephenate dehydrogenase (NAD+) activity, tyrosine biosynthetic process, chloroplast
Prupe.1G553200	4.13305	1.68013e-19	2510	---NA---	GO:0016020, GO:0016021	membrane, integral component of membrane
Prupe.1G281000	-6.47847	1.6816e-19	2915	mitotic checkpoint protein BUB3.3	GO:0043130, GO:0000776, GO:0007094, GO:0009524, GO:0033597, GO:1990298, GO:0005515	ubiquitin binding, kinetochore, mitotic spindle assembly checkpoint, phragmoplast, mitotic checkpoint complex, bub1-bub3 complex, protein binding
Prupe.1G587500	-2.31668	1.85968e-19	2152	tetraketide alpha-pyrone reductase 1	GO:0003824, GO:0050662, GO:0055114, GO:0016616	catalytic activity, obsolete coenzyme binding, oxidation-reduction process, oxidoreductase activity, acting on the CH-OH group of donors, NAD or NADP as acceptor
Prupe.1G091100	4.05519	2.02663e-19	5370	---NA---	GO:0016740, GO:0016757, GO:0016758, GO:0008194	transferase activity, transferase activity, transferring glycosyl groups, transferase activity, transferring hexosyl groups, UDP-glycosyltransferase activity
Prupe.7G125900	-2.33235	2.59157e-19	1399	---NA---	GO:0055085, GO:0016020, GO:0016021, GO:0015267, GO:0015250, GO:0006833	transmembrane transport, membrane, integral component of membrane, channel activity, water channel activity, water transport
Prupe.1G055000	4.79736	2.67741e-19	1031	probable glutathione S-transferase	GO:0006749, GO:0005737, GO:0004364, GO:0005515	glutathione metabolic process, cytoplasm, glutathione transferase activity, protein binding
Prupe.4G262500	-2.37122	2.72466e-19	4552	F-box protein At2g26850	GO:0005515	protein binding
Prupe.4G002400	-3.11188	3.33871e-19	5843	BTB/POZ domain-containing protein At5g47800	GO:0016567	protein ubiquitination
Prupe.1G080500	3.97835	3.53557e-19	1699	endochitinase EP3	GO:0005975, GO:0006952, GO:0004568, GO:0008061, GO:0006032, GO:0016998	carbohydrate metabolic process, defense response, chitinase activity, chitin binding, chitin catabolic process, cell wall macromolecule catabolic process
Prupe.6G047100	2.05531	3.53557e-19	2623	---NA---	GO:0016020, GO:0016021	membrane, integral component of membrane
Prupe.2G130400	4.54446	3.58507e-19	3099	receptor-like protein 12	GO:0005515	protein binding
Prupe.5G011800	-7.26483	3.87915e-19	2561	uncharacterized LOC18776664	GO:0016020, GO:0016021	membrane, integral component of membrane
Prupe.1G399800	4.75322	4.74004e-19	4816	glutamate receptor 2.7	GO:0016020, GO:0016021, GO:0006811, GO:0034220, GO:0007186, GO:0004930, GO:0004970, GO:0015276, GO:0005886, GO:0038023	membrane, integral component of membrane, ion transport, ion transmembrane transport, G protein-coupled receptor signaling pathway, G protein-coupled receptor activity, ionotropic glutamate receptor activity, ligand-gated ion channel activity, plasma membrane, signaling receptor activity
Prupe.2G021000	-2.5415	4.942e-19	2859	uncharacterized LOC18786067	GO:0003824, GO:0055114, GO:0003854, GO:0006694, GO:0016616	catalytic activity, oxidation-reduction process, 3-beta-hydroxy-delta5-steroid dehydrogenase activity, steroid biosynthetic process, oxidoreductase activity, acting on the CH-OH group of donors, NAD or NADP as acceptor
Prupe.8G031800	-2.97464	6.10439e-19	9218	TMV resistance protein N	GO:0007165, GO:0016787, GO:0043531, GO:0006952, GO:0005515, GO:0050135, GO:0061809	signal transduction, hydrolase activity, ADP binding, defense response, protein binding, NAD(P)+ nucleosidase activity, NAD+ nucleotidase, cyclic ADP-ribose generating
Prupe.8G011700	2.91075	9.42504e-19	3632	protein MAK16 homolog	GO:0005634, GO:0005730, GO:0000460, GO:0000470, GO:0030687	nucleus, nucleolus, maturation of 5.8S rRNA, maturation of LSU-rRNA, preribosome, large subunit precursor
Prupe.2G045000	4.4908	1.14277e-18	1262	probable carboxylesterase 15	GO:0016787	hydrolase activity
Prupe.7G130500	-11.1317	1.14277e-18	2062	---NA---	GO:0016747	transferase activity, transferring acyl groups other than amino-acyl groups
Prupe.1G397200	5.25569	1.36141e-18	2393	protein TIC 55, chloroplastic	GO:0055114, GO:0016020, GO:0016021, GO:0046872, GO:0009507, GO:0009536, GO:0051536, GO:0051537, GO:0010277	oxidation-reduction process, membrane, integral component of membrane, metal ion binding, chloroplast, plastid, iron-sulfur cluster binding, 2 iron, 2 sulfur cluster binding, chlorophyllide a oxygenase [overall] activity
Prupe.6G203500	-3.94647	1.38363e-18	1826	UDP-glycosyltransferase 91A1	GO:0016020, GO:0016021, GO:0016740, GO:0016758, GO:0008194, GO:0043231	membrane, integral component of membrane, transferase activity, transferase activity, transferring hexosyl groups, UDP-glycosyltransferase activity, intracellular membrane-bounded organelle
Prupe.8G053700	2.89436	1.61296e-18	1269	short-chain type dehydrogenase/reductase	GO:0055114	oxidation-reduction process
Prupe.1G334800	3.87873	1.628e-18	4177	MACPF domain-containing protein At1g14780	GO:0005886, GO:0009626	plasma membrane, plant-type hypersensitive response
Prupe.1G488300	-4.11033	1.95589e-18	1443	BTB/POZ domain-containing protein At4g08455	GO:0005737, GO:0043161, GO:0031625, GO:0030162, GO:0005515	cytoplasm, proteasome-mediated ubiquitin-dependent protein catabolic process, ubiquitin protein ligase binding, regulation of proteolysis, protein binding
Prupe.6G196500	-2.70425	2.13863e-18	1118	---NA---	GO:0016020, GO:0016021	membrane, integral component of membrane
Prupe.8G176400	-3.15098	2.13863e-18	5630	TMV resistance protein N	GO:0007165, GO:0016787, GO:0043531, GO:0006952, GO:0005515, GO:0050135, GO:0061809	signal transduction, hydrolase activity, ADP binding, defense response, protein binding, NAD(P)+ nucleosidase activity, NAD+ nucleotidase, cyclic ADP-ribose generating
Prupe.3G061900	4.23209	2.75786e-18	2185	ankyrin repeat-containing protein ITN1	GO:0016020, GO:0016021, GO:0005515	membrane, integral component of membrane, protein binding
Prupe.6G017300	4.61173	2.78043e-18	2417	---NA---	GO:0005524, GO:0000166, GO:0016301, GO:0016310, GO:0016020, GO:0016021, GO:0016740, GO:0004672, GO:0006468, GO:0004674, GO:0048544, GO:0106310, GO:0106311	ATP binding, nucleotide binding, kinase activity, phosphorylation, membrane, integral component of membrane, transferase activity, protein kinase activity, protein phosphorylation, protein serine/threonine kinase activity, recognition of pollen, ,
Prupe.1G480500	-3.77493	3.19741e-18	4267	phospholipase D alpha 1	GO:0003824, GO:0016787, GO:0005509, GO:0016020, GO:0004630, GO:0070290, GO:0016042, GO:0046470, GO:0005886, GO:0009395	catalytic activity, hydrolase activity, calcium ion binding, membrane, phospholipase D activity, N-acylphosphatidylethanolamine-specific phospholipase D activity, lipid catabolic process, phosphatidylcholine metabolic process, plasma membrane, phospholipid catabolic process
Prupe.8G226900	4.08968	3.902e-18	3226	MDIS1-interacting receptor like kinase 2	GO:0005524, GO:0016020, GO:0016021, GO:0004672, GO:0006468, GO:0005886, GO:0009755, GO:0005515	ATP binding, membrane, integral component of membrane, protein kinase activity, protein phosphorylation, plasma membrane, hormone-mediated signaling pathway, protein binding
Prupe.6G281200	3.19139	4.10823e-18	3665	receptor-like protein 12	GO:0016020, GO:0016021, GO:0005515	membrane, integral component of membrane, protein binding
Prupe.2G074500	3.6726	4.37246e-18	3119	---NA---	#N/A	#N/A
Prupe.2G150200	-10.9727	5.00725e-18	1616	glyoxylate/hydroxypyruvate reductase HPR3	GO:0055114, GO:0016491, GO:0016616, GO:0051287, GO:0005829, GO:0030267, GO:0016618	oxidation-reduction process, oxidoreductase activity, oxidoreductase activity, acting on the CH-OH group of donors, NAD or NADP as acceptor, NAD binding, cytosol, glyoxylate reductase (NADP) activity, hydroxypyruvate reductase activity
Prupe.1G503400	-2.17107	6.55486e-18	4869	uncharacterized protein At1g04910	GO:0016020, GO:0016021, GO:0016740, GO:0006004, GO:0016757	membrane, integral component of membrane, transferase activity, fucose metabolic process, transferase activity, transferring glycosyl groups
Prupe.8G050300	7.9575	6.61331e-18	2942	---NA---	#N/A	#N/A
Prupe.6G190300	12.9967	7.12447e-18	3026	7-deoxyloganetin glucosyltransferase	GO:0016740, GO:0016757, GO:0016758, GO:0008194, GO:0080043, GO:0080044	transferase activity, transferase activity, transferring glycosyl groups, transferase activity, transferring hexosyl groups, UDP-glycosyltransferase activity, quercetin 3-O-glucosyltransferase activity, quercetin 7-O-glucosyltransferase activity
Prupe.3G011300	-2.61914	7.48526e-18	1690	probable acyl-activating enzyme 5, peroxisomal	GO:0003824	catalytic activity
Prupe.6G156700	3.54623	7.48526e-18	4273	probable serine/threonine-protein kinase PBL3	GO:0005524, GO:0004672, GO:0006468	ATP binding, protein kinase activity, protein phosphorylation
Prupe.8G015600	10.9121	7.81861e-18	15975	---NA---	#N/A	#N/A
Prupe.1G545200	6.20153	8.04453e-18	5497	putative disease resistance protein RGA3	GO:0043531, GO:0006952, GO:0005515	ADP binding, defense response, protein binding
Prupe.4G067000	5.45693	8.46907e-18	750	---NA---	GO:0006970, GO:0006995, GO:0010037	response to osmotic stress, cellular response to nitrogen starvation, response to carbon dioxide
Prupe.1G539400	-2.45897	9.27898e-18	6545	serine hydroxymethyltransferase, mitochondrial	GO:0003824, GO:0016740, GO:0030170, GO:0006730, GO:0004372, GO:0035999, GO:0019264, GO:0005737, GO:0008270, GO:0050897, GO:0070905, GO:0006565, GO:0046653, GO:0046655	catalytic activity, transferase activity, pyridoxal phosphate binding, one-carbon metabolic process, glycine hydroxymethyltransferase activity, tetrahydrofolate interconversion, glycine biosynthetic process from serine, cytoplasm, zinc ion binding, cobalt ion binding, serine binding, L-serine catabolic process, tetrahydrofolate metabolic process, folic acid metabolic process
Prupe.8G094600	-4.22487	1.01198e-17	2905	probable pinoresinol-lariciresinol reductase 3	GO:0055114, GO:0016491	oxidation-reduction process, oxidoreductase activity
Prupe.3G017500	-4.06633	1.14163e-17	1653	cysteine-rich repeat secretory protein 60	GO:0016020, GO:0016021, GO:0009506	membrane, integral component of membrane, plasmodesma
Prupe.6G199800	-4.59471	1.39287e-17	3735	disease resistance protein RPM1	GO:0043531, GO:0006952, GO:0005515	ADP binding, defense response, protein binding
Prupe.6G181800	2.769	1.52164e-17	4971	---NA---	GO:0055114, GO:0016491, GO:0071949, GO:0003997, GO:0016627, GO:0006631, GO:0006635, GO:0005777, GO:0050660, GO:0005504, GO:0033540, GO:0055088	oxidation-reduction process, oxidoreductase activity, FAD binding, acyl-CoA oxidase activity, oxidoreductase activity, acting on the CH-CH group of donors, fatty acid metabolic process, fatty acid beta-oxidation, peroxisome, flavin adenine dinucleotide binding, fatty acid binding, fatty acid beta-oxidation using acyl-CoA oxidase, lipid homeostasis
Prupe.1G300000	2.72916	1.6383e-17	1705	uncharacterized LOC109949228	#N/A	#N/A
Prupe.7G057600	-2.52163	1.81261e-17	3703	---NA---	#N/A	#N/A
Prupe.8G097600	-4.69199	1.81261e-17	7432	cyclic nucleotide-gated ion channel 1	GO:0055085, GO:0005524, GO:0016020, GO:0016021, GO:0004672, GO:0006468, GO:0005216, GO:0006811, GO:0034220, GO:0030553	transmembrane transport, ATP binding, membrane, integral component of membrane, protein kinase activity, protein phosphorylation, ion channel activity, ion transport, ion transmembrane transport, cGMP binding
Prupe.5G034700	-2.83387	1.81453e-17	1524	uncharacterized LOC18775794	#N/A	#N/A
Prupe.2G117200	4.16753	1.88845e-17	4214	putative disease resistance protein At1g50180	GO:0043531, GO:0006952	ADP binding, defense response
Prupe.1G273900	10.6723	2.41297e-17	2314	F-box protein At2g26160	#N/A	#N/A
Prupe.6G034300	-10.6148	2.45524e-17	839	uncharacterized LOC18774560	GO:0003735, GO:0006412, GO:0005840, GO:0003723, GO:0022625	structural constituent of ribosome, translation, ribosome, RNA binding, cytosolic large ribosomal subunit
Prupe.3G056300	-4.23903	2.54556e-17	4046	polyadenylate-binding protein 4-like	GO:0003723, GO:0003676, GO:0005634, GO:0005829, GO:1990904, GO:0003730, GO:0008143, GO:0008266	RNA binding, nucleic acid binding, nucleus, cytosol, ribonucleoprotein complex, mRNA 3'-UTR binding, poly(A) binding, poly(U) RNA binding
Prupe.1G362100	6.00971	3.05959e-17	2491	GDSL esterase/lipase EXL3-like	GO:0016788, GO:0006629, GO:0016298	hydrolase activity, acting on ester bonds, lipid metabolic process, lipase activity
Prupe.1G336000	2.20754	3.07535e-17	2399	G-type lectin S-receptor-like serine/threonine-protein kinase At1g34300	GO:0005524, GO:0000166, GO:0016301, GO:0016310, GO:0016020, GO:0016021, GO:0016740, GO:0004672, GO:0006468, GO:0004674, GO:0048544, GO:0106310, GO:0106311	ATP binding, nucleotide binding, kinase activity, phosphorylation, membrane, integral component of membrane, transferase activity, protein kinase activity, protein phosphorylation, protein serine/threonine kinase activity, recognition of pollen, ,
Prupe.1G471700	2.2036	3.78243e-17	2122	6-hydroxynicotinate 3-monooxygenase	GO:0016020, GO:0016021, GO:0071949	membrane, integral component of membrane, FAD binding
Prupe.6G233300	-6.75079	4.30894e-17	1900	UDP-glycosyltransferase 86A1	GO:0016740, GO:0016757, GO:0016758, GO:0008194	transferase activity, transferase activity, transferring glycosyl groups, transferase activity, transferring hexosyl groups, UDP-glycosyltransferase activity
Prupe.4G027600	4.37533	4.99535e-17	1239	cysteine-rich receptor-like protein kinase 25	#N/A	#N/A
Prupe.4G284000	2.24724	6.37056e-17	4219	---NA---	GO:0043531, GO:0006952, GO:0005515	ADP binding, defense response, protein binding
Prupe.3G223200	-6.44146	7.94616e-17	2941	xyloglucan endotransglucosylase/hydrolase protein 9	GO:0005975, GO:0016787, GO:0016740, GO:0016798, GO:0008152, GO:0071555, GO:0005576, GO:0004553, GO:0005618, GO:0048046, GO:0016762, GO:0006073, GO:0010411, GO:0042546	carbohydrate metabolic process, hydrolase activity, transferase activity, hydrolase activity, acting on glycosyl bonds, metabolic process, cell wall organization, extracellular region, hydrolase activity, hydrolyzing O-glycosyl compounds, cell wall, apoplast, xyloglucan:xyloglucosyl transferase activity, cellular glucan metabolic process, xyloglucan metabolic process, cell wall biogenesis
Prupe.2G081200	-10.8074	8.38809e-17	16996	uncharacterized LOC18787803	GO:0016020, GO:0016021, GO:0005515	membrane, integral component of membrane, protein binding
Prupe.6G073500	2.62283	9.90011e-17	2084	scarecrow-like protein 30	GO:0005634, GO:0003700, GO:0043565, GO:0006355	nucleus, DNA-binding transcription factor activity, sequence-specific DNA binding, regulation of transcription, DNA-templated
Prupe.6G196800	-5.80752	1.0452e-16	5066	uncharacterized LOC18775564	GO:0005886	plasma membrane
Prupe.1G315200	4.88432	1.06169e-16	1211	---NA---	#N/A	#N/A
Prupe.I000500	2.85876	1.13841e-16	4657	ABC transporter C family member 3	GO:0005524, GO:0042626, GO:0016021, GO:0055085, GO:0000166, GO:0016020, GO:0016887, GO:0000325, GO:0005774	ATP binding, ATPase-coupled transmembrane transporter activity, integral component of membrane, transmembrane transport, nucleotide binding, membrane, ATPase activity, plant-type vacuole, vacuolar membrane
Prupe.1G526000	2.75776	1.22598e-16	1540	glutathione transferase GST 23	GO:0006749, GO:0005737, GO:0004364, GO:0005515	glutathione metabolic process, cytoplasm, glutathione transferase activity, protein binding
Prupe.1G147100	-6.56456	1.2423e-16	3079	F-box protein At3g07870	GO:0005515	protein binding
Prupe.1G307100	-12.1647	1.33652e-16	1481	protein ASPARTIC PROTEASE IN GUARD CELL 1	GO:0004190, GO:0006508	aspartic-type endopeptidase activity, proteolysis
Prupe.2G093300	9.10585	1.33652e-16	2588	rust resistance kinase Lr10-like	GO:0005524, GO:0000166, GO:0016301, GO:0016310, GO:0016020, GO:0016021, GO:0016740, GO:0004672, GO:0006468, GO:0030247	ATP binding, nucleotide binding, kinase activity, phosphorylation, membrane, integral component of membrane, transferase activity, protein kinase activity, protein phosphorylation, polysaccharide binding
Prupe.1G153000	3.67168	1.60516e-16	2856	---NA---	#N/A	#N/A
Prupe.8G152900	-10.9099	1.79903e-16	487	---NA---	GO:0006952, GO:0005576, GO:0005615	defense response, extracellular region, extracellular space
Prupe.1G161800	3.65859	2.22572e-16	2180	TMV resistance protein N	GO:0007165, GO:0016787, GO:0043531, GO:0005515, GO:0050135, GO:0061809	signal transduction, hydrolase activity, ADP binding, protein binding, NAD(P)+ nucleosidase activity, NAD+ nucleotidase, cyclic ADP-ribose generating
Prupe.3G145800	2.817	2.41847e-16	5349	LEAF RUST 10 DISEASE-RESISTANCE LOCUS RECEPTOR-LIKE PROTEIN KINASE-like 2.1	GO:0005524, GO:0000166, GO:0016301, GO:0016310, GO:0016020, GO:0016021, GO:0016740, GO:0004672, GO:0006468, GO:0030247	ATP binding, nucleotide binding, kinase activity, phosphorylation, membrane, integral component of membrane, transferase activity, protein kinase activity, protein phosphorylation, polysaccharide binding
Prupe.4G263100	6.95688	2.804e-16	2008	probable inactive 2-oxoglutarate-dependent dioxygenase AOP2	GO:0055114, GO:0016491, GO:0046872, GO:0051213	oxidation-reduction process, oxidoreductase activity, metal ion binding, dioxygenase activity
Prupe.4G264100	2.19254	3.0062e-16	9320	dihydropyrimidinase	GO:0016810, GO:0005737, GO:0016787, GO:0004157, GO:0006208	hydrolase activity, acting on carbon-nitrogen (but not peptide) bonds, cytoplasm, hydrolase activity, dihydropyrimidinase activity, pyrimidine nucleobase catabolic process
Prupe.5G073600	-3.56898	3.38855e-16	3872	---NA---	GO:0055085, GO:0016020, GO:0016021, GO:0022857, GO:0006857, GO:0015112, GO:0010167, GO:0015706	transmembrane transport, membrane, integral component of membrane, transmembrane transporter activity, oligopeptide transport, nitrate transmembrane transporter activity, response to nitrate, nitrate transport
Prupe.8G132300	-4.67952	4.20036e-16	3818	disease resistance protein RPM1	GO:0043531, GO:0006952	ADP binding, defense response
Prupe.4G041700	-5.58015	4.5587e-16	1784	polyphenol oxidase, chloroplastic	GO:0055114, GO:0016491, GO:0046872, GO:0004097, GO:0046148	oxidation-reduction process, oxidoreductase activity, metal ion binding, catechol oxidase activity, pigment biosynthetic process
Prupe.4G276500	3.26374	5.00848e-16	6534	lipase-like PAD4	GO:0005634, GO:0006629, GO:0016787, GO:0050829, GO:0005737, GO:0010105, GO:0010150, GO:0031348, GO:2000022, GO:1901183, GO:1900426, GO:0080151, GO:0080142, GO:0071327, GO:0010942, GO:0010618, GO:0010225, GO:0010310, GO:0002213, GO:0060866, GO:0009816, GO:0009862, GO:1900367, GO:0009625, GO:0001666, GO:0009617, GO:0009627, GO:0009751, GO:0051707, GO:2000031, GO:0042742, GO:0016020, GO:0016021	nucleus, lipid metabolic process, hydrolase activity, defense response to Gram-negative bacterium, cytoplasm, negative regulation of ethylene-activated signaling pathway, leaf senescence, negative regulation of defense response, regulation of jasmonic acid mediated signaling pathway, positive regulation of camalexin biosynthetic process, positive regulation of defense response to bacterium, posit…
Prupe.1G163700	-7.43216	5.58165e-16	7722	putative disease resistance protein RGA1	GO:0043531, GO:0006952	ADP binding, defense response
Prupe.7G135000	-2.16972	5.58165e-16	1770	cyclin-dependent kinase inhibitor 7	GO:0005634, GO:0004861, GO:0007050, GO:0005654, GO:0004860, GO:0006469, GO:0045736	nucleus, cyclin-dependent protein serine/threonine kinase inhibitor activity, cell cycle arrest, nucleoplasm, protein kinase inhibitor activity, negative regulation of protein kinase activity, negative regulation of cyclin-dependent protein serine/threonine kinase activity
Prupe.1G441000	-6.22789	5.90117e-16	3667	uncharacterized LOC18791207	GO:0016787, GO:0008233, GO:0006508, GO:0005576, GO:0004185, GO:0004180, GO:0005773	hydrolase activity, peptidase activity, proteolysis, extracellular region, serine-type carboxypeptidase activity, carboxypeptidase activity, vacuole
Prupe.3G048300	2.96809	6.51564e-16	3910	beta-fructofuranosidase, cell wall isozyme	GO:0005975, GO:0016787, GO:0016798, GO:0008152, GO:0004553	carbohydrate metabolic process, hydrolase activity, hydrolase activity, acting on glycosyl bonds, metabolic process, hydrolase activity, hydrolyzing O-glycosyl compounds
Prupe.1G430900	-7.7463	6.62004e-16	2094	uncharacterized LOC18792434	GO:0016020, GO:0016021,	membrane, integral component of membrane,
Prupe.1G492500	4.165	6.88816e-16	4445	metal transporter Nramp5	GO:0016020, GO:0016021, GO:0046873, GO:0030001, GO:0071421, GO:0005384, GO:0015086, GO:0070574	membrane, integral component of membrane, metal ion transmembrane transporter activity, metal ion transport, manganese ion transmembrane transport, manganese ion transmembrane transporter activity, cadmium ion transmembrane transporter activity, cadmium ion transmembrane transport
Prupe.1G388500	-2.06104	7.57002e-16	3858	ent-kaurene oxidase, chloroplastic	GO:0055114, GO:0016491, GO:0016020, GO:0016021, GO:0046872, GO:0004497, GO:0005506, GO:0016705, GO:0020037, GO:0005783, GO:0009707, GO:0009686, GO:0010241, GO:0016709	oxidation-reduction process, oxidoreductase activity, membrane, integral component of membrane, metal ion binding, monooxygenase activity, iron ion binding, oxidoreductase activity, acting on paired donors, with incorporation or reduction of molecular oxygen, heme binding, endoplasmic reticulum, chloroplast outer membrane, gibberellin biosynthetic process, ent-kaurene oxidation to kaurenoic acid,…
Prupe.8G252100	-2.41828	8.7554e-16	2229	secoisolariciresinol dehydrogenase	GO:0016491, GO:0055114	oxidoreductase activity, oxidation-reduction process
Prupe.1G263400	-4.90961	1.01819e-15	6519	disease resistance protein TAO1	GO:0007165, GO:0016787, GO:0043531, GO:0006952, GO:0005515, GO:0050135, GO:0061809	signal transduction, hydrolase activity, ADP binding, defense response, protein binding, NAD(P)+ nucleosidase activity, NAD+ nucleotidase, cyclic ADP-ribose generating
Prupe.5G044700	-3.17354	1.04705e-15	2016	---NA---	#N/A	#N/A
Prupe.8G010000	2.24613	1.04705e-15	2755	---NA---	GO:0043531, GO:0006952	ADP binding, defense response
Prupe.3G033500	3.84513	1.06147e-15	1620	GDSL esterase/lipase 2	GO:0016788, GO:0016298	hydrolase activity, acting on ester bonds, lipase activity
Prupe.1G296600	4.14542	1.07505e-15	2466	cytochrome P450 CYP749A22	GO:0055114, GO:0016491, GO:0016020, GO:0016021, GO:0046872, GO:0004497, GO:0005506, GO:0016705, GO:0020037	oxidation-reduction process, oxidoreductase activity, membrane, integral component of membrane, metal ion binding, monooxygenase activity, iron ion binding, oxidoreductase activity, acting on paired donors, with incorporation or reduction of molecular oxygen, heme binding
Prupe.3G059900	5.9795	1.07653e-15	8919	---NA---	GO:0005524, GO:0000166, GO:0016020, GO:0016021, GO:0042626, GO:0055085, GO:0016887	ATP binding, nucleotide binding, membrane, integral component of membrane, ATPase-coupled transmembrane transporter activity, transmembrane transport, ATPase activity
Prupe.3G226700	2.85235	1.10117e-15	6120	---NA---	GO:0005524, GO:0016020, GO:0016021, GO:0004672, GO:0006468, GO:0048544, GO:0030247, GO:0005886, GO:0004674	ATP binding, membrane, integral component of membrane, protein kinase activity, protein phosphorylation, recognition of pollen, polysaccharide binding, plasma membrane, protein serine/threonine kinase activity
Prupe.8G046500	-6.97343	1.27037e-15	4030	TMV resistance protein N	GO:0007165, GO:0016787, GO:0043531, GO:0006952, GO:0005515, GO:0050135, GO:0061809	signal transduction, hydrolase activity, ADP binding, defense response, protein binding, NAD(P)+ nucleosidase activity, NAD+ nucleotidase, cyclic ADP-ribose generating
Prupe.8G254800	-2.78819	1.442e-15	4082	BTB/POZ domain-containing protein At1g03010	GO:0016567, GO:0005515	protein ubiquitination, protein binding
Prupe.1G211200	2.98659	1.69805e-15	1317	uncharacterized LOC18792350	GO:0005634, GO:0009620	nucleus, response to fungus
Prupe.3G043400	-2.76821	1.70518e-15	1379	protein BIG GRAIN 1-like A	GO:0005886, GO:0016020, GO:0009734	plasma membrane, membrane, auxin-activated signaling pathway
Prupe.1G446400	3.32838	1.80426e-15	2009	---NA---	GO:0005737, GO:0005886, GO:0016020, GO:0032515, GO:0005634, GO:0038023, GO:0009738, GO:0004864, GO:0010427, GO:0080163	cytoplasm, plasma membrane, membrane, negative regulation of phosphoprotein phosphatase activity, nucleus, signaling receptor activity, abscisic acid-activated signaling pathway, protein phosphatase inhibitor activity, abscisic acid binding, regulation of protein serine/threonine phosphatase activity
Prupe.8G054700	6.17242	1.85982e-15	759	---NA---	#N/A	#N/A
Prupe.4G167900	5.34459	1.9977e-15	2850	protein DJ-1 homolog B	GO:0005634, GO:0005829, GO:0036524, GO:0036529, GO:0106046	nucleus, cytosol, protein deglycase activity, protein deglycation, glyoxal removal, guanine deglycation, glyoxal removal
Prupe.6G245600	2.84335	2.29094e-15	2302	protein ALUMINUM SENSITIVE 3	GO:0016020, GO:0016021, GO:0012506, GO:0005460, GO:0010044, GO:0005887, GO:0015786	membrane, integral component of membrane, vesicle membrane, UDP-glucose transmembrane transporter activity, response to aluminum ion, integral component of plasma membrane, UDP-glucose transmembrane transport
Prupe.2G286700	2.91502	2.32614e-15	1634	probable carboxylesterase 120	GO:0016787	hydrolase activity
Prupe.3G126400	3.33781	2.66484e-15	12182	---NA---	GO:0003924, GO:0005525, GO:1990904	GTPase activity, GTP binding, ribonucleoprotein complex
Prupe.4G278100	-10.0255	2.69029e-15	2366	---NA---	#N/A	#N/A
Prupe.8G234000	3.69697	2.85946e-15	1526	---NA---	GO:0005509	calcium ion binding
Prupe.6G133500	-2.23493	3.24553e-15	2805	40S ribosomal protein S14	GO:0003735, GO:0006412, GO:0005840, GO:0000462, GO:0022627, GO:0000028, GO:0070181, GO:0048027	structural constituent of ribosome, translation, ribosome, maturation of SSU-rRNA from tricistronic rRNA transcript (SSU-rRNA, 5.8S rRNA, LSU-rRNA), cytosolic small ribosomal subunit, ribosomal small subunit assembly, small ribosomal subunit rRNA binding, mRNA 5'-UTR binding
Prupe.4G008600	3.27352	3.26331e-15	3062	cytochrome b561 and DOMON domain-containing protein At5g47530	GO:0055114, GO:0016020, GO:0016021, GO:0046872	oxidation-reduction process, membrane, integral component of membrane, metal ion binding
Prupe.1G515200	-2.87179	3.32629e-15	2165	annexin D1	GO:0005509, GO:0005544, GO:0046872, GO:0098869, GO:0005737	calcium ion binding, calcium-dependent phospholipid binding, metal ion binding, cellular oxidant detoxification, cytoplasm
Prupe.3G264100	-3.58933	3.56147e-15	5097	phosphate transporter PHO1 homolog 9	GO:0016020, GO:0016021, GO:0006817, GO:0005737, GO:0005886, GO:0005802, GO:0005794, GO:0000822, GO:0015114, GO:0016036, GO:0035435	membrane, integral component of membrane, phosphate ion transport, cytoplasm, plasma membrane, trans-Golgi network, Golgi apparatus, inositol hexakisphosphate binding, phosphate ion transmembrane transporter activity, cellular response to phosphate starvation, phosphate ion transmembrane transport
Prupe.1G491000	-3.69923	3.66293e-15	3328	amino acid permease 3	GO:0016020, GO:0016021, GO:0009734, GO:0055085, GO:0005886, GO:0015293, GO:0006865	membrane, integral component of membrane, auxin-activated signaling pathway, transmembrane transport, plasma membrane, symporter activity, amino acid transport
Prupe.1G422200	-3.63915	4.32784e-15	8930	LIM domain-containing protein WLIM1	GO:0046872, GO:0005886, GO:0051015, GO:0051017, GO:0015629, GO:0003729	metal ion binding, plasma membrane, actin filament binding, actin filament bundle assembly, actin cytoskeleton, mRNA binding
Prupe.5G005900	-3.57683	4.65728e-15	3171	increased DNA methylation 3	, GO:1901537, GO:0005634	, positive regulation of DNA demethylation, nucleus
Prupe.2G070300	-10.0322	4.68545e-15	2559	---NA---	GO:0005634, GO:0006355, GO:0003700, GO:0003677	nucleus, regulation of transcription, DNA-templated, DNA-binding transcription factor activity, DNA binding
Prupe.8G041600	10.7042	4.83794e-15	3699	tryptophan aminotransferase-related protein 4	GO:0003824, GO:0016020, GO:0016021, GO:0008483, GO:0016846	catalytic activity, membrane, integral component of membrane, transaminase activity, carbon-sulfur lyase activity
Prupe.1G481600	3.61524	5.05462e-15	4546	probable LRR receptor-like serine/threonine-protein kinase At1g56130	GO:0016020, GO:0016021, GO:0005886, GO:0004674, GO:0046777, GO:0005515, GO:0106310, GO:0106311	membrane, integral component of membrane, plasma membrane, protein serine/threonine kinase activity, protein autophosphorylation, protein binding, ,
Prupe.2G099700	10.7596	5.59824e-15	932	---NA---	GO:0005515	protein binding
Prupe.6G189900	11.5317	5.65644e-15	2767	7-deoxyloganetin glucosyltransferase-like	GO:0016740, GO:0016757, GO:0016758, GO:0008194, GO:0080043, GO:0080044	transferase activity, transferase activity, transferring glycosyl groups, transferase activity, transferring hexosyl groups, UDP-glycosyltransferase activity, quercetin 3-O-glucosyltransferase activity, quercetin 7-O-glucosyltransferase activity
Prupe.6G352900	2.49206	5.76517e-15	2488	rust resistance kinase Lr10	GO:0005524, GO:0000166, GO:0016301, GO:0016310, GO:0016020, GO:0016021, GO:0016740, GO:0004672, GO:0006468, GO:0030247	ATP binding, nucleotide binding, kinase activity, phosphorylation, membrane, integral component of membrane, transferase activity, protein kinase activity, protein phosphorylation, polysaccharide binding
Prupe.2G273500	2.89993	5.95925e-15	2459	derlin-1.1	GO:0005789, GO:0016020, GO:0016021, GO:0005783, GO:0051787, GO:0030176, GO:0030433, GO:1990381, GO:0030968, GO:0000839	endoplasmic reticulum membrane, membrane, integral component of membrane, endoplasmic reticulum, misfolded protein binding, integral component of endoplasmic reticulum membrane, ubiquitin-dependent ERAD pathway, ubiquitin-specific protease binding, endoplasmic reticulum unfolded protein response, Hrd1p ubiquitin ligase ERAD-L complex
Prupe.1G470400	9.27196	6.02755e-15	1567	uncharacterized LOC18792419	GO:0016020, GO:0016021	membrane, integral component of membrane
Prupe.8G210400	5.41179	6.45537e-15	1285	probable glutathione S-transferase	GO:0006749, GO:0005737, GO:0004364, GO:0005515	glutathione metabolic process, cytoplasm, glutathione transferase activity, protein binding
Prupe.5G198400	2.89656	6.46608e-15	1446	---NA---	GO:0046872	metal ion binding
Prupe.8G096000	3.23032	6.91614e-15	2037	epoxide hydrolase 4	#N/A	#N/A
Prupe.3G199200	-3.43437	7.10701e-15	3269	---NA---	GO:0016020, GO:0016021, GO:0005515	membrane, integral component of membrane, protein binding
Prupe.8G046800	-9.78882	7.97848e-15	2809	laccase-15	GO:0055114, GO:0016491, GO:0046872, GO:0005576, GO:0005507, GO:0052716, GO:0046274, GO:0048046	oxidation-reduction process, oxidoreductase activity, metal ion binding, extracellular region, copper ion binding, hydroquinone:oxygen oxidoreductase activity, lignin catabolic process, apoplast
Prupe.6G311400	10.2332	8.21172e-15	1908	acidic leucine-rich nuclear phosphoprotein 32 family member B	#N/A	#N/A
Prupe.8G148400	-3.16841	9.30719e-15	5148	---NA---	GO:0006508, GO:0004185, GO:0016747, GO:0019748	proteolysis, serine-type carboxypeptidase activity, transferase activity, transferring acyl groups other than amino-acyl groups, secondary metabolic process
Prupe.3G158900	3.03533	9.7262e-15	2195	uncharacterized LOC18783089	GO:0016020, GO:0016021	membrane, integral component of membrane
Prupe.2G185000	-2.04979	1.0062e-14	1781	---NA---	GO:0055114, GO:0016491, GO:0016616, GO:0003854, GO:0006694	oxidation-reduction process, oxidoreductase activity, oxidoreductase activity, acting on the CH-OH group of donors, NAD or NADP as acceptor, 3-beta-hydroxy-delta5-steroid dehydrogenase activity, steroid biosynthetic process
Prupe.4G272900	5.5315	1.02265e-14	926	uncharacterized LOC18778644	#N/A	#N/A
Prupe.1G257300	-3.86931	1.08111e-14	2842	uncharacterized LOC18791117	GO:0016020, GO:0016021, GO:0022857, GO:0055085, GO:0005886	membrane, integral component of membrane, transmembrane transporter activity, transmembrane transport, plasma membrane
Prupe.6G136900	2.15296	1.11732e-14	1376	UDP-glycosyltransferase 88B1	GO:0016740, GO:0016757, GO:0016758, GO:0008194	transferase activity, transferase activity, transferring glycosyl groups, transferase activity, transferring hexosyl groups, UDP-glycosyltransferase activity
Prupe.6G281900	2.25215	1.24942e-14	2738	---NA---	GO:0016020, GO:0016021, GO:0005887, GO:0008519, GO:0015696, GO:0072488, GO:0019740	membrane, integral component of membrane, integral component of plasma membrane, ammonium transmembrane transporter activity, ammonium transport, ammonium transmembrane transport, nitrogen utilization
Prupe.1G364500	2.34358	1.26705e-14	4696	uncharacterized LOC18793969	GO:0045927	positive regulation of growth
Prupe.4G055500	2.60249	1.28357e-14	1641	pathogenesis-related genes transcriptional activator PTI5	GO:0005634, GO:0003677, GO:0006355, GO:0003700, GO:0006351	nucleus, DNA binding, regulation of transcription, DNA-templated, DNA-binding transcription factor activity, transcription, DNA-templated
Prupe.2G078300	-2.49822	1.44247e-14	1541	---NA---	GO:0000166, GO:0005524, GO:0016787, GO:0003676, GO:0004386, GO:0003724, GO:0003723, GO:0071013, GO:0000390	nucleotide binding, ATP binding, hydrolase activity, nucleic acid binding, helicase activity, RNA helicase activity, RNA binding, catalytic step 2 spliceosome, spliceosomal complex disassembly
Prupe.6G034400	-8.46672	1.54202e-14	2387	---NA---	#N/A	#N/A
Prupe.I002900	5.48557	1.61782e-14	2366	tyrosine-sulfated glycopeptide receptor 1	GO:0016021, GO:0016020, GO:0005515	integral component of membrane, membrane, protein binding
Prupe.2G325000	3.67752	1.63414e-14	2739	wall-associated receptor kinase-like 22	GO:0005524, GO:0016020, GO:0016021, GO:0004672, GO:0006468, GO:0005886, GO:0004674, GO:0007166	ATP binding, membrane, integral component of membrane, protein kinase activity, protein phosphorylation, plasma membrane, protein serine/threonine kinase activity, cell surface receptor signaling pathway
Prupe.1G230500	4.6046	1.71742e-14	2217	geraniol 8-hydroxylase	GO:0055114, GO:0016491, GO:0046872, GO:0004497, GO:0005506, GO:0016705, GO:0020037	oxidation-reduction process, oxidoreductase activity, metal ion binding, monooxygenase activity, iron ion binding, oxidoreductase activity, acting on paired donors, with incorporation or reduction of molecular oxygen, heme binding
Prupe.7G132200	-4.07107	1.73298e-14	752	protein RALF-like 34	GO:0005576, GO:0009506, GO:0019722	extracellular region, plasmodesma, calcium-mediated signaling
Prupe.6G315500	-2.02813	1.78018e-14	5824	uncharacterized LOC18773645	GO:0003676, GO:0006139, GO:0090305, GO:0008408	nucleic acid binding, nucleobase-containing compound metabolic process, nucleic acid phosphodiester bond hydrolysis, 3'-5' exonuclease activity
Prupe.1G545300	5.0677	1.78701e-14	3892	putative disease resistance protein RGA3	GO:0043531, GO:0006952, GO:0005515	ADP binding, defense response, protein binding
Prupe.7G198300	-11.5048	1.78701e-14	2264	---NA---	GO:0055114, GO:0016491, GO:0046872, GO:0004497, GO:0005506, GO:0016705, GO:0020037	oxidation-reduction process, oxidoreductase activity, metal ion binding, monooxygenase activity, iron ion binding, oxidoreductase activity, acting on paired donors, with incorporation or reduction of molecular oxygen, heme binding
Prupe.5G093500	-10.7021	2.04676e-14	1613	thaumatin-like protein	GO:0005576, GO:0006952	extracellular region, defense response
Prupe.1G444700	4.18388	2.52427e-14	3753	receptor-like protein kinase HSL1	GO:0005524, GO:0000166, GO:0016301, GO:0016310, GO:0016020, GO:0016021, GO:0016740, GO:0004672, GO:0006468, GO:0004674, GO:0005515	ATP binding, nucleotide binding, kinase activity, phosphorylation, membrane, integral component of membrane, transferase activity, protein kinase activity, protein phosphorylation, protein serine/threonine kinase activity, protein binding
Prupe.1G436900	-3.76873	2.64805e-14	601	---NA---	GO:0005509	calcium ion binding
Prupe.4G169200	3.51266	2.64805e-14	2446	receptor-like protein 2	GO:0016020, GO:0016021, GO:0005515	membrane, integral component of membrane, protein binding
Prupe.1G308600	2.89774	2.68986e-14	2546	suppressor protein SRP40	GO:0015031, GO:0006979, GO:0008104	protein transport, response to oxidative stress, protein localization
Prupe.1G412700	2.34306	2.87042e-14	5049	---NA---	GO:0016020, GO:0016021, GO:0006811, GO:0034220, GO:0004970, GO:0015276, GO:0005886, GO:0038023	membrane, integral component of membrane, ion transport, ion transmembrane transport, ionotropic glutamate receptor activity, ligand-gated ion channel activity, plasma membrane, signaling receptor activity
Prupe.7G059200	3.35622	2.87208e-14	2703	receptor-like protein 12	GO:0016020, GO:0016021, GO:0005515	membrane, integral component of membrane, protein binding
Prupe.6G212900	3.30192	3.05934e-14	1560	uncharacterized LOC18774087	#N/A	#N/A
Prupe.3G041600	-4.68898	3.2708e-14	2980	uncharacterized LOC18783620	GO:0016020, GO:0016021	membrane, integral component of membrane
Prupe.7G124000	2.86366	3.30605e-14	2496	UDP-glycosyltransferase 73D1	GO:0016740, GO:0016757, GO:0016758, GO:0008194	transferase activity, transferase activity, transferring glycosyl groups, transferase activity, transferring hexosyl groups, UDP-glycosyltransferase activity
Prupe.1G348100	-4.47745	3.38519e-14	4555	serine carboxypeptidase-like 35	GO:0016787, GO:0008233, GO:0006508, GO:0005576, GO:0004185, GO:0004180, GO:0005773	hydrolase activity, peptidase activity, proteolysis, extracellular region, serine-type carboxypeptidase activity, carboxypeptidase activity, vacuole
Prupe.1G278500	5.413	3.45e-14	2127	galactoside 2-alpha-L-fucosyltransferase	GO:0005794, GO:0016020, GO:0016021, GO:0016740, GO:0071555, GO:0016757, GO:0042546, GO:0036065, GO:0032580, GO:0008107, GO:0009969, GO:0008417	Golgi apparatus, membrane, integral component of membrane, transferase activity, cell wall organization, transferase activity, transferring glycosyl groups, cell wall biogenesis, fucosylation, Golgi cisterna membrane, galactoside 2-alpha-L-fucosyltransferase activity, xyloglucan biosynthetic process, fucosyltransferase activity
Prupe.1G163600	-4.34392	3.72261e-14	10749	putative disease resistance protein RGA1	GO:0043531, GO:0006952, GO:0016020, GO:0016021	ADP binding, defense response, membrane, integral component of membrane
Prupe.1G542800	-3.53363	4.16427e-14	5177	probable disease resistance protein At4g27220	GO:0043531, GO:0005515	ADP binding, protein binding
Prupe.6G224900	2.02067	4.29555e-14	3259	probable protein phosphatase 2C 78	GO:0016787, GO:0046872, GO:0016791, GO:0016311, GO:0004721, GO:0043169, GO:0006470, GO:0004722, GO:0106306, GO:0106307	hydrolase activity, metal ion binding, phosphatase activity, dephosphorylation, phosphoprotein phosphatase activity, cation binding, protein dephosphorylation, protein serine/threonine phosphatase activity, ,
Prupe.2G234200	-3.04064	4.66189e-14	5936	probable mediator of RNA polymerase II transcription subunit 37c	GO:0000166, GO:0005524, GO:0005737, GO:0051082, GO:0016887, GO:0031072, GO:0044183, GO:0051787, GO:0034620, GO:0042026, GO:0051085	nucleotide binding, ATP binding, cytoplasm, unfolded protein binding, ATPase activity, heat shock protein binding, protein folding chaperone, misfolded protein binding, cellular response to unfolded protein, protein refolding, chaperone cofactor-dependent protein refolding
Prupe.6G042500	2.09586	5.22005e-14	4678	uncharacterized LOC18774318	#N/A	#N/A
Prupe.4G257600	2.87221	6.32695e-14	2056	BURP domain-containing protein 3	#N/A	#N/A
Prupe.6G062500	2.30894	6.9039e-14	3578	calmodulin-binding receptor-like cytoplasmic kinase 2	GO:0005524, GO:0000166, GO:0016301, GO:0016310, GO:0016740, GO:0004672, GO:0006468, GO:0004674, GO:0004683, GO:0005516, GO:0009409, GO:0009651, GO:0009737, GO:0042542	ATP binding, nucleotide binding, kinase activity, phosphorylation, transferase activity, protein kinase activity, protein phosphorylation, protein serine/threonine kinase activity, calmodulin-dependent protein kinase activity, calmodulin binding, response to cold, response to salt stress, response to abscisic acid, response to hydrogen peroxide
Prupe.6G112800	-2.99376	6.9039e-14	4262	---NA---	GO:0004784, GO:0055114, GO:0016491, GO:0046872, GO:0006801, GO:0019430, GO:0098869, GO:0016209, GO:0048046, GO:0009579, GO:0071484, GO:0071457, GO:0071329, GO:0035195, GO:0046688, GO:0071472, GO:0010039, GO:0071493, GO:0009570, GO:0005615, GO:0005507	superoxide dismutase activity, oxidation-reduction process, oxidoreductase activity, metal ion binding, superoxide metabolic process, removal of superoxide radicals, cellular oxidant detoxification, antioxidant activity, apoplast, thylakoid, cellular response to light intensity, cellular response to ozone, cellular response to sucrose stimulus, gene silencing by miRNA, response to copper ion, cel…
Prupe.8G056100	2.30037	7.87317e-14	3618	probable leucine-rich repeat receptor-like protein kinase At2g33170	GO:0005524, GO:0016020, GO:0016021, GO:0004672, GO:0006468, GO:0005886, GO:0005515	ATP binding, membrane, integral component of membrane, protein kinase activity, protein phosphorylation, plasma membrane, protein binding
Prupe.4G171800	5.32751	8.74565e-14	7046	glutamate receptor 2.8	GO:0016020, GO:0016021, GO:0006811, GO:0034220, GO:0004970, GO:0015276, GO:0005886, GO:0038023	membrane, integral component of membrane, ion transport, ion transmembrane transport, ionotropic glutamate receptor activity, ligand-gated ion channel activity, plasma membrane, signaling receptor activity
Prupe.1G498200	6.66017	9.61e-14	2478	---NA---	#N/A	#N/A
Prupe.2G324900	2.51568	1.01307e-13	2594	ER lumen protein-retaining receptor	GO:0005789, GO:0016020, GO:0016021, GO:0005783, GO:0046923, GO:0006621, GO:0015031, GO:0006888, GO:0005801	endoplasmic reticulum membrane, membrane, integral component of membrane, endoplasmic reticulum, ER retention sequence binding, protein retention in ER lumen, protein transport, endoplasmic reticulum to Golgi vesicle-mediated transport, cis-Golgi network
Prupe.6G156300	4.03427	1.01814e-13	2010	beta-glucosidase 11	GO:0005975, GO:0004553, GO:0008422	carbohydrate metabolic process, hydrolase activity, hydrolyzing O-glycosyl compounds, beta-glucosidase activity
Prupe.1G387200	-3.65094	1.01858e-13	1464	cytochrome P450 CYP82D47	GO:0055114, GO:0016491, GO:0046872, GO:0004497, GO:0005506, GO:0016705, GO:0020037, GO:0098542	oxidation-reduction process, oxidoreductase activity, metal ion binding, monooxygenase activity, iron ion binding, oxidoreductase activity, acting on paired donors, with incorporation or reduction of molecular oxygen, heme binding, defense response to other organism
Prupe.4G278700	-8.45336	1.06309e-13	1092	---NA---	#N/A	#N/A
Prupe.4G179100	-2.96972	1.16001e-13	1414	Werner Syndrome-like exonuclease	GO:0003676, GO:0006139, GO:0090305, GO:0008408, GO:0005634, GO:0005737	nucleic acid binding, nucleobase-containing compound metabolic process, nucleic acid phosphodiester bond hydrolysis, 3'-5' exonuclease activity, nucleus, cytoplasm
Prupe.3G053100	7.18484	1.23262e-13	254	uncharacterized LOC109948275	#N/A	#N/A
Prupe.1G493500	2.26947	1.49698e-13	3728	aspartic proteinase Asp1	GO:0016787, GO:0004190, GO:0008233, GO:0006508	hydrolase activity, aspartic-type endopeptidase activity, peptidase activity, proteolysis
Prupe.4G282000	-2.94215	1.5312e-13	5985	fatty acid amide hydrolase	GO:0016020, GO:0016021, GO:0016787, GO:0004040	membrane, integral component of membrane, hydrolase activity, amidase activity
Prupe.4G253000	4.97555	1.77394e-13	2325	4-hydroxycoumarin synthase 1	GO:0009058, GO:0016740, GO:0016746, GO:0016747, GO:0030639	biosynthetic process, transferase activity, transferase activity, transferring acyl groups, transferase activity, transferring acyl groups other than amino-acyl groups, polyketide biosynthetic process
Prupe.6G232800	2.10467	1.83372e-13	5602	phosphoglycerate kinase	GO:0000166, GO:0005524, GO:0016301, GO:0016310, GO:0016740, GO:0006096, GO:0004618, GO:0008176, GO:0006400, GO:0106004, GO:0005829, GO:0006094, GO:0043531, GO:1903862	nucleotide binding, ATP binding, kinase activity, phosphorylation, transferase activity, glycolytic process, phosphoglycerate kinase activity, tRNA (guanine-N7-)-methyltransferase activity, tRNA modification, tRNA (guanine-N7)-methylation, cytosol, gluconeogenesis, ADP binding, positive regulation of oxidative phosphorylation
Prupe.2G299200	-6.58297	1.97435e-13	4736	protein DETOXIFICATION 35	GO:0055085, GO:0016020, GO:0016021, GO:0015297, GO:0015238, GO:0042910, GO:0042908, GO:0022857	transmembrane transport, membrane, integral component of membrane, antiporter activity, GO_0015238, xenobiotic transmembrane transporter activity, xenobiotic transport, transmembrane transporter activity
Prupe.4G093600	-11.0026	1.97437e-13	2811	---NA---	GO:0005524, GO:0016020, GO:0016021, GO:0005509, GO:0004672, GO:0006468, GO:0030247, GO:0005886, GO:0004674, GO:0007166	ATP binding, membrane, integral component of membrane, calcium ion binding, protein kinase activity, protein phosphorylation, polysaccharide binding, plasma membrane, protein serine/threonine kinase activity, cell surface receptor signaling pathway
Prupe.3G066800	9.7078	2.08678e-13	1146	---NA---	GO:0046872, GO:0051082, GO:0006457, GO:0031072, GO:0005829	metal ion binding, unfolded protein binding, protein folding, heat shock protein binding, cytosol
Prupe.3G029900	-3.81223	2.10363e-13	3499	uncharacterized LOC18782953	GO:0006629, GO:0016787	lipid metabolic process, hydrolase activity
Prupe.1G296700	-9.53472	2.12471e-13	2697	uncharacterized LOC109946698	#N/A	#N/A
Prupe.3G147600	9.3751	2.15434e-13	1839	---NA---	#N/A	#N/A
Prupe.2G175100	-4.84416	2.16559e-13	2795	probable polygalacturonase	GO:0005975, GO:0016787, GO:0004650, GO:0016798, GO:0008152, GO:0005618	carbohydrate metabolic process, hydrolase activity, polygalacturonase activity, hydrolase activity, acting on glycosyl bonds, metabolic process, cell wall
Prupe.8G194600	-9.54316	2.27206e-13	2078	probable endo-1,3(4)-beta-glucanase ARB_01444	GO:0016787, GO:0016798, GO:0008152, GO:0052861, GO:0052862	hydrolase activity, hydrolase activity, acting on glycosyl bonds, metabolic process, glucan endo-1,3-beta-glucanase activity, C-3 substituted reducing group, glucan endo-1,4-beta-glucanase activity, C-3 substituted reducing group
Prupe.6G024000	-3.14016	2.3148e-13	2514	probable L-type lectin-domain containing receptor kinase S.7	GO:0005886, GO:0005524, GO:0000166, GO:0016301, GO:0016310, GO:0016020, GO:0016021, GO:0016740, GO:0030246, GO:0004672, GO:0006468, GO:0007178, GO:0004675, GO:0002229, GO:0042742	plasma membrane, ATP binding, nucleotide binding, kinase activity, phosphorylation, membrane, integral component of membrane, transferase activity, carbohydrate binding, protein kinase activity, protein phosphorylation, transmembrane receptor protein serine/threonine kinase signaling pathway, transmembrane receptor protein serine/threonine kinase activity, defense response to oomycetes, defense r…
Prupe.5G174200	-2.84499	2.37627e-13	1741	transcription factor WER	GO:0005634, GO:0003677, GO:0030154, GO:0000976	nucleus, DNA binding, cell differentiation, transcription regulatory region sequence-specific DNA binding
Prupe.2G099600	6.53679	2.41657e-13	1923	probable LRR receptor-like serine/threonine-protein kinase At4g36180	GO:0016020, GO:0016021, GO:0005515	membrane, integral component of membrane, protein binding
Prupe.6G196000	-2.36159	2.44602e-13	3600	zinc-finger homeodomain protein 1	GO:0005634, GO:0003677, GO:0006355, GO:0010371, GO:0010431, GO:0003700, GO:0000976	nucleus, DNA binding, regulation of transcription, DNA-templated, regulation of gibberellin biosynthetic process, seed maturation, DNA-binding transcription factor activity, transcription regulatory region sequence-specific DNA binding
Prupe.1G492300	-3.72876	2.49786e-13	1036	uncharacterized LOC18792397	#N/A	#N/A
Prupe.1G493700	4.64126	2.58377e-13	2701	dnaJ homolog subfamily A member 2	GO:0051082, GO:0006457, GO:0005829, GO:0051085, GO:0051087	unfolded protein binding, protein folding, cytosol, chaperone cofactor-dependent protein refolding, chaperone binding
Prupe.1G179000	-4.96358	2.58722e-13	1752	---NA---	GO:0016740, GO:0016757, GO:0016758, GO:0008194	transferase activity, transferase activity, transferring glycosyl groups, transferase activity, transferring hexosyl groups, UDP-glycosyltransferase activity
Prupe.6G069400	12.9703	2.58722e-13	614	---NA---	#N/A	#N/A
Prupe.6G145900	-2.1461	2.94665e-13	1841	---NA---	GO:0016020, GO:0016021	membrane, integral component of membrane
Prupe.6G014400	-2.01612	2.9917e-13	23071	callose synthase 3	GO:0016020, GO:0016021, GO:0016740, GO:0071555, GO:0016757, GO:0003843, GO:0006075, GO:0000148, GO:0005886, GO:0046527, GO:0008360	membrane, integral component of membrane, transferase activity, cell wall organization, transferase activity, transferring glycosyl groups, 1,3-beta-D-glucan synthase activity, (1->3)-beta-D-glucan biosynthetic process, 1,3-beta-D-glucan synthase complex, plasma membrane, glucosyltransferase activity, regulation of cell shape
Prupe.4G261600	-9.73918	3.2966e-13	854	uncharacterized LOC18781408	#N/A	#N/A
Prupe.3G250400	2.91781	3.31487e-13	3682	COBRA-like protein 1	GO:0010215, GO:0031225, GO:0052324, GO:0046658	cellulose microfibril organization, anchored component of membrane, plant-type cell wall cellulose biosynthetic process, anchored component of plasma membrane
Prupe.1G260900	3.16556	3.33748e-13	1310	protein JINGUBANG	GO:0005515	protein binding
Prupe.1G318800	-2.58344	3.33748e-13	652	---NA---	#N/A	#N/A
Prupe.1G495800	2.1972	3.44983e-13	1535	---NA---	#N/A	#N/A
Prupe.3G116100	-10.194	3.84657e-13	2585	probable leucine-rich repeat receptor-like protein kinase At1g35710	GO:0005524, GO:0016020, GO:0016021, GO:0004672, GO:0006468, GO:0005886, GO:0009755, GO:0005515	ATP binding, membrane, integral component of membrane, protein kinase activity, protein phosphorylation, plasma membrane, hormone-mediated signaling pathway, protein binding
Prupe.8G177000	-6.99323	3.98386e-13	2277	probable flavin-containing monooxygenase 1	GO:0055114, GO:0016491, GO:0050660, GO:0004497, GO:0050661, GO:0004499	oxidation-reduction process, oxidoreductase activity, flavin adenine dinucleotide binding, monooxygenase activity, NADP binding, N,N-dimethylaniline monooxygenase activity
Prupe.2G094300	3.41037	4.2508e-13	458	glutaredoxin-C9	GO:0005737, GO:0015035, GO:0055114, GO:0009055, GO:0045454, GO:0005623	cytoplasm, protein disulfide oxidoreductase activity, oxidation-reduction process, electron transfer activity, cell redox homeostasis, obsolete cell
Prupe.8G020800	3.32489	4.2508e-13	1891	pathogen-related protein	#N/A	#N/A
Prupe.8G021300	4.18201	4.2508e-13	2036	pathogen-related protein	#N/A	#N/A
Prupe.8G050200	5.77066	4.39972e-13	2703	---NA---	GO:0005525, GO:0003924, GO:0006614, GO:0048500	GTP binding, GTPase activity, SRP-dependent cotranslational protein targeting to membrane, signal recognition particle
Prupe.1G524700	3.34573	4.68299e-13	1837	putative clathrin assembly protein At4g40080	GO:0005794, GO:0031410, GO:0005543, GO:0006897, GO:0005905, GO:0000149, GO:0072583, GO:0030136, GO:0005545, GO:0005546, GO:0032050, GO:0006900	Golgi apparatus, cytoplasmic vesicle, phospholipid binding, endocytosis, clathrin-coated pit, SNARE binding, clathrin-dependent endocytosis, clathrin-coated vesicle, 1-phosphatidylinositol binding, phosphatidylinositol-4,5-bisphosphate binding, clathrin heavy chain binding, vesicle budding from membrane
Prupe.1G496800	-3.06524	5.0228e-13	2060	FBD-associated F-box protein At5g38590	GO:0005515	protein binding
Prupe.4G226200	3.26728	5.38226e-13	3782	---NA---	#N/A	#N/A
Prupe.7G106900	-6.6328	5.38988e-13	3710	---NA---	GO:0016020, GO:0016021, GO:0006811, GO:0034220, GO:0004970, GO:0015276, GO:0005886, GO:0038023	membrane, integral component of membrane, ion transport, ion transmembrane transport, ionotropic glutamate receptor activity, ligand-gated ion channel activity, plasma membrane, signaling receptor activity
Prupe.5G094400	6.07583	5.43821e-13	1002	---NA---	GO:0005576, GO:0006952	extracellular region, defense response
Prupe.1G335600	-4.58196	5.71745e-13	4768	cyclin-SDS	GO:0007049, GO:0051301, GO:0005634, GO:0005737, GO:0000079, GO:0000307, GO:0016538, GO:0044772	cell cycle, cell division, nucleus, cytoplasm, regulation of cyclin-dependent protein serine/threonine kinase activity, cyclin-dependent protein kinase holoenzyme complex, cyclin-dependent protein serine/threonine kinase regulator activity, mitotic cell cycle phase transition
Prupe.3G012600	5.46977	5.71986e-13	1895	---NA---	#N/A	#N/A
Prupe.7G138900	3.34022	6.39738e-13	3565	probable disease resistance protein At5g66900	GO:0043531	ADP binding
Prupe.6G007500	4.4117	6.72685e-13	1970	uncharacterized LOC18775373	GO:0046872, GO:0030001	metal ion binding, metal ion transport
Prupe.1G216000	2.25679	6.96221e-13	7287	histone-lysine N-methyltransferase, H3 lysine-9 specific SUVH4	GO:0005634, GO:0016740, GO:0008270, GO:0008168, GO:0032259, GO:0018024, GO:0034968, GO:0016571, GO:0005694, GO:0005515	nucleus, transferase activity, zinc ion binding, methyltransferase activity, methylation, histone-lysine N-methyltransferase activity, histone lysine methylation, histone methylation, chromosome, protein binding
Prupe.4G155100	2.38195	7.09962e-13	3174	protein SRG1	GO:0055114, GO:0016491, GO:0046872	oxidation-reduction process, oxidoreductase activity, metal ion binding
Prupe.2G041200	3.11738	7.20271e-13	997	uncharacterized LOC18785888	GO:0051091	positive regulation of DNA-binding transcription factor activity
Prupe.1G164900	-2.39111	7.37446e-13	5635	Werner Syndrome-like exonuclease	GO:0003676, GO:0006139, GO:0090305, GO:0008408, GO:0005634, GO:0005737	nucleic acid binding, nucleobase-containing compound metabolic process, nucleic acid phosphodiester bond hydrolysis, 3'-5' exonuclease activity, nucleus, cytoplasm
Prupe.3G041000	9.30988	7.37446e-13	4151	disease resistance protein RPP13	GO:0043531	ADP binding
Prupe.1G465700	3.94603	7.67243e-13	710	---NA---	#N/A	#N/A
Prupe.1G515700	4.85328	7.72427e-13	3332	MDIS1-interacting receptor like kinase 2	GO:0005524, GO:0004672, GO:0006468	ATP binding, protein kinase activity, protein phosphorylation
Prupe.4G120300	4.20322	7.72883e-13	5670	---NA---	#N/A	#N/A
Prupe.6G018400	-3.02549	8.48822e-13	3941	FT-interacting protein 1	GO:0016020, GO:0016021	membrane, integral component of membrane
Prupe.3G256000	-9.17629	8.64334e-13	2000	UDP-glycosyltransferase 83A1	GO:0016740, GO:0016758, GO:0008194, GO:0043231	transferase activity, transferase activity, transferring hexosyl groups, UDP-glycosyltransferase activity, intracellular membrane-bounded organelle
Prupe.8G054600	8.4398	8.74081e-13	1559	---NA---	#N/A	#N/A
Prupe.8G042700	10.3292	9.2747e-13	3259	---NA---	GO:0008380, GO:0005634, GO:0005737, GO:0003723, GO:0003676, GO:0090502, GO:0006396, GO:0003729, GO:0004523, GO:0006397	RNA splicing, nucleus, cytoplasm, RNA binding, nucleic acid binding, RNA phosphodiester bond hydrolysis, endonucleolytic, RNA processing, mRNA binding, RNA-DNA hybrid ribonuclease activity, mRNA processing
Prupe.1G291800	3.29295	9.84725e-13	2333	---NA---	GO:0055114, GO:0016491, GO:0016020, GO:0016021, GO:0046872, GO:0004497, GO:0005506, GO:0016705, GO:0020037	oxidation-reduction process, oxidoreductase activity, membrane, integral component of membrane, metal ion binding, monooxygenase activity, iron ion binding, oxidoreductase activity, acting on paired donors, with incorporation or reduction of molecular oxygen, heme binding
Prupe.2G296000	-3.71201	1.20336e-12	4422	pectin acetylesterase 9	GO:0016787, GO:0071555, GO:0005576, GO:0005618, GO:0009505, GO:0052793	hydrolase activity, cell wall organization, extracellular region, cell wall, plant-type cell wall, pectin acetylesterase activity
Prupe.5G029800	-3.73631	1.32676e-12	1550	uncharacterized LOC18776478	#N/A	#N/A
Prupe.7G058900	-2.87811	1.35646e-12	2011	uncharacterized LOC18770060	GO:0016020, GO:0016021	membrane, integral component of membrane
Prupe.7G050900	6.06555	1.39347e-12	1385	thaumatin-like protein 2	GO:0005576, GO:0006952	extracellular region, defense response
Prupe.6G030400	6.06315	1.4198e-12	646	heavy metal-associated isoprenylated plant protein 41	GO:0046872, GO:0030001	metal ion binding, metal ion transport
Prupe.1G476500	-6.57673	1.48119e-12	1833	---NA---	GO:0016020, GO:0016021	membrane, integral component of membrane
Prupe.I000700	2.86858	1.49113e-12	5771	ABC transporter C family member 3	GO:0005524, GO:0042626, GO:0016021, GO:0055085, GO:0000166, GO:0016020, GO:0016887, GO:0000325, GO:0005774	ATP binding, ATPase-coupled transmembrane transporter activity, integral component of membrane, transmembrane transport, nucleotide binding, membrane, ATPase activity, plant-type vacuole, vacuolar membrane
Prupe.1G023600	3.22432	1.53486e-12	2811	---NA---	GO:0005509	calcium ion binding
Prupe.4G162700	3.63932	1.59846e-12	2371	receptor-like protein 2	GO:0016020, GO:0016021, GO:0005515	membrane, integral component of membrane, protein binding
Prupe.4G128900	4.38809	1.65847e-12	1024	---NA---	#N/A	#N/A
Prupe.8G210300	5.46759	1.70685e-12	1236	probable glutathione S-transferase	GO:0006749, GO:0005737, GO:0004364, GO:0005515	glutathione metabolic process, cytoplasm, glutathione transferase activity, protein binding
Prupe.2G234300	-2.77986	1.98761e-12	2048	---NA---	GO:0000166, GO:0005524, GO:0005737, GO:0051082, GO:0016887, GO:0031072, GO:0044183, GO:0051787, GO:0034620, GO:0042026, GO:0051085	nucleotide binding, ATP binding, cytoplasm, unfolded protein binding, ATPase activity, heat shock protein binding, protein folding chaperone, misfolded protein binding, cellular response to unfolded protein, protein refolding, chaperone cofactor-dependent protein refolding
Prupe.4G276400	3.46772	2.01348e-12	4922	amino-acid permease BAT1 homolog	GO:0055085, GO:0016020, GO:0016021, GO:0022857, GO:0006865	transmembrane transport, membrane, integral component of membrane, transmembrane transporter activity, amino acid transport
Prupe.8G256700	-3.90916	2.02479e-12	1022	universal stress protein A-like protein	#N/A	#N/A
Prupe.8G097700	-5.18437	2.05581e-12	946	---NA---	#N/A	#N/A
Prupe.8G097800	-2.2656	2.05581e-12	2858	cyclic nucleotide-gated ion channel 1	GO:0055085, GO:0016020, GO:0016021, GO:0005216, GO:0006811, GO:0034220	transmembrane transport, membrane, integral component of membrane, ion channel activity, ion transport, ion transmembrane transport
Prupe.7G119100	-4.41807	2.10535e-12	5135	glucomannan 4-beta-mannosyltransferase 9	GO:0016020, GO:0016021, GO:0097502, GO:0005794, GO:0016757, GO:0051753	membrane, integral component of membrane, mannosylation, Golgi apparatus, transferase activity, transferring glycosyl groups, mannan synthase activity
Prupe.1G316200	-2.89803	2.2532e-12	2909	putative glutamine amidotransferase-like protein RP404	GO:0016787, GO:0006541	hydrolase activity, glutamine metabolic process
Prupe.6G217800	8.3285	2.2532e-12	4681	ACT domain-containing protein ACR1	#N/A	#N/A
Prupe.6G199700	2.18519	2.2801e-12	3323	---NA---	GO:0043531, GO:0006952, GO:0005515	ADP binding, defense response, protein binding
Prupe.1G274100	-2.42131	2.31329e-12	2754	---NA---	GO:0016021, GO:0016811, GO:0006672	integral component of membrane, hydrolase activity, acting on carbon-nitrogen (but not peptide) bonds, in linear amides, ceramide metabolic process
Prupe.8G135700	-8.2213	2.38525e-12	2079	putative UDP-glucose glucosyltransferase	GO:0016740, GO:0016757, GO:0016758, GO:0008194, GO:0080043, GO:0080044	transferase activity, transferase activity, transferring glycosyl groups, transferase activity, transferring hexosyl groups, UDP-glycosyltransferase activity, quercetin 3-O-glucosyltransferase activity, quercetin 7-O-glucosyltransferase activity
Prupe.1G369700	-6.19196	2.40879e-12	1640	aldehyde oxidase GLOX1	#N/A	#N/A
Prupe.1G393000	3.25871	2.41366e-12	2011	WRKY transcription factor 18	GO:0005634, GO:0003677, GO:0006355, GO:0003700, GO:0043565	nucleus, DNA binding, regulation of transcription, DNA-templated, DNA-binding transcription factor activity, sequence-specific DNA binding
Prupe.3G040800	9.35997	2.42119e-12	6176	putative inactive disease susceptibility protein LOV1	GO:0043531	ADP binding
Prupe.3G108000	-4.3284	2.56069e-12	3109	protein trichome birefringence-like 43	, GO:0016413, GO:0005794	, O-acetyltransferase activity, Golgi apparatus
Prupe.6G298900	3.00497	2.59783e-12	623	calcium-binding allergen Bet v 3	GO:0005509	calcium ion binding
Prupe.8G195300	-3.67789	2.62097e-12	3329	putative quinone-oxidoreductase homolog, chloroplastic	GO:0055114, GO:0016491	oxidation-reduction process, oxidoreductase activity
Prupe.6G265900	6.95531	2.73215e-12	2318	7-deoxyloganetic acid glucosyltransferase	GO:0016740, GO:0016757, GO:0016758, GO:0008194	transferase activity, transferase activity, transferring glycosyl groups, transferase activity, transferring hexosyl groups, UDP-glycosyltransferase activity
Prupe.3G162900	2.67338	2.74403e-12	1813	protein C2-DOMAIN ABA-RELATED 4	#N/A	#N/A
Prupe.2G227200	-3.97329	3.02321e-12	1664	uncharacterized LOC18784986	GO:0032502	developmental process
Prupe.8G186400	3.69305	3.04367e-12	1373	probably inactive leucine-rich repeat receptor-like protein kinase At5g48380	#N/A	#N/A
Prupe.7G267500	-3.45221	3.22538e-12	3713	formin-like protein 2	GO:0016020, GO:0016021	membrane, integral component of membrane
Prupe.1G138000	4.33696	3.59801e-12	878	protein SRC2	#N/A	#N/A
Prupe.8G066400	3.4758	3.62536e-12	3108	RING-H2 finger protein ATL54	GO:0016020, GO:0016021, GO:0008270, GO:0016567	membrane, integral component of membrane, zinc ion binding, protein ubiquitination
Prupe.2G113600	-4.83894	3.64067e-12	4183	protein ECERIFERUM 1	GO:0016491, GO:0055114, GO:0016020, GO:0016021, GO:0005506, GO:0008610, GO:0005789, GO:0016126, GO:0000254	oxidoreductase activity, oxidation-reduction process, membrane, integral component of membrane, iron ion binding, lipid biosynthetic process, endoplasmic reticulum membrane, sterol biosynthetic process, C-4 methylsterol oxidase activity
Prupe.8G026500	-3.25215	3.76863e-12	5800	TMV resistance protein N	GO:0007165, GO:0016787, GO:0043531, GO:0006952, GO:0005515, GO:0050135, GO:0061809	signal transduction, hydrolase activity, ADP binding, defense response, protein binding, NAD(P)+ nucleosidase activity, NAD+ nucleotidase, cyclic ADP-ribose generating
Prupe.5G025300	6.63911	3.94722e-12	3880	disease resistance protein RPM1	GO:0043531, GO:0006952	ADP binding, defense response
Prupe.2G113200	-3.60896	4.00073e-12	2861	---NA---	GO:0007165, GO:0016787, GO:0016020, GO:0016021, GO:0043531, GO:0006952, GO:0005515, GO:0050135, GO:0061809	signal transduction, hydrolase activity, membrane, integral component of membrane, ADP binding, defense response, protein binding, NAD(P)+ nucleosidase activity, NAD+ nucleotidase, cyclic ADP-ribose generating
Prupe.6G142700	-2.70018	4.13763e-12	6614	serine/threonine-protein kinase Nek5	GO:0005524, GO:0004672, GO:0006468, GO:0000166, GO:0016301, GO:0016310, GO:0016740, GO:0004674, GO:0007017, GO:0055028	ATP binding, protein kinase activity, protein phosphorylation, nucleotide binding, kinase activity, phosphorylation, transferase activity, protein serine/threonine kinase activity, microtubule-based process, cortical microtubule
Prupe.7G209800	-3.86259	4.13763e-12	2751	probable polyamine oxidase 5	GO:0016491, GO:0055114, GO:0046592, GO:0050660, GO:0052894, GO:0052901, GO:0052903, GO:0046208, GO:1903602, GO:0005737	oxidoreductase activity, oxidation-reduction process, polyamine oxidase activity, flavin adenine dinucleotide binding, norspermine:oxygen oxidoreductase activity, spermine:oxygen oxidoreductase (spermidine-forming) activity, N1-acetylspermine:oxygen oxidoreductase (3-acetamidopropanal-forming) activity, spermine catabolic process, thermospermine catabolic process, cytoplasm
Prupe.2G267300	-2.22006	4.417e-12	1274	formin-like protein 2	#N/A	#N/A
Prupe.1G525800	2.97882	4.51482e-12	1835	purine permease 3	GO:0016020, GO:0016021, GO:0005215, GO:0015211, GO:0015860	membrane, integral component of membrane, transporter activity, purine nucleoside transmembrane transporter activity, purine nucleoside transmembrane transport
Prupe.8G058500	5.50642	4.51482e-12	1406	---NA---	#N/A	#N/A
Prupe.1G496600	-2.98594	4.51815e-12	2772	uncharacterized LOC18793727	GO:0005515	protein binding
Prupe.8G162100	-4.59567	4.62741e-12	1747	dirigent protein 23	GO:0005576, GO:0048046	extracellular region, apoplast
Prupe.2G103400	2.34471	4.77745e-12	2536	rust resistance kinase Lr10-like	GO:0005524, GO:0000166, GO:0016301, GO:0016310, GO:0016020, GO:0016021, GO:0016740, GO:0004672, GO:0006468, GO:0030247	ATP binding, nucleotide binding, kinase activity, phosphorylation, membrane, integral component of membrane, transferase activity, protein kinase activity, protein phosphorylation, polysaccharide binding
Prupe.6G352800	2.54968	5.14e-12	3267	U-box domain-containing protein 35-like	GO:0005524, GO:0000166, GO:0016301, GO:0016310, GO:0016740, GO:0004672, GO:0006468, GO:0030247	ATP binding, nucleotide binding, kinase activity, phosphorylation, transferase activity, protein kinase activity, protein phosphorylation, polysaccharide binding
Prupe.5G059500	-7.61918	5.27279e-12	1354	---NA---	GO:0003723, GO:0003735, GO:0006412, GO:0005840, GO:0022627, GO:0015935	RNA binding, structural constituent of ribosome, translation, ribosome, cytosolic small ribosomal subunit, small ribosomal subunit
Prupe.6G155100	-2.60538	5.48104e-12	5288	L-ascorbate oxidase	GO:0055114, GO:0016491, GO:0046872, GO:0005576, GO:0005507, GO:0008447, GO:0009506	oxidation-reduction process, oxidoreductase activity, metal ion binding, extracellular region, copper ion binding, L-ascorbate oxidase activity, plasmodesma
Prupe.7G114000	-2.61937	5.50318e-12	3329	GDSL esterase/lipase At5g03610	GO:0016788	hydrolase activity, acting on ester bonds
Prupe.1G294300	-2.66683	5.81731e-12	6897	---NA---	#N/A	#N/A
Prupe.6G321200	-4.77859	5.98283e-12	727	rapid alkalinization factor	GO:0005576, GO:0009506, GO:0019722	extracellular region, plasmodesma, calcium-mediated signaling
Prupe.7G264200	-3.32451	6.23749e-12	4630	serine carboxypeptidase 24	GO:0016787, GO:0008233, GO:0006508, GO:0005576, GO:0004185, GO:0004180, GO:0005615, GO:0009742	hydrolase activity, peptidase activity, proteolysis, extracellular region, serine-type carboxypeptidase activity, carboxypeptidase activity, extracellular space, brassinosteroid mediated signaling pathway
Prupe.6G263000	2.72782	6.76028e-12	2608	putative receptor protein kinase ZmPK1	GO:0005524, GO:0000166, GO:0016301, GO:0016310, GO:0016020, GO:0016021, GO:0016740, GO:0004672, GO:0006468, GO:0004674, GO:0048544, GO:0106310, GO:0106311	ATP binding, nucleotide binding, kinase activity, phosphorylation, membrane, integral component of membrane, transferase activity, protein kinase activity, protein phosphorylation, protein serine/threonine kinase activity, recognition of pollen, ,
Prupe.6G030000	-8.79091	7.59166e-12	1260	---NA---	#N/A	#N/A
Prupe.1G381900	2.65314	7.79114e-12	2658	cytochrome P450 734A1	GO:0055114, GO:0016491, GO:0046872, GO:0004497, GO:0005506, GO:0016705, GO:0020037	oxidation-reduction process, oxidoreductase activity, metal ion binding, monooxygenase activity, iron ion binding, oxidoreductase activity, acting on paired donors, with incorporation or reduction of molecular oxygen, heme binding
Prupe.6G021100	-4.32549	8.0518e-12	753	histone H3.2	GO:0005634, GO:0046982, GO:0003677, GO:0000786	nucleus, protein heterodimerization activity, DNA binding, nucleosome
Prupe.4G282500	9.13592	9.17197e-12	7020	uncharacterized LOC18780600	GO:0016020, GO:0016021, GO:0005515	membrane, integral component of membrane, protein binding
Prupe.4G186400	-8.92862	9.21413e-12	3881	---NA---	GO:0005975, GO:0016787, GO:0004553, GO:0008422	carbohydrate metabolic process, hydrolase activity, hydrolase activity, hydrolyzing O-glycosyl compounds, beta-glucosidase activity
Prupe.3G032200	-2.1774	9.54241e-12	3053	subtilisin-like protease SBT1.5	GO:0016787, GO:0008233, GO:0006508, GO:0004252, GO:0008236, GO:0016020, GO:0016485	hydrolase activity, peptidase activity, proteolysis, serine-type endopeptidase activity, serine-type peptidase activity, membrane, protein processing
Prupe.6G149000	-2.3646	1.02998e-11	9929	kinesin-like protein KIN-12E	GO:0005524, GO:0000166, GO:0003774, GO:0003777, GO:0008017, GO:0007018, GO:0016887, GO:0005871, GO:0005874	ATP binding, nucleotide binding, motor activity, microtubule motor activity, microtubule binding, microtubule-based movement, ATPase activity, kinesin complex, microtubule
Prupe.8G191900	-2.76476	1.04142e-11	2340	dCTP pyrophosphatase 1	GO:0000287, GO:0005829, GO:0005737, GO:0016787, GO:0046872, GO:0047429, GO:0009143, GO:0047840, GO:0006253, GO:0042262	magnesium ion binding, cytosol, cytoplasm, hydrolase activity, metal ion binding, nucleoside-triphosphate diphosphatase activity, nucleoside triphosphate catabolic process, dCTP diphosphatase activity, dCTP catabolic process, DNA protection
Prupe.3G194000	2.17143	1.04796e-11	2087	probable cinnamyl alcohol dehydrogenase 1	GO:0055114, GO:0016491, GO:0046872, GO:0008270, GO:0016616	oxidation-reduction process, oxidoreductase activity, metal ion binding, zinc ion binding, oxidoreductase activity, acting on the CH-OH group of donors, NAD or NADP as acceptor
Prupe.5G111300	3.50811	1.0845e-11	612	disease resistance response protein 206	GO:0005576, GO:0048046	extracellular region, apoplast
Prupe.5G119300	5.13821	1.09803e-11	1911	putative RING-H2 finger protein ATL69	GO:0016020, GO:0016021, GO:0030247	membrane, integral component of membrane, polysaccharide binding
Prupe.8G025300	9.59156	1.1081e-11	1675	uncharacterized protein At1g32220, chloroplastic	GO:0055114, GO:0003954, GO:1901006	oxidation-reduction process, NADH dehydrogenase activity, ubiquinone-6 biosynthetic process
Prupe.2G076700	-9.52142	1.15383e-11	2710	receptor-like protein 2	GO:0016020, GO:0016021, GO:0005515	membrane, integral component of membrane, protein binding
Prupe.2G093700	3.02969	1.17512e-11	3313	rust resistance kinase Lr10	GO:0005524, GO:0000166, GO:0016301, GO:0016310, GO:0016020, GO:0016021, GO:0016740, GO:0004672, GO:0006468, GO:0030247	ATP binding, nucleotide binding, kinase activity, phosphorylation, membrane, integral component of membrane, transferase activity, protein kinase activity, protein phosphorylation, polysaccharide binding
Prupe.4G018000	-2.7847	1.17818e-11	2860	synaptonemal complex protein 1-like	GO:0005789, GO:0016021, GO:0006886, GO:0005783, GO:0015031, GO:0016192, GO:0006888, GO:0070973, GO:0016020	endoplasmic reticulum membrane, integral component of membrane, intracellular protein transport, endoplasmic reticulum, protein transport, vesicle-mediated transport, endoplasmic reticulum to Golgi vesicle-mediated transport, protein localization to endoplasmic reticulum exit site, membrane
Prupe.4G148800	-5.26862	1.17818e-11	3505	interactor of constitutive active ROPs 1	#N/A	#N/A
Prupe.1G142300	-9.07207	1.23902e-11	4607	---NA---	GO:0016020, GO:0016021	membrane, integral component of membrane
Prupe.6G117200	8.98992	1.24925e-11	1538	---NA---	GO:0005515	protein binding
Prupe.6G249000	2.37943	1.25145e-11	5769	F-box protein At2g39490	GO:0005515	protein binding
Prupe.5G018100	3.55824	1.2827e-11	3650	methanol O-anthraniloyltransferase	GO:0016747	transferase activity, transferring acyl groups other than amino-acyl groups
Prupe.2G038800	-7.01165	1.34373e-11	2749	aspartyl protease AED3	GO:0004190, GO:0006508	aspartic-type endopeptidase activity, proteolysis
Prupe.2G213000	-2.91647	1.59979e-11	3447	auxin response factor 18	GO:0005634, GO:0003677, GO:0006355, GO:0009734, GO:0009725, GO:0006351, GO:0005515	nucleus, DNA binding, regulation of transcription, DNA-templated, auxin-activated signaling pathway, response to hormone, transcription, DNA-templated, protein binding
Prupe.3G012200	2.39453	1.59979e-11	2446	protein DJ-1 homolog D-like	#N/A	#N/A
Prupe.3G144000	7.29677	1.75448e-11	1213	thaumatin-like protein 1	GO:0005576, GO:0006952	extracellular region, defense response
Prupe.2G247900	-2.61509	1.76623e-11	3020	uncharacterized LOC18784564	GO:0034968, GO:0018024,	histone lysine methylation, histone-lysine N-methyltransferase activity,
Prupe.3G154300	-7.61369	1.76623e-11	1889	---NA---	GO:0016020, GO:0016021	membrane, integral component of membrane
Prupe.6G008300	2.28564	1.76623e-11	2164	UDP-glucose iridoid glucosyltransferase	GO:0016740, GO:0016758, GO:0008194, GO:0080043, GO:0080044	transferase activity, transferase activity, transferring hexosyl groups, UDP-glycosyltransferase activity, quercetin 3-O-glucosyltransferase activity, quercetin 7-O-glucosyltransferase activity
Prupe.5G033600	2.28972	1.78706e-11	2031	---NA---	GO:0005634, GO:0005783, GO:0000209, GO:0061631	nucleus, endoplasmic reticulum, protein polyubiquitination, ubiquitin conjugating enzyme activity
Prupe.2G139900	-2.44767	1.80775e-11	4256	---NA---	GO:0016020, GO:0016021, GO:0005789, GO:0005886, GO:0061817, GO:0090158	membrane, integral component of membrane, endoplasmic reticulum membrane, plasma membrane, endoplasmic reticulum-plasma membrane tethering, endoplasmic reticulum membrane organization
Prupe.1G248600	-2.81008	1.83442e-11	4388	uncharacterized LOC18788852	#N/A	#N/A
Prupe.1G524800	-2.78017	1.83442e-11	2272	protein DETOXIFICATION 27	GO:0055085, GO:0016020, GO:0016021, GO:0015297, GO:0015238, GO:0042910, GO:0042908, GO:0022857	transmembrane transport, membrane, integral component of membrane, antiporter activity, GO_0015238, xenobiotic transmembrane transporter activity, xenobiotic transport, transmembrane transporter activity
Prupe.6G186000	-6.77856	1.96291e-11	1888	probable xyloglucan galactosyltransferase GT17	GO:0005794, GO:0016020, GO:0016021, GO:0016757, GO:0006486, GO:0000139	Golgi apparatus, membrane, integral component of membrane, transferase activity, transferring glycosyl groups, protein glycosylation, Golgi membrane
Prupe.8G054900	9.26763	1.96291e-11	1372	---NA---	#N/A	#N/A
Prupe.5G093900	3.39277	2.0704e-11	1188	protein P21	GO:0005576, GO:0006952	extracellular region, defense response
Prupe.1G331000	-8.52382	2.07153e-11	4845	endoglucanase 8	GO:0005975, GO:0016787, GO:0016798, GO:0008152, GO:0004553, GO:0008810, GO:0000272, GO:0030245	carbohydrate metabolic process, hydrolase activity, hydrolase activity, acting on glycosyl bonds, metabolic process, hydrolase activity, hydrolyzing O-glycosyl compounds, cellulase activity, polysaccharide catabolic process, cellulose catabolic process
Prupe.2G128800	-8.45067	2.45016e-11	6345	plasma membrane ATPase 1	GO:0005886, GO:0000166, GO:0005524, GO:0016020, GO:0016021, GO:0006811, GO:0008553, GO:0120029, GO:0046872, GO:0016887, GO:0051453, GO:1902600	plasma membrane, nucleotide binding, ATP binding, membrane, integral component of membrane, ion transport, proton-exporting ATPase activity, phosphorylative mechanism, proton export across plasma membrane, metal ion binding, ATPase activity, regulation of intracellular pH, proton transmembrane transport
Prupe.I002300	-3.00391	2.54286e-11	3717	TMV resistance protein N	GO:0007165, GO:0043531, GO:0016787, GO:0006952, GO:0005515, GO:0050135, GO:0061809	signal transduction, ADP binding, hydrolase activity, defense response, protein binding, NAD(P)+ nucleosidase activity, NAD+ nucleotidase, cyclic ADP-ribose generating
Prupe.4G255100	-3.77737	2.73385e-11	3744	zinc finger CCCH domain-containing protein 22	GO:0003677, GO:0003676, GO:0046872, GO:0003723	DNA binding, nucleic acid binding, metal ion binding, RNA binding
Prupe.1G328200	13.4487	2.75263e-11	1197	MLP-like protein 328	GO:0006952, GO:0009607	defense response, response to biotic stimulus
Prupe.5G010900	2.7181	2.88513e-11	4099	probable serine/threonine-protein kinase PIX13	GO:0005524, GO:0000166, GO:0016301, GO:0016310, GO:0016740, GO:0004672, GO:0006468, GO:0004674	ATP binding, nucleotide binding, kinase activity, phosphorylation, transferase activity, protein kinase activity, protein phosphorylation, protein serine/threonine kinase activity
Prupe.3G042800	-8.61325	2.93044e-11	4931	---NA---	GO:0003723, GO:0005840, GO:0003735, GO:0006412, GO:0005634, GO:0022627	RNA binding, ribosome, structural constituent of ribosome, translation, nucleus, cytosolic small ribosomal subunit
Prupe.6G218000	4.43674	3.03658e-11	580	---NA---	#N/A	#N/A
Prupe.4G282100	-3.94168	3.04803e-11	3191	---NA---	GO:0016787, GO:0004040	hydrolase activity, amidase activity
Prupe.5G012100	-8.50775	3.23126e-11	2970	---NA---	#N/A	#N/A
Prupe.4G198700	-11.7513	3.38983e-11	2072	---NA---	GO:0046872, GO:0000287, GO:0010333, GO:0016829	metal ion binding, magnesium ion binding, terpene synthase activity, lyase activity
Prupe.2G148600	-2.26414	3.55174e-11	2946	cytochrome P450 704C1	GO:0055114, GO:0016491, GO:0016020, GO:0016021, GO:0046872, GO:0004497, GO:0005506, GO:0016705, GO:0020037	oxidation-reduction process, oxidoreductase activity, membrane, integral component of membrane, metal ion binding, monooxygenase activity, iron ion binding, oxidoreductase activity, acting on paired donors, with incorporation or reduction of molecular oxygen, heme binding
Prupe.1G203300	6.47273	3.64444e-11	693	---NA---	GO:0006952	defense response
Prupe.5G213200	-8.48591	3.68436e-11	1201	---NA---	#N/A	#N/A
Prupe.1G537700	-6.41605	3.78564e-11	2370	cytochrome P450 CYP82D47	GO:0055114, GO:0016491, GO:0046872, GO:0004497, GO:0005506, GO:0016705, GO:0020037, GO:0098542	oxidation-reduction process, oxidoreductase activity, metal ion binding, monooxygenase activity, iron ion binding, oxidoreductase activity, acting on paired donors, with incorporation or reduction of molecular oxygen, heme binding, defense response to other organism
Prupe.8G248700	-3.93086	3.78564e-11	4428	sugar transporter ERD6-like 7	GO:0055085, GO:0016020, GO:0016021, GO:0022857	transmembrane transport, membrane, integral component of membrane, transmembrane transporter activity
Prupe.6G074900	-4.21124	3.91533e-11	5463	probable LRR receptor-like serine/threonine-protein kinase At3g47570	GO:0005524, GO:0000166, GO:0016301, GO:0016310, GO:0016020, GO:0016021, GO:0016740, GO:0004672, GO:0006468, GO:0004674, GO:0005515	ATP binding, nucleotide binding, kinase activity, phosphorylation, membrane, integral component of membrane, transferase activity, protein kinase activity, protein phosphorylation, protein serine/threonine kinase activity, protein binding
Prupe.7G245200	-2.18363	4.48066e-11	3452	axial regulator YABBY 5	GO:0007275, GO:0005634, GO:0010158, GO:0045165, GO:0000976, GO:0009944, GO:1902183, GO:2000024	multicellular organism development, nucleus, abaxial cell fate specification, cell fate commitment, transcription regulatory region sequence-specific DNA binding, polarity specification of adaxial/abaxial axis, regulation of shoot apical meristem development, regulation of leaf development
Prupe.1G171200	-7.23673	4.60705e-11	1806	berberine bridge enzyme-like 8	GO:0016491, GO:0055114, GO:0050660, GO:0071949	oxidoreductase activity, oxidation-reduction process, flavin adenine dinucleotide binding, FAD binding
Prupe.7G218900	2.30364	4.62795e-11	3465	---NA---	GO:0005524, GO:0000166, GO:0016301, GO:0016310, GO:0016020, GO:0016021, GO:0016740, GO:0004672, GO:0006468, GO:0004674, GO:0005515	ATP binding, nucleotide binding, kinase activity, phosphorylation, membrane, integral component of membrane, transferase activity, protein kinase activity, protein phosphorylation, protein serine/threonine kinase activity, protein binding
Prupe.1G458800	-8.86547	4.6967e-11	1199	---NA---	GO:0016491, GO:0055114, GO:0008115	oxidoreductase activity, oxidation-reduction process, sarcosine oxidase activity
Prupe.6G092200	-2.33834	4.70914e-11	8271	uncharacterized LOC18773901	#N/A	#N/A
Prupe.7G128800	2.97027	4.71851e-11	3331	transcription factor RAX2	GO:0005634, GO:0003677	nucleus, DNA binding
Prupe.6G152900	2.77939	4.75439e-11	2531	GDSL esterase/lipase At1g71250	GO:0016788	hydrolase activity, acting on ester bonds
Prupe.3G061800	8.32085	5.03838e-11	2715	ankyrin repeat-containing protein At2g01680	GO:0016020, GO:0016021, GO:0005515	membrane, integral component of membrane, protein binding
Prupe.8G215100	4.05447	5.14011e-11	3748	bifunctional TH2 protein, mitochondrial	, GO:0016020, GO:0016021, GO:0005829	, membrane, integral component of membrane, cytosol
Prupe.1G116700	2.61511	5.35546e-11	1802	---NA---	#N/A	#N/A
Prupe.4G153100	-5.15266	5.56746e-11	3030	---NA---	GO:0055114, GO:0005506, GO:0016705, GO:0020037, GO:0004497	oxidation-reduction process, iron ion binding, oxidoreductase activity, acting on paired donors, with incorporation or reduction of molecular oxygen, heme binding, monooxygenase activity
Prupe.1G377300	-3.54896	5.85337e-11	1854	isoflavone reductase-like protein	GO:0055114, GO:0016491	oxidation-reduction process, oxidoreductase activity
Prupe.2G293900	-3.60929	5.90623e-11	1765	remorin	#N/A	#N/A
Prupe.3G092600	-2.0012	6.07652e-11	2038	prostatic spermine-binding protein-like	#N/A	#N/A
Prupe.6G115200	-10.0637	6.20942e-11	4356	lysosomal Pro-X carboxypeptidase	GO:0016787, GO:0006508, GO:0008236, GO:0008239	hydrolase activity, proteolysis, serine-type peptidase activity, dipeptidyl-peptidase activity
Prupe.3G188500	4.54968	6.56201e-11	1862	7-deoxyloganetin glucosyltransferase-like	GO:0016740, GO:0016757, GO:0016758, GO:0008194, GO:0080043, GO:0080044	transferase activity, transferase activity, transferring glycosyl groups, transferase activity, transferring hexosyl groups, UDP-glycosyltransferase activity, quercetin 3-O-glucosyltransferase activity, quercetin 7-O-glucosyltransferase activity
Prupe.8G022000	-3.31086	6.90447e-11	3992	LRR receptor-like serine/threonine-protein kinase RCH1	GO:0005524, GO:0000166, GO:0016301, GO:0016310, GO:0016020, GO:0016021, GO:0016740, GO:0004672, GO:0006468, GO:0004674, GO:0005886, GO:0005515	ATP binding, nucleotide binding, kinase activity, phosphorylation, membrane, integral component of membrane, transferase activity, protein kinase activity, protein phosphorylation, protein serine/threonine kinase activity, plasma membrane, protein binding
Prupe.4G262900	8.61991	7.12977e-11	2488	probable inactive 2-oxoglutarate-dependent dioxygenase AOP2	GO:0055114, GO:0016491, GO:0046872, GO:0051213	oxidation-reduction process, oxidoreductase activity, metal ion binding, dioxygenase activity
Prupe.1G438300	2.03648	7.27336e-11	2759	origin of replication complex subunit 2	GO:0005634, GO:0006260, GO:0000808, GO:0003688, GO:0005664	nucleus, DNA replication, origin recognition complex, DNA replication origin binding, nuclear origin of replication recognition complex
Prupe.3G060500	-9.51343	8.47812e-11	1049	uncharacterized LOC18783655	#N/A	#N/A
Prupe.6G114400	-2.2579	8.51409e-11	1114	---NA---	GO:0032875, GO:0005634, GO:0045839	regulation of DNA endoreduplication, nucleus, negative regulation of mitotic nuclear division
Prupe.3G266000	2.90374	8.57224e-11	2493	probable calcium-binding protein CML45	GO:0005509	calcium ion binding
Prupe.7G090800	3.07757	8.67908e-11	4159	calcium-dependent protein kinase 26	GO:0005524, GO:0000166, GO:0016301, GO:0016310, GO:0016740, GO:0005509, GO:0046872, GO:0004672, GO:0006468, GO:0005634, GO:0005737, GO:0046777, GO:0035556, GO:0018105, GO:0005516, GO:0009931, GO:0004683	ATP binding, nucleotide binding, kinase activity, phosphorylation, transferase activity, calcium ion binding, metal ion binding, protein kinase activity, protein phosphorylation, nucleus, cytoplasm, protein autophosphorylation, intracellular signal transduction, peptidyl-serine phosphorylation, calmodulin binding, calcium-dependent protein serine/threonine kinase activity, calmodulin-dependent pr…
Prupe.1G112500	-3.33617	8.73148e-11	818	---NA---	#N/A	#N/A
Prupe.6G228500	11.4338	9.03903e-11	1049	---NA---	#N/A	#N/A
Prupe.7G201900	-6.4172	9.26584e-11	2205	transcription factor MYB6	GO:0005634, GO:0003677, GO:0030154, GO:0000976	nucleus, DNA binding, cell differentiation, transcription regulatory region sequence-specific DNA binding
Prupe.1G371300	-3.66212	9.37765e-11	2972	---NA---	GO:0005634, GO:0046983, GO:0003677, GO:0006355, GO:0003700, GO:0000977, GO:0045944, GO:0006351, GO:0000981, GO:0000785, GO:0006357, GO:0000978	nucleus, protein dimerization activity, DNA binding, regulation of transcription, DNA-templated, DNA-binding transcription factor activity, RNA polymerase II transcription regulatory region sequence-specific DNA binding, positive regulation of transcription by RNA polymerase II, transcription, DNA-templated, DNA-binding transcription factor activity, RNA polymerase II-specific, chromatin, regulat…
Prupe.3G091300	3.63695	9.72142e-11	691	---NA---	#N/A	#N/A
Prupe.7G026800	4.09281	1.03582e-10	3782	uncharacterized LOC109950486	, GO:0006508, GO:0008234	, proteolysis, cysteine-type peptidase activity
Prupe.6G296300	-2.5951	1.05705e-10	4599	probable inactive receptor kinase At5g58300	GO:0005524, GO:0016020, GO:0016021, GO:0004672, GO:0006468, GO:0005515	ATP binding, membrane, integral component of membrane, protein kinase activity, protein phosphorylation, protein binding
Prupe.8G121400	2.18175	1.09289e-10	950	probable carboxylesterase 13	GO:0016787	hydrolase activity
Prupe.4G209200	-2.07102	1.16655e-10	2885	uncharacterized LOC18780062	#N/A	#N/A
Prupe.6G185600	4.33489	1.19083e-10	611	---NA---	GO:0016020, GO:0016021, GO:0005886	membrane, integral component of membrane, plasma membrane
Prupe.6G053300	-3.13614	1.19214e-10	3624	BAG family molecular chaperone regulator 4	GO:0051087, GO:0050790, GO:0005737, GO:0031072, GO:0050821, GO:0000774, GO:0005515	chaperone binding, regulation of catalytic activity, cytoplasm, heat shock protein binding, protein stabilization, adenyl-nucleotide exchange factor activity, protein binding
Prupe.3G112300	4.47189	1.27458e-10	1043	cucumber peeling cupredoxin	GO:0009055, GO:0022900, GO:0046658	electron transfer activity, electron transport chain, anchored component of plasma membrane
Prupe.1G579200	-2.72615	1.28069e-10	6224	leucine-rich repeat receptor-like serine/threonine-protein kinase BAM3	GO:0005524, GO:0016020, GO:0016021, GO:0004672, GO:0006468, GO:0005515, GO:0005886, GO:0009755	ATP binding, membrane, integral component of membrane, protein kinase activity, protein phosphorylation, protein binding, plasma membrane, hormone-mediated signaling pathway
Prupe.1G319200	2.4136	1.3232e-10	1793	E3 ubiquitin-protein ligase RHA2A	GO:0061630, GO:0016567	ubiquitin protein ligase activity, protein ubiquitination
Prupe.3G281000	-4.04925	1.39577e-10	2574	---NA---	GO:0016020, GO:0016021, GO:0022857, GO:0055085, GO:0005886	membrane, integral component of membrane, transmembrane transporter activity, transmembrane transport, plasma membrane
Prupe.6G296600	3.66097	1.39605e-10	2870	acid phosphatase 1	GO:0016311, GO:0003993, GO:0045735	dephosphorylation, acid phosphatase activity, nutrient reservoir activity
Prupe.8G037400	9.12277	1.40873e-10	4260	disease resistance protein RPP13	GO:0043531, GO:0005515	ADP binding, protein binding
Prupe.2G087200	5.04341	1.45655e-10	2463	rust resistance kinase Lr10-like	GO:0005524, GO:0000166, GO:0016301, GO:0016310, GO:0016740, GO:0004672, GO:0006468	ATP binding, nucleotide binding, kinase activity, phosphorylation, transferase activity, protein kinase activity, protein phosphorylation
Prupe.1G477600	2.96844	1.49175e-10	2798	UPF0481 protein At3g47200	GO:0016020, GO:0016021	membrane, integral component of membrane
Prupe.5G127100	-3.75514	1.4923e-10	5025	transcription factor bHLH157	GO:0005634, GO:0046983, GO:0006355, GO:0003700	nucleus, protein dimerization activity, regulation of transcription, DNA-templated, DNA-binding transcription factor activity
Prupe.4G149500	2.18136	1.53174e-10	1322	uncharacterized endoplasmic reticulum membrane protein YGL010W	GO:0016020, GO:0016021, GO:0046521	membrane, integral component of membrane, sphingoid catabolic process
Prupe.1G269800	-2.03095	1.58259e-10	4518	probable LRR receptor-like serine/threonine-protein kinase At1g14390	GO:0005524, GO:0016020, GO:0016021, GO:0004672, GO:0006468, GO:0005886, GO:0046777, GO:0009506, GO:0005515	ATP binding, membrane, integral component of membrane, protein kinase activity, protein phosphorylation, plasma membrane, protein autophosphorylation, plasmodesma, protein binding
Prupe.6G165400	2.89224	1.61833e-10	4016	G-type lectin S-receptor-like serine/threonine-protein kinase LECRK1	GO:0005524, GO:0000166, GO:0016301, GO:0016310, GO:0016020, GO:0016021, GO:0016740, GO:0004672, GO:0006468, GO:0004674, GO:0106310, GO:0106311	ATP binding, nucleotide binding, kinase activity, phosphorylation, membrane, integral component of membrane, transferase activity, protein kinase activity, protein phosphorylation, protein serine/threonine kinase activity, ,
Prupe.6G324100	5.34371	1.63769e-10	4220	probable linoleate 9S-lipoxygenase 5	GO:0005737, GO:0055114, GO:0016491, GO:0046872, GO:0016702, GO:0051213, GO:0006633, GO:0031408, GO:0006629, GO:0006631, GO:0034440, GO:0005515	cytoplasm, oxidation-reduction process, oxidoreductase activity, metal ion binding, oxidoreductase activity, acting on single donors with incorporation of molecular oxygen, incorporation of two atoms of oxygen, dioxygenase activity, fatty acid biosynthetic process, oxylipin biosynthetic process, lipid metabolic process, fatty acid metabolic process, lipid oxidation, protein binding
Prupe.6G163800	-4.65536	1.64449e-10	1570	---NA---	#N/A	#N/A
Prupe.1G458900	-2.52628	1.66013e-10	1795	probable sarcosine oxidase	GO:0016491, GO:0055114, GO:0008115, GO:0046653	oxidoreductase activity, oxidation-reduction process, sarcosine oxidase activity, tetrahydrofolate metabolic process
Prupe.2G063900	-3.16374	1.80057e-10	6057	probable inactive leucine-rich repeat receptor-like protein kinase At3g03770	GO:0005524, GO:0016020, GO:0016021, GO:0004672, GO:0006468, GO:0005886, GO:0046777, GO:0009506, GO:0005515	ATP binding, membrane, integral component of membrane, protein kinase activity, protein phosphorylation, plasma membrane, protein autophosphorylation, plasmodesma, protein binding
Prupe.1G441200	-2.796	1.98011e-10	4162	uncharacterized LOC18791272	#N/A	#N/A
Prupe.2G160500	-8.67481	1.99752e-10	1794	---NA---	GO:0055114, GO:0016020	oxidation-reduction process, membrane
Prupe.1G204000	8.14863	2.02296e-10	425	endochitinase EP3	GO:0006952, GO:0004568, GO:0008061, GO:0006032, GO:0016998	defense response, chitinase activity, chitin binding, chitin catabolic process, cell wall macromolecule catabolic process
Prupe.7G197100	-3.00631	2.20526e-10	2763	subtilisin-like protease SBT1.8	GO:0016787, GO:0008233, GO:0006508, GO:0004252, GO:0008236, GO:0005618, GO:0005794, GO:0009506	hydrolase activity, peptidase activity, proteolysis, serine-type endopeptidase activity, serine-type peptidase activity, cell wall, Golgi apparatus, plasmodesma
Prupe.5G242300	-2.72295	2.2053e-10	3654	kinase-interacting family protein	GO:0003779	actin binding
Prupe.6G211500	4.01971	2.26176e-10	2146	2-alkenal reductase (NADP(+)-dependent)	GO:0055114, GO:0016491, GO:0032440	oxidation-reduction process, oxidoreductase activity, 2-alkenal reductase [NAD(P)+] activity
Prupe.4G226100	3.61099	2.34167e-10	1010	---NA---	#N/A	#N/A
Prupe.5G224200	-2.54417	2.38323e-10	4763	kinesin-like protein NACK1	GO:0005524, GO:0000166, GO:0003774, GO:0003777, GO:0008017, GO:0007018, GO:0005874	ATP binding, nucleotide binding, motor activity, microtubule motor activity, microtubule binding, microtubule-based movement, microtubule
Prupe.8G217600	2.04196	2.49705e-10	2973	MDIS1-interacting receptor like kinase 2	GO:0005524, GO:0016020, GO:0016021, GO:0004672, GO:0006468, GO:0005886, GO:0009755, GO:0005515	ATP binding, membrane, integral component of membrane, protein kinase activity, protein phosphorylation, plasma membrane, hormone-mediated signaling pathway, protein binding
Prupe.3G163000	6.04727	2.733e-10	2318	---NA---	GO:0005634, GO:0003677	nucleus, DNA binding
Prupe.2G089000	2.20201	2.82734e-10	4010	rust resistance kinase Lr10	GO:0005524, GO:0000166, GO:0016301, GO:0016310, GO:0016020, GO:0016021, GO:0016740, GO:0004672, GO:0006468, GO:0030247	ATP binding, nucleotide binding, kinase activity, phosphorylation, membrane, integral component of membrane, transferase activity, protein kinase activity, protein phosphorylation, polysaccharide binding
Prupe.1G300100	4.09485	2.83154e-10	1614	uncharacterized LOC18788438	#N/A	#N/A
Prupe.1G170600	-3.87965	2.85368e-10	5638	---NA---	#N/A	#N/A
Prupe.2G251800	-8.33738	2.89575e-10	2298	omega-3 fatty acid desaturase, chloroplastic	GO:0006629	lipid metabolic process
Prupe.4G168700	4.64079	2.89657e-10	2448	receptor-like protein 2	GO:0016020, GO:0016021, GO:0005515	membrane, integral component of membrane, protein binding
Prupe.4G191200	-2.47129	2.93986e-10	5571	cyclic nucleotide-gated ion channel 4	GO:0055085, GO:0016020, GO:0016021, GO:0005216, GO:0006811, GO:0034220	transmembrane transport, membrane, integral component of membrane, ion channel activity, ion transport, ion transmembrane transport
Prupe.6G127500	-2.39952	2.95384e-10	2143	beta-1,6-galactosyltransferase GALT29A	GO:0005794, GO:0016020, GO:0016021, GO:0016757, GO:0006486, GO:0000139, GO:0008373, GO:0097503, GO:0008378	Golgi apparatus, membrane, integral component of membrane, transferase activity, transferring glycosyl groups, protein glycosylation, Golgi membrane, sialyltransferase activity, sialylation, galactosyltransferase activity
Prupe.1G564200	3.40423	3.02085e-10	3783	uncharacterized LOC109948743	#N/A	#N/A
Prupe.1G331500	-2.69958	3.08165e-10	3587	protein TIFY 6B	GO:0005634, GO:0009611, GO:0031347, GO:2000022,	nucleus, response to wounding, regulation of defense response, regulation of jasmonic acid mediated signaling pathway,
Prupe.8G192000	-6.64642	3.43944e-10	1394	EPIDERMAL PATTERNING FACTOR-like protein 9	GO:2000123	positive regulation of stomatal complex development
Prupe.1G509100	5.46489	3.48515e-10	5374	aminotransferase ALD1	GO:0003824, GO:0009058, GO:0008483, GO:0030170, GO:0016020, GO:0016021	catalytic activity, biosynthetic process, transaminase activity, pyridoxal phosphate binding, membrane, integral component of membrane
Prupe.3G135700	-3.19202	3.48676e-10	5175	---NA---	GO:0016020, GO:0016021, GO:0031347, GO:0071446, GO:2000031, GO:0005515	membrane, integral component of membrane, regulation of defense response, cellular response to salicylic acid stimulus, regulation of salicylic acid mediated signaling pathway, protein binding
Prupe.2G242100	-4.63891	3.51799e-10	3679	cucumisin	GO:0016787, GO:0008233, GO:0006508, GO:0004252, GO:0008236	hydrolase activity, peptidase activity, proteolysis, serine-type endopeptidase activity, serine-type peptidase activity
Prupe.3G236100	2.62353	3.65757e-10	3492	uncharacterized LOC18782520	GO:0015031, GO:0008104	protein transport, protein localization
Prupe.1G472600	-8.74886	3.8785e-10	5335	potassium channel AKT1	GO:0055085, GO:0016020, GO:0016021, GO:0005216, GO:0006811, GO:0034220, GO:0005249, GO:0006813, GO:0071805, GO:0034765, GO:0005515	transmembrane transport, membrane, integral component of membrane, ion channel activity, ion transport, ion transmembrane transport, voltage-gated potassium channel activity, potassium ion transport, potassium ion transmembrane transport, regulation of ion transmembrane transport, protein binding
Prupe.6G132700	8.45711	3.90084e-10	551	uncharacterized LOC18772899	GO:0009269	response to desiccation
Prupe.3G053200	-3.25123	4.13509e-10	5640	anoctamin-like protein At1g73020	GO:0016020, GO:0016021, GO:0005886, GO:0055085, GO:1902476, GO:0005254	membrane, integral component of membrane, plasma membrane, transmembrane transport, chloride transmembrane transport, chloride channel activity
Prupe.2G105700	3.68376	4.20149e-10	5578	glutamate receptor 1.4	GO:0005886, GO:0016020, GO:0016021, GO:0006811, GO:0034220, GO:0004970, GO:0035235, GO:0015276, GO:0038023, GO:0030054	plasma membrane, membrane, integral component of membrane, ion transport, ion transmembrane transport, ionotropic glutamate receptor activity, ionotropic glutamate receptor signaling pathway, ligand-gated ion channel activity, signaling receptor activity, cell junction
Prupe.1G093800	8.25704	4.42686e-10	3784	(R)-mandelonitrile lyase 1	GO:0055114, GO:0050660, GO:0016829, GO:0016614, GO:0046593	oxidation-reduction process, flavin adenine dinucleotide binding, lyase activity, oxidoreductase activity, acting on CH-OH group of donors, mandelonitrile lyase activity
Prupe.4G079800	-2.33412	4.86405e-10	4071	uncharacterized LOC18778247	GO:0005886	plasma membrane
Prupe.4G262700	-6.35316	5.16916e-10	735	cyclic nucleotide-gated ion channel 1-like	#N/A	#N/A
Prupe.2G288200	-2.11061	6.11522e-10	2039	uncharacterized LOC18784570	GO:0003824	catalytic activity
Prupe.6G261500	2.09209	6.11522e-10	2015	L-type lectin-domain containing receptor kinase IV.1	GO:0005886, GO:0005524, GO:0000166, GO:0016301, GO:0016310, GO:0016020, GO:0016021, GO:0016740, GO:0030246, GO:0004672, GO:0006468, GO:0007178, GO:0004675, GO:0002229, GO:0042742	plasma membrane, ATP binding, nucleotide binding, kinase activity, phosphorylation, membrane, integral component of membrane, transferase activity, carbohydrate binding, protein kinase activity, protein phosphorylation, transmembrane receptor protein serine/threonine kinase signaling pathway, transmembrane receptor protein serine/threonine kinase activity, defense response to oomycetes, defense r…
Prupe.2G232100	-9.29681	6.47816e-10	2232	---NA---	#N/A	#N/A
Prupe.3G135100	-9.21482	6.77431e-10	3568	protein ACCELERATED CELL DEATH 6	GO:0016020, GO:0016021, GO:0031347, GO:0071446, GO:2000031, GO:0005515	membrane, integral component of membrane, regulation of defense response, cellular response to salicylic acid stimulus, regulation of salicylic acid mediated signaling pathway, protein binding
Prupe.I001800	-2.53032	6.94493e-10	4872	TMV resistance protein N	GO:0007165, GO:0043531, GO:0006952, GO:0016787, GO:0005515, GO:0050135, GO:0061809	signal transduction, ADP binding, defense response, hydrolase activity, protein binding, NAD(P)+ nucleosidase activity, NAD+ nucleotidase, cyclic ADP-ribose generating
Prupe.8G037500	8.12202	7.22687e-10	668	---NA---	#N/A	#N/A
Prupe.2G063000	-3.78944	7.23342e-10	2366	---NA---	#N/A	#N/A
Prupe.4G281400	-2.54563	7.23498e-10	641	---NA---	#N/A	#N/A
Prupe.1G145600	-4.12598	7.32385e-10	3692	receptor-like cytosolic serine/threonine-protein kinase RBK2	GO:0005524, GO:0000166, GO:0016301, GO:0016310, GO:0016740, GO:0004672, GO:0006468, GO:0004674, GO:0005777, GO:0046777	ATP binding, nucleotide binding, kinase activity, phosphorylation, transferase activity, protein kinase activity, protein phosphorylation, protein serine/threonine kinase activity, peroxisome, protein autophosphorylation
Prupe.6G264600	3.02218	7.45448e-10	3556	uncharacterized LOC18774292	, GO:0016020, GO:0016021	, membrane, integral component of membrane
Prupe.8G021100	-8.14797	7.70676e-10	1483	---NA---	GO:0016020, GO:0016021	membrane, integral component of membrane
Prupe.4G255600	4.12051	7.85725e-10	1813	glucan endo-1,3-beta-glucosidase	GO:0005975, GO:0016787, GO:0016798, GO:0008152, GO:0004553, GO:0042973, GO:0046658	carbohydrate metabolic process, hydrolase activity, hydrolase activity, acting on glycosyl bonds, metabolic process, hydrolase activity, hydrolyzing O-glycosyl compounds, glucan endo-1,3-beta-D-glucosidase activity, anchored component of plasma membrane
Prupe.4G149700	3.91285	8.14547e-10	3461	---NA---	GO:0043531, GO:0006952	ADP binding, defense response
Prupe.4G059200	-3.88923	8.31752e-10	3841	protein CHUP1, chloroplastic	GO:0009658, GO:0009707	chloroplast organization, chloroplast outer membrane
Prupe.2G178400	4.29167	8.32022e-10	1169	uncharacterized LOC18785141	GO:0016020, GO:0016021	membrane, integral component of membrane
Prupe.5G223800	2.96796	8.35631e-10	3000	---NA---	GO:0005524, GO:0000166, GO:0016301, GO:0016310, GO:0016740, GO:0004672, GO:0006468, GO:0004674, GO:0030247	ATP binding, nucleotide binding, kinase activity, phosphorylation, transferase activity, protein kinase activity, protein phosphorylation, protein serine/threonine kinase activity, polysaccharide binding
Prupe.4G027200	2.81195	8.43524e-10	2901	cysteine-rich receptor-like protein kinase 10	GO:0005524, GO:0016020, GO:0016021, GO:0004672, GO:0006468, GO:0005886, GO:0004674	ATP binding, membrane, integral component of membrane, protein kinase activity, protein phosphorylation, plasma membrane, protein serine/threonine kinase activity
Prupe.1G464800	-2.33579	8.55693e-10	2855	uncharacterized LOC18793291	#N/A	#N/A
Prupe.6G175600	9.12188	8.6442e-10	699	---NA---	#N/A	#N/A
Prupe.4G145300	3.87959	9.18072e-10	5729	ankyrin repeat-containing protein At5g02620	GO:0016020, GO:0016021, GO:0031347, GO:0071446, GO:2000031, GO:0005515	membrane, integral component of membrane, regulation of defense response, cellular response to salicylic acid stimulus, regulation of salicylic acid mediated signaling pathway, protein binding
Prupe.3G024700	3.57391	9.5723e-10	2336	receptor-like protein 2	GO:0016020, GO:0016021, GO:0005515	membrane, integral component of membrane, protein binding
Prupe.7G162300	2.8064	9.6135e-10	2017	---NA---	GO:0003824	catalytic activity
Prupe.8G085400	-3.52624	9.67043e-10	3564	endoglucanase 24	GO:0005975, GO:0016787, GO:0016798, GO:0008152, GO:0004553, GO:0008810, GO:0000272, GO:0030245	carbohydrate metabolic process, hydrolase activity, hydrolase activity, acting on glycosyl bonds, metabolic process, hydrolase activity, hydrolyzing O-glycosyl compounds, cellulase activity, polysaccharide catabolic process, cellulose catabolic process
Prupe.1G246100	-2.04034	9.77338e-10	1431	probable E3 ubiquitin-protein ligase XERICO	#N/A	#N/A
Prupe.6G133800	-3.61377	1.02052e-09	1949	uncharacterized LOC109949513	GO:0003700, GO:0006355	DNA-binding transcription factor activity, regulation of transcription, DNA-templated
Prupe.5G015000	-2.11225	1.03758e-09	6831	rop guanine nucleotide exchange factor 14	GO:0050790, GO:0005085, GO:0005089, GO:0080092	regulation of catalytic activity, guanyl-nucleotide exchange factor activity, Rho guanyl-nucleotide exchange factor activity, regulation of pollen tube growth
Prupe.1G151700	-5.06095	1.07341e-09	3679	heavy metal-associated isoprenylated plant protein 32	GO:0046872, GO:0030001	metal ion binding, metal ion transport
Prupe.6G193200	2.45284	1.08001e-09	1340	uncharacterized LOC18773337	#N/A	#N/A
Prupe.I000600	2.62335	1.11085e-09	5927	---NA---	GO:0005524, GO:0042626, GO:0016021, GO:0055085, GO:0000166, GO:0016020, GO:0016887, GO:0000325, GO:0005774	ATP binding, ATPase-coupled transmembrane transporter activity, integral component of membrane, transmembrane transport, nucleotide binding, membrane, ATPase activity, plant-type vacuole, vacuolar membrane
Prupe.6G134300	-12.8768	1.12904e-09	949	uncharacterized LOC18774371	#N/A	#N/A
Prupe.1G074000	5.29543	1.13795e-09	3831	receptor kinase-like protein Xa21	GO:0005524, GO:0000166, GO:0016301, GO:0016310, GO:0016020, GO:0016021, GO:0016740, GO:0004672, GO:0006468, GO:0004674, GO:0005515	ATP binding, nucleotide binding, kinase activity, phosphorylation, membrane, integral component of membrane, transferase activity, protein kinase activity, protein phosphorylation, protein serine/threonine kinase activity, protein binding
Prupe.4G243900	3.39573	1.1453e-09	1475	formin-like protein 20	#N/A	#N/A
Prupe.4G264400	8.96639	1.15135e-09	1651	probable inactive 2-oxoglutarate-dependent dioxygenase AOP2	GO:0055114, GO:0016491, GO:0046872, GO:0051213	oxidation-reduction process, oxidoreductase activity, metal ion binding, dioxygenase activity
Prupe.6G120700	2.55504	1.15867e-09	6325	MLO-like protein 1	GO:0005516, GO:0016020, GO:0016021, GO:0006952, GO:0009607	calmodulin binding, membrane, integral component of membrane, defense response, response to biotic stimulus
Prupe.5G223600	2.73563	1.18175e-09	3335	protein SAR DEFICIENT 1	GO:0006355, GO:0005516, GO:0003700, GO:0043565, GO:0005634, GO:0080142	regulation of transcription, DNA-templated, calmodulin binding, DNA-binding transcription factor activity, sequence-specific DNA binding, nucleus, regulation of salicylic acid biosynthetic process
Prupe.1G333900	-3.47967	1.18487e-09	5633	dynamin-related protein 1C	GO:0003924, GO:0005525, GO:0000166, GO:0016020, GO:0005737, GO:0008017, GO:0048285, GO:0000266	GTPase activity, GTP binding, nucleotide binding, membrane, cytoplasm, microtubule binding, organelle fission, mitochondrial fission
Prupe.2G160900	-8.13802	1.21127e-09	1159	---NA---	GO:0055114, GO:0016020	oxidation-reduction process, membrane
Prupe.2G262900	3.67273	1.23064e-09	572	---NA---	#N/A	#N/A
Prupe.1G043300	-3.39073	1.23122e-09	1718	cell number regulator 11	#N/A	#N/A
Prupe.6G329300	-2.11252	1.24379e-09	3518	probable serine/threonine-protein kinase PBL7	GO:0005524, GO:0000166, GO:0016301, GO:0016310, GO:0016020, GO:0016021, GO:0016740, GO:0004672, GO:0006468, GO:0004674	ATP binding, nucleotide binding, kinase activity, phosphorylation, membrane, integral component of membrane, transferase activity, protein kinase activity, protein phosphorylation, protein serine/threonine kinase activity
Prupe.7G051800	4.63188	1.26065e-09	2261	---NA---	GO:0005975, GO:0016787, GO:0016798, GO:0008152, GO:0004553, GO:0042973, GO:0005618, GO:0046658	carbohydrate metabolic process, hydrolase activity, hydrolase activity, acting on glycosyl bonds, metabolic process, hydrolase activity, hydrolyzing O-glycosyl compounds, glucan endo-1,3-beta-D-glucosidase activity, cell wall, anchored component of plasma membrane
Prupe.3G119100	-9.8	1.27027e-09	1366	trans-resveratrol di-O-methyltransferase-like	GO:0046983, GO:0008168, GO:0016740, GO:0032259, GO:0008171, GO:0008757, GO:0019438	protein dimerization activity, methyltransferase activity, transferase activity, methylation, O-methyltransferase activity, S-adenosylmethionine-dependent methyltransferase activity, aromatic compound biosynthetic process
Prupe.6G023800	-2.55679	1.27885e-09	2775	zinc finger protein WIP2	GO:0005634, GO:0003700, GO:0006355, GO:0010468, GO:0003676, GO:0048856	nucleus, DNA-binding transcription factor activity, regulation of transcription, DNA-templated, regulation of gene expression, nucleic acid binding, anatomical structure development
Prupe.1G177000	-3.56739	1.35151e-09	3787	probably inactive leucine-rich repeat receptor-like protein kinase At3g28040	GO:0005524, GO:0016020, GO:0016021, GO:0004672, GO:0006468, GO:0005886, GO:0005515	ATP binding, membrane, integral component of membrane, protein kinase activity, protein phosphorylation, plasma membrane, protein binding
Prupe.5G130500	-3.06129	1.35151e-09	2140	transcription factor MYC2	GO:0005634, GO:0046983, GO:0003700, GO:0000976, GO:0006355	nucleus, protein dimerization activity, DNA-binding transcription factor activity, transcription regulatory region sequence-specific DNA binding, regulation of transcription, DNA-templated
Prupe.1G477000	-9.26652	1.38791e-09	2283	BURP domain-containing protein 5	#N/A	#N/A
Prupe.4G200100	3.92502	1.40802e-09	4574	(-)-alpha-pinene synthase	GO:0046872, GO:0000287, GO:0010333, GO:0016829	metal ion binding, magnesium ion binding, terpene synthase activity, lyase activity
Prupe.6G274400	-11.7606	1.40802e-09	1660	lactosylceramide 4-alpha-galactosyltransferase	#N/A	#N/A
Prupe.1G229000	-3.90827	1.43525e-09	1238	uncharacterized protein At3g27210	#N/A	#N/A
Prupe.1G292400	4.35685	1.47343e-09	4047	cytochrome P450 CYP749A22	GO:0055114, GO:0016491, GO:0016020, GO:0016021, GO:0046872, GO:0004497, GO:0005506, GO:0016705, GO:0020037	oxidation-reduction process, oxidoreductase activity, membrane, integral component of membrane, metal ion binding, monooxygenase activity, iron ion binding, oxidoreductase activity, acting on paired donors, with incorporation or reduction of molecular oxygen, heme binding
Prupe.6G065400	2.82715	1.48371e-09	3992	probable serine/threonine-protein kinase BSK3	GO:0005886, GO:0005524, GO:0016020, GO:0004672, GO:0006468, GO:0009742, GO:0005515	plasma membrane, ATP binding, membrane, protein kinase activity, protein phosphorylation, brassinosteroid mediated signaling pathway, protein binding
Prupe.6G137800	3.03607	1.52113e-09	2855	---NA---	#N/A	#N/A
Prupe.1G033900	6.33923	1.54675e-09	4468	---NA---	GO:0016020, GO:0016021, GO:0016740, GO:0016757, GO:0016760, GO:0030244, GO:0097502, GO:0071555, GO:0005886, GO:0005802, GO:0009833, GO:0051753	membrane, integral component of membrane, transferase activity, transferase activity, transferring glycosyl groups, cellulose synthase (UDP-forming) activity, cellulose biosynthetic process, mannosylation, cell wall organization, plasma membrane, trans-Golgi network, plant-type primary cell wall biogenesis, mannan synthase activity
Prupe.3G129800	-11.8954	1.62679e-09	1392	trans-resveratrol di-O-methyltransferase-like	GO:0046983, GO:0008168, GO:0016740, GO:0032259, GO:0008171, GO:0008757, GO:0019438	protein dimerization activity, methyltransferase activity, transferase activity, methylation, O-methyltransferase activity, S-adenosylmethionine-dependent methyltransferase activity, aromatic compound biosynthetic process
Prupe.4G104700	2.45428	1.69083e-09	6995	probable LRR receptor-like serine/threonine-protein kinase At1g56130	GO:0005524, GO:0016020, GO:0016021, GO:0004672, GO:0006468, GO:0005886, GO:0004674, GO:0046777	ATP binding, membrane, integral component of membrane, protein kinase activity, protein phosphorylation, plasma membrane, protein serine/threonine kinase activity, protein autophosphorylation
Prupe.3G197300	-7.85281	1.69385e-09	440	---NA---	GO:0005634, GO:0046982, GO:0006355, GO:0043565, GO:0016602, GO:0000981, GO:0045944, GO:0006357, GO:0000978, GO:0001228	nucleus, protein heterodimerization activity, regulation of transcription, DNA-templated, sequence-specific DNA binding, CCAAT-binding factor complex, DNA-binding transcription factor activity, RNA polymerase II-specific, positive regulation of transcription by RNA polymerase II, regulation of transcription by RNA polymerase II, RNA polymerase II cis-regulatory region sequence-specific DNA bindin…
Prupe.8G202000	-3.31347	1.72095e-09	9045	endoribonuclease Dicer homolog 3a	GO:0005524, GO:0000166, GO:0003677, GO:0004386, GO:0003723, GO:0016787, GO:0090502, GO:0006396, GO:0090305, GO:0004525, GO:0016891, GO:0031047, GO:0090501, GO:0004518, GO:0004519, GO:0005515, GO:0016020, GO:0016021, GO:0005730, GO:0003725, GO:0051214, GO:0010267, GO:0010216, GO:0005634, GO:0005737, GO:0030422, GO:0051607	ATP binding, nucleotide binding, DNA binding, helicase activity, RNA binding, hydrolase activity, RNA phosphodiester bond hydrolysis, endonucleolytic, RNA processing, nucleic acid phosphodiester bond hydrolysis, ribonuclease III activity, endoribonuclease activity, producing 5'-phosphomonoesters, gene silencing by RNA, RNA phosphodiester bond hydrolysis, nuclease activity, endonuclease activity, …
Prupe.1G474700	-8.20591	1.75261e-09	1590	---NA---	#N/A	#N/A
Prupe.2G287400	-3.20013	1.77672e-09	3398	uncharacterized LOC18784966	#N/A	#N/A
Prupe.5G087900	-4.35493	1.90849e-09	3369	transcription factor MYC4	GO:0005634, GO:0046983, GO:0003700, GO:0000976, GO:0006355	nucleus, protein dimerization activity, DNA-binding transcription factor activity, transcription regulatory region sequence-specific DNA binding, regulation of transcription, DNA-templated
Prupe.3G017700	-2.51553	1.91909e-09	7894	condensin complex subunit 3	GO:0005694, GO:0007049, GO:0051301, GO:0007076, GO:0030261, GO:0000796, GO:0000793, GO:0009506	chromosome, cell cycle, cell division, mitotic chromosome condensation, chromosome condensation, condensin complex, condensed chromosome, plasmodesma
Prupe.2G093000	8.24336	1.93387e-09	2768	---NA---	GO:0005524, GO:0000166, GO:0016301, GO:0016310, GO:0016020, GO:0016021, GO:0016740, GO:0004672, GO:0006468, GO:0030247, GO:0004674	ATP binding, nucleotide binding, kinase activity, phosphorylation, membrane, integral component of membrane, transferase activity, protein kinase activity, protein phosphorylation, polysaccharide binding, protein serine/threonine kinase activity
Prupe.7G141300	5.29736	1.93412e-09	3121	salicylic acid-binding protein 2	GO:0080030, GO:0080031, GO:0080032, GO:0009694, GO:0009696	methyl indole-3-acetate esterase activity, methyl salicylate esterase activity, methyl jasmonate esterase activity, jasmonic acid metabolic process, salicylic acid metabolic process
Prupe.3G046100	2.02736	1.96861e-09	7140	probable phospholipid-transporting ATPase 4	GO:0000287, GO:0005524, GO:0000166, GO:0016020, GO:0016021, GO:0015914, GO:0004012, GO:0140326, GO:0034204, GO:0005886, GO:0045332	magnesium ion binding, ATP binding, nucleotide binding, membrane, integral component of membrane, phospholipid transport, GO_0004012, ATPase-coupled intramembrane lipid transporter activity, lipid translocation, plasma membrane, phospholipid translocation
Prupe.7G197400	2.75165	1.97293e-09	2541	---NA---	GO:0016020, GO:0016021	membrane, integral component of membrane
Prupe.7G097600	-5.35057	1.98843e-09	1816	probable aspartyl protease At4g16563	GO:0004190, GO:0006508, GO:0016020, GO:0009505	aspartic-type endopeptidase activity, proteolysis, membrane, plant-type cell wall
Prupe.6G343900	3.78637	2.08092e-09	972	pathogenesis-related protein PR-4-like	GO:0050832, GO:0042742	defense response to fungus, defense response to bacterium
Prupe.8G099600	-9.10303	2.10287e-09	1194	organ-specific protein S2	#N/A	#N/A
Prupe.2G165100	2.96231	2.12933e-09	3493	O-glucosyltransferase rumi homolog	#N/A	#N/A
Prupe.1G497600	5.47208	2.15353e-09	3318	esterase	GO:0016788	hydrolase activity, acting on ester bonds
Prupe.8G235300	-3.44544	2.16583e-09	3713	uncharacterized LOC18766664	GO:0005515, GO:0016020, GO:0016021	protein binding, membrane, integral component of membrane
Prupe.4G284100	-4.37515	2.19905e-09	1461	probable LRR receptor-like serine/threonine-protein kinase At5g63710	GO:0005524, GO:0000166, GO:0016301, GO:0016310, GO:0016740, GO:0004672, GO:0006468, GO:0004674	ATP binding, nucleotide binding, kinase activity, phosphorylation, transferase activity, protein kinase activity, protein phosphorylation, protein serine/threonine kinase activity
Prupe.1G325500	8.36693	2.22778e-09	2439	---NA---	#N/A	#N/A
Prupe.2G127000	2.92015	2.25408e-09	4768	---NA---	GO:0007165, GO:0016787, GO:0043531, GO:0005515, GO:0050135, GO:0061809	signal transduction, hydrolase activity, ADP binding, protein binding, NAD(P)+ nucleosidase activity, NAD+ nucleotidase, cyclic ADP-ribose generating
Prupe.4G235300	2.28517	2.25992e-09	6583	ABC transporter C family member 3	GO:0055085, GO:0005524, GO:0000166, GO:0016020, GO:0016021, GO:0016887, GO:0042626, GO:0000325, GO:0005774	transmembrane transport, ATP binding, nucleotide binding, membrane, integral component of membrane, ATPase activity, ATPase-coupled transmembrane transporter activity, plant-type vacuole, vacuolar membrane
Prupe.5G134700	10.05	2.25992e-09	1790	protein DMR6-LIKE OXYGENASE 2	GO:0055114, GO:0016491, GO:0046872	oxidation-reduction process, oxidoreductase activity, metal ion binding
Prupe.6G293000	-11.0201	2.27419e-09	1021	---NA---	GO:0008289, GO:0006869, GO:0016020	lipid binding, lipid transport, membrane
Prupe.2G183900	-2.51846	2.28476e-09	1959	uncharacterized LOC109947480	#N/A	#N/A
Prupe.2G105400	3.35422	2.29223e-09	6365	glutamate receptor 1.3	GO:0016020, GO:0016021, GO:0006811, GO:0034220, GO:0004970, GO:0015276, GO:0005886, GO:0038023	membrane, integral component of membrane, ion transport, ion transmembrane transport, ionotropic glutamate receptor activity, ligand-gated ion channel activity, plasma membrane, signaling receptor activity
Prupe.1G245400	3.07772	2.45036e-09	2042	non-functional NADPH-dependent codeinone reductase 2	GO:0016491, GO:0055114, GO:0005829, GO:0004032	oxidoreductase activity, oxidation-reduction process, cytosol, alditol:NADP+ 1-oxidoreductase activity
Prupe.4G098500	9.79524	2.52671e-09	1948	berberine bridge enzyme-like 17	GO:0016491, GO:0055114, GO:0050660, GO:0071949	oxidoreductase activity, oxidation-reduction process, flavin adenine dinucleotide binding, FAD binding
Prupe.5G232500	-4.15748	2.52941e-09	1456	---NA---	GO:0005576, GO:0006952	extracellular region, defense response
Prupe.1G187000	7.1349	2.57609e-09	2310	monothiol glutaredoxin-S17-like	#N/A	#N/A
Prupe.1G506500	2.04775	2.62723e-09	566	---NA---	#N/A	#N/A
Prupe.6G192500	3.70543	2.64309e-09	3537	WEB family protein At5g16730, chloroplastic	GO:0007131	reciprocal meiotic recombination
Prupe.1G552100	2.40526	2.7045e-09	1778	crocetin glucosyltransferase, chloroplastic	GO:0016740, GO:0016757, GO:0016758, GO:0008194, GO:0080043, GO:0080044	transferase activity, transferase activity, transferring glycosyl groups, transferase activity, transferring hexosyl groups, UDP-glycosyltransferase activity, quercetin 3-O-glucosyltransferase activity, quercetin 7-O-glucosyltransferase activity
Prupe.8G018600	-3.97727	2.72553e-09	3140	alcohol dehydrogenase 1	GO:0055114, GO:0016491, GO:0046872, GO:0008270, GO:0005829, GO:0004024, GO:0051903, GO:0046294	oxidation-reduction process, oxidoreductase activity, metal ion binding, zinc ion binding, cytosol, alcohol dehydrogenase activity, zinc-dependent, S-(hydroxymethyl)glutathione dehydrogenase activity, formaldehyde catabolic process
Prupe.6G338400	2.32075	2.93343e-09	4089	---NA---	GO:0016740, GO:0008652, GO:0006535, GO:0004124, GO:0019344, GO:0005737, GO:0030170	transferase activity, cellular amino acid biosynthetic process, cysteine biosynthetic process from serine, cysteine synthase activity, cysteine biosynthetic process, cytoplasm, pyridoxal phosphate binding
Prupe.5G151400	2.77067	3.13142e-09	3693	probable inactive purple acid phosphatase 27	GO:0016787, GO:0046872, GO:0016311, GO:0003993	hydrolase activity, metal ion binding, dephosphorylation, acid phosphatase activity
Prupe.1G489100	-2.45105	3.17339e-09	4213	probable receptor-like serine/threonine-protein kinase At5g57670	GO:0005524, GO:0000166, GO:0016301, GO:0016310, GO:0016740, GO:0004672, GO:0006468, GO:0005886	ATP binding, nucleotide binding, kinase activity, phosphorylation, transferase activity, protein kinase activity, protein phosphorylation, plasma membrane
Prupe.6G026300	3.92062	3.21366e-09	4051	oligopeptide transporter 1-like	GO:0055085, GO:0016020, GO:0016021, GO:0015031, GO:0005887, GO:0035673, GO:0035672, GO:0015833	transmembrane transport, membrane, integral component of membrane, protein transport, integral component of plasma membrane, oligopeptide transmembrane transporter activity, oligopeptide transmembrane transport, peptide transport
Prupe.5G130400	-4.89021	3.22257e-09	3095	transcription factor bHLH14	GO:0005634, GO:0046983, GO:0003700, GO:0000976, GO:0006355	nucleus, protein dimerization activity, DNA-binding transcription factor activity, transcription regulatory region sequence-specific DNA binding, regulation of transcription, DNA-templated
Prupe.1G291500	2.70628	3.28472e-09	2406	cytochrome P450 CYP749A22	GO:0055114, GO:0016491, GO:0016020, GO:0016021, GO:0046872, GO:0004497, GO:0005506, GO:0016705, GO:0020037	oxidation-reduction process, oxidoreductase activity, membrane, integral component of membrane, metal ion binding, monooxygenase activity, iron ion binding, oxidoreductase activity, acting on paired donors, with incorporation or reduction of molecular oxygen, heme binding
Prupe.6G008100	4.99287	3.29146e-09	3940	DNA polymerase zeta catalytic subunit-like	GO:0005506, GO:0051536, GO:0016226, GO:0005739, GO:0051539, GO:0097428, GO:0016020, GO:0016021	iron ion binding, iron-sulfur cluster binding, iron-sulfur cluster assembly, mitochondrion, 4 iron, 4 sulfur cluster binding, protein maturation by iron-sulfur cluster transfer, membrane, integral component of membrane
Prupe.6G049700	-7.82338	3.35912e-09	1898	---NA---	GO:0016740, GO:0016758, GO:0008194	transferase activity, transferase activity, transferring hexosyl groups, UDP-glycosyltransferase activity
Prupe.3G143800	4.6931	3.54186e-09	3969	zinc finger protein 6	GO:0006355, GO:0043565, GO:0010026, GO:0009740, GO:0009736, GO:0022626, GO:0009788, GO:0044212, GO:0003700, GO:0005634, GO:0000976	regulation of transcription, DNA-templated, sequence-specific DNA binding, trichome differentiation, gibberellic acid mediated signaling pathway, cytokinin-activated signaling pathway, cytosolic ribosome, negative regulation of abscisic acid-activated signaling pathway, GO_0044212, DNA-binding transcription factor activity, nucleus, transcription regulatory region sequence-specific DNA binding
Prupe.1G524600	3.54079	3.56246e-09	1630	E3 ubiquitin-protein ligase ATL6	GO:0016020, GO:0016021	membrane, integral component of membrane
Prupe.6G286000	2.99265	3.56246e-09	2409	probable WRKY transcription factor 33	GO:0005634, GO:0003677, GO:0006355, GO:0003700, GO:0043565, GO:0006970, GO:0009408, GO:0009409, GO:0009414, GO:0009627, GO:0009651, GO:0010120, GO:0010200, GO:0010508, GO:0034605, GO:0042742, GO:0050832, GO:0070370	nucleus, DNA binding, regulation of transcription, DNA-templated, DNA-binding transcription factor activity, sequence-specific DNA binding, response to osmotic stress, response to heat, response to cold, response to water deprivation, systemic acquired resistance, response to salt stress, camalexin biosynthetic process, response to chitin, positive regulation of autophagy, cellular response to he…
Prupe.5G039900	2.16875	3.57005e-09	2725	plant intracellular Ras-group-related LRR protein 5	GO:0005515	protein binding
Prupe.3G025400	-8.2147	3.68661e-09	4884	U-box domain-containing protein 35	GO:0005524, GO:0004672, GO:0006468	ATP binding, protein kinase activity, protein phosphorylation
Prupe.4G263200	4.48276	3.71981e-09	2146	---NA---	#N/A	#N/A
Prupe.6G254400	3.43514	3.75333e-09	4068	cyclic nucleotide-gated ion channel 1-like	GO:0016020, GO:0016021	membrane, integral component of membrane
Prupe.6G237100	-10.2282	3.77175e-09	1114	vegetative cell wall protein gp1-like	GO:0016020, GO:0016021	membrane, integral component of membrane
Prupe.6G121800	5.20374	3.97181e-09	7675	pleiotropic drug resistance protein 2	GO:0005524, GO:0000166, GO:0016020, GO:0016021, GO:0042626, GO:0055085, GO:0016887	ATP binding, nucleotide binding, membrane, integral component of membrane, ATPase-coupled transmembrane transporter activity, transmembrane transport, ATPase activity
Prupe.7G198000	-10.6282	4.04841e-09	2080	flavonoid 3'-monooxygenase	GO:0055114, GO:0016491, GO:0046872, GO:0004497, GO:0005506, GO:0016705, GO:0020037	oxidation-reduction process, oxidoreductase activity, metal ion binding, monooxygenase activity, iron ion binding, oxidoreductase activity, acting on paired donors, with incorporation or reduction of molecular oxygen, heme binding
Prupe.8G161700	-3.52442	4.21193e-09	2956	putative amidase C869.01	#N/A	#N/A
Prupe.2G077800	-7.77268	4.2245e-09	2230	L-ascorbate oxidase	GO:0055114, GO:0016491, GO:0009506	oxidation-reduction process, oxidoreductase activity, plasmodesma
Prupe.4G146200	-3.03062	4.32123e-09	1225	probable glutathione S-transferase parC	GO:0006749, GO:0005737, GO:0004364, GO:0005515	glutathione metabolic process, cytoplasm, glutathione transferase activity, protein binding
Prupe.2G080800	-6.67104	4.43532e-09	2647	---NA---	GO:0016788	hydrolase activity, acting on ester bonds
Prupe.4G261100	5.815	4.44504e-09	945	---NA---	#N/A	#N/A
Prupe.1G409700	3.47044	4.47827e-09	3003	---NA---	GO:0005515	protein binding
Prupe.7G271400	3.02943	4.68123e-09	5224	MLO-like protein 1	GO:0005516, GO:0016020, GO:0016021, GO:0006952, GO:0009607	calmodulin binding, membrane, integral component of membrane, defense response, response to biotic stimulus
Prupe.7G059000	-2.13591	4.78222e-09	4346	quinone oxidoreductase PIG3	GO:0055114, GO:0016491	oxidation-reduction process, oxidoreductase activity
Prupe.1G305600	-2.89012	4.86264e-09	2636	probable galacturonosyltransferase-like 3	GO:0016020, GO:0016021, GO:0016740, GO:0016757, GO:0005794	membrane, integral component of membrane, transferase activity, transferase activity, transferring glycosyl groups, Golgi apparatus
Prupe.4G054300	-3.1651	5.10836e-09	451	histone H3.2	GO:0005634, GO:0046982, GO:0003677, GO:0000786	nucleus, protein heterodimerization activity, DNA binding, nucleosome
Prupe.3G251000	2.86006	5.22924e-09	3295	uncharacterized LOC18781867	GO:0005524, GO:0000166, GO:0016301, GO:0016310, GO:0016020, GO:0016021, GO:0016740, GO:0004672, GO:0006468, GO:0004674, GO:0005886, GO:0046777, GO:0009506	ATP binding, nucleotide binding, kinase activity, phosphorylation, membrane, integral component of membrane, transferase activity, protein kinase activity, protein phosphorylation, protein serine/threonine kinase activity, plasma membrane, protein autophosphorylation, plasmodesma
Prupe.6G160100	2.24775	5.34959e-09	8606	TMV resistance protein N	GO:0007165, GO:0016787, GO:0043531, GO:0005515, GO:0050135, GO:0061809	signal transduction, hydrolase activity, ADP binding, protein binding, NAD(P)+ nucleosidase activity, NAD+ nucleotidase, cyclic ADP-ribose generating
Prupe.1G327500	5.57722	5.36435e-09	847	MLP-like protein 329	GO:0006952, GO:0009607	defense response, response to biotic stimulus
Prupe.8G011000	7.34692	5.73741e-09	3126	protein DMR6-LIKE OXYGENASE 1	GO:0055114, GO:0016491, GO:0046872, GO:0051213	oxidation-reduction process, oxidoreductase activity, metal ion binding, dioxygenase activity
Prupe.1G543700	11.0137	5.78839e-09	2064	2-alkenal reductase (NADP(+)-dependent)	GO:0055114, GO:0032440	oxidation-reduction process, 2-alkenal reductase [NAD(P)+] activity
Prupe.1G491400	2.25181	5.92063e-09	3166	chloroplast processing peptidase-like	GO:0016020, GO:0016021, GO:0008233, GO:0006508, GO:0004252, GO:0008236, GO:0005887, GO:0009535, GO:0010027, GO:0006465	membrane, integral component of membrane, peptidase activity, proteolysis, serine-type endopeptidase activity, serine-type peptidase activity, integral component of plasma membrane, chloroplast thylakoid membrane, thylakoid membrane organization, signal peptide processing
Prupe.I003100	4.14233	6.00256e-09	3520	coatomer subunit beta'-2	GO:0005515	protein binding
Prupe.3G099600	-3.3414	6.08036e-09	1467	lamin-like protein	GO:0009055, GO:0022900, GO:0046658	electron transfer activity, electron transport chain, anchored component of plasma membrane
Prupe.1G456300	3.13643	6.15638e-09	3014	gamma-glutamylcyclotransferase 2-1	GO:0006751, GO:0003839, GO:0005737	glutathione catabolic process, gamma-glutamylcyclotransferase activity, cytoplasm
Prupe.1G570800	5.28799	6.2751e-09	1958	11S globulin seed storage protein 2	GO:0016020, GO:0016021, GO:0045735	membrane, integral component of membrane, nutrient reservoir activity
Prupe.8G264100	-6.38174	6.42597e-09	4011	pectinesterase	GO:0016787, GO:0045490, GO:0004857, GO:0030599, GO:0045330, GO:0042545, GO:0043086, GO:0005618, GO:0046910	hydrolase activity, pectin catabolic process, enzyme inhibitor activity, pectinesterase activity, aspartyl esterase activity, cell wall modification, negative regulation of catalytic activity, cell wall, pectinesterase inhibitor activity
Prupe.1G201900	-2.50261	6.48021e-09	10167	helicase SEN1	GO:0004386, GO:0003723	helicase activity, RNA binding
Prupe.3G300900	2.31596	6.7105e-09	4518	lysine histidine transporter 1	GO:0016020, GO:0016021, GO:0009734, GO:0055085, GO:0005886, GO:0015293, GO:0006865	membrane, integral component of membrane, auxin-activated signaling pathway, transmembrane transport, plasma membrane, symporter activity, amino acid transport
Prupe.3G254200	-2.35348	7.16093e-09	1378	---NA---	GO:0016747	transferase activity, transferring acyl groups other than amino-acyl groups
Prupe.8G100700	3.7278	7.18215e-09	2527	putative polyol transporter 1	GO:0055085, GO:0016020, GO:0016021, GO:0022857	transmembrane transport, membrane, integral component of membrane, transmembrane transporter activity
Prupe.8G130900	10.0762	7.25061e-09	1409	UDP-glucose flavonoid 3-O-glucosyltransferase 7	GO:0016740, GO:0016757, GO:0016758, GO:0008194	transferase activity, transferase activity, transferring glycosyl groups, transferase activity, transferring hexosyl groups, UDP-glycosyltransferase activity
Prupe.2G080100	-4.68424	7.28136e-09	2737	GDSL esterase/lipase At5g03610	GO:0016788	hydrolase activity, acting on ester bonds
Prupe.1G397600	-2.78563	7.70634e-09	2993	aspartyl protease family protein At5g10770	GO:0004190, GO:0006508	aspartic-type endopeptidase activity, proteolysis
Prupe.5G231000	-4.44184	7.95884e-09	2122	uncharacterized GPI-anchored protein At4g28100	#N/A	#N/A
Prupe.7G142200	-2.53755	8.4265e-09	3509	salicylic acid-binding protein 2	GO:0080030, GO:0080031, GO:0080032, GO:0009694, GO:0009696,	methyl indole-3-acetate esterase activity, methyl salicylate esterase activity, methyl jasmonate esterase activity, jasmonic acid metabolic process, salicylic acid metabolic process,
Prupe.7G246500	7.19646	8.7719e-09	2307	---NA---	GO:0009055, GO:0022900, GO:0046658	electron transfer activity, electron transport chain, anchored component of plasma membrane
Prupe.2G164500	-7.61074	8.84917e-09	1197	---NA---	GO:0003723, GO:0016020, GO:0016021, GO:0006396, GO:0004000, GO:0005737, GO:0005730, GO:0003725, GO:0003726, GO:0008251, GO:0006382	RNA binding, membrane, integral component of membrane, RNA processing, adenosine deaminase activity, cytoplasm, nucleolus, double-stranded RNA binding, double-stranded RNA adenosine deaminase activity, tRNA-specific adenosine deaminase activity, adenosine to inosine editing
Prupe.8G066900	-2.67254	8.86878e-09	2728	protein DMR6-LIKE OXYGENASE 2	GO:0055114, GO:0016491, GO:0046872	oxidation-reduction process, oxidoreductase activity, metal ion binding
Prupe.4G198800	-9.6887	8.95325e-09	538	---NA---	#N/A	#N/A
Prupe.3G159100	-5.48276	8.95396e-09	696	---NA---	GO:0016020, GO:0016021	membrane, integral component of membrane
Prupe.3G284400	2.9564	8.99527e-09	2975	2-methylene-furan-3-one reductase	GO:0055114, GO:0016491, GO:0008270	oxidation-reduction process, oxidoreductase activity, zinc ion binding
Prupe.7G256600	-4.52308	9.03471e-09	3779	uncharacterized LOC18769375	#N/A	#N/A
Prupe.1G358200	3.28074	9.05619e-09	1833	ganglioside-induced differentiation-associated protein 2	#N/A	#N/A
Prupe.1G078700	-2.58492	9.08947e-09	8538	putative inactive cadmium/zinc-transporting ATPase HMA3	GO:0000166, GO:0005524, GO:0016020, GO:0016021, GO:0046872, GO:0030001, GO:0006812, GO:0098655, GO:0019829, GO:0015086, GO:0071577, GO:0070574, GO:0005385	nucleotide binding, ATP binding, membrane, integral component of membrane, metal ion binding, metal ion transport, cation transport, cation transmembrane transport, ATPase-coupled cation transmembrane transporter activity, cadmium ion transmembrane transporter activity, zinc ion transmembrane transport, cadmium ion transmembrane transport, zinc ion transmembrane transporter activity
Prupe.4G020500	7.89816	9.08947e-09	2932	---NA---	#N/A	#N/A
Prupe.2G055300	-4.11543	9.16076e-09	2945	---NA---	#N/A	#N/A
Prupe.1G529800	-7.43983	9.29832e-09	1481	aspartyl protease AED3	GO:0004190, GO:0006508, GO:0043067	aspartic-type endopeptidase activity, proteolysis, regulation of programmed cell death
Prupe.7G093400	2.83252	9.36776e-09	2180	syntaxin-121	GO:0016020, GO:0016021, GO:0015031, GO:0016192, GO:0005886, GO:0006886, GO:0006887, GO:0000149, GO:0005484, GO:0006906, GO:0048278, GO:0012505, GO:0031201	membrane, integral component of membrane, protein transport, vesicle-mediated transport, plasma membrane, intracellular protein transport, exocytosis, SNARE binding, SNAP receptor activity, vesicle fusion, vesicle docking, endomembrane system, SNARE complex
Prupe.3G284800	2.8829	9.48172e-09	1686	2-methylene-furan-3-one reductase	GO:0055114, GO:0016491, GO:0008270	oxidation-reduction process, oxidoreductase activity, zinc ion binding
Prupe.1G430500	-3.39831	9.55619e-09	2229	cyclin-D3-1	GO:0007049, GO:0051301, GO:0005634, GO:0005737, GO:0000079, GO:0000307, GO:0016538, GO:0044772	cell cycle, cell division, nucleus, cytoplasm, regulation of cyclin-dependent protein serine/threonine kinase activity, cyclin-dependent protein kinase holoenzyme complex, cyclin-dependent protein serine/threonine kinase regulator activity, mitotic cell cycle phase transition
Prupe.2G157600	-2.49048	9.88557e-09	2172	---NA---	GO:0016020, GO:0016021	membrane, integral component of membrane
Prupe.I000300	6.22887	9.88557e-09	758	---NA---	GO:0004867, GO:0009611, GO:0010951, GO:0030414, GO:0010466	serine-type endopeptidase inhibitor activity, response to wounding, negative regulation of endopeptidase activity, peptidase inhibitor activity, negative regulation of peptidase activity
Prupe.4G160700	6.6068	9.94876e-09	2413	putative methyltransferase DDB_G0268948	GO:0008168	methyltransferase activity
Prupe.7G116800	-2.11607	1.03637e-08	2144	PAN domain-containing protein At5g03700	GO:0016020, GO:0016021, GO:0005768, GO:0005794, GO:0005802, GO:0005886	membrane, integral component of membrane, endosome, Golgi apparatus, trans-Golgi network, plasma membrane
Prupe.4G168800	4.57742	1.03857e-08	1860	receptor-like protein 2	GO:0005515	protein binding
Prupe.5G229600	-2.37524	1.0539e-08	4501	ABC transporter A family member 10	GO:0055085, GO:0005524, GO:0000166, GO:0016020, GO:0016021, GO:0016887, GO:0042626, GO:0043231, GO:0005319, GO:0006869	transmembrane transport, ATP binding, nucleotide binding, membrane, integral component of membrane, ATPase activity, ATPase-coupled transmembrane transporter activity, intracellular membrane-bounded organelle, lipid transporter activity, lipid transport
Prupe.4G234200	3.0352	1.05571e-08	3008	---NA---	GO:0005515	protein binding
Prupe.1G128700	2.17148	1.0718e-08	1054	---NA---	GO:0006952, GO:0009607, GO:0004864, GO:0009738, GO:0032515, GO:0010427, GO:0038023, GO:0005634, GO:0005737, GO:0080163	defense response, response to biotic stimulus, protein phosphatase inhibitor activity, abscisic acid-activated signaling pathway, negative regulation of phosphoprotein phosphatase activity, abscisic acid binding, signaling receptor activity, nucleus, cytoplasm, regulation of protein serine/threonine phosphatase activity
Prupe.8G066000	6.14043	1.11814e-08	618	classical arabinogalactan protein 9-like	#N/A	#N/A
Prupe.4G177600	-3.21668	1.1674e-08	173	uncharacterized LOC109948609	#N/A	#N/A
Prupe.1G302300	-5.48946	1.19653e-08	906	---NA---	#N/A	#N/A
Prupe.4G018800	-5.79984	1.21628e-08	4404	L-ascorbate oxidase homolog	GO:0016491, GO:0055114, GO:0005507	oxidoreductase activity, oxidation-reduction process, copper ion binding
Prupe.6G040700	3.79443	1.22831e-08	1234	probable glutathione S-transferase parA	GO:0006749, GO:0005737, GO:0004364, GO:0005515	glutathione metabolic process, cytoplasm, glutathione transferase activity, protein binding
Prupe.1G322500	4.04707	1.23089e-08	1231	---NA---	GO:0016020, GO:0016021	membrane, integral component of membrane
Prupe.1G529500	12.3753	1.25885e-08	2158	probable pectinesterase/pectinesterase inhibitor 7	GO:0016787, GO:0045490, GO:0004857, GO:0030599, GO:0045330, GO:0042545, GO:0043086, GO:0005618, GO:0046910	hydrolase activity, pectin catabolic process, enzyme inhibitor activity, pectinesterase activity, aspartyl esterase activity, cell wall modification, negative regulation of catalytic activity, cell wall, pectinesterase inhibitor activity
Prupe.4G020000	-3.24723	1.27092e-08	7739	probable beta-1,3-galactosyltransferase 3	GO:0016020, GO:0016021, GO:0006486, GO:0000139, GO:0008378, GO:0005794, GO:0016757	membrane, integral component of membrane, protein glycosylation, Golgi membrane, galactosyltransferase activity, Golgi apparatus, transferase activity, transferring glycosyl groups
Prupe.6G301500	2.52972	1.27892e-08	7628	probable leucine-rich repeat receptor-like protein kinase At5g49770	GO:0005524, GO:0000166, GO:0016301, GO:0016310, GO:0016020, GO:0016021, GO:0016740, GO:0004672, GO:0006468, GO:0004674	ATP binding, nucleotide binding, kinase activity, phosphorylation, membrane, integral component of membrane, transferase activity, protein kinase activity, protein phosphorylation, protein serine/threonine kinase activity
Prupe.8G005400	2.21664	1.28038e-08	6961	TMV resistance protein N	GO:0007165, GO:0016787, GO:0043531, GO:0005515, GO:0050135, GO:0061809	signal transduction, hydrolase activity, ADP binding, protein binding, NAD(P)+ nucleosidase activity, NAD+ nucleotidase, cyclic ADP-ribose generating
Prupe.3G013700	2.72314	1.2875e-08	2229	probable acyl-activating enzyme 12, peroxisomal	GO:0003824	catalytic activity
Prupe.8G238000	3.30484	1.34613e-08	1052	non-specific lipid-transfer protein-like protein At2g13820	GO:0016020, GO:0016021, GO:0008289, GO:0006869	membrane, integral component of membrane, lipid binding, lipid transport
Prupe.2G226200	3.20336	1.35655e-08	1913	exocyst complex component EXO70A1-like	GO:0006887, GO:0000145, GO:0015031	exocytosis, exocyst, protein transport
Prupe.1G104300	-7.71877	1.3637e-08	5590	ABC transporter B family member 11	GO:0055085, GO:0005524, GO:0000166, GO:0016020, GO:0016021, GO:0016887, GO:0042626	transmembrane transport, ATP binding, nucleotide binding, membrane, integral component of membrane, ATPase activity, ATPase-coupled transmembrane transporter activity
Prupe.8G174800	3.11222	1.38879e-08	2197	NAC domain-containing protein 35	GO:0003677, GO:0006355, GO:0005634, GO:0045792, GO:0048281, GO:0009965, GO:0010200	DNA binding, regulation of transcription, DNA-templated, nucleus, negative regulation of cell size, inflorescence morphogenesis, leaf morphogenesis, response to chitin
Prupe.2G147700	-4.7189	1.40698e-08	1385	fasciclin-like arabinogalactan protein 8	GO:0046658	anchored component of plasma membrane
Prupe.4G195600	-4.06575	1.42968e-08	1878	---NA---	GO:0005524, GO:0004672, GO:0006468, GO:0004674, GO:0005886, GO:0031625	ATP binding, protein kinase activity, protein phosphorylation, protein serine/threonine kinase activity, plasma membrane, ubiquitin protein ligase binding
Prupe.6G185200	3.5363	1.49826e-08	483	uncharacterized LOC18774293	GO:0016020, GO:0016021, GO:0005886	membrane, integral component of membrane, plasma membrane
Prupe.4G131600	3.51803	1.50453e-08	2954	receptor-like protein 12	GO:0016020, GO:0016021, GO:0005515	membrane, integral component of membrane, protein binding
Prupe.4G085700	2.86327	1.52411e-08	1823	uncharacterized LOC18778441	#N/A	#N/A
Prupe.3G063500	-4.09581	1.60929e-08	1924	---NA---	GO:0055085, GO:0016020, GO:0016021, GO:0015267, GO:0015250, GO:0006833	transmembrane transport, membrane, integral component of membrane, channel activity, water channel activity, water transport
Prupe.6G058100	-2.30362	1.61862e-08	4353	dehydrodolichyl diphosphate synthase 2	GO:0016765, GO:0016740, GO:0005783, GO:0009570, GO:0009409, GO:0002094, GO:0016094, GO:0045547, GO:0009668	transferase activity, transferring alkyl or aryl (other than methyl) groups, transferase activity, endoplasmic reticulum, chloroplast stroma, response to cold, polyprenyltransferase activity, polyprenol biosynthetic process, dehydrodolichyl diphosphate synthase activity, plastid membrane organization
Prupe.1G427300	2.39229	1.62012e-08	2258	isoflavone 2'-hydroxylase	GO:0055114, GO:0016491, GO:0016020, GO:0016021, GO:0046872, GO:0004497, GO:0005506, GO:0016705, GO:0020037, GO:0098542	oxidation-reduction process, oxidoreductase activity, membrane, integral component of membrane, metal ion binding, monooxygenase activity, iron ion binding, oxidoreductase activity, acting on paired donors, with incorporation or reduction of molecular oxygen, heme binding, defense response to other organism
Prupe.3G276500	3.07664	1.69594e-08	1040	probable galacturonosyltransferase-like 10	GO:0016740, GO:0016757, GO:0005794, GO:0006979	transferase activity, transferase activity, transferring glycosyl groups, Golgi apparatus, response to oxidative stress
Prupe.4G203500	3.7709	1.72385e-08	2304	ankyrin repeat-containing protein ITN1	GO:0016020, GO:0016021, GO:0031347, GO:0071446, GO:2000031, GO:0005515	membrane, integral component of membrane, regulation of defense response, cellular response to salicylic acid stimulus, regulation of salicylic acid mediated signaling pathway, protein binding
Prupe.2G002500	5.25179	1.737e-08	559	uncharacterized LOC18786344	GO:0016020, GO:0016021	membrane, integral component of membrane
Prupe.1G173600	-5.26449	1.76385e-08	811	---NA---	#N/A	#N/A
Prupe.1G413900	-3.01633	1.79628e-08	5083	pollen-specific protein SF21	GO:0016020, GO:0016021, GO:2000012, GO:0009409, GO:0009737, GO:0009753	membrane, integral component of membrane, regulation of auxin polar transport, response to cold, response to abscisic acid, response to jasmonic acid
Prupe.3G062100	-7.54034	1.80249e-08	945	---NA---	GO:0016020, GO:0016021, GO:0009055, GO:0022900, GO:0046658	membrane, integral component of membrane, electron transfer activity, electron transport chain, anchored component of plasma membrane
Prupe.1G309900	-3.58451	1.80493e-08	5295	alpha-xylosidase 1	GO:0003824, GO:0005975, GO:0016787, GO:0030246, GO:0016798, GO:0008152, GO:0004553	catalytic activity, carbohydrate metabolic process, hydrolase activity, carbohydrate binding, hydrolase activity, acting on glycosyl bonds, metabolic process, hydrolase activity, hydrolyzing O-glycosyl compounds
Prupe.1G336200	5.73742	1.82229e-08	1343	U-box domain-containing protein 21	GO:0004842, GO:0016567	ubiquitin-protein transferase activity, protein ubiquitination
Prupe.1G011700	-6.70183	1.85498e-08	3374	thermospermine synthase ACAULIS5	GO:0003824, GO:0016740, GO:0006596, GO:0010487	catalytic activity, transferase activity, polyamine biosynthetic process, thermospermine synthase activity
Prupe.1G294500	6.06666	1.87105e-08	1236	ribosome-inactivating protein alpha-trichosanthin-like	GO:0016787, GO:0006952, GO:0030598, GO:0090729, GO:0017148, GO:0035821	hydrolase activity, defense response, rRNA N-glycosylase activity, toxin activity, negative regulation of translation, modulation of process of other organism
Prupe.1G440100	10.029	1.95374e-08	2321	patatin-like protein 2	GO:0016787, GO:0016042, GO:0006629, GO:0004620, GO:0047372	hydrolase activity, lipid catabolic process, lipid metabolic process, phospholipase activity, acylglycerol lipase activity
Prupe.8G128700	-2.70344	1.96945e-08	1532	cytochrome P450 94A1	GO:0055114, GO:0005506, GO:0016705, GO:0020037	oxidation-reduction process, iron ion binding, oxidoreductase activity, acting on paired donors, with incorporation or reduction of molecular oxygen, heme binding
Prupe.3G060000	5.26538	1.98487e-08	9213	ABC transporter G family member 29	GO:0005524, GO:0000166, GO:0016020, GO:0016021, GO:0042626, GO:0055085, GO:0016887	ATP binding, nucleotide binding, membrane, integral component of membrane, ATPase-coupled transmembrane transporter activity, transmembrane transport, ATPase activity
Prupe.2G264900	2.88948	2.0255e-08	2503	WRKY transcription factor 55	GO:0005634, GO:0003677, GO:0006355, GO:0003700, GO:0043565	nucleus, DNA binding, regulation of transcription, DNA-templated, DNA-binding transcription factor activity, sequence-specific DNA binding
Prupe.4G140700	-4.79127	2.02718e-08	1310	vinorine synthase	GO:0016747	transferase activity, transferring acyl groups other than amino-acyl groups
Prupe.6G203700	-7.79281	2.02718e-08	1067	---NA---	GO:0016020, GO:0016021	membrane, integral component of membrane
Prupe.3G226200	-7.50613	2.0375e-08	4261	---NA---	GO:0005524, GO:0016020, GO:0016021, GO:0004672, GO:0006468, GO:0005886, GO:0004674	ATP binding, membrane, integral component of membrane, protein kinase activity, protein phosphorylation, plasma membrane, protein serine/threonine kinase activity
Prupe.7G073700	2.15825	2.05709e-08	903	---NA---	#N/A	#N/A
Prupe.3G155300	-6.64986	2.08352e-08	4084	protein ACCELERATED CELL DEATH 6	GO:0016020, GO:0016021, GO:0031347, GO:0071446, GO:2000031, GO:0005515	membrane, integral component of membrane, regulation of defense response, cellular response to salicylic acid stimulus, regulation of salicylic acid mediated signaling pathway, protein binding
Prupe.2G103300	2.25665	2.09603e-08	4110	LEAF RUST 10 DISEASE-RESISTANCE LOCUS RECEPTOR-LIKE PROTEIN KINASE-like 2.2	GO:0005524, GO:0000166, GO:0016301, GO:0016310, GO:0016020, GO:0016021, GO:0016740, GO:0004672, GO:0006468, GO:0030247	ATP binding, nucleotide binding, kinase activity, phosphorylation, membrane, integral component of membrane, transferase activity, protein kinase activity, protein phosphorylation, polysaccharide binding
Prupe.5G109200	6.46295	2.14224e-08	629	uncharacterized LOC18777871	GO:0016020, GO:0016021	membrane, integral component of membrane
Prupe.1G469200	-9.43897	2.1499e-08	3027	putative receptor-like protein kinase At4g00960	GO:0005524, GO:0000166, GO:0016301, GO:0016310, GO:0016020, GO:0016021, GO:0016740, GO:0004672, GO:0006468, GO:0004674, GO:0005886	ATP binding, nucleotide binding, kinase activity, phosphorylation, membrane, integral component of membrane, transferase activity, protein kinase activity, protein phosphorylation, protein serine/threonine kinase activity, plasma membrane
Prupe.2G305600	-3.58665	2.15866e-08	5477	---NA---	GO:0055085, GO:0005524, GO:0000166, GO:0016020, GO:0016021, GO:0042626, GO:0000325, GO:0005774	transmembrane transport, ATP binding, nucleotide binding, membrane, integral component of membrane, ATPase-coupled transmembrane transporter activity, plant-type vacuole, vacuolar membrane
Prupe.3G081000	-3.64878	2.19402e-08	6352	---NA---	GO:0016020, GO:0016021, GO:0006807, GO:0016855, GO:0036361, GO:0006520, GO:0047661	membrane, integral component of membrane, nitrogen compound metabolic process, racemase and epimerase activity, acting on amino acids and derivatives, racemase activity, acting on amino acids and derivatives, cellular amino acid metabolic process, amino-acid racemase activity
Prupe.3G129600	-9.37948	2.21542e-08	1489	trans-resveratrol di-O-methyltransferase-like	GO:0046983, GO:0008168, GO:0016740, GO:0032259, GO:0008171, GO:0008757, GO:0019438	protein dimerization activity, methyltransferase activity, transferase activity, methylation, O-methyltransferase activity, S-adenosylmethionine-dependent methyltransferase activity, aromatic compound biosynthetic process
Prupe.1G538400	-2.6623	2.23138e-08	6826	probable rhamnogalacturonate lyase B	GO:0003824, GO:0005975, GO:0030246, GO:0016829, GO:0005576, GO:0102210	catalytic activity, carbohydrate metabolic process, carbohydrate binding, lyase activity, extracellular region, rhamnogalacturonan endolyase activity
Prupe.2G303400	2.09582	2.23374e-08	2259	---NA---	GO:0005886, GO:0016020	plasma membrane, membrane
Prupe.5G096900	-2.82025	2.2783e-08	4960	tyrosine--tRNA ligase 1, cytoplasmic	GO:0005524, GO:0000166, GO:0016874, GO:0006412, GO:0004812, GO:0006418, GO:0004831	ATP binding, nucleotide binding, ligase activity, translation, aminoacyl-tRNA ligase activity, tRNA aminoacylation for protein translation, tyrosine-tRNA ligase activity
Prupe.4G057800	2.06098	2.30171e-08	7297	---NA---	GO:0005524, GO:0000166, GO:0016301, GO:0016310, GO:0016020, GO:0016021, GO:0016740, GO:0004672, GO:0006468, GO:0005515, GO:0004674	ATP binding, nucleotide binding, kinase activity, phosphorylation, membrane, integral component of membrane, transferase activity, protein kinase activity, protein phosphorylation, protein binding, protein serine/threonine kinase activity
Prupe.5G004800	-7.50513	2.41017e-08	3550	cinnamoyl-CoA reductase 2	GO:0003824, GO:0055114, GO:0050662, GO:0016616	catalytic activity, oxidation-reduction process, obsolete coenzyme binding, oxidoreductase activity, acting on the CH-OH group of donors, NAD or NADP as acceptor
Prupe.6G164200	2.69108	2.41692e-08	2492	thioredoxin-like protein YLS8	GO:0008380, GO:0005634, GO:0000398, GO:0006397, GO:0046540, GO:0005682, GO:0005681	RNA splicing, nucleus, mRNA splicing, via spliceosome, mRNA processing, U4/U6 x U5 tri-snRNP complex, U5 snRNP, spliceosomal complex
Prupe.6G029000	-2.20319	2.42967e-08	4126	probable LRR receptor-like serine/threonine-protein kinase At4g26540	GO:0005524, GO:0000166, GO:0016301, GO:0016310, GO:0016020, GO:0016021, GO:0016740, GO:0004672, GO:0006468, GO:0004674, GO:0005886, GO:0005515	ATP binding, nucleotide binding, kinase activity, phosphorylation, membrane, integral component of membrane, transferase activity, protein kinase activity, protein phosphorylation, protein serine/threonine kinase activity, plasma membrane, protein binding
Prupe.3G167200	-3.08329	2.43603e-08	4319	probable xyloglucan glycosyltransferase 5	GO:0016020, GO:0016021, GO:0005794, GO:0016757	membrane, integral component of membrane, Golgi apparatus, transferase activity, transferring glycosyl groups
Prupe.1G269200	8.92455	2.43817e-08	3324	probable WRKY transcription factor 36	GO:0005634, GO:0003677, GO:0006355, GO:0003700, GO:0043565	nucleus, DNA binding, regulation of transcription, DNA-templated, DNA-binding transcription factor activity, sequence-specific DNA binding
Prupe.5G109900	3.28206	2.45496e-08	1236	uncharacterized LOC18777470	GO:0016020, GO:0016021	membrane, integral component of membrane
Prupe.6G215300	-2.30706	2.47868e-08	2999	uncharacterized protein At3g49720	GO:0016020, GO:0016021	membrane, integral component of membrane
Prupe.4G021100	-3.06167	2.48225e-08	2103	peroxidase 42	GO:0055114, GO:0016491, GO:0046872, GO:0005576, GO:0020037, GO:0004601, GO:0098869, GO:0006979, GO:0042744, GO:0009506, GO:0009505	oxidation-reduction process, oxidoreductase activity, metal ion binding, extracellular region, heme binding, peroxidase activity, cellular oxidant detoxification, response to oxidative stress, hydrogen peroxide catabolic process, plasmodesma, plant-type cell wall
Prupe.6G150100	-2.43929	2.5121e-08	1904	uncharacterized LOC18775602	GO:0005634, GO:0045739, GO:0070531, GO:0070552	nucleus, positive regulation of DNA repair, BRCA1-A complex, BRISC complex
Prupe.3G125000	3.92681	2.56448e-08	1142	E3 ubiquitin-protein ligase ATL41	GO:0016020, GO:0016021	membrane, integral component of membrane
Prupe.3G055800	6.13916	2.5926e-08	4698	probable LRR receptor-like serine/threonine-protein kinase At1g05700	GO:0005524, GO:0000166, GO:0016301, GO:0016310, GO:0016020, GO:0016021, GO:0016740, GO:0004672, GO:0006468, GO:0004674	ATP binding, nucleotide binding, kinase activity, phosphorylation, membrane, integral component of membrane, transferase activity, protein kinase activity, protein phosphorylation, protein serine/threonine kinase activity
Prupe.4G235800	6.07264	2.5926e-08	1999	cytochrome P450 CYP736A12	GO:0055114, GO:0016491, GO:0046872, GO:0004497, GO:0005506, GO:0016705, GO:0020037	oxidation-reduction process, oxidoreductase activity, metal ion binding, monooxygenase activity, iron ion binding, oxidoreductase activity, acting on paired donors, with incorporation or reduction of molecular oxygen, heme binding
Prupe.1G522800	2.9988	2.61545e-08	627	uncharacterized LOC18788339	#N/A	#N/A
Prupe.7G247800	-2.82085	2.69281e-08	4894	putative UDP-sugar transporter DDB_G0278631	GO:0016020, GO:0016021, GO:0055085, GO:0005794, GO:0015297, GO:0005461, GO:0005462, GO:0005463, GO:0015787, GO:0015789, GO:1990569	membrane, integral component of membrane, transmembrane transport, Golgi apparatus, antiporter activity, UDP-glucuronic acid transmembrane transporter activity, UDP-N-acetylglucosamine transmembrane transporter activity, UDP-N-acetylgalactosamine transmembrane transporter activity, UDP-glucuronic acid transmembrane transport, UDP-N-acetylgalactosamine transmembrane transport, UDP-N-acetylglucosam…
Prupe.3G164400	-3.63716	2.73465e-08	665	pleckstrin homology domain-containing protein 1	#N/A	#N/A
Prupe.6G239200	-2.30031	2.78104e-08	3923	MLO-like protein 3	GO:0005516, GO:0016020, GO:0016021, GO:0006952, GO:0009607	calmodulin binding, membrane, integral component of membrane, defense response, response to biotic stimulus
Prupe.2G048700	6.50579	2.80242e-08	2222	---NA---	GO:0005524, GO:0000166, GO:0016301, GO:0016310, GO:0016020, GO:0016021, GO:0016740, GO:0004672, GO:0006468, GO:0004674	ATP binding, nucleotide binding, kinase activity, phosphorylation, membrane, integral component of membrane, transferase activity, protein kinase activity, protein phosphorylation, protein serine/threonine kinase activity
Prupe.3G281700	8.15023	2.82714e-08	522	---NA---	#N/A	#N/A
Prupe.3G248200	-4.81706	2.88628e-08	4128	uncharacterized protein At1g04910	GO:0016020, GO:0016021, GO:0016740, GO:0006004, GO:0016757, GO:0005737	membrane, integral component of membrane, transferase activity, fucose metabolic process, transferase activity, transferring glycosyl groups, cytoplasm
Prupe.7G004400	2.4989	2.89299e-08	5887	adenylyl-sulfate kinase 3	GO:0005524, GO:0000166, GO:0016301, GO:0016310, GO:0016740, GO:0004020, GO:0000103, GO:0070814, GO:0005829	ATP binding, nucleotide binding, kinase activity, phosphorylation, transferase activity, adenylylsulfate kinase activity, sulfate assimilation, hydrogen sulfide biosynthetic process, cytosol
Prupe.5G178400	-5.4887	2.94045e-08	1357	snakin-2	#N/A	#N/A
Prupe.5G241700	-2.92097	2.97612e-08	4765	---NA---	GO:0016020, GO:0016021, GO:0016740, GO:0016757, GO:0016157, GO:0005985	membrane, integral component of membrane, transferase activity, transferase activity, transferring glycosyl groups, sucrose synthase activity, sucrose metabolic process
Prupe.3G185100	-7.51242	2.97942e-08	2131	UDP-glycosyltransferase 71A15	GO:0016740, GO:0016757, GO:0016758, GO:0008194	transferase activity, transferase activity, transferring glycosyl groups, transferase activity, transferring hexosyl groups, UDP-glycosyltransferase activity
Prupe.3G185800	2.50492	2.99079e-08	1260	VQ motif-containing protein 22	#N/A	#N/A
Prupe.3G210700	-3.10641	2.99079e-08	3083	glucan endo-1,3-beta-glucosidase 12	GO:0005975, GO:0016787, GO:0016798, GO:0008152, GO:0004553, GO:0042973, GO:0046658	carbohydrate metabolic process, hydrolase activity, hydrolase activity, acting on glycosyl bonds, metabolic process, hydrolase activity, hydrolyzing O-glycosyl compounds, glucan endo-1,3-beta-D-glucosidase activity, anchored component of plasma membrane
Prupe.8G024500	2.76933	3.04807e-08	1663	U-box domain-containing protein 28	GO:0004842, GO:0016567	ubiquitin-protein transferase activity, protein ubiquitination
Prupe.8G095400	-6.00364	3.05346e-08	2653	laccase-11	GO:0055114, GO:0016491, GO:0046872, GO:0005576, GO:0005507, GO:0052716, GO:0046274, GO:0048046	oxidation-reduction process, oxidoreductase activity, metal ion binding, extracellular region, copper ion binding, hydroquinone:oxygen oxidoreductase activity, lignin catabolic process, apoplast
Prupe.2G255300	-4.63516	3.07545e-08	2087	protein MID1-COMPLEMENTING ACTIVITY 2	GO:0007166	cell surface receptor signaling pathway
Prupe.8G231900	-3.55924	3.14439e-08	3091	phospholipase A1-Igamma1, chloroplastic	GO:0006629, GO:0016787, GO:0004620	lipid metabolic process, hydrolase activity, phospholipase activity
Prupe.4G272400	-2.91633	3.21107e-08	2231	---NA---	GO:0005524, GO:0000166, GO:0016020, GO:0016021, GO:0016887, GO:0042626, GO:0055085	ATP binding, nucleotide binding, membrane, integral component of membrane, ATPase activity, ATPase-coupled transmembrane transporter activity, transmembrane transport
Prupe.1G023500	-4.25659	3.26738e-08	3737	uncharacterized LOC18791786	#N/A	#N/A
Prupe.8G097000	-8.60221	3.30767e-08	2659	laccase-11	GO:0055114, GO:0016491, GO:0046872, GO:0005576, GO:0005507, GO:0052716, GO:0046274, GO:0048046	oxidation-reduction process, oxidoreductase activity, metal ion binding, extracellular region, copper ion binding, hydroquinone:oxygen oxidoreductase activity, lignin catabolic process, apoplast
Prupe.6G017000	-7.65831	3.32779e-08	2408	G-type lectin S-receptor-like serine/threonine-protein kinase RLK1	GO:0005524, GO:0000166, GO:0016301, GO:0016310, GO:0016020, GO:0016021, GO:0016740, GO:0004672, GO:0006468, GO:0004674, GO:0048544, GO:0106310, GO:0106311	ATP binding, nucleotide binding, kinase activity, phosphorylation, membrane, integral component of membrane, transferase activity, protein kinase activity, protein phosphorylation, protein serine/threonine kinase activity, recognition of pollen, ,
Prupe.3G010200	2.87028	3.36255e-08	1310	---NA---	GO:0007165, GO:0016787, GO:0043531, GO:0006952, GO:0005515, GO:0050135, GO:0061809	signal transduction, hydrolase activity, ADP binding, defense response, protein binding, NAD(P)+ nucleosidase activity, NAD+ nucleotidase, cyclic ADP-ribose generating
Prupe.3G055200	7.59822	3.47515e-08	6352	---NA---	GO:0005524, GO:0000166, GO:0016301, GO:0016310, GO:0016020, GO:0016021, GO:0016740, GO:0004672, GO:0006468, GO:0004674, GO:0005515	ATP binding, nucleotide binding, kinase activity, phosphorylation, membrane, integral component of membrane, transferase activity, protein kinase activity, protein phosphorylation, protein serine/threonine kinase activity, protein binding
Prupe.5G148500	-5.96316	3.47931e-08	3713	heavy metal-associated isoprenylated plant protein 7-like	GO:0046872, GO:0030001	metal ion binding, metal ion transport
Prupe.1G519700	-4.18179	3.51999e-08	2064	7-deoxyloganetin glucosyltransferase	GO:0016740, GO:0016758, GO:0008194, GO:0080043, GO:0080044	transferase activity, transferase activity, transferring hexosyl groups, UDP-glycosyltransferase activity, quercetin 3-O-glucosyltransferase activity, quercetin 7-O-glucosyltransferase activity
Prupe.3G134000	10.1233	3.68051e-08	2667	---NA---	GO:0016020, GO:0016021	membrane, integral component of membrane
Prupe.3G289900	2.52367	3.74622e-08	3669	probable galactinol--sucrose galactosyltransferase 5	GO:0005975, GO:0047274	carbohydrate metabolic process, galactinol-sucrose galactosyltransferase activity
Prupe.5G143500	-2.76828	3.75713e-08	3402	---NA---	GO:0016787, GO:0008233, GO:0006508, GO:0005576, GO:0004185, GO:0004180, GO:0005773	hydrolase activity, peptidase activity, proteolysis, extracellular region, serine-type carboxypeptidase activity, carboxypeptidase activity, vacuole
Prupe.1G545900	3.33588	3.84163e-08	4660	ankyrin repeat-containing protein NPR4	GO:0016020, GO:0016021, GO:0005515	membrane, integral component of membrane, protein binding
Prupe.3G175800	-4.94292	3.85229e-08	7242	uncharacterized LOC18783108	GO:0007165, GO:0000166, GO:0005524, GO:0016301, GO:0016310, GO:0016740, GO:0043531, GO:0004143	signal transduction, nucleotide binding, ATP binding, kinase activity, phosphorylation, transferase activity, ADP binding, diacylglycerol kinase activity
Prupe.4G263700	-3.3849	3.89301e-08	11144	cyclic nucleotide-gated ion channel 1-like	GO:0016020, GO:0016021	membrane, integral component of membrane
Prupe.1G126200	-4.36599	3.89563e-08	1263	sulfated surface glycoprotein 185	#N/A	#N/A
Prupe.6G084700	2.13316	4.04887e-08	3996	protein UPSTREAM OF FLC	#N/A	#N/A
Prupe.6G114600	-2.64348	4.05626e-08	6056	serine carboxypeptidase-like 51	GO:0016787, GO:0008233, GO:0006508, GO:0005576, GO:0004185, GO:0004180	hydrolase activity, peptidase activity, proteolysis, extracellular region, serine-type carboxypeptidase activity, carboxypeptidase activity
Prupe.8G023600	9.18191	4.12986e-08	3328	TMV resistance protein N	GO:0007165, GO:0016787, GO:0043531, GO:0050135, GO:0061809	signal transduction, hydrolase activity, ADP binding, NAD(P)+ nucleosidase activity, NAD+ nucleotidase, cyclic ADP-ribose generating
Prupe.1G110700	-2.62016	4.33436e-08	4633	hydroxyproline O-galactosyltransferase GALT3	GO:0005794, GO:0016020, GO:0016021, GO:0016740, GO:0030246, GO:0016757, GO:0006486, GO:0000139, GO:0008378	Golgi apparatus, membrane, integral component of membrane, transferase activity, carbohydrate binding, transferase activity, transferring glycosyl groups, protein glycosylation, Golgi membrane, galactosyltransferase activity
Prupe.8G266500	-3.1224	4.38527e-08	2142	protein trichome birefringence-like 6	GO:0016020, GO:0016021, GO:0016413, GO:0005794	membrane, integral component of membrane, O-acetyltransferase activity, Golgi apparatus
Prupe.1G388700	-3.42037	4.46015e-08	3462	lysine histidine transporter-like 8	GO:0016020, GO:0016021, GO:0009734, GO:0055085, GO:0005886, GO:0015293, GO:0006865	membrane, integral component of membrane, auxin-activated signaling pathway, transmembrane transport, plasma membrane, symporter activity, amino acid transport
Prupe.6G347000	2.81006	4.56361e-08	380	---NA---	GO:0051091	positive regulation of DNA-binding transcription factor activity
Prupe.2G121500	2.91265	4.58925e-08	1422	uncharacterized LOC18785006	GO:0016020, GO:0016021	membrane, integral component of membrane
Prupe.1G095900	2.09847	4.59086e-08	3115	uncharacterized LOC18791906	GO:0016020, GO:0016021	membrane, integral component of membrane
Prupe.4G089200	-2.06885	4.71296e-08	18416	---NA---	GO:0005515, GO:0005886, GO:0009506	protein binding, plasma membrane, plasmodesma
Prupe.7G138500	-2.34295	4.81664e-08	3621	probable disease resistance protein At5g66900	GO:0043531	ADP binding
Prupe.3G035700	-2.77866	4.92681e-08	2016	dormancy-associated protein homolog 4	#N/A	#N/A
Prupe.1G323100	-9.06661	5.13903e-08	2415	heavy metal-associated isoprenylated plant protein 37	GO:0046872, GO:0030001	metal ion binding, metal ion transport
Prupe.3G133000	-7.4753	5.39283e-08	3720	probable aminotransferase TAT2	GO:0003824, GO:0009058, GO:0008483, GO:0030170, GO:0006520	catalytic activity, biosynthetic process, transaminase activity, pyridoxal phosphate binding, cellular amino acid metabolic process
Prupe.5G094300	8.57043	5.41388e-08	368	---NA---	GO:0006952, GO:0005576	defense response, extracellular region
Prupe.3G103900	-5.56151	5.52095e-08	2698	aspartyl protease family protein At5g10770	GO:0004190, GO:0006508	aspartic-type endopeptidase activity, proteolysis
Prupe.8G045400	-7.36058	5.81929e-08	2543	---NA---	GO:0005524, GO:0000166, GO:0016874, GO:0005737, GO:0006412, GO:0004812, GO:0006418, GO:0043039, GO:0005829, GO:0004819, GO:0006425	ATP binding, nucleotide binding, ligase activity, cytoplasm, translation, aminoacyl-tRNA ligase activity, tRNA aminoacylation for protein translation, tRNA aminoacylation, cytosol, glutamine-tRNA ligase activity, glutaminyl-tRNA aminoacylation
Prupe.6G068300	-4.65364	5.91773e-08	290	---NA---	#N/A	#N/A
Prupe.3G002300	3.76218	6.09785e-08	3449	probable WRKY transcription factor 47	GO:0005634, GO:0003677, GO:0006355, GO:0003700, GO:0043565	nucleus, DNA binding, regulation of transcription, DNA-templated, DNA-binding transcription factor activity, sequence-specific DNA binding
Prupe.1G369800	7.25204	6.09821e-08	1954	aldehyde oxidase GLOX1	#N/A	#N/A
Prupe.1G524000	2.17854	6.1397e-08	3991	TMV resistance protein N	GO:0007165, GO:0016787, GO:0043531, GO:0006952, GO:0005515, GO:0050135, GO:0061809	signal transduction, hydrolase activity, ADP binding, defense response, protein binding, NAD(P)+ nucleosidase activity, NAD+ nucleotidase, cyclic ADP-ribose generating
Prupe.3G009200	-3.08778	6.27377e-08	2289	---NA---	GO:0005634, GO:0000398, GO:0003676	nucleus, mRNA splicing, via spliceosome, nucleic acid binding
Prupe.1G572400	-3.34598	6.44373e-08	3926	nucleolar GTP-binding protein 1	GO:0005634, GO:0005730, GO:0000166, GO:0005525, GO:0042254	nucleus, nucleolus, nucleotide binding, GTP binding, ribosome biogenesis
Prupe.3G298600	2.64914	6.52107e-08	1167	---NA---	#N/A	#N/A
Prupe.7G179100	2.25427	6.58107e-08	2789	protein STRICTOSIDINE SYNTHASE-LIKE 5	GO:0016020, GO:0016021, GO:0009058, GO:0005773, GO:0016844	membrane, integral component of membrane, biosynthetic process, vacuole, strictosidine synthase activity
Prupe.3G184100	-4.25225	6.66614e-08	2242	sulfated surface glycoprotein 185	GO:0046658	anchored component of plasma membrane
Prupe.3G015700	2.13758	6.68706e-08	1126	---NA---	#N/A	#N/A
Prupe.1G587600	-4.60874	6.81727e-08	1669	PCTP-like protein	GO:0008289	lipid binding
Prupe.6G329100	-3.87377	6.89619e-08	2820	heavy metal-associated isoprenylated plant protein 34	GO:0046872, GO:0030001, GO:0009506	metal ion binding, metal ion transport, plasmodesma
Prupe.6G185400	4.85253	7.03561e-08	503	---NA---	GO:0016020, GO:0016021, GO:0005886	membrane, integral component of membrane, plasma membrane
Prupe.1G533000	-8.78431	7.15356e-08	2631	protein ECERIFERUM 1	GO:0016747	transferase activity, transferring acyl groups other than amino-acyl groups
Prupe.2G264300	-3.49868	7.23153e-08	4609	probable LRR receptor-like serine/threonine-protein kinase IRK	GO:0005524, GO:0016020, GO:0016021, GO:0004672, GO:0006468, GO:0005886, GO:0005515, GO:0048364, GO:0051302	ATP binding, membrane, integral component of membrane, protein kinase activity, protein phosphorylation, plasma membrane, protein binding, root development, regulation of cell division
Prupe.1G302500	-2.28173	7.46378e-08	4260	ABC transporter G family member 21	GO:0005524, GO:0000166, GO:0016020, GO:0016021, GO:0016887, GO:0042626, GO:0055085	ATP binding, nucleotide binding, membrane, integral component of membrane, ATPase activity, ATPase-coupled transmembrane transporter activity, transmembrane transport
Prupe.7G069000	-3.13604	7.77701e-08	4868	probably inactive leucine-rich repeat receptor-like protein kinase At5g06940	GO:0005524, GO:0016020, GO:0016021, GO:0004672, GO:0006468, GO:0005886, GO:0005515	ATP binding, membrane, integral component of membrane, protein kinase activity, protein phosphorylation, plasma membrane, protein binding
Prupe.7G243800	3.27003	7.91622e-08	3623	phospholipase D alpha 1	GO:0003824, GO:0016787, GO:0005509, GO:0016020, GO:0004630, GO:0070290, GO:0016042, GO:0046470, GO:0005886, GO:0009395	catalytic activity, hydrolase activity, calcium ion binding, membrane, phospholipase D activity, N-acylphosphatidylethanolamine-specific phospholipase D activity, lipid catabolic process, phosphatidylcholine metabolic process, plasma membrane, phospholipid catabolic process
Prupe.2G033800	-2.49403	8.0186e-08	407	---NA---	#N/A	#N/A
Prupe.1G507800	2.55465	8.06119e-08	3113	RHOMBOID-like protein 8	GO:0016787, GO:0016020, GO:0016021, GO:0008233, GO:0006508, GO:0004252	hydrolase activity, membrane, integral component of membrane, peptidase activity, proteolysis, serine-type endopeptidase activity
Prupe.3G120900	7.38037	8.20297e-08	1427	---NA---	GO:0016787, GO:0008233, GO:0006508, GO:0008234	hydrolase activity, peptidase activity, proteolysis, cysteine-type peptidase activity
Prupe.6G064600	-2.73226	8.2166e-08	1074	uncharacterized LOC18773950	GO:0016020, GO:0016021	membrane, integral component of membrane
Prupe.2G029200	-2.40324	8.34154e-08	5964	probable disease resistance protein At4g27220	GO:0043531	ADP binding
Prupe.1G475900	-6.74261	8.35105e-08	1420	BURP domain protein RD22	#N/A	#N/A
Prupe.6G354100	-26.0044	8.39511e-08	2723	GDSL esterase/lipase LTL1	GO:0016788, GO:0010226, GO:0042538, GO:0009751	hydrolase activity, acting on ester bonds, response to lithium ion, hyperosmotic salinity response, response to salicylic acid
Prupe.1G575200	5.61307	8.52471e-08	2984	LRR receptor-like serine/threonine-protein kinase GSO1	GO:0016020, GO:0016021, GO:0005515	membrane, integral component of membrane, protein binding
Prupe.6G298600	-7.82672	8.58252e-08	2302	cytochrome P450 714A1	GO:0055114, GO:0016491, GO:0016020, GO:0016021, GO:0046872, GO:0004497, GO:0005506, GO:0016705, GO:0020037	oxidation-reduction process, oxidoreductase activity, membrane, integral component of membrane, metal ion binding, monooxygenase activity, iron ion binding, oxidoreductase activity, acting on paired donors, with incorporation or reduction of molecular oxygen, heme binding
Prupe.1G221300	-3.80959	8.61045e-08	1339	auxin-responsive protein SAUR32	GO:0009733	response to auxin
Prupe.2G265000	2.35576	8.64574e-08	2542	probable WRKY transcription factor 70	GO:0005634, GO:0003677, GO:0006355, GO:0003700, GO:0043565	nucleus, DNA binding, regulation of transcription, DNA-templated, DNA-binding transcription factor activity, sequence-specific DNA binding
Prupe.8G011900	5.19383	8.81135e-08	4027	probable disease resistance protein At5g47250	GO:0043531	ADP binding
Prupe.4G065600	-3.31856	8.98174e-08	1215	---NA---	GO:0016020, GO:0016021	membrane, integral component of membrane
Prupe.2G212900	-2.59421	9.50473e-08	3437	GATA transcription factor 8	GO:0005634, GO:0003677, GO:0046872, GO:0008270, GO:0006355, GO:0043565, GO:0045893, GO:0003700, GO:0030154, GO:0007623, GO:0009845	nucleus, DNA binding, metal ion binding, zinc ion binding, regulation of transcription, DNA-templated, sequence-specific DNA binding, positive regulation of transcription, DNA-templated, DNA-binding transcription factor activity, cell differentiation, circadian rhythm, seed germination
Prupe.2G064600	-4.44478	9.52489e-08	2452	histone-lysine N-methyltransferase, H3 lysine-9 specific SUVH5	GO:0005634, GO:0008270, GO:0018024, GO:0034968, GO:0005694, GO:0005515	nucleus, zinc ion binding, histone-lysine N-methyltransferase activity, histone lysine methylation, chromosome, protein binding
Prupe.6G064300	3.05962	9.6353e-08	2486	uncharacterized LOC18775593	#N/A	#N/A
Prupe.5G122400	-4.17575	9.75841e-08	2601	E3 ubiquitin-protein ligase SINAT3	GO:0016020, GO:0016021, GO:0016740, GO:0007275, GO:0008270, GO:0005737, GO:0006511, GO:0016567, GO:0005634, GO:0061630, GO:0005515	membrane, integral component of membrane, transferase activity, multicellular organism development, zinc ion binding, cytoplasm, ubiquitin-dependent protein catabolic process, protein ubiquitination, nucleus, ubiquitin protein ligase activity, protein binding
Prupe.8G061300	-7.38227	9.91061e-08	611	---NA---	GO:0015031, GO:0008104	protein transport, protein localization
Prupe.4G280800	-2.63942	9.95986e-08	833	protein DOG1-like 4	GO:0006351, GO:0043565	transcription, DNA-templated, sequence-specific DNA binding
Prupe.6G333400	7.25736	1.0078e-07	6166	protein BONZAI 3	GO:0005544, GO:0060548, GO:0005886, GO:0071277	calcium-dependent phospholipid binding, negative regulation of cell death, plasma membrane, cellular response to calcium ion
Prupe.6G275000	-2.07241	1.01286e-07	2828	---NA---	#N/A	#N/A
Prupe.6G207900	6.62865	1.01698e-07	4888	probable mannitol dehydrogenase	GO:0055114, GO:0016491, GO:0046872, GO:0008270, GO:0016616, GO:0045551, GO:0009809	oxidation-reduction process, oxidoreductase activity, metal ion binding, zinc ion binding, oxidoreductase activity, acting on the CH-OH group of donors, NAD or NADP as acceptor, cinnamyl-alcohol dehydrogenase activity, lignin biosynthetic process
Prupe.3G181200	2.91628	1.02017e-07	3351	wall-associated receptor kinase-like 1	GO:0005524, GO:0016020, GO:0016021, GO:0005509, GO:0004672, GO:0006468, GO:0030247, GO:0005886, GO:0004674, GO:0007166	ATP binding, membrane, integral component of membrane, calcium ion binding, protein kinase activity, protein phosphorylation, polysaccharide binding, plasma membrane, protein serine/threonine kinase activity, cell surface receptor signaling pathway
Prupe.1G041200	2.53338	1.03109e-07	2703	putative protein phosphatase 2C-like protein 44	GO:0016791, GO:0016311, GO:0004722, GO:0005634, GO:0005829, GO:0006470	phosphatase activity, dephosphorylation, protein serine/threonine phosphatase activity, nucleus, cytosol, protein dephosphorylation
Prupe.1G372800	-3.80281	1.03511e-07	6307	beta-galactosidase 5	GO:0005975, GO:0016787, GO:0030246, GO:0016798, GO:0008152, GO:0005576, GO:0004553, GO:0004565, GO:0048046, GO:0005773, GO:0005618, GO:0009505	carbohydrate metabolic process, hydrolase activity, carbohydrate binding, hydrolase activity, acting on glycosyl bonds, metabolic process, extracellular region, hydrolase activity, hydrolyzing O-glycosyl compounds, beta-galactosidase activity, apoplast, vacuole, cell wall, plant-type cell wall
Prupe.3G314300	-2.13196	1.10944e-07	2492	nodulation receptor kinase	GO:0005524, GO:0000166, GO:0016301, GO:0016310, GO:0016020, GO:0016021, GO:0016740, GO:0004672, GO:0006468, GO:0004674, GO:0005886	ATP binding, nucleotide binding, kinase activity, phosphorylation, membrane, integral component of membrane, transferase activity, protein kinase activity, protein phosphorylation, protein serine/threonine kinase activity, plasma membrane
Prupe.8G031400	-4.43926	1.12712e-07	2656	early nodulin-20	GO:0016020, GO:0016021	membrane, integral component of membrane
Prupe.3G141400	-2.77157	1.12968e-07	2845	G-type lectin S-receptor-like serine/threonine-protein kinase At2g19130	GO:0005524, GO:0000166, GO:0016301, GO:0016310, GO:0016020, GO:0016021, GO:0016740, GO:0004672, GO:0006468, GO:0004674, GO:0048544, GO:0106310, GO:0106311	ATP binding, nucleotide binding, kinase activity, phosphorylation, membrane, integral component of membrane, transferase activity, protein kinase activity, protein phosphorylation, protein serine/threonine kinase activity, recognition of pollen, ,
Prupe.7G119400	3.07437	1.1333e-07	1950	uncharacterized LOC18769751	GO:0006470, GO:0004721	protein dephosphorylation, phosphoprotein phosphatase activity
Prupe.3G036600	2.24863	1.1546e-07	1101	---NA---	GO:0016020, GO:0016021	membrane, integral component of membrane
Prupe.7G217200	-5.1978	1.15682e-07	1664	leucine-rich repeat extensin-like protein 4	GO:0005515	protein binding
Prupe.4G027700	2.4281	1.23097e-07	3427	---NA---	GO:0005524, GO:0000166, GO:0016301, GO:0016310, GO:0016020, GO:0016021, GO:0016740, GO:0004672, GO:0006468, GO:0004674, GO:0042742, GO:0005886	ATP binding, nucleotide binding, kinase activity, phosphorylation, membrane, integral component of membrane, transferase activity, protein kinase activity, protein phosphorylation, protein serine/threonine kinase activity, defense response to bacterium, plasma membrane
Prupe.6G301200	-2.63095	1.24697e-07	5618	---NA---	GO:0005524, GO:0000166, GO:0016301, GO:0016310, GO:0016020, GO:0016021, GO:0016740, GO:0004672, GO:0006468, GO:0004674	ATP binding, nucleotide binding, kinase activity, phosphorylation, membrane, integral component of membrane, transferase activity, protein kinase activity, protein phosphorylation, protein serine/threonine kinase activity
Prupe.7G130600	-4.42796	1.25212e-07	1690	uncharacterized acetyltransferase At3g50280	GO:0016747	transferase activity, transferring acyl groups other than amino-acyl groups
Prupe.8G131400	-4.04336	1.2561e-07	1714	uncharacterized protein At4g06744	#N/A	#N/A
Prupe.4G262400	2.63641	1.27776e-07	3647	---NA---	GO:0016020, GO:0016021	membrane, integral component of membrane
Prupe.4G092400	-4.75497	1.28279e-07	2346	---NA---	GO:0006508, GO:0008234	proteolysis, cysteine-type peptidase activity
Prupe.1G120000	4.57419	1.31069e-07	652	---NA---	#N/A	#N/A
Prupe.4G149800	4.02014	1.33882e-07	3151	disease resistance protein RPM1	GO:0043531	ADP binding
Prupe.3G082100	4.58843	1.3398e-07	1873	metallothiol transferase FosB	#N/A	#N/A
Prupe.3G133100	-2.86224	1.36553e-07	3963	---NA---	GO:0003824, GO:0009058, GO:0008483, GO:0030170, GO:0006520	catalytic activity, biosynthetic process, transaminase activity, pyridoxal phosphate binding, cellular amino acid metabolic process
Prupe.1G312500	8.96791	1.41148e-07	1204	VQ motif-containing protein 20-like	GO:0005634	nucleus
Prupe.6G339700	-3.30761	1.41551e-07	992	uncharacterized LOC18775124	#N/A	#N/A
Prupe.1G524500	-5.45948	1.42524e-07	2257	transcription factor bHLH94	GO:0005634, GO:0046983, GO:0000981, GO:0000785, GO:0006357, GO:0000978	nucleus, protein dimerization activity, DNA-binding transcription factor activity, RNA polymerase II-specific, chromatin, regulation of transcription by RNA polymerase II, RNA polymerase II cis-regulatory region sequence-specific DNA binding
Prupe.1G032500	7.81693	1.44369e-07	1085	---NA---	GO:0004867, GO:0009611, GO:0010951, GO:0030414, GO:0010466	serine-type endopeptidase inhibitor activity, response to wounding, negative regulation of endopeptidase activity, peptidase inhibitor activity, negative regulation of peptidase activity
Prupe.5G137200	-2.76821	1.45814e-07	1701	RING-H2 finger protein ATL79	GO:0016020, GO:0016021	membrane, integral component of membrane
Prupe.1G036700	3.2673	1.47054e-07	1926	1-aminocyclopropane-1-carboxylate oxidase homolog 1	GO:0055114, GO:0016491, GO:0046872	oxidation-reduction process, oxidoreductase activity, metal ion binding
Prupe.1G253700	-4.88256	1.53205e-07	2644	polygalacturonase 1 beta-like protein 3	#N/A	#N/A
Prupe.4G156500	-2.0074	1.55613e-07	5082	E3 ubiquitin-protein ligase CCNB1IP1 homolog	, GO:0051026, GO:0007165, GO:0006355	, chiasma assembly, signal transduction, regulation of transcription, DNA-templated
Prupe.2G050300	-4.21788	1.57652e-07	3989	protein CDI-like	#N/A	#N/A
Prupe.1G018600	3.54058	1.62484e-07	1576	---NA---	GO:0007165, GO:0016787, GO:0043531, GO:0006952, GO:0050135, GO:0061809	signal transduction, hydrolase activity, ADP binding, defense response, NAD(P)+ nucleosidase activity, NAD+ nucleotidase, cyclic ADP-ribose generating
Prupe.1G500600	5.334	1.72522e-07	2741	WAT1-related protein At4g08290	GO:0016020, GO:0016021, GO:0022857, GO:0055085, GO:0005886	membrane, integral component of membrane, transmembrane transporter activity, transmembrane transport, plasma membrane
Prupe.1G511200	4.09875	1.77736e-07	1464	heavy metal-associated isoprenylated plant protein 24	GO:0046872, GO:0030001	metal ion binding, metal ion transport
Prupe.2G294400	-2.4393	1.78574e-07	3372	low-temperature-induced 65 kDa protein	GO:0009737	response to abscisic acid
Prupe.3G120400	-6.96109	1.78574e-07	1977	trans-resveratrol di-O-methyltransferase-like	GO:0046983, GO:0008168, GO:0016740, GO:0032259, GO:0008171, GO:0008757, GO:0019438	protein dimerization activity, methyltransferase activity, transferase activity, methylation, O-methyltransferase activity, S-adenosylmethionine-dependent methyltransferase activity, aromatic compound biosynthetic process
Prupe.6G102500	7.33266	1.80342e-07	2153	39S ribosomal protein L41-A, mitochondrial	GO:0005739, GO:0005840, GO:0003735, GO:0006412, GO:0005762	mitochondrion, ribosome, structural constituent of ribosome, translation, mitochondrial large ribosomal subunit
Prupe.6G190400	4.6287	1.82281e-07	3146	---NA---	#N/A	#N/A
Prupe.1G387000	6.04014	1.84493e-07	2081	cytochrome P450 CYP82D47	GO:0055114, GO:0016491, GO:0016020, GO:0016021, GO:0046872, GO:0004497, GO:0005506, GO:0016705, GO:0020037, GO:0098542	oxidation-reduction process, oxidoreductase activity, membrane, integral component of membrane, metal ion binding, monooxygenase activity, iron ion binding, oxidoreductase activity, acting on paired donors, with incorporation or reduction of molecular oxygen, heme binding, defense response to other organism
Prupe.3G309900	-6.26555	1.88908e-07	651	uncharacterized LOC18784150	#N/A	#N/A
Prupe.8G210500	4.65716	1.91524e-07	1310	probable glutathione S-transferase	GO:0006749, GO:0005737, GO:0004364, GO:0005515	glutathione metabolic process, cytoplasm, glutathione transferase activity, protein binding
Prupe.3G145600	-6.93822	1.94659e-07	3909	---NA---	GO:0005524, GO:0000166, GO:0016301, GO:0016310, GO:0016020, GO:0016021, GO:0016740, GO:0004672, GO:0006468, GO:0004674, GO:0030247	ATP binding, nucleotide binding, kinase activity, phosphorylation, membrane, integral component of membrane, transferase activity, protein kinase activity, protein phosphorylation, protein serine/threonine kinase activity, polysaccharide binding
Prupe.4G214900	-2.45095	1.95341e-07	2999	uncharacterized LOC18781129	#N/A	#N/A
Prupe.7G146300	-3.85729	1.9968e-07	5386	STS14 protein	GO:0005615	extracellular space
Prupe.8G150700	-4.09056	2.00094e-07	7356	---NA---	GO:0016740, GO:0016757, GO:0016758, GO:0008194, GO:0080043, GO:0080044	transferase activity, transferase activity, transferring glycosyl groups, transferase activity, transferring hexosyl groups, UDP-glycosyltransferase activity, quercetin 3-O-glucosyltransferase activity, quercetin 7-O-glucosyltransferase activity
Prupe.1G356000	4.41199	2.07339e-07	2459	lysine histidine transporter-like 8	GO:0016020, GO:0016021, GO:0009734, GO:0055085, GO:0005886, GO:0015293, GO:0006865	membrane, integral component of membrane, auxin-activated signaling pathway, transmembrane transport, plasma membrane, symporter activity, amino acid transport
Prupe.6G225300	-4.11826	2.07626e-07	1897	lysine-rich arabinogalactan protein 18	#N/A	#N/A
Prupe.2G080400	-7.32385	2.08568e-07	1086	---NA---	GO:0016554, GO:0003676, GO:0003723, GO:0006397, GO:0005739, GO:0080156	cytidine to uridine editing, nucleic acid binding, RNA binding, mRNA processing, mitochondrion, mitochondrial mRNA modification
Prupe.8G008800	4.31353	2.09193e-07	1206	succinate dehydrogenase assembly factor 1, mitochondrial	GO:0005739, GO:0034553	mitochondrion, mitochondrial respiratory chain complex II assembly
Prupe.4G284500	-4.38955	2.11223e-07	2062	---NA---	GO:0005515	protein binding
Prupe.1G357500	2.68714	2.17147e-07	5179	prolyl endopeptidase	GO:0016787, GO:0006508, GO:0004252, GO:0008236, GO:0070008, GO:0005829, GO:0004175, GO:0070012	hydrolase activity, proteolysis, serine-type endopeptidase activity, serine-type peptidase activity, serine-type exopeptidase activity, cytosol, endopeptidase activity, oligopeptidase activity
Prupe.4G169600	3.45847	2.17721e-07	2352	tyrosine-sulfated glycopeptide receptor 1	GO:0016020, GO:0016021, GO:0005515	membrane, integral component of membrane, protein binding
Prupe.1G405000	-2.01027	2.18016e-07	4925	trihelix transcription factor GTL2	#N/A	#N/A
Prupe.1G419600	-3.40811	2.18016e-07	5669	kinesin-like protein KIN-7N	GO:0005524, GO:0000166, GO:0003774, GO:0003777, GO:0008017, GO:0007018, GO:0005874	ATP binding, nucleotide binding, motor activity, microtubule motor activity, microtubule binding, microtubule-based movement, microtubule
Prupe.2G036500	-3.21606	2.20124e-07	3024	protein LATERAL ROOT PRIMORDIUM 1	GO:0005634, GO:0009734, GO:0007275, GO:0009851, GO:0003677, GO:0045893	nucleus, auxin-activated signaling pathway, multicellular organism development, auxin biosynthetic process, DNA binding, positive regulation of transcription, DNA-templated
Prupe.5G130600	-3.45147	2.24458e-07	2299	transcription factor MYC3	GO:0005634, GO:0046983, GO:0003700, GO:0000976, GO:0006355	nucleus, protein dimerization activity, DNA-binding transcription factor activity, transcription regulatory region sequence-specific DNA binding, regulation of transcription, DNA-templated
Prupe.7G037600	6.46811	2.2643e-07	7016	---NA---	GO:0007165, GO:0016787, GO:0043531, GO:0006952, GO:0005515, GO:0050135, GO:0061809	signal transduction, hydrolase activity, ADP binding, defense response, protein binding, NAD(P)+ nucleosidase activity, NAD+ nucleotidase, cyclic ADP-ribose generating
Prupe.1G287400	5.69855	2.27075e-07	1566	auxin-responsive protein IAA21-like	GO:0005634, GO:0016020, GO:0016021, GO:0009734, GO:0006355, GO:0006351	nucleus, membrane, integral component of membrane, auxin-activated signaling pathway, regulation of transcription, DNA-templated, transcription, DNA-templated
Prupe.3G035000	-2.62397	2.2783e-07	767	auxin-responsive protein SAUR50	GO:0009733	response to auxin
Prupe.4G283500	2.61213	2.35417e-07	2443	---NA---	GO:0055085, GO:0016020, GO:0016021, GO:1902600, GO:0006812, GO:0015299, GO:0012505, GO:0006885, GO:0015672	transmembrane transport, membrane, integral component of membrane, proton transmembrane transport, cation transport, solute:proton antiporter activity, endomembrane system, regulation of pH, monovalent inorganic cation transport
Prupe.1G330600	-2.49484	2.36609e-07	2052	HMG-Y-related protein B	GO:0003677, GO:0005634, GO:0006355, GO:0000786, GO:0006334, GO:0000785, GO:0005730, GO:0003690, GO:0045910, GO:0031492, GO:0016584, GO:0030261, GO:0031936	DNA binding, nucleus, regulation of transcription, DNA-templated, nucleosome, nucleosome assembly, chromatin, nucleolus, double-stranded DNA binding, negative regulation of DNA recombination, nucleosomal DNA binding, nucleosome positioning, chromosome condensation, negative regulation of chromatin silencing
Prupe.7G167300	7.01262	2.36609e-07	3118	---NA---	GO:0005975, GO:0016787, GO:0016020, GO:0016021, GO:0016798, GO:0008152, GO:0004553, GO:0008810, GO:0000272, GO:0030245	carbohydrate metabolic process, hydrolase activity, membrane, integral component of membrane, hydrolase activity, acting on glycosyl bonds, metabolic process, hydrolase activity, hydrolyzing O-glycosyl compounds, cellulase activity, polysaccharide catabolic process, cellulose catabolic process
Prupe.3G055000	-4.25092	2.38233e-07	3294	inositol oxygenase 1	GO:0005737, GO:0055114, GO:0016491, GO:0046872, GO:0005506, GO:0050113, GO:0019310, GO:0019853	cytoplasm, oxidation-reduction process, oxidoreductase activity, metal ion binding, iron ion binding, inositol oxygenase activity, inositol catabolic process, L-ascorbic acid biosynthetic process
Prupe.2G059500	-3.53868	2.39105e-07	2413	---NA---	#N/A	#N/A
Prupe.1G400600	2.73198	2.45733e-07	4268	glutamate receptor 2.8	GO:0016020, GO:0016021, GO:0006811, GO:0034220, GO:0007186, GO:0004930, GO:0004970, GO:0015276, GO:0005886, GO:0038023	membrane, integral component of membrane, ion transport, ion transmembrane transport, G protein-coupled receptor signaling pathway, G protein-coupled receptor activity, ionotropic glutamate receptor activity, ligand-gated ion channel activity, plasma membrane, signaling receptor activity
Prupe.3G012100	2.87298	2.46162e-07	4780	cysteine-rich receptor-like protein kinase 2	GO:0005524, GO:0000166, GO:0016301, GO:0016310, GO:0016020, GO:0016021, GO:0016740, GO:0004672, GO:0006468, GO:0005886, GO:0004674, GO:0046777	ATP binding, nucleotide binding, kinase activity, phosphorylation, membrane, integral component of membrane, transferase activity, protein kinase activity, protein phosphorylation, plasma membrane, protein serine/threonine kinase activity, protein autophosphorylation
Prupe.5G004400	4.52399	2.51026e-07	931	uncharacterized LOC18776937	GO:0016020, GO:0016021	membrane, integral component of membrane
Prupe.1G246700	-2.93122	2.5964e-07	2744	---NA---	GO:0016788	hydrolase activity, acting on ester bonds
Prupe.8G179300	-2.35744	2.61836e-07	1446	protein EXORDIUM-like 5	GO:0005615	extracellular space
Prupe.7G132700	2.53208	2.62543e-07	2572	uncharacterized LOC18771447	GO:0006629, GO:0016787	lipid metabolic process, hydrolase activity
Prupe.2G305200	4.30837	2.64051e-07	1384	acidic endochitinase	GO:0005975, GO:0016787, GO:0016798, GO:0008152, GO:0004553, GO:0005576, GO:0004568	carbohydrate metabolic process, hydrolase activity, hydrolase activity, acting on glycosyl bonds, metabolic process, hydrolase activity, hydrolyzing O-glycosyl compounds, extracellular region, chitinase activity
Prupe.2G009800	-7.17675	2.6752e-07	1412	DNA damage-repair/toleration protein DRT100	GO:0005515	protein binding
Prupe.3G026400	-7.5288	2.70305e-07	3227	---NA---	GO:0016853, GO:0016866, GO:0005811, GO:0000250, GO:0042300, GO:0016104	isomerase activity, intramolecular transferase activity, lipid droplet, lanosterol synthase activity, beta-amyrin synthase activity, triterpenoid biosynthetic process
Prupe.8G028000	7.48877	2.7757e-07	2608	---NA---	GO:0055114, GO:0016020, GO:0005739, GO:0005743, GO:0008121, GO:0006122, GO:0070469, GO:0009060, GO:0005750	oxidation-reduction process, membrane, mitochondrion, mitochondrial inner membrane, ubiquinol-cytochrome-c reductase activity, mitochondrial electron transport, ubiquinol to cytochrome c, respirasome, aerobic respiration, mitochondrial respiratory chain complex III
Prupe.1G512500	-3.49186	2.77672e-07	4819	2,3-bisphosphoglycerate-dependent phosphoglycerate mutase	GO:0003824, GO:0016853, GO:0006096, GO:0004619, GO:0016868	catalytic activity, isomerase activity, glycolytic process, phosphoglycerate mutase activity, intramolecular transferase activity, phosphotransferases
Prupe.3G260000	-6.75743	2.82475e-07	1742	UDP-glycosyltransferase 708C1	GO:0016740, GO:0016757, GO:0016758, GO:0008194, GO:0043231	transferase activity, transferase activity, transferring glycosyl groups, transferase activity, transferring hexosyl groups, UDP-glycosyltransferase activity, intracellular membrane-bounded organelle
Prupe.8G103900	-4.72401	2.84361e-07	3105	pre-mRNA-splicing factor ATP-dependent RNA helicase DEAH1	GO:0000166, GO:0005524, GO:0016787, GO:0004386, GO:0003724, GO:0003723	nucleotide binding, ATP binding, hydrolase activity, helicase activity, RNA helicase activity, RNA binding
Prupe.7G106800	7.06763	2.84371e-07	1112	uncharacterized LOC18769929	GO:0005509, GO:0016020, GO:0016021	calcium ion binding, membrane, integral component of membrane
Prupe.1G072100	8.31604	2.90977e-07	3179	plant intracellular Ras-group-related LRR protein 6	GO:0005515	protein binding
Prupe.3G261600	-3.56088	2.91868e-07	1768	lamin-like protein	GO:0016020, GO:0016021, GO:0009055, GO:0022900, GO:0046658	membrane, integral component of membrane, electron transfer activity, electron transport chain, anchored component of plasma membrane
Prupe.5G189300	6.97974	2.92741e-07	1447	transcription factor PRE3	GO:0005634, GO:0046983	nucleus, protein dimerization activity
Prupe.5G089800	-2.33052	2.96162e-07	3919	uncharacterized LOC18776182	#N/A	#N/A
Prupe.2G006300	4.57051	2.96214e-07	3795	---NA---	#N/A	#N/A
Prupe.6G342100	2.9487	2.97112e-07	2955	probable aldo-keto reductase 1	#N/A	#N/A
Prupe.4G152800	-4.81819	3.00928e-07	3959	cytochrome P450 CYP72A219	GO:0055114, GO:0016491, GO:0016020, GO:0016021, GO:0046872, GO:0004497, GO:0005506, GO:0016705, GO:0020037	oxidation-reduction process, oxidoreductase activity, membrane, integral component of membrane, metal ion binding, monooxygenase activity, iron ion binding, oxidoreductase activity, acting on paired donors, with incorporation or reduction of molecular oxygen, heme binding
Prupe.2G005200	2.21183	3.0108e-07	5002	uncharacterized protein At1g04910	GO:0016020, GO:0016021, GO:0016740, GO:0006004, GO:0016757, GO:0005737	membrane, integral component of membrane, transferase activity, fucose metabolic process, transferase activity, transferring glycosyl groups, cytoplasm
Prupe.1G515800	2.18559	3.05656e-07	5500	probable leucine-rich repeat receptor-like protein kinase At1g35710	GO:0005524, GO:0016020, GO:0016021, GO:0004672, GO:0006468, GO:0005515	ATP binding, membrane, integral component of membrane, protein kinase activity, protein phosphorylation, protein binding
Prupe.6G175500	8.4745	3.06761e-07	1217	lecithin retinol acyltransferase	#N/A	#N/A
Prupe.2G182100	-2.44788	3.09672e-07	3427	uncharacterized protein At5g41620	#N/A	#N/A
Prupe.5G096300	-3.52607	3.13582e-07	5559	myosin-11	#N/A	#N/A
Prupe.3G157900	2.83878	3.14259e-07	4403	probable leucine-rich repeat receptor-like protein kinase At1g35710	GO:0005524, GO:0016020, GO:0016021, GO:0004672, GO:0006468, GO:0005886, GO:0004674, GO:0046777, GO:0005515	ATP binding, membrane, integral component of membrane, protein kinase activity, protein phosphorylation, plasma membrane, protein serine/threonine kinase activity, protein autophosphorylation, protein binding
Prupe.5G135700	-2.946	3.15023e-07	830	uncharacterized LOC18776338	#N/A	#N/A
Prupe.5G170000	-2.35219	3.19283e-07	3062	uncharacterized LOC18776790	GO:0016020, GO:0016021	membrane, integral component of membrane
Prupe.6G055900	-3.4433	3.23081e-07	3105	acyl-lipid omega-3 desaturase (cytochrome b5), endoplasmic reticulum	GO:0055114, GO:0016020, GO:0016021, GO:0006629, GO:0016717	oxidation-reduction process, membrane, integral component of membrane, lipid metabolic process, oxidoreductase activity, acting on paired donors, with oxidation of a pair of donors resulting in the reduction of molecular oxygen to two molecules of water
Prupe.1G104400	4.15484	3.25011e-07	6726	ABC transporter B family member 11	GO:0055085, GO:0005524, GO:0000166, GO:0016020, GO:0016021, GO:0016887, GO:0042626	transmembrane transport, ATP binding, nucleotide binding, membrane, integral component of membrane, ATPase activity, ATPase-coupled transmembrane transporter activity
Prupe.2G128400	2.2161	3.28685e-07	3475	receptor like protein 30-like	GO:0005515	protein binding
Prupe.1G241400	-3.03201	3.31606e-07	4698	protein SIEVE ELEMENT OCCLUSION A	GO:0010088	phloem development
Prupe.8G037700	8.15438	3.34243e-07	4004	putative inactive disease susceptibility protein LOV1	GO:0016020, GO:0016021, GO:0043531, GO:0005515	membrane, integral component of membrane, ADP binding, protein binding
Prupe.2G021700	-6.80327	3.37717e-07	3927	receptor-like protein 12	GO:0016020, GO:0016021, GO:0005515	membrane, integral component of membrane, protein binding
Prupe.1G318400	7.02824	3.37997e-07	2618	putative zinc finger protein At1g68190	GO:0008270, GO:0005622	zinc ion binding, intracellular
Prupe.2G281400	-3.56435	3.43985e-07	3876	somatic embryogenesis receptor kinase 1	GO:0005524, GO:0016020, GO:0016021, GO:0004672, GO:0006468, GO:0005515	ATP binding, membrane, integral component of membrane, protein kinase activity, protein phosphorylation, protein binding
Prupe.8G198300	-3.87154	3.47172e-07	3804	uncharacterized LOC109950560	#N/A	#N/A
Prupe.6G164400	6.45083	3.49362e-07	2330	G-type lectin S-receptor-like serine/threonine-protein kinase LECRK3	GO:0005524, GO:0000166, GO:0016301, GO:0016310, GO:0016020, GO:0016021, GO:0016740, GO:0004672, GO:0006468, GO:0004674, GO:0106310, GO:0106311	ATP binding, nucleotide binding, kinase activity, phosphorylation, membrane, integral component of membrane, transferase activity, protein kinase activity, protein phosphorylation, protein serine/threonine kinase activity, ,
Prupe.1G477400	-7.07187	3.51552e-07	2067	BURP domain-containing protein 5	#N/A	#N/A
Prupe.5G102000	5.02464	3.52594e-07	2722	short-chain dehydrogenase TIC 32, chloroplastic	GO:0055114	oxidation-reduction process
Prupe.7G158700	-2.60612	3.59341e-07	3387	cytochrome P450 90A1	GO:0055114, GO:0016491, GO:0016020, GO:0016021, GO:0046872, GO:0004497, GO:0005506, GO:0016705, GO:0020037, GO:0007275, GO:0016125, GO:0010268, GO:0016132	oxidation-reduction process, oxidoreductase activity, membrane, integral component of membrane, metal ion binding, monooxygenase activity, iron ion binding, oxidoreductase activity, acting on paired donors, with incorporation or reduction of molecular oxygen, heme binding, multicellular organism development, sterol metabolic process, brassinosteroid homeostasis, brassinosteroid biosynthetic proce…
Prupe.5G176400	3.44776	3.65873e-07	3227	probable alpha,alpha-trehalose-phosphate synthase [UDP-forming] 9	GO:0003824, GO:0005992, GO:0005829	catalytic activity, trehalose biosynthetic process, cytosol
Prupe.8G108800	-7.13391	3.80872e-07	2937	---NA---	GO:0043531	ADP binding
Prupe.4G110700	4.05088	3.85807e-07	424	cysteine-rich and transmembrane domain-containing protein B-like	#N/A	#N/A
Prupe.1G023000	2.27398	3.86548e-07	3756	ATP sulfurylase 1, chloroplastic	GO:0000166, GO:0005524, GO:0016740, GO:0016779, GO:0016310, GO:0000103, GO:0004781, GO:0004020	nucleotide binding, ATP binding, transferase activity, nucleotidyltransferase activity, phosphorylation, sulfate assimilation, sulfate adenylyltransferase (ATP) activity, adenylylsulfate kinase activity
Prupe.1G400000	2.04587	3.86548e-07	5102	glutamate receptor 2.8	GO:0016020, GO:0016021, GO:0006811, GO:0034220, GO:0004970, GO:0015276, GO:0005886, GO:0038023	membrane, integral component of membrane, ion transport, ion transmembrane transport, ionotropic glutamate receptor activity, ligand-gated ion channel activity, plasma membrane, signaling receptor activity
Prupe.4G251000	2.84804	3.86548e-07	4516	---NA---	#N/A	#N/A
Prupe.8G171400	-5.93703	3.88393e-07	2191	(RS)-norcoclaurine 6-O-methyltransferase	GO:0046983, GO:0008168, GO:0016740, GO:0032259, GO:0008171, GO:0008757, GO:0019438	protein dimerization activity, methyltransferase activity, transferase activity, methylation, O-methyltransferase activity, S-adenosylmethionine-dependent methyltransferase activity, aromatic compound biosynthetic process
Prupe.6G073000	7.74042	3.88596e-07	1462	---NA---	GO:0016020, GO:0016021	membrane, integral component of membrane
Prupe.7G040100	7.43288	3.95064e-07	6866	transcription factor ORG2	GO:0005634, GO:0046983, GO:0003677, GO:0006357, GO:0003700, GO:0000977, GO:0000981, GO:0090575	nucleus, protein dimerization activity, DNA binding, regulation of transcription by RNA polymerase II, DNA-binding transcription factor activity, RNA polymerase II transcription regulatory region sequence-specific DNA binding, DNA-binding transcription factor activity, RNA polymerase II-specific, RNA polymerase II transcription regulator complex
Prupe.2G089900	-4.30734	4.00118e-07	5308	glucomannan 4-beta-mannosyltransferase 9	GO:0016020, GO:0016021, GO:0097502, GO:0005794, GO:0016757, GO:0051753	membrane, integral component of membrane, mannosylation, Golgi apparatus, transferase activity, transferring glycosyl groups, mannan synthase activity
Prupe.8G089500	-3.7374	4.05e-07	7014	beta-galactosidase 3	GO:0005975, GO:0016787, GO:0030246, GO:0016798, GO:0008152, GO:0005576, GO:0004553, GO:0004565, GO:0048046, GO:0005773, GO:0005618	carbohydrate metabolic process, hydrolase activity, carbohydrate binding, hydrolase activity, acting on glycosyl bonds, metabolic process, extracellular region, hydrolase activity, hydrolyzing O-glycosyl compounds, beta-galactosidase activity, apoplast, vacuole, cell wall
Prupe.5G084500	-2.47942	4.0689e-07	2894	probable sugar phosphate/phosphate translocator At1g12500	GO:0016020, GO:0016021, GO:0055085, GO:0005794, GO:0015297	membrane, integral component of membrane, transmembrane transport, Golgi apparatus, antiporter activity
Prupe.3G049600	-8.7327	4.101e-07	4724	protein HOTHEAD	GO:0055114, GO:0050660, GO:0016829, GO:0016614, GO:0010430, GO:0007267, GO:0009553, GO:0046593	oxidation-reduction process, flavin adenine dinucleotide binding, lyase activity, oxidoreductase activity, acting on CH-OH group of donors, fatty acid omega-oxidation, cell-cell signaling, embryo sac development, mandelonitrile lyase activity
Prupe.1G384400	3.8856	4.23169e-07	887	probable calcium-binding protein CML41	GO:0005509, GO:0050790, GO:0019722, GO:0000226, GO:0030234	calcium ion binding, regulation of catalytic activity, calcium-mediated signaling, microtubule cytoskeleton organization, enzyme regulator activity
Prupe.4G169500	4.63919	4.29548e-07	3105	tyrosine-sulfated glycopeptide receptor 1	GO:0016020, GO:0016021, GO:0005515	membrane, integral component of membrane, protein binding
Prupe.4G250300	3.35123	4.30664e-07	1469	protein DETOXIFICATION 42	GO:0016020, GO:0016021, GO:0009507	membrane, integral component of membrane, chloroplast
Prupe.1G430400	-4.41546	4.42187e-07	3810	probable isoaspartyl peptidase/L-asparaginase 2	GO:0016787, GO:0005737, GO:0004067, GO:0008798, GO:0016540	hydrolase activity, cytoplasm, asparaginase activity, beta-aspartyl-peptidase activity, protein autoprocessing
Prupe.8G172000	-3.96451	4.5079e-07	1870	(RS)-norcoclaurine 6-O-methyltransferase	GO:0046983, GO:0008168, GO:0016740, GO:0032259, GO:0008171, GO:0008757, GO:0019438	protein dimerization activity, methyltransferase activity, transferase activity, methylation, O-methyltransferase activity, S-adenosylmethionine-dependent methyltransferase activity, aromatic compound biosynthetic process
Prupe.1G517900	-2.79214	4.55199e-07	1396	---NA---	#N/A	#N/A
Prupe.1G083300	3.36663	4.61665e-07	1553	rust resistance kinase Lr10-like	GO:0005524, GO:0000166, GO:0016301, GO:0016310, GO:0016740, GO:0004672, GO:0006468, GO:0004674	ATP binding, nucleotide binding, kinase activity, phosphorylation, transferase activity, protein kinase activity, protein phosphorylation, protein serine/threonine kinase activity
Prupe.2G136400	-2.79202	4.67149e-07	1205	cyclin-U2-1	GO:0019901, GO:0000079	protein kinase binding, regulation of cyclin-dependent protein serine/threonine kinase activity
Prupe.6G105800	4.55653	4.7145e-07	883	kiwellin	#N/A	#N/A
Prupe.4G245100	3.35376	4.73309e-07	2322	---NA---	#N/A	#N/A
Prupe.2G159300	-5.0028	4.73889e-07	3401	---NA---	#N/A	#N/A
Prupe.7G060500	-2.41148	4.78788e-07	1797	uncharacterized LOC109950383	#N/A	#N/A
Prupe.2G266400	-3.13869	4.94273e-07	4649	probable inactive receptor kinase At5g58300	GO:0005524, GO:0016020, GO:0016021, GO:0004672, GO:0006468, GO:0005515	ATP binding, membrane, integral component of membrane, protein kinase activity, protein phosphorylation, protein binding
Prupe.8G062900	-2.03521	5.04973e-07	598	---NA---	#N/A	#N/A
Prupe.4G194300	-5.4808	5.15828e-07	2774	(-)-alpha-pinene synthase-like	GO:0046872, GO:0000287, GO:0010333, GO:0016829	metal ion binding, magnesium ion binding, terpene synthase activity, lyase activity
Prupe.8G066100	4.05182	5.16382e-07	888	classical arabinogalactan protein 9-like	#N/A	#N/A
Prupe.6G176800	2.86398	5.17486e-07	739	---NA---	#N/A	#N/A
Prupe.7G207000	-2.98186	5.19107e-07	3292	5'-nucleotidase SurE	GO:0016787	hydrolase activity
Prupe.1G541300	-4.00997	5.23957e-07	3564	disease resistance protein RGA2	GO:0043531	ADP binding
Prupe.3G205100	-3.85461	5.25518e-07	2257	fasciclin-like arabinogalactan protein 7	GO:0005886, GO:0009834,	plasma membrane, plant-type secondary cell wall biogenesis,
Prupe.5G001800	-4.87862	5.35849e-07	2469	galactan beta-1,4-galactosyltransferase GALS1	GO:0016020, GO:0016740, GO:0016757, GO:0042546, GO:0005794, GO:0048531, GO:0045489, GO:0003831	membrane, transferase activity, transferase activity, transferring glycosyl groups, cell wall biogenesis, Golgi apparatus, beta-1,3-galactosyltransferase activity, pectin biosynthetic process, beta-N-acetylglucosaminylglycopeptide beta-1,4-galactosyltransferase activity
Prupe.6G342600	5.51571	5.3715e-07	1650	calmodulin-like protein 8	GO:0005509	calcium ion binding
Prupe.4G056600	3.13782	5.54149e-07	3520	glutamate receptor 2.7	GO:0016020, GO:0016021, GO:0006811, GO:0034220, GO:0004970, GO:0015276, GO:0005886, GO:0038023	membrane, integral component of membrane, ion transport, ion transmembrane transport, ionotropic glutamate receptor activity, ligand-gated ion channel activity, plasma membrane, signaling receptor activity
Prupe.1G420000	-2.70939	5.61896e-07	755	phytosulfokines 3	GO:0005576, GO:0030154, GO:0008083, GO:0008283, GO:0007165	extracellular region, cell differentiation, growth factor activity, cell population proliferation, signal transduction
Prupe.4G233600	3.46319	5.72566e-07	2681	receptor-like protein 12	GO:0016020, GO:0016021, GO:0005515	membrane, integral component of membrane, protein binding
Prupe.6G190600	-2.89921	5.79227e-07	2153	7-deoxyloganetin glucosyltransferase	GO:0016740, GO:0016757, GO:0016758, GO:0008194, GO:0080043, GO:0080044	transferase activity, transferase activity, transferring glycosyl groups, transferase activity, transferring hexosyl groups, UDP-glycosyltransferase activity, quercetin 3-O-glucosyltransferase activity, quercetin 7-O-glucosyltransferase activity
Prupe.3G057400	-3.6001	6.0223e-07	3044	uncharacterized LOC109947780	GO:0016020, GO:0016021	membrane, integral component of membrane
Prupe.1G476800	3.28756	6.11031e-07	1222	---NA---	GO:0003676, GO:0003723	nucleic acid binding, RNA binding
Prupe.5G146100	-2.16268	6.14183e-07	1229	NAC domain-containing protein 83	GO:0003677, GO:0006355, GO:0005634	DNA binding, regulation of transcription, DNA-templated, nucleus
Prupe.8G240600	-3.67936	6.14183e-07	1813	probable inactive patatin-like protein 9	GO:0016787, GO:0016042, GO:0006629	hydrolase activity, lipid catabolic process, lipid metabolic process
Prupe.6G055300	-2.29144	6.2554e-07	1885	gibberellin 2-beta-dioxygenase 8	GO:0055114, GO:0016491, GO:0046872, GO:0051213	oxidation-reduction process, oxidoreductase activity, metal ion binding, dioxygenase activity
Prupe.4G000900	3.89419	6.3046e-07	1394	---NA---	#N/A	#N/A
Prupe.6G087500	7.19001	6.3046e-07	4210	uncharacterized protein At1g24485	GO:0016020, GO:0016021	membrane, integral component of membrane
Prupe.6G301100	2.22423	6.30627e-07	6137	probable leucine-rich repeat receptor-like protein kinase At5g49770	GO:0005524, GO:0000166, GO:0016301, GO:0016310, GO:0016020, GO:0016021, GO:0016740, GO:0004672, GO:0006468, GO:0004674	ATP binding, nucleotide binding, kinase activity, phosphorylation, membrane, integral component of membrane, transferase activity, protein kinase activity, protein phosphorylation, protein serine/threonine kinase activity
Prupe.8G103300	-7.05551	6.33356e-07	2503	---NA---	GO:0043130	ubiquitin binding
Prupe.7G261500	-2.94464	6.43907e-07	4544	reticulon-like protein B21	GO:0005789, GO:0016020, GO:0016021, GO:0005783	endoplasmic reticulum membrane, membrane, integral component of membrane, endoplasmic reticulum
Prupe.7G264900	-2.14544	6.55086e-07	507	---NA---	#N/A	#N/A
Prupe.8G192100	-2.87555	6.60313e-07	3232	asparagine--tRNA ligase, cytoplasmic 2	GO:0005524, GO:0000166, GO:0004812, GO:0006418, GO:0005739, GO:0009507	ATP binding, nucleotide binding, aminoacyl-tRNA ligase activity, tRNA aminoacylation for protein translation, mitochondrion, chloroplast
Prupe.1G513200	-2.25541	6.64679e-07	4424	probable beta-D-xylosidase 7	GO:0005975, GO:0016787, GO:0016798, GO:0008152, GO:0005576, GO:0004553, GO:0009505, GO:0046556, GO:0009044, GO:0031222, GO:0045493	carbohydrate metabolic process, hydrolase activity, hydrolase activity, acting on glycosyl bonds, metabolic process, extracellular region, hydrolase activity, hydrolyzing O-glycosyl compounds, plant-type cell wall, alpha-L-arabinofuranosidase activity, xylan 1,4-beta-xylosidase activity, arabinan catabolic process, xylan catabolic process
Prupe.6G197400	-4.20286	7.17297e-07	559	---NA---	GO:0004857, GO:0043086	enzyme inhibitor activity, negative regulation of catalytic activity
Prupe.1G080700	3.57612	7.20168e-07	1380	endochitinase EP3	GO:0005975, GO:0006952, GO:0004568, GO:0008061, GO:0006032, GO:0016998	carbohydrate metabolic process, defense response, chitinase activity, chitin binding, chitin catabolic process, cell wall macromolecule catabolic process
Prupe.3G129200	-7.15438	7.23579e-07	1716	---NA---	GO:0046983, GO:0008168, GO:0016740, GO:0032259, GO:0008171, GO:0008757, GO:0019438	protein dimerization activity, methyltransferase activity, transferase activity, methylation, O-methyltransferase activity, S-adenosylmethionine-dependent methyltransferase activity, aromatic compound biosynthetic process
Prupe.5G098200	-6.2805	7.23658e-07	4954	FT-interacting protein 1	GO:0016020, GO:0016021	membrane, integral component of membrane
Prupe.4G266700	-3.81786	7.33938e-07	236	---NA---	#N/A	#N/A
Prupe.1G449700	-2.26353	7.52082e-07	3281	VAN3-binding protein	, GO:0016020, GO:0016021	, membrane, integral component of membrane
Prupe.1G295500	-2.13781	7.56106e-07	2838	protein ABHD17B	, GO:0016787	, hydrolase activity
Prupe.7G133600	2.5293	7.56106e-07	2178	heat stress transcription factor B-1	GO:0005634, GO:0003677, GO:0006355, GO:0003700, GO:0043565, GO:0006357, GO:0000978, GO:0009408, GO:0045892	nucleus, DNA binding, regulation of transcription, DNA-templated, DNA-binding transcription factor activity, sequence-specific DNA binding, regulation of transcription by RNA polymerase II, RNA polymerase II cis-regulatory region sequence-specific DNA binding, response to heat, negative regulation of transcription, DNA-templated
Prupe.4G091200	-2.08839	7.59114e-07	5099	probable LRR receptor-like serine/threonine-protein kinase At4g20940	GO:0005524, GO:0016020, GO:0016021, GO:0004672, GO:0006468, GO:0005515	ATP binding, membrane, integral component of membrane, protein kinase activity, protein phosphorylation, protein binding
Prupe.3G051700	-5.05786	7.64613e-07	3382	---NA---	GO:0005524, GO:0000166, GO:0016887, GO:0000325, GO:0005774, GO:0016020, GO:0042626, GO:0055085	ATP binding, nucleotide binding, ATPase activity, plant-type vacuole, vacuolar membrane, membrane, ATPase-coupled transmembrane transporter activity, transmembrane transport
Prupe.1G161500	2.63572	7.70514e-07	3116	---NA---	, GO:0000398, GO:0005684	, mRNA splicing, via spliceosome, U2-type spliceosomal complex
Prupe.2G243800	-5.62743	7.82686e-07	1138	18.1 kDa class I heat shock protein	GO:0009651, GO:0043621, GO:0051082, GO:0006457, GO:0009408, GO:0051259, GO:0042542	response to salt stress, protein self-association, unfolded protein binding, protein folding, response to heat, protein complex oligomerization, response to hydrogen peroxide
Prupe.5G091700	-3.68989	7.91684e-07	2276	scarecrow-like protein 28	GO:0005634, GO:1900459, GO:0003700, GO:0043565, GO:0006355	nucleus, positive regulation of brassinosteroid mediated signaling pathway, DNA-binding transcription factor activity, sequence-specific DNA binding, regulation of transcription, DNA-templated
Prupe.3G026200	-2.45232	8.37856e-07	6080	---NA---	GO:0016853, GO:0016866, GO:0005811, GO:0000250, GO:0042300, GO:0016104	isomerase activity, intramolecular transferase activity, lipid droplet, lanosterol synthase activity, beta-amyrin synthase activity, triterpenoid biosynthetic process
Prupe.5G004300	-4.05774	8.45965e-07	4719	protein PIN-LIKES 3	GO:0055085, GO:0016020, GO:0016021, GO:0009734	transmembrane transport, membrane, integral component of membrane, auxin-activated signaling pathway
Prupe.3G099400	2.79698	8.82869e-07	1001	non-functional pseudokinase ZED1	GO:0005524, GO:0004672, GO:0006468, GO:0005886, GO:0004674, GO:0007166	ATP binding, protein kinase activity, protein phosphorylation, plasma membrane, protein serine/threonine kinase activity, cell surface receptor signaling pathway
Prupe.5G199900	-2.84364	8.92412e-07	2960	flavin-containing monooxygenase FMO GS-OX-like 9	GO:0055114, GO:0016491, GO:0050660, GO:0004497, GO:0050661, GO:0004499	oxidation-reduction process, oxidoreductase activity, flavin adenine dinucleotide binding, monooxygenase activity, NADP binding, N,N-dimethylaniline monooxygenase activity
Prupe.4G203600	3.64066	8.98527e-07	2339	protein ACCELERATED CELL DEATH 6	GO:0016020, GO:0016021, GO:0031347, GO:0071446, GO:2000031, GO:0005515	membrane, integral component of membrane, regulation of defense response, cellular response to salicylic acid stimulus, regulation of salicylic acid mediated signaling pathway, protein binding
Prupe.7G063100	-2.99665	9.07093e-07	4210	leucine-rich repeat receptor-like tyrosine-protein kinase PXC3	GO:0005524, GO:0016020, GO:0016021, GO:0004672, GO:0006468, GO:0005886, GO:0005515	ATP binding, membrane, integral component of membrane, protein kinase activity, protein phosphorylation, plasma membrane, protein binding
Prupe.8G096300	-4.49115	9.13555e-07	1174	transcription factor RADIALIS	GO:0005634, GO:0003677	nucleus, DNA binding
Prupe.1G033100	8.58597	9.18752e-07	305	---NA---	#N/A	#N/A
Prupe.6G139800	-3.51234	9.20019e-07	1240	probable CCR4-associated factor 1 homolog 11	GO:0005634, GO:0005737, GO:0003676, GO:0090305, GO:0004518, GO:0090503, GO:0004527, GO:0030014, GO:0004535, GO:0043928, GO:0000932, GO:0017148, GO:0030015	nucleus, cytoplasm, nucleic acid binding, nucleic acid phosphodiester bond hydrolysis, nuclease activity, RNA phosphodiester bond hydrolysis, exonucleolytic, exonuclease activity, CCR4-NOT complex, poly(A)-specific ribonuclease activity, exonucleolytic catabolism of deadenylated mRNA, P-body, negative regulation of translation, CCR4-NOT core complex
Prupe.1G520300	-5.19633	9.43883e-07	1630	7-deoxyloganetin glucosyltransferase	GO:0016740, GO:0016757, GO:0016758, GO:0008194, GO:0080043, GO:0080044	transferase activity, transferase activity, transferring glycosyl groups, transferase activity, transferring hexosyl groups, UDP-glycosyltransferase activity, quercetin 3-O-glucosyltransferase activity, quercetin 7-O-glucosyltransferase activity
Prupe.2G072100	-2.03973	9.43883e-07	5193	---NA---	GO:0016491, GO:0055114, GO:0022904, GO:0005737, GO:0050660, GO:0004174	oxidoreductase activity, oxidation-reduction process, respiratory electron transport chain, cytoplasm, flavin adenine dinucleotide binding, electron-transferring-flavoprotein dehydrogenase activity
Prupe.3G016900	-2.52473	9.54177e-07	4557	glucan endo-1,3-beta-glucosidase 2	GO:0005975, GO:0016787, GO:0016798, GO:0008152, GO:0004553, GO:0042973, GO:0046658	carbohydrate metabolic process, hydrolase activity, hydrolase activity, acting on glycosyl bonds, metabolic process, hydrolase activity, hydrolyzing O-glycosyl compounds, glucan endo-1,3-beta-D-glucosidase activity, anchored component of plasma membrane
Prupe.3G185000	3.13684	9.80737e-07	1567	UDP-glycosyltransferase 71A16	GO:0016740, GO:0016757, GO:0016758, GO:0008194	transferase activity, transferase activity, transferring glycosyl groups, transferase activity, transferring hexosyl groups, UDP-glycosyltransferase activity
Prupe.7G268900	4.5445	9.83389e-07	2637	2-alkenal reductase (NADP(+)-dependent)	GO:0055114, GO:0016491, GO:0032440	oxidation-reduction process, oxidoreductase activity, 2-alkenal reductase [NAD(P)+] activity
Prupe.5G235500	-3.79601	9.88146e-07	3168	probable inactive receptor kinase At1g48480	GO:0005524, GO:0016020, GO:0016021, GO:0004672, GO:0006468	ATP binding, membrane, integral component of membrane, protein kinase activity, protein phosphorylation
Prupe.3G170800	-3.02234	9.91788e-07	3576	trifunctional UDP-glucose 4,6-dehydratase/UDP-4-keto-6-deoxy-D-glucose 3,5-epimerase/UDP-4-keto-L-rhamnose-reductase RHM1	GO:0008460, GO:0009225, GO:0010315, GO:0010253, GO:0010280, GO:0050377, GO:0051555	dTDP-glucose 4,6-dehydratase activity, nucleotide-sugar metabolic process, auxin efflux, UDP-rhamnose biosynthetic process, UDP-L-rhamnose synthase activity, UDP-glucose 4,6-dehydratase activity, flavonol biosynthetic process
Prupe.6G049600	6.10043	1.01692e-06	1968	UDP-glycosyltransferase 87A1	GO:0016740, GO:0016758, GO:0008194	transferase activity, transferase activity, transferring hexosyl groups, UDP-glycosyltransferase activity
Prupe.3G169200	-4.87376	1.05066e-06	5165	---NA---	#N/A	#N/A
Prupe.3G068300	-2.78231	1.05398e-06	4559	uncharacterized LOC18784352	GO:0016020, GO:0016021, GO:0016567, GO:0031464	membrane, integral component of membrane, protein ubiquitination, Cul4A-RING E3 ubiquitin ligase complex
Prupe.4G261200	-7.22682	1.06526e-06	4400	---NA---	GO:0006508, GO:0008234	proteolysis, cysteine-type peptidase activity
Prupe.1G357100	-3.9467	1.07821e-06	5178	L-ascorbate oxidase homolog	GO:0016491, GO:0055114, GO:0005507	oxidoreductase activity, oxidation-reduction process, copper ion binding
Prupe.8G107500	-4.61728	1.08163e-06	584	uncharacterized LOC18768896	#N/A	#N/A
Prupe.4G120400	-2.44626	1.08821e-06	2516	probable GMP synthase [glutamine-hydrolyzing]	GO:0003824, GO:0006281, GO:0006284, GO:0008725	catalytic activity, DNA repair, base-excision repair, DNA-3-methyladenine glycosylase activity
Prupe.5G133400	-4.40425	1.09449e-06	4005	beta-1,6-galactosyltransferase GALT31A	GO:0005794, GO:0016020, GO:0016021, GO:0016757, GO:0006486, GO:0000139, GO:0008378	Golgi apparatus, membrane, integral component of membrane, transferase activity, transferring glycosyl groups, protein glycosylation, Golgi membrane, galactosyltransferase activity
Prupe.1G394200	-3.86588	1.10937e-06	952	early nodulin-like protein 1	GO:0009055, GO:0022900, GO:0046658	electron transfer activity, electron transport chain, anchored component of plasma membrane
Prupe.2G161300	-2.50464	1.11756e-06	2558	---NA---	GO:0055114, GO:0016020	oxidation-reduction process, membrane
Prupe.2G040300	2.22907	1.12503e-06	2344	---NA---	GO:0006355, GO:0003690, GO:0009507, GO:0009658, GO:0032502, GO:0006353	regulation of transcription, DNA-templated, double-stranded DNA binding, chloroplast, chloroplast organization, developmental process, DNA-templated transcription, termination
Prupe.6G354900	-2.16144	1.13915e-06	4183	probable leucine-rich repeat receptor-like protein kinase At5g63930	GO:0005524, GO:0016020, GO:0016021, GO:0004672, GO:0006468, GO:0005515, GO:0005886	ATP binding, membrane, integral component of membrane, protein kinase activity, protein phosphorylation, protein binding, plasma membrane
Prupe.2G167600	2.31927	1.14467e-06	4223	probable LRR receptor-like serine/threonine-protein kinase At4g36180	GO:0016020, GO:0016021, GO:0005515	membrane, integral component of membrane, protein binding
Prupe.6G224600	-2.98177	1.1627e-06	2341	subtilisin-like protease SBT1.7	GO:0016787, GO:0008233, GO:0006508, GO:0004252, GO:0008236	hydrolase activity, peptidase activity, proteolysis, serine-type endopeptidase activity, serine-type peptidase activity
Prupe.2G098600	7.7996	1.1777e-06	3968	non-specific phospholipase C3	GO:0003824, GO:0016787, GO:0016788, GO:0009395	catalytic activity, hydrolase activity, hydrolase activity, acting on ester bonds, phospholipid catabolic process
Prupe.8G114200	2.90571	1.17936e-06	1919	probable 2-oxoglutarate-dependent dioxygenase At5g05600	GO:0055114, GO:0016491, GO:0046872	oxidation-reduction process, oxidoreductase activity, metal ion binding
Prupe.1G481300	-2.50876	1.18649e-06	2546	---NA---	GO:0005634, GO:0006355, GO:0003712	nucleus, regulation of transcription, DNA-templated, transcription coregulator activity
Prupe.5G236500	-3.94212	1.20217e-06	4893	---NA---	GO:0005886, GO:0016020, GO:0016021, GO:0015079, GO:0006811, GO:0006813, GO:0071805	plasma membrane, membrane, integral component of membrane, potassium ion transmembrane transporter activity, ion transport, potassium ion transport, potassium ion transmembrane transport
Prupe.4G140900	-7.84324	1.20439e-06	660	---NA---	GO:0044183, GO:0009408, GO:0010162, GO:0010231	protein folding chaperone, response to heat, seed dormancy process, maintenance of seed dormancy
Prupe.3G304400	-3.00924	1.21541e-06	2789	LRR receptor-like serine/threonine-protein kinase FLS2	GO:0005515	protein binding
Prupe.8G171900	-4.87213	1.25247e-06	1889	3'-hydroxy-N-methyl-(S)-coclaurine 4'-O-methyltransferase 2	GO:0008168, GO:0016740, GO:0032259, GO:0008171, GO:0008757, GO:0019438	methyltransferase activity, transferase activity, methylation, O-methyltransferase activity, S-adenosylmethionine-dependent methyltransferase activity, aromatic compound biosynthetic process
Prupe.6G199400	-6.49868	1.25288e-06	3353	---NA---	GO:0043531, GO:0006952, GO:0005515	ADP binding, defense response, protein binding
Prupe.7G056700	2.72141	1.25496e-06	2396	heat stress transcription factor B-3	GO:0005634, GO:0003677, GO:0006355, GO:0003700, GO:0043565, GO:0006357, GO:0000978, GO:0046686	nucleus, DNA binding, regulation of transcription, DNA-templated, DNA-binding transcription factor activity, sequence-specific DNA binding, regulation of transcription by RNA polymerase II, RNA polymerase II cis-regulatory region sequence-specific DNA binding, response to cadmium ion
Prupe.8G064000	2.60145	1.25664e-06	4313	nitronate monooxygenase	GO:0003824, GO:0055114, GO:0018580	catalytic activity, oxidation-reduction process, nitronate monooxygenase activity
Prupe.1G351100	-4.03131	1.25968e-06	716	---NA---	#N/A	#N/A
Prupe.2G057100	-2.22119	1.29945e-06	8047	---NA---	, GO:0007165, GO:0016787, GO:0043531, GO:0006952, GO:0005515, GO:0050135, GO:0061809	, signal transduction, hydrolase activity, ADP binding, defense response, protein binding, NAD(P)+ nucleosidase activity, NAD+ nucleotidase, cyclic ADP-ribose generating
Prupe.3G058900	-6.64969	1.29945e-06	2113	uncharacterized LOC18782346	#N/A	#N/A
Prupe.5G118000	-3.3345	1.29945e-06	4616	---NA---	GO:0005975, GO:0016787, GO:0030246, GO:0016798, GO:0008152, GO:0005576, GO:0004553, GO:0008810, GO:0000272, GO:0030245	carbohydrate metabolic process, hydrolase activity, carbohydrate binding, hydrolase activity, acting on glycosyl bonds, metabolic process, extracellular region, hydrolase activity, hydrolyzing O-glycosyl compounds, cellulase activity, polysaccharide catabolic process, cellulose catabolic process
Prupe.6G297200	-2.39708	1.31358e-06	2701	---NA---	GO:0005524, GO:0000166, GO:0016301, GO:0016310, GO:0016020, GO:0016021, GO:0016740, GO:0004672, GO:0006468, GO:0004674	ATP binding, nucleotide binding, kinase activity, phosphorylation, membrane, integral component of membrane, transferase activity, protein kinase activity, protein phosphorylation, protein serine/threonine kinase activity
Prupe.8G110100	9.25043	1.31358e-06	1820	allene oxide synthase 1, chloroplastic	GO:0055114, GO:0005506, GO:0016705, GO:0020037, GO:0004497, GO:0016491, GO:0016125	oxidation-reduction process, iron ion binding, oxidoreductase activity, acting on paired donors, with incorporation or reduction of molecular oxygen, heme binding, monooxygenase activity, oxidoreductase activity, sterol metabolic process
Prupe.1G386800	-2.50295	1.3148e-06	2430	cytochrome P450 CYP82D47	GO:0055114, GO:0016491, GO:0046872, GO:0004497, GO:0005506, GO:0016705, GO:0020037, GO:0016020, GO:0016021, GO:0098542	oxidation-reduction process, oxidoreductase activity, metal ion binding, monooxygenase activity, iron ion binding, oxidoreductase activity, acting on paired donors, with incorporation or reduction of molecular oxygen, heme binding, membrane, integral component of membrane, defense response to other organism
Prupe.5G069600	-9.05411	1.33422e-06	3285	probable pectinesterase 68	GO:0016787, GO:0045490, GO:0030599, GO:0045330, GO:0042545, GO:0005618, GO:0052689	hydrolase activity, pectin catabolic process, pectinesterase activity, aspartyl esterase activity, cell wall modification, cell wall, carboxylic ester hydrolase activity
Prupe.6G157200	7.18868	1.33914e-06	6855	---NA---	#N/A	#N/A
Prupe.3G164300	-2.86645	1.41654e-06	4354	receptor protein kinase TMK1	GO:0005524, GO:0000166, GO:0016301, GO:0016310, GO:0016020, GO:0016021, GO:0016740, GO:0004672, GO:0006468, GO:0004674, GO:0005515	ATP binding, nucleotide binding, kinase activity, phosphorylation, membrane, integral component of membrane, transferase activity, protein kinase activity, protein phosphorylation, protein serine/threonine kinase activity, protein binding
Prupe.4G117100	-2.21257	1.41904e-06	2258	zinc transporter 5	GO:0055085, GO:0016020, GO:0016021, GO:0006811, GO:0046873, GO:0030001, GO:0005385, GO:0071577, GO:0005886	transmembrane transport, membrane, integral component of membrane, ion transport, metal ion transmembrane transporter activity, metal ion transport, zinc ion transmembrane transporter activity, zinc ion transmembrane transport, plasma membrane
Prupe.1G046000	-4.51577	1.41922e-06	1569	uncharacterized LOC18789409	GO:0007142	male meiosis II
Prupe.7G208500	4.35396	1.42891e-06	2485	cytokinin dehydrogenase 2	GO:0003824, GO:0016491, GO:0055114, GO:0050660, GO:0071949, GO:0019139, GO:0009690	catalytic activity, oxidoreductase activity, oxidation-reduction process, flavin adenine dinucleotide binding, FAD binding, cytokinin dehydrogenase activity, cytokinin metabolic process
Prupe.1G338700	-2.07068	1.46405e-06	3108	protein SHOOT GRAVITROPISM 5	GO:0046872, GO:0003676, GO:0009630, GO:0005634	metal ion binding, nucleic acid binding, gravitropism, nucleus
Prupe.1G314900	-4.39879	1.49368e-06	2980	probable leucine-rich repeat receptor-like protein kinase At1g68400	GO:0005524, GO:0016020, GO:0016021, GO:0004672, GO:0006468, GO:0005515	ATP binding, membrane, integral component of membrane, protein kinase activity, protein phosphorylation, protein binding
Prupe.3G211500	-3.65643	1.51222e-06	3634	endoglucanase 11	GO:0005975, GO:0016787, GO:0016798, GO:0008152, GO:0004553, GO:0008810, GO:0000272, GO:0030245	carbohydrate metabolic process, hydrolase activity, hydrolase activity, acting on glycosyl bonds, metabolic process, hydrolase activity, hydrolyzing O-glycosyl compounds, cellulase activity, polysaccharide catabolic process, cellulose catabolic process
Prupe.6G033500	3.13573	1.52559e-06	449	---NA---	#N/A	#N/A
Prupe.6G089900	6.93595	1.53965e-06	2614	uncharacterized LOC18775259	GO:0008375	acetylglucosaminyltransferase activity
Prupe.1G432300	2.6115	1.56633e-06	2140	uncharacterized acetyltransferase At3g50280	GO:0016747	transferase activity, transferring acyl groups other than amino-acyl groups
Prupe.7G248300	-3.95882	1.57135e-06	3202	---NA---	#N/A	#N/A
Prupe.4G169300	2.24233	1.58015e-06	2582	receptor-like protein 2	GO:0016020, GO:0016021, GO:0005515	membrane, integral component of membrane, protein binding
Prupe.1G208600	-3.61359	1.59988e-06	4977	pectin acetylesterase 10	GO:0016787, GO:0071555, GO:0005576, GO:0005618, GO:0009505, GO:0052793	hydrolase activity, cell wall organization, extracellular region, cell wall, plant-type cell wall, pectin acetylesterase activity
Prupe.4G270700	4.33348	1.61505e-06	1770	---NA---	#N/A	#N/A
Prupe.2G242000	-3.71025	1.63345e-06	3799	cucumisin	GO:0016787, GO:0008233, GO:0006508, GO:0004252, GO:0008236	hydrolase activity, peptidase activity, proteolysis, serine-type endopeptidase activity, serine-type peptidase activity
Prupe.4G121500	-2.35492	1.63362e-06	4610	leucine-rich repeat receptor-like serine/threonine-protein kinase BAM3	GO:0005524, GO:0016020, GO:0016021, GO:0004672, GO:0006468, GO:0005886, GO:0009755, GO:0005515	ATP binding, membrane, integral component of membrane, protein kinase activity, protein phosphorylation, plasma membrane, hormone-mediated signaling pathway, protein binding
Prupe.4G157300	-2.73595	1.68229e-06	719	berberine bridge enzyme-like 1	GO:0016491, GO:0055114, GO:0050660	oxidoreductase activity, oxidation-reduction process, flavin adenine dinucleotide binding
Prupe.2G260700	-2.22286	1.69255e-06	3527	protein NRT1/ PTR FAMILY 5.1	GO:0055085, GO:0016020, GO:0016021, GO:0022857	transmembrane transport, membrane, integral component of membrane, transmembrane transporter activity
Prupe.8G146700	-3.56944	1.70302e-06	2475	cyclin-D4-1	GO:0007049, GO:0051301, GO:0005634, GO:0005737, GO:0000079, GO:0000307, GO:0016538, GO:0044772	cell cycle, cell division, nucleus, cytoplasm, regulation of cyclin-dependent protein serine/threonine kinase activity, cyclin-dependent protein kinase holoenzyme complex, cyclin-dependent protein serine/threonine kinase regulator activity, mitotic cell cycle phase transition
Prupe.6G136700	9.35256	1.7082e-06	3088	beta-glucosidase 12	GO:0005975, GO:0016787, GO:0004553, GO:0008422, GO:0009651, GO:0019762	carbohydrate metabolic process, hydrolase activity, hydrolase activity, hydrolyzing O-glycosyl compounds, beta-glucosidase activity, response to salt stress, glucosinolate catabolic process
Prupe.8G267700	3.38136	1.73131e-06	1367	NDR1/HIN1-like protein 13	GO:0016020, GO:0016021	membrane, integral component of membrane
Prupe.1G477200	-6.23346	1.73532e-06	2192	BURP domain protein RD22	#N/A	#N/A
Prupe.4G245000	7.1058	1.74974e-06	1099	---NA---	#N/A	#N/A
Prupe.8G029600	-7.21553	1.75434e-06	2244	ankyrin repeat-containing protein NPR4	GO:0016020, GO:0016021	membrane, integral component of membrane
Prupe.4G246700	9.99285	1.75496e-06	1204	---NA---	#N/A	#N/A
Prupe.5G094200	3.38375	1.78233e-06	930	protein P21	GO:0005576, GO:0006952	extracellular region, defense response
Prupe.6G284600	-3.17	1.79305e-06	2755	probably inactive leucine-rich repeat receptor-like protein kinase IMK2	GO:0005524, GO:0016020, GO:0016021, GO:0004672, GO:0006468, GO:0005515	ATP binding, membrane, integral component of membrane, protein kinase activity, protein phosphorylation, protein binding
Prupe.4G051900	-4.11415	1.80505e-06	2492	uncharacterized LOC18779045	#N/A	#N/A
Prupe.5G073000	-4.15966	1.81388e-06	2458	36.4 kDa proline-rich protein	#N/A	#N/A
Prupe.1G169700	-3.71899	1.85494e-06	2261	xyloglucan endotransglucosylase/hydrolase 2	GO:0005975, GO:0016787, GO:0016740, GO:0016798, GO:0008152, GO:0071555, GO:0005576, GO:0004553, GO:0005618, GO:0048046, GO:0016762, GO:0006073, GO:0010411, GO:0042546	carbohydrate metabolic process, hydrolase activity, transferase activity, hydrolase activity, acting on glycosyl bonds, metabolic process, cell wall organization, extracellular region, hydrolase activity, hydrolyzing O-glycosyl compounds, cell wall, apoplast, xyloglucan:xyloglucosyl transferase activity, cellular glucan metabolic process, xyloglucan metabolic process, cell wall biogenesis
Prupe.8G014300	7.31111	1.85615e-06	1401	---NA---	GO:0016020, GO:0016021	membrane, integral component of membrane
Prupe.1G509900	2.68565	1.86925e-06	888	---NA---	#N/A	#N/A
Prupe.6G015500	3.6898	1.86925e-06	5129	receptor-like protein 2	GO:0016020, GO:0016021, GO:0005515	membrane, integral component of membrane, protein binding
Prupe.6G139700	6.9818	1.92572e-06	5180	---NA---	GO:0005634, GO:0046983, GO:0003677, GO:0006355, GO:0003700, GO:0006396, GO:0007049, GO:0005667, GO:0000398, GO:0000974, GO:0071007, GO:0000245, GO:0071014, GO:0005515	nucleus, protein dimerization activity, DNA binding, regulation of transcription, DNA-templated, DNA-binding transcription factor activity, RNA processing, cell cycle, transcription regulator complex, mRNA splicing, via spliceosome, Prp19 complex, U2-type catalytic step 2 spliceosome, spliceosomal complex assembly, post-mRNA release spliceosomal complex, protein binding
Prupe.4G172000	-9.10028	1.92776e-06	2934	basic leucine zipper 34	GO:0006355, GO:0003700, GO:0005634, GO:0003677, GO:0045893	regulation of transcription, DNA-templated, DNA-binding transcription factor activity, nucleus, DNA binding, positive regulation of transcription, DNA-templated
Prupe.1G139900	-4.29405	1.93011e-06	2882	probable serine/threonine-protein kinase PBL21	GO:0005524, GO:0016020, GO:0016021, GO:0004672, GO:0006468	ATP binding, membrane, integral component of membrane, protein kinase activity, protein phosphorylation
Prupe.4G184000	-6.91957	1.9327e-06	7518	putative nuclear RNA export factor SDE5	#N/A	#N/A
Prupe.5G075700	-2.89117	1.97606e-06	4357	monocopper oxidase-like protein SKU5	GO:0016491, GO:0055114, GO:0005507, GO:0046658	oxidoreductase activity, oxidation-reduction process, copper ion binding, anchored component of plasma membrane
Prupe.6G324400	2.51715	2.00111e-06	5041	probable linoleate 9S-lipoxygenase 5	GO:0005737, GO:0055114, GO:0016491, GO:0046872, GO:0016702, GO:0051213, GO:0006633, GO:0031408, GO:0006629, GO:0006631, GO:0034440, GO:0005515	cytoplasm, oxidation-reduction process, oxidoreductase activity, metal ion binding, oxidoreductase activity, acting on single donors with incorporation of molecular oxygen, incorporation of two atoms of oxygen, dioxygenase activity, fatty acid biosynthetic process, oxylipin biosynthetic process, lipid metabolic process, fatty acid metabolic process, lipid oxidation, protein binding
Prupe.5G025200	2.54023	2.00438e-06	3306	disease resistance protein RPM1	GO:0043531, GO:0006952	ADP binding, defense response
Prupe.1G545600	-6.49083	2.01663e-06	2670	40S ribosomal protein S28-like	GO:0003735, GO:0006412, GO:0005840, GO:0022627, GO:0000028, GO:0030490	structural constituent of ribosome, translation, ribosome, cytosolic small ribosomal subunit, ribosomal small subunit assembly, maturation of SSU-rRNA
Prupe.6G080300	-4.24525	2.02682e-06	2682	CLAVATA3/ESR (CLE)-related protein 46	#N/A	#N/A
Prupe.4G035300	2.27804	2.03509e-06	735	---NA---	#N/A	#N/A
Prupe.2G170100	-3.52985	2.04084e-06	4749	transcription factor EGL1	GO:0005634, GO:0046983, GO:0048629	nucleus, protein dimerization activity, trichome patterning
Prupe.1G032700	8.84469	2.04429e-06	738	---NA---	GO:0004867, GO:0009611, GO:0010951, GO:0030414, GO:0010466	serine-type endopeptidase inhibitor activity, response to wounding, negative regulation of endopeptidase activity, peptidase inhibitor activity, negative regulation of peptidase activity
Prupe.6G267700	7.38708	2.09048e-06	4077	laccase-7	GO:0055114, GO:0016491, GO:0046872, GO:0005576, GO:0005507, GO:0052716, GO:0046274, GO:0048046	oxidation-reduction process, oxidoreductase activity, metal ion binding, extracellular region, copper ion binding, hydroquinone:oxygen oxidoreductase activity, lignin catabolic process, apoplast
Prupe.6G204000	-2.84282	2.1076e-06	2817	putative UDP-rhamnose:rhamnosyltransferase 1	#N/A	#N/A
Prupe.1G093600	9.63758	2.12289e-06	3881	(R)-mandelonitrile lyase 1-like	GO:0055114, GO:0050660, GO:0016829, GO:0016614, GO:0046593	oxidation-reduction process, flavin adenine dinucleotide binding, lyase activity, oxidoreductase activity, acting on CH-OH group of donors, mandelonitrile lyase activity
Prupe.2G278200	9.04589	2.12304e-06	2069	pectinesterase 2	GO:0016787, GO:0071555, GO:0005576, GO:0045490, GO:0004857, GO:0030599, GO:0045330, GO:0042545, GO:0043086, GO:0005618, GO:0046910	hydrolase activity, cell wall organization, extracellular region, pectin catabolic process, enzyme inhibitor activity, pectinesterase activity, aspartyl esterase activity, cell wall modification, negative regulation of catalytic activity, cell wall, pectinesterase inhibitor activity
Prupe.1G110100	-8.75537	2.14673e-06	5734	polygalacturonase At1g48100	GO:0005975, GO:0016787, GO:0004650, GO:0016798, GO:0008152, GO:0005618, GO:0005576, GO:0071555, GO:0009831	carbohydrate metabolic process, hydrolase activity, polygalacturonase activity, hydrolase activity, acting on glycosyl bonds, metabolic process, cell wall, extracellular region, cell wall organization, plant-type cell wall modification involved in multidimensional cell growth
Prupe.1G457800	-3.54677	2.14931e-06	4414	probable xyloglucan glycosyltransferase 5	GO:0016020, GO:0016021, GO:0005794, GO:0016757	membrane, integral component of membrane, Golgi apparatus, transferase activity, transferring glycosyl groups
Prupe.4G123000	2.82697	2.16072e-06	3683	probable leucine-rich repeat receptor-like protein kinase At1g35710	GO:0016020, GO:0016021, GO:0005515	membrane, integral component of membrane, protein binding
Prupe.8G209600	-10.4809	2.16479e-06	2145	GDSL esterase/lipase At4g28780	GO:0016788	hydrolase activity, acting on ester bonds
Prupe.1G251200	-4.695	2.17536e-06	4485	polygalacturonase At1g48100	GO:0005975, GO:0016787, GO:0004650, GO:0016798, GO:0008152, GO:0005618, GO:0005576, GO:0071555	carbohydrate metabolic process, hydrolase activity, polygalacturonase activity, hydrolase activity, acting on glycosyl bonds, metabolic process, cell wall, extracellular region, cell wall organization
Prupe.2G006000	5.15586	2.18862e-06	332	---NA---	#N/A	#N/A
Prupe.6G261400	2.70083	2.23886e-06	2886	L-type lectin-domain containing receptor kinase IV.1	GO:0005886, GO:0005524, GO:0000166, GO:0016301, GO:0016310, GO:0016020, GO:0016021, GO:0016740, GO:0030246, GO:0004672, GO:0006468, GO:0004674, GO:0007178, GO:0004675, GO:0002229, GO:0042742	plasma membrane, ATP binding, nucleotide binding, kinase activity, phosphorylation, membrane, integral component of membrane, transferase activity, carbohydrate binding, protein kinase activity, protein phosphorylation, protein serine/threonine kinase activity, transmembrane receptor protein serine/threonine kinase signaling pathway, transmembrane receptor protein serine/threonine kinase activity…
Prupe.1G211600	-4.09436	2.25525e-06	590	uncharacterized LOC18791736	#N/A	#N/A
Prupe.1G380300	-3.16315	2.26695e-06	2700	glucan endo-1,3-beta-D-glucosidase	GO:0005975, GO:0016787, GO:0016798, GO:0008152, GO:0004553, GO:0042973, GO:0046658	carbohydrate metabolic process, hydrolase activity, hydrolase activity, acting on glycosyl bonds, metabolic process, hydrolase activity, hydrolyzing O-glycosyl compounds, glucan endo-1,3-beta-D-glucosidase activity, anchored component of plasma membrane
Prupe.2G083500	-3.68437	2.28511e-06	3725	IQ domain-containing protein IQM3	GO:0005515	protein binding
Prupe.6G055100	-3.4355	2.29867e-06	6907	uncharacterized LOC18772239	GO:0016740, GO:0046872, GO:0008080	transferase activity, metal ion binding, N-acetyltransferase activity
Prupe.7G016000	-6.82505	2.29867e-06	3274	beta-glucuronosyltransferase GlcAT14A	GO:0016020, GO:0016021, GO:0016740, GO:0016757, GO:0008375	membrane, integral component of membrane, transferase activity, transferase activity, transferring glycosyl groups, acetylglucosaminyltransferase activity
Prupe.8G131900	-4.42849	2.33385e-06	2235	cyclin-D3-1	GO:0007049, GO:0051301, GO:0005634, GO:0009744, GO:0048316, GO:0010444, GO:0000082, GO:0009735, GO:0005737, GO:0000079, GO:0000307, GO:0016538, GO:0044772	cell cycle, cell division, nucleus, response to sucrose, seed development, guard mother cell differentiation, G1/S transition of mitotic cell cycle, response to cytokinin, cytoplasm, regulation of cyclin-dependent protein serine/threonine kinase activity, cyclin-dependent protein kinase holoenzyme complex, cyclin-dependent protein serine/threonine kinase regulator activity, mitotic cell cycle pha…
Prupe.2G310600	-2.46475	2.33663e-06	3694	---NA---	GO:0016787, GO:0016020, GO:0016021, GO:0045490, GO:0004857, GO:0030599, GO:0045330, GO:0042545, GO:0043086, GO:0005618, GO:0046910	hydrolase activity, membrane, integral component of membrane, pectin catabolic process, enzyme inhibitor activity, pectinesterase activity, aspartyl esterase activity, cell wall modification, negative regulation of catalytic activity, cell wall, pectinesterase inhibitor activity
Prupe.3G231900	-3.13487	2.36444e-06	5625	probable cyclic nucleotide-gated ion channel 20, chloroplastic	GO:0055085, GO:0016020, GO:0016021, GO:0005216, GO:0006811, GO:0034220	transmembrane transport, membrane, integral component of membrane, ion channel activity, ion transport, ion transmembrane transport
Prupe.1G374200	-2.28757	2.40683e-06	2188	transmembrane protein 136	GO:0016020, GO:0016021	membrane, integral component of membrane
Prupe.2G188500	-3.56305	2.40683e-06	5265	dynamin-related protein 1A	GO:0000166, GO:0003924, GO:0005525, GO:0016020, GO:0005737, GO:0008017, GO:0048285, GO:0000266	nucleotide binding, GTPase activity, GTP binding, membrane, cytoplasm, microtubule binding, organelle fission, mitochondrial fission
Prupe.3G222700	-6.65519	2.42556e-06	877	uncharacterized LOC109948174	#N/A	#N/A
Prupe.1G162700	3.42557	2.47857e-06	831	---NA---	#N/A	#N/A
Prupe.8G210200	2.62976	2.50015e-06	1068	probable glutathione S-transferase	GO:0006749, GO:0005737, GO:0004364, GO:0005515	glutathione metabolic process, cytoplasm, glutathione transferase activity, protein binding
Prupe.1G163800	2.25261	2.50268e-06	8606	---NA---	GO:0043531, GO:0006952	ADP binding, defense response
Prupe.6G341100	-3.06969	2.50268e-06	4355	serine/threonine-protein kinase Nek3	GO:0005524, GO:0000166, GO:0016301, GO:0016310, GO:0016740, GO:0004672, GO:0006468, GO:0004674	ATP binding, nucleotide binding, kinase activity, phosphorylation, transferase activity, protein kinase activity, protein phosphorylation, protein serine/threonine kinase activity
Prupe.3G032700	2.08402	2.51965e-06	2219	GDSL esterase/lipase 1	GO:0016788, GO:0016298	hydrolase activity, acting on ester bonds, lipase activity
Prupe.1G467600	7.64884	2.52263e-06	2612	gibberellin 3-beta-dioxygenase 1	GO:0055114, GO:0016491, GO:0046872, GO:0051213, GO:0009416, GO:0009686, GO:0016707	oxidation-reduction process, oxidoreductase activity, metal ion binding, dioxygenase activity, response to light stimulus, gibberellin biosynthetic process, gibberellin 3-beta-dioxygenase activity
Prupe.6G357200	4.46883	2.52328e-06	2668	wall-associated receptor kinase-like 1	GO:0005886, GO:0005524, GO:0000166, GO:0016301, GO:0016310, GO:0016020, GO:0016021, GO:0016740, GO:0004672, GO:0006468, GO:0004674, GO:0007166	plasma membrane, ATP binding, nucleotide binding, kinase activity, phosphorylation, membrane, integral component of membrane, transferase activity, protein kinase activity, protein phosphorylation, protein serine/threonine kinase activity, cell surface receptor signaling pathway
Prupe.8G107300	6.63692	2.5302e-06	1656	non-symbiotic hemoglobin	GO:0046872, GO:0020037, GO:0005344, GO:0019825, GO:0015671	metal ion binding, heme binding, oxygen carrier activity, oxygen binding, oxygen transport
Prupe.4G195500	-3.30111	2.53779e-06	1700	---NA---	GO:0005524, GO:0000166, GO:0016301, GO:0016310, GO:0016740, GO:0004672, GO:0006468, GO:0004674, GO:0048544, GO:0106310, GO:0106311	ATP binding, nucleotide binding, kinase activity, phosphorylation, transferase activity, protein kinase activity, protein phosphorylation, protein serine/threonine kinase activity, recognition of pollen, ,
Prupe.3G183900	-6.44816	2.55887e-06	874	---NA---	GO:0005634, GO:0005737, GO:0006511, GO:0051603, GO:0000502, GO:0005839, GO:0019773, GO:0004298, GO:0043161, GO:0004175, GO:0010499	nucleus, cytoplasm, ubiquitin-dependent protein catabolic process, proteolysis involved in cellular protein catabolic process, proteasome complex, proteasome core complex, proteasome core complex, alpha-subunit complex, threonine-type endopeptidase activity, proteasome-mediated ubiquitin-dependent protein catabolic process, endopeptidase activity, proteasomal ubiquitin-independent protein catabol…
Prupe.1G416900	-5.48665	2.60522e-06	2370	branched-chain-amino-acid aminotransferase 5, chloroplastic	GO:0003824, GO:0004084	catalytic activity, branched-chain-amino-acid transaminase activity
Prupe.4G247700	7.61829	2.61214e-06	1555	---NA---	GO:0010997, GO:0097027, GO:1904668	anaphase-promoting complex binding, ubiquitin-protein transferase activator activity, positive regulation of ubiquitin protein ligase activity
Prupe.5G113900	-2.81257	2.64729e-06	4204	probable inactive receptor kinase At4g23740	GO:0005524, GO:0016020, GO:0016021, GO:0004672, GO:0006468, GO:0005515	ATP binding, membrane, integral component of membrane, protein kinase activity, protein phosphorylation, protein binding
Prupe.2G251400	-2.8085	2.65046e-06	1803	1-aminocyclopropane-1-carboxylate oxidase 2	#N/A	#N/A
Prupe.1G098900	-3.74424	2.68823e-06	624	GPI-anchored CFEM domain protein A	#N/A	#N/A
Prupe.2G086100	3.59057	2.72474e-06	1310	---NA---	#N/A	#N/A
Prupe.4G199000	-8.69803	2.72474e-06	2255	(-)-alpha-pinene synthase-like	GO:0046872, GO:0000287, GO:0010333, GO:0016829	metal ion binding, magnesium ion binding, terpene synthase activity, lyase activity
Prupe.8G263900	2.81675	2.7442e-06	2624	probable pectinesterase/pectinesterase inhibitor 7	GO:0016787, GO:0045490, GO:0004857, GO:0030599, GO:0045330, GO:0042545, GO:0043086, GO:0005618, GO:0046910	hydrolase activity, pectin catabolic process, enzyme inhibitor activity, pectinesterase activity, aspartyl esterase activity, cell wall modification, negative regulation of catalytic activity, cell wall, pectinesterase inhibitor activity
Prupe.2G014100	-2.50605	2.75993e-06	3748	disease resistance protein RGA2-like	GO:0043531, GO:0006952, GO:0005515	ADP binding, defense response, protein binding
Prupe.1G048300	-2.58484	2.77823e-06	2033	cysteine-rich repeat secretory protein 3	GO:0016020, GO:0016021, GO:0009506, GO:0010497, GO:0046739	membrane, integral component of membrane, plasmodesma, plasmodesmata-mediated intercellular transport, transport of virus in multicellular host
Prupe.2G078100	3.68444	2.78312e-06	3830	receptor-like protein 12	GO:0016020, GO:0016021, GO:0005515	membrane, integral component of membrane, protein binding
Prupe.5G171500	-2.08377	2.78989e-06	1930	uncharacterized LOC18777847	GO:0030247	polysaccharide binding
Prupe.3G136500	-3.47808	2.8206e-06	1279	---NA---	GO:0016020, GO:0016021	membrane, integral component of membrane
Prupe.2G171800	-5.84351	2.84749e-06	1604	cytochrome P450 86A8	GO:0055114, GO:0016491, GO:0016020, GO:0016021, GO:0046872, GO:0004497, GO:0005506, GO:0016705, GO:0020037, GO:0018685, GO:0006631	oxidation-reduction process, oxidoreductase activity, membrane, integral component of membrane, metal ion binding, monooxygenase activity, iron ion binding, oxidoreductase activity, acting on paired donors, with incorporation or reduction of molecular oxygen, heme binding, alkane 1-monooxygenase activity, fatty acid metabolic process
Prupe.7G143900	-3.58069	2.84907e-06	3634	B3 domain-containing transcription factor VRN1	GO:0005634, GO:0003677, GO:0006355, GO:0006351	nucleus, DNA binding, regulation of transcription, DNA-templated, transcription, DNA-templated
Prupe.7G060200	-3.95727	2.86397e-06	1509	putative disease resistance protein RGA3	#N/A	#N/A
Prupe.7G246400	3.38088	2.86804e-06	1031	stellacyanin	GO:0016020, GO:0016021, GO:0009055, GO:0022900, GO:0046658	membrane, integral component of membrane, electron transfer activity, electron transport chain, anchored component of plasma membrane
Prupe.3G273900	3.28064	2.88794e-06	1550	AAA-ATPase ASD, mitochondrial	GO:0005524, GO:0000166, GO:0016020, GO:0016021, GO:0016887	ATP binding, nucleotide binding, membrane, integral component of membrane, ATPase activity
Prupe.1G156200	-2.81949	2.8915e-06	2186	mavicyanin	GO:0016020, GO:0016021, GO:0009055, GO:0022900, GO:0046658	membrane, integral component of membrane, electron transfer activity, electron transport chain, anchored component of plasma membrane
Prupe.4G106900	-3.68343	2.9022e-06	5400	protein ROOT HAIR DEFECTIVE 3 homolog 2	GO:0016020, GO:0005525, GO:0005783, GO:0016787, GO:0005789, GO:0003924, GO:0016320	membrane, GTP binding, endoplasmic reticulum, hydrolase activity, endoplasmic reticulum membrane, GTPase activity, endoplasmic reticulum membrane fusion
Prupe.1G185100	-6.22666	2.9144e-06	3389	uncharacterized LOC109946744	GO:0016020, GO:0016021	membrane, integral component of membrane
Prupe.1G387100	2.59321	2.91911e-06	2021	cytochrome P450 CYP82D47	GO:0055114, GO:0016491, GO:0016020, GO:0016021, GO:0046872, GO:0004497, GO:0005506, GO:0016705, GO:0020037, GO:0098542	oxidation-reduction process, oxidoreductase activity, membrane, integral component of membrane, metal ion binding, monooxygenase activity, iron ion binding, oxidoreductase activity, acting on paired donors, with incorporation or reduction of molecular oxygen, heme binding, defense response to other organism
Prupe.6G046800	-6.17087	2.93562e-06	2329	isoleucine N-monooxygenase 2	GO:0055114, GO:0016491, GO:0046872, GO:0004497, GO:0005506, GO:0016705, GO:0020037, GO:0016020, GO:0016709	oxidation-reduction process, oxidoreductase activity, metal ion binding, monooxygenase activity, iron ion binding, oxidoreductase activity, acting on paired donors, with incorporation or reduction of molecular oxygen, heme binding, membrane, oxidoreductase activity, acting on paired donors, with incorporation or reduction of molecular oxygen, NAD(P)H as one donor, and incorporation of one atom of…
Prupe.7G051200	3.21568	2.94682e-06	1437	---NA---	GO:0005576, GO:0006952	extracellular region, defense response
Prupe.8G047900	-3.07746	2.9659e-06	4529	putative laccase-9	GO:0055114, GO:0016491, GO:0046872, GO:0005576, GO:0005507, GO:0052716, GO:0046274, GO:0048046	oxidation-reduction process, oxidoreductase activity, metal ion binding, extracellular region, copper ion binding, hydroquinone:oxygen oxidoreductase activity, lignin catabolic process, apoplast
Prupe.3G074000	4.66334	2.98277e-06	753	---NA---	#N/A	#N/A
Prupe.6G141900	-7.81571	2.98277e-06	534	---NA---	#N/A	#N/A
Prupe.2G023900	4.33607	3.0126e-06	1396	---NA---	GO:0006508, GO:0004185, GO:0005773	proteolysis, serine-type carboxypeptidase activity, vacuole
Prupe.1G239900	-7.20783	3.02237e-06	2031	probable pectate lyase 5	GO:0046872, GO:0016829, GO:0030570, GO:0045490, GO:0005618	metal ion binding, lyase activity, pectate lyase activity, pectin catabolic process, cell wall
Prupe.4G015700	-2.06891	3.04916e-06	5779	protein STRUBBELIG-RECEPTOR FAMILY 8	GO:0005524, GO:0016020, GO:0016021, GO:0004672, GO:0006468, GO:0005515, GO:0005886	ATP binding, membrane, integral component of membrane, protein kinase activity, protein phosphorylation, protein binding, plasma membrane
Prupe.4G230400	9.8744	3.04916e-06	1592	berberine bridge enzyme-like 17	GO:0016491, GO:0055114, GO:0050660, GO:0071949	oxidoreductase activity, oxidation-reduction process, flavin adenine dinucleotide binding, FAD binding
Prupe.2G261100	-2.50455	3.05493e-06	1202	putative protein TPRXL	#N/A	#N/A
Prupe.8G023800	5.96134	3.08409e-06	4837	TMV resistance protein N	GO:0007165, GO:0016787, GO:0043531, GO:0006952, GO:0005515, GO:0050135, GO:0061809	signal transduction, hydrolase activity, ADP binding, defense response, protein binding, NAD(P)+ nucleosidase activity, NAD+ nucleotidase, cyclic ADP-ribose generating
Prupe.1G482300	-2.07931	3.08947e-06	4449	adenine phosphoribosyltransferase 5	GO:0005737, GO:0016740, GO:0016757, GO:0006166, GO:0009116, GO:0003999, GO:0006168, GO:0044209, GO:0005829	cytoplasm, transferase activity, transferase activity, transferring glycosyl groups, purine ribonucleoside salvage, nucleoside metabolic process, adenine phosphoribosyltransferase activity, adenine salvage, AMP salvage, cytosol
Prupe.1G346200	-4.26109	3.09187e-06	3914	probable metal-nicotianamine transporter YSL7	GO:0055085, GO:0016020, GO:0016021, GO:0005886	transmembrane transport, membrane, integral component of membrane, plasma membrane
Prupe.8G210700	7.40587	3.09707e-06	1155	glutathione transferase GST 23	GO:0006749, GO:0005737, GO:0004364, GO:0005515	glutathione metabolic process, cytoplasm, glutathione transferase activity, protein binding
Prupe.1G545100	6.62	3.19941e-06	1804	putative disease resistance RPP13-like protein 1	#N/A	#N/A
Prupe.2G235300	-4.0578	3.22497e-06	927	uncharacterized LOC18784873	#N/A	#N/A
Prupe.7G235300	-2.63272	3.23658e-06	7563	ABC transporter G family member 32	GO:0005524, GO:0000166, GO:0016020, GO:0016021, GO:0042626, GO:0055085, GO:0016887	ATP binding, nucleotide binding, membrane, integral component of membrane, ATPase-coupled transmembrane transporter activity, transmembrane transport, ATPase activity
Prupe.8G087800	-2.61516	3.2405e-06	10700	kinesin-like protein KIN-7D, mitochondrial	GO:0005524, GO:0000166, GO:0003774, GO:0003777, GO:0008017, GO:0007018, GO:0016887, GO:0005871, GO:0005874	ATP binding, nucleotide binding, motor activity, microtubule motor activity, microtubule binding, microtubule-based movement, ATPase activity, kinesin complex, microtubule
Prupe.4G126800	-3.27562	3.24129e-06	3628	NAC domain-containing protein 86	GO:0003677, GO:0006355, GO:0005634	DNA binding, regulation of transcription, DNA-templated, nucleus
Prupe.1G280400	-2.31801	3.30665e-06	5620	probable protein S-acyltransferase 22	GO:0016020, GO:0016021, GO:0016740, GO:0016746, GO:0019706, GO:0016409, GO:0018215, GO:0005783, GO:0005794, GO:0006612, GO:0018230	membrane, integral component of membrane, transferase activity, transferase activity, transferring acyl groups, protein-cysteine S-palmitoyltransferase activity, palmitoyltransferase activity, protein phosphopantetheinylation, endoplasmic reticulum, Golgi apparatus, protein targeting to membrane, peptidyl-L-cysteine S-palmitoylation
Prupe.6G204700	2.34482	3.33153e-06	3643	probable 1-deoxy-D-xylulose-5-phosphate synthase 2, chloroplastic	GO:0003824, GO:0016740, GO:0008661, GO:0016114, GO:0009228, GO:0008299, GO:0016744, GO:0052865	catalytic activity, transferase activity, 1-deoxy-D-xylulose-5-phosphate synthase activity, terpenoid biosynthetic process, thiamine biosynthetic process, isoprenoid biosynthetic process, transferase activity, transferring aldehyde or ketonic groups, 1-deoxy-D-xylulose 5-phosphate biosynthetic process
Prupe.4G215700	2.56138	3.40464e-06	1814	---NA---	#N/A	#N/A
Prupe.3G256100	-8.48268	3.4776e-06	1812	UDP-glycosyltransferase 83A1	GO:0016740, GO:0016758, GO:0008194, GO:0043231	transferase activity, transferase activity, transferring hexosyl groups, UDP-glycosyltransferase activity, intracellular membrane-bounded organelle
Prupe.7G096100	-3.42254	3.4776e-06	3169	UPF0481 protein At3g47200	GO:0016020, GO:0016021	membrane, integral component of membrane
Prupe.4G186700	-7.41795	3.47842e-06	3617	ABC transporter G family member 9	GO:0005524, GO:0000166, GO:0016020, GO:0016021, GO:0016887, GO:0042626, GO:0055085	ATP binding, nucleotide binding, membrane, integral component of membrane, ATPase activity, ATPase-coupled transmembrane transporter activity, transmembrane transport
Prupe.2G184900	-2.35293	3.49209e-06	2435	anthocyanidin reductase ((2S)-flavan-3-ol-forming)	GO:0003824, GO:0055114, GO:0050662, GO:0016616	catalytic activity, oxidation-reduction process, obsolete coenzyme binding, oxidoreductase activity, acting on the CH-OH group of donors, NAD or NADP as acceptor
Prupe.2G204700	-4.71384	3.58943e-06	1491	NAC domain-containing protein 86	GO:0003677, GO:0006355, GO:0005634	DNA binding, regulation of transcription, DNA-templated, nucleus
Prupe.1G502500	-8.21624	3.67321e-06	1493	flavonol synthase/flavanone 3-hydroxylase	GO:0055114, GO:0016491, GO:0046872, GO:0051213	oxidation-reduction process, oxidoreductase activity, metal ion binding, dioxygenase activity
Prupe.1G150700	-6.39385	3.72879e-06	1756	---NA---	GO:0005634, GO:0046983, GO:0003677, GO:0016020, GO:0016021, GO:0046872	nucleus, protein dimerization activity, DNA binding, membrane, integral component of membrane, metal ion binding
Prupe.1G104900	4.92984	3.73527e-06	2031	late embryogenesis abundant protein D-29	#N/A	#N/A
Prupe.6G151300	6.73248	3.73527e-06	897	---NA---	#N/A	#N/A
Prupe.1G437700	3.19966	3.91713e-06	2212	uncharacterized LOC109948827	#N/A	#N/A
Prupe.5G163700	4.19801	3.96495e-06	2093	cytochrome P450 71A1	GO:0055114, GO:0016491, GO:0046872, GO:0004497, GO:0005506, GO:0016705, GO:0020037	oxidation-reduction process, oxidoreductase activity, metal ion binding, monooxygenase activity, iron ion binding, oxidoreductase activity, acting on paired donors, with incorporation or reduction of molecular oxygen, heme binding
Prupe.5G023400	2.8237	3.96933e-06	3329	isoflavone reductase homolog	GO:0055114, GO:0016491	oxidation-reduction process, oxidoreductase activity
Prupe.2G198000	8.82794	4.0814e-06	4266	beta-glucosidase 12	GO:0005975, GO:0016787, GO:0016020, GO:0016021, GO:0004553, GO:0008422, GO:0009651, GO:0019762	carbohydrate metabolic process, hydrolase activity, membrane, integral component of membrane, hydrolase activity, hydrolyzing O-glycosyl compounds, beta-glucosidase activity, response to salt stress, glucosinolate catabolic process
Prupe.2G183500	-3.30917	4.12187e-06	910	arabinogalactan peptide 16	GO:0016020, GO:0016021	membrane, integral component of membrane
Prupe.3G184700	9.12699	4.20608e-06	1439	putative UDP-glucose flavonoid 3-O-glucosyltransferase 3	GO:0016740, GO:0016757, GO:0016758, GO:0008194	transferase activity, transferase activity, transferring glycosyl groups, transferase activity, transferring hexosyl groups, UDP-glycosyltransferase activity
Prupe.6G185800	6.65081	4.2421e-06	983	---NA---	GO:0005794, GO:0016020, GO:0016757, GO:0006486, GO:0000139	Golgi apparatus, membrane, transferase activity, transferring glycosyl groups, protein glycosylation, Golgi membrane
Prupe.1G392300	-3.1694	4.26727e-06	3344	U-box domain-containing protein 4	GO:0005515	protein binding
Prupe.2G065600	-2.21041	4.28235e-06	2849	inactive protein RESTRICTED TEV MOVEMENT 2	GO:0016020, GO:0016021	membrane, integral component of membrane
Prupe.4G169800	7.28455	4.28235e-06	2243	receptor-like protein 2	GO:0016020, GO:0016021, GO:0005515	membrane, integral component of membrane, protein binding
Prupe.1G019400	-2.18277	4.29654e-06	9227	protein NETWORKED 1B	GO:0003779, GO:0005886, GO:0051015	actin binding, plasma membrane, actin filament binding
Prupe.3G026700	-6.1859	4.38808e-06	5346	beta-amyrin synthase	GO:0016853, GO:0016866, GO:0005811, GO:0000250, GO:0042300, GO:0016104	isomerase activity, intramolecular transferase activity, lipid droplet, lanosterol synthase activity, beta-amyrin synthase activity, triterpenoid biosynthetic process
Prupe.4G041400	3.70156	4.39428e-06	1938	polyphenol oxidase, chloroplastic	GO:0055114, GO:0016491, GO:0046872, GO:0004097, GO:0046148	oxidation-reduction process, oxidoreductase activity, metal ion binding, catechol oxidase activity, pigment biosynthetic process
Prupe.1G231800	-6.33314	4.41242e-06	522	---NA---	#N/A	#N/A
Prupe.7G210400	-6.92631	4.48562e-06	2856	cyclic nucleotide-gated ion channel 1-like	GO:0016020, GO:0016021	membrane, integral component of membrane
Prupe.3G080000	-4.73018	4.5397e-06	2085	uncharacterized RNA-binding protein C17H9.04c	GO:0046872, GO:0003729	metal ion binding, mRNA binding
Prupe.2G222800	-6.3239	4.5546e-06	1099	---NA---	GO:0016020, GO:0016021	membrane, integral component of membrane
Prupe.8G007500	2.72662	4.55687e-06	725	oil body-associated protein 1A	#N/A	#N/A
Prupe.2G243600	2.45536	4.5909e-06	1535	UDP-glycosyltransferase 76F1	GO:0016740, GO:0016758, GO:0008194, GO:0080043, GO:0080044	transferase activity, transferase activity, transferring hexosyl groups, UDP-glycosyltransferase activity, quercetin 3-O-glucosyltransferase activity, quercetin 7-O-glucosyltransferase activity
Prupe.1G466000	-3.04865	4.64763e-06	4917	uncharacterized LOC18793772	GO:0005096, GO:0043547, GO:0046872	GTPase activator activity, positive regulation of GTPase activity, metal ion binding
Prupe.1G384600	4.55952	4.67642e-06	2370	type IV inositol polyphosphate 5-phosphatase 11	GO:0016787, GO:0046856, GO:0036092, GO:0009651, GO:0005886, GO:0004439, GO:0034485, GO:0009737, GO:0009733, GO:0046855, GO:0009753, GO:0043813	hydrolase activity, phosphatidylinositol dephosphorylation, phosphatidylinositol-3-phosphate biosynthetic process, response to salt stress, plasma membrane, phosphatidylinositol-4,5-bisphosphate 5-phosphatase activity, phosphatidylinositol-3,4,5-trisphosphate 5-phosphatase activity, response to abscisic acid, response to auxin, inositol phosphate dephosphorylation, response to jasmonic acid, phos…
Prupe.3G150600	4.14332	4.76648e-06	1008	uncharacterized LOC18782147	#N/A	#N/A
Prupe.7G112200	-2.74023	4.83977e-06	4046	protein ABSCISIC ACID-INSENSITIVE 5	GO:0005634, GO:0006355, GO:0003700, GO:0009737, GO:0045893	nucleus, regulation of transcription, DNA-templated, DNA-binding transcription factor activity, response to abscisic acid, positive regulation of transcription, DNA-templated
Prupe.2G218600	-2.08871	4.86711e-06	566	uncharacterized LOC18786550	#N/A	#N/A
Prupe.3G098100	2.16925	4.94444e-06	2367	probable WRKY transcription factor 40	GO:0005634, GO:0003677, GO:0006355, GO:0003700, GO:0043565, GO:0002237, GO:0009611, GO:0009751, GO:0010200, GO:0031347, GO:0042742, GO:0045892, GO:0050832	nucleus, DNA binding, regulation of transcription, DNA-templated, DNA-binding transcription factor activity, sequence-specific DNA binding, response to molecule of bacterial origin, response to wounding, response to salicylic acid, response to chitin, regulation of defense response, defense response to bacterium, negative regulation of transcription, DNA-templated, defense response to fungus
Prupe.2G083200	-6.63764	5.01558e-06	3901	disease resistance-like protein CSA1	GO:0007165, GO:0016787, GO:0043531, GO:0005515, GO:0050135, GO:0061809	signal transduction, hydrolase activity, ADP binding, protein binding, NAD(P)+ nucleosidase activity, NAD+ nucleotidase, cyclic ADP-ribose generating
Prupe.5G017900	6.44489	5.05415e-06	1380	methanol O-anthraniloyltransferase	GO:0016020, GO:0016021, GO:0016747	membrane, integral component of membrane, transferase activity, transferring acyl groups other than amino-acyl groups
Prupe.4G222000	-3.9546	5.08384e-06	1116	small ubiquitin-related modifier 2	GO:0005634, GO:0031386, GO:0016925, GO:0044389, GO:0005515	nucleus, protein tag, protein sumoylation, ubiquitin-like protein ligase binding, protein binding
Prupe.1G149500	-2.32675	5.18832e-06	4549	---NA---	GO:0016787	hydrolase activity
Prupe.8G129200	-2.05109	5.26631e-06	5645	filament-like plant protein 7	#N/A	#N/A
Prupe.6G298800	2.82669	5.27286e-06	2248	uncharacterized LOC18772050	#N/A	#N/A
Prupe.1G420800	2.61691	5.33981e-06	1038	uncharacterized LOC18790477	#N/A	#N/A
Prupe.4G086300	-2.01904	5.37554e-06	4334	CSC1-like protein ERD4	GO:0016020, GO:0016021, GO:0006811, GO:0034220, GO:0098655, GO:0005886, GO:0005774, GO:0009506, GO:0009941, GO:0005227, GO:0003729, GO:0005773	membrane, integral component of membrane, ion transport, ion transmembrane transport, cation transmembrane transport, plasma membrane, vacuolar membrane, plasmodesma, chloroplast envelope, calcium activated cation channel activity, mRNA binding, vacuole
Prupe.7G144800	-3.09844	5.37554e-06	1722	---NA---	#N/A	#N/A
Prupe.1G084900	-3.0972	5.38781e-06	3780	AP2-like ethylene-responsive transcription factor AIL5	GO:0005634, GO:0003677, GO:0006355, GO:0003700, GO:0006351	nucleus, DNA binding, regulation of transcription, DNA-templated, DNA-binding transcription factor activity, transcription, DNA-templated
Prupe.2G033700	-2.22771	5.43875e-06	2157	heavy metal-associated isoprenylated plant protein 3	#N/A	#N/A
Prupe.1G315100	-6.80854	5.44134e-06	849	rust resistance kinase Lr10	GO:0005524, GO:0004672, GO:0006468	ATP binding, protein kinase activity, protein phosphorylation
Prupe.8G065600	4.75736	5.47733e-06	422	classical arabinogalactan protein 9-like	#N/A	#N/A
Prupe.1G256700	-4.07699	5.50366e-06	1962	uncharacterized LOC18791407	#N/A	#N/A
Prupe.4G097000	8.97993	5.57621e-06	1589	berberine bridge enzyme-like 26	GO:0016491, GO:0055114, GO:0050660, GO:0071949	oxidoreductase activity, oxidation-reduction process, flavin adenine dinucleotide binding, FAD binding
Prupe.8G027300	-2.04678	5.57621e-06	3658	TMV resistance protein N	GO:0007165, GO:0016787, GO:0043531, GO:0005515, GO:0050135, GO:0061809	signal transduction, hydrolase activity, ADP binding, protein binding, NAD(P)+ nucleosidase activity, NAD+ nucleotidase, cyclic ADP-ribose generating
Prupe.8G111700	-6.21199	5.57621e-06	1282	TMV resistance protein N	GO:0043531	ADP binding
Prupe.8G155300	-7.71126	5.66312e-06	3414	putative branched-chain-amino-acid aminotransferase 7	GO:0003824, GO:0016740, GO:0008483, GO:0008652, GO:0009082, GO:0004084, GO:0052654, GO:0052655, GO:0052656, GO:0009081, GO:0005829	catalytic activity, transferase activity, transaminase activity, cellular amino acid biosynthetic process, branched-chain amino acid biosynthetic process, branched-chain-amino-acid transaminase activity, L-leucine transaminase activity, L-valine transaminase activity, L-isoleucine transaminase activity, branched-chain amino acid metabolic process, cytosol
Prupe.4G269600	-2.3087	5.6966e-06	2853	cyclin-B1-4	GO:0007049, GO:0051301, GO:0005634, GO:0005737, GO:0000079, GO:0000307, GO:0016538, GO:0044772	cell cycle, cell division, nucleus, cytoplasm, regulation of cyclin-dependent protein serine/threonine kinase activity, cyclin-dependent protein kinase holoenzyme complex, cyclin-dependent protein serine/threonine kinase regulator activity, mitotic cell cycle phase transition
Prupe.4G163500	4.05392	5.71957e-06	2434	tyrosine-sulfated glycopeptide receptor 1	GO:0016020, GO:0016021, GO:0005515	membrane, integral component of membrane, protein binding
Prupe.1G148600	-2.85707	5.78179e-06	1810	uncharacterized LOC18789575	GO:0016020, GO:0016021	membrane, integral component of membrane
Prupe.6G134800	-2.09391	5.84796e-06	1066	---NA---	GO:0005794, GO:0016020, GO:0016021, GO:0000139, GO:0072657, GO:0010008	Golgi apparatus, membrane, integral component of membrane, Golgi membrane, protein localization to membrane, endosome membrane
Prupe.7G185200	-2.44822	5.85546e-06	5907	protein PIN-LIKES 7	GO:0055085, GO:0016020, GO:0016021, GO:0009734	transmembrane transport, membrane, integral component of membrane, auxin-activated signaling pathway
Prupe.3G224900	2.23065	5.89912e-06	3736	G-type lectin S-receptor-like serine/threonine-protein kinase At4g27290	GO:0005524, GO:0000166, GO:0016301, GO:0016310, GO:0016020, GO:0016021, GO:0016740, GO:0004672, GO:0006468, GO:0004674, GO:0048544, GO:0005886, GO:0106310, GO:0106311	ATP binding, nucleotide binding, kinase activity, phosphorylation, membrane, integral component of membrane, transferase activity, protein kinase activity, protein phosphorylation, protein serine/threonine kinase activity, recognition of pollen, plasma membrane, ,
Prupe.1G168400	-7.09666	6.0574e-06	3116	receptor-like kinase TMK4	GO:0005524, GO:0000166, GO:0016301, GO:0016310, GO:0016020, GO:0016021, GO:0016740, GO:0004672, GO:0006468, GO:0004674, GO:0005515	ATP binding, nucleotide binding, kinase activity, phosphorylation, membrane, integral component of membrane, transferase activity, protein kinase activity, protein phosphorylation, protein serine/threonine kinase activity, protein binding
Prupe.8G235400	-2.67577	6.06418e-06	3375	uncharacterized LOC18768882	GO:0016020, GO:0016021, GO:0005515	membrane, integral component of membrane, protein binding
Prupe.4G111000	2.17068	6.06991e-06	1823	---NA---	GO:0016020, GO:0016021	membrane, integral component of membrane
Prupe.1G377800	-3.07493	6.07128e-06	2833	proteoglycan 4	#N/A	#N/A
Prupe.6G201900	-7.47572	6.09268e-06	4288	protein NETWORKED 2D	GO:0003779	actin binding
Prupe.1G032000	8.63147	6.20863e-06	442	---NA---	GO:0004867, GO:0009611, GO:0010951, GO:0030414, GO:0010466	serine-type endopeptidase inhibitor activity, response to wounding, negative regulation of endopeptidase activity, peptidase inhibitor activity, negative regulation of peptidase activity
Prupe.1G283400	-2.29259	6.20863e-06	5574	alpha-1,4 glucan phosphorylase L-2 isozyme, chloroplastic/amyloplastic	GO:0005975, GO:0016740, GO:0030170, GO:0016757, GO:0004645, GO:0008184, GO:0102250, GO:0102499, GO:0005737, GO:0005980	carbohydrate metabolic process, transferase activity, pyridoxal phosphate binding, transferase activity, transferring glycosyl groups, 1,4-alpha-oligoglucan phosphorylase activity, glycogen phosphorylase activity, linear malto-oligosaccharide phosphorylase activity, SHG alpha-glucan phosphorylase activity, cytoplasm, glycogen catabolic process
Prupe.2G138900	-6.34523	6.22946e-06	3011	---NA---	GO:0005515	protein binding
Prupe.5G188200	-2.805	6.27365e-06	2560	uncharacterized LOC18776914	#N/A	#N/A
Prupe.8G233400	-5.08548	6.30431e-06	3951	protein LONGIFOLIA 1	GO:0051513	regulation of monopolar cell growth
Prupe.5G242500	-2.73058	6.45221e-06	2144	blue copper protein	GO:0016020, GO:0016021, GO:0009055, GO:0022900, GO:0046658	membrane, integral component of membrane, electron transfer activity, electron transport chain, anchored component of plasma membrane
Prupe.6G197900	5.33923	6.45221e-06	563	---NA---	#N/A	#N/A
Prupe.5G191200	-2.01816	6.46648e-06	1244	transcription factor TCP15	GO:0005634, GO:0003700, GO:0006355, GO:0003677, GO:0006351, GO:0043565	nucleus, DNA-binding transcription factor activity, regulation of transcription, DNA-templated, DNA binding, transcription, DNA-templated, sequence-specific DNA binding
Prupe.4G034400	-6.78091	6.53517e-06	2050	putative cyclin-D6-1	GO:0007049, GO:0051301, GO:0005634, GO:0051726, GO:0005737, GO:0000079, GO:0000307, GO:0016538, GO:0044772	cell cycle, cell division, nucleus, regulation of cell cycle, cytoplasm, regulation of cyclin-dependent protein serine/threonine kinase activity, cyclin-dependent protein kinase holoenzyme complex, cyclin-dependent protein serine/threonine kinase regulator activity, mitotic cell cycle phase transition
Prupe.8G197800	-7.77489	6.73007e-06	1340	uncharacterized LOC18767682	GO:0046872	metal ion binding
Prupe.4G048000	-2.42983	6.7309e-06	4456	uncharacterized LOC18778966	GO:0016020, GO:0016021, GO:0016811, GO:0006672	membrane, integral component of membrane, hydrolase activity, acting on carbon-nitrogen (but not peptide) bonds, in linear amides, ceramide metabolic process
Prupe.1G383700	-3.76452	6.92337e-06	1257	---NA---	GO:0006952, GO:0005576	defense response, extracellular region
Prupe.4G167100	-2.08204	6.93591e-06	2957	---NA---	GO:0003824, GO:0016765, GO:0016740, GO:0071555, GO:0007049, GO:0051301, GO:0008760, GO:0019277, GO:0008360	catalytic activity, transferase activity, transferring alkyl or aryl (other than methyl) groups, transferase activity, cell wall organization, cell cycle, cell division, UDP-N-acetylglucosamine 1-carboxyvinyltransferase activity, UDP-N-acetylgalactosamine biosynthetic process, regulation of cell shape
Prupe.4G193200	-6.1466	6.93882e-06	3362	uncharacterized LOC18780125	GO:0005524, GO:0000166, GO:0016301, GO:0016310, GO:0016020, GO:0016021, GO:0016740, GO:0004672, GO:0006468, GO:0004674, GO:0048544, GO:0005886, GO:0106310, GO:0106311	ATP binding, nucleotide binding, kinase activity, phosphorylation, membrane, integral component of membrane, transferase activity, protein kinase activity, protein phosphorylation, protein serine/threonine kinase activity, recognition of pollen, plasma membrane, ,
Prupe.8G077400	2.77031	6.94925e-06	593	---NA---	GO:0016020, GO:0016021	membrane, integral component of membrane
Prupe.7G163100	-2.36482	6.96228e-06	6929	beta-galactosidase 3	GO:0005975, GO:0016787, GO:0030246, GO:0016798, GO:0008152, GO:0005576, GO:0004553, GO:0004565, GO:0048046, GO:0009505, GO:0005773, GO:0005618	carbohydrate metabolic process, hydrolase activity, carbohydrate binding, hydrolase activity, acting on glycosyl bonds, metabolic process, extracellular region, hydrolase activity, hydrolyzing O-glycosyl compounds, beta-galactosidase activity, apoplast, plant-type cell wall, vacuole, cell wall
Prupe.6G106200	-2.79697	7.02581e-06	7346	uncharacterized LOC18772343	GO:0005634, GO:0003677, GO:0016020, GO:0016021	nucleus, DNA binding, membrane, integral component of membrane
Prupe.8G112100	2.52466	7.06999e-06	6145	TMV resistance protein N	GO:0007165, GO:0016787, GO:0043531, GO:0006952, GO:0005515, GO:0050135, GO:0061809	signal transduction, hydrolase activity, ADP binding, defense response, protein binding, NAD(P)+ nucleosidase activity, NAD+ nucleotidase, cyclic ADP-ribose generating
Prupe.8G100900	2.92563	7.0751e-06	3168	---NA---	GO:0055085, GO:0016020, GO:0016021, GO:0022857	transmembrane transport, membrane, integral component of membrane, transmembrane transporter activity
Prupe.6G015900	-9.50552	7.09003e-06	1448	UDP-glycosyltransferase 92A1	GO:0016740, GO:0016757, GO:0016758, GO:0008194	transferase activity, transferase activity, transferring glycosyl groups, transferase activity, transferring hexosyl groups, UDP-glycosyltransferase activity
Prupe.8G093400	-5.07694	7.13245e-06	2995	---NA---	GO:0000166, GO:0005524, GO:0009058, GO:0009507, GO:0016779, GO:0008878, GO:0005978	nucleotide binding, ATP binding, biosynthetic process, chloroplast, nucleotidyltransferase activity, glucose-1-phosphate adenylyltransferase activity, glycogen biosynthetic process
Prupe.2G086300	-3.26818	7.15857e-06	1558	cytochrome P450 77A3	GO:0055114, GO:0016491, GO:0016020, GO:0016021, GO:0046872, GO:0004497, GO:0005506, GO:0016705, GO:0020037, GO:0016709	oxidation-reduction process, oxidoreductase activity, membrane, integral component of membrane, metal ion binding, monooxygenase activity, iron ion binding, oxidoreductase activity, acting on paired donors, with incorporation or reduction of molecular oxygen, heme binding, oxidoreductase activity, acting on paired donors, with incorporation or reduction of molecular oxygen, NAD(P)H as one donor, …
Prupe.3G267600	-6.13381	7.1792e-06	1143	gibberellin-regulated protein 4	#N/A	#N/A
Prupe.4G125700	-4.32171	7.22956e-06	3051	uncharacterized LOC18779140	GO:0003824, GO:0006281, GO:0006284, GO:0008725	catalytic activity, DNA repair, base-excision repair, DNA-3-methyladenine glycosylase activity
Prupe.2G197200	-4.55764	7.23342e-06	3183	RNA-binding protein 24-B	GO:0003676, GO:0003723, GO:0003729	nucleic acid binding, RNA binding, mRNA binding
Prupe.3G235900	5.53144	7.25379e-06	776	uncharacterized LOC18784430	#N/A	#N/A
Prupe.1G036400	7.13287	7.26217e-06	2395	1-aminocyclopropane-1-carboxylate oxidase homolog 1	GO:0055114, GO:0016491, GO:0046872	oxidation-reduction process, oxidoreductase activity, metal ion binding
Prupe.6G151500	-3.10864	7.27216e-06	2100	protein RESTRICTED TEV MOVEMENT 2	GO:0016020, GO:0016021	membrane, integral component of membrane
Prupe.1G397700	2.27798	7.29752e-06	1967	aspartyl protease family protein At5g10770	GO:0016787, GO:0004190, GO:0008233, GO:0006508	hydrolase activity, aspartic-type endopeptidase activity, peptidase activity, proteolysis
Prupe.2G006800	2.48572	7.30354e-06	1022	---NA---	#N/A	#N/A
Prupe.6G271500	-3.33331	7.37573e-06	3190	laccase-4	GO:0055114, GO:0016491, GO:0046872, GO:0005576, GO:0005507, GO:0052716, GO:0046274, GO:0048046	oxidation-reduction process, oxidoreductase activity, metal ion binding, extracellular region, copper ion binding, hydroquinone:oxygen oxidoreductase activity, lignin catabolic process, apoplast
Prupe.7G120500	-3.19194	7.40244e-06	2755	leucine-rich repeat receptor-like protein kinase PXC1	GO:0005524, GO:0016020, GO:0016021, GO:0004672, GO:0006468, GO:0009834, GO:0005886	ATP binding, membrane, integral component of membrane, protein kinase activity, protein phosphorylation, plant-type secondary cell wall biogenesis, plasma membrane
Prupe.2G271100	-3.32933	7.42203e-06	1965	cyclin-U4-1	GO:0019901, GO:0000079	protein kinase binding, regulation of cyclin-dependent protein serine/threonine kinase activity
Prupe.7G057100	11.3838	7.42203e-06	765	uncharacterized LOC18769120	GO:0008289	lipid binding
Prupe.3G256400	-4.94762	7.43569e-06	235	---NA---	#N/A	#N/A
Prupe.1G577800	-2.14952	7.57351e-06	1554	metallothiol transferase FosB	#N/A	#N/A
Prupe.6G297900	-2.31227	7.64599e-06	2883	uncharacterized LOC18774299	GO:0016020, GO:0016021	membrane, integral component of membrane
Prupe.8G188800	2.48953	7.65914e-06	1598	calmodulin-like protein 3	GO:0005509, GO:0005777	calcium ion binding, peroxisome
Prupe.1G164800	-2.64491	7.89257e-06	2259	UDP-glucuronate 4-epimerase 6	GO:0016020, GO:0016021, GO:0016857, GO:0005975, GO:0050662	membrane, integral component of membrane, racemase and epimerase activity, acting on carbohydrates and derivatives, carbohydrate metabolic process, obsolete coenzyme binding
Prupe.4G232400	2.94173	8.12019e-06	3532	LRR receptor-like serine/threonine-protein kinase GSO2	GO:0005515	protein binding
Prupe.7G226800	-3.24415	8.18467e-06	2485	uncharacterized LOC18769312	#N/A	#N/A
Prupe.7G133500	2.51521	8.22228e-06	179	---NA---	GO:0016020, GO:0016021	membrane, integral component of membrane
Prupe.6G013200	-7.38121	8.25774e-06	2059	peroxidase A2	GO:0055114, GO:0016491, GO:0046872, GO:0005576, GO:0020037, GO:0004601, GO:0098869, GO:0006979, GO:0042744	oxidation-reduction process, oxidoreductase activity, metal ion binding, extracellular region, heme binding, peroxidase activity, cellular oxidant detoxification, response to oxidative stress, hydrogen peroxide catabolic process
Prupe.3G234900	-14.0831	8.3053e-06	747	putative cell wall protein	#N/A	#N/A
Prupe.4G004300	-4.58955	8.32966e-06	2978	uncharacterized LOC18780905	#N/A	#N/A
Prupe.2G066300	-7.02947	8.42336e-06	1286	---NA---	GO:0016020, GO:0016021, GO:0055114, GO:0016627, GO:0006629, GO:0005737, GO:0016491	membrane, integral component of membrane, oxidation-reduction process, oxidoreductase activity, acting on the CH-CH group of donors, lipid metabolic process, cytoplasm, oxidoreductase activity
Prupe.8G186100	-3.45619	8.67248e-06	2045	UDP-glycosyltransferase 74E2	GO:0016740, GO:0016757, GO:0016758, GO:0008194, GO:0080043, GO:0080044	transferase activity, transferase activity, transferring glycosyl groups, transferase activity, transferring hexosyl groups, UDP-glycosyltransferase activity, quercetin 3-O-glucosyltransferase activity, quercetin 7-O-glucosyltransferase activity
Prupe.8G099400	-6.87961	8.67627e-06	1113	organ-specific protein S2	#N/A	#N/A
Prupe.2G010800	-7.97085	8.72588e-06	1679	anthocyanin 5-aromatic acyltransferase	GO:0016747	transferase activity, transferring acyl groups other than amino-acyl groups
Prupe.1G525500	7.3317	8.76454e-06	1499	extensin-like	GO:0016020, GO:0016021	membrane, integral component of membrane
Prupe.5G012200	-6.04508	8.77576e-06	3130	---NA---	#N/A	#N/A
Prupe.5G194800	2.77215	9.00715e-06	1101	probable calcium-binding protein CML45	GO:0016020, GO:0016021, GO:0005509	membrane, integral component of membrane, calcium ion binding
Prupe.5G214000	-2.20386	9.02254e-06	1107	uncharacterized LOC18777859	GO:0016020, GO:0016021	membrane, integral component of membrane
Prupe.3G040900	7.19311	9.05159e-06	2836	uncharacterized LOC18783431	GO:0016020, GO:0016021	membrane, integral component of membrane
Prupe.3G296200	-2.15797	9.05159e-06	3188	glycerol-3-phosphate dehydrogenase [NAD(+)]	GO:0055114, GO:0016491, GO:0016616, GO:0005975, GO:0051287, GO:0004367, GO:0006072, GO:0046168, GO:0009331, GO:0042803, GO:0005829, GO:0006116	oxidation-reduction process, oxidoreductase activity, oxidoreductase activity, acting on the CH-OH group of donors, NAD or NADP as acceptor, carbohydrate metabolic process, NAD binding, glycerol-3-phosphate dehydrogenase [NAD+] activity, glycerol-3-phosphate metabolic process, glycerol-3-phosphate catabolic process, glycerol-3-phosphate dehydrogenase complex, protein homodimerization activity, cy…
Prupe.6G179300	-3.90266	9.11008e-06	1101	heavy metal-associated isoprenylated plant protein 23	GO:0046872, GO:0030001	metal ion binding, metal ion transport
Prupe.3G190400	4.38226	9.16995e-06	1951	7-deoxyloganetin glucosyltransferase-like	GO:0016740, GO:0016757, GO:0016758, GO:0008194, GO:0080043, GO:0080044	transferase activity, transferase activity, transferring glycosyl groups, transferase activity, transferring hexosyl groups, UDP-glycosyltransferase activity, quercetin 3-O-glucosyltransferase activity, quercetin 7-O-glucosyltransferase activity
Prupe.4G104500	-2.53858	9.19932e-06	14727	probable LRR receptor-like serine/threonine-protein kinase At1g56130	GO:0005524, GO:0016020, GO:0016021, GO:0004672, GO:0006468, GO:0005886, GO:0004674, GO:0046777, GO:0005515, GO:0106310, GO:0106311	ATP binding, membrane, integral component of membrane, protein kinase activity, protein phosphorylation, plasma membrane, protein serine/threonine kinase activity, protein autophosphorylation, protein binding, ,
Prupe.5G138800	-4.60095	9.23331e-06	1498	---NA---	#N/A	#N/A
Prupe.3G026800	4.5191	9.2355e-06	5311	beta-amyrin synthase	GO:0016853, GO:0016866, GO:0005811, GO:0000250, GO:0042300, GO:0016104	isomerase activity, intramolecular transferase activity, lipid droplet, lanosterol synthase activity, beta-amyrin synthase activity, triterpenoid biosynthetic process
Prupe.7G102000	4.10352	9.29419e-06	1909	NAC domain-containing protein 90	GO:0003677, GO:0006355, GO:0005634	DNA binding, regulation of transcription, DNA-templated, nucleus
Prupe.6G310900	6.11968	9.34142e-06	595	uncharacterized LOC109949773	GO:0016020, GO:0016021	membrane, integral component of membrane
Prupe.2G230300	-6.04365	9.38383e-06	4823	2-oxoglutarate dehydrogenase, mitochondrial	GO:0055114, GO:0016491, GO:0006099, GO:0030976, GO:0016624, GO:0004591, GO:0005739, GO:0045252	oxidation-reduction process, oxidoreductase activity, tricarboxylic acid cycle, thiamine pyrophosphate binding, oxidoreductase activity, acting on the aldehyde or oxo group of donors, disulfide as acceptor, oxoglutarate dehydrogenase (succinyl-transferring) activity, mitochondrion, oxoglutarate dehydrogenase complex
Prupe.3G009900	-6.45261	9.40836e-06	792	---NA---	GO:0009507	chloroplast
Prupe.6G132100	-6.0212	9.57681e-06	3704	uncharacterized LOC18772595	GO:0007165, GO:0016787, GO:0043531, GO:0006952, GO:0005515, GO:0050135, GO:0061809	signal transduction, hydrolase activity, ADP binding, defense response, protein binding, NAD(P)+ nucleosidase activity, NAD+ nucleotidase, cyclic ADP-ribose generating
Prupe.6G170900	6.62826	9.64233e-06	2221	---NA---	#N/A	#N/A
Prupe.4G146000	-3.05372	9.66839e-06	1239	probable glutathione S-transferase parC	GO:0006749, GO:0005737, GO:0004364, GO:0005515	glutathione metabolic process, cytoplasm, glutathione transferase activity, protein binding
Prupe.1G312200	2.62723	9.69334e-06	2477	caffeoylshikimate esterase	, GO:0016020, GO:0016298	, membrane, lipase activity
Prupe.6G049900	2.107	9.74046e-06	476	---NA---	#N/A	#N/A
Prupe.1G032400	8.6181	9.90136e-06	588	glu S.griseus protease inhibitor	GO:0004867, GO:0009611, GO:0010951, GO:0030414, GO:0010466	serine-type endopeptidase inhibitor activity, response to wounding, negative regulation of endopeptidase activity, peptidase inhibitor activity, negative regulation of peptidase activity
Prupe.8G205300	4.24641	1.00694e-05	546	---NA---	GO:0016020, GO:0016021	membrane, integral component of membrane
Prupe.4G142400	2.44873	1.00709e-05	9353	G-type lectin S-receptor-like serine/threonine-protein kinase At4g27290	GO:0005524, GO:0000166, GO:0016301, GO:0016310, GO:0016020, GO:0016021, GO:0016740, GO:0004672, GO:0006468, GO:0004674, GO:0048544, GO:0005886, GO:0031625, GO:0106310, GO:0106311	ATP binding, nucleotide binding, kinase activity, phosphorylation, membrane, integral component of membrane, transferase activity, protein kinase activity, protein phosphorylation, protein serine/threonine kinase activity, recognition of pollen, plasma membrane, ubiquitin protein ligase binding, ,
Prupe.2G180700	-2.2974	1.00736e-05	1735	uncharacterized LOC109947065	#N/A	#N/A
Prupe.8G197500	2.80224	1.05836e-05	1932	uncharacterized LOC18767783	GO:0007165, GO:0005634, GO:0045892	signal transduction, nucleus, negative regulation of transcription, DNA-templated
Prupe.8G142900	4.15277	1.07038e-05	2534	sorbitol dehydrogenase	GO:0055114, GO:0016491, GO:0046872, GO:0008270	oxidation-reduction process, oxidoreductase activity, metal ion binding, zinc ion binding
Prupe.7G085600	-6.13412	1.07096e-05	362	---NA---	GO:0071568, GO:1990592, GO:0018215	UFM1 transferase activity, protein K69-linked ufmylation, protein phosphopantetheinylation
Prupe.1G256600	-2.52538	1.08433e-05	1824	RING-H2 finger protein ATL46	GO:0016020, GO:0016021, GO:0016567, GO:0031625	membrane, integral component of membrane, protein ubiquitination, ubiquitin protein ligase binding
Prupe.8G121700	3.70225	1.09375e-05	947	probable carboxylesterase 12	GO:0016787	hydrolase activity
Prupe.5G221500	-2.89504	1.10661e-05	3366	uncharacterized LOC18776556	GO:0003735, GO:0006412, GO:0005840, GO:0016020, GO:0016021	structural constituent of ribosome, translation, ribosome, membrane, integral component of membrane
Prupe.3G086200	-3.54832	1.10804e-05	2228	glucan endo-1,3-beta-glucosidase 14	GO:0005975, GO:0016787, GO:0016798, GO:0008152, GO:0004553, GO:0042973, GO:0046658	carbohydrate metabolic process, hydrolase activity, hydrolase activity, acting on glycosyl bonds, metabolic process, hydrolase activity, hydrolyzing O-glycosyl compounds, glucan endo-1,3-beta-D-glucosidase activity, anchored component of plasma membrane
Prupe.8G218300	-3.15113	1.12276e-05	2632	protein NRT1/ PTR FAMILY 5.2	GO:0055085, GO:0016020, GO:0016021, GO:0022857	transmembrane transport, membrane, integral component of membrane, transmembrane transporter activity
Prupe.7G178000	-2.85788	1.13099e-05	3177	uncharacterized LOC18770337	GO:0015031, GO:0008104	protein transport, protein localization
Prupe.1G536700	-2.44043	1.15064e-05	6163	probable rhamnogalacturonate lyase B	GO:0003824, GO:0005975, GO:0030246, GO:0016829, GO:0005576, GO:0102210	catalytic activity, carbohydrate metabolic process, carbohydrate binding, lyase activity, extracellular region, rhamnogalacturonan endolyase activity
Prupe.3G206100	-2.19118	1.15964e-05	2960	protein IQ-DOMAIN 1	GO:0016020, GO:0016021, GO:0005515	membrane, integral component of membrane, protein binding
Prupe.3G197500	-2.38908	1.17397e-05	3506	SNF1-related protein kinase regulatory subunit beta-2	GO:0005515	protein binding
Prupe.8G261300	-4.01534	1.17397e-05	965	21 kDa protein	GO:0004857, GO:0043086	enzyme inhibitor activity, negative regulation of catalytic activity
Prupe.7G165500	2.16015	1.17691e-05	2268	AAA-ATPase At2g18193	GO:0005524, GO:0000166, GO:0016887	ATP binding, nucleotide binding, ATPase activity
Prupe.1G375400	6.42391	1.18443e-05	1278	---NA---	#N/A	#N/A
Prupe.6G266600	6.93941	1.18575e-05	1803	7-deoxyloganetic acid glucosyltransferase	GO:0016740, GO:0016757, GO:0016758, GO:0008194	transferase activity, transferase activity, transferring glycosyl groups, transferase activity, transferring hexosyl groups, UDP-glycosyltransferase activity
Prupe.5G169700	-2.94388	1.19809e-05	4579	probable LRR receptor-like serine/threonine-protein kinase At4g26540	GO:0005524, GO:0000166, GO:0016301, GO:0016310, GO:0016020, GO:0016021, GO:0016740, GO:0004672, GO:0006468, GO:0004674, GO:0005886, GO:0005515	ATP binding, nucleotide binding, kinase activity, phosphorylation, membrane, integral component of membrane, transferase activity, protein kinase activity, protein phosphorylation, protein serine/threonine kinase activity, plasma membrane, protein binding
Prupe.2G167500	3.94214	1.2037e-05	2900	---NA---	GO:0016020, GO:0016021, GO:0005515	membrane, integral component of membrane, protein binding
Prupe.3G116700	-6.1417	1.22458e-05	3028	uncharacterized LOC18782555	GO:0005634, GO:0003677	nucleus, DNA binding
Prupe.1G292500	3.65862	1.2252e-05	5228	cytochrome P450 CYP749A22	GO:0055114, GO:0016491, GO:0016020, GO:0016021, GO:0046872, GO:0004497, GO:0005506, GO:0016705, GO:0020037	oxidation-reduction process, oxidoreductase activity, membrane, integral component of membrane, metal ion binding, monooxygenase activity, iron ion binding, oxidoreductase activity, acting on paired donors, with incorporation or reduction of molecular oxygen, heme binding
Prupe.4G195400	2.05677	1.22628e-05	3650	---NA---	GO:0005524, GO:0000166, GO:0016301, GO:0016310, GO:0016020, GO:0016021, GO:0016740, GO:0004672, GO:0006468, GO:0004674, GO:0048544, GO:0005886, GO:0031625, GO:0106310, GO:0106311	ATP binding, nucleotide binding, kinase activity, phosphorylation, membrane, integral component of membrane, transferase activity, protein kinase activity, protein phosphorylation, protein serine/threonine kinase activity, recognition of pollen, plasma membrane, ubiquitin protein ligase binding, ,
Prupe.5G164000	-2.25888	1.22961e-05	2099	cytochrome P450 71A1-like	GO:0055114, GO:0016491, GO:0016020, GO:0016021, GO:0046872, GO:0004497, GO:0005506, GO:0016705, GO:0020037	oxidation-reduction process, oxidoreductase activity, membrane, integral component of membrane, metal ion binding, monooxygenase activity, iron ion binding, oxidoreductase activity, acting on paired donors, with incorporation or reduction of molecular oxygen, heme binding
Prupe.6G287400	6.25169	1.23785e-05	1411	protein LURP-one-related 15	#N/A	#N/A
Prupe.6G044300	2.2594	1.24445e-05	3393	peroxidase 4	GO:0055114, GO:0016491, GO:0046872, GO:0005576, GO:0020037, GO:0004601, GO:0098869, GO:0006979, GO:0042744	oxidation-reduction process, oxidoreductase activity, metal ion binding, extracellular region, heme binding, peroxidase activity, cellular oxidant detoxification, response to oxidative stress, hydrogen peroxide catabolic process
Prupe.2G169500	-6.45596	1.25868e-05	2795	putative leucine-rich repeat receptor-like serine/threonine-protein kinase At2g24130	GO:0016020, GO:0016021, GO:0005515	membrane, integral component of membrane, protein binding
Prupe.4G109500	-5.20964	1.26762e-05	7915	uncharacterized LOC109949030	GO:0055085, GO:0016020, GO:0016021, GO:0005216, GO:0006811, GO:0034220	transmembrane transport, membrane, integral component of membrane, ion channel activity, ion transport, ion transmembrane transport
Prupe.1G498400	4.53387	1.27622e-05	480	---NA---	#N/A	#N/A
Prupe.8G001900	-5.16486	1.28226e-05	4337	protein NRT1/ PTR FAMILY 4.4	GO:0055085, GO:0016020, GO:0016021, GO:0022857	transmembrane transport, membrane, integral component of membrane, transmembrane transporter activity
Prupe.1G482900	5.67752	1.28913e-05	3381	ACT domain-containing protein ACR2	#N/A	#N/A
Prupe.5G164100	-3.73604	1.29432e-05	2217	cytochrome P450 71A1	GO:0055114, GO:0016491, GO:0016020, GO:0016021, GO:0046872, GO:0004497, GO:0005506, GO:0016705, GO:0020037	oxidation-reduction process, oxidoreductase activity, membrane, integral component of membrane, metal ion binding, monooxygenase activity, iron ion binding, oxidoreductase activity, acting on paired donors, with incorporation or reduction of molecular oxygen, heme binding
Prupe.4G263400	7.15673	1.30644e-05	2028	alpha carbonic anhydrase 7	GO:0046872, GO:0016829, GO:0008270, GO:0004089, GO:0009570, GO:0006730, GO:0016836	metal ion binding, lyase activity, zinc ion binding, carbonate dehydratase activity, chloroplast stroma, one-carbon metabolic process, hydro-lyase activity
Prupe.2G191200	-2.25515	1.31203e-05	3276	protein KINESIN LIGHT CHAIN-RELATED 1	GO:0005515	protein binding
Prupe.2G167700	5.1461	1.31294e-05	3824	probable LRR receptor-like serine/threonine-protein kinase At4g36180	GO:0016020, GO:0016021, GO:0005515	membrane, integral component of membrane, protein binding
Prupe.2G068000	-2.34795	1.32069e-05	1233	TMV resistance protein N	#N/A	#N/A
Prupe.1G504400	-2.05867	1.32593e-05	2366	profilin	GO:0005737, GO:0003779, GO:0005856, GO:0005938, GO:0003785, GO:0042989	cytoplasm, actin binding, cytoskeleton, cell cortex, actin monomer binding, sequestering of actin monomers
Prupe.3G177100	2.48998	1.32868e-05	2404	---NA---	GO:0016787, GO:0004190, GO:0008233, GO:0006508	hydrolase activity, aspartic-type endopeptidase activity, peptidase activity, proteolysis
Prupe.4G221700	4.96092	1.3487e-05	2531	endoglucanase 11	GO:0005975, GO:0016787, GO:0016798, GO:0008152, GO:0004553, GO:0008810, GO:0000272, GO:0030245	carbohydrate metabolic process, hydrolase activity, hydrolase activity, acting on glycosyl bonds, metabolic process, hydrolase activity, hydrolyzing O-glycosyl compounds, cellulase activity, polysaccharide catabolic process, cellulose catabolic process
Prupe.3G142800	-2.63899	1.36272e-05	986	---NA---	GO:0016020, GO:0016021	membrane, integral component of membrane
Prupe.6G039400	-2.27669	1.3672e-05	4664	probable inactive receptor kinase At5g58300	GO:0005524, GO:0016020, GO:0016021, GO:0004672, GO:0006468, GO:0005886	ATP binding, membrane, integral component of membrane, protein kinase activity, protein phosphorylation, plasma membrane
Prupe.8G186300	3.24247	1.36935e-05	821	probably inactive leucine-rich repeat receptor-like protein kinase At5g48380	GO:0016020, GO:0016021	membrane, integral component of membrane
Prupe.6G170400	-5.24265	1.37412e-05	1109	uncharacterized LOC18775424	#N/A	#N/A
Prupe.3G162800	2.3846	1.37427e-05	1889	protein C2-DOMAIN ABA-RELATED 4	#N/A	#N/A
Prupe.6G245300	-4.59904	1.38088e-05	3379	uncharacterized LOC109949830	GO:0031011	Ino80 complex
Prupe.1G433500	-6.76473	1.40038e-05	1820	heat stress transcription factor B-4	GO:0005634, GO:0003677, GO:0006355, GO:0003700, GO:0043565, GO:0006357, GO:0000978	nucleus, DNA binding, regulation of transcription, DNA-templated, DNA-binding transcription factor activity, sequence-specific DNA binding, regulation of transcription by RNA polymerase II, RNA polymerase II cis-regulatory region sequence-specific DNA binding
Prupe.3G284600	5.2587	1.43385e-05	2134	2-methylene-furan-3-one reductase	GO:0055114, GO:0016491, GO:0008270	oxidation-reduction process, oxidoreductase activity, zinc ion binding
Prupe.7G095900	-3.04397	1.4421e-05	2522	UPF0481 protein At3g47200	GO:0016020, GO:0016021	membrane, integral component of membrane
Prupe.6G126100	7.50378	1.46194e-05	11785	probable LRR receptor-like serine/threonine-protein kinase At1g53430	GO:0005524, GO:0000166, GO:0016301, GO:0016310, GO:0016020, GO:0016021, GO:0016740, GO:0004672, GO:0006468, GO:0004674, GO:0005886, GO:0046777, GO:0005515, GO:0106310, GO:0106311	ATP binding, nucleotide binding, kinase activity, phosphorylation, membrane, integral component of membrane, transferase activity, protein kinase activity, protein phosphorylation, protein serine/threonine kinase activity, plasma membrane, protein autophosphorylation, protein binding, ,
Prupe.6G282700	2.37896	1.46384e-05	2027	probable L-type lectin-domain containing receptor kinase VI.1	GO:0005886, GO:0005524, GO:0000166, GO:0016301, GO:0016310, GO:0016020, GO:0016021, GO:0016740, GO:0030246, GO:0004672, GO:0006468, GO:0007178, GO:0004675, GO:0002229, GO:0042742	plasma membrane, ATP binding, nucleotide binding, kinase activity, phosphorylation, membrane, integral component of membrane, transferase activity, carbohydrate binding, protein kinase activity, protein phosphorylation, transmembrane receptor protein serine/threonine kinase signaling pathway, transmembrane receptor protein serine/threonine kinase activity, defense response to oomycetes, defense r…
Prupe.5G116200	3.33409	1.4942e-05	1919	hydroquinone glucosyltransferase	GO:0016740, GO:0016757, GO:0016758, GO:0008194	transferase activity, transferase activity, transferring glycosyl groups, transferase activity, transferring hexosyl groups, UDP-glycosyltransferase activity
Prupe.I000800	2.75184	1.49587e-05	945	---NA---	GO:0008152, GO:0016787	metabolic process, hydrolase activity
Prupe.7G163600	-2.3077	1.50546e-05	5965	protein SHORT INTERNODES	GO:0005634, GO:0009734, GO:0007275, GO:0009851, GO:0003677, GO:0045893	nucleus, auxin-activated signaling pathway, multicellular organism development, auxin biosynthetic process, DNA binding, positive regulation of transcription, DNA-templated
Prupe.3G085000	-3.05558	1.51432e-05	3769	putative disease resistance protein RGA3	GO:0043531, GO:0006952, GO:0005515	ADP binding, defense response, protein binding
Prupe.5G133500	2.29279	1.5382e-05	4526	subtilisin-like protease SBT3.4	GO:0016787, GO:0008233, GO:0006508, GO:0004252, GO:0008236	hydrolase activity, peptidase activity, proteolysis, serine-type endopeptidase activity, serine-type peptidase activity
Prupe.5G233100	-2.25252	1.54121e-05	4029	probable auxin efflux carrier component 1c	GO:0055085, GO:0016020, GO:0016021, GO:0009734, GO:0005783, GO:0005886, GO:0009926, GO:0010329, GO:0010252, GO:0010315	transmembrane transport, membrane, integral component of membrane, auxin-activated signaling pathway, endoplasmic reticulum, plasma membrane, auxin polar transport, auxin efflux transmembrane transporter activity, auxin homeostasis, auxin efflux
Prupe.6G286600	2.97028	1.56643e-05	1657	short-chain dehydrogenase reductase 2a	GO:0055114	oxidation-reduction process
Prupe.6G033100	-3.58629	1.56698e-05	2322	uncharacterized LOC18772538	GO:0016020, GO:0016021	membrane, integral component of membrane
Prupe.1G028500	-8.54235	1.58295e-05	3206	protein SIEVE ELEMENT OCCLUSION B	GO:0010088	phloem development
Prupe.4G153400	-4.43956	1.60673e-05	1473	glucan endo-1,3-beta-glucosidase	#N/A	#N/A
Prupe.3G228000	-3.24945	1.60973e-05	2392	putative cyclin-D6-1	GO:0007049, GO:0051301, GO:0005634, GO:0051726, GO:0005737, GO:0000079, GO:0000307, GO:0016538, GO:0044772	cell cycle, cell division, nucleus, regulation of cell cycle, cytoplasm, regulation of cyclin-dependent protein serine/threonine kinase activity, cyclin-dependent protein kinase holoenzyme complex, cyclin-dependent protein serine/threonine kinase regulator activity, mitotic cell cycle phase transition
Prupe.6G141500	5.75657	1.61988e-05	887	uncharacterized LOC18774466	GO:0003676, GO:0090502, GO:0004523	nucleic acid binding, RNA phosphodiester bond hydrolysis, endonucleolytic, RNA-DNA hybrid ribonuclease activity
Prupe.5G100700	-2.16644	1.62743e-05	5003	transcription factor EGL1	GO:0005634, GO:0046983	nucleus, protein dimerization activity
Prupe.6G263300	5.12573	1.63218e-05	3064	---NA---	GO:0005524, GO:0000166, GO:0016301, GO:0016310, GO:0016020, GO:0016021, GO:0016740, GO:0004672, GO:0006468, GO:0004674, GO:0106310, GO:0106311	ATP binding, nucleotide binding, kinase activity, phosphorylation, membrane, integral component of membrane, transferase activity, protein kinase activity, protein phosphorylation, protein serine/threonine kinase activity, ,
Prupe.1G181500	-6.05407	1.63664e-05	3198	---NA---	#N/A	#N/A
Prupe.5G162100	-2.74192	1.64277e-05	3438	protein SIEVE ELEMENT OCCLUSION B	GO:0010088	phloem development
Prupe.1G033700	5.0946	1.65066e-05	4351	cellulose synthase-like protein E1	GO:0016020, GO:0016021, GO:0016740, GO:0016757, GO:0016760, GO:0030244, GO:0071555, GO:0097502, GO:0005886, GO:0005802, GO:0009833, GO:0051753	membrane, integral component of membrane, transferase activity, transferase activity, transferring glycosyl groups, cellulose synthase (UDP-forming) activity, cellulose biosynthetic process, cell wall organization, mannosylation, plasma membrane, trans-Golgi network, plant-type primary cell wall biogenesis, mannan synthase activity
Prupe.5G109000	2.64334	1.67288e-05	533	---NA---	GO:0016020, GO:0016021	membrane, integral component of membrane
Prupe.5G203900	-2.09092	1.67322e-05	10006	PLASMODESMATA CALLOSE-BINDING PROTEIN 3	#N/A	#N/A
Prupe.5G092500	2.59759	1.68151e-05	5360	raf homolog serine/threonine-protein kinase phl	GO:0005524, GO:0004672, GO:0006468, GO:0006355, GO:0018298, GO:0009881, GO:0050896, GO:0005829, GO:0005737, GO:0007165	ATP binding, protein kinase activity, protein phosphorylation, regulation of transcription, DNA-templated, protein-chromophore linkage, photoreceptor activity, response to stimulus, cytosol, cytoplasm, signal transduction
Prupe.8G102300	-2.64921	1.73215e-05	4023	deSI-like protein At4g17486	GO:0016787, GO:0016579, GO:0101005, GO:0070646, GO:0018215	hydrolase activity, protein deubiquitination, ubiquitinyl hydrolase activity, protein modification by small protein removal, protein phosphopantetheinylation
Prupe.3G058200	-6.12866	1.73706e-05	1133	mitogen-activated protein kinase kinase kinase A	GO:0005524, GO:0000166, GO:0016301, GO:0016310, GO:0016740, GO:0004672, GO:0006468, GO:0004674	ATP binding, nucleotide binding, kinase activity, phosphorylation, transferase activity, protein kinase activity, protein phosphorylation, protein serine/threonine kinase activity
Prupe.4G260000	8.42167	1.75983e-05	1848	uncharacterized LOC18779467	GO:0016020, GO:0016021, GO:0008375	membrane, integral component of membrane, acetylglucosaminyltransferase activity
Prupe.6G296400	-2.26687	1.82984e-05	3827	uncharacterized serine-rich protein C215.13	GO:0043622, GO:0055028	cortical microtubule organization, cortical microtubule
Prupe.6G009700	-6.87459	1.83245e-05	3253	receptor-like protein 2	GO:0016020, GO:0016021, GO:0005515	membrane, integral component of membrane, protein binding
Prupe.4G099500	7.09772	1.83626e-05	1607	berberine bridge enzyme-like 8	GO:0016491, GO:0055114, GO:0050660, GO:0071949	oxidoreductase activity, oxidation-reduction process, flavin adenine dinucleotide binding, FAD binding
Prupe.6G272900	-2.78689	1.83939e-05	2572	glycerol-3-phosphate 2-O-acyltransferase 6	GO:0016020, GO:0016021, GO:0016746, GO:0016311, GO:0016791, GO:0090447, GO:0010143	membrane, integral component of membrane, transferase activity, transferring acyl groups, dephosphorylation, phosphatase activity, glycerol-3-phosphate 2-O-acyltransferase activity, cutin biosynthetic process
Prupe.8G151700	-4.50844	1.85705e-05	3270	uncharacterized LOC18767080	GO:0016020, GO:0016021	membrane, integral component of membrane
Prupe.1G235700	4.50689	1.86551e-05	445	---NA---	#N/A	#N/A
Prupe.1G154000	-2.58102	1.87229e-05	1839	uncharacterized GPI-anchored protein At3g06035	#N/A	#N/A
Prupe.2G097200	-3.32216	1.88644e-05	2447	transcription factor bHLH10	GO:0005634, GO:0046983	nucleus, protein dimerization activity
Prupe.1G086500	-2.63785	1.89555e-05	3164	AAA-ATPase At5g57480	GO:0005524, GO:0016887	ATP binding, ATPase activity
Prupe.7G112300	-4.7267	1.899e-05	679	germin-like protein subfamily 3 member 2	GO:0030145, GO:0046872, GO:0005576, GO:0005618, GO:0048046, GO:0045735	manganese ion binding, metal ion binding, extracellular region, cell wall, apoplast, nutrient reservoir activity
Prupe.2G257600	-4.92158	1.91784e-05	3201	probably inactive leucine-rich repeat receptor-like protein kinase IMK2	GO:0005524, GO:0016020, GO:0016021, GO:0004672, GO:0006468, GO:0005515	ATP binding, membrane, integral component of membrane, protein kinase activity, protein phosphorylation, protein binding
Prupe.1G441900	-7.0341	1.92179e-05	374	uncharacterized LOC18790780	GO:0016020, GO:0016021	membrane, integral component of membrane
Prupe.4G094300	3.91396	1.9471e-05	1129	wall-associated receptor kinase 3	GO:0005524, GO:0004672, GO:0006468, GO:0005886, GO:0004674, GO:0007166	ATP binding, protein kinase activity, protein phosphorylation, plasma membrane, protein serine/threonine kinase activity, cell surface receptor signaling pathway
Prupe.1G297000	3.10395	1.94833e-05	764	---NA---	#N/A	#N/A
Prupe.7G158400	-2.4415	1.96895e-05	6804	jasmonate O-methyltransferase	GO:0008168, GO:0016740, GO:0032259, GO:0008757	methyltransferase activity, transferase activity, methylation, S-adenosylmethionine-dependent methyltransferase activity
Prupe.3G015300	3.22514	1.97278e-05	4578	homeobox-leucine zipper protein ROC8	GO:0005634, GO:0003677, GO:0006355, GO:0008289, GO:0000981, GO:0043565, GO:0006357	nucleus, DNA binding, regulation of transcription, DNA-templated, lipid binding, DNA-binding transcription factor activity, RNA polymerase II-specific, sequence-specific DNA binding, regulation of transcription by RNA polymerase II
Prupe.1G449100	-3.08902	1.98002e-05	4085	carotenoid 9,10(9',10')-cleavage dioxygenase 1	GO:0055114, GO:0046872, GO:0016702, GO:0051213, GO:0009570, GO:0010436, GO:0016121	oxidation-reduction process, metal ion binding, oxidoreductase activity, acting on single donors with incorporation of molecular oxygen, incorporation of two atoms of oxygen, dioxygenase activity, chloroplast stroma, carotenoid dioxygenase activity, carotene catabolic process
Prupe.6G349200	8.87791	2.0032e-05	1508	transcription factor MYB14	GO:0005634, GO:0016020, GO:0016021, GO:0003677	nucleus, membrane, integral component of membrane, DNA binding
Prupe.2G234400	-6.11257	2.01088e-05	4323	---NA---	GO:0000166, GO:0005524, GO:0005737, GO:0051082, GO:0016887, GO:0031072, GO:0044183, GO:0051787, GO:0034620, GO:0042026, GO:0051085	nucleotide binding, ATP binding, cytoplasm, unfolded protein binding, ATPase activity, heat shock protein binding, protein folding chaperone, misfolded protein binding, cellular response to unfolded protein, protein refolding, chaperone cofactor-dependent protein refolding
Prupe.6G321400	-2.60036	2.01988e-05	2241	heavy metal-associated isoprenylated plant protein 36	GO:0046872, GO:0030001	metal ion binding, metal ion transport
Prupe.6G285100	-4.21461	2.02105e-05	6340	influenza virus NS1A-binding protein homolog	GO:0005515	protein binding
Prupe.1G345300	-2.18383	2.02398e-05	2501	delta(24)-sterol reductase	GO:0016491, GO:0055114, GO:0016020, GO:0016021, GO:0050660, GO:0071949, GO:0005737, GO:0016628, GO:0008202, GO:0050614	oxidoreductase activity, oxidation-reduction process, membrane, integral component of membrane, flavin adenine dinucleotide binding, FAD binding, cytoplasm, oxidoreductase activity, acting on the CH-CH group of donors, NAD or NADP as acceptor, steroid metabolic process, delta24-sterol reductase activity
Prupe.4G147300	3.80075	2.02584e-05	1399	---NA---	GO:0006749, GO:0005737, GO:0004364, GO:0005515	glutathione metabolic process, cytoplasm, glutathione transferase activity, protein binding
Prupe.3G262700	-6.13013	2.04394e-05	2920	---NA---	GO:0016020, GO:0016021, GO:0005730, GO:0003950, GO:1990404, GO:0006302, GO:0070212	membrane, integral component of membrane, nucleolus, NAD+ ADP-ribosyltransferase activity, protein ADP-ribosylase activity, double-strand break repair, protein poly-ADP-ribosylation
Prupe.2G055700	-2.18945	2.06876e-05	4181	TMV resistance protein N	GO:0007165, GO:0016787, GO:0043531, GO:0006952, GO:0006629, GO:0008081, GO:0005515, GO:0050135, GO:0061809	signal transduction, hydrolase activity, ADP binding, defense response, lipid metabolic process, phosphoric diester hydrolase activity, protein binding, NAD(P)+ nucleosidase activity, NAD+ nucleotidase, cyclic ADP-ribose generating
Prupe.2G168800	-3.09697	2.07366e-05	4083	---NA---	GO:0005515	protein binding
Prupe.2G153500	-6.28055	2.09329e-05	5251	SPX and EXS domain-containing protein 1	GO:0016020, GO:0016021, GO:0005794, GO:0005737	membrane, integral component of membrane, Golgi apparatus, cytoplasm
Prupe.2G206600	6.12071	2.10675e-05	2331	---NA---	GO:0016020, GO:0016021, GO:0002239, GO:0009506	membrane, integral component of membrane, response to oomycetes, plasmodesma
Prupe.1G475600	-6.59111	2.15211e-05	573	---NA---	GO:0016020, GO:0016021	membrane, integral component of membrane
Prupe.6G104500	-4.36124	2.15798e-05	758	---NA---	GO:0003824, GO:0045548, GO:0009698, GO:0009800, GO:0016841	catalytic activity, phenylalanine ammonia-lyase activity, phenylpropanoid metabolic process, cinnamic acid biosynthetic process, ammonia-lyase activity
Prupe.7G015100	-7.73145	2.18095e-05	3147	dynamin-related protein 4C	GO:0003924, GO:0005525, GO:0016020, GO:0005737, GO:0005886, GO:0008017, GO:0048285, GO:0015630, GO:0031410, GO:0061025, GO:0000266, GO:0003374, GO:0031623, GO:0050803, GO:0031966	GTPase activity, GTP binding, membrane, cytoplasm, plasma membrane, microtubule binding, organelle fission, microtubule cytoskeleton, cytoplasmic vesicle, membrane fusion, mitochondrial fission, dynamin family protein polymerization involved in mitochondrial fission, receptor internalization, regulation of synapse structure or activity, mitochondrial membrane
Prupe.6G200800	6.0332	2.19584e-05	4096	---NA---	#N/A	#N/A
Prupe.8G235600	-4.01076	2.20423e-05	1745	chlorophyllase-1	GO:0047746, GO:0015996, GO:0042742, GO:0050832, GO:0005773, GO:0102293	chlorophyllase activity, chlorophyll catabolic process, defense response to bacterium, defense response to fungus, vacuole, pheophytinase b activity
Prupe.8G252700	-4.66109	2.21945e-05	768	classical arabinogalactan protein 26	#N/A	#N/A
Prupe.1G433900	6.09733	2.29965e-05	1511	---NA---	GO:0016020, GO:0016021	membrane, integral component of membrane
Prupe.5G078100	3.63133	2.3268e-05	3122	flavonoid 3'-monooxygenase	GO:0055114, GO:0016491, GO:0016020, GO:0016021, GO:0046872, GO:0004497, GO:0005506, GO:0016705, GO:0020037	oxidation-reduction process, oxidoreductase activity, membrane, integral component of membrane, metal ion binding, monooxygenase activity, iron ion binding, oxidoreductase activity, acting on paired donors, with incorporation or reduction of molecular oxygen, heme binding
Prupe.8G132400	-3.06728	2.33075e-05	2458	---NA---	GO:0046983, GO:0006351, GO:0003899, GO:0005665	protein dimerization activity, transcription, DNA-templated, DNA-directed 5'-3' RNA polymerase activity, RNA polymerase II, core complex
Prupe.1G497700	9.42562	2.33185e-05	3167	esterase	GO:0016788	hydrolase activity, acting on ester bonds
Prupe.1G048000	-2.98708	2.33245e-05	4525	disease resistance protein RPP8	GO:0043531, GO:0006952	ADP binding, defense response
Prupe.8G108400	-2.21046	2.36965e-05	7486	long chain acyl-CoA synthetase 2	GO:0001676, GO:0003824, GO:0016020, GO:0005783, GO:0010143, GO:0004467, GO:0010025	long-chain fatty acid metabolic process, catalytic activity, membrane, endoplasmic reticulum, cutin biosynthetic process, long-chain fatty acid-CoA ligase activity, wax biosynthetic process
Prupe.1G476600	-3.97681	2.3736e-05	4365	---NA---	GO:0016020, GO:0016021	membrane, integral component of membrane
Prupe.8G015500	6.36256	2.45314e-05	967	uncharacterized LOC109950711	#N/A	#N/A
Prupe.4G011900	4.03336	2.46184e-05	2493	uncharacterized LOC18780569	#N/A	#N/A
Prupe.3G168700	-11.3941	2.47805e-05	3301	protein trichome birefringence-like 43	GO:0016413, GO:0005794	O-acetyltransferase activity, Golgi apparatus
Prupe.2G228800	-2.21277	2.51924e-05	1883	uncharacterized LOC18785824	#N/A	#N/A
Prupe.7G171100	-2.70894	2.53513e-05	2216	---NA---	GO:0055114, GO:0016491, GO:0046872, GO:0020037, GO:0004601, GO:0098869, GO:0006979, GO:0000302, GO:0009507, GO:0034599, GO:0042744, GO:0016688	oxidation-reduction process, oxidoreductase activity, metal ion binding, heme binding, peroxidase activity, cellular oxidant detoxification, response to oxidative stress, response to reactive oxygen species, chloroplast, cellular response to oxidative stress, hydrogen peroxide catabolic process, L-ascorbate peroxidase activity
Prupe.7G124400	3.03867	2.56993e-05	1460	UDP-glycosyltransferase 73C1	GO:0016740, GO:0016757, GO:0016758, GO:0008194	transferase activity, transferase activity, transferring glycosyl groups, transferase activity, transferring hexosyl groups, UDP-glycosyltransferase activity
Prupe.1G343600	-2.56809	2.57006e-05	5134	inactive leucine-rich repeat receptor-like serine/threonine-protein kinase At1g60630	GO:0005524, GO:0016020, GO:0016021, GO:0004672, GO:0006468, GO:0005515	ATP binding, membrane, integral component of membrane, protein kinase activity, protein phosphorylation, protein binding
Prupe.6G254000	-4.44492	2.59014e-05	753	cyclin-dependent protein kinase inhibitor SMR10	GO:0016301, GO:0016310, GO:0032875, GO:0005634, GO:0045839	kinase activity, phosphorylation, regulation of DNA endoreduplication, nucleus, negative regulation of mitotic nuclear division
Prupe.1G296900	2.18071	2.59684e-05	2036	---NA---	GO:0055114, GO:0016491, GO:0016020, GO:0016021, GO:0046872, GO:0004497, GO:0005506, GO:0016705, GO:0020037	oxidation-reduction process, oxidoreductase activity, membrane, integral component of membrane, metal ion binding, monooxygenase activity, iron ion binding, oxidoreductase activity, acting on paired donors, with incorporation or reduction of molecular oxygen, heme binding
Prupe.8G032800	-6.81591	2.59684e-05	975	citrate-binding protein	#N/A	#N/A
Prupe.8G120400	6.0858	2.61276e-05	3390	TMV resistance protein N	GO:0007165, GO:0016787, GO:0016020, GO:0016021, GO:0043531, GO:0005515, GO:0050135, GO:0061809	signal transduction, hydrolase activity, membrane, integral component of membrane, ADP binding, protein binding, NAD(P)+ nucleosidase activity, NAD+ nucleotidase, cyclic ADP-ribose generating
Prupe.2G128600	3.45288	2.61417e-05	3151	receptor-like protein 12	GO:0005515	protein binding
Prupe.3G071100	-6.20426	2.63182e-05	920	polyol transporter 5	GO:0055085, GO:0016020, GO:0016021, GO:0022857	transmembrane transport, membrane, integral component of membrane, transmembrane transporter activity
Prupe.1G468100	-3.4242	2.63528e-05	2537	probable 2-oxoglutarate-dependent dioxygenase AOP1	GO:0055114, GO:0016491, GO:0046872, GO:0051213	oxidation-reduction process, oxidoreductase activity, metal ion binding, dioxygenase activity
Prupe.4G167400	-2.2038	2.67458e-05	5134	TPR repeat-containing thioredoxin TTL1	GO:0045454, GO:0005623, GO:0005515, GO:0005737	cell redox homeostasis, obsolete cell, protein binding, cytoplasm
Prupe.4G146100	-3.20452	2.69467e-05	1459	probable glutathione S-transferase parC	GO:0006749, GO:0005737, GO:0004364, GO:0005515	glutathione metabolic process, cytoplasm, glutathione transferase activity, protein binding
Prupe.4G058900	-6.3987	2.71619e-05	2624	GDSL esterase/lipase At1g28590	GO:0016788	hydrolase activity, acting on ester bonds
Prupe.8G042400	4.39319	2.76495e-05	2615	---NA---	GO:0005515	protein binding
Prupe.6G080600	-3.00719	2.76955e-05	998	osmotin-like protein	GO:0006952, GO:0005576	defense response, extracellular region
Prupe.6G007200	-8.43252	2.7769e-05	2121	licodione synthase	GO:0055114, GO:0016491, GO:0046872, GO:0004497, GO:0005506, GO:0016705, GO:0020037, GO:0016020, GO:0016709	oxidation-reduction process, oxidoreductase activity, metal ion binding, monooxygenase activity, iron ion binding, oxidoreductase activity, acting on paired donors, with incorporation or reduction of molecular oxygen, heme binding, membrane, oxidoreductase activity, acting on paired donors, with incorporation or reduction of molecular oxygen, NAD(P)H as one donor, and incorporation of one atom of…
Prupe.3G218700	3.06811	2.80381e-05	1486	uncharacterized LOC18784217	GO:0010089, GO:0005634, GO:0005829	xylem development, nucleus, cytosol
Prupe.6G158400	4.03032	2.8241e-05	4061	G-type lectin S-receptor-like serine/threonine-protein kinase At1g11330	GO:0005524, GO:0016020, GO:0016021, GO:0004672, GO:0006468, GO:0005886, GO:0004674	ATP binding, membrane, integral component of membrane, protein kinase activity, protein phosphorylation, plasma membrane, protein serine/threonine kinase activity
Prupe.4G145400	2.97438	2.83775e-05	1627	---NA---	GO:0016020, GO:0016021	membrane, integral component of membrane
Prupe.6G177800	6.34883	2.88407e-05	871	---NA---	#N/A	#N/A
Prupe.7G185900	-2.4829	2.88407e-05	3314	histone-lysine N-methyltransferase, H3 lysine-9 specific SUVH1	GO:0005634, GO:0016740, GO:0008270, GO:0008168, GO:0032259, GO:0018024, GO:0034968, GO:0016571, GO:0005694, GO:0005515	nucleus, transferase activity, zinc ion binding, methyltransferase activity, methylation, histone-lysine N-methyltransferase activity, histone lysine methylation, histone methylation, chromosome, protein binding
Prupe.1G404000	-3.46771	2.8886e-05	1869	---NA---	#N/A	#N/A
Prupe.1G503600	-6.10648	2.91234e-05	2396	uncharacterized LOC18790788	GO:0003676	nucleic acid binding
Prupe.8G004600	-3.1629	2.93368e-05	2358	probable glycosyltransferase At5g03795	GO:0005794, GO:0016020, GO:0016021, GO:0016757, GO:0006486, GO:0000139	Golgi apparatus, membrane, integral component of membrane, transferase activity, transferring glycosyl groups, protein glycosylation, Golgi membrane
Prupe.1G407100	-6.96219	2.936e-05	954	17.6 kDa class II heat shock protein	GO:0009651, GO:0043621, GO:0051082, GO:0006457, GO:0009408, GO:0051259, GO:0042542	response to salt stress, protein self-association, unfolded protein binding, protein folding, response to heat, protein complex oligomerization, response to hydrogen peroxide
Prupe.4G168600	7.95183	2.93947e-05	1243	---NA---	GO:0016020, GO:0016021	membrane, integral component of membrane
Prupe.5G025100	2.25554	2.95331e-05	2841	disease resistance protein RPM1	GO:0043531, GO:0006952	ADP binding, defense response
Prupe.3G021100	-5.83259	3.03448e-05	941	uncharacterized LOC18782589	#N/A	#N/A
Prupe.6G024900	-5.86538	3.06223e-05	4245	---NA---	GO:0016020, GO:0016021, GO:0016740, GO:0016757, GO:0016760, GO:0030244, GO:0097502, GO:0071555, GO:0005886, GO:0005802, GO:0009833, GO:0051753	membrane, integral component of membrane, transferase activity, transferase activity, transferring glycosyl groups, cellulose synthase (UDP-forming) activity, cellulose biosynthetic process, mannosylation, cell wall organization, plasma membrane, trans-Golgi network, plant-type primary cell wall biogenesis, mannan synthase activity
Prupe.2G165900	-6.29761	3.06564e-05	744	putative ripening-related protein 1	#N/A	#N/A
Prupe.1G385900	3.32549	3.09801e-05	2443	uncharacterized LOC18790808	GO:0016020, GO:0016021	membrane, integral component of membrane
Prupe.6G216600	3.00683	3.16112e-05	1281	---NA---	GO:0003824, GO:0042819, GO:0042823	catalytic activity, vitamin B6 biosynthetic process, pyridoxal phosphate biosynthetic process
Prupe.7G261000	4.44195	3.16729e-05	4602	AP2/ERF and B3 domain-containing transcription factor At1g50680	GO:0005634, GO:0003677, GO:0006355, GO:0003700, GO:0006351	nucleus, DNA binding, regulation of transcription, DNA-templated, DNA-binding transcription factor activity, transcription, DNA-templated
Prupe.7G141000	5.83101	3.18124e-05	2317	salicylic acid-binding protein 2	GO:0080030, GO:0080031, GO:0080032, GO:0009694, GO:0009696	methyl indole-3-acetate esterase activity, methyl salicylate esterase activity, methyl jasmonate esterase activity, jasmonic acid metabolic process, salicylic acid metabolic process
Prupe.5G185500	-4.02143	3.20735e-05	4391	LRR receptor-like serine/threonine-protein kinase FEI 1	GO:0005524, GO:0000166, GO:0016301, GO:0016310, GO:0016020, GO:0016021, GO:0016740, GO:0004672, GO:0006468, GO:0004674, GO:0030244, GO:0005515	ATP binding, nucleotide binding, kinase activity, phosphorylation, membrane, integral component of membrane, transferase activity, protein kinase activity, protein phosphorylation, protein serine/threonine kinase activity, cellulose biosynthetic process, protein binding
Prupe.2G097800	-3.69688	3.21677e-05	1487	uncharacterized LOC109947365	#N/A	#N/A
Prupe.1G491300	-2.44877	3.22499e-05	2598	amino acid permease 3	GO:0016020, GO:0016021, GO:0009734, GO:0055085, GO:0005886, GO:0015293, GO:0006865	membrane, integral component of membrane, auxin-activated signaling pathway, transmembrane transport, plasma membrane, symporter activity, amino acid transport
Prupe.2G135500	-5.7267	3.23414e-05	1520	---NA---	GO:0005515	protein binding
Prupe.5G027700	-4.01126	3.27301e-05	5015	cellulose synthase-like protein D3	GO:0016020, GO:0016021, GO:0016740, GO:0016757, GO:0016760, GO:0030244, GO:0097502, GO:0071555, GO:0005886, GO:0005802, GO:0009833, GO:0051753	membrane, integral component of membrane, transferase activity, transferase activity, transferring glycosyl groups, cellulose synthase (UDP-forming) activity, cellulose biosynthetic process, mannosylation, cell wall organization, plasma membrane, trans-Golgi network, plant-type primary cell wall biogenesis, mannan synthase activity
Prupe.2G194400	2.34784	3.28539e-05	1381	homeobox-leucine zipper protein ATHB-12	GO:0005634, GO:0003677, GO:0006355, GO:0043565, GO:0000981, GO:0003700, GO:0045893, GO:0006357	nucleus, DNA binding, regulation of transcription, DNA-templated, sequence-specific DNA binding, DNA-binding transcription factor activity, RNA polymerase II-specific, DNA-binding transcription factor activity, positive regulation of transcription, DNA-templated, regulation of transcription by RNA polymerase II
Prupe.8G141500	-4.01314	3.31883e-05	2448	---NA---	GO:0008270	zinc ion binding
Prupe.6G212700	-2.30826	3.31951e-05	2667	tubulin alpha chain	GO:0000166, GO:0003924, GO:0005525, GO:0005200, GO:0007017, GO:0005874, GO:0005737, GO:0000278, GO:0000226	nucleotide binding, GTPase activity, GTP binding, structural constituent of cytoskeleton, microtubule-based process, microtubule, cytoplasm, mitotic cell cycle, microtubule cytoskeleton organization
Prupe.3G091700	2.77584	3.3318e-05	1227	VQ motif-containing protein 11	GO:0005634	nucleus
Prupe.3G260100	-2.16656	3.33399e-05	1595	UDP-glycosyltransferase 708C1	GO:0016740, GO:0016757, GO:0016758, GO:0008194, GO:0043231	transferase activity, transferase activity, transferring glycosyl groups, transferase activity, transferring hexosyl groups, UDP-glycosyltransferase activity, intracellular membrane-bounded organelle
Prupe.2G011400	-5.24424	3.35e-05	5212	---NA---	GO:0043531, GO:0006952, GO:0005515	ADP binding, defense response, protein binding
Prupe.1G301700	-2.69971	3.37107e-05	1593	lysine-rich arabinogalactan protein 19	GO:0016020, GO:0016021	membrane, integral component of membrane
Prupe.2G138500	-7.28284	3.37204e-05	1579	uncharacterized LOC18786790	#N/A	#N/A
Prupe.7G075500	-2.72007	3.37512e-05	1086	uncharacterized LOC18769932	#N/A	#N/A
Prupe.8G009000	2.82124	3.42108e-05	3614	disease resistance protein RPM1	GO:0043531, GO:0006952	ADP binding, defense response
Prupe.6G205400	7.36549	3.44133e-05	2044	probable mannitol dehydrogenase	GO:0055114, GO:0016491, GO:0046872, GO:0008270, GO:0016616, GO:0045551, GO:0009809	oxidation-reduction process, oxidoreductase activity, metal ion binding, zinc ion binding, oxidoreductase activity, acting on the CH-OH group of donors, NAD or NADP as acceptor, cinnamyl-alcohol dehydrogenase activity, lignin biosynthetic process
Prupe.1G496200	2.76582	3.45371e-05	1097	uncharacterized LOC18791364	#N/A	#N/A
Prupe.8G017400	-4.45422	3.48866e-05	2167	bidirectional sugar transporter SWEET1	GO:0016020, GO:0016021, GO:0008643, GO:0051119, GO:0034219, GO:0005886	membrane, integral component of membrane, carbohydrate transport, sugar transmembrane transporter activity, carbohydrate transmembrane transport, plasma membrane
Prupe.7G200200	-10.9396	3.49393e-05	2571	---NA---	GO:0030145, GO:0046872, GO:0005576, GO:0005618, GO:0048046, GO:0009734, GO:0045735	manganese ion binding, metal ion binding, extracellular region, cell wall, apoplast, auxin-activated signaling pathway, nutrient reservoir activity
Prupe.5G112700	-3.00158	3.50207e-05	8795	ABC transporter C family member 10	GO:0055085, GO:0005524, GO:0000166, GO:0016020, GO:0016021, GO:0016887, GO:0042626, GO:0000325, GO:0005774	transmembrane transport, ATP binding, nucleotide binding, membrane, integral component of membrane, ATPase activity, ATPase-coupled transmembrane transporter activity, plant-type vacuole, vacuolar membrane
Prupe.3G155800	-7.24713	3.5044e-05	2333	clathrin light chain 1	GO:0016020, GO:0006886, GO:0005198, GO:0030659, GO:0031410, GO:0016192, GO:0005905, GO:0030130, GO:0030132, GO:0005886, GO:0072583, GO:0032050, GO:0030125, GO:0048268, GO:0005829	membrane, intracellular protein transport, structural molecule activity, cytoplasmic vesicle membrane, cytoplasmic vesicle, vesicle-mediated transport, clathrin-coated pit, clathrin coat of trans-Golgi network vesicle, clathrin coat of coated pit, plasma membrane, clathrin-dependent endocytosis, clathrin heavy chain binding, clathrin vesicle coat, clathrin coat assembly, cytosol
Prupe.4G252100	-5.20123	3.50903e-05	2592	3,5-dihydroxybiphenyl synthase	GO:0009058, GO:0016740, GO:0016746, GO:0016747, GO:0030639	biosynthetic process, transferase activity, transferase activity, transferring acyl groups, transferase activity, transferring acyl groups other than amino-acyl groups, polyketide biosynthetic process
Prupe.5G207900	-2.82757	3.51105e-05	2434	COBRA-like protein 4	GO:0010215, GO:0031225, GO:0052324, GO:0046658	cellulose microfibril organization, anchored component of membrane, plant-type cell wall cellulose biosynthetic process, anchored component of plasma membrane
Prupe.7G246300	2.13874	3.51105e-05	1166	---NA---	GO:0009055, GO:0022900, GO:0046658	electron transfer activity, electron transport chain, anchored component of plasma membrane
Prupe.4G147000	4.32581	3.59193e-05	1468	probable glutathione S-transferase parC	GO:0006749, GO:0005737, GO:0004364, GO:0005515	glutathione metabolic process, cytoplasm, glutathione transferase activity, protein binding
Prupe.6G147800	7.49054	3.60161e-05	1424	---NA---	#N/A	#N/A
Prupe.4G086500	2.08567	3.64026e-05	2088	phospholipase A1-Igamma1, chloroplastic	GO:0006629, GO:0016787, GO:0004620	lipid metabolic process, hydrolase activity, phospholipase activity
Prupe.8G265600	-2.68345	3.64174e-05	7070	kinesin-like protein KIN-14I	GO:0005524, GO:0000166, GO:0003774, GO:0003777, GO:0008017, GO:0007018, GO:0005515	ATP binding, nucleotide binding, motor activity, microtubule motor activity, microtubule binding, microtubule-based movement, protein binding
Prupe.8G012000	5.85909	3.68562e-05	3323	probable disease resistance protein At4g27220	GO:0043531, GO:0005515	ADP binding, protein binding
Prupe.3G140300	-3.00465	3.6958e-05	5088	---NA---	GO:0005634, GO:0005737, GO:0005856, GO:0005874, GO:0032147, GO:0060236, GO:0005819, GO:0090307, GO:0008017, GO:0005880, GO:0072686, GO:0030295, GO:0000278, GO:0051225, GO:0005654, GO:0009524, GO:0009941	nucleus, cytoplasm, cytoskeleton, microtubule, activation of protein kinase activity, regulation of mitotic spindle organization, spindle, mitotic spindle assembly, microtubule binding, nuclear microtubule, mitotic spindle, protein kinase activator activity, mitotic cell cycle, spindle assembly, nucleoplasm, phragmoplast, chloroplast envelope
Prupe.6G069800	-5.91033	3.69681e-05	7708	uncharacterized LOC18772679	GO:0016020, GO:0016021	membrane, integral component of membrane
Prupe.1G371500	-2.79109	3.71478e-05	2547	protein SHI RELATED SEQUENCE 5	GO:0005634, GO:0009734, GO:0007275, GO:0009851, GO:0003677, GO:0045893	nucleus, auxin-activated signaling pathway, multicellular organism development, auxin biosynthetic process, DNA binding, positive regulation of transcription, DNA-templated
Prupe.1G114800	2.2848	3.72344e-05	2878	probable WRKY transcription factor 48	GO:0005634, GO:0003677, GO:0006355, GO:0003700, GO:0043565	nucleus, DNA binding, regulation of transcription, DNA-templated, DNA-binding transcription factor activity, sequence-specific DNA binding
Prupe.3G107900	-11.0126	3.72611e-05	3435	protein trichome birefringence-like 43	GO:0016413, GO:0005794	O-acetyltransferase activity, Golgi apparatus
Prupe.1G241500	-2.95746	3.75501e-05	3674	protein SIEVE ELEMENT OCCLUSION B	GO:0010088	phloem development
Prupe.6G181100	-7.42982	3.78008e-05	3218	probable glucan 1,3-beta-glucosidase A	GO:0016787, GO:0016798, GO:0008152, GO:0005576, GO:0004553, GO:0051015, GO:0007015, GO:0071704, GO:0005975, GO:0005737, GO:0007163, GO:0016477, GO:0051017, GO:0015629, GO:0016985	hydrolase activity, hydrolase activity, acting on glycosyl bonds, metabolic process, extracellular region, hydrolase activity, hydrolyzing O-glycosyl compounds, actin filament binding, actin filament organization, organic substance metabolic process, carbohydrate metabolic process, cytoplasm, establishment or maintenance of cell polarity, cell migration, actin filament bundle assembly, actin cyto…
Prupe.8G180400	-2.15737	3.82424e-05	4489	glutamate receptor 3.2	GO:0016020, GO:0016021, GO:0006811, GO:0034220, GO:0004970, GO:0015276, GO:0005886, GO:0038023	membrane, integral component of membrane, ion transport, ion transmembrane transport, ionotropic glutamate receptor activity, ligand-gated ion channel activity, plasma membrane, signaling receptor activity
Prupe.1G475700	-5.76587	3.84268e-05	1247	---NA---	GO:0016020, GO:0016021	membrane, integral component of membrane
Prupe.6G365300	-3.73545	3.87135e-05	578	uncharacterized LOC18772427	GO:0016020, GO:0016021	membrane, integral component of membrane
Prupe.5G130300	-2.91573	3.89357e-05	2038	---NA---	GO:0005634, GO:0046983, GO:0003700, GO:0000976, GO:0006355	nucleus, protein dimerization activity, DNA-binding transcription factor activity, transcription regulatory region sequence-specific DNA binding, regulation of transcription, DNA-templated
Prupe.4G019600	-2.39888	3.95126e-05	3151	ankyrin repeat domain-containing protein 13B	GO:0016020, GO:0005737, GO:0005515	membrane, cytoplasm, protein binding
Prupe.4G289500	-6.01552	3.97312e-05	907	---NA---	#N/A	#N/A
Prupe.7G072600	3.48326	4.00648e-05	1201	---NA---	GO:0043086, GO:0005515	negative regulation of catalytic activity, protein binding
Prupe.6G167900	-5.90884	4.01042e-05	534	---NA---	#N/A	#N/A
Prupe.4G235400	8.53954	4.07812e-05	296	---NA---	#N/A	#N/A
[truncated: 1,838 more rows]

## Sheet: TNLvsTRL
Gene.ID	log2FoldChange	padj	Gene Length	NR Description	GO IDs	GO Names
[truncated: 2,064 more rows]

## Sheet: CNRvsCRR
Gene.ID	log2FoldChange	padj	Gene Length	NR Description	GO IDs	GO Names
Prupe.6G199800	-6.80819	1.0515e-250	3735	disease resistance protein RPM1	GO:0043531, GO:0006952, GO:0005515	ADP binding, defense response, protein binding
[truncated: 1,346 more rows]

## Sheet: TNRvsTRR
Gene.ID	log2FoldChange	padj	Gene Length	NR Description	GO IDs	GO Names
[truncated: 1,559 more rows]

[truncated: 4 more sheets: CNLvsCNR, CRLvsCRR, TNLvsTNR, TRLvsTRR]
