# Supplementary material for: Morphological, Physiological, Biochemical, and Transcriptome Studies Reveal The Importance of Different Component Traits During Salinity Stress in Prunus
Source: Research Square preprint supplement (doi:10.21203/rs.3.rs-659140/v1), 2021-07-07
Supplement: Supplementary file 6 [file 5dc40e4ed72fe7f0a1a28a7b.xlsx]

## Sheet: TNLvsCNL
Supplemental Table S11. Differentially expressed genes (DEGs) encoding transporters. Different sheets represent different comparisons.
Gene ID	TCDB code	TCDB family	Family Symbol	Superfamily	Regulation
Prupe.1G104100	3.A.1.208.17	The ATP-binding Cassette (ABC) Superfamily	ABC	ABC1, ABC2, ABC3 Superfamilies	Downregulation
Prupe.1G104400	3.A.1.208.17	The ATP-binding Cassette (ABC) Superfamily	ABC	ABC1, ABC2, ABC3 Superfamilies	Downregulation
Prupe.2G137300	2.A.47.2.1	The Divalent Anion:Na<sup>+</sup> Symporter (DASS) Family	DASS	IT Superfamily	Downregulation
Prupe.2G306100	3.A.18.1.1	The Nuclear mRNA Exporter (mRNA-E) Family	mRNA-E	Unclassified	Downregulation
Prupe.4G146400	1.A.12.2.1	The Intracellular Chloride Channel (CLIC) Family	CLIC	Unclassified	Downregulation
Prupe.6G324100	1.A.5.1.1	The Polycystin Cation Channel (PCC) Family	PCC	Leucine-rich Repeat-containing Domain (LRRD) Superfamily	Downregulation
Prupe.6G333400	8.A.30.1.1	The Nedd4-Family Interacting Protein-2 (Nedd4) Family	Nedd4	Synaptotagmin Domain-containing (SynapD) Superfamily	Downregulation
Prupe.6G357200	3.A.3.2.29	The P-type ATPase (P-ATPase) Superfamily	P-ATPase	P-type ATPase (P-ATPase) Superfamily	Downregulation

## Sheet: TRLvsCRL
Gene ID	TCDB code	TCDB family	Family Symbol	Superfamily	Regulation

## Sheet: TNRvsCNR
Gene ID	TCDB code	TCDB family	Family Symbol	Superfamily	Regulation
Prupe.1G356000	2.A.18.6.8	The Amino Acid/Auxin Permease (AAAP) Family	AAAP	APC Superfamily	Upregulation
Prupe.2G020700	3.D.1.6.3	The H<sup>+</sup> or Na<sup>+</sup>-translocating NADH Dehydrogenase (NDH) Family	NDH	Iron-Sulfur Protein (ISP) Superfamily	Upregulation
Prupe.2G130400	3.A.18.1.1	The Nuclear mRNA Exporter (mRNA-E) Family	mRNA-E	Unclassified	Upregulation
Prupe.6G121800	3.A.1.208.17	The ATP-binding Cassette (ABC) Superfamily	ABC	ABC1, ABC2, ABC3 Superfamilies	Upregulation
Prupe.6G354100	1.B.12.5.9	The Autotransporter-1 (AT-1) Family	AT-1	Outer Membrane Pore-forming Protein I (OMPP-I) Superfamily	Downregulation
Prupe.6G360300	2.A.69.3.3	The Auxin Efflux Carrier (AEC) Family	AEC	BART Superfamily	Downregulation

## Sheet: TRRvsCRR
Gene ID	TCDB code	TCDB family	Family Symbol	Superfamily	Regulation

## Sheet: CNLvsCRL
Gene ID	TCDB code	TCDB family	Family Symbol	Superfamily	Regulation
Prupe.1G023400	3.A.3.1.1	The P-type ATPase (P-ATPase) Superfamily	P-ATPase	P-type ATPase (P-ATPase) Superfamily	Upregulation
Prupe.1G045600	2.A.17.1.1	The Proton-dependent Oligopeptide Transporter (POT/PTR) Family	POT/PTR	Major Facilitator (MFS) Superfamily	Upregulation
Prupe.1G054900	1.A.12.2.1	The Intracellular Chloride Channel (CLIC) Family	Unclassified	Unclassified	Upregulation
Prupe.1G055000	1.A.12.2.1	The Intracellular Chloride Channel (CLIC) Family	Unclassified	Unclassified	Upregulation
Prupe.1G056100	1.A.12.2.1	The Intracellular Chloride Channel (CLIC) Family	Unclassified	Unclassified	Upregulation
Prupe.1G073700	3.A.23.1.1	The Type VI Symbiosis/Virulence Secretory System (T6SS) Family	T6SS	ATP-dependent Clp Protease (Clp) Superfamily	Downregulation
Prupe.1G074000	3.A.18.1.1	The Nuclear mRNA Exporter (mRNA-E) Family	Unclassified	Unclassified	Upregulation
Prupe.1G078700	3.A.3.1.1	The P-type ATPase (P-ATPase) Superfamily	P-ATPase	P-type ATPase (P-ATPase) Superfamily	Downregulation
Prupe.1G081200	1.B.12.5.9	The Autotransporter-1 (AT-1) Family	AT-1	Outer Membrane Pore-forming Protein I (OMPP-I) Superfamily	Downregulation
Prupe.1G086500	3.A.16.1.2	The Endoplasmic Reticular Retrotranslocon (ER-RT) Family	ER-RT	AAA-ATPase Superfamily	Downregulation
Prupe.1G098400	8.A.40.1.1	The Tetraspanin (Tetraspanin) Family	Unclassified	Unclassified	Upregulation
Prupe.1G100100	3.A.18.1.1	The Nuclear mRNA Exporter (mRNA-E) Family	Unclassified	Unclassified	Upregulation
Prupe.1G104300	3.A.1.208.17	The ATP-binding Cassette (ABC) Superfamily	ABC	ABC1, ABC2, ABC3 Superfamilies	Downregulation
Prupe.1G104400	3.A.1.208.17	The ATP-binding Cassette (ABC) Superfamily	ABC	ABC1, ABC2, ABC3 Superfamilies	Upregulation
Prupe.1G110700	9.B.9.1.1	The Urate Transporter (UAT) Family	Unclassified	Unclassified	Downregulation
Prupe.1G116100	1.B.12.5.9	The Autotransporter-1 (AT-1) Family	AT-1	Outer Membrane Pore-forming Protein I (OMPP-I) Superfamily	Downregulation
Prupe.1G138000	8.A.30.1.1	The Nedd4-Family Interacting Protein-2 (Nedd4) Family	Nedd4	Synaptotagmin Domain-containing (SynapD) Superfamily	Upregulation
Prupe.1G140500	1.A.12.1.5	The Intracellular Chloride Channel (CLIC) Family	Unclassified	Unclassified	Upregulation
Prupe.1G151700	3.A.3.5.1	The P-type ATPase (P-ATPase) Superfamily	P-ATPase	P-type ATPase (P-ATPase) Superfamily	Downregulation
Prupe.1G156300	2.A.2.4.1	The Glycoside-Pentoside-Hexuronide (GPH):Cation Symporter Family	GPH	Major Facilitator (MFS) Superfamily	Upregulation
Prupe.1G157000	2.A.2.4.1	The Glycoside-Pentoside-Hexuronide (GPH):Cation Symporter Family	GPH	Major Facilitator (MFS) Superfamily	Downregulation
Prupe.1G162800	1.A.1.2.2	The Voltage-gated Ion Channel (VIC) Superfamily	VIC	VIC Superfamily	Upregulation
Prupe.1G168200	4.C.1.1.3	The Fatty Acid Transporter (FAT) Family	Unclassified	Unclassified	Downregulation
Prupe.1G177000	3.A.18.1.1	The Nuclear mRNA Exporter (mRNA-E) Family	Unclassified	Unclassified	Downregulation
Prupe.1G233800	2.A.18.6.8	The Amino Acid/Auxin Permease (AAAP) Family	AAAP	APC Superfamily	Upregulation
Prupe.1G236100	3.A.1.208.17	The ATP-binding Cassette (ABC) Superfamily	ABC	ABC1, ABC2, ABC3 Superfamilies	Upregulation
Prupe.1G244900	3.A.18.1.1	The Nuclear mRNA Exporter (mRNA-E) Family	Unclassified	Unclassified	Downregulation
Prupe.1G245400	8.A.5.1.2	The Voltage-gated K<sup>+</sup> Channel ÃŽÂ²-subunit (KvÃŽÂ²) Family	Unclassified	Unclassified	Upregulation
Prupe.1G246600	1.B.12.5.9	The Autotransporter-1 (AT-1) Family	AT-1	Outer Membrane Pore-forming Protein I (OMPP-I) Superfamily	Downregulation
Prupe.1G246700	1.B.12.5.9	The Autotransporter-1 (AT-1) Family	AT-1	Outer Membrane Pore-forming Protein I (OMPP-I) Superfamily	Downregulation
Prupe.1G249000	2.A.2.2.2	The Glycoside-Pentoside-Hexuronide (GPH):Cation Symporter Family	GPH	Major Facilitator (MFS) Superfamily	Upregulation
Prupe.1G257200	2.A.7.3.6	The Drug/Metabolite Transporter (DMT) Superfamily	DMT	Drug/Metabolite Transporter (DMT) Superfamily	Upregulation
Prupe.1G257300	2.A.7.3.6	The Drug/Metabolite Transporter (DMT) Superfamily	DMT	Drug/Metabolite Transporter (DMT) Superfamily	Downregulation
Prupe.1G257500	2.A.7.3.6	The Drug/Metabolite Transporter (DMT) Superfamily	DMT	Drug/Metabolite Transporter (DMT) Superfamily	Downregulation
Prupe.1G260900	2.A.6.6.4	The Resistance-Nodulation-Cell Division (RND) Superfamily	RND	Resistance-Nodulation-Cell Division (RND) Superfamily	Upregulation
Prupe.1G264300	2.A.1.42.2	The Major Facilitator Superfamily (MFS)	MFS	Major Facilitator (MFS) Superfamily	Downregulation
Prupe.1G269800	3.A.18.1.1	The Nuclear mRNA Exporter (mRNA-E) Family	Unclassified	Unclassified	Downregulation
Prupe.1G278700	2.A.47.2.1	The Divalent Anion:Na<sup>+</sup> Symporter (DASS) Family	DASS	IT Superfamily	Downregulation
Prupe.1G290800	2.A.49.6.1	The Chloride Carrier/Channel (ClC) Family	Unclassified	Unclassified	Downregulation
Prupe.1G302500	3.A.1.208.17	The ATP-binding Cassette (ABC) Superfamily	ABC	ABC1, ABC2, ABC3 Superfamilies	Downregulation
Prupe.1G323100	3.A.3.5.1	The P-type ATPase (P-ATPase) Superfamily	P-ATPase	P-type ATPase (P-ATPase) Superfamily	Downregulation
Prupe.1G334800	1.C.39.3.5	The Membrane Attack Complex/Perforin (MACPF) Family	MACPF	MACPF Superfamily	Upregulation
Prupe.1G336800	5.B.2.1.6	The Eukaryotic Cytochrome b<sub>561</sub> (Cytb<sub>561</sub>) Family	Cytb561	Major Facilitator (MFS) Superfamily	Downregulation
Prupe.1G339000	8.A.5.1.2	The Voltage-gated K<sup>+</sup> Channel ÃŽÂ²-subunit (KvÃŽÂ²) Family	Unclassified	Unclassified	Upregulation
Prupe.1G343300	3.A.18.1.1	The Nuclear mRNA Exporter (mRNA-E) Family	Unclassified	Unclassified	Upregulation
Prupe.1G346200	2.A.67.1.1	The Oligopeptide Transporter (OPT) Family	Unclassified	Unclassified	Downregulation
Prupe.1G346300	2.A.36.1.1	The Monovalent Cation:Proton Antiporter-1 (CPA1) Family	CPA1	CPA Superfamily	Downregulation
Prupe.1G356000	2.A.18.6.8	The Amino Acid/Auxin Permease (AAAP) Family	AAAP	APC Superfamily	Upregulation
Prupe.1G357100	2.A.108.1.1	The Iron/Lead Transporter (ILT) Family	ILT	LysE Superfamily	Downregulation
Prupe.1G361900	1.B.12.5.9	The Autotransporter-1 (AT-1) Family	AT-1	Outer Membrane Pore-forming Protein I (OMPP-I) Superfamily	Upregulation
Prupe.1G362100	1.B.12.5.9	The Autotransporter-1 (AT-1) Family	AT-1	Outer Membrane Pore-forming Protein I (OMPP-I) Superfamily	Upregulation
Prupe.1G364600	2.A.6.6.4	The Resistance-Nodulation-Cell Division (RND) Superfamily	RND	Resistance-Nodulation-Cell Division (RND) Superfamily	Upregulation
Prupe.1G368500	3.A.11.1.1	The Bacterial Competence-related DNA Transformation Transporter (DNA-T) Family	Unclassified	Unclassified	Upregulation
Prupe.1G376000	1.C.45.1.1	The Plant Defensin (Plant Defensin) Family	PD	Defensin Superfamily	Downregulation
Prupe.1G377900	2.A.49.2.1	The Chloride Carrier/Channel (ClC) Family	Unclassified	Unclassified	Downregulation
Prupe.1G383800	2.A.1.42.2	The Major Facilitator Superfamily (MFS)	MFS	Major Facilitator (MFS) Superfamily	Downregulation
Prupe.1G384600	1.C.67.1.1	The SphH Hemolysin (SphH) Family	Unclassified	Unclassified	Upregulation
Prupe.1G388700	2.A.18.6.8	The Amino Acid/Auxin Permease (AAAP) Family	AAAP	APC Superfamily	Downregulation
Prupe.1G397200	3.E.2.1.1	The Photosynthetic Reaction Center (PRC) Family	Unclassified	Unclassified	Upregulation
Prupe.1G399500	1.A.10.1.1	The Glutamate-gated Ion Channel (GIC) Family of Neurotransmitter Receptors	GIC	VIC Superfamily	Upregulation
Prupe.1G399800	1.A.10.1.1	The Glutamate-gated Ion Channel (GIC) Family of Neurotransmitter Receptors	GIC	VIC Superfamily	Upregulation
Prupe.1G400000	1.A.10.1.1	The Glutamate-gated Ion Channel (GIC) Family of Neurotransmitter Receptors	GIC	VIC Superfamily	Upregulation
Prupe.1G400600	1.A.10.1.1	The Glutamate-gated Ion Channel (GIC) Family of Neurotransmitter Receptors	GIC	VIC Superfamily	Upregulation
Prupe.1G410500	1.A.12.1.5	The Intracellular Chloride Channel (CLIC) Family	Unclassified	Unclassified	Downregulation
Prupe.1G412700	1.A.10.1.1	The Glutamate-gated Ion Channel (GIC) Family of Neurotransmitter Receptors	GIC	VIC Superfamily	Upregulation
Prupe.1G421500	2.A.40.1.1	The Nucleobase/Ascorbate Transporter (NAT) or Nucleobase:Cation Symporter-2 (NCS2) Family	NAT/NCS2	APC Superfamily	Downregulation
Prupe.1G422500	3.A.18.1.1	The Nuclear mRNA Exporter (mRNA-E) Family	Unclassified	Unclassified	Upregulation
Prupe.1G435600	8.A.9.2.1	The rBAT Transport Accessory Protein (rBAT) Family	Unclassified	Unclassified	Upregulation
Prupe.1G444800	2.A.18.6.8	The Amino Acid/Auxin Permease (AAAP) Family	AAAP	APC Superfamily	Downregulation
Prupe.1G452300	2.A.102.1.1	The 4-Toluene Sulfonate Uptake Permease (TSUP) Family	TSUP	Transporter-Opsin-G protein-coupled receptor (TOG) Superfamily	Upregulation
Prupe.1G457900	1.A.1.4.1	The Voltage-gated Ion Channel (VIC) Superfamily	VIC	VIC Superfamily	Downregulation
Prupe.1G471400	3.A.1.208.17	The ATP-binding Cassette (ABC) Superfamily	ABC	ABC1, ABC2, ABC3 Superfamilies	Upregulation
Prupe.1G472600	1.A.1.4.1	The Voltage-gated Ion Channel (VIC) Superfamily	VIC	VIC Superfamily	Downregulation
Prupe.1G476800	3.A.18.1.1	The Nuclear mRNA Exporter (mRNA-E) Family	Unclassified	Unclassified	Upregulation
Prupe.1G480500	8.A.30.1.1	The Nedd4-Family Interacting Protein-2 (Nedd4) Family	Nedd4	Synaptotagmin Domain-containing (SynapD) Superfamily	Downregulation
Prupe.1G483200	2.A.66.6.2	The Multidrug/Oligosaccharidyl-lipid/Polysaccharide (MOP) Flippase Superfamily	MOP	Multidrug/Oligosaccharidyl-lipid/Polysaccharide Flippase (MOP) Superfamily	Upregulation
Prupe.1G485400	8.A.21.1.1	The Stomatin/Podocin/Band 7/Nephrosis.2/SPFH (Stomatin) Family	Unclassified	Unclassified	Upregulation
Prupe.1G485600	8.A.21.1.1	The Stomatin/Podocin/Band 7/Nephrosis.2/SPFH (Stomatin) Family	Unclassified	Unclassified	Upregulation
Prupe.1G491000	2.A.18.6.8	The Amino Acid/Auxin Permease (AAAP) Family	AAAP	APC Superfamily	Downregulation
Prupe.1G491100	2.A.18.6.8	The Amino Acid/Auxin Permease (AAAP) Family	AAAP	APC Superfamily	Downregulation
Prupe.1G491300	2.A.18.6.8	The Amino Acid/Auxin Permease (AAAP) Family	AAAP	APC Superfamily	Downregulation
Prupe.1G491400	3.A.7.11.1	The Type IV (Conjugal DNA-Protein Transfer or VirB) Secretory Pathway (IVSP) Family	Unclassified	Unclassified	Upregulation
Prupe.1G492500	2.A.55.1.1	The Metal Ion (Mn<sup>2+</sup>-iron) Transporter (Nramp) Family	Nramp	APC Superfamily	Upregulation
Prupe.1G497400	1.B.12.5.9	The Autotransporter-1 (AT-1) Family	AT-1	Outer Membrane Pore-forming Protein I (OMPP-I) Superfamily	Upregulation
Prupe.1G497600	1.B.12.5.9	The Autotransporter-1 (AT-1) Family	AT-1	Outer Membrane Pore-forming Protein I (OMPP-I) Superfamily	Upregulation
Prupe.1G497700	1.B.12.5.9	The Autotransporter-1 (AT-1) Family	AT-1	Outer Membrane Pore-forming Protein I (OMPP-I) Superfamily	Upregulation
Prupe.1G497900	1.B.12.5.9	The Autotransporter-1 (AT-1) Family	AT-1	Outer Membrane Pore-forming Protein I (OMPP-I) Superfamily	Upregulation
Prupe.1G500400	2.A.7.3.6	The Drug/Metabolite Transporter (DMT) Superfamily	DMT	Drug/Metabolite Transporter (DMT) Superfamily	Downregulation
Prupe.1G500600	2.A.7.3.6	The Drug/Metabolite Transporter (DMT) Superfamily	DMT	Drug/Metabolite Transporter (DMT) Superfamily	Upregulation
Prupe.1G511200	3.A.3.5.1	The P-type ATPase (P-ATPase) Superfamily	P-ATPase	P-type ATPase (P-ATPase) Superfamily	Upregulation
Prupe.1G515200	1.A.31.1.1	The Annexin (Annexin) Family	Unclassified	Unclassified	Downregulation
Prupe.1G519200	3.A.18.1.1	The Nuclear mRNA Exporter (mRNA-E) Family	Unclassified	Unclassified	Downregulation
Prupe.1G523000	8.A.39.1.1	The Homeobox; Penetratin (Penetratin) Family	Unclassified	Unclassified	Downregulation
Prupe.1G524800	2.A.66.1.1	The Multidrug/Oligosaccharidyl-lipid/Polysaccharide (MOP) Flippase Superfamily	MOP	Multidrug/Oligosaccharidyl-lipid/Polysaccharide Flippase (MOP) Superfamily	Downregulation
Prupe.1G526000	1.A.12.2.1	The Intracellular Chloride Channel (CLIC) Family	Unclassified	Unclassified	Upregulation
Prupe.1G547400	1.B.12.5.9	The Autotransporter-1 (AT-1) Family	AT-1	Outer Membrane Pore-forming Protein I (OMPP-I) Superfamily	Downregulation
Prupe.1G547600	1.B.12.5.9	The Autotransporter-1 (AT-1) Family	AT-1	Outer Membrane Pore-forming Protein I (OMPP-I) Superfamily	Downregulation
Prupe.1G558300	2.A.53.1.1	The Sulfate Permease (SulP) Family	SulP	APC Superfamily	Upregulation
Prupe.1G558400	3.A.3.5.1	The P-type ATPase (P-ATPase) Superfamily	P-ATPase	P-type ATPase (P-ATPase) Superfamily	Downregulation
Prupe.1G575200	3.A.18.1.1	The Nuclear mRNA Exporter (mRNA-E) Family	Unclassified	Unclassified	Upregulation
Prupe.1G579200	3.A.18.1.1	The Nuclear mRNA Exporter (mRNA-E) Family	Unclassified	Unclassified	Downregulation
Prupe.1G587500	3.D.1.6.3	The H<sup>+</sup> or Na<sup>+</sup>-translocating NADH Dehydrogenase (NDH) Family	NDH	Iron-Sulfur Protein (ISP) Superfamily	Downregulation
Prupe.1G587600	9.B.64.1.1	The Putative Cholesterol Transporter (Start1) Family	Unclassified	Unclassified	Downregulation
Prupe.2G005300	1.A.5.1.1	The Polycystin Cation Channel (PCC) Family	PCC	Leucine-rich Repeat-containing Domain (LRRD) Superfamily	Downregulation
Prupe.2G007600	8.A.30.1.1	The Nedd4-Family Interacting Protein-2 (Nedd4) Family	Nedd4	Synaptotagmin Domain-containing (SynapD) Superfamily	Downregulation
Prupe.2G009800	3.A.18.1.1	The Nuclear mRNA Exporter (mRNA-E) Family	Unclassified	Unclassified	Downregulation
Prupe.2G021000	3.D.1.6.3	The H<sup>+</sup> or Na<sup>+</sup>-translocating NADH Dehydrogenase (NDH) Family	NDH	Iron-Sulfur Protein (ISP) Superfamily	Downregulation
Prupe.2G021700	3.A.18.1.1	The Nuclear mRNA Exporter (mRNA-E) Family	Unclassified	Unclassified	Downregulation
Prupe.2G024100	2.A.2.4.1	The Glycoside-Pentoside-Hexuronide (GPH):Cation Symporter Family	GPH	Major Facilitator (MFS) Superfamily	Downregulation
Prupe.2G026200	3.A.3.1.1	The P-type ATPase (P-ATPase) Superfamily	P-ATPase	P-type ATPase (P-ATPase) Superfamily	Upregulation
Prupe.2G034900	2.A.29.1.1	The Mitochondrial Carrier (MC) Family	MC	Mitochondrial Carrier (MC) Superfamily	Downregulation
Prupe.2G035100	1.B.12.5.1	The Autotransporter-1 (AT-1) Family	AT-1	Outer Membrane Pore-forming Protein I (OMPP-I) Superfamily	Downregulation
Prupe.2G043500	1.A.10.1.1	The Glutamate-gated Ion Channel (GIC) Family of Neurotransmitter Receptors	GIC	VIC Superfamily	Downregulation
Prupe.2G048900	3.A.18.1.1	The Nuclear mRNA Exporter (mRNA-E) Family	Unclassified	Unclassified	Upregulation
Prupe.2G067800	3.A.3.25.1	The P-type ATPase (P-ATPase) Superfamily	P-ATPase	P-type ATPase (P-ATPase) Superfamily	Downregulation
Prupe.2G071700	3.A.23.1.1	The Type VI Symbiosis/Virulence Secretory System (T6SS) Family	T6SS	ATP-dependent Clp Protease (Clp) Superfamily	Downregulation
Prupe.2G073600	1.A.12.1.5	The Intracellular Chloride Channel (CLIC) Family	Unclassified	Unclassified	Downregulation
Prupe.2G076700	3.A.18.1.1	The Nuclear mRNA Exporter (mRNA-E) Family	Unclassified	Unclassified	Downregulation
Prupe.2G077400	3.A.18.1.1	The Nuclear mRNA Exporter (mRNA-E) Family	Unclassified	Unclassified	Upregulation
Prupe.2G077800	2.A.108.1.1	The Iron/Lead Transporter (ILT) Family	ILT	LysE Superfamily	Downregulation
Prupe.2G080100	1.B.12.5.9	The Autotransporter-1 (AT-1) Family	AT-1	Outer Membrane Pore-forming Protein I (OMPP-I) Superfamily	Downregulation
Prupe.2G080400	3.A.18.1.1	The Nuclear mRNA Exporter (mRNA-E) Family	Unclassified	Unclassified	Downregulation
Prupe.2G080800	1.B.12.5.9	The Autotransporter-1 (AT-1) Family	AT-1	Outer Membrane Pore-forming Protein I (OMPP-I) Superfamily	Downregulation
Prupe.2G094300	1.A.12.1.5	The Intracellular Chloride Channel (CLIC) Family	Unclassified	Unclassified	Upregulation
Prupe.2G097700	1.C.4.1.1	The Aerolysin Channel-forming Toxin (Aerolysin) Family	Aerolysin	Aerolysin Superfamily	Downregulation
Prupe.2G097800	1.C.4.5.1	The Aerolysin Channel-forming Toxin (Aerolysin) Family	Aerolysin	Aerolysin Superfamily	Downregulation
Prupe.2G099600	3.A.18.1.1	The Nuclear mRNA Exporter (mRNA-E) Family	Unclassified	Unclassified	Upregulation
Prupe.2G105300	1.A.10.1.1	The Glutamate-gated Ion Channel (GIC) Family of Neurotransmitter Receptors	GIC	VIC Superfamily	Downregulation
Prupe.2G105400	1.A.10.1.1	The Glutamate-gated Ion Channel (GIC) Family of Neurotransmitter Receptors	GIC	VIC Superfamily	Upregulation
Prupe.2G105700	1.A.10.1.1	The Glutamate-gated Ion Channel (GIC) Family of Neurotransmitter Receptors	GIC	VIC Superfamily	Upregulation
Prupe.2G110400	2.A.17.1.1	The Proton-dependent Oligopeptide Transporter (POT/PTR) Family	POT/PTR	Major Facilitator (MFS) Superfamily	Upregulation
Prupe.2G116000	3.A.18.1.1	The Nuclear mRNA Exporter (mRNA-E) Family	Unclassified	Unclassified	Upregulation
Prupe.2G116100	3.A.18.1.1	The Nuclear mRNA Exporter (mRNA-E) Family	Unclassified	Unclassified	Upregulation
Prupe.2G116200	3.A.18.1.1	The Nuclear mRNA Exporter (mRNA-E) Family	Unclassified	Unclassified	Upregulation
Prupe.2G127300	8.A.39.1.1	The Homeobox; Penetratin (Penetratin) Family	Unclassified	Unclassified	Downregulation
Prupe.2G128400	3.A.18.1.1	The Nuclear mRNA Exporter (mRNA-E) Family	Unclassified	Unclassified	Upregulation
Prupe.2G128600	3.A.18.1.1	The Nuclear mRNA Exporter (mRNA-E) Family	Unclassified	Unclassified	Upregulation
Prupe.2G128800	3.A.3.1.1	The P-type ATPase (P-ATPase) Superfamily	P-ATPase	P-type ATPase (P-ATPase) Superfamily	Downregulation
Prupe.2G130400	3.A.18.1.1	The Nuclear mRNA Exporter (mRNA-E) Family	Unclassified	Unclassified	Upregulation
Prupe.2G151900	1.B.12.5.1	The Autotransporter-1 (AT-1) Family	AT-1	Outer Membrane Pore-forming Protein I (OMPP-I) Superfamily	Downregulation
Prupe.2G152000	1.B.12.5.1	The Autotransporter-1 (AT-1) Family	AT-1	Outer Membrane Pore-forming Protein I (OMPP-I) Superfamily	Downregulation
Prupe.2G153500	2.A.94.1.1	The Phosphate Permease (Pho1) Family	Pho1	IT Superfamily	Downregulation
Prupe.2G157300	8.A.30.1.1	The Nedd4-Family Interacting Protein-2 (Nedd4) Family	Nedd4	Synaptotagmin Domain-containing (SynapD) Superfamily	Upregulation
Prupe.2G157400	8.A.30.1.1	The Nedd4-Family Interacting Protein-2 (Nedd4) Family	Nedd4	Synaptotagmin Domain-containing (SynapD) Superfamily	Upregulation
Prupe.2G159000	8.A.30.1.1	The Nedd4-Family Interacting Protein-2 (Nedd4) Family	Nedd4	Synaptotagmin Domain-containing (SynapD) Superfamily	Upregulation
Prupe.2G166300	3.A.18.1.1	The Nuclear mRNA Exporter (mRNA-E) Family	Unclassified	Unclassified	Downregulation
Prupe.2G167600	3.A.18.1.1	The Nuclear mRNA Exporter (mRNA-E) Family	Unclassified	Unclassified	Upregulation
Prupe.2G173700	1.F.1.1.1	The Synaptosomal Vesicle Fusion Pore (SVF-Pore) Family	SVF-Pore	AAA-ATPase Superfamily	Upregulation
Prupe.2G174300	5.B.6.1.1	The Transmembrane Epithelial Antigen Protein-3 Ferric Reductase (STEAP) Family	Unclassified	Unclassified	Downregulation
Prupe.2G184900	3.D.1.6.3	The H<sup>+</sup> or Na<sup>+</sup>-translocating NADH Dehydrogenase (NDH) Family	NDH	Iron-Sulfur Protein (ISP) Superfamily	Downregulation
Prupe.2G188200	5.B.2.1.6	The Eukaryotic Cytochrome b<sub>561</sub> (Cytb<sub>561</sub>) Family	Cytb561	Major Facilitator (MFS) Superfamily	Downregulation
Prupe.2G192500	2.A.85.2.1	The Aromatic Acid Exporter (ArAE) Family	ArAE	Major Facilitator (MFS) Superfamily	Downregulation
Prupe.2G194400	8.A.39.1.1	The Homeobox; Penetratin (Penetratin) Family	Unclassified	Unclassified	Upregulation
Prupe.2G197200	3.A.18.1.1	The Nuclear mRNA Exporter (mRNA-E) Family	Unclassified	Unclassified	Downregulation
Prupe.2G218600	3.D.1.6.1	The H<sup>+</sup> or Na<sup>+</sup>-translocating NADH Dehydrogenase (NDH) Family	NDH	Iron-Sulfur Protein (ISP) Superfamily	Downregulation
Prupe.2G219600	3.A.18.1.1	The Nuclear mRNA Exporter (mRNA-E) Family	Unclassified	Unclassified	Downregulation
Prupe.2G222500	1.A.1.2.2	The Voltage-gated Ion Channel (VIC) Superfamily	VIC	VIC Superfamily	Downregulation
Prupe.2G234200	1.A.33.1.1	The Cation Channel-forming Heat Shock Protein-70 (Hsp70) Family	Unclassified	Unclassified	Downregulation
Prupe.2G234300	1.A.33.1.1	The Cation Channel-forming Heat Shock Protein-70 (Hsp70) Family	Unclassified	Unclassified	Downregulation
Prupe.2G234400	1.A.33.1.1	The Cation Channel-forming Heat Shock Protein-70 (Hsp70) Family	Unclassified	Unclassified	Downregulation
Prupe.2G241800	2.A.17.1.1	The Proton-dependent Oligopeptide Transporter (POT/PTR) Family	POT/PTR	Major Facilitator (MFS) Superfamily	Downregulation
Prupe.2G242000	1.B.12.5.1	The Autotransporter-1 (AT-1) Family	AT-1	Outer Membrane Pore-forming Protein I (OMPP-I) Superfamily	Downregulation
Prupe.2G242100	1.B.12.5.1	The Autotransporter-1 (AT-1) Family	AT-1	Outer Membrane Pore-forming Protein I (OMPP-I) Superfamily	Downregulation
Prupe.2G242400	1.B.12.5.1	The Autotransporter-1 (AT-1) Family	AT-1	Outer Membrane Pore-forming Protein I (OMPP-I) Superfamily	Downregulation
Prupe.2G248400	3.A.18.1.1	The Nuclear mRNA Exporter (mRNA-E) Family	Unclassified	Unclassified	Upregulation
Prupe.2G257000	2.A.36.1.1	The Monovalent Cation:Proton Antiporter-1 (CPA1) Family	CPA1	CPA Superfamily	Downregulation
Prupe.2G257600	3.A.18.1.1	The Nuclear mRNA Exporter (mRNA-E) Family	Unclassified	Unclassified	Downregulation
Prupe.2G260700	2.A.17.1.1	The Proton-dependent Oligopeptide Transporter (POT/PTR) Family	POT/PTR	Major Facilitator (MFS) Superfamily	Downregulation
Prupe.2G264300	3.A.18.1.1	The Nuclear mRNA Exporter (mRNA-E) Family	Unclassified	Unclassified	Downregulation
Prupe.2G267300	8.A.30.1.1	The Nedd4-Family Interacting Protein-2 (Nedd4) Family	Nedd4	Synaptotagmin Domain-containing (SynapD) Superfamily	Downregulation
Prupe.2G273500	3.A.16.1.2	The Endoplasmic Reticular Retrotranslocon (ER-RT) Family	ER-RT	AAA-ATPase Superfamily	Upregulation
Prupe.2G274200	2.A.2.4.1	The Glycoside-Pentoside-Hexuronide (GPH):Cation Symporter Family	GPH	Major Facilitator (MFS) Superfamily	Upregulation
Prupe.2G275500	3.A.18.1.1	The Nuclear mRNA Exporter (mRNA-E) Family	Unclassified	Unclassified	Downregulation
Prupe.2G279100	2.A.53.1.1	The Sulfate Permease (SulP) Family	SulP	APC Superfamily	Upregulation
Prupe.2G283600	3.A.18.1.1	The Nuclear mRNA Exporter (mRNA-E) Family	Unclassified	Unclassified	Downregulation
Prupe.2G285500	1.B.12.5.1	The Autotransporter-1 (AT-1) Family	AT-1	Outer Membrane Pore-forming Protein I (OMPP-I) Superfamily	Downregulation
Prupe.2G294700	3.A.3.5.1	The P-type ATPase (P-ATPase) Superfamily	P-ATPase	P-type ATPase (P-ATPase) Superfamily	Downregulation
Prupe.2G299200	2.A.66.1.1	The Multidrug/Oligosaccharidyl-lipid/Polysaccharide (MOP) Flippase Superfamily	MOP	Multidrug/Oligosaccharidyl-lipid/Polysaccharide Flippase (MOP) Superfamily	Downregulation
Prupe.2G299800	5.B.6.1.1	The Transmembrane Epithelial Antigen Protein-3 Ferric Reductase (STEAP) Family	Unclassified	Unclassified	Downregulation
Prupe.2G303100	3.A.1.208.17	The ATP-binding Cassette (ABC) Superfamily	ABC	ABC1, ABC2, ABC3 Superfamilies	Downregulation
Prupe.2G305600	3.A.1.208.17	The ATP-binding Cassette (ABC) Superfamily	ABC	ABC1, ABC2, ABC3 Superfamilies	Downregulation
Prupe.2G320300	3.A.3.5.1	The P-type ATPase (P-ATPase) Superfamily	P-ATPase	P-type ATPase (P-ATPase) Superfamily	Downregulation
Prupe.3G009400	1.A.8.1.1	The Major Intrinsic Protein (MIP) Family	MIP	Major Intrinsic Protein (MIP) Superfamily	Upregulation
Prupe.3G011200	4.C.1.1.3	The Fatty Acid Transporter (FAT) Family	Unclassified	Unclassified	Downregulation
Prupe.3G011300	4.C.1.1.3	The Fatty Acid Transporter (FAT) Family	Unclassified	Unclassified	Downregulation
Prupe.3G013700	4.C.1.1.3	The Fatty Acid Transporter (FAT) Family	Unclassified	Unclassified	Upregulation
Prupe.3G015300	8.A.39.1.1	The Homeobox; Penetratin (Penetratin) Family	Unclassified	Unclassified	Upregulation
Prupe.3G018700	3.A.1.208.17	The ATP-binding Cassette (ABC) Superfamily	ABC	ABC1, ABC2, ABC3 Superfamilies	Upregulation
Prupe.3G024700	3.A.18.1.1	The Nuclear mRNA Exporter (mRNA-E) Family	Unclassified	Unclassified	Upregulation
Prupe.3G025400	2.A.49.6.1	The Chloride Carrier/Channel (ClC) Family	Unclassified	Unclassified	Downregulation
Prupe.3G032200	1.B.12.5.1	The Autotransporter-1 (AT-1) Family	AT-1	Outer Membrane Pore-forming Protein I (OMPP-I) Superfamily	Downregulation
Prupe.3G032600	1.B.12.5.9	The Autotransporter-1 (AT-1) Family	AT-1	Outer Membrane Pore-forming Protein I (OMPP-I) Superfamily	Downregulation
Prupe.3G032700	1.B.12.5.9	The Autotransporter-1 (AT-1) Family	AT-1	Outer Membrane Pore-forming Protein I (OMPP-I) Superfamily	Upregulation
Prupe.3G033300	1.B.12.5.9	The Autotransporter-1 (AT-1) Family	AT-1	Outer Membrane Pore-forming Protein I (OMPP-I) Superfamily	Upregulation
Prupe.3G033500	1.B.12.5.9	The Autotransporter-1 (AT-1) Family	AT-1	Outer Membrane Pore-forming Protein I (OMPP-I) Superfamily	Upregulation
Prupe.3G035800	3.D.1.6.1	The H<sup>+</sup> or Na<sup>+</sup>-translocating NADH Dehydrogenase (NDH) Family	NDH	Iron-Sulfur Protein (ISP) Superfamily	Downregulation
Prupe.3G040000	1.C.57.3.4	The Clostridial Cytotoxin (CCT) Family	CCT	RTX-toxin Superfamily	Downregulation
Prupe.3G041400	8.A.30.1.1	The Nedd4-Family Interacting Protein-2 (Nedd4) Family	Nedd4	Synaptotagmin Domain-containing (SynapD) Superfamily	Upregulation
Prupe.3G045600	3.A.18.1.1	The Nuclear mRNA Exporter (mRNA-E) Family	Unclassified	Unclassified	Downregulation
Prupe.3G051600	3.A.1.208.17	The ATP-binding Cassette (ABC) Superfamily	ABC	ABC1, ABC2, ABC3 Superfamilies	Downregulation
Prupe.3G051700	3.A.1.208.17	The ATP-binding Cassette (ABC) Superfamily	ABC	ABC1, ABC2, ABC3 Superfamilies	Downregulation
Prupe.3G053200	1.A.17.1.12	The Calcium-dependent Chloride Channel (Ca-ClC) Family	CaClC	Anoctamin Superfamily	Downregulation
Prupe.3G056300	3.A.18.1.1	The Nuclear mRNA Exporter (mRNA-E) Family	Unclassified	Unclassified	Downregulation
Prupe.3G059900	3.A.1.208.17	The ATP-binding Cassette (ABC) Superfamily	ABC	ABC1, ABC2, ABC3 Superfamilies	Upregulation
Prupe.3G060000	3.A.1.208.17	The ATP-binding Cassette (ABC) Superfamily	ABC	ABC1, ABC2, ABC3 Superfamilies	Upregulation
Prupe.3G061900	1.A.1.4.1	The Voltage-gated Ion Channel (VIC) Superfamily	VIC	VIC Superfamily	Upregulation
Prupe.3G062300	1.A.1.4.1	The Voltage-gated Ion Channel (VIC) Superfamily	VIC	VIC Superfamily	Upregulation
Prupe.3G063500	1.A.8.1.1	The Major Intrinsic Protein (MIP) Family	MIP	Major Intrinsic Protein (MIP) Superfamily	Downregulation
Prupe.3G065300	1.A.1.4.1	The Voltage-gated Ion Channel (VIC) Superfamily	VIC	VIC Superfamily	Downregulation
Prupe.3G068300	2.A.102.1.1	The 4-Toluene Sulfonate Uptake Permease (TSUP) Family	TSUP	Transporter-Opsin-G protein-coupled receptor (TOG) Superfamily	Downregulation
Prupe.3G068400	2.A.102.1.1	The 4-Toluene Sulfonate Uptake Permease (TSUP) Family	TSUP	Transporter-Opsin-G protein-coupled receptor (TOG) Superfamily	Downregulation
Prupe.3G071100	2.A.2.4.1	The Glycoside-Pentoside-Hexuronide (GPH):Cation Symporter Family	GPH	Major Facilitator (MFS) Superfamily	Downregulation
Prupe.3G077900	2.A.31.1.1	The Anion Exchanger (AE) Family	AE	APC Superfamily	Upregulation
Prupe.3G097600	3.D.1.6.3	The H<sup>+</sup> or Na<sup>+</sup>-translocating NADH Dehydrogenase (NDH) Family	NDH	Iron-Sulfur Protein (ISP) Superfamily	Upregulation
Prupe.3G099200	1.A.1.4.1	The Voltage-gated Ion Channel (VIC) Superfamily	VIC	VIC Superfamily	Downregulation
Prupe.3G125200	2.A.19.1.1	The Ca<sup>2+</sup>:Cation Antiporter (CaCA) Family	CaCA	Cation Diffusion Facilitator (CDF) Superfamily	Downregulation
Prupe.3G153600	1.C.4.5.1	The Aerolysin Channel-forming Toxin (Aerolysin) Family	Aerolysin	Aerolysin Superfamily	Upregulation
Prupe.3G156500	1.C.57.3.4	The Clostridial Cytotoxin (CCT) Family	CCT	RTX-toxin Superfamily	Downregulation
Prupe.3G156600	1.C.57.3.4	The Clostridial Cytotoxin (CCT) Family	CCT	RTX-toxin Superfamily	Downregulation
Prupe.3G162800	8.A.30.1.1	The Nedd4-Family Interacting Protein-2 (Nedd4) Family	Nedd4	Synaptotagmin Domain-containing (SynapD) Superfamily	Upregulation
Prupe.3G162900	8.A.30.1.1	The Nedd4-Family Interacting Protein-2 (Nedd4) Family	Nedd4	Synaptotagmin Domain-containing (SynapD) Superfamily	Upregulation
Prupe.3G171300	3.A.18.1.1	The Nuclear mRNA Exporter (mRNA-E) Family	Unclassified	Unclassified	Downregulation
Prupe.3G192400	2.A.19.1.1	The Ca<sup>2+</sup>:Cation Antiporter (CaCA) Family	CaCA	Cation Diffusion Facilitator (CDF) Superfamily	Downregulation
Prupe.3G199200	3.A.18.1.1	The Nuclear mRNA Exporter (mRNA-E) Family	Unclassified	Unclassified	Downregulation
Prupe.3G208200	1.B.12.5.9	The Autotransporter-1 (AT-1) Family	AT-1	Outer Membrane Pore-forming Protein I (OMPP-I) Superfamily	Downregulation
Prupe.3G208300	1.B.12.5.9	The Autotransporter-1 (AT-1) Family	AT-1	Outer Membrane Pore-forming Protein I (OMPP-I) Superfamily	Downregulation
Prupe.3G231900	1.A.1.2.2	The Voltage-gated Ion Channel (VIC) Superfamily	VIC	VIC Superfamily	Downregulation
Prupe.3G259100	1.A.1.2.2	The Voltage-gated Ion Channel (VIC) Superfamily	VIC	VIC Superfamily	Downregulation
Prupe.3G264100	2.A.47.2.1	The Divalent Anion:Na<sup>+</sup> Symporter (DASS) Family	DASS	IT Superfamily	Downregulation
Prupe.3G270600	1.B.33.1.3	The Outer Membrane Protein Insertion Porin (Bam Complex) (OmpIP) Family	OmpIP	Outer Membrane Pore-forming Protein I (OMPP-I) Superfamily	Downregulation
Prupe.3G273900	3.A.16.1.2	The Endoplasmic Reticular Retrotranslocon (ER-RT) Family	ER-RT	AAA-ATPase Superfamily	Upregulation
Prupe.3G281000	2.A.7.3.6	The Drug/Metabolite Transporter (DMT) Superfamily	DMT	Drug/Metabolite Transporter (DMT) Superfamily	Downregulation
Prupe.3G288900	3.A.18.1.1	The Nuclear mRNA Exporter (mRNA-E) Family	Unclassified	Unclassified	Downregulation
Prupe.3G291000	2.A.6.6.4	The Resistance-Nodulation-Cell Division (RND) Superfamily	RND	Resistance-Nodulation-Cell Division (RND) Superfamily	Downregulation
Prupe.3G300900	2.A.18.6.8	The Amino Acid/Auxin Permease (AAAP) Family	AAAP	APC Superfamily	Upregulation
Prupe.3G303100	3.A.18.1.1	The Nuclear mRNA Exporter (mRNA-E) Family	Unclassified	Unclassified	Downregulation
Prupe.3G304400	3.A.18.1.1	The Nuclear mRNA Exporter (mRNA-E) Family	Unclassified	Unclassified	Downregulation
Prupe.4G008600	5.B.2.1.6	The Eukaryotic Cytochrome b<sub>561</sub> (Cytb<sub>561</sub>) Family	Cytb561	Major Facilitator (MFS) Superfamily	Upregulation
Prupe.4G018800	2.A.108.1.1	The Iron/Lead Transporter (ILT) Family	ILT	LysE Superfamily	Downregulation
Prupe.4G042700	2.A.2.4.1	The Glycoside-Pentoside-Hexuronide (GPH):Cation Symporter Family	GPH	Major Facilitator (MFS) Superfamily	Downregulation
Prupe.4G056600	1.A.10.1.1	The Glutamate-gated Ion Channel (GIC) Family of Neurotransmitter Receptors	GIC	VIC Superfamily	Upregulation
Prupe.4G058900	1.B.12.5.9	The Autotransporter-1 (AT-1) Family	AT-1	Outer Membrane Pore-forming Protein I (OMPP-I) Superfamily	Downregulation
Prupe.4G059000	1.B.12.5.9	The Autotransporter-1 (AT-1) Family	AT-1	Outer Membrane Pore-forming Protein I (OMPP-I) Superfamily	Downregulation
Prupe.4G068500	3.A.8.1.1	The Mitochondrial Protein Translocase (MPT) Family	MPT	Outer Membrane Pore-forming Protein IV (OMPP-IV) Superfamily	Downregulation
Prupe.4G071000	1.B.12.5.9	The Autotransporter-1 (AT-1) Family	AT-1	Outer Membrane Pore-forming Protein I (OMPP-I) Superfamily	Downregulation
Prupe.4G079100	5.B.2.1.6	The Eukaryotic Cytochrome b<sub>561</sub> (Cytb<sub>561</sub>) Family	Cytb561	Major Facilitator (MFS) Superfamily	Downregulation
Prupe.4G083700	2.A.2.4.1	The Glycoside-Pentoside-Hexuronide (GPH):Cation Symporter Family	GPH	Major Facilitator (MFS) Superfamily	Downregulation
Prupe.4G087300	1.I.1.1.1	The Nuclear Pore Complex (NPC) Family	NPC	Ankyrin Repeat Domain-containing (Ank) Superfamily	Downregulation
Prupe.4G092800	1.A.1.2.2	The Voltage-gated Ion Channel (VIC) Superfamily	VIC	VIC Superfamily	Downregulation
Prupe.4G093300	9.B.87.1.1	The Selenoprotein P Receptor (SelP-Receptor) Family	SelP Receptor	Ankyrin Repeat Domain-containing (Ank) Superfamily	Upregulation
Prupe.4G093500	9.B.87.1.1	The Selenoprotein P Receptor (SelP-Receptor) Family	SelP Receptor	Ankyrin Repeat Domain-containing (Ank) Superfamily	Downregulation
Prupe.4G093600	9.B.87.1.1	The Selenoprotein P Receptor (SelP-Receptor) Family	SelP Receptor	Ankyrin Repeat Domain-containing (Ank) Superfamily	Downregulation
Prupe.4G094100	9.B.87.1.1	The Selenoprotein P Receptor (SelP-Receptor) Family	SelP Receptor	Ankyrin Repeat Domain-containing (Ank) Superfamily	Upregulation
Prupe.4G104500	3.A.18.1.1	The Nuclear mRNA Exporter (mRNA-E) Family	Unclassified	Unclassified	Downregulation
Prupe.4G109500	1.A.1.2.2	The Voltage-gated Ion Channel (VIC) Superfamily	VIC	VIC Superfamily	Downregulation
Prupe.4G117000	3.A.18.1.1	The Nuclear mRNA Exporter (mRNA-E) Family	Unclassified	Unclassified	Upregulation
Prupe.4G117100	2.A.5.1.1	The Zinc (Zn<sup>2+</sup>)-Iron (Fe<sup>2+</sup>) Permease (ZIP) Family	Unclassified	Unclassified	Downregulation
Prupe.4G123000	3.A.18.1.1	The Nuclear mRNA Exporter (mRNA-E) Family	Unclassified	Unclassified	Upregulation
Prupe.4G131500	3.A.18.1.1	The Nuclear mRNA Exporter (mRNA-E) Family	Unclassified	Unclassified	Upregulation
Prupe.4G131600	3.A.18.1.1	The Nuclear mRNA Exporter (mRNA-E) Family	Unclassified	Unclassified	Upregulation
Prupe.4G131900	2.A.108.1.1	The Iron/Lead Transporter (ILT) Family	ILT	LysE Superfamily	Downregulation
Prupe.4G137000	2.A.18.6.8	The Amino Acid/Auxin Permease (AAAP) Family	AAAP	APC Superfamily	Downregulation
Prupe.4G145300	1.A.1.4.1	The Voltage-gated Ion Channel (VIC) Superfamily	VIC	VIC Superfamily	Upregulation
Prupe.4G146000	1.A.12.2.1	The Intracellular Chloride Channel (CLIC) Family	Unclassified	Unclassified	Downregulation
Prupe.4G146100	1.A.12.2.1	The Intracellular Chloride Channel (CLIC) Family	Unclassified	Unclassified	Downregulation
Prupe.4G146200	1.A.12.2.1	The Intracellular Chloride Channel (CLIC) Family	Unclassified	Unclassified	Downregulation
Prupe.4G146800	1.A.12.2.1	The Intracellular Chloride Channel (CLIC) Family	Unclassified	Unclassified	Upregulation
Prupe.4G147000	1.A.12.2.1	The Intracellular Chloride Channel (CLIC) Family	Unclassified	Unclassified	Upregulation
Prupe.4G147100	1.A.12.2.1	The Intracellular Chloride Channel (CLIC) Family	Unclassified	Unclassified	Upregulation
Prupe.4G147200	1.A.12.2.1	The Intracellular Chloride Channel (CLIC) Family	Unclassified	Unclassified	Upregulation
Prupe.4G147300	1.A.12.2.1	The Intracellular Chloride Channel (CLIC) Family	Unclassified	Unclassified	Upregulation
Prupe.4G152200	8.A.30.1.1	The Nedd4-Family Interacting Protein-2 (Nedd4) Family	Nedd4	Synaptotagmin Domain-containing (SynapD) Superfamily	Downregulation
Prupe.4G163500	3.A.18.1.1	The Nuclear mRNA Exporter (mRNA-E) Family	Unclassified	Unclassified	Upregulation
Prupe.4G167400	5.A.1.1.1	The Disulfide Bond Oxidoreductase D (DsbD) Family	DsbD	LysE Superfamily	Downregulation
Prupe.4G168100	3.A.1.208.17	The ATP-binding Cassette (ABC) Superfamily	ABC	ABC1, ABC2, ABC3 Superfamilies	Upregulation
Prupe.4G171700	1.A.10.1.1	The Glutamate-gated Ion Channel (GIC) Family of Neurotransmitter Receptors	GIC	VIC Superfamily	Upregulation
Prupe.4G171800	1.A.10.1.1	The Glutamate-gated Ion Channel (GIC) Family of Neurotransmitter Receptors	GIC	VIC Superfamily	Upregulation
Prupe.4G171900	1.A.10.1.1	The Glutamate-gated Ion Channel (GIC) Family of Neurotransmitter Receptors	GIC	VIC Superfamily	Upregulation
Prupe.4G186700	3.A.1.208.17	The ATP-binding Cassette (ABC) Superfamily	ABC	ABC1, ABC2, ABC3 Superfamilies	Downregulation
Prupe.4G191200	1.A.1.4.1	The Voltage-gated Ion Channel (VIC) Superfamily	VIC	VIC Superfamily	Downregulation
Prupe.4G200500	3.D.1.6.3	The H<sup>+</sup> or Na<sup>+</sup>-translocating NADH Dehydrogenase (NDH) Family	NDH	Iron-Sulfur Protein (ISP) Superfamily	Downregulation
Prupe.4G206000	9.B.64.1.1	The Putative Cholesterol Transporter (Start1) Family	Unclassified	Unclassified	Downregulation
Prupe.4G232400	3.A.18.1.1	The Nuclear mRNA Exporter (mRNA-E) Family	Unclassified	Unclassified	Upregulation
Prupe.4G233600	3.A.18.1.1	The Nuclear mRNA Exporter (mRNA-E) Family	Unclassified	Unclassified	Upregulation
Prupe.4G234200	3.A.18.1.1	The Nuclear mRNA Exporter (mRNA-E) Family	Unclassified	Unclassified	Upregulation
Prupe.4G235300	3.A.1.208.17	The ATP-binding Cassette (ABC) Superfamily	ABC	ABC1, ABC2, ABC3 Superfamilies	Upregulation
Prupe.4G237600	3.A.16.1.2	The Endoplasmic Reticular Retrotranslocon (ER-RT) Family	ER-RT	AAA-ATPase Superfamily	Downregulation
Prupe.4G244400	2.A.29.1.1	The Mitochondrial Carrier (MC) Family	MC	Mitochondrial Carrier (MC) Superfamily	Downregulation
Prupe.4G246600	3.A.18.1.1	The Nuclear mRNA Exporter (mRNA-E) Family	Unclassified	Unclassified	Upregulation
Prupe.4G255100	3.A.18.1.1	The Nuclear mRNA Exporter (mRNA-E) Family	Unclassified	Unclassified	Downregulation
Prupe.4G272400	3.A.1.208.17	The ATP-binding Cassette (ABC) Superfamily	ABC	ABC1, ABC2, ABC3 Superfamilies	Downregulation
Prupe.4G277700	2.A.18.6.8	The Amino Acid/Auxin Permease (AAAP) Family	AAAP	APC Superfamily	Downregulation
Prupe.4G283500	2.A.36.1.1	The Monovalent Cation:Proton Antiporter-1 (CPA1) Family	CPA1	CPA Superfamily	Upregulation
Prupe.4G283900	1.A.11.3.1	The Ammonium Transporter Channel (Amt) Family	Unclassified	Unclassified	Upregulation
Prupe.5G004300	2.A.69.3.3	The Auxin Efflux Carrier (AEC) Family	AEC	BART Superfamily	Downregulation
Prupe.5G004800	3.D.1.6.3	The H<sup>+</sup> or Na<sup>+</sup>-translocating NADH Dehydrogenase (NDH) Family	NDH	Iron-Sulfur Protein (ISP) Superfamily	Downregulation
Prupe.5G073600	2.A.17.1.1	The Proton-dependent Oligopeptide Transporter (POT/PTR) Family	POT/PTR	Major Facilitator (MFS) Superfamily	Downregulation
Prupe.5G075700	2.A.108.1.1	The Iron/Lead Transporter (ILT) Family	ILT	LysE Superfamily	Downregulation
Prupe.5G084500	2.A.7.15.3	The Drug/Metabolite Transporter (DMT) Superfamily	DMT	Drug/Metabolite Transporter (DMT) Superfamily	Downregulation
Prupe.5G085700	1.B.12.5.1	The Autotransporter-1 (AT-1) Family	AT-1	Outer Membrane Pore-forming Protein I (OMPP-I) Superfamily	Downregulation
Prupe.5G092500	1.A.1.20.1	The Voltage-gated Ion Channel (VIC) Superfamily	VIC	VIC Superfamily	Upregulation
Prupe.5G098200	8.A.30.1.1	The Nedd4-Family Interacting Protein-2 (Nedd4) Family	Nedd4	Synaptotagmin Domain-containing (SynapD) Superfamily	Downregulation
Prupe.5G112700	3.A.1.208.17	The ATP-binding Cassette (ABC) Superfamily	ABC	ABC1, ABC2, ABC3 Superfamilies	Downregulation
Prupe.5G119200	1.C.66.1.1	The Puroindoline (Puroindoline) Family	Unclassified	Unclassified	Upregulation
Prupe.5G130800	1.C.57.3.4	The Clostridial Cytotoxin (CCT) Family	CCT	RTX-toxin Superfamily	Downregulation
Prupe.5G133500	1.B.12.5.1	The Autotransporter-1 (AT-1) Family	AT-1	Outer Membrane Pore-forming Protein I (OMPP-I) Superfamily	Upregulation
Prupe.5G140900	1.A.13.2.1	The Epithelial Chloride Channel (E-ClC) Family	Unclassified	Unclassified	Downregulation
Prupe.5G148500	3.A.3.5.1	The P-type ATPase (P-ATPase) Superfamily	P-ATPase	P-type ATPase (P-ATPase) Superfamily	Downregulation
Prupe.5G157800	1.B.12.5.9	The Autotransporter-1 (AT-1) Family	AT-1	Outer Membrane Pore-forming Protein I (OMPP-I) Superfamily	Downregulation
Prupe.5G162000	1.A.1.2.2	The Voltage-gated Ion Channel (VIC) Superfamily	VIC	VIC Superfamily	Downregulation
Prupe.5G169700	3.A.18.1.1	The Nuclear mRNA Exporter (mRNA-E) Family	Unclassified	Unclassified	Downregulation
Prupe.5G191500	1.A.12.2.1	The Intracellular Chloride Channel (CLIC) Family	Unclassified	Unclassified	Upregulation
Prupe.5G192600	1.A.12.2.1	The Intracellular Chloride Channel (CLIC) Family	Unclassified	Unclassified	Upregulation
Prupe.5G192700	1.A.12.2.1	The Intracellular Chloride Channel (CLIC) Family	Unclassified	Unclassified	Upregulation
Prupe.5G192800	1.A.12.2.1	The Intracellular Chloride Channel (CLIC) Family	Unclassified	Unclassified	Upregulation
Prupe.5G220900	3.A.3.2.29	The P-type ATPase (P-ATPase) Superfamily	P-ATPase	P-type ATPase (P-ATPase) Superfamily	Downregulation
Prupe.5G228100	1.A.12.2.1	The Intracellular Chloride Channel (CLIC) Family	Unclassified	Unclassified	Upregulation
Prupe.5G229600	3.A.1.208.17	The ATP-binding Cassette (ABC) Superfamily	ABC	ABC1, ABC2, ABC3 Superfamilies	Downregulation
Prupe.5G231100	2.A.108.1.1	The Iron/Lead Transporter (ILT) Family	ILT	LysE Superfamily	Upregulation
Prupe.5G233100	2.A.69.3.3	The Auxin Efflux Carrier (AEC) Family	AEC	BART Superfamily	Downregulation
Prupe.5G236500	2.A.72.1.1	The K<sup>+</sup> Uptake Permease (KUP) Family	KUP	APC Superfamily	Downregulation
Prupe.5G237200	1.C.4.5.1	The Aerolysin Channel-forming Toxin (Aerolysin) Family	Aerolysin	Aerolysin Superfamily	Downregulation
Prupe.5G241700	2.A.66.6.2	The Multidrug/Oligosaccharidyl-lipid/Polysaccharide (MOP) Flippase Superfamily	MOP	Multidrug/Oligosaccharidyl-lipid/Polysaccharide Flippase (MOP) Superfamily	Downregulation
Prupe.6G005500	3.A.2.2.3	The H<sup>+</sup>- or Na<sup>+</sup>-translocating F-type, V-type and A-type ATPase (F-ATPase) Superfamily	Unclassified	Unclassified	Upregulation
Prupe.6G007500	3.A.3.5.1	The P-type ATPase (P-ATPase) Superfamily	P-ATPase	P-type ATPase (P-ATPase) Superfamily	Upregulation
Prupe.6G007600	1.A.56.1.1	The Copper Transporter (Ctr) Family	Unclassified	Unclassified	Upregulation
Prupe.6G009700	3.A.18.1.1	The Nuclear mRNA Exporter (mRNA-E) Family	Unclassified	Unclassified	Downregulation
Prupe.6G014400	9.B.119.1.1	The Glycan Synthase, Fks1 (Fks1) Family	Unclassified	Unclassified	Downregulation
Prupe.6G015500	3.A.18.1.1	The Nuclear mRNA Exporter (mRNA-E) Family	Unclassified	Unclassified	Upregulation
Prupe.6G015600	3.A.18.1.1	The Nuclear mRNA Exporter (mRNA-E) Family	Unclassified	Unclassified	Upregulation
Prupe.6G018300	4.C.1.1.3	The Fatty Acid Transporter (FAT) Family	Unclassified	Unclassified	Downregulation
Prupe.6G018400	8.A.30.1.1	The Nedd4-Family Interacting Protein-2 (Nedd4) Family	Nedd4	Synaptotagmin Domain-containing (SynapD) Superfamily	Downregulation
Prupe.6G026100	2.A.67.1.1	The Oligopeptide Transporter (OPT) Family	Unclassified	Unclassified	Upregulation
Prupe.6G026200	2.A.67.1.1	The Oligopeptide Transporter (OPT) Family	Unclassified	Unclassified	Upregulation
Prupe.6G026300	2.A.67.1.1	The Oligopeptide Transporter (OPT) Family	Unclassified	Unclassified	Upregulation
Prupe.6G030400	3.A.3.5.1	The P-type ATPase (P-ATPase) Superfamily	P-ATPase	P-type ATPase (P-ATPase) Superfamily	Upregulation
Prupe.6G031400	1.B.12.5.1	The Autotransporter-1 (AT-1) Family	AT-1	Outer Membrane Pore-forming Protein I (OMPP-I) Superfamily	Downregulation
Prupe.6G040700	1.A.12.2.1	The Intracellular Chloride Channel (CLIC) Family	Unclassified	Unclassified	Upregulation
Prupe.6G051200	3.D.1.6.3	The H<sup>+</sup> or Na<sup>+</sup>-translocating NADH Dehydrogenase (NDH) Family	NDH	Iron-Sulfur Protein (ISP) Superfamily	Upregulation
Prupe.6G051300	3.D.1.6.3	The H<sup>+</sup> or Na<sup>+</sup>-translocating NADH Dehydrogenase (NDH) Family	NDH	Iron-Sulfur Protein (ISP) Superfamily	Upregulation
Prupe.6G053300	1.I.1.1.1	The Nuclear Pore Complex (NPC) Family	NPC	Ankyrin Repeat Domain-containing (Ank) Superfamily	Downregulation
Prupe.6G061300	2.A.108.1.1	The Iron/Lead Transporter (ILT) Family	ILT	LysE Superfamily	Downregulation
Prupe.6G072100	2.A.108.1.1	The Iron/Lead Transporter (ILT) Family	ILT	LysE Superfamily	Downregulation
Prupe.6G074700	3.A.18.1.1	The Nuclear mRNA Exporter (mRNA-E) Family	Unclassified	Unclassified	Upregulation
Prupe.6G074900	3.A.18.1.1	The Nuclear mRNA Exporter (mRNA-E) Family	Unclassified	Unclassified	Downregulation
Prupe.6G080400	2.A.53.3.8	The Sulfate Permease (SulP) Family	SulP	APC Superfamily	Upregulation
Prupe.6G089100	2.A.108.1.1	The Iron/Lead Transporter (ILT) Family	ILT	LysE Superfamily	Downregulation
Prupe.6G089300	2.A.108.1.1	The Iron/Lead Transporter (ILT) Family	ILT	LysE Superfamily	Downregulation
Prupe.6G091900	2.A.17.1.1	The Proton-dependent Oligopeptide Transporter (POT/PTR) Family	POT/PTR	Major Facilitator (MFS) Superfamily	Downregulation
Prupe.6G094300	8.A.5.1.2	The Voltage-gated K<sup>+</sup> Channel ÃŽÂ²-subunit (KvÃŽÂ²) Family	Unclassified	Unclassified	Downregulation
Prupe.6G103500	2.A.7.15.3	The Drug/Metabolite Transporter (DMT) Superfamily	DMT	Drug/Metabolite Transporter (DMT) Superfamily	Downregulation
Prupe.6G107500	2.A.2.2.2	The Glycoside-Pentoside-Hexuronide (GPH):Cation Symporter Family	GPH	Major Facilitator (MFS) Superfamily	Downregulation
Prupe.6G121200	3.A.1.208.17	The ATP-binding Cassette (ABC) Superfamily	ABC	ABC1, ABC2, ABC3 Superfamilies	Downregulation
Prupe.6G121800	3.A.1.208.17	The ATP-binding Cassette (ABC) Superfamily	ABC	ABC1, ABC2, ABC3 Superfamilies	Upregulation
Prupe.6G126100	3.A.18.1.1	The Nuclear mRNA Exporter (mRNA-E) Family	Unclassified	Unclassified	Upregulation
Prupe.6G134800	8.A.68.1.6	The Endomembrane protein-70 (EMP70) Family	Unclassified	Unclassified	Downregulation
Prupe.6G135600	3.A.18.1.1	The Nuclear mRNA Exporter (mRNA-E) Family	Unclassified	Unclassified	Downregulation
Prupe.6G152900	1.B.12.5.9	The Autotransporter-1 (AT-1) Family	AT-1	Outer Membrane Pore-forming Protein I (OMPP-I) Superfamily	Upregulation
Prupe.6G155100	2.A.108.1.1	The Iron/Lead Transporter (ILT) Family	ILT	LysE Superfamily	Downregulation
Prupe.6G177700	2.A.108.1.1	The Iron/Lead Transporter (ILT) Family	ILT	LysE Superfamily	Downregulation
Prupe.6G179300	3.A.3.5.1	The P-type ATPase (P-ATPase) Superfamily	P-ATPase	P-type ATPase (P-ATPase) Superfamily	Downregulation
Prupe.6G182600	1.A.5.1.1	The Polycystin Cation Channel (PCC) Family	PCC	Leucine-rich Repeat-containing Domain (LRRD) Superfamily	Downregulation
Prupe.6G182700	3.A.8.1.1	The Mitochondrial Protein Translocase (MPT) Family	MPT	Outer Membrane Pore-forming Protein IV (OMPP-IV) Superfamily	Upregulation
Prupe.6G186100	8.A.30.1.1	The Nedd4-Family Interacting Protein-2 (Nedd4) Family	Nedd4	Synaptotagmin Domain-containing (SynapD) Superfamily	Upregulation
Prupe.6G224600	1.B.12.5.1	The Autotransporter-1 (AT-1) Family	AT-1	Outer Membrane Pore-forming Protein I (OMPP-I) Superfamily	Downregulation
Prupe.6G234500	3.A.1.208.17	The ATP-binding Cassette (ABC) Superfamily	ABC	ABC1, ABC2, ABC3 Superfamilies	Upregulation
Prupe.6G249400	1.C.67.1.1	The SphH Hemolysin (SphH) Family	Unclassified	Unclassified	Upregulation
Prupe.6G257700	2.A.108.1.1	The Iron/Lead Transporter (ILT) Family	ILT	LysE Superfamily	Downregulation
Prupe.6G261600	8.A.5.1.2	The Voltage-gated K<sup>+</sup> Channel ÃŽÂ²-subunit (KvÃŽÂ²) Family	Unclassified	Unclassified	Downregulation
Prupe.6G267700	2.A.108.1.1	The Iron/Lead Transporter (ILT) Family	ILT	LysE Superfamily	Upregulation
Prupe.6G271500	2.A.108.1.1	The Iron/Lead Transporter (ILT) Family	ILT	LysE Superfamily	Downregulation
Prupe.6G272900	2.A.1.42.2	The Major Facilitator Superfamily (MFS)	MFS	Major Facilitator (MFS) Superfamily	Downregulation
Prupe.6G281100	3.A.18.1.1	The Nuclear mRNA Exporter (mRNA-E) Family	Unclassified	Unclassified	Upregulation
Prupe.6G281900	1.A.11.3.1	The Ammonium Transporter Channel (Amt) Family	Unclassified	Unclassified	Upregulation
Prupe.6G292800	1.C.66.1.1	The Puroindoline (Puroindoline) Family	Unclassified	Unclassified	Downregulation
Prupe.6G293000	1.C.66.1.1	The Puroindoline (Puroindoline) Family	Unclassified	Unclassified	Downregulation
Prupe.6G296300	3.A.18.1.1	The Nuclear mRNA Exporter (mRNA-E) Family	Unclassified	Unclassified	Downregulation
Prupe.6G303000	2.A.17.1.1	The Proton-dependent Oligopeptide Transporter (POT/PTR) Family	POT/PTR	Major Facilitator (MFS) Superfamily	Downregulation
Prupe.6G306100	3.A.1.208.17	The ATP-binding Cassette (ABC) Superfamily	ABC	ABC1, ABC2, ABC3 Superfamilies	Downregulation
Prupe.6G308500	2.A.7.3.6	The Drug/Metabolite Transporter (DMT) Superfamily	DMT	Drug/Metabolite Transporter (DMT) Superfamily	Downregulation
Prupe.6G321400	3.A.3.5.1	The P-type ATPase (P-ATPase) Superfamily	P-ATPase	P-type ATPase (P-ATPase) Superfamily	Downregulation
Prupe.6G324100	1.A.5.1.1	The Polycystin Cation Channel (PCC) Family	PCC	Leucine-rich Repeat-containing Domain (LRRD) Superfamily	Upregulation
Prupe.6G324200	1.A.5.1.1	The Polycystin Cation Channel (PCC) Family	PCC	Leucine-rich Repeat-containing Domain (LRRD) Superfamily	Upregulation
Prupe.6G324400	1.A.5.1.1	The Polycystin Cation Channel (PCC) Family	PCC	Leucine-rich Repeat-containing Domain (LRRD) Superfamily	Upregulation
Prupe.6G329100	3.A.3.5.1	The P-type ATPase (P-ATPase) Superfamily	P-ATPase	P-type ATPase (P-ATPase) Superfamily	Downregulation
Prupe.6G330300	1.B.12.5.9	The Autotransporter-1 (AT-1) Family	AT-1	Outer Membrane Pore-forming Protein I (OMPP-I) Superfamily	Downregulation
Prupe.6G333400	8.A.30.1.1	The Nedd4-Family Interacting Protein-2 (Nedd4) Family	Nedd4	Synaptotagmin Domain-containing (SynapD) Superfamily	Upregulation
Prupe.6G342100	8.A.5.1.2	The Voltage-gated K<sup>+</sup> Channel ÃŽÂ²-subunit (KvÃŽÂ²) Family	Unclassified	Unclassified	Upregulation
Prupe.6G342300	8.A.5.1.2	The Voltage-gated K<sup>+</sup> Channel ÃŽÂ²-subunit (KvÃŽÂ²) Family	Unclassified	Unclassified	Downregulation
Prupe.6G354100	1.B.12.5.9	The Autotransporter-1 (AT-1) Family	AT-1	Outer Membrane Pore-forming Protein I (OMPP-I) Superfamily	Downregulation
Prupe.6G354200	1.B.12.5.9	The Autotransporter-1 (AT-1) Family	AT-1	Outer Membrane Pore-forming Protein I (OMPP-I) Superfamily	Downregulation
Prupe.6G356800	1.B.12.5.1	The Autotransporter-1 (AT-1) Family	AT-1	Outer Membrane Pore-forming Protein I (OMPP-I) Superfamily	Upregulation
Prupe.6G357200	3.A.3.2.29	The P-type ATPase (P-ATPase) Superfamily	P-ATPase	P-type ATPase (P-ATPase) Superfamily	Upregulation
Prupe.7G000700	1.F.1.1.1	The Synaptosomal Vesicle Fusion Pore (SVF-Pore) Family	SVF-Pore	AAA-ATPase Superfamily	Downregulation
Prupe.7G010300	3.A.7.11.1	The Type IV (Conjugal DNA-Protein Transfer or VirB) Secretory Pathway (IVSP) Family	Unclassified	Unclassified	Downregulation
Prupe.7G016100	8.A.30.1.1	The Nedd4-Family Interacting Protein-2 (Nedd4) Family	Nedd4	Synaptotagmin Domain-containing (SynapD) Superfamily	Downregulation
Prupe.7G026300	2.A.66.1.1	The Multidrug/Oligosaccharidyl-lipid/Polysaccharide (MOP) Flippase Superfamily	MOP	Multidrug/Oligosaccharidyl-lipid/Polysaccharide Flippase (MOP) Superfamily	Downregulation
Prupe.7G031400	2.A.69.3.3	The Auxin Efflux Carrier (AEC) Family	AEC	BART Superfamily	Downregulation
Prupe.7G032900	3.A.18.1.1	The Nuclear mRNA Exporter (mRNA-E) Family	Unclassified	Unclassified	Upregulation
Prupe.7G054100	2.A.7.15.3	The Drug/Metabolite Transporter (DMT) Superfamily	DMT	Drug/Metabolite Transporter (DMT) Superfamily	Downregulation
Prupe.7G056400	3.A.1.208.17	The ATP-binding Cassette (ABC) Superfamily	ABC	ABC1, ABC2, ABC3 Superfamilies	Downregulation
Prupe.7G059200	3.A.18.1.1	The Nuclear mRNA Exporter (mRNA-E) Family	Unclassified	Unclassified	Upregulation
Prupe.7G063100	3.A.18.1.1	The Nuclear mRNA Exporter (mRNA-E) Family	Unclassified	Unclassified	Downregulation
Prupe.7G092000	1.A.12.1.5	The Intracellular Chloride Channel (CLIC) Family	Unclassified	Unclassified	Downregulation
Prupe.7G093400	1.F.1.1.1	The Synaptosomal Vesicle Fusion Pore (SVF-Pore) Family	SVF-Pore	AAA-ATPase Superfamily	Upregulation
Prupe.7G094400	2.A.85.2.1	The Aromatic Acid Exporter (ArAE) Family	ArAE	Major Facilitator (MFS) Superfamily	Downregulation
Prupe.7G097400	3.A.23.1.1	The Type VI Symbiosis/Virulence Secretory System (T6SS) Family	T6SS	ATP-dependent Clp Protease (Clp) Superfamily	Downregulation
Prupe.7G106500	1.A.33.1.1	The Cation Channel-forming Heat Shock Protein-70 (Hsp70) Family	Unclassified	Unclassified	Upregulation
Prupe.7G106700	1.A.33.1.1	The Cation Channel-forming Heat Shock Protein-70 (Hsp70) Family	Unclassified	Unclassified	Upregulation
Prupe.7G106900	1.A.10.1.1	The Glutamate-gated Ion Channel (GIC) Family of Neurotransmitter Receptors	GIC	VIC Superfamily	Downregulation
Prupe.7G108100	1.A.33.1.1	The Cation Channel-forming Heat Shock Protein-70 (Hsp70) Family	Unclassified	Unclassified	Downregulation
Prupe.7G108500	1.A.33.1.1	The Cation Channel-forming Heat Shock Protein-70 (Hsp70) Family	Unclassified	Unclassified	Downregulation
Prupe.7G109100	1.A.12.1.5	The Intracellular Chloride Channel (CLIC) Family	Unclassified	Unclassified	Downregulation
Prupe.7G114000	1.B.12.5.9	The Autotransporter-1 (AT-1) Family	AT-1	Outer Membrane Pore-forming Protein I (OMPP-I) Superfamily	Downregulation
Prupe.7G119400	3.A.8.1.1	The Mitochondrial Protein Translocase (MPT) Family	MPT	Outer Membrane Pore-forming Protein IV (OMPP-IV) Superfamily	Upregulation
Prupe.7G125900	1.A.8.1.1	The Major Intrinsic Protein (MIP) Family	MIP	Major Intrinsic Protein (MIP) Superfamily	Downregulation
Prupe.7G140500	2.A.108.1.1	The Iron/Lead Transporter (ILT) Family	ILT	LysE Superfamily	Downregulation
Prupe.7G142200	1.C.57.3.4	The Clostridial Cytotoxin (CCT) Family	CCT	RTX-toxin Superfamily	Downregulation
Prupe.7G156500	2.A.108.1.1	The Iron/Lead Transporter (ILT) Family	ILT	LysE Superfamily	Downregulation
Prupe.7G162300	1.C.57.3.4	The Clostridial Cytotoxin (CCT) Family	CCT	RTX-toxin Superfamily	Upregulation
Prupe.7G165500	3.A.16.1.2	The Endoplasmic Reticular Retrotranslocon (ER-RT) Family	ER-RT	AAA-ATPase Superfamily	Upregulation
Prupe.7G171000	3.A.8.1.1	The Mitochondrial Protein Translocase (MPT) Family	MPT	Outer Membrane Pore-forming Protein IV (OMPP-IV) Superfamily	Downregulation
Prupe.7G172300	1.B.12.5.9	The Autotransporter-1 (AT-1) Family	AT-1	Outer Membrane Pore-forming Protein I (OMPP-I) Superfamily	Downregulation
Prupe.7G178600	4.C.1.1.3	The Fatty Acid Transporter (FAT) Family	Unclassified	Unclassified	Upregulation
Prupe.7G185200	2.A.69.3.3	The Auxin Efflux Carrier (AEC) Family	AEC	BART Superfamily	Downregulation
Prupe.7G187000	2.A.6.6.5	The Resistance-Nodulation-Cell Division (RND) Superfamily	RND	Resistance-Nodulation-Cell Division (RND) Superfamily	Downregulation
Prupe.7G197100	1.B.12.5.1	The Autotransporter-1 (AT-1) Family	AT-1	Outer Membrane Pore-forming Protein I (OMPP-I) Superfamily	Downregulation
Prupe.7G218600	2.A.66.1.1	The Multidrug/Oligosaccharidyl-lipid/Polysaccharide (MOP) Flippase Superfamily	MOP	Multidrug/Oligosaccharidyl-lipid/Polysaccharide Flippase (MOP) Superfamily	Downregulation
Prupe.7G226500	9.A.60.1.1	The Small Nuclear RNA Exporter (snRNA-E)	Unclassified	Unclassified	Downregulation
Prupe.7G231600	2.A.2.4.1	The Glycoside-Pentoside-Hexuronide (GPH):Cation Symporter Family	GPH	Major Facilitator (MFS) Superfamily	Downregulation
Prupe.7G235300	3.A.1.208.17	The ATP-binding Cassette (ABC) Superfamily	ABC	ABC1, ABC2, ABC3 Superfamilies	Downregulation
Prupe.7G243800	8.A.30.1.1	The Nedd4-Family Interacting Protein-2 (Nedd4) Family	Nedd4	Synaptotagmin Domain-containing (SynapD) Superfamily	Upregulation
Prupe.7G247800	2.A.7.15.3	The Drug/Metabolite Transporter (DMT) Superfamily	DMT	Drug/Metabolite Transporter (DMT) Superfamily	Downregulation
Prupe.8G001900	2.A.17.1.1	The Proton-dependent Oligopeptide Transporter (POT/PTR) Family	POT/PTR	Major Facilitator (MFS) Superfamily	Downregulation
Prupe.8G008800	3.D.1.6.1	The H<sup>+</sup> or Na<sup>+</sup>-translocating NADH Dehydrogenase (NDH) Family	NDH	Iron-Sulfur Protein (ISP) Superfamily	Upregulation
Prupe.8G017400	2.A.123.1.11	The Sweet; PQ-loop; Saliva; MtN3 (Sweet) Family	Sweet	Transporter-Opsin-G protein-coupled receptor (TOG) Superfamily	Downregulation
Prupe.8G018200	2.A.69.3.3	The Auxin Efflux Carrier (AEC) Family	AEC	BART Superfamily	Downregulation
Prupe.8G022000	3.A.18.1.1	The Nuclear mRNA Exporter (mRNA-E) Family	Unclassified	Unclassified	Downregulation
Prupe.8G022900	3.A.1.208.17	The ATP-binding Cassette (ABC) Superfamily	ABC	ABC1, ABC2, ABC3 Superfamilies	Upregulation
Prupe.8G026600	3.A.22.1.1	The Transcription-coupled TREX/TAP Nuclear mRNA Export Complex (TREX) Family	Unclassified	Unclassified	Downregulation
Prupe.8G027700	2.A.89.1.1	The Vacuolar Iron Transporter (VIT) Family	Unclassified	Unclassified	Downregulation
Prupe.8G043000	3.A.18.1.1	The Nuclear mRNA Exporter (mRNA-E) Family	Unclassified	Unclassified	Downregulation
Prupe.8G046800	2.A.108.1.1	The Iron/Lead Transporter (ILT) Family	ILT	LysE Superfamily	Downregulation
Prupe.8G047500	2.A.108.1.1	The Iron/Lead Transporter (ILT) Family	ILT	LysE Superfamily	Downregulation
Prupe.8G047900	2.A.108.1.1	The Iron/Lead Transporter (ILT) Family	ILT	LysE Superfamily	Downregulation
Prupe.8G051400	1.B.12.5.9	The Autotransporter-1 (AT-1) Family	AT-1	Outer Membrane Pore-forming Protein I (OMPP-I) Superfamily	Downregulation
Prupe.8G067800	2.A.29.1.1	The Mitochondrial Carrier (MC) Family	MC	Mitochondrial Carrier (MC) Superfamily	Upregulation
Prupe.8G092600	3.A.16.1.2	The Endoplasmic Reticular Retrotranslocon (ER-RT) Family	ER-RT	AAA-ATPase Superfamily	Upregulation
Prupe.8G095000	2.A.108.1.1	The Iron/Lead Transporter (ILT) Family	ILT	LysE Superfamily	Downregulation
Prupe.8G095400	2.A.108.1.1	The Iron/Lead Transporter (ILT) Family	ILT	LysE Superfamily	Downregulation
Prupe.8G096000	1.C.57.3.4	The Clostridial Cytotoxin (CCT) Family	CCT	RTX-toxin Superfamily	Upregulation
Prupe.8G097000	2.A.108.1.1	The Iron/Lead Transporter (ILT) Family	ILT	LysE Superfamily	Downregulation
Prupe.8G097600	1.A.1.2.2	The Voltage-gated Ion Channel (VIC) Superfamily	VIC	VIC Superfamily	Downregulation
Prupe.8G097800	1.A.1.2.2	The Voltage-gated Ion Channel (VIC) Superfamily	VIC	VIC Superfamily	Downregulation
Prupe.8G100700	2.A.2.4.1	The Glycoside-Pentoside-Hexuronide (GPH):Cation Symporter Family	GPH	Major Facilitator (MFS) Superfamily	Upregulation
Prupe.8G100900	2.A.2.4.1	The Glycoside-Pentoside-Hexuronide (GPH):Cation Symporter Family	GPH	Major Facilitator (MFS) Superfamily	Upregulation
Prupe.8G103900	3.A.11.1.1	The Bacterial Competence-related DNA Transformation Transporter (DNA-T) Family	Unclassified	Unclassified	Downregulation
Prupe.8G104500	3.A.11.1.1	The Bacterial Competence-related DNA Transformation Transporter (DNA-T) Family	Unclassified	Unclassified	Downregulation
Prupe.8G108400	4.C.1.1.3	The Fatty Acid Transporter (FAT) Family	Unclassified	Unclassified	Downregulation
Prupe.8G134500	3.A.18.1.1	The Nuclear mRNA Exporter (mRNA-E) Family	Unclassified	Unclassified	Downregulation
Prupe.8G159000	1.A.8.1.1	The Major Intrinsic Protein (MIP) Family	MIP	Major Intrinsic Protein (MIP) Superfamily	Downregulation
Prupe.8G163100	2.A.18.6.8	The Amino Acid/Auxin Permease (AAAP) Family	AAAP	APC Superfamily	Downregulation
Prupe.8G167600	3.A.18.1.1	The Nuclear mRNA Exporter (mRNA-E) Family	Unclassified	Unclassified	Downregulation
Prupe.8G170400	1.A.23.1.1	The Small Conductance Mechanosensitive Ion Channel (MscS) Family	Unclassified	Unclassified	Upregulation
Prupe.8G180300	2.A.2.2.2	The Glycoside-Pentoside-Hexuronide (GPH):Cation Symporter Family	GPH	Major Facilitator (MFS) Superfamily	Downregulation
Prupe.8G180400	1.A.10.1.1	The Glutamate-gated Ion Channel (GIC) Family of Neurotransmitter Receptors	GIC	VIC Superfamily	Downregulation
Prupe.8G202000	3.A.11.1.1	The Bacterial Competence-related DNA Transformation Transporter (DNA-T) Family	Unclassified	Unclassified	Downregulation
Prupe.8G209600	1.B.12.5.9	The Autotransporter-1 (AT-1) Family	AT-1	Outer Membrane Pore-forming Protein I (OMPP-I) Superfamily	Downregulation
Prupe.8G210200	1.A.12.2.1	The Intracellular Chloride Channel (CLIC) Family	Unclassified	Unclassified	Upregulation
Prupe.8G210300	1.A.12.2.1	The Intracellular Chloride Channel (CLIC) Family	Unclassified	Unclassified	Upregulation
Prupe.8G210400	1.A.12.2.1	The Intracellular Chloride Channel (CLIC) Family	Unclassified	Unclassified	Upregulation
Prupe.8G210500	1.A.12.2.1	The Intracellular Chloride Channel (CLIC) Family	Unclassified	Unclassified	Upregulation
Prupe.8G210600	1.A.12.2.1	The Intracellular Chloride Channel (CLIC) Family	Unclassified	Unclassified	Upregulation
Prupe.8G210700	1.A.12.2.1	The Intracellular Chloride Channel (CLIC) Family	Unclassified	Unclassified	Upregulation
Prupe.8G217400	3.A.18.1.1	The Nuclear mRNA Exporter (mRNA-E) Family	Unclassified	Unclassified	Upregulation
Prupe.8G217600	3.A.18.1.1	The Nuclear mRNA Exporter (mRNA-E) Family	Unclassified	Unclassified	Upregulation
Prupe.8G218300	2.A.17.1.1	The Proton-dependent Oligopeptide Transporter (POT/PTR) Family	POT/PTR	Major Facilitator (MFS) Superfamily	Downregulation
Prupe.8G218400	2.A.17.1.1	The Proton-dependent Oligopeptide Transporter (POT/PTR) Family	POT/PTR	Major Facilitator (MFS) Superfamily	Downregulation
Prupe.8G227100	3.A.18.1.1	The Nuclear mRNA Exporter (mRNA-E) Family	Unclassified	Unclassified	Downregulation
Prupe.8G236900	1.C.67.1.1	The SphH Hemolysin (SphH) Family	Unclassified	Unclassified	Downregulation
Prupe.8G248500	2.A.2.4.1	The Glycoside-Pentoside-Hexuronide (GPH):Cation Symporter Family	GPH	Major Facilitator (MFS) Superfamily	Downregulation
Prupe.8G248700	2.A.2.4.1	The Glycoside-Pentoside-Hexuronide (GPH):Cation Symporter Family	GPH	Major Facilitator (MFS) Superfamily	Downregulation
Prupe.8G254300	1.A.12.1.5	The Intracellular Chloride Channel (CLIC) Family	Unclassified	Unclassified	Upregulation
Prupe.8G256700	2.A.49.6.1	The Chloride Carrier/Channel (ClC) Family	Unclassified	Unclassified	Downregulation
Prupe.I000500	3.A.1.208.17	The ATP-binding Cassette (ABC) Superfamily	ABC	ABC1, ABC2, ABC3 Superfamilies	Upregulation
Prupe.I000600	3.A.1.208.17	The ATP-binding Cassette (ABC) Superfamily	ABC	ABC1, ABC2, ABC3 Superfamilies	Upregulation
Prupe.I000700	3.A.1.208.17	The ATP-binding Cassette (ABC) Superfamily	ABC	ABC1, ABC2, ABC3 Superfamilies	Upregulation
Prupe.I003100	2.A.6.6.4	The Resistance-Nodulation-Cell Division (RND) Superfamily	RND	Resistance-Nodulation-Cell Division (RND) Superfamily	Upregulation

## Sheet: TNLvsTRL
Gene ID	TCDB code	TCDB family	Family Symbol	Superfamily	Regulation
Prupe.1G054900	1.A.12.2.1	The Intracellular Chloride Channel (CLIC) Family	Unclassified	Unclassified	Upregulation
Prupe.1G055000	1.A.12.2.1	The Intracellular Chloride Channel (CLIC) Family	Unclassified	Unclassified	Upregulation
Prupe.1G074000	3.A.18.1.1	The Nuclear mRNA Exporter (mRNA-E) Family	Unclassified	Unclassified	Upregulation
Prupe.1G086500	3.A.16.1.2	The Endoplasmic Reticular Retrotranslocon (ER-RT) Family	ER-RT	AAA-ATPase Superfamily	Downregulation
Prupe.1G104300	3.A.1.208.17	The ATP-binding Cassette (ABC) Superfamily	ABC	ABC1, ABC2, ABC3 Superfamilies	Downregulation
Prupe.1G137600	3.A.3.5.1	The P-type ATPase (P-ATPase) Superfamily	P-ATPase	P-type ATPase (P-ATPase) Superfamily	Downregulation
Prupe.1G138000	8.A.30.1.1	The Nedd4-Family Interacting Protein-2 (Nedd4) Family	Nedd4	Synaptotagmin Domain-containing (SynapD) Superfamily	Upregulation
Prupe.1G151700	3.A.3.5.1	The P-type ATPase (P-ATPase) Superfamily	P-ATPase	P-type ATPase (P-ATPase) Superfamily	Downregulation
Prupe.1G159700	2.A.66.6.2	The Multidrug/Oligosaccharidyl-lipid/Polysaccharide (MOP) Flippase Superfamily	MOP	Multidrug/Oligosaccharidyl-lipid/Polysaccharide Flippase (MOP) Superfamily	Downregulation
Prupe.1G162800	1.A.1.2.2	The Voltage-gated Ion Channel (VIC) Superfamily	VIC	VIC Superfamily	Upregulation
Prupe.1G175700	8.A.5.1.2	The Voltage-gated K<sup>+</sup> Channel ÃŽÂ²-subunit (KvÃŽÂ²) Family	Unclassified	Unclassified	Downregulation
Prupe.1G203800	3.E.2.1.1	The Photosynthetic Reaction Center (PRC) Family	Unclassified	Unclassified	Downregulation
Prupe.1G236100	3.A.1.208.17	The ATP-binding Cassette (ABC) Superfamily	ABC	ABC1, ABC2, ABC3 Superfamilies	Upregulation
Prupe.1G244900	3.A.18.1.1	The Nuclear mRNA Exporter (mRNA-E) Family	Unclassified	Unclassified	Downregulation
Prupe.1G245400	8.A.5.1.2	The Voltage-gated K<sup>+</sup> Channel ÃŽÂ²-subunit (KvÃŽÂ²) Family	Unclassified	Unclassified	Upregulation
Prupe.1G249000	2.A.2.2.2	The Glycoside-Pentoside-Hexuronide (GPH):Cation Symporter Family	GPH	Major Facilitator (MFS) Superfamily	Upregulation
Prupe.1G260900	2.A.6.6.4	The Resistance-Nodulation-Cell Division (RND) Superfamily	RND	Resistance-Nodulation-Cell Division (RND) Superfamily	Upregulation
Prupe.1G264300	2.A.1.42.2	The Major Facilitator Superfamily (MFS)	MFS	Major Facilitator (MFS) Superfamily	Downregulation
Prupe.1G278700	2.A.47.2.1	The Divalent Anion:Na<sup>+</sup> Symporter (DASS) Family	DASS	IT Superfamily	Downregulation
Prupe.1G310300	3.D.1.6.3	The H<sup>+</sup> or Na<sup>+</sup>-translocating NADH Dehydrogenase (NDH) Family	NDH	Iron-Sulfur Protein (ISP) Superfamily	Downregulation
Prupe.1G320200	2.A.66.1.1	The Multidrug/Oligosaccharidyl-lipid/Polysaccharide (MOP) Flippase Superfamily	MOP	Multidrug/Oligosaccharidyl-lipid/Polysaccharide Flippase (MOP) Superfamily	Downregulation
Prupe.1G323100	3.A.3.5.1	The P-type ATPase (P-ATPase) Superfamily	P-ATPase	P-type ATPase (P-ATPase) Superfamily	Downregulation
Prupe.1G325000	8.A.39.1.1	The Homeobox; Penetratin (Penetratin) Family	Unclassified	Unclassified	Downregulation
Prupe.1G334800	1.C.39.3.5	The Membrane Attack Complex/Perforin (MACPF) Family	MACPF	MACPF Superfamily	Upregulation
Prupe.1G335700	3.A.18.1.1	The Nuclear mRNA Exporter (mRNA-E) Family	Unclassified	Unclassified	Downregulation
Prupe.1G339000	8.A.5.1.2	The Voltage-gated K<sup>+</sup> Channel ÃŽÂ²-subunit (KvÃŽÂ²) Family	Unclassified	Unclassified	Upregulation
Prupe.1G346200	2.A.67.1.1	The Oligopeptide Transporter (OPT) Family	Unclassified	Unclassified	Downregulation
Prupe.1G346300	2.A.36.1.1	The Monovalent Cation:Proton Antiporter-1 (CPA1) Family	CPA1	CPA Superfamily	Downregulation
Prupe.1G356000	2.A.18.6.8	The Amino Acid/Auxin Permease (AAAP) Family	AAAP	APC Superfamily	Upregulation
Prupe.1G357100	2.A.108.1.1	The Iron/Lead Transporter (ILT) Family	ILT	LysE Superfamily	Downregulation
Prupe.1G361300	1.B.12.5.1	The Autotransporter-1 (AT-1) Family	AT-1	Outer Membrane Pore-forming Protein I (OMPP-I) Superfamily	Downregulation
Prupe.1G361900	1.B.12.5.9	The Autotransporter-1 (AT-1) Family	AT-1	Outer Membrane Pore-forming Protein I (OMPP-I) Superfamily	Upregulation
Prupe.1G362100	1.B.12.5.9	The Autotransporter-1 (AT-1) Family	AT-1	Outer Membrane Pore-forming Protein I (OMPP-I) Superfamily	Upregulation
Prupe.1G364600	2.A.6.6.4	The Resistance-Nodulation-Cell Division (RND) Superfamily	RND	Resistance-Nodulation-Cell Division (RND) Superfamily	Upregulation
Prupe.1G368500	3.A.11.1.1	The Bacterial Competence-related DNA Transformation Transporter (DNA-T) Family	Unclassified	Unclassified	Upregulation
Prupe.1G377000	9.B.82.1.1	The Endoplasmic Reticulum Retrieval Protein1 (Putative Heavy Metal Transporter) (Rer1) Family	Unclassified	Unclassified	Downregulation
Prupe.1G377900	2.A.49.2.1	The Chloride Carrier/Channel (ClC) Family	Unclassified	Unclassified	Downregulation
Prupe.1G383800	2.A.1.42.2	The Major Facilitator Superfamily (MFS)	MFS	Major Facilitator (MFS) Superfamily	Downregulation
Prupe.1G397200	3.E.2.1.1	The Photosynthetic Reaction Center (PRC) Family	Unclassified	Unclassified	Upregulation
Prupe.1G399800	1.A.10.1.1	The Glutamate-gated Ion Channel (GIC) Family of Neurotransmitter Receptors	GIC	VIC Superfamily	Upregulation
Prupe.1G400300	1.A.10.1.1	The Glutamate-gated Ion Channel (GIC) Family of Neurotransmitter Receptors	GIC	VIC Superfamily	Upregulation
Prupe.1G400600	1.A.10.1.1	The Glutamate-gated Ion Channel (GIC) Family of Neurotransmitter Receptors	GIC	VIC Superfamily	Upregulation
Prupe.1G410500	1.A.12.1.5	The Intracellular Chloride Channel (CLIC) Family	Unclassified	Unclassified	Downregulation
Prupe.1G412700	1.A.10.1.1	The Glutamate-gated Ion Channel (GIC) Family of Neurotransmitter Receptors	GIC	VIC Superfamily	Upregulation
Prupe.1G427800	3.A.18.1.1	The Nuclear mRNA Exporter (mRNA-E) Family	Unclassified	Unclassified	Downregulation
Prupe.1G433200	1.B.12.5.1	The Autotransporter-1 (AT-1) Family	AT-1	Outer Membrane Pore-forming Protein I (OMPP-I) Superfamily	Downregulation
Prupe.1G452300	2.A.102.1.1	The 4-Toluene Sulfonate Uptake Permease (TSUP) Family	TSUP	Transporter-Opsin-G protein-coupled receptor (TOG) Superfamily	Upregulation
Prupe.1G472500	2.A.31.1.1	The Anion Exchanger (AE) Family	AE	APC Superfamily	Upregulation
Prupe.1G472600	1.A.1.4.1	The Voltage-gated Ion Channel (VIC) Superfamily	VIC	VIC Superfamily	Downregulation
Prupe.1G476800	3.A.18.1.1	The Nuclear mRNA Exporter (mRNA-E) Family	Unclassified	Unclassified	Upregulation
Prupe.1G480500	8.A.30.1.1	The Nedd4-Family Interacting Protein-2 (Nedd4) Family	Nedd4	Synaptotagmin Domain-containing (SynapD) Superfamily	Downregulation
Prupe.1G483200	2.A.66.6.2	The Multidrug/Oligosaccharidyl-lipid/Polysaccharide (MOP) Flippase Superfamily	MOP	Multidrug/Oligosaccharidyl-lipid/Polysaccharide Flippase (MOP) Superfamily	Upregulation
Prupe.1G485400	8.A.21.1.1	The Stomatin/Podocin/Band 7/Nephrosis.2/SPFH (Stomatin) Family	Unclassified	Unclassified	Upregulation
Prupe.1G485600	8.A.21.1.1	The Stomatin/Podocin/Band 7/Nephrosis.2/SPFH (Stomatin) Family	Unclassified	Unclassified	Upregulation
Prupe.1G491000	2.A.18.6.8	The Amino Acid/Auxin Permease (AAAP) Family	AAAP	APC Superfamily	Downregulation
Prupe.1G491300	2.A.18.6.8	The Amino Acid/Auxin Permease (AAAP) Family	AAAP	APC Superfamily	Downregulation
Prupe.1G491400	3.A.7.11.1	The Type IV (Conjugal DNA-Protein Transfer or VirB) Secretory Pathway (IVSP) Family	Unclassified	Unclassified	Upregulation
Prupe.1G492500	2.A.55.1.1	The Metal Ion (Mn<sup>2+</sup>-iron) Transporter (Nramp) Family	Nramp	APC Superfamily	Upregulation
Prupe.1G497400	1.B.12.5.9	The Autotransporter-1 (AT-1) Family	AT-1	Outer Membrane Pore-forming Protein I (OMPP-I) Superfamily	Upregulation
Prupe.1G497600	1.B.12.5.9	The Autotransporter-1 (AT-1) Family	AT-1	Outer Membrane Pore-forming Protein I (OMPP-I) Superfamily	Upregulation
Prupe.1G497900	1.B.12.5.9	The Autotransporter-1 (AT-1) Family	AT-1	Outer Membrane Pore-forming Protein I (OMPP-I) Superfamily	Upregulation
Prupe.1G500600	2.A.7.3.6	The Drug/Metabolite Transporter (DMT) Superfamily	DMT	Drug/Metabolite Transporter (DMT) Superfamily	Upregulation
Prupe.1G515200	1.A.31.1.1	The Annexin (Annexin) Family	Unclassified	Unclassified	Downregulation
Prupe.1G516400	1.C.67.1.1	The SphH Hemolysin (SphH) Family	Unclassified	Unclassified	Upregulation
Prupe.1G524800	2.A.66.1.1	The Multidrug/Oligosaccharidyl-lipid/Polysaccharide (MOP) Flippase Superfamily	MOP	Multidrug/Oligosaccharidyl-lipid/Polysaccharide Flippase (MOP) Superfamily	Downregulation
Prupe.1G525200	2.A.66.1.1	The Multidrug/Oligosaccharidyl-lipid/Polysaccharide (MOP) Flippase Superfamily	MOP	Multidrug/Oligosaccharidyl-lipid/Polysaccharide Flippase (MOP) Superfamily	Downregulation
Prupe.1G526000	1.A.12.2.1	The Intracellular Chloride Channel (CLIC) Family	Unclassified	Unclassified	Upregulation
Prupe.1G558400	3.A.3.5.1	The P-type ATPase (P-ATPase) Superfamily	P-ATPase	P-type ATPase (P-ATPase) Superfamily	Downregulation
Prupe.1G575200	3.A.18.1.1	The Nuclear mRNA Exporter (mRNA-E) Family	Unclassified	Unclassified	Upregulation
Prupe.1G579200	3.A.18.1.1	The Nuclear mRNA Exporter (mRNA-E) Family	Unclassified	Unclassified	Downregulation
Prupe.1G587500	3.D.1.6.3	The H<sup>+</sup> or Na<sup>+</sup>-translocating NADH Dehydrogenase (NDH) Family	NDH	Iron-Sulfur Protein (ISP) Superfamily	Downregulation
Prupe.1G587600	9.B.64.1.1	The Putative Cholesterol Transporter (Start1) Family	Unclassified	Unclassified	Downregulation
Prupe.2G005300	1.A.5.1.1	The Polycystin Cation Channel (PCC) Family	PCC	Leucine-rich Repeat-containing Domain (LRRD) Superfamily	Downregulation
Prupe.2G009800	3.A.18.1.1	The Nuclear mRNA Exporter (mRNA-E) Family	Unclassified	Unclassified	Downregulation
Prupe.2G021000	3.D.1.6.3	The H<sup>+</sup> or Na<sup>+</sup>-translocating NADH Dehydrogenase (NDH) Family	NDH	Iron-Sulfur Protein (ISP) Superfamily	Downregulation
Prupe.2G021700	3.A.18.1.1	The Nuclear mRNA Exporter (mRNA-E) Family	Unclassified	Unclassified	Downregulation
Prupe.2G024100	2.A.2.4.1	The Glycoside-Pentoside-Hexuronide (GPH):Cation Symporter Family	GPH	Major Facilitator (MFS) Superfamily	Downregulation
Prupe.2G027900	2.A.6.6.4	The Resistance-Nodulation-Cell Division (RND) Superfamily	RND	Resistance-Nodulation-Cell Division (RND) Superfamily	Downregulation
Prupe.2G035100	1.B.12.5.1	The Autotransporter-1 (AT-1) Family	AT-1	Outer Membrane Pore-forming Protein I (OMPP-I) Superfamily	Downregulation
Prupe.2G043500	1.A.10.1.1	The Glutamate-gated Ion Channel (GIC) Family of Neurotransmitter Receptors	GIC	VIC Superfamily	Downregulation
Prupe.2G057600	3.A.18.1.1	The Nuclear mRNA Exporter (mRNA-E) Family	Unclassified	Unclassified	Upregulation
Prupe.2G061800	3.A.3.1.1	The P-type ATPase (P-ATPase) Superfamily	P-ATPase	P-type ATPase (P-ATPase) Superfamily	Downregulation
Prupe.2G076700	3.A.18.1.1	The Nuclear mRNA Exporter (mRNA-E) Family	Unclassified	Unclassified	Downregulation
Prupe.2G077400	3.A.18.1.1	The Nuclear mRNA Exporter (mRNA-E) Family	Unclassified	Unclassified	Upregulation
Prupe.2G077800	2.A.108.1.1	The Iron/Lead Transporter (ILT) Family	ILT	LysE Superfamily	Downregulation
Prupe.2G080100	1.B.12.5.9	The Autotransporter-1 (AT-1) Family	AT-1	Outer Membrane Pore-forming Protein I (OMPP-I) Superfamily	Downregulation
Prupe.2G080400	3.A.18.1.1	The Nuclear mRNA Exporter (mRNA-E) Family	Unclassified	Unclassified	Downregulation
Prupe.2G080800	1.B.12.5.9	The Autotransporter-1 (AT-1) Family	AT-1	Outer Membrane Pore-forming Protein I (OMPP-I) Superfamily	Downregulation
Prupe.2G094300	1.A.12.1.5	The Intracellular Chloride Channel (CLIC) Family	Unclassified	Unclassified	Upregulation
Prupe.2G099600	3.A.18.1.1	The Nuclear mRNA Exporter (mRNA-E) Family	Unclassified	Unclassified	Upregulation
Prupe.2G105400	1.A.10.1.1	The Glutamate-gated Ion Channel (GIC) Family of Neurotransmitter Receptors	GIC	VIC Superfamily	Upregulation
Prupe.2G105700	1.A.10.1.1	The Glutamate-gated Ion Channel (GIC) Family of Neurotransmitter Receptors	GIC	VIC Superfamily	Upregulation
Prupe.2G116000	3.A.18.1.1	The Nuclear mRNA Exporter (mRNA-E) Family	Unclassified	Unclassified	Upregulation
Prupe.2G116100	3.A.18.1.1	The Nuclear mRNA Exporter (mRNA-E) Family	Unclassified	Unclassified	Upregulation
Prupe.2G128600	3.A.18.1.1	The Nuclear mRNA Exporter (mRNA-E) Family	Unclassified	Unclassified	Upregulation
Prupe.2G128800	3.A.3.1.1	The P-type ATPase (P-ATPase) Superfamily	P-ATPase	P-type ATPase (P-ATPase) Superfamily	Downregulation
Prupe.2G130400	3.A.18.1.1	The Nuclear mRNA Exporter (mRNA-E) Family	Unclassified	Unclassified	Upregulation
Prupe.2G153500	2.A.94.1.1	The Phosphate Permease (Pho1) Family	Pho1	IT Superfamily	Downregulation
Prupe.2G157300	8.A.30.1.1	The Nedd4-Family Interacting Protein-2 (Nedd4) Family	Nedd4	Synaptotagmin Domain-containing (SynapD) Superfamily	Upregulation
Prupe.2G157400	8.A.30.1.1	The Nedd4-Family Interacting Protein-2 (Nedd4) Family	Nedd4	Synaptotagmin Domain-containing (SynapD) Superfamily	Upregulation
Prupe.2G166300	3.A.18.1.1	The Nuclear mRNA Exporter (mRNA-E) Family	Unclassified	Unclassified	Downregulation
Prupe.2G204200	3.A.23.1.1	The Type VI Symbiosis/Virulence Secretory System (T6SS) Family	T6SS	ATP-dependent Clp Protease (Clp) Superfamily	Upregulation
Prupe.2G211900	8.A.30.1.1	The Nedd4-Family Interacting Protein-2 (Nedd4) Family	Nedd4	Synaptotagmin Domain-containing (SynapD) Superfamily	Downregulation
Prupe.2G234200	1.A.33.1.1	The Cation Channel-forming Heat Shock Protein-70 (Hsp70) Family	Unclassified	Unclassified	Downregulation
Prupe.2G234300	1.A.33.1.1	The Cation Channel-forming Heat Shock Protein-70 (Hsp70) Family	Unclassified	Unclassified	Downregulation
Prupe.2G234400	1.A.33.1.1	The Cation Channel-forming Heat Shock Protein-70 (Hsp70) Family	Unclassified	Unclassified	Downregulation
Prupe.2G238400	2.A.1.42.2	The Major Facilitator Superfamily (MFS)	MFS	Major Facilitator (MFS) Superfamily	Downregulation
Prupe.2G241800	2.A.17.1.1	The Proton-dependent Oligopeptide Transporter (POT/PTR) Family	POT/PTR	Major Facilitator (MFS) Superfamily	Downregulation
Prupe.2G242000	1.B.12.5.1	The Autotransporter-1 (AT-1) Family	AT-1	Outer Membrane Pore-forming Protein I (OMPP-I) Superfamily	Downregulation
Prupe.2G242100	1.B.12.5.1	The Autotransporter-1 (AT-1) Family	AT-1	Outer Membrane Pore-forming Protein I (OMPP-I) Superfamily	Downregulation
Prupe.2G264300	3.A.18.1.1	The Nuclear mRNA Exporter (mRNA-E) Family	Unclassified	Unclassified	Downregulation
Prupe.2G273500	3.A.16.1.2	The Endoplasmic Reticular Retrotranslocon (ER-RT) Family	ER-RT	AAA-ATPase Superfamily	Upregulation
Prupe.2G274200	2.A.2.4.1	The Glycoside-Pentoside-Hexuronide (GPH):Cation Symporter Family	GPH	Major Facilitator (MFS) Superfamily	Upregulation
Prupe.2G285500	1.B.12.5.1	The Autotransporter-1 (AT-1) Family	AT-1	Outer Membrane Pore-forming Protein I (OMPP-I) Superfamily	Downregulation
Prupe.2G299200	2.A.66.1.1	The Multidrug/Oligosaccharidyl-lipid/Polysaccharide (MOP) Flippase Superfamily	MOP	Multidrug/Oligosaccharidyl-lipid/Polysaccharide Flippase (MOP) Superfamily	Downregulation
Prupe.2G305600	3.A.1.208.17	The ATP-binding Cassette (ABC) Superfamily	ABC	ABC1, ABC2, ABC3 Superfamilies	Downregulation
Prupe.2G306100	3.A.18.1.1	The Nuclear mRNA Exporter (mRNA-E) Family	Unclassified	Unclassified	Downregulation
Prupe.3G009400	1.A.8.1.1	The Major Intrinsic Protein (MIP) Family	MIP	Major Intrinsic Protein (MIP) Superfamily	Upregulation
Prupe.3G011200	4.C.1.1.3	The Fatty Acid Transporter (FAT) Family	Unclassified	Unclassified	Downregulation
Prupe.3G011300	4.C.1.1.3	The Fatty Acid Transporter (FAT) Family	Unclassified	Unclassified	Downregulation
Prupe.3G015300	8.A.39.1.1	The Homeobox; Penetratin (Penetratin) Family	Unclassified	Unclassified	Upregulation
Prupe.3G024700	3.A.18.1.1	The Nuclear mRNA Exporter (mRNA-E) Family	Unclassified	Unclassified	Upregulation
Prupe.3G025400	2.A.49.6.1	The Chloride Carrier/Channel (ClC) Family	Unclassified	Unclassified	Downregulation
Prupe.3G032600	1.B.12.5.9	The Autotransporter-1 (AT-1) Family	AT-1	Outer Membrane Pore-forming Protein I (OMPP-I) Superfamily	Downregulation
Prupe.3G033300	1.B.12.5.9	The Autotransporter-1 (AT-1) Family	AT-1	Outer Membrane Pore-forming Protein I (OMPP-I) Superfamily	Upregulation
Prupe.3G033500	1.B.12.5.9	The Autotransporter-1 (AT-1) Family	AT-1	Outer Membrane Pore-forming Protein I (OMPP-I) Superfamily	Upregulation
Prupe.3G035800	3.D.1.6.1	The H<sup>+</sup> or Na<sup>+</sup>-translocating NADH Dehydrogenase (NDH) Family	NDH	Iron-Sulfur Protein (ISP) Superfamily	Downregulation
Prupe.3G037000	3.A.18.1.1	The Nuclear mRNA Exporter (mRNA-E) Family	Unclassified	Unclassified	Downregulation
Prupe.3G040000	1.C.57.3.4	The Clostridial Cytotoxin (CCT) Family	CCT	RTX-toxin Superfamily	Downregulation
Prupe.3G041400	8.A.30.1.1	The Nedd4-Family Interacting Protein-2 (Nedd4) Family	Nedd4	Synaptotagmin Domain-containing (SynapD) Superfamily	Upregulation
Prupe.3G051600	3.A.1.208.17	The ATP-binding Cassette (ABC) Superfamily	ABC	ABC1, ABC2, ABC3 Superfamilies	Downregulation
Prupe.3G051700	3.A.1.208.17	The ATP-binding Cassette (ABC) Superfamily	ABC	ABC1, ABC2, ABC3 Superfamilies	Downregulation
Prupe.3G053200	1.A.17.1.12	The Calcium-dependent Chloride Channel (Ca-ClC) Family	CaClC	Anoctamin Superfamily	Downregulation
Prupe.3G056300	3.A.18.1.1	The Nuclear mRNA Exporter (mRNA-E) Family	Unclassified	Unclassified	Downregulation
Prupe.3G059900	3.A.1.208.17	The ATP-binding Cassette (ABC) Superfamily	ABC	ABC1, ABC2, ABC3 Superfamilies	Upregulation
Prupe.3G061900	1.A.1.4.1	The Voltage-gated Ion Channel (VIC) Superfamily	VIC	VIC Superfamily	Upregulation
Prupe.3G062300	1.A.1.4.1	The Voltage-gated Ion Channel (VIC) Superfamily	VIC	VIC Superfamily	Upregulation
Prupe.3G063500	1.A.8.1.1	The Major Intrinsic Protein (MIP) Family	MIP	Major Intrinsic Protein (MIP) Superfamily	Downregulation
Prupe.3G065300	1.A.1.4.1	The Voltage-gated Ion Channel (VIC) Superfamily	VIC	VIC Superfamily	Downregulation
Prupe.3G071100	2.A.2.4.1	The Glycoside-Pentoside-Hexuronide (GPH):Cation Symporter Family	GPH	Major Facilitator (MFS) Superfamily	Downregulation
Prupe.3G072000	2.A.53.1.1	The Sulfate Permease (SulP) Family	SulP	APC Superfamily	Downregulation
Prupe.3G077900	2.A.31.1.1	The Anion Exchanger (AE) Family	AE	APC Superfamily	Upregulation
Prupe.3G097600	3.D.1.6.3	The H<sup>+</sup> or Na<sup>+</sup>-translocating NADH Dehydrogenase (NDH) Family	NDH	Iron-Sulfur Protein (ISP) Superfamily	Upregulation
Prupe.3G099200	1.A.1.4.1	The Voltage-gated Ion Channel (VIC) Superfamily	VIC	VIC Superfamily	Downregulation
Prupe.3G116000	3.A.18.1.1	The Nuclear mRNA Exporter (mRNA-E) Family	Unclassified	Unclassified	Downregulation
Prupe.3G153600	1.C.4.5.1	The Aerolysin Channel-forming Toxin (Aerolysin) Family	Aerolysin	Aerolysin Superfamily	Upregulation
Prupe.3G154700	1.A.1.4.1	The Voltage-gated Ion Channel (VIC) Superfamily	VIC	VIC Superfamily	Upregulation
Prupe.3G156500	1.C.57.3.4	The Clostridial Cytotoxin (CCT) Family	CCT	RTX-toxin Superfamily	Downregulation
Prupe.3G156600	1.C.57.3.4	The Clostridial Cytotoxin (CCT) Family	CCT	RTX-toxin Superfamily	Downregulation
Prupe.3G162900	8.A.30.1.1	The Nedd4-Family Interacting Protein-2 (Nedd4) Family	Nedd4	Synaptotagmin Domain-containing (SynapD) Superfamily	Upregulation
Prupe.3G199200	3.A.18.1.1	The Nuclear mRNA Exporter (mRNA-E) Family	Unclassified	Unclassified	Downregulation
Prupe.3G202700	5.B.2.1.6	The Eukaryotic Cytochrome b<sub>561</sub> (Cytb<sub>561</sub>) Family	Cytb561	Major Facilitator (MFS) Superfamily	Downregulation
Prupe.3G231900	1.A.1.2.2	The Voltage-gated Ion Channel (VIC) Superfamily	VIC	VIC Superfamily	Downregulation
Prupe.3G259100	1.A.1.2.2	The Voltage-gated Ion Channel (VIC) Superfamily	VIC	VIC Superfamily	Downregulation
Prupe.3G264100	2.A.47.2.1	The Divalent Anion:Na<sup>+</sup> Symporter (DASS) Family	DASS	IT Superfamily	Downregulation
Prupe.3G273900	3.A.16.1.2	The Endoplasmic Reticular Retrotranslocon (ER-RT) Family	ER-RT	AAA-ATPase Superfamily	Upregulation
Prupe.3G280800	2.A.7.3.6	The Drug/Metabolite Transporter (DMT) Superfamily	DMT	Drug/Metabolite Transporter (DMT) Superfamily	Downregulation
Prupe.3G281000	2.A.7.3.6	The Drug/Metabolite Transporter (DMT) Superfamily	DMT	Drug/Metabolite Transporter (DMT) Superfamily	Downregulation
Prupe.3G291000	2.A.6.6.4	The Resistance-Nodulation-Cell Division (RND) Superfamily	RND	Resistance-Nodulation-Cell Division (RND) Superfamily	Downregulation
Prupe.3G304400	3.A.18.1.1	The Nuclear mRNA Exporter (mRNA-E) Family	Unclassified	Unclassified	Downregulation
Prupe.4G018800	2.A.108.1.1	The Iron/Lead Transporter (ILT) Family	ILT	LysE Superfamily	Downregulation
Prupe.4G024500	2.A.7.15.3	The Drug/Metabolite Transporter (DMT) Superfamily	DMT	Drug/Metabolite Transporter (DMT) Superfamily	Downregulation
Prupe.4G056600	1.A.10.1.1	The Glutamate-gated Ion Channel (GIC) Family of Neurotransmitter Receptors	GIC	VIC Superfamily	Upregulation
Prupe.4G083700	2.A.2.4.1	The Glycoside-Pentoside-Hexuronide (GPH):Cation Symporter Family	GPH	Major Facilitator (MFS) Superfamily	Downregulation
Prupe.4G093100	9.B.87.1.1	The Selenoprotein P Receptor (SelP-Receptor) Family	SelP Receptor	Ankyrin Repeat Domain-containing (Ank) Superfamily	Downregulation
Prupe.4G093300	9.B.87.1.1	The Selenoprotein P Receptor (SelP-Receptor) Family	SelP Receptor	Ankyrin Repeat Domain-containing (Ank) Superfamily	Upregulation
Prupe.4G093500	9.B.87.1.1	The Selenoprotein P Receptor (SelP-Receptor) Family	SelP Receptor	Ankyrin Repeat Domain-containing (Ank) Superfamily	Downregulation
Prupe.4G093600	9.B.87.1.1	The Selenoprotein P Receptor (SelP-Receptor) Family	SelP Receptor	Ankyrin Repeat Domain-containing (Ank) Superfamily	Downregulation
Prupe.4G094100	9.B.87.1.1	The Selenoprotein P Receptor (SelP-Receptor) Family	SelP Receptor	Ankyrin Repeat Domain-containing (Ank) Superfamily	Upregulation
Prupe.4G104500	3.A.18.1.1	The Nuclear mRNA Exporter (mRNA-E) Family	Unclassified	Unclassified	Downregulation
Prupe.4G109500	1.A.1.2.2	The Voltage-gated Ion Channel (VIC) Superfamily	VIC	VIC Superfamily	Downregulation
Prupe.4G120100	3.A.18.1.1	The Nuclear mRNA Exporter (mRNA-E) Family	Unclassified	Unclassified	Downregulation
Prupe.4G123000	3.A.18.1.1	The Nuclear mRNA Exporter (mRNA-E) Family	Unclassified	Unclassified	Upregulation
Prupe.4G131600	3.A.18.1.1	The Nuclear mRNA Exporter (mRNA-E) Family	Unclassified	Unclassified	Upregulation
Prupe.4G131900	2.A.108.1.1	The Iron/Lead Transporter (ILT) Family	ILT	LysE Superfamily	Downregulation
Prupe.4G145300	1.A.1.4.1	The Voltage-gated Ion Channel (VIC) Superfamily	VIC	VIC Superfamily	Upregulation
Prupe.4G146000	1.A.12.2.1	The Intracellular Chloride Channel (CLIC) Family	Unclassified	Unclassified	Downregulation
Prupe.4G146100	1.A.12.2.1	The Intracellular Chloride Channel (CLIC) Family	Unclassified	Unclassified	Downregulation
Prupe.4G146200	1.A.12.2.1	The Intracellular Chloride Channel (CLIC) Family	Unclassified	Unclassified	Downregulation
Prupe.4G146400	1.A.12.2.1	The Intracellular Chloride Channel (CLIC) Family	Unclassified	Unclassified	Downregulation
Prupe.4G146800	1.A.12.2.1	The Intracellular Chloride Channel (CLIC) Family	Unclassified	Unclassified	Upregulation
Prupe.4G147000	1.A.12.2.1	The Intracellular Chloride Channel (CLIC) Family	Unclassified	Unclassified	Upregulation
Prupe.4G147100	1.A.12.2.1	The Intracellular Chloride Channel (CLIC) Family	Unclassified	Unclassified	Upregulation
Prupe.4G147200	1.A.12.2.1	The Intracellular Chloride Channel (CLIC) Family	Unclassified	Unclassified	Upregulation
Prupe.4G147300	1.A.12.2.1	The Intracellular Chloride Channel (CLIC) Family	Unclassified	Unclassified	Upregulation
Prupe.4G152200	8.A.30.1.1	The Nedd4-Family Interacting Protein-2 (Nedd4) Family	Nedd4	Synaptotagmin Domain-containing (SynapD) Superfamily	Downregulation
Prupe.4G163500	3.A.18.1.1	The Nuclear mRNA Exporter (mRNA-E) Family	Unclassified	Unclassified	Upregulation
Prupe.4G171700	1.A.10.1.1	The Glutamate-gated Ion Channel (GIC) Family of Neurotransmitter Receptors	GIC	VIC Superfamily	Upregulation
Prupe.4G171800	1.A.10.1.1	The Glutamate-gated Ion Channel (GIC) Family of Neurotransmitter Receptors	GIC	VIC Superfamily	Upregulation
Prupe.4G178700	2.A.66.1.1	The Multidrug/Oligosaccharidyl-lipid/Polysaccharide (MOP) Flippase Superfamily	MOP	Multidrug/Oligosaccharidyl-lipid/Polysaccharide Flippase (MOP) Superfamily	Downregulation
Prupe.4G185300	2.A.49.2.1	The Chloride Carrier/Channel (ClC) Family	Unclassified	Unclassified	Downregulation
Prupe.4G186700	3.A.1.208.17	The ATP-binding Cassette (ABC) Superfamily	ABC	ABC1, ABC2, ABC3 Superfamilies	Downregulation
Prupe.4G191200	1.A.1.4.1	The Voltage-gated Ion Channel (VIC) Superfamily	VIC	VIC Superfamily	Downregulation
Prupe.4G206000	9.B.64.1.1	The Putative Cholesterol Transporter (Start1) Family	Unclassified	Unclassified	Downregulation
Prupe.4G216300	1.B.12.5.9	The Autotransporter-1 (AT-1) Family	AT-1	Outer Membrane Pore-forming Protein I (OMPP-I) Superfamily	Downregulation
Prupe.4G232400	3.A.18.1.1	The Nuclear mRNA Exporter (mRNA-E) Family	Unclassified	Unclassified	Upregulation
Prupe.4G233600	3.A.18.1.1	The Nuclear mRNA Exporter (mRNA-E) Family	Unclassified	Unclassified	Upregulation
Prupe.4G234200	3.A.18.1.1	The Nuclear mRNA Exporter (mRNA-E) Family	Unclassified	Unclassified	Upregulation
Prupe.4G234300	5.A.1.1.1	The Disulfide Bond Oxidoreductase D (DsbD) Family	DsbD	LysE Superfamily	Upregulation
Prupe.4G244400	2.A.29.1.1	The Mitochondrial Carrier (MC) Family	MC	Mitochondrial Carrier (MC) Superfamily	Downregulation
Prupe.4G283500	2.A.36.1.1	The Monovalent Cation:Proton Antiporter-1 (CPA1) Family	CPA1	CPA Superfamily	Upregulation
Prupe.5G004300	2.A.69.3.3	The Auxin Efflux Carrier (AEC) Family	AEC	BART Superfamily	Downregulation
Prupe.5G004800	3.D.1.6.3	The H<sup>+</sup> or Na<sup>+</sup>-translocating NADH Dehydrogenase (NDH) Family	NDH	Iron-Sulfur Protein (ISP) Superfamily	Downregulation
Prupe.5G073600	2.A.17.1.1	The Proton-dependent Oligopeptide Transporter (POT/PTR) Family	POT/PTR	Major Facilitator (MFS) Superfamily	Downregulation
Prupe.5G097900	3.A.3.1.1	The P-type ATPase (P-ATPase) Superfamily	P-ATPase	P-type ATPase (P-ATPase) Superfamily	Downregulation
Prupe.5G112700	3.A.1.208.17	The ATP-binding Cassette (ABC) Superfamily	ABC	ABC1, ABC2, ABC3 Superfamilies	Downregulation
Prupe.5G148500	3.A.3.5.1	The P-type ATPase (P-ATPase) Superfamily	P-ATPase	P-type ATPase (P-ATPase) Superfamily	Downregulation
Prupe.5G229600	3.A.1.208.17	The ATP-binding Cassette (ABC) Superfamily	ABC	ABC1, ABC2, ABC3 Superfamilies	Downregulation
Prupe.5G236500	2.A.72.1.1	The K<sup>+</sup> Uptake Permease (KUP) Family	KUP	APC Superfamily	Downregulation
Prupe.5G237200	1.C.4.5.1	The Aerolysin Channel-forming Toxin (Aerolysin) Family	Aerolysin	Aerolysin Superfamily	Downregulation
Prupe.6G005500	3.A.2.2.3	The H<sup>+</sup>- or Na<sup>+</sup>-translocating F-type, V-type and A-type ATPase (F-ATPase) Superfamily	Unclassified	Unclassified	Upregulation
Prupe.6G007500	3.A.3.5.1	The P-type ATPase (P-ATPase) Superfamily	P-ATPase	P-type ATPase (P-ATPase) Superfamily	Upregulation
Prupe.6G007600	1.A.56.1.1	The Copper Transporter (Ctr) Family	Unclassified	Unclassified	Upregulation
Prupe.6G009700	3.A.18.1.1	The Nuclear mRNA Exporter (mRNA-E) Family	Unclassified	Unclassified	Downregulation
Prupe.6G015500	3.A.18.1.1	The Nuclear mRNA Exporter (mRNA-E) Family	Unclassified	Unclassified	Upregulation
Prupe.6G015600	3.A.18.1.1	The Nuclear mRNA Exporter (mRNA-E) Family	Unclassified	Unclassified	Upregulation
Prupe.6G018300	4.C.1.1.3	The Fatty Acid Transporter (FAT) Family	Unclassified	Unclassified	Downregulation
Prupe.6G018400	8.A.30.1.1	The Nedd4-Family Interacting Protein-2 (Nedd4) Family	Nedd4	Synaptotagmin Domain-containing (SynapD) Superfamily	Downregulation
Prupe.6G026100	2.A.67.1.1	The Oligopeptide Transporter (OPT) Family	Unclassified	Unclassified	Upregulation
Prupe.6G026200	2.A.67.1.1	The Oligopeptide Transporter (OPT) Family	Unclassified	Unclassified	Upregulation
Prupe.6G026300	2.A.67.1.1	The Oligopeptide Transporter (OPT) Family	Unclassified	Unclassified	Upregulation
Prupe.6G030400	3.A.3.5.1	The P-type ATPase (P-ATPase) Superfamily	P-ATPase	P-type ATPase (P-ATPase) Superfamily	Upregulation
Prupe.6G037500	3.A.18.1.1	The Nuclear mRNA Exporter (mRNA-E) Family	Unclassified	Unclassified	Downregulation
Prupe.6G040700	1.A.12.2.1	The Intracellular Chloride Channel (CLIC) Family	Unclassified	Unclassified	Upregulation
Prupe.6G051200	3.D.1.6.3	The H<sup>+</sup> or Na<sup>+</sup>-translocating NADH Dehydrogenase (NDH) Family	NDH	Iron-Sulfur Protein (ISP) Superfamily	Upregulation
Prupe.6G051300	3.D.1.6.3	The H<sup>+</sup> or Na<sup>+</sup>-translocating NADH Dehydrogenase (NDH) Family	NDH	Iron-Sulfur Protein (ISP) Superfamily	Upregulation
Prupe.6G053300	1.I.1.1.1	The Nuclear Pore Complex (NPC) Family	NPC	Ankyrin Repeat Domain-containing (Ank) Superfamily	Downregulation
Prupe.6G061300	2.A.108.1.1	The Iron/Lead Transporter (ILT) Family	ILT	LysE Superfamily	Downregulation
Prupe.6G072100	2.A.108.1.1	The Iron/Lead Transporter (ILT) Family	ILT	LysE Superfamily	Downregulation
Prupe.6G074700	3.A.18.1.1	The Nuclear mRNA Exporter (mRNA-E) Family	Unclassified	Unclassified	Upregulation
Prupe.6G074900	3.A.18.1.1	The Nuclear mRNA Exporter (mRNA-E) Family	Unclassified	Unclassified	Downregulation
Prupe.6G089300	2.A.108.1.1	The Iron/Lead Transporter (ILT) Family	ILT	LysE Superfamily	Downregulation
Prupe.6G091900	2.A.17.1.1	The Proton-dependent Oligopeptide Transporter (POT/PTR) Family	POT/PTR	Major Facilitator (MFS) Superfamily	Downregulation
Prupe.6G094300	8.A.5.1.2	The Voltage-gated K<sup>+</sup> Channel ÃŽÂ²-subunit (KvÃŽÂ²) Family	Unclassified	Unclassified	Downregulation
Prupe.6G126100	3.A.18.1.1	The Nuclear mRNA Exporter (mRNA-E) Family	Unclassified	Unclassified	Upregulation
Prupe.6G144100	2.A.85.2.1	The Aromatic Acid Exporter (ArAE) Family	ArAE	Major Facilitator (MFS) Superfamily	Downregulation
Prupe.6G152900	1.B.12.5.9	The Autotransporter-1 (AT-1) Family	AT-1	Outer Membrane Pore-forming Protein I (OMPP-I) Superfamily	Upregulation
Prupe.6G179300	3.A.3.5.1	The P-type ATPase (P-ATPase) Superfamily	P-ATPase	P-type ATPase (P-ATPase) Superfamily	Downregulation
Prupe.6G179500	2.A.108.1.1	The Iron/Lead Transporter (ILT) Family	ILT	LysE Superfamily	Downregulation
Prupe.6G182600	1.A.5.1.1	The Polycystin Cation Channel (PCC) Family	PCC	Leucine-rich Repeat-containing Domain (LRRD) Superfamily	Downregulation
Prupe.6G182700	3.A.8.1.1	The Mitochondrial Protein Translocase (MPT) Family	MPT	Outer Membrane Pore-forming Protein IV (OMPP-IV) Superfamily	Upregulation
Prupe.6G197500	3.A.18.1.1	The Nuclear mRNA Exporter (mRNA-E) Family	Unclassified	Unclassified	Upregulation
Prupe.6G224600	1.B.12.5.1	The Autotransporter-1 (AT-1) Family	AT-1	Outer Membrane Pore-forming Protein I (OMPP-I) Superfamily	Downregulation
Prupe.6G234500	3.A.1.208.17	The ATP-binding Cassette (ABC) Superfamily	ABC	ABC1, ABC2, ABC3 Superfamilies	Upregulation
Prupe.6G249400	1.C.67.1.1	The SphH Hemolysin (SphH) Family	Unclassified	Unclassified	Upregulation
Prupe.6G249600	2.A.7.3.6	The Drug/Metabolite Transporter (DMT) Superfamily	DMT	Drug/Metabolite Transporter (DMT) Superfamily	Upregulation
Prupe.6G258000	2.A.108.1.1	The Iron/Lead Transporter (ILT) Family	ILT	LysE Superfamily	Downregulation
Prupe.6G271500	2.A.108.1.1	The Iron/Lead Transporter (ILT) Family	ILT	LysE Superfamily	Downregulation
Prupe.6G272500	2.A.17.1.1	The Proton-dependent Oligopeptide Transporter (POT/PTR) Family	POT/PTR	Major Facilitator (MFS) Superfamily	Downregulation
Prupe.6G272600	2.A.17.1.1	The Proton-dependent Oligopeptide Transporter (POT/PTR) Family	POT/PTR	Major Facilitator (MFS) Superfamily	Downregulation
Prupe.6G281000	3.A.18.1.1	The Nuclear mRNA Exporter (mRNA-E) Family	Unclassified	Unclassified	Downregulation
Prupe.6G281100	3.A.18.1.1	The Nuclear mRNA Exporter (mRNA-E) Family	Unclassified	Unclassified	Upregulation
Prupe.6G286200	2.A.100.1.4	The Ferroportin (Fpn) Family	Fpn	Major Facilitator (MFS) Superfamily	Downregulation
Prupe.6G293000	1.C.66.1.1	The Puroindoline (Puroindoline) Family	Unclassified	Unclassified	Downregulation
Prupe.6G324100	1.A.5.1.1	The Polycystin Cation Channel (PCC) Family	PCC	Leucine-rich Repeat-containing Domain (LRRD) Superfamily	Upregulation
Prupe.6G324200	1.A.5.1.1	The Polycystin Cation Channel (PCC) Family	PCC	Leucine-rich Repeat-containing Domain (LRRD) Superfamily	Upregulation
Prupe.6G329100	3.A.3.5.1	The P-type ATPase (P-ATPase) Superfamily	P-ATPase	P-type ATPase (P-ATPase) Superfamily	Downregulation
Prupe.6G333400	8.A.30.1.1	The Nedd4-Family Interacting Protein-2 (Nedd4) Family	Nedd4	Synaptotagmin Domain-containing (SynapD) Superfamily	Upregulation
Prupe.6G342100	8.A.5.1.2	The Voltage-gated K<sup>+</sup> Channel ÃŽÂ²-subunit (KvÃŽÂ²) Family	Unclassified	Unclassified	Upregulation
Prupe.6G354100	1.B.12.5.9	The Autotransporter-1 (AT-1) Family	AT-1	Outer Membrane Pore-forming Protein I (OMPP-I) Superfamily	Downregulation
Prupe.7G032900	3.A.18.1.1	The Nuclear mRNA Exporter (mRNA-E) Family	Unclassified	Unclassified	Upregulation
Prupe.7G059200	3.A.18.1.1	The Nuclear mRNA Exporter (mRNA-E) Family	Unclassified	Unclassified	Upregulation
Prupe.7G066100	2.A.66.1.1	The Multidrug/Oligosaccharidyl-lipid/Polysaccharide (MOP) Flippase Superfamily	MOP	Multidrug/Oligosaccharidyl-lipid/Polysaccharide Flippase (MOP) Superfamily	Upregulation
Prupe.7G093400	1.F.1.1.1	The Synaptosomal Vesicle Fusion Pore (SVF-Pore) Family	SVF-Pore	AAA-ATPase Superfamily	Upregulation
Prupe.7G106500	1.A.33.1.1	The Cation Channel-forming Heat Shock Protein-70 (Hsp70) Family	Unclassified	Unclassified	Upregulation
Prupe.7G106900	1.A.10.1.1	The Glutamate-gated Ion Channel (GIC) Family of Neurotransmitter Receptors	GIC	VIC Superfamily	Downregulation
Prupe.7G108100	1.A.33.1.1	The Cation Channel-forming Heat Shock Protein-70 (Hsp70) Family	Unclassified	Unclassified	Downregulation
Prupe.7G109100	1.A.12.1.5	The Intracellular Chloride Channel (CLIC) Family	Unclassified	Unclassified	Downregulation
Prupe.7G113800	3.A.3.2.29	The P-type ATPase (P-ATPase) Superfamily	P-ATPase	P-type ATPase (P-ATPase) Superfamily	Upregulation
Prupe.7G114000	1.B.12.5.9	The Autotransporter-1 (AT-1) Family	AT-1	Outer Membrane Pore-forming Protein I (OMPP-I) Superfamily	Downregulation
Prupe.7G119400	3.A.8.1.1	The Mitochondrial Protein Translocase (MPT) Family	MPT	Outer Membrane Pore-forming Protein IV (OMPP-IV) Superfamily	Upregulation
Prupe.7G119500	3.A.8.1.1	The Mitochondrial Protein Translocase (MPT) Family	MPT	Outer Membrane Pore-forming Protein IV (OMPP-IV) Superfamily	Upregulation
Prupe.7G140500	2.A.108.1.1	The Iron/Lead Transporter (ILT) Family	ILT	LysE Superfamily	Downregulation
Prupe.7G156500	2.A.108.1.1	The Iron/Lead Transporter (ILT) Family	ILT	LysE Superfamily	Downregulation
Prupe.7G162300	1.C.57.3.4	The Clostridial Cytotoxin (CCT) Family	CCT	RTX-toxin Superfamily	Upregulation
Prupe.7G163200	5.A.1.1.1	The Disulfide Bond Oxidoreductase D (DsbD) Family	DsbD	LysE Superfamily	Downregulation
Prupe.7G178600	4.C.1.1.3	The Fatty Acid Transporter (FAT) Family	Unclassified	Unclassified	Upregulation
Prupe.7G185200	2.A.69.3.3	The Auxin Efflux Carrier (AEC) Family	AEC	BART Superfamily	Downregulation
Prupe.7G197100	1.B.12.5.1	The Autotransporter-1 (AT-1) Family	AT-1	Outer Membrane Pore-forming Protein I (OMPP-I) Superfamily	Downregulation
Prupe.7G202700	1.A.23.1.1	The Small Conductance Mechanosensitive Ion Channel (MscS) Family	Unclassified	Unclassified	Downregulation
Prupe.7G218600	2.A.66.1.1	The Multidrug/Oligosaccharidyl-lipid/Polysaccharide (MOP) Flippase Superfamily	MOP	Multidrug/Oligosaccharidyl-lipid/Polysaccharide Flippase (MOP) Superfamily	Downregulation
Prupe.7G231600	2.A.2.4.1	The Glycoside-Pentoside-Hexuronide (GPH):Cation Symporter Family	GPH	Major Facilitator (MFS) Superfamily	Downregulation
Prupe.7G243500	2.A.47.2.1	The Divalent Anion:Na<sup>+</sup> Symporter (DASS) Family	DASS	IT Superfamily	Downregulation
Prupe.7G243800	8.A.30.1.1	The Nedd4-Family Interacting Protein-2 (Nedd4) Family	Nedd4	Synaptotagmin Domain-containing (SynapD) Superfamily	Upregulation
Prupe.8G001900	2.A.17.1.1	The Proton-dependent Oligopeptide Transporter (POT/PTR) Family	POT/PTR	Major Facilitator (MFS) Superfamily	Downregulation
Prupe.8G008400	3.D.1.6.1	The H<sup>+</sup> or Na<sup>+</sup>-translocating NADH Dehydrogenase (NDH) Family	NDH	Iron-Sulfur Protein (ISP) Superfamily	Upregulation
Prupe.8G008800	3.D.1.6.1	The H<sup>+</sup> or Na<sup>+</sup>-translocating NADH Dehydrogenase (NDH) Family	NDH	Iron-Sulfur Protein (ISP) Superfamily	Upregulation
Prupe.8G017400	2.A.123.1.11	The Sweet; PQ-loop; Saliva; MtN3 (Sweet) Family	Sweet	Transporter-Opsin-G protein-coupled receptor (TOG) Superfamily	Downregulation
Prupe.8G022000	3.A.18.1.1	The Nuclear mRNA Exporter (mRNA-E) Family	Unclassified	Unclassified	Downregulation
Prupe.8G046800	2.A.108.1.1	The Iron/Lead Transporter (ILT) Family	ILT	LysE Superfamily	Downregulation
Prupe.8G047500	2.A.108.1.1	The Iron/Lead Transporter (ILT) Family	ILT	LysE Superfamily	Downregulation
Prupe.8G047900	2.A.108.1.1	The Iron/Lead Transporter (ILT) Family	ILT	LysE Superfamily	Downregulation
Prupe.8G092600	3.A.16.1.2	The Endoplasmic Reticular Retrotranslocon (ER-RT) Family	ER-RT	AAA-ATPase Superfamily	Upregulation
Prupe.8G095400	2.A.108.1.1	The Iron/Lead Transporter (ILT) Family	ILT	LysE Superfamily	Downregulation
Prupe.8G096000	1.C.57.3.4	The Clostridial Cytotoxin (CCT) Family	CCT	RTX-toxin Superfamily	Upregulation
Prupe.8G097000	2.A.108.1.1	The Iron/Lead Transporter (ILT) Family	ILT	LysE Superfamily	Downregulation
Prupe.8G097600	1.A.1.2.2	The Voltage-gated Ion Channel (VIC) Superfamily	VIC	VIC Superfamily	Downregulation
Prupe.8G100700	2.A.2.4.1	The Glycoside-Pentoside-Hexuronide (GPH):Cation Symporter Family	GPH	Major Facilitator (MFS) Superfamily	Upregulation
Prupe.8G100900	2.A.2.4.1	The Glycoside-Pentoside-Hexuronide (GPH):Cation Symporter Family	GPH	Major Facilitator (MFS) Superfamily	Upregulation
Prupe.8G103900	3.A.11.1.1	The Bacterial Competence-related DNA Transformation Transporter (DNA-T) Family	Unclassified	Unclassified	Downregulation
Prupe.8G104500	3.A.11.1.1	The Bacterial Competence-related DNA Transformation Transporter (DNA-T) Family	Unclassified	Unclassified	Downregulation
Prupe.8G146600	2.A.40.1.1	The Nucleobase/Ascorbate Transporter (NAT) or Nucleobase:Cation Symporter-2 (NCS2) Family	NAT/NCS2	APC Superfamily	Downregulation
Prupe.8G159000	1.A.8.1.1	The Major Intrinsic Protein (MIP) Family	MIP	Major Intrinsic Protein (MIP) Superfamily	Downregulation
Prupe.8G167600	3.A.18.1.1	The Nuclear mRNA Exporter (mRNA-E) Family	Unclassified	Unclassified	Downregulation
Prupe.8G184000	2.A.7.15.3	The Drug/Metabolite Transporter (DMT) Superfamily	DMT	Drug/Metabolite Transporter (DMT) Superfamily	Downregulation
Prupe.8G202000	3.A.11.1.1	The Bacterial Competence-related DNA Transformation Transporter (DNA-T) Family	Unclassified	Unclassified	Downregulation
Prupe.8G209600	1.B.12.5.9	The Autotransporter-1 (AT-1) Family	AT-1	Outer Membrane Pore-forming Protein I (OMPP-I) Superfamily	Downregulation
Prupe.8G210300	1.A.12.2.1	The Intracellular Chloride Channel (CLIC) Family	Unclassified	Unclassified	Upregulation
Prupe.8G210400	1.A.12.2.1	The Intracellular Chloride Channel (CLIC) Family	Unclassified	Unclassified	Upregulation
Prupe.8G210500	1.A.12.2.1	The Intracellular Chloride Channel (CLIC) Family	Unclassified	Unclassified	Upregulation
Prupe.8G242400	2.A.85.2.1	The Aromatic Acid Exporter (ArAE) Family	ArAE	Major Facilitator (MFS) Superfamily	Upregulation
Prupe.8G248500	2.A.2.4.1	The Glycoside-Pentoside-Hexuronide (GPH):Cation Symporter Family	GPH	Major Facilitator (MFS) Superfamily	Downregulation
Prupe.8G248700	2.A.2.4.1	The Glycoside-Pentoside-Hexuronide (GPH):Cation Symporter Family	GPH	Major Facilitator (MFS) Superfamily	Downregulation
Prupe.8G254300	1.A.12.1.5	The Intracellular Chloride Channel (CLIC) Family	Unclassified	Unclassified	Upregulation
Prupe.8G256700	2.A.49.6.1	The Chloride Carrier/Channel (ClC) Family	Unclassified	Unclassified	Downregulation
Prupe.I000500	3.A.1.208.17	The ATP-binding Cassette (ABC) Superfamily	ABC	ABC1, ABC2, ABC3 Superfamilies	Upregulation
Prupe.I000700	3.A.1.208.17	The ATP-binding Cassette (ABC) Superfamily	ABC	ABC1, ABC2, ABC3 Superfamilies	Upregulation
Prupe.I003100	2.A.6.6.4	The Resistance-Nodulation-Cell Division (RND) Superfamily	RND	Resistance-Nodulation-Cell Division (RND) Superfamily	Upregulation
Prupe.I005400	2.A.66.1.1	The Multidrug/Oligosaccharidyl-lipid/Polysaccharide (MOP) Flippase Superfamily	MOP	Multidrug/Oligosaccharidyl-lipid/Polysaccharide Flippase (MOP) Superfamily	Downregulation

## Sheet: CNRvsCRR
Gene ID	TCDB code	TCDB family	Family Symbol	Superfamily	Regulation
Prupe.1G134400	2.A.6.6.4	The Resistance-Nodulation-Cell Division (RND) Superfamily	RND	Resistance-Nodulation-Cell Division (RND) Superfamily	Downregulation
Prupe.1G137600	3.A.3.5.1	The P-type ATPase (P-ATPase) Superfamily	P-ATPase	P-type ATPase (P-ATPase) Superfamily	Upregulation
Prupe.1G175700	8.A.5.1.2	The Voltage-gated K<sup>+</sup> Channel ÃŽÂ²-subunit (KvÃŽÂ²) Family	Unclassified	Unclassified	Downregulation
Prupe.1G201100	3.A.18.1.1	The Nuclear mRNA Exporter (mRNA-E) Family	Unclassified	Unclassified	Downregulation
Prupe.1G209400	2.A.36.1.1	The Monovalent Cation:Proton Antiporter-1 (CPA1) Family	CPA1	CPA Superfamily	Downregulation
Prupe.1G244700	8.A.5.1.2	The Voltage-gated K<sup>+</sup> Channel ÃŽÂ²-subunit (KvÃŽÂ²) Family	Unclassified	Unclassified	Downregulation
Prupe.1G244900	3.A.18.1.1	The Nuclear mRNA Exporter (mRNA-E) Family	Unclassified	Unclassified	Downregulation
Prupe.1G257500	2.A.7.3.6	The Drug/Metabolite Transporter (DMT) Superfamily	DMT	Drug/Metabolite Transporter (DMT) Superfamily	Downregulation
Prupe.1G278800	2.A.47.2.1	The Divalent Anion:Na<sup>+</sup> Symporter (DASS) Family	DASS	IT Superfamily	Downregulation
Prupe.1G324300	3.A.8.1.1	The Mitochondrial Protein Translocase (MPT) Family	MPT	Outer Membrane Pore-forming Protein IV (OMPP-IV) Superfamily	Upregulation
Prupe.1G341500	1.C.45.1.1	The Plant Defensin (Plant Defensin) Family	PD	Defensin Superfamily	Upregulation
Prupe.1G341600	1.C.45.1.1	The Plant Defensin (Plant Defensin) Family	PD	Defensin Superfamily	Upregulation
Prupe.1G343300	3.A.18.1.1	The Nuclear mRNA Exporter (mRNA-E) Family	Unclassified	Unclassified	Upregulation
Prupe.1G346300	2.A.36.1.1	The Monovalent Cation:Proton Antiporter-1 (CPA1) Family	CPA1	CPA Superfamily	Downregulation
Prupe.1G368500	3.A.11.1.1	The Bacterial Competence-related DNA Transformation Transporter (DNA-T) Family	Unclassified	Unclassified	Upregulation
Prupe.1G373000	5.A.1.1.1	The Disulfide Bond Oxidoreductase D (DsbD) Family	DsbD	LysE Superfamily	Downregulation
Prupe.1G373100	5.A.1.1.1	The Disulfide Bond Oxidoreductase D (DsbD) Family	DsbD	LysE Superfamily	Downregulation
Prupe.1G386600	2.A.6.6.4	The Resistance-Nodulation-Cell Division (RND) Superfamily	RND	Resistance-Nodulation-Cell Division (RND) Superfamily	Downregulation
Prupe.1G397100	3.E.2.1.1	The Photosynthetic Reaction Center (PRC) Family	Unclassified	Unclassified	Upregulation
Prupe.1G397200	3.E.2.1.1	The Photosynthetic Reaction Center (PRC) Family	Unclassified	Unclassified	Upregulation
Prupe.1G400000	1.A.10.1.1	The Glutamate-gated Ion Channel (GIC) Family of Neurotransmitter Receptors	GIC	VIC Superfamily	Upregulation
Prupe.1G400300	1.A.10.1.1	The Glutamate-gated Ion Channel (GIC) Family of Neurotransmitter Receptors	GIC	VIC Superfamily	Upregulation
Prupe.1G400400	1.A.10.1.1	The Glutamate-gated Ion Channel (GIC) Family of Neurotransmitter Receptors	GIC	VIC Superfamily	Downregulation
Prupe.1G410500	1.A.12.1.5	The Intracellular Chloride Channel (CLIC) Family	Unclassified	Unclassified	Downregulation
Prupe.1G422500	3.A.18.1.1	The Nuclear mRNA Exporter (mRNA-E) Family	Unclassified	Unclassified	Upregulation
Prupe.1G425500	1.B.12.5.1	The Autotransporter-1 (AT-1) Family	AT-1	Outer Membrane Pore-forming Protein I (OMPP-I) Superfamily	Upregulation
Prupe.1G425600	1.B.12.5.1	The Autotransporter-1 (AT-1) Family	AT-1	Outer Membrane Pore-forming Protein I (OMPP-I) Superfamily	Downregulation
Prupe.1G444900	2.A.18.6.8	The Amino Acid/Auxin Permease (AAAP) Family	AAAP	APC Superfamily	Downregulation
Prupe.1G449400	2.A.6.6.4	The Resistance-Nodulation-Cell Division (RND) Superfamily	RND	Resistance-Nodulation-Cell Division (RND) Superfamily	Upregulation
Prupe.1G449500	1.A.8.1.1	The Major Intrinsic Protein (MIP) Family	MIP	Major Intrinsic Protein (MIP) Superfamily	Upregulation
Prupe.1G471300	3.A.1.208.17	The ATP-binding Cassette (ABC) Superfamily	ABC	ABC1, ABC2, ABC3 Superfamilies	Downregulation
Prupe.1G476800	3.A.18.1.1	The Nuclear mRNA Exporter (mRNA-E) Family	Unclassified	Unclassified	Downregulation
Prupe.1G483200	2.A.66.6.2	The Multidrug/Oligosaccharidyl-lipid/Polysaccharide (MOP) Flippase Superfamily	MOP	Multidrug/Oligosaccharidyl-lipid/Polysaccharide Flippase (MOP) Superfamily	Downregulation
Prupe.1G492500	2.A.55.1.1	The Metal Ion (Mn<sup>2+</sup>-iron) Transporter (Nramp) Family	Nramp	APC Superfamily	Downregulation
Prupe.1G497700	1.B.12.5.9	The Autotransporter-1 (AT-1) Family	AT-1	Outer Membrane Pore-forming Protein I (OMPP-I) Superfamily	Downregulation
Prupe.1G497800	1.B.12.5.9	The Autotransporter-1 (AT-1) Family	AT-1	Outer Membrane Pore-forming Protein I (OMPP-I) Superfamily	Downregulation
Prupe.1G500600	2.A.7.3.6	The Drug/Metabolite Transporter (DMT) Superfamily	DMT	Drug/Metabolite Transporter (DMT) Superfamily	Upregulation
Prupe.1G510800	3.A.18.1.1	The Nuclear mRNA Exporter (mRNA-E) Family	Unclassified	Unclassified	Upregulation
Prupe.1G523200	3.A.3.5.1	The P-type ATPase (P-ATPase) Superfamily	P-ATPase	P-type ATPase (P-ATPase) Superfamily	Downregulation
Prupe.1G558200	3.A.8.1.1	The Mitochondrial Protein Translocase (MPT) Family	MPT	Outer Membrane Pore-forming Protein IV (OMPP-IV) Superfamily	Upregulation
Prupe.1G558300	2.A.53.1.1	The Sulfate Permease (SulP) Family	SulP	APC Superfamily	Upregulation
Prupe.1G587500	3.D.1.6.3	The H<sup>+</sup> or Na<sup>+</sup>-translocating NADH Dehydrogenase (NDH) Family	NDH	Iron-Sulfur Protein (ISP) Superfamily	Downregulation
Prupe.2G005500	1.A.5.1.1	The Polycystin Cation Channel (PCC) Family	PCC	Leucine-rich Repeat-containing Domain (LRRD) Superfamily	Downregulation
Prupe.2G020700	3.D.1.6.3	The H<sup>+</sup> or Na<sup>+</sup>-translocating NADH Dehydrogenase (NDH) Family	NDH	Iron-Sulfur Protein (ISP) Superfamily	Downregulation
Prupe.2G024100	2.A.2.4.1	The Glycoside-Pentoside-Hexuronide (GPH):Cation Symporter Family	GPH	Major Facilitator (MFS) Superfamily	Downregulation
Prupe.2G050800	8.A.5.1.2	The Voltage-gated K<sup>+</sup> Channel ÃŽÂ²-subunit (KvÃŽÂ²) Family	Unclassified	Unclassified	Downregulation
Prupe.2G057600	3.A.18.1.1	The Nuclear mRNA Exporter (mRNA-E) Family	Unclassified	Unclassified	Downregulation
Prupe.2G076700	3.A.18.1.1	The Nuclear mRNA Exporter (mRNA-E) Family	Unclassified	Unclassified	Downregulation
Prupe.2G077400	3.A.18.1.1	The Nuclear mRNA Exporter (mRNA-E) Family	Unclassified	Unclassified	Downregulation
Prupe.2G077700	3.A.18.1.1	The Nuclear mRNA Exporter (mRNA-E) Family	Unclassified	Unclassified	Downregulation
Prupe.2G077800	2.A.108.1.1	The Iron/Lead Transporter (ILT) Family	ILT	LysE Superfamily	Downregulation
Prupe.2G080400	3.A.18.1.1	The Nuclear mRNA Exporter (mRNA-E) Family	Unclassified	Unclassified	Downregulation
Prupe.2G084300	3.A.1.208.17	The ATP-binding Cassette (ABC) Superfamily	ABC	ABC1, ABC2, ABC3 Superfamilies	Downregulation
Prupe.2G097700	1.C.4.1.1	The Aerolysin Channel-forming Toxin (Aerolysin) Family	Aerolysin	Aerolysin Superfamily	Upregulation
Prupe.2G105200	1.A.10.1.3	The Glutamate-gated Ion Channel (GIC) Family of Neurotransmitter Receptors	GIC	VIC Superfamily	Downregulation
Prupe.2G116200	3.A.18.1.1	The Nuclear mRNA Exporter (mRNA-E) Family	Unclassified	Unclassified	Upregulation
Prupe.2G130500	3.A.18.1.1	The Nuclear mRNA Exporter (mRNA-E) Family	Unclassified	Unclassified	Downregulation
Prupe.2G153500	2.A.94.1.1	The Phosphate Permease (Pho1) Family	Pho1	IT Superfamily	Downregulation
Prupe.2G234200	1.A.33.1.1	The Cation Channel-forming Heat Shock Protein-70 (Hsp70) Family	Unclassified	Unclassified	Downregulation
Prupe.2G234400	1.A.33.1.1	The Cation Channel-forming Heat Shock Protein-70 (Hsp70) Family	Unclassified	Unclassified	Downregulation
Prupe.2G238800	3.A.16.1.2	The Endoplasmic Reticular Retrotranslocon (ER-RT) Family	ER-RT	AAA-ATPase Superfamily	Upregulation
Prupe.2G303800	1.F.1.1.1	The Synaptosomal Vesicle Fusion Pore (SVF-Pore) Family	SVF-Pore	AAA-ATPase Superfamily	Downregulation
Prupe.2G305600	3.A.1.208.17	The ATP-binding Cassette (ABC) Superfamily	ABC	ABC1, ABC2, ABC3 Superfamilies	Downregulation
Prupe.3G009400	1.A.8.1.1	The Major Intrinsic Protein (MIP) Family	MIP	Major Intrinsic Protein (MIP) Superfamily	Upregulation
Prupe.3G024600	3.A.18.1.1	The Nuclear mRNA Exporter (mRNA-E) Family	Unclassified	Unclassified	Upregulation
Prupe.3G025400	2.A.49.6.1	The Chloride Carrier/Channel (ClC) Family	Unclassified	Unclassified	Downregulation
Prupe.3G032900	1.B.12.5.9	The Autotransporter-1 (AT-1) Family	AT-1	Outer Membrane Pore-forming Protein I (OMPP-I) Superfamily	Upregulation
Prupe.3G033500	1.B.12.5.9	The Autotransporter-1 (AT-1) Family	AT-1	Outer Membrane Pore-forming Protein I (OMPP-I) Superfamily	Downregulation
Prupe.3G033600	1.B.12.5.9	The Autotransporter-1 (AT-1) Family	AT-1	Outer Membrane Pore-forming Protein I (OMPP-I) Superfamily	Downregulation
Prupe.3G040500	8.A.30.1.1	The Nedd4-Family Interacting Protein-2 (Nedd4) Family	Nedd4	Synaptotagmin Domain-containing (SynapD) Superfamily	Upregulation
Prupe.3G041400	8.A.30.1.1	The Nedd4-Family Interacting Protein-2 (Nedd4) Family	Nedd4	Synaptotagmin Domain-containing (SynapD) Superfamily	Upregulation
Prupe.3G059800	3.A.1.208.17	The ATP-binding Cassette (ABC) Superfamily	ABC	ABC1, ABC2, ABC3 Superfamilies	Downregulation
Prupe.3G060000	3.A.1.208.17	The ATP-binding Cassette (ABC) Superfamily	ABC	ABC1, ABC2, ABC3 Superfamilies	Downregulation
Prupe.3G062300	1.A.1.4.1	The Voltage-gated Ion Channel (VIC) Superfamily	VIC	VIC Superfamily	Upregulation
Prupe.3G065300	1.A.1.4.1	The Voltage-gated Ion Channel (VIC) Superfamily	VIC	VIC Superfamily	Downregulation
Prupe.3G066900	2.A.2.4.1	The Glycoside-Pentoside-Hexuronide (GPH):Cation Symporter Family	GPH	Major Facilitator (MFS) Superfamily	Upregulation
Prupe.3G068400	2.A.102.1.1	The 4-Toluene Sulfonate Uptake Permease (TSUP) Family	TSUP	Transporter-Opsin-G protein-coupled receptor (TOG) Superfamily	Downregulation
Prupe.3G071100	2.A.2.4.1	The Glycoside-Pentoside-Hexuronide (GPH):Cation Symporter Family	GPH	Major Facilitator (MFS) Superfamily	Downregulation
Prupe.3G072200	2.A.6.6.4	The Resistance-Nodulation-Cell Division (RND) Superfamily	RND	Resistance-Nodulation-Cell Division (RND) Superfamily	Downregulation
Prupe.3G076600	3.A.1.205.7	The ATP-binding Cassette (ABC) Superfamily	ABC	ABC1, ABC2, ABC3 Superfamilies	Downregulation
Prupe.3G077900	2.A.31.1.1	The Anion Exchanger (AE) Family	AE	APC Superfamily	Downregulation
Prupe.3G149800	2.A.66.1.1	The Multidrug/Oligosaccharidyl-lipid/Polysaccharide (MOP) Flippase Superfamily	MOP	Multidrug/Oligosaccharidyl-lipid/Polysaccharide Flippase (MOP) Superfamily	Downregulation
Prupe.3G153100	1.C.4.5.1	The Aerolysin Channel-forming Toxin (Aerolysin) Family	Aerolysin	Aerolysin Superfamily	Upregulation
Prupe.3G153300	1.C.4.5.1	The Aerolysin Channel-forming Toxin (Aerolysin) Family	Aerolysin	Aerolysin Superfamily	Upregulation
Prupe.3G156500	1.C.57.3.4	The Clostridial Cytotoxin (CCT) Family	CCT	RTX-toxin Superfamily	Downregulation
Prupe.3G177600	1.B.12.5.9	The Autotransporter-1 (AT-1) Family	AT-1	Outer Membrane Pore-forming Protein I (OMPP-I) Superfamily	Downregulation
Prupe.3G191000	1.A.8.1.1	The Major Intrinsic Protein (MIP) Family	MIP	Major Intrinsic Protein (MIP) Superfamily	Downregulation
Prupe.3G273300	3.A.1.208.17	The ATP-binding Cassette (ABC) Superfamily	ABC	ABC1, ABC2, ABC3 Superfamilies	Downregulation
Prupe.4G092800	1.A.1.2.2	The Voltage-gated Ion Channel (VIC) Superfamily	VIC	VIC Superfamily	Downregulation
Prupe.4G093900	2.A.53.1.1	The Sulfate Permease (SulP) Family	SulP	APC Superfamily	Upregulation
Prupe.4G094100	9.B.87.1.1	The Selenoprotein P Receptor (SelP-Receptor) Family	SelP Receptor	Ankyrin Repeat Domain-containing (Ank) Superfamily	Downregulation
Prupe.4G104300	3.A.18.1.1	The Nuclear mRNA Exporter (mRNA-E) Family	Unclassified	Unclassified	Downregulation
Prupe.4G104500	3.A.18.1.1	The Nuclear mRNA Exporter (mRNA-E) Family	Unclassified	Unclassified	Downregulation
Prupe.4G116800	3.A.18.1.1	The Nuclear mRNA Exporter (mRNA-E) Family	Unclassified	Unclassified	Downregulation
Prupe.4G117000	3.A.18.1.1	The Nuclear mRNA Exporter (mRNA-E) Family	Unclassified	Unclassified	Downregulation
Prupe.4G117100	2.A.5.1.1	The Zinc (Zn<sup>2+</sup>)-Iron (Fe<sup>2+</sup>) Permease (ZIP) Family	Unclassified	Unclassified	Downregulation
Prupe.4G146000	1.A.12.2.1	The Intracellular Chloride Channel (CLIC) Family	Unclassified	Unclassified	Downregulation
Prupe.4G146200	1.A.12.2.1	The Intracellular Chloride Channel (CLIC) Family	Unclassified	Unclassified	Downregulation
Prupe.4G241000	2.A.5.1.1	The Zinc (Zn<sup>2+</sup>)-Iron (Fe<sup>2+</sup>) Permease (ZIP) Family	Unclassified	Unclassified	Upregulation
Prupe.4G244400	2.A.29.1.1	The Mitochondrial Carrier (MC) Family	MC	Mitochondrial Carrier (MC) Superfamily	Downregulation
Prupe.4G245900	2.A.1.42.2	The Major Facilitator Superfamily (MFS)	MFS	Major Facilitator (MFS) Superfamily	Upregulation
Prupe.4G246600	3.A.18.1.1	The Nuclear mRNA Exporter (mRNA-E) Family	Unclassified	Unclassified	Downregulation
Prupe.4G254600	3.A.1.208.17	The ATP-binding Cassette (ABC) Superfamily	ABC	ABC1, ABC2, ABC3 Superfamilies	Downregulation
Prupe.4G283500	2.A.36.1.1	The Monovalent Cation:Proton Antiporter-1 (CPA1) Family	CPA1	CPA Superfamily	Upregulation
Prupe.4G284200	1.A.11.3.1	The Ammonium Transporter Channel (Amt) Family	Unclassified	Unclassified	Downregulation
Prupe.4G284700	1.A.11.3.1	The Ammonium Transporter Channel (Amt) Family	Unclassified	Unclassified	Downregulation
Prupe.4G285000	1.A.11.3.1	The Ammonium Transporter Channel (Amt) Family	Unclassified	Unclassified	Downregulation
Prupe.4G285300	1.A.11.3.1	The Ammonium Transporter Channel (Amt) Family	Unclassified	Unclassified	Downregulation
Prupe.4G285400	1.A.11.3.1	The Ammonium Transporter Channel (Amt) Family	Unclassified	Unclassified	Downregulation
Prupe.5G005000	3.D.1.6.3	The H<sup>+</sup> or Na<sup>+</sup>-translocating NADH Dehydrogenase (NDH) Family	NDH	Iron-Sulfur Protein (ISP) Superfamily	Upregulation
Prupe.5G006100	2.A.2.4.1	The Glycoside-Pentoside-Hexuronide (GPH):Cation Symporter Family	GPH	Major Facilitator (MFS) Superfamily	Upregulation
Prupe.5G040200	2.A.85.2.1	The Aromatic Acid Exporter (ArAE) Family	ArAE	Major Facilitator (MFS) Superfamily	Downregulation
Prupe.5G186500	1.B.8.1.1	The Mitochondrial and Plastid Porin (MPP) Family	MPP	Outer Membrane Pore-forming Protein I (OMPP-I) Superfamily	Upregulation
Prupe.5G230200	5.B.1.1.6	The Phagocyte (gp91<sup>phox</sup>) NADPH Oxidase Family	gp91phox	Calmodulin/Calcineurin/KChIP (CaCa) Superfamily	Downregulation
Prupe.6G005500	3.A.2.2.3	The H<sup>+</sup>- or Na<sup>+</sup>-translocating F-type, V-type and A-type ATPase (F-ATPase) Superfamily	Unclassified	Unclassified	Upregulation
Prupe.6G007600	1.A.56.1.1	The Copper Transporter (Ctr) Family	Unclassified	Unclassified	Upregulation
Prupe.6G015600	3.A.18.1.1	The Nuclear mRNA Exporter (mRNA-E) Family	Unclassified	Unclassified	Upregulation
Prupe.6G018700	1.A.5.1.1	The Polycystin Cation Channel (PCC) Family	PCC	Leucine-rich Repeat-containing Domain (LRRD) Superfamily	Upregulation
Prupe.6G026300	2.A.67.1.1	The Oligopeptide Transporter (OPT) Family	Unclassified	Unclassified	Upregulation
Prupe.6G035200	5.B.4.1.1	The Plant Photosystem I Supercomplex (PSI) Family	PSI	Iron-Sulfur Protein (ISP) Superfamily	Upregulation
Prupe.6G051200	3.D.1.6.3	The H<sup>+</sup> or Na<sup>+</sup>-translocating NADH Dehydrogenase (NDH) Family	NDH	Iron-Sulfur Protein (ISP) Superfamily	Upregulation
Prupe.6G051300	3.D.1.6.3	The H<sup>+</sup> or Na<sup>+</sup>-translocating NADH Dehydrogenase (NDH) Family	NDH	Iron-Sulfur Protein (ISP) Superfamily	Upregulation
Prupe.6G060100	2.A.2.2.2	The Glycoside-Pentoside-Hexuronide (GPH):Cation Symporter Family	GPH	Major Facilitator (MFS) Superfamily	Upregulation
Prupe.6G066900	1.A.56.1.1	The Copper Transporter (Ctr) Family	Unclassified	Unclassified	Upregulation
Prupe.6G074700	3.A.18.1.1	The Nuclear mRNA Exporter (mRNA-E) Family	Unclassified	Unclassified	Upregulation
Prupe.6G079800	1.A.33.1.1	The Cation Channel-forming Heat Shock Protein-70 (Hsp70) Family	Unclassified	Unclassified	Upregulation
Prupe.6G080400	2.A.53.3.8	The Sulfate Permease (SulP) Family	SulP	APC Superfamily	Upregulation
Prupe.6G088800	5.B.6.1.1	The Transmembrane Epithelial Antigen Protein-3 Ferric Reductase (STEAP) Family	Unclassified	Unclassified	Downregulation
Prupe.6G091800	2.A.17.1.1	The Proton-dependent Oligopeptide Transporter (POT/PTR) Family	POT/PTR	Major Facilitator (MFS) Superfamily	Downregulation
Prupe.6G091900	2.A.17.1.1	The Proton-dependent Oligopeptide Transporter (POT/PTR) Family	POT/PTR	Major Facilitator (MFS) Superfamily	Downregulation
Prupe.6G151200	2.A.2.4.1	The Glycoside-Pentoside-Hexuronide (GPH):Cation Symporter Family	GPH	Major Facilitator (MFS) Superfamily	Downregulation
Prupe.6G182700	3.A.8.1.1	The Mitochondrial Protein Translocase (MPT) Family	MPT	Outer Membrane Pore-forming Protein IV (OMPP-IV) Superfamily	Upregulation
Prupe.6G186100	8.A.30.1.1	The Nedd4-Family Interacting Protein-2 (Nedd4) Family	Nedd4	Synaptotagmin Domain-containing (SynapD) Superfamily	Upregulation
Prupe.6G191500	3.A.1.208.17	The ATP-binding Cassette (ABC) Superfamily	ABC	ABC1, ABC2, ABC3 Superfamilies	Upregulation
Prupe.6G195500	2.A.66.1.1	The Multidrug/Oligosaccharidyl-lipid/Polysaccharide (MOP) Flippase Superfamily	MOP	Multidrug/Oligosaccharidyl-lipid/Polysaccharide Flippase (MOP) Superfamily	Downregulation
Prupe.6G197500	3.A.18.1.1	The Nuclear mRNA Exporter (mRNA-E) Family	Unclassified	Unclassified	Upregulation
Prupe.6G249600	2.A.7.3.6	The Drug/Metabolite Transporter (DMT) Superfamily	DMT	Drug/Metabolite Transporter (DMT) Superfamily	Upregulation
Prupe.6G272600	2.A.17.1.1	The Proton-dependent Oligopeptide Transporter (POT/PTR) Family	POT/PTR	Major Facilitator (MFS) Superfamily	Downregulation
Prupe.6G281100	3.A.18.1.1	The Nuclear mRNA Exporter (mRNA-E) Family	Unclassified	Unclassified	Upregulation
Prupe.6G292600	1.C.66.1.1	The Puroindoline (Puroindoline) Family	Unclassified	Unclassified	Upregulation
Prupe.7G059200	3.A.18.1.1	The Nuclear mRNA Exporter (mRNA-E) Family	Unclassified	Unclassified	Downregulation
Prupe.7G087200	2.A.49.6.1	The Chloride Carrier/Channel (ClC) Family	Unclassified	Unclassified	Upregulation
Prupe.7G106900	1.A.10.1.1	The Glutamate-gated Ion Channel (GIC) Family of Neurotransmitter Receptors	GIC	VIC Superfamily	Downregulation
Prupe.7G182400	1.A.1.4.1	The Voltage-gated Ion Channel (VIC) Superfamily	VIC	VIC Superfamily	Downregulation
Prupe.7G184400	1.A.10.1.3	The Glutamate-gated Ion Channel (GIC) Family of Neurotransmitter Receptors	GIC	VIC Superfamily	Downregulation
Prupe.7G241900	2.A.17.1.1	The Proton-dependent Oligopeptide Transporter (POT/PTR) Family	POT/PTR	Major Facilitator (MFS) Superfamily	Downregulation
Prupe.8G000800	9.B.75.1.1	The Ethanol Utilization/Transport (Eut) Protein Family	Unclassified	Unclassified	Upregulation
Prupe.8G008800	3.D.1.6.1	The H<sup>+</sup> or Na<sup>+</sup>-translocating NADH Dehydrogenase (NDH) Family	NDH	Iron-Sulfur Protein (ISP) Superfamily	Upregulation
Prupe.8G011800	3.A.18.1.1	The Nuclear mRNA Exporter (mRNA-E) Family	Unclassified	Unclassified	Upregulation
Prupe.8G025400	2.A.53.3.8	The Sulfate Permease (SulP) Family	SulP	APC Superfamily	Downregulation
Prupe.8G026600	3.A.22.1.1	The Transcription-coupled TREX/TAP Nuclear mRNA Export Complex (TREX) Family	Unclassified	Unclassified	Upregulation
Prupe.8G028900	2.A.7.3.6	The Drug/Metabolite Transporter (DMT) Superfamily	DMT	Drug/Metabolite Transporter (DMT) Superfamily	Downregulation
Prupe.8G046800	2.A.108.1.1	The Iron/Lead Transporter (ILT) Family	ILT	LysE Superfamily	Downregulation
Prupe.8G047500	2.A.108.1.1	The Iron/Lead Transporter (ILT) Family	ILT	LysE Superfamily	Upregulation
Prupe.8G051700	3.A.18.1.1	The Nuclear mRNA Exporter (mRNA-E) Family	Unclassified	Unclassified	Downregulation
Prupe.8G061100	3.A.18.1.1	The Nuclear mRNA Exporter (mRNA-E) Family	Unclassified	Unclassified	Downregulation
Prupe.8G067800	2.A.29.1.1	The Mitochondrial Carrier (MC) Family	MC	Mitochondrial Carrier (MC) Superfamily	Upregulation
Prupe.8G071600	1.C.45.1.1	The Plant Defensin (Plant Defensin) Family	PD	Defensin Superfamily	Downregulation
Prupe.8G083400	8.A.5.1.2	The Voltage-gated K<sup>+</sup> Channel ÃŽÂ²-subunit (KvÃŽÂ²) Family	Unclassified	Unclassified	Upregulation
Prupe.8G097600	1.A.1.2.2	The Voltage-gated Ion Channel (VIC) Superfamily	VIC	VIC Superfamily	Downregulation
Prupe.8G097800	1.A.1.2.2	The Voltage-gated Ion Channel (VIC) Superfamily	VIC	VIC Superfamily	Downregulation
Prupe.8G103900	3.A.11.1.1	The Bacterial Competence-related DNA Transformation Transporter (DNA-T) Family	Unclassified	Unclassified	Downregulation
Prupe.8G167600	3.A.18.1.1	The Nuclear mRNA Exporter (mRNA-E) Family	Unclassified	Unclassified	Downregulation
Prupe.8G202000	3.A.11.1.1	The Bacterial Competence-related DNA Transformation Transporter (DNA-T) Family	Unclassified	Unclassified	Downregulation
Prupe.8G210400	1.A.12.2.1	The Intracellular Chloride Channel (CLIC) Family	Unclassified	Unclassified	Downregulation
Prupe.8G217600	3.A.18.1.1	The Nuclear mRNA Exporter (mRNA-E) Family	Unclassified	Unclassified	Downregulation
Prupe.8G227100	3.A.18.1.1	The Nuclear mRNA Exporter (mRNA-E) Family	Unclassified	Unclassified	Downregulation
Prupe.8G256700	2.A.49.6.1	The Chloride Carrier/Channel (ClC) Family	Unclassified	Unclassified	Downregulation
Prupe.8G258500	9.A.24.1.1	The Mitochondrial Cholesterol/Porphyrin/5-aminolevulinic acid Uptake Translocator Protein (TSPO) Family	Unclassified	Unclassified	Downregulation
Prupe.I003200	2.A.6.6.4	The Resistance-Nodulation-Cell Division (RND) Superfamily	RND	Resistance-Nodulation-Cell Division (RND) Superfamily	Downregulation

## Sheet: TNRvsTRR
Gene ID	TCDB code	TCDB family	Family Symbol	Superfamily	Regulation
Prupe.1G012200	1.A.33.1.1	The Cation Channel-forming Heat Shock Protein-70 (Hsp70) Family	Unclassified	Unclassified	Downregulation
Prupe.1G048800	3.A.18.1.1	The Nuclear mRNA Exporter (mRNA-E) Family	Unclassified	Unclassified	Downregulation
Prupe.1G055900	1.A.12.2.1	The Intracellular Chloride Channel (CLIC) Family	Unclassified	Unclassified	Upregulation
Prupe.1G172600	8.A.11.1.1	The Immunophilin-like Prolyl:peptidyl Isomerase Regulator (I-PPI) Family	Unclassified	Unclassified	Downregulation
Prupe.1G175700	8.A.5.1.2	The Voltage-gated K<sup>+</sup> Channel ÃŽÂ²-subunit (KvÃŽÂ²) Family	Unclassified	Unclassified	Downregulation
Prupe.1G208700	2.A.17.1.1	The Proton-dependent Oligopeptide Transporter (POT/PTR) Family	POT/PTR	Major Facilitator (MFS) Superfamily	Upregulation
Prupe.1G220700	2.A.123.1.11	The Sweet; PQ-loop; Saliva; MtN3 (Sweet) Family	Sweet	Transporter-Opsin-G protein-coupled receptor (TOG) Superfamily	Downregulation
Prupe.1G241000	3.A.1.208.17	The ATP-binding Cassette (ABC) Superfamily	ABC	ABC1, ABC2, ABC3 Superfamilies	Upregulation
Prupe.1G244900	3.A.18.1.1	The Nuclear mRNA Exporter (mRNA-E) Family	Unclassified	Unclassified	Downregulation
Prupe.1G257500	2.A.7.3.6	The Drug/Metabolite Transporter (DMT) Superfamily	DMT	Drug/Metabolite Transporter (DMT) Superfamily	Downregulation
Prupe.1G264300	2.A.1.42.2	The Major Facilitator Superfamily (MFS)	MFS	Major Facilitator (MFS) Superfamily	Upregulation
Prupe.1G278800	2.A.47.2.1	The Divalent Anion:Na<sup>+</sup> Symporter (DASS) Family	DASS	IT Superfamily	Downregulation
Prupe.1G341600	1.C.45.1.1	The Plant Defensin (Plant Defensin) Family	PD	Defensin Superfamily	Upregulation
Prupe.1G346200	2.A.67.1.1	The Oligopeptide Transporter (OPT) Family	Unclassified	Unclassified	Upregulation
Prupe.1G346300	2.A.36.1.1	The Monovalent Cation:Proton Antiporter-1 (CPA1) Family	CPA1	CPA Superfamily	Downregulation
Prupe.1G361900	1.B.12.5.9	The Autotransporter-1 (AT-1) Family	AT-1	Outer Membrane Pore-forming Protein I (OMPP-I) Superfamily	Upregulation
Prupe.1G368500	3.A.11.1.1	The Bacterial Competence-related DNA Transformation Transporter (DNA-T) Family	Unclassified	Unclassified	Upregulation
Prupe.1G373000	5.A.1.1.1	The Disulfide Bond Oxidoreductase D (DsbD) Family	DsbD	LysE Superfamily	Downregulation
Prupe.1G397100	3.E.2.1.1	The Photosynthetic Reaction Center (PRC) Family	Unclassified	Unclassified	Upregulation
Prupe.1G397200	3.E.2.1.1	The Photosynthetic Reaction Center (PRC) Family	Unclassified	Unclassified	Upregulation
Prupe.1G399500	1.A.10.1.1	The Glutamate-gated Ion Channel (GIC) Family of Neurotransmitter Receptors	GIC	VIC Superfamily	Upregulation
Prupe.1G400000	1.A.10.1.1	The Glutamate-gated Ion Channel (GIC) Family of Neurotransmitter Receptors	GIC	VIC Superfamily	Upregulation
Prupe.1G400300	1.A.10.1.1	The Glutamate-gated Ion Channel (GIC) Family of Neurotransmitter Receptors	GIC	VIC Superfamily	Upregulation
Prupe.1G400400	1.A.10.1.1	The Glutamate-gated Ion Channel (GIC) Family of Neurotransmitter Receptors	GIC	VIC Superfamily	Downregulation
Prupe.1G412700	1.A.10.1.1	The Glutamate-gated Ion Channel (GIC) Family of Neurotransmitter Receptors	GIC	VIC Superfamily	Upregulation
Prupe.1G422500	3.A.18.1.1	The Nuclear mRNA Exporter (mRNA-E) Family	Unclassified	Unclassified	Upregulation
Prupe.1G425500	1.B.12.5.1	The Autotransporter-1 (AT-1) Family	AT-1	Outer Membrane Pore-forming Protein I (OMPP-I) Superfamily	Upregulation
Prupe.1G425600	1.B.12.5.1	The Autotransporter-1 (AT-1) Family	AT-1	Outer Membrane Pore-forming Protein I (OMPP-I) Superfamily	Downregulation
Prupe.1G449400	2.A.6.6.4	The Resistance-Nodulation-Cell Division (RND) Superfamily	RND	Resistance-Nodulation-Cell Division (RND) Superfamily	Upregulation
Prupe.1G449500	1.A.8.1.1	The Major Intrinsic Protein (MIP) Family	MIP	Major Intrinsic Protein (MIP) Superfamily	Upregulation
Prupe.1G456700	3.A.18.1.1	The Nuclear mRNA Exporter (mRNA-E) Family	Unclassified	Unclassified	Upregulation
Prupe.1G472600	1.A.1.4.1	The Voltage-gated Ion Channel (VIC) Superfamily	VIC	VIC Superfamily	Downregulation
Prupe.1G473600	1.A.11.3.1	The Ammonium Transporter Channel (Amt) Family	Unclassified	Unclassified	Upregulation
Prupe.1G476800	3.A.18.1.1	The Nuclear mRNA Exporter (mRNA-E) Family	Unclassified	Unclassified	Downregulation
Prupe.1G483200	2.A.66.6.2	The Multidrug/Oligosaccharidyl-lipid/Polysaccharide (MOP) Flippase Superfamily	MOP	Multidrug/Oligosaccharidyl-lipid/Polysaccharide Flippase (MOP) Superfamily	Downregulation
Prupe.1G497700	1.B.12.5.9	The Autotransporter-1 (AT-1) Family	AT-1	Outer Membrane Pore-forming Protein I (OMPP-I) Superfamily	Downregulation
Prupe.1G497800	1.B.12.5.9	The Autotransporter-1 (AT-1) Family	AT-1	Outer Membrane Pore-forming Protein I (OMPP-I) Superfamily	Downregulation
Prupe.1G523200	3.A.3.5.1	The P-type ATPase (P-ATPase) Superfamily	P-ATPase	P-type ATPase (P-ATPase) Superfamily	Downregulation
Prupe.1G558200	3.A.8.1.1	The Mitochondrial Protein Translocase (MPT) Family	MPT	Outer Membrane Pore-forming Protein IV (OMPP-IV) Superfamily	Upregulation
Prupe.1G587500	3.D.1.6.3	The H<sup>+</sup> or Na<sup>+</sup>-translocating NADH Dehydrogenase (NDH) Family	NDH	Iron-Sulfur Protein (ISP) Superfamily	Downregulation
Prupe.2G005500	1.A.5.1.1	The Polycystin Cation Channel (PCC) Family	PCC	Leucine-rich Repeat-containing Domain (LRRD) Superfamily	Downregulation
Prupe.2G024100	2.A.2.4.1	The Glycoside-Pentoside-Hexuronide (GPH):Cation Symporter Family	GPH	Major Facilitator (MFS) Superfamily	Downregulation
Prupe.2G037200	2.A.66.1.1	The Multidrug/Oligosaccharidyl-lipid/Polysaccharide (MOP) Flippase Superfamily	MOP	Multidrug/Oligosaccharidyl-lipid/Polysaccharide Flippase (MOP) Superfamily	Downregulation
Prupe.2G050800	8.A.5.1.2	The Voltage-gated K<sup>+</sup> Channel ÃŽÂ²-subunit (KvÃŽÂ²) Family	Unclassified	Unclassified	Downregulation
Prupe.2G076700	3.A.18.1.1	The Nuclear mRNA Exporter (mRNA-E) Family	Unclassified	Unclassified	Downregulation
Prupe.2G077700	3.A.18.1.1	The Nuclear mRNA Exporter (mRNA-E) Family	Unclassified	Unclassified	Downregulation
Prupe.2G077800	2.A.108.1.1	The Iron/Lead Transporter (ILT) Family	ILT	LysE Superfamily	Downregulation
Prupe.2G080400	3.A.18.1.1	The Nuclear mRNA Exporter (mRNA-E) Family	Unclassified	Unclassified	Downregulation
Prupe.2G097700	1.C.4.1.1	The Aerolysin Channel-forming Toxin (Aerolysin) Family	Aerolysin	Aerolysin Superfamily	Upregulation
Prupe.2G101400	1.A.12.2.1	The Intracellular Chloride Channel (CLIC) Family	Unclassified	Unclassified	Upregulation
Prupe.2G130500	3.A.18.1.1	The Nuclear mRNA Exporter (mRNA-E) Family	Unclassified	Unclassified	Downregulation
Prupe.2G130600	3.A.18.1.1	The Nuclear mRNA Exporter (mRNA-E) Family	Unclassified	Unclassified	Upregulation
Prupe.2G144600	3.D.1.6.3	The H<sup>+</sup> or Na<sup>+</sup>-translocating NADH Dehydrogenase (NDH) Family	NDH	Iron-Sulfur Protein (ISP) Superfamily	Upregulation
Prupe.2G153500	2.A.94.1.1	The Phosphate Permease (Pho1) Family	Pho1	IT Superfamily	Downregulation
Prupe.2G157300	8.A.30.1.1	The Nedd4-Family Interacting Protein-2 (Nedd4) Family	Nedd4	Synaptotagmin Domain-containing (SynapD) Superfamily	Upregulation
Prupe.2G158000	3.A.5.1.1	The General Secretory Pathway (Sec) Family	Sec	Ankyrin Repeat Domain-containing (Ank) Superfamily	Downregulation
Prupe.2G169000	3.A.18.1.1	The Nuclear mRNA Exporter (mRNA-E) Family	Unclassified	Unclassified	Downregulation
Prupe.2G181700	1.I.1.1.1	The Nuclear Pore Complex (NPC) Family	NPC	Ankyrin Repeat Domain-containing (Ank) Superfamily	Downregulation
Prupe.2G205600	2.A.108.1.1	The Iron/Lead Transporter (ILT) Family	ILT	LysE Superfamily	Upregulation
Prupe.2G234200	1.A.33.1.1	The Cation Channel-forming Heat Shock Protein-70 (Hsp70) Family	Unclassified	Unclassified	Downregulation
Prupe.2G234400	1.A.33.1.1	The Cation Channel-forming Heat Shock Protein-70 (Hsp70) Family	Unclassified	Unclassified	Downregulation
Prupe.2G248400	3.A.18.1.1	The Nuclear mRNA Exporter (mRNA-E) Family	Unclassified	Unclassified	Upregulation
Prupe.2G305600	3.A.1.208.17	The ATP-binding Cassette (ABC) Superfamily	ABC	ABC1, ABC2, ABC3 Superfamilies	Downregulation
Prupe.2G306600	2.A.2.4.1	The Glycoside-Pentoside-Hexuronide (GPH):Cation Symporter Family	GPH	Major Facilitator (MFS) Superfamily	Upregulation
Prupe.3G009400	1.A.8.1.1	The Major Intrinsic Protein (MIP) Family	MIP	Major Intrinsic Protein (MIP) Superfamily	Upregulation
Prupe.3G014500	1.A.12.2.1	The Intracellular Chloride Channel (CLIC) Family	Unclassified	Unclassified	Upregulation
Prupe.3G015300	8.A.39.1.1	The Homeobox; Penetratin (Penetratin) Family	Unclassified	Unclassified	Upregulation
Prupe.3G024600	3.A.18.1.1	The Nuclear mRNA Exporter (mRNA-E) Family	Unclassified	Unclassified	Upregulation
Prupe.3G025400	2.A.49.6.1	The Chloride Carrier/Channel (ClC) Family	Unclassified	Unclassified	Downregulation
Prupe.3G032900	1.B.12.5.9	The Autotransporter-1 (AT-1) Family	AT-1	Outer Membrane Pore-forming Protein I (OMPP-I) Superfamily	Upregulation
Prupe.3G033500	1.B.12.5.9	The Autotransporter-1 (AT-1) Family	AT-1	Outer Membrane Pore-forming Protein I (OMPP-I) Superfamily	Downregulation
Prupe.3G033600	1.B.12.5.9	The Autotransporter-1 (AT-1) Family	AT-1	Outer Membrane Pore-forming Protein I (OMPP-I) Superfamily	Downregulation
Prupe.3G035800	3.D.1.6.1	The H<sup>+</sup> or Na<sup>+</sup>-translocating NADH Dehydrogenase (NDH) Family	NDH	Iron-Sulfur Protein (ISP) Superfamily	Upregulation
Prupe.3G036400	3.A.1.208.17	The ATP-binding Cassette (ABC) Superfamily	ABC	ABC1, ABC2, ABC3 Superfamilies	Upregulation
Prupe.3G041400	8.A.30.1.1	The Nedd4-Family Interacting Protein-2 (Nedd4) Family	Nedd4	Synaptotagmin Domain-containing (SynapD) Superfamily	Upregulation
Prupe.3G060000	3.A.1.208.17	The ATP-binding Cassette (ABC) Superfamily	ABC	ABC1, ABC2, ABC3 Superfamilies	Downregulation
Prupe.3G062300	1.A.1.4.1	The Voltage-gated Ion Channel (VIC) Superfamily	VIC	VIC Superfamily	Upregulation
Prupe.3G063300	2.A.6.6.4	The Resistance-Nodulation-Cell Division (RND) Superfamily	RND	Resistance-Nodulation-Cell Division (RND) Superfamily	Upregulation
Prupe.3G065300	1.A.1.4.1	The Voltage-gated Ion Channel (VIC) Superfamily	VIC	VIC Superfamily	Downregulation
Prupe.3G068400	2.A.102.1.1	The 4-Toluene Sulfonate Uptake Permease (TSUP) Family	TSUP	Transporter-Opsin-G protein-coupled receptor (TOG) Superfamily	Downregulation
Prupe.3G071100	2.A.2.4.1	The Glycoside-Pentoside-Hexuronide (GPH):Cation Symporter Family	GPH	Major Facilitator (MFS) Superfamily	Downregulation
Prupe.3G072200	2.A.6.6.4	The Resistance-Nodulation-Cell Division (RND) Superfamily	RND	Resistance-Nodulation-Cell Division (RND) Superfamily	Downregulation
Prupe.3G076500	3.A.1.208.17	The ATP-binding Cassette (ABC) Superfamily	ABC	ABC1, ABC2, ABC3 Superfamilies	Upregulation
Prupe.3G077900	2.A.31.1.1	The Anion Exchanger (AE) Family	AE	APC Superfamily	Downregulation
Prupe.3G102300	1.A.33.1.1	The Cation Channel-forming Heat Shock Protein-70 (Hsp70) Family	Unclassified	Unclassified	Downregulation
Prupe.3G149800	2.A.66.1.1	The Multidrug/Oligosaccharidyl-lipid/Polysaccharide (MOP) Flippase Superfamily	MOP	Multidrug/Oligosaccharidyl-lipid/Polysaccharide Flippase (MOP) Superfamily	Downregulation
Prupe.3G153300	1.C.4.5.1	The Aerolysin Channel-forming Toxin (Aerolysin) Family	Aerolysin	Aerolysin Superfamily	Upregulation
Prupe.3G156500	1.C.57.3.4	The Clostridial Cytotoxin (CCT) Family	CCT	RTX-toxin Superfamily	Downregulation
Prupe.3G191000	1.A.8.1.1	The Major Intrinsic Protein (MIP) Family	MIP	Major Intrinsic Protein (MIP) Superfamily	Downregulation
Prupe.3G230400	3.A.3.2.29	The P-type ATPase (P-ATPase) Superfamily	P-ATPase	P-type ATPase (P-ATPase) Superfamily	Upregulation
Prupe.3G230500	3.A.3.2.29	The P-type ATPase (P-ATPase) Superfamily	P-ATPase	P-type ATPase (P-ATPase) Superfamily	Upregulation
Prupe.3G230600	3.A.3.2.29	The P-type ATPase (P-ATPase) Superfamily	P-ATPase	P-type ATPase (P-ATPase) Superfamily	Upregulation
Prupe.3G266900	3.A.16.1.2	The Endoplasmic Reticular Retrotranslocon (ER-RT) Family	ER-RT	AAA-ATPase Superfamily	Downregulation
Prupe.3G274600	2.A.1.42.2	The Major Facilitator Superfamily (MFS)	MFS	Major Facilitator (MFS) Superfamily	Upregulation
Prupe.3G277700	3.A.23.1.1	The Type VI Symbiosis/Virulence Secretory System (T6SS) Family	T6SS	ATP-dependent Clp Protease (Clp) Superfamily	Downregulation
Prupe.4G037900	3.A.3.2.29	The P-type ATPase (P-ATPase) Superfamily	P-ATPase	P-type ATPase (P-ATPase) Superfamily	Upregulation
Prupe.4G045700	1.A.12.1.5	The Intracellular Chloride Channel (CLIC) Family	Unclassified	Unclassified	Downregulation
Prupe.4G063600	3.A.18.1.1	The Nuclear mRNA Exporter (mRNA-E) Family	Unclassified	Unclassified	Upregulation
Prupe.4G067200	2.A.20.1.1	The Inorganic Phosphate Transporter (PiT) Family	Unclassified	Unclassified	Upregulation
Prupe.4G070100	2.A.17.1.1	The Proton-dependent Oligopeptide Transporter (POT/PTR) Family	POT/PTR	Major Facilitator (MFS) Superfamily	Upregulation
Prupe.4G092800	1.A.1.2.2	The Voltage-gated Ion Channel (VIC) Superfamily	VIC	VIC Superfamily	Downregulation
Prupe.4G093400	9.B.87.1.1	The Selenoprotein P Receptor (SelP-Receptor) Family	SelP Receptor	Ankyrin Repeat Domain-containing (Ank) Superfamily	Upregulation
Prupe.4G094100	9.B.87.1.1	The Selenoprotein P Receptor (SelP-Receptor) Family	SelP Receptor	Ankyrin Repeat Domain-containing (Ank) Superfamily	Downregulation
Prupe.4G104300	3.A.18.1.1	The Nuclear mRNA Exporter (mRNA-E) Family	Unclassified	Unclassified	Downregulation
Prupe.4G104500	3.A.18.1.1	The Nuclear mRNA Exporter (mRNA-E) Family	Unclassified	Unclassified	Downregulation
Prupe.4G116800	3.A.18.1.1	The Nuclear mRNA Exporter (mRNA-E) Family	Unclassified	Unclassified	Downregulation
Prupe.4G117000	3.A.18.1.1	The Nuclear mRNA Exporter (mRNA-E) Family	Unclassified	Unclassified	Downregulation
Prupe.4G117100	2.A.5.1.1	The Zinc (Zn<sup>2+</sup>)-Iron (Fe<sup>2+</sup>) Permease (ZIP) Family	Unclassified	Unclassified	Downregulation
Prupe.4G130500	1.A.1.2.2	The Voltage-gated Ion Channel (VIC) Superfamily	VIC	VIC Superfamily	Downregulation
Prupe.4G131400	1.C.45.1.1	The Plant Defensin (Plant Defensin) Family	PD	Defensin Superfamily	Downregulation
Prupe.4G145900	1.A.12.2.1	The Intracellular Chloride Channel (CLIC) Family	Unclassified	Unclassified	Downregulation
Prupe.4G146000	1.A.12.2.1	The Intracellular Chloride Channel (CLIC) Family	Unclassified	Unclassified	Downregulation
Prupe.4G146200	1.A.12.2.1	The Intracellular Chloride Channel (CLIC) Family	Unclassified	Unclassified	Downregulation
Prupe.4G168900	3.A.18.1.1	The Nuclear mRNA Exporter (mRNA-E) Family	Unclassified	Unclassified	Upregulation
Prupe.4G204300	3.A.1.208.17	The ATP-binding Cassette (ABC) Superfamily	ABC	ABC1, ABC2, ABC3 Superfamilies	Upregulation
Prupe.4G206000	9.B.64.1.1	The Putative Cholesterol Transporter (Start1) Family	Unclassified	Unclassified	Downregulation
Prupe.4G232000	3.A.18.1.1	The Nuclear mRNA Exporter (mRNA-E) Family	Unclassified	Unclassified	Upregulation
Prupe.4G232400	3.A.18.1.1	The Nuclear mRNA Exporter (mRNA-E) Family	Unclassified	Unclassified	Downregulation
Prupe.4G244400	2.A.29.1.1	The Mitochondrial Carrier (MC) Family	MC	Mitochondrial Carrier (MC) Superfamily	Downregulation
Prupe.4G245900	2.A.1.42.2	The Major Facilitator Superfamily (MFS)	MFS	Major Facilitator (MFS) Superfamily	Upregulation
Prupe.4G246600	3.A.18.1.1	The Nuclear mRNA Exporter (mRNA-E) Family	Unclassified	Unclassified	Downregulation
Prupe.4G254600	3.A.1.208.17	The ATP-binding Cassette (ABC) Superfamily	ABC	ABC1, ABC2, ABC3 Superfamilies	Downregulation
Prupe.4G277700	2.A.18.6.8	The Amino Acid/Auxin Permease (AAAP) Family	AAAP	APC Superfamily	Downregulation
Prupe.4G283500	2.A.36.1.1	The Monovalent Cation:Proton Antiporter-1 (CPA1) Family	CPA1	CPA Superfamily	Upregulation
Prupe.4G284200	1.A.11.3.1	The Ammonium Transporter Channel (Amt) Family	Unclassified	Unclassified	Downregulation
Prupe.4G284700	1.A.11.3.1	The Ammonium Transporter Channel (Amt) Family	Unclassified	Unclassified	Downregulation
Prupe.4G285000	1.A.11.3.1	The Ammonium Transporter Channel (Amt) Family	Unclassified	Unclassified	Downregulation
Prupe.5G005000	3.D.1.6.3	The H<sup>+</sup> or Na<sup>+</sup>-translocating NADH Dehydrogenase (NDH) Family	NDH	Iron-Sulfur Protein (ISP) Superfamily	Upregulation
Prupe.5G062200	3.A.3.1.1	The P-type ATPase (P-ATPase) Superfamily	P-ATPase	P-type ATPase (P-ATPase) Superfamily	Upregulation
Prupe.5G085100	1.B.12.5.1	The Autotransporter-1 (AT-1) Family	AT-1	Outer Membrane Pore-forming Protein I (OMPP-I) Superfamily	Upregulation
Prupe.5G085200	1.B.12.5.1	The Autotransporter-1 (AT-1) Family	AT-1	Outer Membrane Pore-forming Protein I (OMPP-I) Superfamily	Upregulation
Prupe.5G085700	1.B.12.5.1	The Autotransporter-1 (AT-1) Family	AT-1	Outer Membrane Pore-forming Protein I (OMPP-I) Superfamily	Upregulation
Prupe.5G085800	1.B.12.5.1	The Autotransporter-1 (AT-1) Family	AT-1	Outer Membrane Pore-forming Protein I (OMPP-I) Superfamily	Upregulation
Prupe.5G086100	1.B.12.5.1	The Autotransporter-1 (AT-1) Family	AT-1	Outer Membrane Pore-forming Protein I (OMPP-I) Superfamily	Upregulation
Prupe.5G088500	1.B.12.5.1	The Autotransporter-1 (AT-1) Family	AT-1	Outer Membrane Pore-forming Protein I (OMPP-I) Superfamily	Upregulation
Prupe.5G088600	1.B.12.5.1	The Autotransporter-1 (AT-1) Family	AT-1	Outer Membrane Pore-forming Protein I (OMPP-I) Superfamily	Upregulation
Prupe.5G101400	1.A.8.1.1	The Major Intrinsic Protein (MIP) Family	MIP	Major Intrinsic Protein (MIP) Superfamily	Downregulation
Prupe.5G162500	2.A.18.6.8	The Amino Acid/Auxin Permease (AAAP) Family	AAAP	APC Superfamily	Downregulation
Prupe.5G186500	1.B.8.1.1	The Mitochondrial and Plastid Porin (MPP) Family	MPP	Outer Membrane Pore-forming Protein I (OMPP-I) Superfamily	Upregulation
Prupe.5G192500	1.A.12.2.1	The Intracellular Chloride Channel (CLIC) Family	Unclassified	Unclassified	Upregulation
Prupe.5G203700	3.A.16.1.2	The Endoplasmic Reticular Retrotranslocon (ER-RT) Family	ER-RT	AAA-ATPase Superfamily	Downregulation
Prupe.5G230200	5.B.1.1.6	The Phagocyte (gp91<sup>phox</sup>) NADPH Oxidase Family	gp91phox	Calmodulin/Calcineurin/KChIP (CaCa) Superfamily	Downregulation
Prupe.5G235100	3.A.1.208.17	The ATP-binding Cassette (ABC) Superfamily	ABC	ABC1, ABC2, ABC3 Superfamilies	Upregulation
Prupe.6G005500	3.A.2.2.3	The H<sup>+</sup>- or Na<sup>+</sup>-translocating F-type, V-type and A-type ATPase (F-ATPase) Superfamily	Unclassified	Unclassified	Upregulation
Prupe.6G018300	4.C.1.1.3	The Fatty Acid Transporter (FAT) Family	Unclassified	Unclassified	Upregulation
Prupe.6G026300	2.A.67.1.1	The Oligopeptide Transporter (OPT) Family	Unclassified	Unclassified	Upregulation
Prupe.6G034800	2.A.66.3.1	The Multidrug/Oligosaccharidyl-lipid/Polysaccharide (MOP) Flippase Superfamily	MOP	Multidrug/Oligosaccharidyl-lipid/Polysaccharide Flippase (MOP) Superfamily	Upregulation
Prupe.6G051200	3.D.1.6.3	The H<sup>+</sup> or Na<sup>+</sup>-translocating NADH Dehydrogenase (NDH) Family	NDH	Iron-Sulfur Protein (ISP) Superfamily	Upregulation
Prupe.6G051300	3.D.1.6.3	The H<sup>+</sup> or Na<sup>+</sup>-translocating NADH Dehydrogenase (NDH) Family	NDH	Iron-Sulfur Protein (ISP) Superfamily	Upregulation
Prupe.6G057900	3.A.1.208.17	The ATP-binding Cassette (ABC) Superfamily	ABC	ABC1, ABC2, ABC3 Superfamilies	Downregulation
Prupe.6G060100	2.A.2.2.2	The Glycoside-Pentoside-Hexuronide (GPH):Cation Symporter Family	GPH	Major Facilitator (MFS) Superfamily	Upregulation
Prupe.6G063400	2.A.7.15.3	The Drug/Metabolite Transporter (DMT) Superfamily	DMT	Drug/Metabolite Transporter (DMT) Superfamily	Downregulation
Prupe.6G066900	1.A.56.1.1	The Copper Transporter (Ctr) Family	Unclassified	Unclassified	Upregulation
Prupe.6G074700	3.A.18.1.1	The Nuclear mRNA Exporter (mRNA-E) Family	Unclassified	Unclassified	Upregulation
Prupe.6G088800	5.B.6.1.1	The Transmembrane Epithelial Antigen Protein-3 Ferric Reductase (STEAP) Family	Unclassified	Unclassified	Downregulation
Prupe.6G091800	2.A.17.1.1	The Proton-dependent Oligopeptide Transporter (POT/PTR) Family	POT/PTR	Major Facilitator (MFS) Superfamily	Downregulation
Prupe.6G091900	2.A.17.1.1	The Proton-dependent Oligopeptide Transporter (POT/PTR) Family	POT/PTR	Major Facilitator (MFS) Superfamily	Downregulation
Prupe.6G127100	1.B.12.5.1	The Autotransporter-1 (AT-1) Family	AT-1	Outer Membrane Pore-forming Protein I (OMPP-I) Superfamily	Upregulation
Prupe.6G142800	1.A.1.2.2	The Voltage-gated Ion Channel (VIC) Superfamily	VIC	VIC Superfamily	Downregulation
Prupe.6G144100	2.A.85.2.1	The Aromatic Acid Exporter (ArAE) Family	ArAE	Major Facilitator (MFS) Superfamily	Upregulation
Prupe.6G151200	2.A.2.4.1	The Glycoside-Pentoside-Hexuronide (GPH):Cation Symporter Family	GPH	Major Facilitator (MFS) Superfamily	Downregulation
Prupe.6G182700	3.A.8.1.1	The Mitochondrial Protein Translocase (MPT) Family	MPT	Outer Membrane Pore-forming Protein IV (OMPP-IV) Superfamily	Upregulation
Prupe.6G191500	3.A.1.208.17	The ATP-binding Cassette (ABC) Superfamily	ABC	ABC1, ABC2, ABC3 Superfamilies	Upregulation
Prupe.6G197500	3.A.18.1.1	The Nuclear mRNA Exporter (mRNA-E) Family	Unclassified	Unclassified	Upregulation
Prupe.6G208600	3.A.1.208.17	The ATP-binding Cassette (ABC) Superfamily	ABC	ABC1, ABC2, ABC3 Superfamilies	Upregulation
Prupe.6G237000	1.A.8.1.1	The Major Intrinsic Protein (MIP) Family	MIP	Major Intrinsic Protein (MIP) Superfamily	Downregulation
Prupe.6G249600	2.A.7.3.6	The Drug/Metabolite Transporter (DMT) Superfamily	DMT	Drug/Metabolite Transporter (DMT) Superfamily	Upregulation
Prupe.6G281100	3.A.18.1.1	The Nuclear mRNA Exporter (mRNA-E) Family	Unclassified	Unclassified	Upregulation
Prupe.6G354100	1.B.12.5.9	The Autotransporter-1 (AT-1) Family	AT-1	Outer Membrane Pore-forming Protein I (OMPP-I) Superfamily	Downregulation
Prupe.6G356800	1.B.12.5.1	The Autotransporter-1 (AT-1) Family	AT-1	Outer Membrane Pore-forming Protein I (OMPP-I) Superfamily	Upregulation
Prupe.7G059200	3.A.18.1.1	The Nuclear mRNA Exporter (mRNA-E) Family	Unclassified	Unclassified	Downregulation
Prupe.7G106900	1.A.10.1.1	The Glutamate-gated Ion Channel (GIC) Family of Neurotransmitter Receptors	GIC	VIC Superfamily	Downregulation
Prupe.7G182400	1.A.1.4.1	The Voltage-gated Ion Channel (VIC) Superfamily	VIC	VIC Superfamily	Downregulation
Prupe.7G184400	1.A.10.1.3	The Glutamate-gated Ion Channel (GIC) Family of Neurotransmitter Receptors	GIC	VIC Superfamily	Downregulation
Prupe.7G210900	1.A.1.4.1	The Voltage-gated Ion Channel (VIC) Superfamily	VIC	VIC Superfamily	Upregulation
Prupe.7G226300	2.A.17.1.1	The Proton-dependent Oligopeptide Transporter (POT/PTR) Family	POT/PTR	Major Facilitator (MFS) Superfamily	Upregulation
Prupe.7G241900	2.A.17.1.1	The Proton-dependent Oligopeptide Transporter (POT/PTR) Family	POT/PTR	Major Facilitator (MFS) Superfamily	Downregulation
Prupe.7G265200	1.A.33.1.1	The Cation Channel-forming Heat Shock Protein-70 (Hsp70) Family	Unclassified	Unclassified	Downregulation
Prupe.8G008400	3.D.1.6.1	The H<sup>+</sup> or Na<sup>+</sup>-translocating NADH Dehydrogenase (NDH) Family	NDH	Iron-Sulfur Protein (ISP) Superfamily	Upregulation
Prupe.8G008800	3.D.1.6.1	The H<sup>+</sup> or Na<sup>+</sup>-translocating NADH Dehydrogenase (NDH) Family	NDH	Iron-Sulfur Protein (ISP) Superfamily	Upregulation
Prupe.8G011800	3.A.18.1.1	The Nuclear mRNA Exporter (mRNA-E) Family	Unclassified	Unclassified	Upregulation
Prupe.8G025400	2.A.53.3.8	The Sulfate Permease (SulP) Family	SulP	APC Superfamily	Downregulation
Prupe.8G026600	3.A.22.1.1	The Transcription-coupled TREX/TAP Nuclear mRNA Export Complex (TREX) Family	Unclassified	Unclassified	Upregulation
Prupe.8G046800	2.A.108.1.1	The Iron/Lead Transporter (ILT) Family	ILT	LysE Superfamily	Downregulation
Prupe.8G047300	2.A.108.1.1	The Iron/Lead Transporter (ILT) Family	ILT	LysE Superfamily	Upregulation
Prupe.8G047900	2.A.108.1.1	The Iron/Lead Transporter (ILT) Family	ILT	LysE Superfamily	Downregulation
Prupe.8G051700	3.A.18.1.1	The Nuclear mRNA Exporter (mRNA-E) Family	Unclassified	Unclassified	Downregulation
Prupe.8G061100	3.A.18.1.1	The Nuclear mRNA Exporter (mRNA-E) Family	Unclassified	Unclassified	Downregulation
Prupe.8G097600	1.A.1.2.2	The Voltage-gated Ion Channel (VIC) Superfamily	VIC	VIC Superfamily	Downregulation
Prupe.8G097800	1.A.1.2.2	The Voltage-gated Ion Channel (VIC) Superfamily	VIC	VIC Superfamily	Downregulation
Prupe.8G103900	3.A.11.1.1	The Bacterial Competence-related DNA Transformation Transporter (DNA-T) Family	Unclassified	Unclassified	Downregulation
Prupe.8G104500	3.A.11.1.1	The Bacterial Competence-related DNA Transformation Transporter (DNA-T) Family	Unclassified	Unclassified	Downregulation
Prupe.8G172800	1.B.12.5.9	The Autotransporter-1 (AT-1) Family	AT-1	Outer Membrane Pore-forming Protein I (OMPP-I) Superfamily	Upregulation
Prupe.8G202000	3.A.11.1.1	The Bacterial Competence-related DNA Transformation Transporter (DNA-T) Family	Unclassified	Unclassified	Downregulation
Prupe.8G210400	1.A.12.2.1	The Intracellular Chloride Channel (CLIC) Family	Unclassified	Unclassified	Downregulation
Prupe.8G217600	3.A.18.1.1	The Nuclear mRNA Exporter (mRNA-E) Family	Unclassified	Unclassified	Downregulation
Prupe.8G217700	3.A.18.1.1	The Nuclear mRNA Exporter (mRNA-E) Family	Unclassified	Unclassified	Downregulation
Prupe.8G218400	2.A.17.1.1	The Proton-dependent Oligopeptide Transporter (POT/PTR) Family	POT/PTR	Major Facilitator (MFS) Superfamily	Upregulation
Prupe.8G227100	3.A.18.1.1	The Nuclear mRNA Exporter (mRNA-E) Family	Unclassified	Unclassified	Downregulation
Prupe.8G233700	1.A.11.3.1	The Ammonium Transporter Channel (Amt) Family	Unclassified	Unclassified	Upregulation
Prupe.8G256700	2.A.49.6.1	The Chloride Carrier/Channel (ClC) Family	Unclassified	Unclassified	Downregulation
Prupe.8G258500	9.A.24.1.1	The Mitochondrial Cholesterol/Porphyrin/5-aminolevulinic acid Uptake Translocator Protein (TSPO) Family	Unclassified	Unclassified	Downregulation
Prupe.I003200	2.A.6.6.4	The Resistance-Nodulation-Cell Division (RND) Superfamily	RND	Resistance-Nodulation-Cell Division (RND) Superfamily	Downregulation
