# Supplementary material for: Morphological, Physiological, Biochemical, and Transcriptome Studies Reveal The Importance of Different Component Traits During Salinity Stress in Prunus
Source: Research Square preprint supplement (doi:10.21203/rs.3.rs-659140/v1), 2021-07-07
Supplement: Supplementary file 7 [file 670731e2330b6bb629b8ea44.docx]

**Supplementary Table S1**. Experimental setup shows leaf and root samples from two rootstocks ‘Nemaguard’ (salt-sensitive) and ‘Rootpac 40’ (salt-tolerant) subjected to control and salt treatment

| **Tissue** | **Replicates** | **Control** | | **Salt treatment** | |
| --- | --- | --- | --- | --- | --- |
| **‘Nemaguard’** | **‘Rootpac 40’** | **‘Nemaguard’** | **‘Rootpac 40’** |
| **Leaf** | R1 | CNL-1 | CRL-1 | TNL-1 | TRL-1 |
| R2 | CNL-2 | CRL-2 | TNL-2 | TRL-2 |
| R3 | CNL-3 | CRL-3 | TNL-3 | TRL-3 |
| **Root** | R1 | CNR-1 | CRR-1 | TNR-1 | TRR-1 |
| R2 | CNR-2 | CRR-2 | TNR-2 | TRR-2 |
| R3 | CNR-3 | CRR-3 | TNR-3 | TRR-3 |
