# Supplementary material for: Morphological, Physiological, Biochemical, and Transcriptome Studies Reveal The Importance of Different Component Traits During Salinity Stress in Prunus
Source: Research Square preprint supplement (doi:10.21203/rs.3.rs-659140/v1), 2021-07-07
Supplement: Supplementary file 8 [file da39472b5bcd1e4e0dc9333e.xlsx]

## Sheet: Sheet1
Supplementary Table S4. List of the genes studied for expression analysis by qRT-PCR.
Gene ID	Description
Prupe.7G141400	Methylesterase 4-related
Prupe.1G570800	Cupin
Prupe.6G324100	Linoleate 9S-lipoxygenase (LOX1_5)
Prupe.7G255400	IgA-specific serine endopeptidase / Immunoglobulin A1 protease
Prupe.1G292500	11-oxo-beta-amyrin 30-oxidase / CYP72A154
Prupe.2G250900	2-Oxoglutarate (2og) and fe(ii)-dependent oxygenase-like protein
Prupe.6G121800	Iron-chelate-transporting ATPase
Prupe.1G350700	High mobility group protein B3 (HMGB3)
Prupe.3G242700	DNA replication regulator DPB11-related
Prupe.7G168100	Family not named
Prupe.3G178400	Family not named
Prupe.5G141200	Family not named (AP2 domain)
Prupe.1G080500	Chitinase
Prupe.4G147100	Glutathione s-transferase
Prupe.6G025100	X-Box transcription factor related
Prupe.6G156300	Beta-glucosidase
Prupe.1G476500	BURP domain
Prupe.6G272900	Glycerol-3-phosphate 2-O-acyltransferase 6
Prupe.8G148400	Serine carboxypeptidases
Prupe.1G449200	Beta-Carotene Dioxygenase (Abscisic acid biosynthesis)
Prupe.6G010500	Dirigent protein 19
Prupe.1G449500	Aquaporin
Prupe.4G241000	Zinc/Iron transporter
Prupe.1G492500	Manganese transporter
Prupe.7G179100	Strictosidine synthase related
Prupe.6G195500	Multidrug resistance protein
Prupe.6G272400	Oligopeptide transporter-related
Prupe.1G080600	Chitinase related
Prupe.1G331100	PLAC8 family (PLAC8)
Prupe.6G025100	X-Box transcription factor related
Prupe.6G211500	Allyl-alcohol dehydrogenase
Prupe.4G024500	Glucose-6-phosphate/phosphate and phosphoenolpyruvate/phosphate antiporter
Prupe.4G146200	Glutathione s-transferase
Prupe.1G449200	Beta-Carotene Dioxygenase (Abscisic acid biosynthesis)
Prupe.1G382700	Hydroquinone glucosyltransferase
Prupe.6G010500	Dirigent protein 19 (Nucleoporin-related)
Prupe.8G008700	Disease resistance protein RPM1 (RPM1, RPS3)
Prupe.2G243800	Small heat-shock protein
Prupe.3G005100	Glycogenin
Prupe.6G014700	Nucleolar complex protein 2
Prupe.6G272400	Oligopeptide transporter-related
