# Supplementary material for: Morphological, Physiological, Biochemical, and Transcriptome Studies Reveal The Importance of Different Component Traits During Salinity Stress in Prunus
Source: Research Square preprint supplement (doi:10.21203/rs.3.rs-659140/v1), 2021-07-07
Supplement: Supplementary file 10 [file fc1d31c0e102542e6c5f6991.xlsx]

## Sheet: TNL_vs_CNL_KEGG
Supplementary Table S7. KEGG enrichment analysis of differentially expressed genes (DEGs). Different sheets represent different comparisons.
KEGG Pathway ID	Description	p.adjust	Count	Genes
pper02010	ABC transporters	0.0136377	2	Prupe.1G104100, Prupe.1G104400

## Sheet: TNR_vs_CNR_KEGG
KEGG Pathway ID	Description	p.adjust	Count	Genes
pper04626	Plant-pathogen interaction	0.00545623	3	Prupe.3G303600, Prupe.8G153100, Prupe.8G153100, Prupe.8G153700, Prupe.8G153700
pper04016	MAPK signaling pathway - plant	0.0212352	2	Prupe.8G153100, Prupe.8G153100, Prupe.8G153700, Prupe.8G153700
pper04141	Protein processing in endoplasmic reticulum	0.0405283	2	Prupe.1G237800, Prupe.3G017400
pper04075	Plant hormone signal transduction	0.0405283	2	Prupe.8G153100, Prupe.8G153100, Prupe.8G153700, Prupe.8G153700

## Sheet: TRR_vs_CRR_KEGG
KEGG Pathway ID	Description	p.adjust	Count	Genes
pper04141	Protein processing in endoplasmic reticulum	0.00223133	2	Prupe.1G586200, Prupe.2G243400

## Sheet: CNL_vs_CRL_KEGG
KEGG Pathway ID	Description	p.adjust	Count	Genes
pper00480	Glutathione metabolism	0.000178106	20	Prupe.1G055000, Prupe.1G056100, Prupe.1G456300, Prupe.1G526000, Prupe.3G306600, Prupe.4G146000, Prupe.4G146100, Prupe.4G146200, Prupe.4G146800, Prupe.4G147200, Prupe.5G191500, Prupe.5G192600, Prupe.5G192700, Prupe.5G228100, Prupe.6G040700, Prupe.6G242200, Prupe.8G210200, Prupe.8G210400, Prupe.8G210500, Prupe.8G210700
pper00350	Tyrosine metabolism	0.000901959	10	Prupe.1G011900, Prupe.1G012000, Prupe.1G012100, Prupe.1G356700, Prupe.3G133100, Prupe.4G041400, Prupe.4G041700, Prupe.4G041900, Prupe.8G018300, Prupe.8G018600
pper00950	Isoquinoline alkaloid biosynthesis	0.000901959	7	Prupe.1G011900, Prupe.1G012000, Prupe.1G012100, Prupe.3G133100, Prupe.4G041400, Prupe.4G041700, Prupe.4G041900
pper00073	Cutin, suberine and wax biosynthesis	0.00168425	8	Prupe.1G046800, Prupe.2G086300, Prupe.2G113600, Prupe.2G171800, Prupe.5G102600, Prupe.6G126600, Prupe.6G126800, Prupe.6G126900
pper00460	Cyanoamino acid metabolism	0.0024633	10	Prupe.1G007400, Prupe.1G430400, Prupe.1G519600, Prupe.1G539400, Prupe.2G092300, Prupe.3G111000, Prupe.5G164100, Prupe.6G018800, Prupe.6G134900, Prupe.8G165700
pper00940	Phenylpropanoid biosynthesis	0.00905565	19	Prupe.1G227100, Prupe.2G092300, Prupe.2G199400, Prupe.2G199600, Prupe.3G097600, Prupe.3G101400, Prupe.3G194000, Prupe.4G021100, Prupe.6G013200, Prupe.6G013500, Prupe.6G018800, Prupe.6G044300, Prupe.6G192000, Prupe.6G223400, Prupe.7G161900, Prupe.8G038900, Prupe.8G130800, Prupe.8G130900, Prupe.8G165700
pper04626	Plant-pathogen interaction	0.0313095	19	Prupe.1G023600, Prupe.1G384400, Prupe.1G542800, Prupe.3G099200, Prupe.3G259100, Prupe.3G266000, Prupe.3G303600, Prupe.4G055500, Prupe.4G191200, Prupe.4G201800, Prupe.5G025400, Prupe.5G162000, Prupe.5G194800, Prupe.6G286000, Prupe.7G090800, Prupe.8G008700, Prupe.8G009000, Prupe.8G096100, Prupe.8G234000

## Sheet: CNR_vs_CRR_KEGG
KEGG Pathway ID	Description	p.adjust	Count	Genes
pper00196	Photosynthesis - antenna proteins	0.000877234	5	Prupe.1G225700, Prupe.3G174600, Prupe.4G076200, Prupe.4G190500, Prupe.8G142700
pper00960	Tropane, piperidine and pyridine alkaloid biosynthesis	0.00626611	4	Prupe.6G068900, Prupe.6G069000, Prupe.6G069200, Prupe.6G069700
pper00592	alpha-Linolenic acid metabolism	0.0282719	5	Prupe.1G548600, Prupe.1G548800, Prupe.5G230200, Prupe.6G018700, Prupe.8G018400
pper00941	Flavonoid biosynthesis	0.0282719	4	Prupe.1G227100, Prupe.1G502300, Prupe.1G502500, Prupe.3G101500
pper00710	Carbon fixation in photosynthetic organisms	0.0320069	5	Prupe.3G157200, Prupe.4G102900, Prupe.4G136700, Prupe.5G008000, Prupe.7G165400

## Sheet: TNL_vs_TRL_KEGG
KEGG Pathway ID	Description	p.adjust	Count	Genes
pper00940	Phenylpropanoid biosynthesis	0.0190575	15	Prupe.2G199600, Prupe.3G097600, Prupe.3G101400, Prupe.3G219700, Prupe.4G021100, Prupe.6G013200, Prupe.6G013500, Prupe.6G044000, Prupe.6G192000, Prupe.6G223400, Prupe.7G079100, Prupe.7G173700, Prupe.8G038900, Prupe.8G130900, Prupe.8G165700
pper00480	Glutathione metabolism	0.0204665	12	Prupe.1G055000, Prupe.1G456300, Prupe.1G526000, Prupe.4G146000, Prupe.4G146100, Prupe.4G146200, Prupe.4G146400, Prupe.4G146800, Prupe.4G147200, Prupe.6G040700, Prupe.8G210400, Prupe.8G210500
pper04626	Plant-pathogen interaction	0.021968	15	Prupe.1G023600, Prupe.1G384400, Prupe.1G542800, Prupe.3G099200, Prupe.3G259100, Prupe.3G266000, Prupe.4G055500, Prupe.4G191200, Prupe.4G201800, Prupe.5G194800, Prupe.6G286000, Prupe.7G090800, Prupe.8G008700, Prupe.8G009000, Prupe.8G234000

## Sheet: TNR_vs_TRR_KEGG
KEGG Pathway ID	Description	p.adjust	Count	Genes
pper04141	Protein processing in endoplasmic reticulum	0.00490804	14	Prupe.1G237800, Prupe.1G407100, Prupe.1G586200, Prupe.2G243400, Prupe.2G243800, Prupe.2G301300, Prupe.3G017400, Prupe.3G102300, Prupe.4G125800, Prupe.6G065900, Prupe.6G066100, Prupe.6G066200, Prupe.7G265200, Prupe.8G000400
pper00480	Glutathione metabolism	0.00490804	10	Prupe.1G055900, Prupe.3G014500, Prupe.4G145900, Prupe.4G146000, Prupe.4G146200, Prupe.5G192500, Prupe.6G242200, Prupe.6G244700, Prupe.8G037800, Prupe.8G210400
pper00940	Phenylpropanoid biosynthesis	0.00949793	11	Prupe.1G227100, Prupe.1G580300, Prupe.2G320000, Prupe.3G101500, Prupe.6G013200, Prupe.6G013500, Prupe.6G018800, Prupe.6G044700, Prupe.6G162000, Prupe.6G192000, Prupe.6G223400
pper00941	Flavonoid biosynthesis	0.0214554	5	Prupe.1G227100, Prupe.1G502300, Prupe.1G502500, Prupe.1G580300, Prupe.3G101500
