# Supplementary material for: Morphological, Physiological, Biochemical, and Transcriptome Studies Reveal The Importance of Different Component Traits During Salinity Stress in Prunus
Source: Research Square preprint supplement (doi:10.21203/rs.3.rs-659140/v1), 2021-07-07
Supplement: Supplementary file 11 [file 4246947e398df2a70b2195ab.xlsx]

## Sheet: TNL_CNL
Supplementary Table S8.Differentially expressed genes (DEGs) involved in hormonal signaling.
ABA					BR					Cytokinin					Ethylene					Gibberellin					IAA					Jasmonate					Salicylic Acid
Gene_id	Pathway	description	logFC		Gene_id	Pathway	description	logFC		Gene_id	Pathway	description	logFC		Gene_id	Pathway	description	logFC		Gene_id	Pathway	description	logFC		Gene_id	Pathway	description	logFC		Gene_id	Pathway	description	logFC		Gene_id	Pathway	description	logFC
																														Prupe.7G141400	Hormone.Jasmonate	hydrolase activity, methyl indole-3-acetate esterase activity, methyl salicylate esterase activity, methyl jasmonate esterase activity, jasmonic acid metabolic process, salicylic acid metabolic process	2.97378		Prupe.7G141400	Hormone.Salicylic Acid	hydrolase activity, methyl indole-3-acetate esterase activity, methyl salicylate esterase activity, methyl jasmonate esterase activity, jasmonic acid metabolic process, salicylic acid metabolic process	2.97378

## Sheet: TRL_CRL
ABA					BR					Cytokinin					Ethylene					Gibberellin					IAA					Jasmonate					Salicylic Acid
Gene_id	Pathway	description	logFC		Gene_id	Pathway	description	logFC		Gene_id	Pathway	description	logFC		Gene_id	Pathway	description	logFC		Gene_id	Pathway	description	logFC		Gene_id	Pathway	description	logFC		Gene_id	Pathway	description	logFC		Gene_id	Pathway	description	logFC

## Sheet: TNR_CNR
ABA					BR					Cytokinin					Ethylene					Gibberellin					IAA					Jasmonate					Salicylic Acid
Gene_id	Pathway	description	logFC		Gene_id	Pathway	description	logFC		Gene_id	Pathway	description	logFC		Gene_id	Pathway	description	logFC		Gene_id	Pathway	description	logFC		Gene_id	Pathway	description	logFC		Gene_id	Pathway	description	logFC		Gene_id	Pathway	description	logFC
																									Prupe.1G356000	Hormone.IAA	membrane, integral component of membrane, auxin-activated signaling pathway, transmembrane transport, plasma membrane, symporter activity, amino acid transport	3.10253		Prupe.6G040000	Hormone.Jasmonate	, methyl indole-3-acetate esterase activity, methyl salicylate esterase activity, methyl jasmonate esterase activity, jasmonic acid metabolic process, salicylic acid metabolic process	-2.14559		Prupe.6G354100	Hormone.Salicylic Acid	hydrolase activity, acting on ester bonds, response to lithium ion, hyperosmotic salinity response, response to salicylic acid	-27.78
																									Prupe.6G360300	Hormone.IAA	transmembrane transport, membrane, integral component of membrane, auxin-activated signaling pathway, endoplasmic reticulum, plasma membrane, auxin polar transport, auxin efflux transmembrane transporter activity, auxin homeostasis, auxin efflux, auxin transmembrane transporter activity, pollen development, intracellular auxin transport	-2.18484							Prupe.6G040000	Hormone.Salicylic Acid	, methyl indole-3-acetate esterase activity, methyl salicylate esterase activity, methyl jasmonate esterase activity, jasmonic acid metabolic process, salicylic acid metabolic process	-2.14559

## Sheet: TRR_CRR
ABA					BR					Cytokinin					Ethylene					Gibberellin					IAA					Jasmonate					Salicylic Acid
Gene_id	Pathway	description	logFC		Gene_id	Pathway	description	logFC		Gene_id	Pathway	description	logFC		Gene_id	Pathway	description	logFC		Gene_id	Pathway	description	logFC		Gene_id	Pathway	description	logFC		Gene_id	Pathway	description	logFC		Gene_id	Pathway	description	logFC

## Sheet: CNL_CRL
ABA					BR					Cytokinin					Ethylene					Gibberellin					IAA					Jasmonate					Salicylic Acid
Gene_id	Pathway	description	logFC		Gene_id	Pathway	description	logFC		Gene_id	Pathway	description	logFC		Gene_id	Pathway	description	logFC		Gene_id	Pathway	description	logFC		Gene_id	Pathway	description	logFC		Gene_id	Pathway	description	logFC		Gene_id	Pathway	description	logFC
Prupe.1G480500	Hormone.ABA	catalytic activity, hydrolase activity, calcium ion binding, membrane, phospholipase D activity, N-acylphosphatidylethanolamine-specific phospholipase D activity, lipid catabolic process, phosphatidylcholine metabolic process, plasma membrane, phospholipid catabolic process, response to water deprivation, response to salt stress, response to abscisic acid, membrane lipid catabolic process	-3.77493		Prupe.7G264200	Hormone.BR	hydrolase activity, peptidase activity, proteolysis, extracellular region, serine-type carboxypeptidase activity, carboxypeptidase activity, extracellular space, brassinosteroid mediated signaling pathway	-3.32451		Prupe.3G143800	Hormone.Cytokinin	regulation of transcription, DNA-templated, sequence-specific DNA binding, nucleic acid binding, trichome differentiation, gibberellic acid mediated signaling pathway, cytokinin-activated signaling pathway, cytosolic ribosome, negative regulation of abscisic acid-activated signaling pathway, GO_0044212, DNA-binding transcription factor activity, nucleus, transcription regulatory region sequence-s…	4.6931		Prupe.4G276500	Hormone.Ethylene	nucleus, lipid metabolic process, hydrolase activity, defense response to Gram-negative bacterium, cytoplasm, negative regulation of ethylene-activated signaling pathway, leaf senescence, negative regulation of defense response, regulation of jasmonic acid mediated signaling pathway, positive regulation of camalexin biosynthetic process, positive regulation of defense response to bacterium, posit…	3.26374		Prupe.1G388500	Hormone.Gibberellin	oxidation-reduction process, oxidoreductase activity, membrane, integral component of membrane, metal ion binding, monooxygenase activity, iron ion binding, oxidoreductase activity, acting on paired donors, with incorporation or reduction of molecular oxygen, heme binding, endoplasmic reticulum, chloroplast outer membrane, gibberellin biosynthetic process, ent-kaurene oxidation to kaurenoic acid,…	-2.06104		Prupe.3G043400	Hormone.IAA	plasma membrane, membrane, auxin-activated signaling pathway	-2.76821		Prupe.7G141300	Hormone.Jasmonate	hydrolase activity, methyl indole-3-acetate esterase activity, methyl salicylate esterase activity, methyl jasmonate esterase activity, jasmonic acid metabolic process, salicylic acid metabolic process	5.29736		Prupe.4G276500	Hormone.Salicylic Acid	nucleus, lipid metabolic process, hydrolase activity, defense response to Gram-negative bacterium, cytoplasm, negative regulation of ethylene-activated signaling pathway, leaf senescence, negative regulation of defense response, regulation of jasmonic acid mediated signaling pathway, positive regulation of camalexin biosynthetic process, positive regulation of defense response to bacterium, posit…	3.26374
Prupe.1G446400	Hormone.ABA	cytoplasm, plasma membrane, membrane, negative regulation of phosphoprotein phosphatase activity, nucleus, signaling receptor activity, abscisic acid-activated signaling pathway, protein phosphatase inhibitor activity, abscisic acid binding, regulation of protein serine/threonine phosphatase activity	3.32838		Prupe.6G065400	Hormone.BR	plasma membrane, ATP binding, membrane, protein kinase activity, protein phosphorylation, brassinosteroid mediated signaling pathway, protein binding	2.82715		Prupe.7G208500	Hormone.Cytokinin	catalytic activity, oxidoreductase activity, oxidation-reduction process, flavin adenine dinucleotide binding, FAD binding, cytokinin dehydrogenase activity, cytokinin metabolic process	4.35396		Prupe.7G231200	Hormone.Ethylene	oxidation-reduction process, oxidoreductase activity, flavin adenine dinucleotide binding, monooxygenase activity, NADP binding, N,N-dimethylaniline monooxygenase activity, response to ethylene, auxin biosynthetic process	-6.01816		Prupe.6G196000	Hormone.Gibberellin	nucleus, DNA binding, regulation of transcription, DNA-templated, regulation of gibberellin biosynthetic process, seed maturation, DNA-binding transcription factor activity, transcription regulatory region sequence-specific DNA binding	-2.36159		Prupe.1G491000	Hormone.IAA	membrane, integral component of membrane, auxin-activated signaling pathway, transmembrane transport, plasma membrane, symporter activity, amino acid transport	-3.69923		Prupe.7G142200	Hormone.Jasmonate	hydrolase activity, methyl indole-3-acetate esterase activity, methyl salicylate esterase activity, methyl jasmonate esterase activity, jasmonic acid metabolic process, salicylic acid metabolic process,	-2.53755		Prupe.3G135700	Hormone.Salicylic Acid	membrane, integral component of membrane, regulation of defense response, cellular response to salicylic acid stimulus, regulation of salicylic acid mediated signaling pathway, protein binding	-3.19202
Prupe.1G515200	Hormone.ABA	calcium ion binding, calcium-dependent phospholipid binding, cellular oxidant detoxification, cytoplasm, peroxidase activity, ATP binding, zinc ion binding, protein homodimerization activity, response to osmotic stress, response to heat, response to cold, response to water deprivation, response to salt stress, response to abscisic acid, response to cadmium ion, calcium ion transmembrane transport…	-2.87179		Prupe.7G158700	Hormone.BR	oxidation-reduction process, oxidoreductase activity, membrane, integral component of membrane, metal ion binding, monooxygenase activity, iron ion binding, oxidoreductase activity, acting on paired donors, with incorporation or reduction of molecular oxygen, heme binding, multicellular organism development, sterol metabolic process, brassinosteroid homeostasis, brassinosteroid biosynthetic proce…	-2.60612		Prupe.8G131900	Hormone.Cytokinin	cell cycle, cell division, nucleus, response to sucrose, seed development, guard mother cell differentiation, G1/S transition of mitotic cell cycle, response to cytokinin, cytoplasm, regulation of cyclin-dependent protein serine/threonine kinase activity, cyclin-dependent protein kinase holoenzyme complex, cyclin-dependent protein serine/threonine kinase regulator activity, mitotic cell cycle pha…	-4.42849							Prupe.1G467600	Hormone.Gibberellin	oxidation-reduction process, oxidoreductase activity, metal ion binding, dioxygenase activity, response to light stimulus, gibberellin biosynthetic process, gibberellin 3-beta-dioxygenase activity	7.64884		Prupe.2G213000	Hormone.IAA	nucleus, DNA binding, regulation of transcription, DNA-templated, auxin-activated signaling pathway, response to hormone, transcription, DNA-templated, protein binding, pattern specification process, response to auxin, root cap development, cell division	-2.91647		Prupe.7G141000	Hormone.Jasmonate	hydrolase activity, methyl indole-3-acetate esterase activity, methyl salicylate esterase activity, methyl jasmonate esterase activity, jasmonic acid metabolic process, salicylic acid metabolic process	5.83101		Prupe.3G135100	Hormone.Salicylic Acid	membrane, integral component of membrane, regulation of defense response, cellular response to salicylic acid stimulus, regulation of salicylic acid mediated signaling pathway, protein binding	-9.21482
Prupe.6G062500	Hormone.ABA	ATP binding, nucleotide binding, kinase activity, phosphorylation, transferase activity, protein kinase activity, protein phosphorylation, protein serine/threonine kinase activity, calmodulin-dependent protein kinase activity, calmodulin binding, response to cold, response to salt stress, response to abscisic acid, response to hydrogen peroxide	2.30894		Prupe.5G091700	Hormone.BR	nucleus, positive regulation of brassinosteroid mediated signaling pathway, DNA-binding transcription factor activity, sequence-specific DNA binding, regulation of transcription, DNA-templated	-3.68989		Prupe.6G103900	Hormone.Cytokinin	hydrolase activity, cytokinin biosynthetic process, nucleus, cytosol, hydrolase activity, hydrolyzing N-glycosyl compounds	-4.58542							Prupe.4G080700	Hormone.Gibberellin	oxidation-reduction process, oxidoreductase activity, metal ion binding, dioxygenase activity, response to light stimulus, C-19 gibberellin 2-beta-dioxygenase activity, gibberellin catabolic process	-2.50849		Prupe.3G300900	Hormone.IAA	membrane, integral component of membrane, auxin-activated signaling pathway, transmembrane transport, plasma membrane, symporter activity, amino acid transport	2.31596		Prupe.7G141200	Hormone.Jasmonate	hydrolase activity, methyl indole-3-acetate esterase activity, methyl salicylate esterase activity, methyl jasmonate esterase activity, jasmonic acid metabolic process, salicylic acid metabolic process	3.47119		Prupe.4G145300	Hormone.Salicylic Acid	membrane, integral component of membrane, regulation of defense response, cellular response to salicylic acid stimulus, regulation of salicylic acid mediated signaling pathway, protein binding	3.87959
Prupe.3G143800	Hormone.ABA	regulation of transcription, DNA-templated, sequence-specific DNA binding, nucleic acid binding, trichome differentiation, gibberellic acid mediated signaling pathway, cytokinin-activated signaling pathway, cytosolic ribosome, negative regulation of abscisic acid-activated signaling pathway, GO_0044212, DNA-binding transcription factor activity, nucleus, transcription regulatory region sequence-s…	4.6931		Prupe.5G041700	Hormone.BR	ATP binding, protein kinase activity, protein phosphorylation, brassinosteroid mediated signaling pathway, protein binding, plasma membrane, membrane	-2.05829		Prupe.6G123100	Hormone.Cytokinin	phosphorelay signal transduction system, intracellular, cytokinin-activated signaling pathway, cytosol, protein phosphorylation, nucleus, positive regulation of cytokinin-activated signaling pathway, cytoplasm, phosphorylation, histidine phosphotransfer kinase activity, protein histidine kinase binding	6.40395							Prupe.3G006700	Hormone.Gibberellin	oxidation-reduction process, oxidoreductase activity, metal ion binding, dioxygenase activity, response to light stimulus, C-19 gibberellin 2-beta-dioxygenase activity, gibberellin catabolic process	4.75282		Prupe.1G413900	Hormone.IAA	membrane, integral component of membrane, regulation of auxin polar transport, response to cold, response to abscisic acid, response to jasmonic acid	-3.01633		Prupe.8G115000	Hormone.Jasmonate	hydrolase activity, methyl indole-3-acetate esterase activity, methyl salicylate esterase activity, methyl jasmonate esterase activity, jasmonic acid metabolic process, salicylic acid metabolic process	2.91501		Prupe.5G223600	Hormone.Salicylic Acid	regulation of transcription, DNA-templated, calmodulin binding, DNA-binding transcription factor activity, sequence-specific DNA binding, nucleus, regulation of salicylic acid biosynthetic process	2.73563
Prupe.1G128700	Hormone.ABA	defense response, response to biotic stimulus, protein phosphatase inhibitor activity, abscisic acid-activated signaling pathway, negative regulation of phosphoprotein phosphatase activity, abscisic acid binding, signaling receptor activity, nucleus, cytoplasm, regulation of protein serine/threonine phosphatase activity	2.17148		Prupe.8G087900	Hormone.BR	zinc ion binding, intracellular, sequence-specific DNA binding, positive regulation of photomorphogenesis, negative regulation of brassinosteroid mediated signaling pathway, response to chitin, response to brassinosteroid, response to karrikin, nucleus, regulation of transcription, DNA-templated, photomorphogenesis	-2.25267		Prupe.7G208400	Hormone.Cytokinin	catalytic activity, oxidoreductase activity, oxidation-reduction process, flavin adenine dinucleotide binding, FAD binding, cytokinin dehydrogenase activity, cytokinin metabolic process	2.69961												Prupe.1G388700	Hormone.IAA	membrane, integral component of membrane, auxin-activated signaling pathway, transmembrane transport, plasma membrane, symporter activity, amino acid transport	-3.42037							Prupe.7G141300	Hormone.Salicylic Acid	hydrolase activity, methyl indole-3-acetate esterase activity, methyl salicylate esterase activity, methyl jasmonate esterase activity, jasmonic acid metabolic process, salicylic acid metabolic process	5.29736
Prupe.1G413900	Hormone.ABA	membrane, integral component of membrane, regulation of auxin polar transport, response to cold, response to abscisic acid, response to jasmonic acid	-3.01633		Prupe.2G108600	Hormone.BR	oxidation-reduction process, oxidoreductase activity, metal ion binding, monooxygenase activity, iron ion binding, oxidoreductase activity, acting on paired donors, with incorporation or reduction of molecular oxygen, heme binding, multicellular organism development, endoplasmic reticulum, sterol metabolic process, brassinosteroid homeostasis, brassinosteroid biosynthetic process, ent-kaurenoate …	4.60876		Prupe.1G260700	Hormone.Cytokinin	regulation of transcription, DNA-templated, nucleic acid binding, DNA-binding transcription factor activity, nucleus, transcription regulatory region sequence-specific DNA binding, cytokinin-activated signaling pathway, gibberellic acid mediated signaling pathway, trichome differentiation	3.40071												Prupe.1G221300	Hormone.IAA	response to auxin	-3.80959							Prupe.7G142200	Hormone.Salicylic Acid	hydrolase activity, methyl indole-3-acetate esterase activity, methyl salicylate esterase activity, methyl jasmonate esterase activity, jasmonic acid metabolic process, salicylic acid metabolic process,	-2.53755
Prupe.3G289900	Hormone.ABA	carbohydrate metabolic process, galactinol-sucrose galactosyltransferase activity, response to oxidative stress, response to water deprivation, response to abscisic acid, chloroplast	2.52367		Prupe.8G026100	Hormone.BR	oxidation-reduction process, oxidoreductase activity, metal ion binding, monooxygenase activity, iron ion binding, oxidoreductase activity, acting on paired donors, with incorporation or reduction of molecular oxygen, heme binding, multicellular organism development, sterol metabolic process, brassinosteroid homeostasis, brassinosteroid biosynthetic process	3.10988																	Prupe.1G356000	Hormone.IAA	membrane, integral component of membrane, auxin-activated signaling pathway, transmembrane transport, plasma membrane, symporter activity, amino acid transport	4.41199							Prupe.4G203500	Hormone.Salicylic Acid	membrane, integral component of membrane, regulation of defense response, cellular response to salicylic acid stimulus, regulation of salicylic acid mediated signaling pathway, protein binding	3.7709
Prupe.2G294400	Hormone.ABA	response to abscisic acid	-2.4393																						Prupe.2G036500	Hormone.IAA	nucleus, auxin-activated signaling pathway, multicellular organism development, auxin biosynthetic process, DNA binding, positive regulation of transcription, DNA-templated	-3.21606							Prupe.3G155300	Hormone.Salicylic Acid	membrane, integral component of membrane, regulation of defense response, cellular response to salicylic acid stimulus, regulation of salicylic acid mediated signaling pathway, protein binding	-6.64986
Prupe.1G384600	Hormone.ABA	hydrolase activity, phosphatidylinositol dephosphorylation, phosphatidylinositol-3-phosphate biosynthetic process, response to salt stress, plasma membrane, phosphatidylinositol-4,5-bisphosphate 5-phosphatase activity, phosphatidylinositol-3,4,5-trisphosphate 5-phosphatase activity, response to abscisic acid, response to auxin, inositol phosphate dephosphorylation, response to jasmonic acid, phos…	4.55952																						Prupe.1G287400	Hormone.IAA	nucleus, membrane, integral component of membrane, regulation of transcription, DNA-templated, auxin-activated signaling pathway, transcription, DNA-templated	5.69855							Prupe.6G354100	Hormone.Salicylic Acid	hydrolase activity, acting on ester bonds, response to lithium ion, hyperosmotic salinity response, response to salicylic acid	-26.0044
Prupe.7G112200	Hormone.ABA	nucleus, regulation of transcription, DNA-templated, DNA-binding transcription factor activity, response to abscisic acid, positive regulation of transcription, DNA-templated	-2.74023																						Prupe.3G035000	Hormone.IAA	response to auxin	-2.62397							Prupe.4G203600	Hormone.Salicylic Acid	membrane, integral component of membrane, regulation of defense response, cellular response to salicylic acid stimulus, regulation of salicylic acid mediated signaling pathway, protein binding	3.64066
Prupe.1G258100	Hormone.ABA	defense response, response to biotic stimulus, protein phosphatase inhibitor activity, abscisic acid-activated signaling pathway, negative regulation of phosphoprotein phosphatase activity, abscisic acid binding, signaling receptor activity	-7.1964																						Prupe.5G004300	Hormone.IAA	transmembrane transport, membrane, integral component of membrane, auxin-activated signaling pathway	-4.05774							Prupe.7G141000	Hormone.Salicylic Acid	hydrolase activity, methyl indole-3-acetate esterase activity, methyl salicylate esterase activity, methyl jasmonate esterase activity, jasmonic acid metabolic process, salicylic acid metabolic process	5.83101
Prupe.1G127500	Hormone.ABA	defense response, response to biotic stimulus, protein phosphatase inhibitor activity, abscisic acid-activated signaling pathway, negative regulation of phosphoprotein phosphatase activity, abscisic acid binding, signaling receptor activity, nucleus, cytoplasm, regulation of protein serine/threonine phosphatase activity	5.94754																						Prupe.3G170800	Hormone.IAA	dTDP-glucose 4,6-dehydratase activity, nucleotide-sugar metabolic process, auxin efflux, UDP-rhamnose biosynthetic process, UDP-L-rhamnose synthase activity, UDP-glucose 4,6-dehydratase activity, flavonol biosynthetic process	-3.02234							Prupe.3G155200	Hormone.Salicylic Acid	integral component of membrane, regulation of defense response, cellular response to salicylic acid stimulus, regulation of salicylic acid mediated signaling pathway, protein binding	-6.39223
Prupe.7G161200	Hormone.ABA	response to water, cytosol, response to water deprivation, cold acclimation, response to abscisic acid	2.69777																						Prupe.1G384600	Hormone.IAA	hydrolase activity, phosphatidylinositol dephosphorylation, phosphatidylinositol-3-phosphate biosynthetic process, response to salt stress, plasma membrane, phosphatidylinositol-4,5-bisphosphate 5-phosphatase activity, phosphatidylinositol-3,4,5-trisphosphate 5-phosphatase activity, response to abscisic acid, response to auxin, inositol phosphate dephosphorylation, response to jasmonic acid, phos…	4.55952							Prupe.7G141200	Hormone.Salicylic Acid	hydrolase activity, methyl indole-3-acetate esterase activity, methyl salicylate esterase activity, methyl jasmonate esterase activity, jasmonic acid metabolic process, salicylic acid metabolic process	3.47119
Prupe.6G094400	Hormone.ABA	defense response, response to biotic stimulus, protein phosphatase inhibitor activity, abscisic acid-activated signaling pathway, negative regulation of phosphoprotein phosphatase activity, abscisic acid binding, signaling receptor activity, nucleus, cytoplasm, regulation of protein serine/threonine phosphatase activity	5.79847																						Prupe.7G185200	Hormone.IAA	transmembrane transport, membrane, integral component of membrane, auxin-activated signaling pathway	-2.44822							Prupe.4G144900	Hormone.Salicylic Acid	membrane, integral component of membrane, regulation of defense response, cellular response to salicylic acid stimulus, regulation of salicylic acid mediated signaling pathway, protein binding	-4.34906
Prupe.1G127800	Hormone.ABA	defense response, response to biotic stimulus, protein phosphatase inhibitor activity, abscisic acid-activated signaling pathway, negative regulation of phosphoprotein phosphatase activity, abscisic acid binding, signaling receptor activity, nucleus, cytoplasm, regulation of protein serine/threonine phosphatase activity	2.49166																						Prupe.7G163600	Hormone.IAA	nucleus, auxin-activated signaling pathway, multicellular organism development, auxin biosynthetic process, DNA binding, positive regulation of transcription, DNA-templated	-2.3077							Prupe.8G115000	Hormone.Salicylic Acid	hydrolase activity, methyl indole-3-acetate esterase activity, methyl salicylate esterase activity, methyl jasmonate esterase activity, jasmonic acid metabolic process, salicylic acid metabolic process	2.91501
Prupe.8G265500	Hormone.ABA	defense response, response to biotic stimulus, protein phosphatase inhibitor activity, abscisic acid-activated signaling pathway, negative regulation of phosphoprotein phosphatase activity, abscisic acid binding, signaling receptor activity, nucleus, cytoplasm, regulation of protein serine/threonine phosphatase activity	2.62337																						Prupe.5G233100	Hormone.IAA	transmembrane transport, membrane, integral component of membrane, auxin-activated signaling pathway, endoplasmic reticulum, plasma membrane, auxin polar transport, auxin efflux transmembrane transporter activity, auxin homeostasis, auxin efflux	-2.25252							Prupe.4G202900	Hormone.Salicylic Acid	membrane, integral component of membrane, regulation of defense response, cellular response to salicylic acid stimulus, regulation of salicylic acid mediated signaling pathway, protein binding	3.23851
Prupe.3G005100	Hormone.ABA	cytoplasm, transferase activity, carbohydrate metabolic process, galactose metabolic process, transferase activity, transferring glycosyl groups, inositol 3-alpha-galactosyltransferase activity, response to heat, response to abscisic acid, response to salt stress, response to water deprivation, response to high light intensity, response to hydrogen peroxide, response to cold	-3.68478																						Prupe.1G491300	Hormone.IAA	membrane, integral component of membrane, auxin-activated signaling pathway, transmembrane transport, plasma membrane, symporter activity, amino acid transport	-2.44877
Prupe.1G127900	Hormone.ABA	defense response, response to biotic stimulus, protein phosphatase inhibitor activity, abscisic acid-activated signaling pathway, negative regulation of phosphoprotein phosphatase activity, abscisic acid binding, signaling receptor activity, nucleus, cytoplasm, regulation of protein serine/threonine phosphatase activity	2.06575																						Prupe.7G200200	Hormone.IAA	manganese ion binding, metal ion binding, extracellular region, nutrient reservoir activity, cell wall, apoplast, auxin-activated signaling pathway	-10.9396
Prupe.1G127400	Hormone.ABA	defense response, response to biotic stimulus, protein phosphatase inhibitor activity, abscisic acid-activated signaling pathway, negative regulation of phosphoprotein phosphatase activity, abscisic acid binding, signaling receptor activity, nucleus, cytoplasm, regulation of protein serine/threonine phosphatase activity	3.93057																						Prupe.1G371500	Hormone.IAA	nucleus, auxin-activated signaling pathway, multicellular organism development, auxin biosynthetic process, DNA binding, positive regulation of transcription, DNA-templated	-2.79109
Prupe.1G378200	Hormone.ABA	nucleus, DNA binding, DNA-binding transcription factor activity, sequence-specific DNA binding, protein homodimerization activity, positive regulation of transcription, DNA-templated, response to abscisic acid, transcription regulatory region sequence-specific DNA binding, regulation of transcription, DNA-templated	-5.69976																						Prupe.8G082100	Hormone.IAA	response to auxin	-3.94372
Prupe.1G127700	Hormone.ABA	defense response, response to biotic stimulus, protein phosphatase inhibitor activity, abscisic acid-activated signaling pathway, negative regulation of phosphoprotein phosphatase activity, abscisic acid binding, signaling receptor activity, nucleus, cytoplasm, regulation of protein serine/threonine phosphatase activity	2.03035																						Prupe.7G231200	Hormone.IAA	oxidation-reduction process, oxidoreductase activity, flavin adenine dinucleotide binding, monooxygenase activity, NADP binding, N,N-dimethylaniline monooxygenase activity, response to ethylene, auxin biosynthetic process	-6.01816
Prupe.1G128400	Hormone.ABA	defense response, response to biotic stimulus, protein phosphatase inhibitor activity, abscisic acid-activated signaling pathway, negative regulation of phosphoprotein phosphatase activity, abscisic acid binding, signaling receptor activity, nucleus, cytoplasm, regulation of protein serine/threonine phosphatase activity	3.13128																						Prupe.7G100000	Hormone.IAA	hydrolase activity, endoplasmic reticulum, IAA-Ala conjugate hydrolase activity, auxin metabolic process	-2.27164
Prupe.1G127300	Hormone.ABA	defense response, response to biotic stimulus, protein phosphatase inhibitor activity, abscisic acid-activated signaling pathway, negative regulation of phosphoprotein phosphatase activity, abscisic acid binding, signaling receptor activity, nucleus, cytoplasm, regulation of protein serine/threonine phosphatase activity	2.79344																						Prupe.7G031400	Hormone.IAA	transmembrane transport, membrane, integral component of membrane, auxin-activated signaling pathway, endoplasmic reticulum, plasma membrane, auxin polar transport, auxin efflux transmembrane transporter activity, auxin homeostasis, auxin efflux	-2.06155
Prupe.6G280200	Hormone.ABA	cytosol, response to abscisic acid	-4.60479																						Prupe.8G078800	Hormone.IAA	response to auxin	2.80013
Prupe.1G129000	Hormone.ABA	defense response, response to biotic stimulus, protein phosphatase inhibitor activity, abscisic acid-activated signaling pathway, negative regulation of phosphoprotein phosphatase activity, abscisic acid binding, signaling receptor activity, nucleus, cytoplasm, regulation of protein serine/threonine phosphatase activity	2.82392																						Prupe.7G200300	Hormone.IAA	manganese ion binding, metal ion binding, extracellular region, nutrient reservoir activity, cell wall, apoplast, auxin-activated signaling pathway	-4.34408
Prupe.1G127200	Hormone.ABA	defense response, response to biotic stimulus, protein phosphatase inhibitor activity, abscisic acid-activated signaling pathway, negative regulation of phosphoprotein phosphatase activity, abscisic acid binding, signaling receptor activity, nucleus, cytoplasm, regulation of protein serine/threonine phosphatase activity	2.26607																						Prupe.7G200100	Hormone.IAA	manganese ion binding, metal ion binding, extracellular region, nutrient reservoir activity, cell wall, apoplast, auxin-activated signaling pathway	-3.20016
																									Prupe.8G163100	Hormone.IAA	membrane, integral component of membrane, auxin-activated signaling pathway, transmembrane transport, plasma membrane, symporter activity, amino acid transport	-5.73935
																									Prupe.8G080100	Hormone.IAA	response to auxin	-8.54384
																									Prupe.1G367800	Hormone.IAA	response to auxin	-2.51246
																									Prupe.1G222800	Hormone.IAA	regulation of auxin polar transport, gravitropism	2.02126
																									Prupe.4G277700	Hormone.IAA	membrane, integral component of membrane, auxin-activated signaling pathway, transmembrane transport, plasma membrane, symporter activity, amino acid transport	-3.27437
																									Prupe.1G491100	Hormone.IAA	membrane, integral component of membrane, auxin-activated signaling pathway, transmembrane transport, plasma membrane, symporter activity, amino acid transport	-5.58651
																									Prupe.8G018200	Hormone.IAA	transmembrane transport, membrane, integral component of membrane, auxin-activated signaling pathway, endoplasmic reticulum, plasma membrane, auxin polar transport, auxin efflux transmembrane transporter activity, auxin homeostasis, auxin efflux	-5.198
																									Prupe.8G079200	Hormone.IAA	response to auxin	-3.56927
																									Prupe.3G001800	Hormone.IAA	nucleus, regulation of transcription, DNA-templated, auxin-activated signaling pathway, transcription, DNA-templated, protein binding	-3.155
																									Prupe.4G137000	Hormone.IAA	membrane, integral component of membrane, auxin-activated signaling pathway, transmembrane transport, vacuolar membrane, plasma membrane, symporter activity, amino acid transport	-5.27059
																									Prupe.8G235800	Hormone.IAA	, phloem or xylem histogenesis, leaf vascular tissue pattern formation, auxin-activated signaling pathway, response to auxin	-2.34147
																									Prupe.1G208300	Hormone.IAA	nucleus, regulation of transcription, DNA-templated, auxin-activated signaling pathway, transcription, DNA-templated, protein binding, identical protein binding, gravitropism, root development, shoot system development	-2.18624
																									Prupe.7G203200	Hormone.IAA	plasma membrane, membrane, integral component of membrane, auxin-activated signaling pathway	-3.68554
																									Prupe.1G233800	Hormone.IAA	membrane, integral component of membrane, auxin-activated signaling pathway, transmembrane transport, plasma membrane, symporter activity, amino acid transport	3.56868
																									Prupe.3G035100	Hormone.IAA	response to auxin	-2.1329
																									Prupe.7G104000	Hormone.IAA	response to auxin	3.57853
																									Prupe.1G444800	Hormone.IAA	membrane, integral component of membrane, auxin-activated signaling pathway, transmembrane transport, plasma membrane, symporter activity, amino acid transport	-2.10475
																									Prupe.7G192600	Hormone.IAA	response to auxin, nucleus, cytoplasm, extrinsic component of plasma membrane, positive regulation of cell growth	-2.14353
																									Prupe.8G081100	Hormone.IAA	response to auxin	-2.04168

## Sheet: TNL_TRL
ABA					BR					Cytokinin					Ethylene					Gibberellin					IAA					Jasmonate					Salicylic Acid
Gene_id	Pathway	description	logFC		Gene_id	Pathway	description	logFC		Gene_id	Pathway	description	logFC		Gene_id	Pathway	description	logFC		Gene_id	Pathway	description	logFC		Gene_id	Pathway	description	logFC		Gene_id	Pathway	description	logFC		Gene_id	Pathway	description	logFC
Prupe.1G446400	Hormone.ABA	cytoplasm, plasma membrane, membrane, negative regulation of phosphoprotein phosphatase activity, nucleus, signaling receptor activity, abscisic acid-activated signaling pathway, protein phosphatase inhibitor activity, abscisic acid binding, regulation of protein serine/threonine phosphatase activity	4.99886		Prupe.7G264200	Hormone.BR	hydrolase activity, peptidase activity, proteolysis, extracellular region, serine-type carboxypeptidase activity, carboxypeptidase activity, extracellular space, brassinosteroid mediated signaling pathway	-2.01167		Prupe.6G332500	Hormone.Cytokinin	cytosol, phosphorelay signal transduction system, protein phosphorylation, intracellular, nucleus, cytoplasm, phosphorylation, histidine phosphotransfer kinase activity, protein histidine kinase binding, cytokinin-activated signaling pathway	-2.57085		Prupe.4G276500	Hormone.Cytokinin	nucleus, lipid metabolic process, hydrolase activity, defense response to Gram-negative bacterium, cytoplasm, negative regulation of ethylene-activated signaling pathway, leaf senescence, negative regulation of defense response, regulation of jasmonic acid mediated signaling pathway, positive regulation of camalexin biosynthetic process, positive regulation of defense response to bacterium, posit…	2.41915		Prupe.1G388500	Hormone.Giberellin	oxidation-reduction process, oxidoreductase activity, membrane, integral component of membrane, metal ion binding, monooxygenase activity, iron ion binding, oxidoreductase activity, acting on paired donors, with incorporation or reduction of molecular oxygen, heme binding, endoplasmic reticulum, chloroplast outer membrane, gibberellin biosynthetic process, ent-kaurene oxidation to kaurenoic acid,…	-2.12356		Prupe.1G491000	Hormone.IAA	membrane, integral component of membrane, auxin-activated signaling pathway, transmembrane transport, plasma membrane, symporter activity, amino acid transport	-4.01298		Prupe.7G141400	Hormone.Jasmonate	methyl indole-3-acetate esterase activity, methyl salicylate esterase activity, methyl jasmonate esterase activity, jasmonic acid metabolic process, salicylic acid metabolic process	3.9152		Prupe.6G354100	Hormone.Salicylic Acid	hydrolase activity, acting on ester bonds, response to lithium ion, hyperosmotic salinity response, response to salicylic acid	-33.3018
Prupe.6G062500	Hormone.ABA	ATP binding, nucleotide binding, kinase activity, phosphorylation, transferase activity, protein kinase activity, protein phosphorylation, protein serine/threonine kinase activity, calmodulin-dependent protein kinase activity, calmodulin binding, response to cold, response to salt stress, response to abscisic acid, response to hydrogen peroxide	2.29545		Prupe.8G177300	Hormone.BR	oxidation-reduction process, oxidoreductase activity, membrane, integral component of membrane, metal ion binding, monooxygenase activity, iron ion binding, oxidoreductase activity, acting on paired donors, with incorporation or reduction of molecular oxygen, heme binding, multicellular organism development, sterol metabolic process, brassinosteroid homeostasis, brassinosteroid biosynthetic proce…	-2.33148		Prupe.7G208500	Hormone.Cytokinin	catalytic activity, oxidoreductase activity, oxidation-reduction process, flavin adenine dinucleotide binding, FAD binding, cytokinin dehydrogenase activity, cytokinin metabolic process	3.56749							Prupe.6G196000	Hormone.Giberellin	nucleus, DNA binding, regulation of transcription, DNA-templated, regulation of gibberellin biosynthetic process, seed maturation, DNA-binding transcription factor activity, transcription regulatory region sequence-specific DNA binding	-2.8922		Prupe.3G043400	Hormone.IAA	plasma membrane, membrane, auxin-activated signaling pathway	-2.82757		Prupe.7G141300	Hormone.Jasmonate	methyl indole-3-acetate esterase activity, methyl salicylate esterase activity, methyl jasmonate esterase activity, jasmonic acid metabolic process, salicylic acid metabolic process	3.22795		Prupe.3G135700	Hormone.Salicylic Acid	membrane, integral component of membrane, regulation of defense response, cellular response to salicylic acid stimulus, regulation of salicylic acid mediated signaling pathway, protein binding	-3.47586
Prupe.2G294400	Hormone.ABA	response to abscisic acid	-2.64318		Prupe.8G026100	Hormone.BR	oxidation-reduction process, oxidoreductase activity, metal ion binding, monooxygenase activity, iron ion binding, oxidoreductase activity, acting on paired donors, with incorporation or reduction of molecular oxygen, heme binding, multicellular organism development, sterol metabolic process, brassinosteroid homeostasis, brassinosteroid biosynthetic process	5.63711		Prupe.1G260700	Hormone.Cytokinin	regulation of transcription, DNA-templated, nucleic acid binding, DNA-binding transcription factor activity, nucleus, transcription regulatory region sequence-specific DNA binding, cytokinin-activated signaling pathway, gibberellic acid mediated signaling pathway, trichome differentiation	4.46295							Prupe.4G080700	Hormone.Giberellin	oxidation-reduction process, oxidoreductase activity, metal ion binding, dioxygenase activity, response to light stimulus, C-19 gibberellin 2-beta-dioxygenase activity, gibberellin catabolic process	-3.03995		Prupe.5G004300	Hormone.IAA	transmembrane transport, membrane, integral component of membrane, auxin-activated signaling pathway	-6.29844							Prupe.4G276500	Hormone.Salicylic Acid	nucleus, lipid metabolic process, hydrolase activity, defense response to Gram-negative bacterium, cytoplasm, negative regulation of ethylene-activated signaling pathway, leaf senescence, negative regulation of defense response, regulation of jasmonic acid mediated signaling pathway, positive regulation of camalexin biosynthetic process, positive regulation of defense response to bacterium, posit…	2.41915
Prupe.7G112200	Hormone.ABA	nucleus, regulation of transcription, DNA-templated, DNA-binding transcription factor activity, response to abscisic acid, positive regulation of transcription, DNA-templated	-2.99508							Prupe.6G103900	Hormone.Cytokinin	hydrolase activity, cytokinin biosynthetic process, nucleus, cytosol, hydrolase activity, hydrolyzing N-glycosyl compounds	-3.85931							Prupe.4G128600	Hormone.Giberellin	magnesium ion binding, terpene synthase activity, lyase activity, chloroplast, gibberellin biosynthetic process, diterpenoid biosynthetic process	-4.5647		Prupe.1G222800	Hormone.IAA	regulation of auxin polar transport, gravitropism	3.70337							Prupe.7G141400	Hormone.Salicylic Acid	methyl indole-3-acetate esterase activity, methyl salicylate esterase activity, methyl jasmonate esterase activity, jasmonic acid metabolic process, salicylic acid metabolic process	3.9152
Prupe.6G070900	Hormone.ABA	response to abscisic acid	-2.27895																						Prupe.3G035000	Hormone.IAA	response to auxin	-2.78807							Prupe.3G135100	Hormone.Salicylic Acid	membrane, integral component of membrane, regulation of defense response, cellular response to salicylic acid stimulus, regulation of salicylic acid mediated signaling pathway, protein binding	-9.42213
Prupe.6G280200	Hormone.ABA	cytosol, response to abscisic acid	-5.78223																						Prupe.1G491300	Hormone.IAA	membrane, integral component of membrane, auxin-activated signaling pathway, transmembrane transport, plasma membrane, symporter activity, amino acid transport	-3.18693							Prupe.4G203500	Hormone.Salicylic Acid	membrane, integral component of membrane, regulation of defense response, cellular response to salicylic acid stimulus, regulation of salicylic acid mediated signaling pathway, protein binding	3.13651
Prupe.3G005100	Hormone.ABA	cytoplasm, transferase activity, carbohydrate metabolic process, transferase activity, transferring glycosyl groups, galactose metabolic process, response to heat, response to abscisic acid, response to salt stress, inositol 3-alpha-galactosyltransferase activity, response to water deprivation, response to high light intensity, response to hydrogen peroxide, response to cold	-3.33653																						Prupe.2G213000	Hormone.IAA	nucleus, DNA binding, regulation of transcription, DNA-templated, auxin-activated signaling pathway, response to hormone, transcription, DNA-templated, protein binding	-2.39373							Prupe.3G154700	Hormone.Salicylic Acid	integral component of membrane, regulation of defense response, cellular response to salicylic acid stimulus, regulation of salicylic acid mediated signaling pathway, membrane, protein binding	2.10972
Prupe.1G133500	Hormone.ABA	mitochondrion, response to abscisic acid, response to water deprivation, cold acclimation, response to cold	-2.62729																						Prupe.1G287400	Hormone.IAA	nucleus, membrane, integral component of membrane, auxin-activated signaling pathway, regulation of transcription, DNA-templated, transcription, DNA-templated	6.2446							Prupe.4G203600	Hormone.Salicylic Acid	membrane, integral component of membrane, regulation of defense response, cellular response to salicylic acid stimulus, regulation of salicylic acid mediated signaling pathway, protein binding	3.17669
Prupe.1G127500	Hormone.ABA	defense response, response to biotic stimulus, protein phosphatase inhibitor activity, abscisic acid-activated signaling pathway, negative regulation of phosphoprotein phosphatase activity, abscisic acid binding, signaling receptor activity, nucleus, cytoplasm, regulation of protein serine/threonine phosphatase activity	4.86591																						Prupe.1G371500	Hormone.IAA	nucleus, auxin-activated signaling pathway, multicellular organism development, auxin biosynthetic process, DNA binding, positive regulation of transcription, DNA-templated	-4.05865							Prupe.3G155300	Hormone.Salicylic Acid	membrane, integral component of membrane, regulation of defense response, cellular response to salicylic acid stimulus, regulation of salicylic acid mediated signaling pathway, protein binding	-5.00024
Prupe.3G170400	Hormone.ABA	membrane, integral component of membrane, response to abscisic acid	-2.89924																						Prupe.2G036500	Hormone.IAA	nucleus, auxin-activated signaling pathway, multicellular organism development, auxin biosynthetic process, DNA binding, positive regulation of transcription, DNA-templated	-3.02544							Prupe.7G141300	Hormone.Salicylic Acid	methyl indole-3-acetate esterase activity, methyl salicylate esterase activity, methyl jasmonate esterase activity, jasmonic acid metabolic process, salicylic acid metabolic process	3.22795
Prupe.1G258100	Hormone.ABA	defense response, response to biotic stimulus, protein phosphatase inhibitor activity, abscisic acid-activated signaling pathway, negative regulation of phosphoprotein phosphatase activity, abscisic acid binding, signaling receptor activity	-5.00457																						Prupe.7G185200	Hormone.IAA	transmembrane transport, membrane, integral component of membrane, auxin-activated signaling pathway	-2.58907							Prupe.4G145300	Hormone.Salicylic Acid	membrane, integral component of membrane, regulation of defense response, cellular response to salicylic acid stimulus, regulation of salicylic acid mediated signaling pathway, protein binding	2.27285
																									Prupe.1G221300	Hormone.IAA	response to auxin	-2.39104							Prupe.4G144900	Hormone.Salicylic Acid	membrane, integral component of membrane, regulation of defense response, cellular response to salicylic acid stimulus, regulation of salicylic acid mediated signaling pathway, protein binding	-5.57119
																									Prupe.8G078800	Hormone.IAA	response to auxin	2.8796
																									Prupe.3G001800	Hormone.IAA	nucleus, regulation of transcription, DNA-templated, auxin-activated signaling pathway, transcription, DNA-templated, protein binding	-6.1052
																									Prupe.1G260400	Hormone.IAA	hydrolase activity, endoplasmic reticulum, IAA-Ala conjugate hydrolase activity, auxin metabolic process	-2.50239
																									Prupe.1G367800	Hormone.IAA	response to auxin	-2.48486
																									Prupe.4G140200	Hormone.IAA	response to auxin	-4.45099
																									Prupe.8G080100	Hormone.IAA	response to auxin	-7.16589
																									Prupe.1G208300	Hormone.IAA	nucleus, regulation of transcription, DNA-templated, auxin-activated signaling pathway, transcription, DNA-templated, protein binding	-4.23902
																									Prupe.1G406300	Hormone.IAA	plasma membrane, membrane, auxin-activated signaling pathway	-2.78717
																									Prupe.7G200200	Hormone.IAA	manganese ion binding, metal ion binding, extracellular region, cell wall, apoplast, auxin-activated signaling pathway, nutrient reservoir activity	-7.11086
																									Prupe.1G356000	Hormone.IAA	membrane, integral component of membrane, auxin-activated signaling pathway, transmembrane transport, plasma membrane, symporter activity, amino acid transport	2.23937

## Sheet: CNR_CRR
ABA					BR					Cytokinin					Ethylene					Gibberellin					IAA					Jasmonate					Salicylic Acid
Gene_id	Pathway	description	logFC		Gene_id	Pathway	description	logFC		Gene_id	Pathway	description	logFC		Gene_id	Pathway	description	logFC		Gene_id	Pathway	description	logFC		Gene_id	Pathway	description	logFC		Gene_id	Pathway	description	logFC		Gene_id	Pathway	description	logFC
Prupe.8G258500	Hormone.ABA	membrane, integral component of membrane, heme binding, porphyrin-containing compound metabolic process, response to osmotic stress, response to salt stress, response to abscisic acid, endoplasmic reticulum, Golgi apparatus, Golgi stack	-3.71585		Prupe.6G065300	Hormone.BR	plasma membrane, ATP binding, membrane, protein kinase activity, protein phosphorylation, brassinosteroid mediated signaling pathway, protein binding	-2.05525		Prupe.6G123100	Hormone.Cytokinin	phosphorelay signal transduction system, intracellular, cytokinin-activated signaling pathway, cytosol, protein phosphorylation, nucleus, positive regulation of cytokinin-activated signaling pathway, cytoplasm, phosphorylation, histidine phosphotransfer kinase activity, protein histidine kinase binding	4.10874							Prupe.4G238400	Hormone.Giberellin	magnesium ion binding, terpene synthase activity, lyase activity, chloroplast, gibberellin biosynthetic process, diterpenoid biosynthetic process	-5.73242		Prupe.1G287400	Hormone.IAA	nucleus, membrane, integral component of membrane, auxin-activated signaling pathway, regulation of transcription, DNA-templated, transcription, DNA-templated	5.21868		Prupe.6G040000	Hormone.Jasmonate	, methyl indole-3-acetate esterase activity, methyl salicylate esterase activity, methyl jasmonate esterase activity, jasmonic acid metabolic process, salicylic acid metabolic process	3.39337		Prupe.6G040000	Hormone.Salicylic Acid	, methyl indole-3-acetate esterase activity, methyl salicylate esterase activity, methyl jasmonate esterase activity, jasmonic acid metabolic process, salicylic acid metabolic process	3.39337
										Prupe.3G059200		cytosol, phosphorelay signal transduction system, protein phosphorylation, intracellular, nucleus, cytoplasm, phosphorylation, histidine phosphotransfer kinase activity, protein histidine kinase binding, cytokinin-activated signaling pathway	-4.53042							Prupe.1G535600	Hormone.Giberellin	oxidation-reduction process, oxidoreductase activity, metal ion binding, dioxygenase activity, response to light stimulus, gibberellin biosynthetic process, gibberellin 20-oxidase activity, unidimensional cell growth, flower development	-5.0114		Prupe.8G158200	Hormone.IAA	response to auxin	3.80979		Prupe.7G141100	Hormone.Jasmonate	methyl indole-3-acetate esterase activity, methyl salicylate esterase activity, methyl jasmonate esterase activity, jasmonic acid metabolic process, salicylic acid metabolic process	-7.83561		Prupe.3G135100	Hormone.Salicylic Acid	membrane, integral component of membrane, regulation of defense response, cellular response to salicylic acid stimulus, regulation of salicylic acid mediated signaling pathway, protein binding	-4.49946
																									Prupe.1G481700	Hormone.IAA	nucleus, regulation of transcription, DNA-templated, auxin-activated signaling pathway, transcription, DNA-templated, protein binding	-3.28814		Prupe.7G141300	Hormone.Jasmonate	methyl indole-3-acetate esterase activity, methyl salicylate esterase activity, methyl jasmonate esterase activity, jasmonic acid metabolic process, salicylic acid metabolic process	-3.19		Prupe.7G182400	Hormone.Salicylic Acid	integral component of membrane, regulation of defense response, cellular response to salicylic acid stimulus, regulation of salicylic acid mediated signaling pathway, protein binding	-7.60909
																									Prupe.1G444900	Hormone.IAA	membrane, integral component of membrane, auxin-activated signaling pathway, transmembrane transport, plasma membrane, symporter activity, amino acid transport	-4.59757		Prupe.8G115300	Hormone.Jasmonate	methyl indole-3-acetate esterase activity, methyl salicylate esterase activity, methyl jasmonate esterase activity, jasmonic acid metabolic process, salicylic acid metabolic process	-6.16075		Prupe.4G202700	Hormone.Salicylic Acid	membrane, integral component of membrane, regulation of defense response, cellular response to salicylic acid stimulus, regulation of salicylic acid mediated signaling pathway, protein binding	-6.45678
																									Prupe.3G268000	Hormone.IAA	nucleus, DNA binding, response to auxin	-2.25473							Prupe.8G110300	Hormone.Salicylic Acid	membrane, integral component of membrane, regulation of defense response, cellular response to salicylic acid stimulus, regulation of salicylic acid mediated signaling pathway, protein binding	-4.98073
																																			Prupe.7G141100	Hormone.Salicylic Acid	methyl indole-3-acetate esterase activity, methyl salicylate esterase activity, methyl jasmonate esterase activity, jasmonic acid metabolic process, salicylic acid metabolic process	-7.83561
																																			Prupe.7G141300	Hormone.Salicylic Acid	methyl indole-3-acetate esterase activity, methyl salicylate esterase activity, methyl jasmonate esterase activity, jasmonic acid metabolic process, salicylic acid metabolic process	-3.19
																																			Prupe.8G115300	Hormone.Salicylic Acid	methyl indole-3-acetate esterase activity, methyl salicylate esterase activity, methyl jasmonate esterase activity, jasmonic acid metabolic process, salicylic acid metabolic process	-6.16075
																																			Prupe.4G144900	Hormone.Salicylic Acid	membrane, integral component of membrane, regulation of defense response, cellular response to salicylic acid stimulus, regulation of salicylic acid mediated signaling pathway, protein binding	-4.12686
																																			Prupe.4G202900	Hormone.Salicylic Acid	membrane, integral component of membrane, regulation of defense response, cellular response to salicylic acid stimulus, regulation of salicylic acid mediated signaling pathway, protein binding	-4.633
																																			Prupe.4G203500	Hormone.Salicylic Acid	membrane, integral component of membrane, regulation of defense response, cellular response to salicylic acid stimulus, regulation of salicylic acid mediated signaling pathway, protein binding	-3.22443

## Sheet: TNR_TRR
ABA					BR					Cytokinin					Ethylene					Gibberellin					IAA					Jasmonate					Salicylic Acid
Gene_id	Pathway	description	logFC		Gene_id	Pathway	description	logFC		Gene_id	Pathway	description	logFC		Gene_id	Pathway	description	logFC		Gene_id	Pathway	description	logFC		Gene_id	Pathway	description	logFC		Gene_id	Pathway	description	logFC		Gene_id	Pathway	description	logFC
Prupe.7G221700	Hormone.ABA	cytoplasm, plasma membrane, membrane, negative regulation of phosphoprotein phosphatase activity, protein phosphatase inhibitor activity, abscisic acid-activated signaling pathway	-2.59236		Prupe.6G065400	Hormone.BR	plasma membrane, ATP binding, membrane, protein kinase activity, protein phosphorylation, brassinosteroid mediated signaling pathway, protein binding	-2.14876		Prupe.6G123100	Hormone.Cytokinin	phosphorelay signal transduction system, intracellular, cytokinin-activated signaling pathway, cytosol, protein phosphorylation, nucleus, positive regulation of cytokinin-activated signaling pathway, cytoplasm, phosphorylation, histidine phosphotransfer kinase activity, protein histidine kinase binding	4.77333							Prupe.4G238400	Hormone.Giberellin	magnesium ion binding, terpene synthase activity, lyase activity, chloroplast, gibberellin biosynthetic process, diterpenoid biosynthetic process	-6.6523		Prupe.1G287400	Hormone.IAA	nucleus, membrane, integral component of membrane, auxin-activated signaling pathway, regulation of transcription, DNA-templated, transcription, DNA-templated	5.26454		Prupe.8G115300	Hormonate.Jasmonate	methyl indole-3-acetate esterase activity, methyl salicylate esterase activity, methyl jasmonate esterase activity, jasmonic acid metabolic process, salicylic acid metabolic process	-8.29162		Prupe.3G135100	Hormone.Salicylic Acid	membrane, integral component of membrane, regulation of defense response, cellular response to salicylic acid stimulus, regulation of salicylic acid mediated signaling pathway, protein binding	-4.94909
Prupe.3G005100	Hormone.ABA	cytoplasm, transferase activity, carbohydrate metabolic process, transferase activity, transferring glycosyl groups, galactose metabolic process, response to heat, response to abscisic acid, response to salt stress, inositol 3-alpha-galactosyltransferase activity, response to water deprivation, response to high light intensity, response to hydrogen peroxide, response to cold	-4.46211		Prupe.8G026100	Hormone.BR	oxidation-reduction process, oxidoreductase activity, metal ion binding, monooxygenase activity, iron ion binding, oxidoreductase activity, acting on paired donors, with incorporation or reduction of molecular oxygen, heme binding, multicellular organism development, sterol metabolic process, brassinosteroid homeostasis, brassinosteroid biosynthetic process	3.10243												Prupe.6G196000	Hormone.Giberellin	nucleus, DNA binding, regulation of transcription, DNA-templated, regulation of gibberellin biosynthetic process, seed maturation, DNA-binding transcription factor activity, transcription regulatory region sequence-specific DNA binding	2.47857		Prupe.3G035100	Hormone.IAA	response to auxin	-2.97429		Prupe.7G141100	Hormonate.Jasmonate	methyl indole-3-acetate esterase activity, methyl salicylate esterase activity, methyl jasmonate esterase activity, jasmonic acid metabolic process, salicylic acid metabolic process	-6.37105		Prupe.6G354100	Hormone.Salicylic Acid	hydrolase activity, acting on ester bonds, response to lithium ion, hyperosmotic salinity response, response to salicylic acid	-27.073
Prupe.6G057900	Hormone.ABA	ATP binding, nucleotide binding, membrane, integral component of membrane, ATPase-coupled transmembrane transporter activity, transmembrane transport, ATPase activity, efflux transmembrane transporter activity, abscisic acid-activated signaling pathway, pollen wall assembly, intercellular transport, negative regulation of post-embryonic development, abscisic acid transport, export from cell, glyc…	-2.59255																	Prupe.3G006700	Hormone.Giberellin	oxidation-reduction process, oxidoreductase activity, metal ion binding, dioxygenase activity, response to light stimulus, C-19 gibberellin 2-beta-dioxygenase activity, gibberellin catabolic process	2.7314		Prupe.5G162500	Hormone.IAA	membrane, integral component of membrane, auxin-activated signaling pathway, transmembrane transport, plasma membrane, symporter activity, amino acid transport	-6.86917							Prupe.7G182400	Hormone.Salicylic Acid	integral component of membrane, regulation of defense response, cellular response to salicylic acid stimulus, regulation of salicylic acid mediated signaling pathway, protein binding	-7.60569
Prupe.1G128800	Hormone.ABA	defense response, response to biotic stimulus, protein phosphatase inhibitor activity, abscisic acid-activated signaling pathway, negative regulation of phosphoprotein phosphatase activity, abscisic acid binding, signaling receptor activity, nucleus, cytoplasm, regulation of protein serine/threonine phosphatase activity	4.51381																	Prupe.5G060600	Hormone.Giberellin	oxidation-reduction process, oxidoreductase activity, metal ion binding, dioxygenase activity, response to light stimulus, C-19 gibberellin 2-beta-dioxygenase activity, gibberellin catabolic process	5.6609		Prupe.8G080600	Hormone.IAA	response to auxin	2.59837							Prupe.4G202700	Hormone.Salicylic Acid	membrane, integral component of membrane, regulation of defense response, cellular response to salicylic acid stimulus, regulation of salicylic acid mediated signaling pathway, protein binding	-6.39945
Prupe.8G125800	Hormone.ABA	oxidation-reduction process, oxidoreductase activity, membrane, integral component of membrane, metal ion binding, monooxygenase activity, iron ion binding, oxidoreductase activity, acting on paired donors, with incorporation or reduction of molecular oxygen, heme binding, sterol metabolic process, (+)-abscisic acid 8'-hydroxylase activity	-2.55384																	Prupe.1G535600	Hormone.Giberellin	oxidation-reduction process, oxidoreductase activity, metal ion binding, dioxygenase activity, response to light stimulus, gibberellin biosynthetic process, gibberellin 20-oxidase activity, unidimensional cell growth, flower development	-4.02443		Prupe.5G193200	Hormone.IAA	nucleus, DNA binding, response to auxin	4.06148							Prupe.4G144900	Hormone.Salicylic Acid	membrane, integral component of membrane, regulation of defense response, cellular response to salicylic acid stimulus, regulation of salicylic acid mediated signaling pathway, protein binding	-5.66384
Prupe.8G258500	Hormone.ABA	membrane, integral component of membrane, heme binding, porphyrin-containing compound metabolic process, response to osmotic stress, response to salt stress, response to abscisic acid, endoplasmic reticulum, Golgi apparatus, Golgi stack	-2.83037																						Prupe.4G277700	Hormone.IAA	membrane, integral component of membrane, auxin-activated signaling pathway, transmembrane transport, plasma membrane, symporter activity, amino acid transport	-2.69054							Prupe.8G110300	Hormone.Salicylic Acid	membrane, integral component of membrane, regulation of defense response, cellular response to salicylic acid stimulus, regulation of salicylic acid mediated signaling pathway, protein binding	-3.13114
Prupe.1G220700	Hormone.ABA	plasma membrane, membrane, integral component of membrane, carbohydrate transport, carbohydrate transmembrane transport, sugar transmembrane transporter activity, sucrose transmembrane transporter activity, embryo development ending in seed dormancy, leaf senescence, seed maturation, sucrose transport, cellular response to abscisic acid stimulus, cellular response to salicylic acid stimulus, cell…	-3.93148																						Prupe.5G106200	Hormone.IAA	catalytic activity, biosynthetic process, pyridoxal phosphate binding, response to oxidative stress, response to wounding, response to auxin, cell division, phloem or xylem histogenesis, cellular response to iron ion, response to mechanical stimulus, response to jasmonic acid, 1-aminocyclopropane-1-carboxylate synthase activity, identical protein binding	2.11652							Prupe.8G115300	Hormone.Salicylic Acid	methyl indole-3-acetate esterase activity, methyl salicylate esterase activity, methyl jasmonate esterase activity, jasmonic acid metabolic process, salicylic acid metabolic process	-8.29162
																									Prupe.8G080300	Hormone.IAA	response to auxin	-3.52536							Prupe.7G141100	Hormone.Salicylic Acid	methyl indole-3-acetate esterase activity, methyl salicylate esterase activity, methyl jasmonate esterase activity, jasmonic acid metabolic process, salicylic acid metabolic process	-6.37105
																									Prupe.8G080700	Hormone.IAA	response to auxin	4.3323							Prupe.1G220700	Hormone.Salicylic Acid	plasma membrane, membrane, integral component of membrane, carbohydrate transport, carbohydrate transmembrane transport, sugar transmembrane transporter activity, sucrose transmembrane transporter activity, embryo development ending in seed dormancy, leaf senescence, seed maturation, sucrose transport, cellular response to abscisic acid stimulus, cellular response to salicylic acid stimulus, cell…	-3.93148
																									Prupe.8G158200	Hormone.IAA	response to auxin	2.25128							Prupe.4G202900	Hormone.Salicylic Acid	membrane, integral component of membrane, regulation of defense response, cellular response to salicylic acid stimulus, regulation of salicylic acid mediated signaling pathway, protein binding	-4.87485
