# Supplementary material for: Morphological, Physiological, Biochemical, and Transcriptome Studies Reveal The Importance of Different Component Traits During Salinity Stress in Prunus
Source: Research Square preprint supplement (doi:10.21203/rs.3.rs-659140/v1), 2021-07-07
Supplement: Supplementary file 12 [file 594bcf8a53d56b77862190b8.xlsx]

## Sheet: Sheet1
			Supplementary Table S2. Summary of the RNA-Sequencing (RNA-Seq) reads of 24 libraries.
Genotype	Irrigation	Sample_tissue	Replication	Sample_ID	Raw Reads	Clean reads	Clean Gbases	Error (%)	Q20 (%)	Q30 (%)	GC (%)	Total mapped
Nemaguard	Control	Leaf	R1	CNL-1	47359576	46378552	7	0.02	98.11	94.52	45.99	44713343	0.9641
Nemaguard	Control	Leaf	R2	CNL-2	46803378	45834326	6.9	0.03	97.96	94.13	45.68	44201583	0.9644
Nemaguard	Control	Leaf	R3	CNL-3	44601504	43423936	6.5	0.03	97.94	94.05	45.73	41554636	0.957
Nemaguard	Control	Root	R1	CNR-1	52583338	51361148	7.7	0.03	97.85	93.77	45.51	47906319	0.9327
Nemaguard	Control	Root	R2	CNR-2	62389872	60925560	9.1	0.03	97.98	94.09	45.25	57214811	0.9391
Nemaguard	Control	Root	R3	CNR-3	56686528	55352254	8.3	0.03	97.99	94.09	45.4	51768575	0.9353
RootPac 40	Control	Leaf	R1	CRL-1	74718590	73422408	11	0.02	98.08	94.21	46.24	67086281	0.9137
RootPac 40	Control	Leaf	R2	CRL-2	72531660	71031960	10.7	0.02	98.07	94.24	46.44	67861701	0.897
RootPac 40	Control	Leaf	R3	CRL-3	75790790	74447282	11.2	0.03	98.05	94.16	45.78	6.78587e+07	0.9115
RootPac 40	Control	Root	R1	CRR-1	80460240	78847528	11.8	0.03	97.95	93.95	45.08	71994951	0.9131
RootPac 40	Control	Root	R2	CRR-2	84982278	83041242	12.5	0.03	97.79	93.65	45.63	73594701	0.8862
RootPac 40	Control	Root	R3	CRR-3	106260034	103784116	15.6	0.03	97.87	93.92	45.7	91519551	0.8818
Nemaguard	Treatment	Leaf	R1	TNL-1	46326444	45250714	6.8	0.02	98.12	94.51	45.66	43721325	0.9662
Nemaguard	Treatment	Leaf	R2	TNL-2	42111562	41198442	6.2	0.02	98.13	94.54	45.77	39648804	0.9624
Nemaguard	Treatment	Leaf	R3	TNL-3	42652544	41697552	6.3	0.02	98.28	94.98	45.62	38334364	0.9193
Nemaguard	Treatment	Root	R1	TNR-1	64230178	62750876	9.4	0.03	97.95	94.01	45.23	57902936	0.9227
Nemaguard	Treatment	Root	R2	TNR-2	51619874	50521966	7.6	0.03	97.92	93.94	45.6	46876552	0.9278
Nemaguard	Treatment	Root	R3	TNR-3	56559680	55125210	8.3	0.03	97.98	94.06	45.59	50584752	0.9176
RootPac 40	Treatment	Leaf	R1	TRL-1	69894470	68667728	10.3	0.03	98.02	94.04	45.9	62665400	0.9126
RootPac 40	Treatment	Leaf	R2	TRL-2	80493320	78701142	11.8	0.03	97.99	94.05	45.99	71576566	0.9095
RootPac 40	Treatment	Leaf	R3	TRL-3	73455666	71987558	10.8	0.02	98.13	94.37	45.91	65152776	0.9051
RootPac 40	Treatment	Root	R1	TRR-1	87204778	85224560	12.8	0.03	97.99	94.12	45.46	76988938	0.9034
RootPac 40	Treatment	Root	R2	TRR-2	71123132	69545840	10.4	0.03	98.03	94.18	45.51	61936602	0.8906
RootPac 40-	Treatment	Root	R3	TRR-3	95349802	93362676	14	0.02	98.07	94.26	45.58	85172247	0.9123
