# Supplementary material for: Morphological, Physiological, Biochemical, and Transcriptome Studies Reveal The Importance of Different Component Traits During Salinity Stress in Prunus
Source: Research Square preprint supplement (doi:10.21203/rs.3.rs-659140/v1), 2021-07-07
Supplement: Supplementary file 13 [file e93056358f99626f652f3bfe.xlsx]

## Sheet: TNL_CNL
Supplemental Table S9. Differentially expressed genes (DEGs) involved in redox signaling.
Heme					Glutathione					Ascorbate					Catalase
Gene_id	Pathway	description	logFC		Gene_id	Pathway	description	logFC		Gene_id	Pathway	description	logFC		Gene_id	Pathway	description	logFC
Prupe.1G230800	redox.heme	oxidation-reduction process, oxidoreductase activity, metal ion binding, monooxygenase activity, iron ion binding, oxidoreductase activity, acting on paired donors, with incorporation or reduction of molecular oxygen, heme binding	-5.87773		Prupe.4G146400	redox.Glutathione	cytoplasm, glutathione transferase activity, glutathione metabolic process, protein binding	-4.40818
Prupe.6G227100	redox.heme	oxidation-reduction process, oxidoreductase activity, membrane, integral component of membrane, metal ion binding, monooxygenase activity, iron ion binding, oxidoreductase activity, acting on paired donors, with incorporation or reduction of molecular oxygen, heme binding, oxidoreductase activity, acting on paired donors, with incorporation or reduction of molecular oxygen, NAD(P)H as one donor, …	-6.39351
Prupe.5G163700	redox.heme	oxidation-reduction process, oxidoreductase activity, metal ion binding, monooxygenase activity, iron ion binding, oxidoreductase activity, acting on paired donors, with incorporation or reduction of molecular oxygen, heme binding	-3.78754

## Sheet: TRL_CRL
Heme					Glutathione					Ascorbate					Catalase
Gene_id	Pathway	description	logFC		Gene_id	Pathway	description	logFC		Gene_id	Pathway	description	logFC		Gene_id	Pathway	description	logFC

## Sheet: TNR_CNR
Heme					Glutathione					Ascorbate					Catalase
Gene_id	Pathway	description	logFC		Gene_id	Pathway	description	logFC		Gene_id	Pathway	description	logFC		Gene_id	Pathway	description	logFC
Prupe.1G230500	redox.heme	oxidation-reduction process, oxidoreductase activity, metal ion binding, monooxygenase activity, iron ion binding, oxidoreductase activity, acting on paired donors, with incorporation or reduction of molecular oxygen, heme binding	-5.50821
Prupe.6G038200	redox.heme	oxidation-reduction process, oxidoreductase activity, membrane, integral component of membrane, metal ion binding, monooxygenase activity, iron ion binding, oxidoreductase activity, acting on paired donors, with incorporation or reduction of molecular oxygen, heme binding	3.36766
Prupe.1G292500	redox.heme	oxidation-reduction process, oxidoreductase activity, membrane, integral component of membrane, metal ion binding, monooxygenase activity, iron ion binding, oxidoreductase activity, acting on paired donors, with incorporation or reduction of molecular oxygen, heme binding	2.7206

## Sheet: TRR_CRR
Heme					Glutathione					Ascorbate					Catalase
Gene_id	Pathway	description	logFC		Gene_id	Pathway	description	logFC		Gene_id	Pathway	description	logFC		Gene_id	Pathway	description	logFC

## Sheet: CNL_CRL
Heme					Glutathione					Ascorbate					Catalase
Gene_id	Pathway	description	logFC		Gene_id	Pathway	description	logFC		Gene_id	Pathway	description	logFC		Gene_id	Pathway	description	logFC
Prupe.1G387500	redox.heme	oxidation-reduction process, oxidoreductase activity, membrane, integral component of membrane, metal ion binding, monooxygenase activity, iron ion binding, oxidoreductase activity, acting on paired donors, with incorporation or reduction of molecular oxygen, heme binding, defense response to other organism	7.25918		Prupe.4G147100	redox.Glutathione	cytoplasm, glutathione transferase activity, glutathione metabolic process, protein binding	6.56782		Prupe.6G155100	redox.Ascorbate	oxidation-reduction process, oxidoreductase activity, metal ion binding, extracellular region, copper ion binding, L-ascorbate oxidase activity, plasmodesma	-2.60538		Prupe.6G018300	redox.Catalase	oxidation-reduction process, membrane, integral component of membrane, heme binding, cellular oxidant detoxification, catalase activity, catalytic activity, lipid biosynthetic process	-2.06282
Prupe.6G223400	redox.heme	oxidation-reduction process, oxidoreductase activity, metal ion binding, extracellular region, heme binding, peroxidase activity, cellular oxidant detoxification, response to oxidative stress, hydrogen peroxide catabolic process	4.92483		Prupe.1G054900	redox.Glutathione	cytoplasm, glutathione transferase activity, glutathione metabolic process, protein binding	3.42217		Prupe.7G171100	redox.Ascorbate	oxidation-reduction process, oxidoreductase activity, metal ion binding, heme binding, peroxidase activity, cellular oxidant detoxification, response to oxidative stress, response to reactive oxygen species, chloroplast, cellular response to oxidative stress, hydrogen peroxide catabolic process, L-ascorbate peroxidase activity	-2.70894
Prupe.1G229700	redox.heme	oxidation-reduction process, oxidoreductase activity, metal ion binding, monooxygenase activity, iron ion binding, oxidoreductase activity, acting on paired donors, with incorporation or reduction of molecular oxygen, heme binding	8.42939		Prupe.4G147200	redox.Glutathione	cytoplasm, glutathione transferase activity, glutathione metabolic process, protein binding	3.43767		Prupe.6G242200	redox.Ascorbate	oxidation-reduction process, oxidoreductase activity, metal ion binding, heme binding, peroxidase activity, cellular oxidant detoxification, response to oxidative stress, response to reactive oxygen species, chloroplast, cellular response to oxidative stress, hydrogen peroxide catabolic process, L-ascorbate peroxidase activity	2.54369
Prupe.3G039300	redox.heme	oxidation-reduction process, oxidoreductase activity, membrane, integral component of membrane, metal ion binding, monooxygenase activity, iron ion binding, oxidoreductase activity, acting on paired donors, with incorporation or reduction of molecular oxygen, heme binding	3.66653		Prupe.1G055000	redox.Glutathione	cytoplasm, glutathione transferase activity, glutathione metabolic process, protein binding	4.79736		Prupe.4G131900	redox.Ascorbate	oxidation-reduction process, oxidoreductase activity, metal ion binding, extracellular region, copper ion binding, L-ascorbate oxidase activity	-2.20755
Prupe.8G038900	redox.heme	oxidation-reduction process, oxidoreductase activity, metal ion binding, extracellular region, heme binding, peroxidase activity, cellular oxidant detoxification, response to oxidative stress, hydrogen peroxide catabolic process, plasmodesma, plant-type cell wall	2.7369		Prupe.1G526000	redox.Glutathione	cytoplasm, glutathione transferase activity, glutathione metabolic process, protein binding	2.75776
Prupe.1G388500	redox.heme	oxidation-reduction process, oxidoreductase activity, membrane, integral component of membrane, metal ion binding, monooxygenase activity, iron ion binding, oxidoreductase activity, acting on paired donors, with incorporation or reduction of molecular oxygen, heme binding, endoplasmic reticulum, chloroplast outer membrane, gibberellin biosynthetic process, ent-kaurene oxidation to kaurenoic acid,…	-2.06104		Prupe.8G210400	redox.Glutathione	cytoplasm, glutathione transferase activity, glutathione metabolic process, protein binding	5.41179
Prupe.1G296600	redox.heme	oxidation-reduction process, oxidoreductase activity, membrane, integral component of membrane, metal ion binding, monooxygenase activity, iron ion binding, oxidoreductase activity, acting on paired donors, with incorporation or reduction of molecular oxygen, heme binding	4.14542		Prupe.8G210300	redox.Glutathione	cytoplasm, glutathione transferase activity, glutathione metabolic process, protein binding	5.46759
Prupe.1G230500	redox.heme	oxidation-reduction process, oxidoreductase activity, metal ion binding, monooxygenase activity, iron ion binding, oxidoreductase activity, acting on paired donors, with incorporation or reduction of molecular oxygen, heme binding	4.6046		Prupe.8G018600	redox.Glutathione	oxidation-reduction process, oxidoreductase activity, metal ion binding, zinc ion binding, cytosol, alcohol dehydrogenase activity, zinc-dependent, S-(hydroxymethyl)glutathione dehydrogenase activity, formaldehyde catabolic process	-3.97727
Prupe.7G198300	redox.heme	oxidation-reduction process, oxidoreductase activity, metal ion binding, monooxygenase activity, iron ion binding, oxidoreductase activity, acting on paired donors, with incorporation or reduction of molecular oxygen, heme binding	-11.5048		Prupe.4G146200	redox.Glutathione	cytoplasm, glutathione transferase activity, glutathione metabolic process, protein binding	-3.03062
Prupe.1G387200	redox.heme	oxidation-reduction process, oxidoreductase activity, metal ion binding, monooxygenase activity, iron ion binding, oxidoreductase activity, acting on paired donors, with incorporation or reduction of molecular oxygen, heme binding, defense response to other organism	-3.65094		Prupe.1G456300	redox.Glutathione	glutathione catabolic process, gamma-glutamylcyclotransferase activity, cytoplasm	3.13643
Prupe.1G291800	redox.heme	oxidation-reduction process, oxidoreductase activity, membrane, integral component of membrane, metal ion binding, monooxygenase activity, iron ion binding, oxidoreductase activity, acting on paired donors, with incorporation or reduction of molecular oxygen, heme binding	3.29295		Prupe.6G040700	redox.Glutathione	cytoplasm, glutathione transferase activity, glutathione metabolic process, protein binding	3.79443
Prupe.1G381900	redox.heme	oxidation-reduction process, oxidoreductase activity, metal ion binding, monooxygenase activity, iron ion binding, oxidoreductase activity, acting on paired donors, with incorporation or reduction of molecular oxygen, heme binding	2.65314		Prupe.8G210500	redox.Glutathione	cytoplasm, glutathione transferase activity, glutathione metabolic process, protein binding	4.65716
Prupe.2G148600	redox.heme	oxidation-reduction process, oxidoreductase activity, membrane, integral component of membrane, metal ion binding, monooxygenase activity, iron ion binding, oxidoreductase activity, acting on paired donors, with incorporation or reduction of molecular oxygen, heme binding	-2.26414		Prupe.8G210200	redox.Glutathione	cytoplasm, glutathione transferase activity, glutathione metabolic process, protein binding	2.62976
Prupe.1G537700	redox.heme	oxidation-reduction process, oxidoreductase activity, metal ion binding, monooxygenase activity, iron ion binding, oxidoreductase activity, acting on paired donors, with incorporation or reduction of molecular oxygen, heme binding, defense response to other organism	-6.41605		Prupe.8G210700	redox.Glutathione	cytoplasm, glutathione transferase activity, glutathione metabolic process, protein binding	7.40587
Prupe.4G153100	redox.heme	oxidation-reduction process, iron ion binding, oxidoreductase activity, acting on paired donors, with incorporation or reduction of molecular oxygen, heme binding, monooxygenase activity	-5.15266		Prupe.4G146000	redox.Glutathione	cytoplasm, glutathione transferase activity, glutathione metabolic process, protein binding	-3.05372
Prupe.1G292400	redox.heme	oxidation-reduction process, oxidoreductase activity, membrane, integral component of membrane, metal ion binding, monooxygenase activity, iron ion binding, oxidoreductase activity, acting on paired donors, with incorporation or reduction of molecular oxygen, heme binding	4.35685		Prupe.4G147300	redox.Glutathione	cytoplasm, glutathione transferase activity, glutathione metabolic process, protein binding	3.80075
Prupe.1G291500	redox.heme	oxidation-reduction process, oxidoreductase activity, membrane, integral component of membrane, metal ion binding, monooxygenase activity, iron ion binding, oxidoreductase activity, acting on paired donors, with incorporation or reduction of molecular oxygen, heme binding	2.70628		Prupe.4G146100	redox.Glutathione	cytoplasm, glutathione transferase activity, glutathione metabolic process, protein binding	-3.20452
Prupe.7G198000	redox.heme	oxidation-reduction process, oxidoreductase activity, metal ion binding, monooxygenase activity, iron ion binding, oxidoreductase activity, acting on paired donors, with incorporation or reduction of molecular oxygen, heme binding	-10.6282		Prupe.4G147000	redox.Glutathione	cytoplasm, glutathione transferase activity, glutathione metabolic process, protein binding	4.32581
Prupe.1G427300	redox.heme	oxidation-reduction process, oxidoreductase activity, membrane, integral component of membrane, metal ion binding, monooxygenase activity, iron ion binding, oxidoreductase activity, acting on paired donors, with incorporation or reduction of molecular oxygen, heme binding, defense response to other organism	2.39229		Prupe.8G210600	redox.Glutathione	cytoplasm, glutathione transferase activity, glutathione metabolic process, protein binding	5.03201
Prupe.8G128700	redox.heme	oxidation-reduction process, iron ion binding, oxidoreductase activity, acting on paired donors, with incorporation or reduction of molecular oxygen, heme binding	-2.70344		Prupe.5G192800	redox.Glutathione	cytoplasm, glutathione transferase activity, glutathione metabolic process, protein binding	6.66433
Prupe.4G021100	redox.heme	oxidation-reduction process, oxidoreductase activity, metal ion binding, extracellular region, heme binding, peroxidase activity, cellular oxidant detoxification, response to oxidative stress, hydrogen peroxide catabolic process, plasmodesma, plant-type cell wall	-3.06167		Prupe.8G018300	redox.Glutathione	oxidation-reduction process, oxidoreductase activity, metal ion binding, zinc ion binding, cytosol, alcohol dehydrogenase activity, zinc-dependent, S-(hydroxymethyl)glutathione dehydrogenase activity, formaldehyde catabolic process	2.62585
Prupe.4G235800	redox.heme	oxidation-reduction process, oxidoreductase activity, metal ion binding, monooxygenase activity, iron ion binding, oxidoreductase activity, acting on paired donors, with incorporation or reduction of molecular oxygen, heme binding	6.07264		Prupe.5G192700	redox.Glutathione	cytoplasm, glutathione transferase activity, glutathione metabolic process, protein binding	5.83449
Prupe.6G298600	redox.heme	oxidation-reduction process, oxidoreductase activity, membrane, integral component of membrane, metal ion binding, monooxygenase activity, iron ion binding, oxidoreductase activity, acting on paired donors, with incorporation or reduction of molecular oxygen, heme binding	-7.82672		Prupe.4G146800	redox.Glutathione	cytoplasm, glutathione transferase activity, glutathione metabolic process, protein binding	3.15587
Prupe.1G387000	redox.heme	oxidation-reduction process, oxidoreductase activity, membrane, integral component of membrane, metal ion binding, monooxygenase activity, iron ion binding, oxidoreductase activity, acting on paired donors, with incorporation or reduction of molecular oxygen, heme binding, defense response to other organism	6.04014		Prupe.8G207300	redox.Glutathione	oxidation-reduction process, cytosol, zinc ion binding, alcohol dehydrogenase activity, zinc-dependent, S-(hydroxymethyl)glutathione dehydrogenase activity, formaldehyde catabolic process	-4.73255
Prupe.4G152800	redox.heme	oxidation-reduction process, oxidoreductase activity, membrane, integral component of membrane, metal ion binding, monooxygenase activity, iron ion binding, oxidoreductase activity, acting on paired donors, with incorporation or reduction of molecular oxygen, heme binding	-4.81819		Prupe.1G356700	redox.Glutathione	oxidation-reduction process, oxidoreductase activity, metal ion binding, zinc ion binding, cytosol, alcohol dehydrogenase activity, zinc-dependent, S-(hydroxymethyl)glutathione dehydrogenase activity, formaldehyde catabolic process	-2.63012
Prupe.7G158700	redox.heme	oxidation-reduction process, oxidoreductase activity, membrane, integral component of membrane, metal ion binding, monooxygenase activity, iron ion binding, oxidoreductase activity, acting on paired donors, with incorporation or reduction of molecular oxygen, heme binding, multicellular organism development, sterol metabolic process, brassinosteroid homeostasis, brassinosteroid biosynthetic proce…	-2.60612		Prupe.5G192600	redox.Glutathione	cytoplasm, glutathione transferase activity, glutathione metabolic process, protein binding	4.99778
Prupe.8G110100	redox.heme	oxidation-reduction process, metal ion binding, iron ion binding, oxidoreductase activity, acting on paired donors, with incorporation or reduction of molecular oxygen, heme binding, monooxygenase activity, oxidoreductase activity, sterol metabolic process	9.25043		Prupe.1G056100	redox.Glutathione	cytoplasm, glutathione transferase activity, glutathione metabolic process, protein binding	4.38658
Prupe.1G386800	redox.heme	oxidation-reduction process, oxidoreductase activity, metal ion binding, monooxygenase activity, iron ion binding, oxidoreductase activity, acting on paired donors, with incorporation or reduction of molecular oxygen, heme binding, membrane, integral component of membrane, defense response to other organism	-2.50295		Prupe.5G228100	redox.Glutathione	cytoplasm, glutathione transferase activity, glutathione metabolic process, protein binding	2.66157
Prupe.8G107300	redox.heme	metal ion binding, heme binding, oxygen carrier activity, oxygen binding, oxygen transport	6.63692		Prupe.5G099600	redox.Glutathione	catalytic activity, nucleotide binding, ATP binding, ligase activity, chloroplast, plastid, glutathione biosynthetic process, glutamate-cysteine ligase activity, cellular modified amino acid biosynthetic process	-2.95969
Prupe.2G171800	redox.heme	oxidation-reduction process, oxidoreductase activity, membrane, integral component of membrane, metal ion binding, monooxygenase activity, iron ion binding, oxidoreductase activity, acting on paired donors, with incorporation or reduction of molecular oxygen, heme binding	-5.84351		Prupe.5G191500	redox.Glutathione	cytoplasm, glutathione transferase activity, glutathione metabolic process, protein binding	3.04598
Prupe.1G387100	redox.heme	oxidation-reduction process, oxidoreductase activity, membrane, integral component of membrane, metal ion binding, monooxygenase activity, iron ion binding, oxidoreductase activity, acting on paired donors, with incorporation or reduction of molecular oxygen, heme binding, defense response to other organism	2.59321
Prupe.6G046800	redox.heme	oxidation-reduction process, oxidoreductase activity, metal ion binding, monooxygenase activity, iron ion binding, oxidoreductase activity, acting on paired donors, with incorporation or reduction of molecular oxygen, heme binding, membrane, oxidoreductase activity, acting on paired donors, with incorporation or reduction of molecular oxygen, NAD(P)H as one donor, and incorporation of one atom of…	-6.17087
Prupe.5G163700	redox.heme	oxidation-reduction process, oxidoreductase activity, metal ion binding, monooxygenase activity, iron ion binding, oxidoreductase activity, acting on paired donors, with incorporation or reduction of molecular oxygen, heme binding	4.19801
Prupe.2G086300	redox.heme	oxidation-reduction process, oxidoreductase activity, membrane, integral component of membrane, metal ion binding, monooxygenase activity, iron ion binding, oxidoreductase activity, acting on paired donors, with incorporation or reduction of molecular oxygen, heme binding, oxidoreductase activity, acting on paired donors, with incorporation or reduction of molecular oxygen, NAD(P)H as one donor, …	-3.26818
Prupe.6G013200	redox.heme	oxidation-reduction process, oxidoreductase activity, metal ion binding, extracellular region, heme binding, peroxidase activity, cellular oxidant detoxification, response to oxidative stress, hydrogen peroxide catabolic process	-7.38121
Prupe.1G292500	redox.heme	oxidation-reduction process, oxidoreductase activity, membrane, integral component of membrane, metal ion binding, monooxygenase activity, iron ion binding, oxidoreductase activity, acting on paired donors, with incorporation or reduction of molecular oxygen, heme binding	3.65862
Prupe.5G164000	redox.heme	oxidation-reduction process, oxidoreductase activity, membrane, integral component of membrane, metal ion binding, monooxygenase activity, iron ion binding, oxidoreductase activity, acting on paired donors, with incorporation or reduction of molecular oxygen, heme binding	-2.25888
Prupe.6G044300	redox.heme	oxidation-reduction process, oxidoreductase activity, metal ion binding, extracellular region, heme binding, peroxidase activity, cellular oxidant detoxification, response to oxidative stress, hydrogen peroxide catabolic process	2.2594
Prupe.5G164100	redox.heme	oxidation-reduction process, oxidoreductase activity, membrane, integral component of membrane, metal ion binding, monooxygenase activity, iron ion binding, oxidoreductase activity, acting on paired donors, with incorporation or reduction of molecular oxygen, heme binding	-3.73604
Prupe.5G078100	redox.heme	oxidation-reduction process, oxidoreductase activity, membrane, integral component of membrane, metal ion binding, monooxygenase activity, iron ion binding, oxidoreductase activity, acting on paired donors, with incorporation or reduction of molecular oxygen, heme binding	3.63133
Prupe.7G171100	redox.heme	oxidation-reduction process, oxidoreductase activity, metal ion binding, heme binding, peroxidase activity, cellular oxidant detoxification, response to oxidative stress, response to reactive oxygen species, chloroplast, cellular response to oxidative stress, hydrogen peroxide catabolic process, L-ascorbate peroxidase activity	-2.70894
Prupe.1G296900	redox.heme	oxidation-reduction process, oxidoreductase activity, membrane, integral component of membrane, metal ion binding, monooxygenase activity, iron ion binding, oxidoreductase activity, acting on paired donors, with incorporation or reduction of molecular oxygen, heme binding	2.18071
Prupe.6G007200	redox.heme	oxidation-reduction process, oxidoreductase activity, metal ion binding, monooxygenase activity, iron ion binding, oxidoreductase activity, acting on paired donors, with incorporation or reduction of molecular oxygen, heme binding, membrane, oxidoreductase activity, acting on paired donors, with incorporation or reduction of molecular oxygen, NAD(P)H as one donor, and incorporation of one atom of…	-8.43252
Prupe.6G192000	redox.heme	oxidation-reduction process, oxidoreductase activity, metal ion binding, extracellular region, heme binding, peroxidase activity, cellular oxidant detoxification, response to oxidative stress, hydrogen peroxide catabolic process	2.88708
Prupe.1G296300	redox.heme	oxidation-reduction process, oxidoreductase activity, membrane, integral component of membrane, metal ion binding, monooxygenase activity, iron ion binding, oxidoreductase activity, acting on paired donors, with incorporation or reduction of molecular oxygen, heme binding	2.74191
Prupe.5G078800	redox.heme	oxidation-reduction process, oxidoreductase activity, membrane, integral component of membrane, metal ion binding, monooxygenase activity, iron ion binding, oxidoreductase activity, acting on paired donors, with incorporation or reduction of molecular oxygen, heme binding	-2.70909
Prupe.6G176500	redox.heme	oxidation-reduction process, oxidoreductase activity, metal ion binding, monooxygenase activity, iron ion binding, oxidoreductase activity, acting on paired donors, with incorporation or reduction of molecular oxygen, heme binding	-7.412
Prupe.1G387300	redox.heme	oxidation-reduction process, membrane, integral component of membrane, iron ion binding, oxidoreductase activity, acting on paired donors, with incorporation or reduction of molecular oxygen, heme binding	-3.32612
Prupe.4G103000	redox.heme	oxidation-reduction process, oxidoreductase activity, metal ion binding, monooxygenase activity, iron ion binding, oxidoreductase activity, acting on paired donors, with incorporation or reduction of molecular oxygen, heme binding, sterol metabolic process	2.41587
Prupe.7G201400	redox.heme	oxidation-reduction process, oxidoreductase activity, metal ion binding, monooxygenase activity, iron ion binding, oxidoreductase activity, acting on paired donors, with incorporation or reduction of molecular oxygen, heme binding	6.19285
Prupe.4G079400	redox.heme	oxidation-reduction process, oxidoreductase activity, metal ion binding, monooxygenase activity, iron ion binding, oxidoreductase activity, acting on paired donors, with incorporation or reduction of molecular oxygen, heme binding, sterol metabolic process	-5.876
Prupe.6G227100	redox.heme	oxidation-reduction process, oxidoreductase activity, membrane, integral component of membrane, metal ion binding, monooxygenase activity, iron ion binding, oxidoreductase activity, acting on paired donors, with incorporation or reduction of molecular oxygen, heme binding, oxidoreductase activity, acting on paired donors, with incorporation or reduction of molecular oxygen, NAD(P)H as one donor, …	4.28228
Prupe.5G163300	redox.heme	oxidation-reduction process, oxidoreductase activity, membrane, integral component of membrane, metal ion binding, monooxygenase activity, iron ion binding, oxidoreductase activity, acting on paired donors, with incorporation or reduction of molecular oxygen, heme binding	-2.4962
Prupe.7G197900	redox.heme	oxidation-reduction process, oxidoreductase activity, metal ion binding, monooxygenase activity, iron ion binding, oxidoreductase activity, acting on paired donors, with incorporation or reduction of molecular oxygen, heme binding	-6.85795
Prupe.6G242200	redox.heme	oxidation-reduction process, oxidoreductase activity, metal ion binding, heme binding, peroxidase activity, cellular oxidant detoxification, response to oxidative stress, response to reactive oxygen species, chloroplast, cellular response to oxidative stress, hydrogen peroxide catabolic process, L-ascorbate peroxidase activity	2.54369
Prupe.6G226900	redox.heme	oxidation-reduction process, oxidoreductase activity, metal ion binding, monooxygenase activity, iron ion binding, oxidoreductase activity, acting on paired donors, with incorporation or reduction of molecular oxygen, heme binding, membrane, oxidoreductase activity, acting on paired donors, with incorporation or reduction of molecular oxygen, NAD(P)H as one donor, and incorporation of one atom of…	3.61262
Prupe.4G056100	redox.heme	oxidation-reduction process, oxidoreductase activity, membrane, integral component of membrane, metal ion binding, extracellular region, heme binding, peroxidase activity, cellular oxidant detoxification, response to oxidative stress, hydrogen peroxide catabolic process, plasmodesma, plant-type cell wall	-3.30896
Prupe.2G295800	redox.heme	oxidation-reduction process, oxidoreductase activity, membrane, integral component of membrane, metal ion binding, monooxygenase activity, iron ion binding, oxidoreductase activity, acting on paired donors, with incorporation or reduction of molecular oxygen, heme binding	4.4845
Prupe.4G235600	redox.heme	oxidation-reduction process, oxidoreductase activity, metal ion binding, monooxygenase activity, iron ion binding, oxidoreductase activity, acting on paired donors, with incorporation or reduction of molecular oxygen, heme binding	-4.45101
Prupe.1G538200	redox.heme	oxidation-reduction process, oxidoreductase activity, membrane, integral component of membrane, metal ion binding, monooxygenase activity, iron ion binding, oxidoreductase activity, acting on paired donors, with incorporation or reduction of molecular oxygen, heme binding, defense response to other organism	-2.58244
Prupe.6G013500	redox.heme	oxidation-reduction process, oxidoreductase activity, metal ion binding, extracellular region, heme binding, peroxidase activity, cellular oxidant detoxification, response to oxidative stress, hydrogen peroxide catabolic process	2.96211
Prupe.2G260600	redox.heme	oxidation-reduction process, oxidoreductase activity, metal ion binding, extracellular region, heme binding, peroxidase activity, cellular oxidant detoxification, response to oxidative stress, hydrogen peroxide catabolic process	-3.2492
Prupe.5G078600	redox.heme	oxidation-reduction process, oxidoreductase activity, metal ion binding, monooxygenase activity, iron ion binding, oxidoreductase activity, acting on paired donors, with incorporation or reduction of molecular oxygen, heme binding	-5.77503
Prupe.6G227400	redox.heme	oxidation-reduction process, oxidoreductase activity, membrane, integral component of membrane, metal ion binding, monooxygenase activity, iron ion binding, oxidoreductase activity, acting on paired donors, with incorporation or reduction of molecular oxygen, heme binding, oxidoreductase activity, acting on paired donors, with incorporation or reduction of molecular oxygen, NAD(P)H as one donor, …	-3.33818
Prupe.7G071800	redox.heme	oxidation-reduction process, oxidoreductase activity, membrane, integral component of membrane, metal ion binding, monooxygenase activity, iron ion binding, oxidoreductase activity, acting on paired donors, with incorporation or reduction of molecular oxygen, heme binding, oxidoreductase activity, acting on paired donors, with incorporation or reduction of molecular oxygen, NAD(P)H as one donor, …	-4.09771
Prupe.1G410100	redox.heme	oxidation-reduction process, oxidoreductase activity, metal ion binding, monooxygenase activity, iron ion binding, oxidoreductase activity, acting on paired donors, with incorporation or reduction of molecular oxygen, heme binding, membrane, integral component of membrane	-4.50852
Prupe.7G161900	redox.heme	oxidation-reduction process, oxidoreductase activity, metal ion binding, extracellular region, heme binding, peroxidase activity, cellular oxidant detoxification, response to oxidative stress, hydrogen peroxide catabolic process	-2.38029
Prupe.3G115300	redox.heme	oxidation-reduction process, oxidoreductase activity, membrane, integral component of membrane, metal ion binding, extracellular region, heme binding, peroxidase activity, cellular oxidant detoxification, response to oxidative stress, hydrogen peroxide catabolic process	2.99569
Prupe.2G285200	redox.heme	oxidation-reduction process, oxidoreductase activity, metal ion binding, monooxygenase activity, iron ion binding, oxidoreductase activity, acting on paired donors, with incorporation or reduction of molecular oxygen, heme binding, membrane, integral component of membrane	-3.29775
Prupe.5G102600	redox.heme	oxidation-reduction process, oxidoreductase activity, metal ion binding, monooxygenase activity, iron ion binding, oxidoreductase activity, acting on paired donors, with incorporation or reduction of molecular oxygen, heme binding	-4.289
Prupe.4G276800	redox.heme	oxidation-reduction process, oxidoreductase activity, metal ion binding, extracellular region, heme binding, peroxidase activity, cellular oxidant detoxification, response to oxidative stress, hydrogen peroxide catabolic process, plasmodesma, plant-type cell wall	-2.58195
Prupe.2G073800	redox.heme	oxidation-reduction process, oxidoreductase activity, membrane, integral component of membrane, metal ion binding, monooxygenase activity, iron ion binding, oxidoreductase activity, acting on paired donors, with incorporation or reduction of molecular oxygen, heme binding	-4.48367
Prupe.6G041300	redox.heme	oxidation-reduction process, oxidoreductase activity, metal ion binding, monooxygenase activity, iron ion binding, oxidoreductase activity, acting on paired donors, with incorporation or reduction of molecular oxygen, heme binding, membrane, integral component of membrane, sterol metabolic process	-3.53192
Prupe.5G077700	redox.heme	oxidation-reduction process, membrane, integral component of membrane, iron ion binding, oxidoreductase activity, acting on paired donors, with incorporation or reduction of molecular oxygen, heme binding	2.26234
Prupe.6G227000	redox.heme	oxidation-reduction process, oxidoreductase activity, membrane, integral component of membrane, metal ion binding, monooxygenase activity, iron ion binding, oxidoreductase activity, acting on paired donors, with incorporation or reduction of molecular oxygen, heme binding, oxidoreductase activity, acting on paired donors, with incorporation or reduction of molecular oxygen, NAD(P)H as one donor, …	-4.67675
Prupe.4G235900	redox.heme	oxidation-reduction process, oxidoreductase activity, metal ion binding, monooxygenase activity, iron ion binding, oxidoreductase activity, acting on paired donors, with incorporation or reduction of molecular oxygen, heme binding	4.3144
Prupe.5G152200	redox.heme	oxidation-reduction process, iron ion binding, oxidoreductase activity, acting on paired donors, with incorporation or reduction of molecular oxygen, heme binding	-3.90481
Prupe.2G108600	redox.heme	oxidation-reduction process, oxidoreductase activity, metal ion binding, monooxygenase activity, iron ion binding, oxidoreductase activity, acting on paired donors, with incorporation or reduction of molecular oxygen, heme binding, multicellular organism development, endoplasmic reticulum, sterol metabolic process, brassinosteroid homeostasis, brassinosteroid biosynthetic process, ent-kaurenoate …	4.60876
Prupe.6G298700	redox.heme	oxidation-reduction process, oxidoreductase activity, membrane, integral component of membrane, metal ion binding, monooxygenase activity, iron ion binding, oxidoreductase activity, acting on paired donors, with incorporation or reduction of molecular oxygen, heme binding	3.53933
Prupe.8G026100	redox.heme	oxidation-reduction process, oxidoreductase activity, metal ion binding, monooxygenase activity, iron ion binding, oxidoreductase activity, acting on paired donors, with incorporation or reduction of molecular oxygen, heme binding, multicellular organism development, sterol metabolic process, brassinosteroid homeostasis, brassinosteroid biosynthetic process	3.10988
Prupe.1G428400	redox.heme	oxidation-reduction process, iron ion binding, oxidoreductase activity, acting on paired donors, with incorporation or reduction of molecular oxygen, heme binding, membrane, oxidoreductase activity, acting on paired donors, with incorporation or reduction of molecular oxygen, NAD(P)H as one donor, and incorporation of one atom of oxygen	-3.62328
Prupe.4G079100	redox.heme	membrane, integral component of membrane, oxidation-reduction process, oxidoreductase activity, heme binding	-3.55502
Prupe.6G018300	redox.heme	oxidation-reduction process, membrane, integral component of membrane, heme binding, cellular oxidant detoxification, catalase activity, catalytic activity, lipid biosynthetic process	-2.06282
Prupe.1G386900	redox.heme	oxidation-reduction process, oxidoreductase activity, membrane, integral component of membrane, metal ion binding, monooxygenase activity, iron ion binding, oxidoreductase activity, acting on paired donors, with incorporation or reduction of molecular oxygen, heme binding, defense response to other organism	-3.05078
Prupe.2G189800	redox.heme	oxidation-reduction process, oxidoreductase activity, membrane, integral component of membrane, metal ion binding, monooxygenase activity, iron ion binding, oxidoreductase activity, acting on paired donors, with incorporation or reduction of molecular oxygen, heme binding, fatty acid in-chain hydroxylase activity, lipid hydroxylation, anther development, pollen exine formation	2.12129
Prupe.3G064700	redox.heme	oxidation-reduction process, oxidoreductase activity, membrane, integral component of membrane, metal ion binding, monooxygenase activity, iron ion binding, oxidoreductase activity, acting on paired donors, with incorporation or reduction of molecular oxygen, heme binding, defense response to other organism	-4.39727
Prupe.3G066200	redox.heme	oxidation-reduction process, oxidoreductase activity, membrane, integral component of membrane, metal ion binding, monooxygenase activity, iron ion binding, oxidoreductase activity, acting on paired donors, with incorporation or reduction of molecular oxygen, heme binding, defense response to other organism	3.27559
Prupe.2G074300	redox.heme	oxidation-reduction process, oxidoreductase activity, membrane, integral component of membrane, metal ion binding, monooxygenase activity, iron ion binding, oxidoreductase activity, acting on paired donors, with incorporation or reduction of molecular oxygen, heme binding	-3.91325

## Sheet: TNL_TRL
Heme					Glutathione					Ascorbate					Catalase
Gene_id	Pathway	description	logFC		Gene_id	Pathway	description	logFC		Gene_id	Pathway	description	logFC		Gene_id	Pathway	description	logFC
Prupe.1G229700	redox.heme	oxidation-reduction process, oxidoreductase activity, metal ion binding, monooxygenase activity, iron ion binding, oxidoreductase activity, acting on paired donors, with incorporation or reduction of molecular oxygen, heme binding	7.79047		Prupe.4G147200	redox.Glutathione	glutathione metabolic process, cytoplasm, glutathione transferase activity, protein binding	3.06883		Prupe.7G171100	redox.Ascorbate	oxidation-reduction process, oxidoreductase activity, metal ion binding, heme binding, peroxidase activity, cellular oxidant detoxification, response to oxidative stress, response to reactive oxygen species, chloroplast, cellular response to oxidative stress, hydrogen peroxide catabolic process, L-ascorbate peroxidase activity	-2.029		Prupe.6G018300	redox.Catalase	oxidation-reduction process, membrane, integral component of membrane, heme binding, cellular oxidant detoxification, catalase activity	-2.36258
Prupe.1G387500	redox.heme	oxidation-reduction process, oxidoreductase activity, membrane, integral component of membrane, metal ion binding, monooxygenase activity, iron ion binding, oxidoreductase activity, acting on paired donors, with incorporation or reduction of molecular oxygen, heme binding, defense response to other organism	6.76856		Prupe.4G147100	redox.Glutathione	glutathione metabolic process, cytoplasm, glutathione transferase activity, protein binding	5.13752		Prupe.4G131900	redox.Ascorbate	oxidation-reduction process, oxidoreductase activity, metal ion binding, extracellular region, copper ion binding, L-ascorbate oxidase activity	-2.78116
Prupe.6G223400	redox.heme	oxidation-reduction process, oxidoreductase activity, metal ion binding, extracellular region, heme binding, peroxidase activity, cellular oxidant detoxification, response to oxidative stress, hydrogen peroxide catabolic process	4.36747		Prupe.8G018600	redox.Glutathione	oxidation-reduction process, oxidoreductase activity, metal ion binding, zinc ion binding, cytosol, alcohol dehydrogenase activity, zinc-dependent, S-(hydroxymethyl)glutathione dehydrogenase activity, formaldehyde catabolic process	-5.30694		Prupe.6G179500	redox.Ascorbate	oxidation-reduction process, oxidoreductase activity, metal ion binding, extracellular region, copper ion binding, L-ascorbate oxidase activity	-2.6839
Prupe.2G019000	redox.heme	metal ion binding, heme binding, cytosol	2.23128		Prupe.1G055000	redox.Glutathione	glutathione metabolic process, cytoplasm, glutathione transferase activity, protein binding	4.30292
Prupe.1G387200	redox.heme	oxidation-reduction process, oxidoreductase activity, metal ion binding, monooxygenase activity, iron ion binding, oxidoreductase activity, acting on paired donors, with incorporation or reduction of molecular oxygen, heme binding, defense response to other organism	-4.25853		Prupe.1G054900	redox.Glutathione	glutathione metabolic process, cytoplasm, glutathione transferase activity, protein binding	2.62983
Prupe.2G148600	redox.heme	oxidation-reduction process, oxidoreductase activity, membrane, integral component of membrane, metal ion binding, monooxygenase activity, iron ion binding, oxidoreductase activity, acting on paired donors, with incorporation or reduction of molecular oxygen, heme binding	-2.97735		Prupe.1G526000	redox.Glutathione	glutathione metabolic process, cytoplasm, glutathione transferase activity, protein binding	2.1662
Prupe.3G039300	redox.heme	oxidation-reduction process, oxidoreductase activity, membrane, integral component of membrane, metal ion binding, monooxygenase activity, iron ion binding, oxidoreductase activity, acting on paired donors, with incorporation or reduction of molecular oxygen, heme binding	2.88079		Prupe.4G146200	redox.Glutathione	glutathione metabolic process, cytoplasm, glutathione transferase activity, protein binding	-3.21405
Prupe.1G388500	redox.heme	oxidation-reduction process, oxidoreductase activity, membrane, integral component of membrane, metal ion binding, monooxygenase activity, iron ion binding, oxidoreductase activity, acting on paired donors, with incorporation or reduction of molecular oxygen, heme binding, endoplasmic reticulum, chloroplast outer membrane, gibberellin biosynthetic process, ent-kaurene oxidation to kaurenoic acid,…	-2.12356		Prupe.8G210400	redox.Glutathione	glutathione metabolic process, cytoplasm, glutathione transferase activity, protein binding	3.48936
Prupe.8G197300	redox.heme	oxidation-reduction process, oxidoreductase activity, membrane, integral component of membrane, metal ion binding, monooxygenase activity, iron ion binding, oxidoreductase activity, acting on paired donors, with incorporation or reduction of molecular oxygen, heme binding, defense response to other organism	2.06492		Prupe.6G040700	redox.Glutathione	glutathione metabolic process, cytoplasm, glutathione transferase activity, protein binding	3.18315
Prupe.6G226600	redox.heme	oxidation-reduction process, oxidoreductase activity, membrane, integral component of membrane, metal ion binding, monooxygenase activity, iron ion binding, oxidoreductase activity, acting on paired donors, with incorporation or reduction of molecular oxygen, heme binding, oxidoreductase activity, acting on paired donors, with incorporation or reduction of molecular oxygen, NAD(P)H as one donor, …	-2.59031		Prupe.1G456300	redox.Glutathione	glutathione catabolic process, gamma-glutamylcyclotransferase activity, cytoplasm	2.56375
Prupe.8G038900	redox.heme	oxidation-reduction process, oxidoreductase activity, metal ion binding, extracellular region, heme binding, peroxidase activity, cellular oxidant detoxification, response to oxidative stress, hydrogen peroxide catabolic process, plasmodesma, plant-type cell wall	2.1761		Prupe.8G210300	redox.Glutathione	glutathione metabolic process, cytoplasm, glutathione transferase activity, protein binding	3.05858
Prupe.7G198300	redox.heme	oxidation-reduction process, oxidoreductase activity, metal ion binding, monooxygenase activity, iron ion binding, oxidoreductase activity, acting on paired donors, with incorporation or reduction of molecular oxygen, heme binding	-11.3498		Prupe.4G146800	redox.Glutathione	glutathione metabolic process, cytoplasm, glutathione transferase activity, protein binding	3.53281
Prupe.1G381900	redox.heme	oxidation-reduction process, oxidoreductase activity, metal ion binding, monooxygenase activity, iron ion binding, oxidoreductase activity, acting on paired donors, with incorporation or reduction of molecular oxygen, heme binding	2.48874		Prupe.4G146400	redox.Glutathione	glutathione metabolic process, cytoplasm, glutathione transferase activity, protein binding	-4.04524
Prupe.7G198000	redox.heme	oxidation-reduction process, oxidoreductase activity, metal ion binding, monooxygenase activity, iron ion binding, oxidoreductase activity, acting on paired donors, with incorporation or reduction of molecular oxygen, heme binding	-10.6591		Prupe.4G146000	redox.Glutathione	glutathione metabolic process, cytoplasm, glutathione transferase activity, protein binding	-2.57949
Prupe.1G386800	redox.heme	oxidation-reduction process, oxidoreductase activity, metal ion binding, monooxygenase activity, iron ion binding, oxidoreductase activity, acting on paired donors, with incorporation or reduction of molecular oxygen, heme binding, membrane, integral component of membrane, defense response to other organism	-2.86514		Prupe.4G147300	redox.Glutathione	glutathione metabolic process, cytoplasm, glutathione transferase activity, protein binding	2.90855
Prupe.1G296600	redox.heme	oxidation-reduction process, oxidoreductase activity, membrane, integral component of membrane, metal ion binding, monooxygenase activity, iron ion binding, oxidoreductase activity, acting on paired donors, with incorporation or reduction of molecular oxygen, heme binding	2.77362		Prupe.8G207300	redox.Glutathione	oxidation-reduction process, cytosol, zinc ion binding, alcohol dehydrogenase activity, zinc-dependent, S-(hydroxymethyl)glutathione dehydrogenase activity, formaldehyde catabolic process	-3.52504
Prupe.6G298600	redox.heme	oxidation-reduction process, oxidoreductase activity, membrane, integral component of membrane, metal ion binding, monooxygenase activity, iron ion binding, oxidoreductase activity, acting on paired donors, with incorporation or reduction of molecular oxygen, heme binding	-6.38858		Prupe.4G147000	redox.Glutathione	glutathione metabolic process, cytoplasm, glutathione transferase activity, protein binding	3.26977
Prupe.6G046800	redox.heme	oxidation-reduction process, oxidoreductase activity, metal ion binding, monooxygenase activity, iron ion binding, oxidoreductase activity, acting on paired donors, with incorporation or reduction of molecular oxygen, heme binding, membrane, oxidoreductase activity, acting on paired donors, with incorporation or reduction of molecular oxygen, NAD(P)H as one donor, and incorporation of one atom of…	-6.98642		Prupe.4G146100	redox.Glutathione	glutathione metabolic process, cytoplasm, glutathione transferase activity, protein binding	-2.3026
Prupe.1G537700	redox.heme	oxidation-reduction process, oxidoreductase activity, metal ion binding, monooxygenase activity, iron ion binding, oxidoreductase activity, acting on paired donors, with incorporation or reduction of molecular oxygen, heme binding, defense response to other organism	-7.7743		Prupe.5G099600	redox.Glutathione	catalytic activity, nucleotide binding, ATP binding, ligase activity, chloroplast, plastid, glutathione biosynthetic process, glutamate-cysteine ligase activity, cellular modified amino acid biosynthetic process	-5.08046
Prupe.8G128700	redox.heme	oxidation-reduction process, iron ion binding, oxidoreductase activity, acting on paired donors, with incorporation or reduction of molecular oxygen, heme binding	-2.7121		Prupe.8G018400	redox.Glutathione	oxidation-reduction process, oxidoreductase activity, metal ion binding, zinc ion binding, cytosol, alcohol dehydrogenase activity, zinc-dependent, S-(hydroxymethyl)glutathione dehydrogenase activity, formaldehyde catabolic process	-3.11668
Prupe.1G386900	redox.heme	oxidation-reduction process, oxidoreductase activity, membrane, integral component of membrane, metal ion binding, monooxygenase activity, iron ion binding, oxidoreductase activity, acting on paired donors, with incorporation or reduction of molecular oxygen, heme binding, defense response to other organism	-8.21028		Prupe.8G210500	redox.Glutathione	glutathione metabolic process, cytoplasm, glutathione transferase activity, protein binding	2.1724
Prupe.1G230800	redox.heme	oxidation-reduction process, oxidoreductase activity, metal ion binding, monooxygenase activity, iron ion binding, oxidoreductase activity, acting on paired donors, with incorporation or reduction of molecular oxygen, heme binding	-6.63358
Prupe.1G427300	redox.heme	oxidation-reduction process, oxidoreductase activity, membrane, integral component of membrane, metal ion binding, monooxygenase activity, iron ion binding, oxidoreductase activity, acting on paired donors, with incorporation or reduction of molecular oxygen, heme binding, defense response to other organism	2.04424
Prupe.1G292400	redox.heme	oxidation-reduction process, oxidoreductase activity, membrane, integral component of membrane, metal ion binding, monooxygenase activity, iron ion binding, oxidoreductase activity, acting on paired donors, with incorporation or reduction of molecular oxygen, heme binding	3.49507
Prupe.4G153100	redox.heme	oxidation-reduction process, iron ion binding, oxidoreductase activity, acting on paired donors, with incorporation or reduction of molecular oxygen, heme binding, monooxygenase activity	-5.44185
Prupe.5G164100	redox.heme	oxidation-reduction process, oxidoreductase activity, membrane, integral component of membrane, metal ion binding, monooxygenase activity, iron ion binding, oxidoreductase activity, acting on paired donors, with incorporation or reduction of molecular oxygen, heme binding	-3.94257
Prupe.5G078800	redox.heme	oxidation-reduction process, oxidoreductase activity, membrane, integral component of membrane, metal ion binding, monooxygenase activity, iron ion binding, oxidoreductase activity, acting on paired donors, with incorporation or reduction of molecular oxygen, heme binding	-3.25935
Prupe.1G387300	redox.heme	oxidation-reduction process, membrane, integral component of membrane, iron ion binding, oxidoreductase activity, acting on paired donors, with incorporation or reduction of molecular oxygen, heme binding	-4.48348
Prupe.1G230500	redox.heme	oxidation-reduction process, oxidoreductase activity, metal ion binding, monooxygenase activity, iron ion binding, oxidoreductase activity, acting on paired donors, with incorporation or reduction of molecular oxygen, heme binding	2.68814
Prupe.4G021100	redox.heme	oxidation-reduction process, oxidoreductase activity, metal ion binding, extracellular region, heme binding, peroxidase activity, cellular oxidant detoxification, response to oxidative stress, hydrogen peroxide catabolic process, plasmodesma, plant-type cell wall	-2.33671
Prupe.7G243400	redox.heme	oxidation-reduction process, oxidoreductase activity, metal ion binding, extracellular region, heme binding, peroxidase activity, cellular oxidant detoxification, response to oxidative stress, hydrogen peroxide catabolic process, plasmodesma, plant-type cell wall	-2.67735
Prupe.3G219700	redox.heme	oxidation-reduction process, oxidoreductase activity, metal ion binding, extracellular region, heme binding, peroxidase activity, cellular oxidant detoxification, response to oxidative stress, hydrogen peroxide catabolic process, plasmodesma, plant-type cell wall	-2.33978
Prupe.1G291500	redox.heme	oxidation-reduction process, oxidoreductase activity, membrane, integral component of membrane, metal ion binding, monooxygenase activity, iron ion binding, oxidoreductase activity, acting on paired donors, with incorporation or reduction of molecular oxygen, heme binding	2.13971
Prupe.6G044000	redox.heme	oxidation-reduction process, oxidoreductase activity, metal ion binding, extracellular region, heme binding, peroxidase activity, cellular oxidant detoxification, response to oxidative stress, hydrogen peroxide catabolic process	-2.48839
Prupe.7G079100	redox.heme	oxidation-reduction process, oxidoreductase activity, metal ion binding, extracellular region, heme binding, peroxidase activity, cellular oxidant detoxification, response to oxidative stress, hydrogen peroxide catabolic process	-2.27471
Prupe.6G176500	redox.heme	oxidation-reduction process, oxidoreductase activity, metal ion binding, monooxygenase activity, iron ion binding, oxidoreductase activity, acting on paired donors, with incorporation or reduction of molecular oxygen, heme binding	-7.89566
Prupe.6G192000	redox.heme	oxidation-reduction process, oxidoreductase activity, metal ion binding, extracellular region, heme binding, peroxidase activity, cellular oxidant detoxification, response to oxidative stress, hydrogen peroxide catabolic process	2.75674
Prupe.4G235600	redox.heme	oxidation-reduction process, oxidoreductase activity, metal ion binding, monooxygenase activity, iron ion binding, oxidoreductase activity, acting on paired donors, with incorporation or reduction of molecular oxygen, heme binding	-6.92964
Prupe.8G177300	redox.heme	oxidation-reduction process, oxidoreductase activity, membrane, integral component of membrane, metal ion binding, monooxygenase activity, iron ion binding, oxidoreductase activity, acting on paired donors, with incorporation or reduction of molecular oxygen, heme binding, multicellular organism development, sterol metabolic process, brassinosteroid homeostasis, brassinosteroid biosynthetic proce…	-2.33148
Prupe.1G292000	redox.heme	oxidation-reduction process, oxidoreductase activity, metal ion binding, monooxygenase activity, iron ion binding, oxidoreductase activity, acting on paired donors, with incorporation or reduction of molecular oxygen, heme binding	-5.79997
Prupe.1G538200	redox.heme	oxidation-reduction process, oxidoreductase activity, membrane, integral component of membrane, metal ion binding, monooxygenase activity, iron ion binding, oxidoreductase activity, acting on paired donors, with incorporation or reduction of molecular oxygen, heme binding, defense response to other organism	-2.92029
Prupe.6G227400	redox.heme	oxidation-reduction process, oxidoreductase activity, membrane, integral component of membrane, metal ion binding, monooxygenase activity, iron ion binding, oxidoreductase activity, acting on paired donors, with incorporation or reduction of molecular oxygen, heme binding, oxidoreductase activity, acting on paired donors, with incorporation or reduction of molecular oxygen, NAD(P)H as one donor, …	-4.81182
Prupe.7G197900	redox.heme	oxidation-reduction process, oxidoreductase activity, metal ion binding, monooxygenase activity, iron ion binding, oxidoreductase activity, acting on paired donors, with incorporation or reduction of molecular oxygen, heme binding	-7.13672
Prupe.8G026100	redox.heme	oxidation-reduction process, oxidoreductase activity, metal ion binding, monooxygenase activity, iron ion binding, oxidoreductase activity, acting on paired donors, with incorporation or reduction of molecular oxygen, heme binding, multicellular organism development, sterol metabolic process, brassinosteroid homeostasis, brassinosteroid biosynthetic process	5.63711
Prupe.4G152800	redox.heme	oxidation-reduction process, oxidoreductase activity, membrane, integral component of membrane, metal ion binding, monooxygenase activity, iron ion binding, oxidoreductase activity, acting on paired donors, with incorporation or reduction of molecular oxygen, heme binding	-3.62211
Prupe.6G013500	redox.heme	oxidation-reduction process, oxidoreductase activity, metal ion binding, extracellular region, heme binding, peroxidase activity, cellular oxidant detoxification, response to oxidative stress, hydrogen peroxide catabolic process	3.19021
Prupe.5G078100	redox.heme	oxidation-reduction process, oxidoreductase activity, membrane, integral component of membrane, metal ion binding, monooxygenase activity, iron ion binding, oxidoreductase activity, acting on paired donors, with incorporation or reduction of molecular oxygen, heme binding	2.80114
Prupe.1G203800	redox.heme	oxidation-reduction process, oxidoreductase activity, membrane, integral component of membrane, metal ion binding, photosynthesis, chloroplast, plastid, electron transfer activity, chloroplast thylakoid membrane, thylakoid, electron transporter, transferring electrons within cytochrome b6/f complex of photosystem II activity, respiratory electron transport chain, heme binding, iron ion binding	-2.14153
Prupe.5G078600	redox.heme	oxidation-reduction process, oxidoreductase activity, metal ion binding, monooxygenase activity, iron ion binding, oxidoreductase activity, acting on paired donors, with incorporation or reduction of molecular oxygen, heme binding	-6.62661
Prupe.1G292500	redox.heme	oxidation-reduction process, oxidoreductase activity, membrane, integral component of membrane, metal ion binding, monooxygenase activity, iron ion binding, oxidoreductase activity, acting on paired donors, with incorporation or reduction of molecular oxygen, heme binding	2.71658
Prupe.2G171800	redox.heme	oxidation-reduction process, oxidoreductase activity, membrane, integral component of membrane, metal ion binding, monooxygenase activity, iron ion binding, oxidoreductase activity, acting on paired donors, with incorporation or reduction of molecular oxygen, heme binding, alkane 1-monooxygenase activity, fatty acid metabolic process	-3.96473
Prupe.6G041300	redox.heme	oxidation-reduction process, oxidoreductase activity, metal ion binding, monooxygenase activity, iron ion binding, oxidoreductase activity, acting on paired donors, with incorporation or reduction of molecular oxygen, heme binding, membrane, integral component of membrane, sterol metabolic process	-4.53948
Prupe.7G171100	redox.heme	oxidation-reduction process, oxidoreductase activity, metal ion binding, heme binding, peroxidase activity, cellular oxidant detoxification, response to oxidative stress, response to reactive oxygen species, chloroplast, cellular response to oxidative stress, hydrogen peroxide catabolic process, L-ascorbate peroxidase activity	-2.029
Prupe.2G086300	redox.heme	oxidation-reduction process, oxidoreductase activity, membrane, integral component of membrane, metal ion binding, monooxygenase activity, iron ion binding, oxidoreductase activity, acting on paired donors, with incorporation or reduction of molecular oxygen, heme binding, oxidoreductase activity, acting on paired donors, with incorporation or reduction of molecular oxygen, NAD(P)H as one donor, …	-2.19477
Prupe.4G276800	redox.heme	oxidation-reduction process, oxidoreductase activity, metal ion binding, extracellular region, heme binding, peroxidase activity, cellular oxidant detoxification, response to oxidative stress, hydrogen peroxide catabolic process, plasmodesma, plant-type cell wall	-3.63136
Prupe.6G298700	redox.heme	oxidation-reduction process, oxidoreductase activity, membrane, integral component of membrane, metal ion binding, monooxygenase activity, iron ion binding, oxidoreductase activity, acting on paired donors, with incorporation or reduction of molecular oxygen, heme binding	2.99827
Prupe.8G110100	redox.heme	oxidation-reduction process, iron ion binding, oxidoreductase activity, acting on paired donors, with incorporation or reduction of molecular oxygen, heme binding, monooxygenase activity, oxidoreductase activity, sterol metabolic process	5.7941
Prupe.6G013200	redox.heme	oxidation-reduction process, oxidoreductase activity, metal ion binding, extracellular region, heme binding, peroxidase activity, cellular oxidant detoxification, response to oxidative stress, hydrogen peroxide catabolic process	-5.06805
Prupe.5G077800	redox.heme	oxidation-reduction process, oxidoreductase activity, membrane, integral component of membrane, metal ion binding, monooxygenase activity, iron ion binding, oxidoreductase activity, acting on paired donors, with incorporation or reduction of molecular oxygen, heme binding	-4.45039
Prupe.6G007200	redox.heme	oxidation-reduction process, oxidoreductase activity, metal ion binding, monooxygenase activity, iron ion binding, oxidoreductase activity, acting on paired donors, with incorporation or reduction of molecular oxygen, heme binding, membrane, oxidoreductase activity, acting on paired donors, with incorporation or reduction of molecular oxygen, NAD(P)H as one donor, and incorporation of one atom of…	-5.848
Prupe.6G038200	redox.heme	oxidation-reduction process, oxidoreductase activity, membrane, integral component of membrane, metal ion binding, monooxygenase activity, iron ion binding, oxidoreductase activity, acting on paired donors, with incorporation or reduction of molecular oxygen, heme binding	-2.6497
Prupe.1G064900	redox.heme	oxidation-reduction process, oxidoreductase activity, membrane, integral component of membrane, metal ion binding, monooxygenase activity, iron ion binding, oxidoreductase activity, acting on paired donors, with incorporation or reduction of molecular oxygen, heme binding	-2.05416
Prupe.6G018300	redox.heme	oxidation-reduction process, membrane, integral component of membrane, heme binding, cellular oxidant detoxification, catalase activity	-2.36258
Prupe.7G173700	redox.heme	oxidation-reduction process, oxidoreductase activity, metal ion binding, extracellular region, heme binding, peroxidase activity, cellular oxidant detoxification, response to oxidative stress, hydrogen peroxide catabolic process, plasmodesma, plant-type cell wall	-4.26341

## Sheet: CNR_CRR
Heme					Glutathione					Ascorbate					Catalase
Gene_id	Pathway	description	logFC		Gene_id	Pathway	description	logFC		Gene_id	Pathway	description	logFC		Gene_id	Pathway	description	logFC
Prupe.4G238200	redox.heme	oxidation-reduction process, oxidoreductase activity, metal ion binding, monooxygenase activity, iron ion binding, oxidoreductase activity, acting on paired donors, with incorporation or reduction of molecular oxygen, heme binding	-9.32611		Prupe.4G146200	redox.Glutathione	glutathione metabolic process, cytoplasm, glutathione transferase activity, protein binding	-4.56562		Prupe.2G320000	redox-Ascorbate	oxidation-reduction process, oxidoreductase activity, metal ion binding, heme binding, peroxidase activity, cellular oxidant detoxification, response to oxidative stress, hydrogen peroxide catabolic process, plasmodesma, plant-type cell wall, L-ascorbate peroxidase activity	-3.55644
Prupe.4G199800	redox.heme	oxidation-reduction process, membrane, integral component of membrane, iron ion binding, oxidoreductase activity, acting on paired donors, with incorporation or reduction of molecular oxygen, heme binding	-7.57535		Prupe.4G146000	redox.Glutathione	glutathione metabolic process, cytoplasm, glutathione transferase activity, protein binding	-4.6978		Prupe.6G242200	redox-Ascorbate	oxidation-reduction process, oxidoreductase activity, metal ion binding, heme binding, peroxidase activity, cellular oxidant detoxification, response to oxidative stress, response to reactive oxygen species, chloroplast, cellular response to oxidative stress, hydrogen peroxide catabolic process, L-ascorbate peroxidase activity, cytosol	-2.37322
Prupe.6G044700	redox.heme	oxidation-reduction process, oxidoreductase activity, metal ion binding, extracellular region, heme binding, peroxidase activity, cellular oxidant detoxification, response to oxidative stress, hydrogen peroxide catabolic process	2.85294		Prupe.8G018400	redox.Glutathione	oxidation-reduction process, oxidoreductase activity, metal ion binding, zinc ion binding, cytosol, alcohol dehydrogenase activity, zinc-dependent, S-(hydroxymethyl)glutathione dehydrogenase activity, formaldehyde catabolic process	-8.33287
Prupe.8G008100	redox.heme	oxidation-reduction process, oxidoreductase activity, membrane, integral component of membrane, metal ion binding, monooxygenase activity, iron ion binding, oxidoreductase activity, acting on paired donors, with incorporation or reduction of molecular oxygen, heme binding	2.14639		Prupe.8G210400	redox.Glutathione	glutathione metabolic process, cytoplasm, glutathione transferase activity, protein binding	-2.4659
Prupe.4G153000	redox.heme	oxidation-reduction process, oxidoreductase activity, membrane, integral component of membrane, metal ion binding, monooxygenase activity, iron ion binding, oxidoreductase activity, acting on paired donors, with incorporation or reduction of molecular oxygen, heme binding	-3.30437		Prupe.8G207300	redox.Glutathione	oxidation-reduction process, cytosol, zinc ion binding, alcohol dehydrogenase activity, zinc-dependent, S-(hydroxymethyl)glutathione dehydrogenase activity, formaldehyde catabolic process	-3.34522
Prupe.1G387500	redox.heme	oxidation-reduction process, oxidoreductase activity, membrane, integral component of membrane, metal ion binding, monooxygenase activity, iron ion binding, oxidoreductase activity, acting on paired donors, with incorporation or reduction of molecular oxygen, heme binding, defense response to other organism	2.79961
Prupe.1G428700	redox.heme	oxidation-reduction process, oxidoreductase activity, metal ion binding, monooxygenase activity, iron ion binding, oxidoreductase activity, acting on paired donors, with incorporation or reduction of molecular oxygen, heme binding, membrane, oxidoreductase activity, acting on paired donors, with incorporation or reduction of molecular oxygen, NAD(P)H as one donor, and incorporation of one atom of…	3.27609
Prupe.6G044800	redox.heme	oxidation-reduction process, oxidoreductase activity, membrane, integral component of membrane, metal ion binding, extracellular region, heme binding, peroxidase activity, cellular oxidant detoxification, response to oxidative stress, hydrogen peroxide catabolic process	7.96264
Prupe.5G078300	redox.heme	oxidation-reduction process, oxidoreductase activity, membrane, integral component of membrane, metal ion binding, monooxygenase activity, iron ion binding, oxidoreductase activity, acting on paired donors, with incorporation or reduction of molecular oxygen, heme binding	-6.08815
Prupe.5G078100	redox.heme	oxidation-reduction process, oxidoreductase activity, membrane, integral component of membrane, metal ion binding, monooxygenase activity, iron ion binding, oxidoreductase activity, acting on paired donors, with incorporation or reduction of molecular oxygen, heme binding	-7.71958
Prupe.1G428400	redox.heme	oxidation-reduction process, iron ion binding, oxidoreductase activity, acting on paired donors, with incorporation or reduction of molecular oxygen, heme binding, membrane, oxidoreductase activity, acting on paired donors, with incorporation or reduction of molecular oxygen, NAD(P)H as one donor, and incorporation of one atom of oxygen	-6.99358
Prupe.1G291100	redox.heme	oxidation-reduction process, oxidoreductase activity, membrane, integral component of membrane, metal ion binding, monooxygenase activity, iron ion binding, oxidoreductase activity, acting on paired donors, with incorporation or reduction of molecular oxygen, heme binding	-2.08865
Prupe.8G258500	redox.heme	membrane, integral component of membrane, heme binding, porphyrin-containing compound metabolic process, response to osmotic stress, response to salt stress, response to abscisic acid, endoplasmic reticulum, Golgi apparatus, Golgi stack	-3.71585
Prupe.5G078400	redox.heme	oxidation-reduction process, oxidoreductase activity, membrane, integral component of membrane, metal ion binding, monooxygenase activity, iron ion binding, oxidoreductase activity, acting on paired donors, with incorporation or reduction of molecular oxygen, heme binding	-8.03992
Prupe.6G007200	redox.heme	oxidation-reduction process, oxidoreductase activity, metal ion binding, monooxygenase activity, iron ion binding, oxidoreductase activity, acting on paired donors, with incorporation or reduction of molecular oxygen, heme binding, membrane, oxidoreductase activity, acting on paired donors, with incorporation or reduction of molecular oxygen, NAD(P)H as one donor, and incorporation of one atom of…	-7.40075
Prupe.2G320000	redox.heme	oxidation-reduction process, oxidoreductase activity, metal ion binding, heme binding, peroxidase activity, cellular oxidant detoxification, response to oxidative stress, hydrogen peroxide catabolic process, plasmodesma, plant-type cell wall, L-ascorbate peroxidase activity	-3.55644
Prupe.6G038000	redox.heme	oxidation-reduction process, iron ion binding, oxidoreductase activity, acting on paired donors, with incorporation or reduction of molecular oxygen, heme binding, monooxygenase activity	7.82035
Prupe.1G387200	redox.heme	oxidation-reduction process, oxidoreductase activity, metal ion binding, monooxygenase activity, iron ion binding, oxidoreductase activity, acting on paired donors, with incorporation or reduction of molecular oxygen, heme binding, defense response to other organism	-5.69435
Prupe.1G538000	redox.heme	oxidation-reduction process, oxidoreductase activity, metal ion binding, monooxygenase activity, iron ion binding, oxidoreductase activity, acting on paired donors, with incorporation or reduction of molecular oxygen, heme binding, defense response to other organism	-8.29044
Prupe.7G119800	redox.heme	oxidation-reduction process, oxidoreductase activity, membrane, integral component of membrane, metal ion binding, monooxygenase activity, iron ion binding, oxidoreductase activity, acting on paired donors, with incorporation or reduction of molecular oxygen, heme binding	7.38329
Prupe.1G231000	redox.heme	oxidation-reduction process, oxidoreductase activity, metal ion binding, monooxygenase activity, iron ion binding, oxidoreductase activity, acting on paired donors, with incorporation or reduction of molecular oxygen, heme binding	-5.93508
Prupe.1G386900	redox.heme	oxidation-reduction process, oxidoreductase activity, membrane, integral component of membrane, metal ion binding, monooxygenase activity, iron ion binding, oxidoreductase activity, acting on paired donors, with incorporation or reduction of molecular oxygen, heme binding, defense response to other organism	-7.08654
Prupe.7G198000	redox.heme	oxidation-reduction process, oxidoreductase activity, metal ion binding, monooxygenase activity, iron ion binding, oxidoreductase activity, acting on paired donors, with incorporation or reduction of molecular oxygen, heme binding	-6.97777
Prupe.4G238300	redox.heme	oxidation-reduction process, membrane, integral component of membrane, iron ion binding, oxidoreductase activity, acting on paired donors, with incorporation or reduction of molecular oxygen, heme binding	-2.05259
Prupe.1G230200	redox.heme	oxidation-reduction process, oxidoreductase activity, metal ion binding, monooxygenase activity, iron ion binding, oxidoreductase activity, acting on paired donors, with incorporation or reduction of molecular oxygen, heme binding	2.0305
Prupe.4G276800	redox.heme	oxidation-reduction process, oxidoreductase activity, metal ion binding, extracellular region, heme binding, peroxidase activity, cellular oxidant detoxification, response to oxidative stress, hydrogen peroxide catabolic process, plasmodesma, plant-type cell wall	-5.54951
Prupe.4G235600	redox.heme	oxidation-reduction process, oxidoreductase activity, metal ion binding, monooxygenase activity, iron ion binding, oxidoreductase activity, acting on paired donors, with incorporation or reduction of molecular oxygen, heme binding	-6.09904
Prupe.2G148400	redox.heme	oxidation-reduction process, oxidoreductase activity, membrane, integral component of membrane, metal ion binding, monooxygenase activity, iron ion binding, oxidoreductase activity, acting on paired donors, with incorporation or reduction of molecular oxygen, heme binding	2.88401
Prupe.1G230900	redox.heme	oxidation-reduction process, oxidoreductase activity, membrane, integral component of membrane, metal ion binding, monooxygenase activity, iron ion binding, oxidoreductase activity, acting on paired donors, with incorporation or reduction of molecular oxygen, heme binding	-3.6604
Prupe.1G534600	redox.heme	oxidation-reduction process, oxidoreductase activity, membrane, integral component of membrane, metal ion binding, monooxygenase activity, iron ion binding, oxidoreductase activity, acting on paired donors, with incorporation or reduction of molecular oxygen, heme binding	5.80057
Prupe.1G242300	redox.heme	oxidation-reduction process, oxidoreductase activity, membrane, integral component of membrane, metal ion binding, monooxygenase activity, iron ion binding, oxidoreductase activity, acting on paired donors, with incorporation or reduction of molecular oxygen, heme binding	2.1767
Prupe.6G242200	redox.heme	oxidation-reduction process, oxidoreductase activity, metal ion binding, heme binding, peroxidase activity, cellular oxidant detoxification, response to oxidative stress, response to reactive oxygen species, chloroplast, cellular response to oxidative stress, hydrogen peroxide catabolic process, L-ascorbate peroxidase activity, cytosol	-2.37322
Prupe.6G013400	redox.heme	oxidation-reduction process, oxidoreductase activity, metal ion binding, extracellular region, heme binding, peroxidase activity, cellular oxidant detoxification, response to oxidative stress, hydrogen peroxide catabolic process	2.91458
Prupe.6G013500	redox.heme	oxidation-reduction process, oxidoreductase activity, metal ion binding, extracellular region, heme binding, peroxidase activity, cellular oxidant detoxification, response to oxidative stress, hydrogen peroxide catabolic process	3.47082
Prupe.6G038100	redox.heme	oxidation-reduction process, oxidoreductase activity, metal ion binding, monooxygenase activity, iron ion binding, oxidoreductase activity, acting on paired donors, with incorporation or reduction of molecular oxygen, heme binding	-2.85728
Prupe.6G212300	redox.heme	oxidation-reduction process, oxidoreductase activity, membrane, integral component of membrane, metal ion binding, monooxygenase activity, iron ion binding, oxidoreductase activity, acting on paired donors, with incorporation or reduction of molecular oxygen, heme binding, defense response to other organism	2.17294
Prupe.5G077700	redox.heme	oxidation-reduction process, membrane, integral component of membrane, iron ion binding, oxidoreductase activity, acting on paired donors, with incorporation or reduction of molecular oxygen, heme binding	-4.62212
Prupe.5G078800	redox.heme	oxidation-reduction process, oxidoreductase activity, membrane, integral component of membrane, metal ion binding, monooxygenase activity, iron ion binding, oxidoreductase activity, acting on paired donors, with incorporation or reduction of molecular oxygen, heme binding	-4.68941
Prupe.8G116400	redox.heme	oxidation-reduction process, oxidoreductase activity, metal ion binding, extracellular region, heme binding, peroxidase activity, cellular oxidant detoxification, response to oxidative stress, hydrogen peroxide catabolic process	3.1181
Prupe.1G231300	redox.heme	oxidation-reduction process, oxidoreductase activity, metal ion binding, monooxygenase activity, iron ion binding, oxidoreductase activity, acting on paired donors, with incorporation or reduction of molecular oxygen, heme binding	2.35083
Prupe.3G237800	redox.heme	oxidation-reduction process, iron ion binding, oxidoreductase activity, acting on paired donors, with incorporation or reduction of molecular oxygen, heme binding, monooxygenase activity	2.02123
Prupe.6G046500	redox.heme	oxidation-reduction process, iron ion binding, oxidoreductase activity, acting on paired donors, with incorporation or reduction of molecular oxygen, heme binding, membrane, oxidoreductase activity, acting on paired donors, with incorporation or reduction of molecular oxygen, NAD(P)H as one donor, and incorporation of one atom of oxygen	-2.08284
Prupe.8G107300	redox.heme	metal ion binding, heme binding, oxygen carrier activity, oxygen binding, oxygen transport	2.2408
Prupe.5G230200	redox.heme	oxidoreductase activity, oxidation-reduction process, heme binding, peroxidase activity, cellular oxidant detoxification, response to oxidative stress	-2.72648
Prupe.1G410000	redox.heme	oxidation-reduction process, oxidoreductase activity, membrane, integral component of membrane, metal ion binding, monooxygenase activity, iron ion binding, oxidoreductase activity, acting on paired donors, with incorporation or reduction of molecular oxygen, heme binding	-2.47163

## Sheet: TNR_TRR
Heme					Glutathione					Ascorbate					Catalase
Gene_id	Pathway	description	logFC		Gene_id	Pathway	description	logFC		Gene_id	Pathway	description	logFC		Gene_id	Pathway	description	logFC
Prupe.4G238200	redox.heme	oxidation-reduction process, oxidoreductase activity, metal ion binding, monooxygenase activity, iron ion binding, oxidoreductase activity, acting on paired donors, with incorporation or reduction of molecular oxygen, heme binding	-9.36813		Prupe.4G147200	redox.Glutathione	glutathione metabolic process, cytoplasm, glutathione transferase activity, protein binding	3.06883		Prupe.6G242200	redox.Ascorbate	oxidation-reduction process, oxidoreductase activity, metal ion binding, heme binding, peroxidase activity, cellular oxidant detoxification, response to oxidative stress, response to reactive oxygen species, chloroplast, cellular response to oxidative stress, hydrogen peroxide catabolic process, L-ascorbate peroxidase activity, cytosol	-4.36655		Prupe.6G018300	redox.Catalase	oxidation-reduction process, membrane, integral component of membrane, heme binding, cellular oxidant detoxification, catalase activity	3.71115
Prupe.6G044700	redox.heme	oxidation-reduction process, oxidoreductase activity, metal ion binding, extracellular region, heme binding, peroxidase activity, cellular oxidant detoxification, response to oxidative stress, hydrogen peroxide catabolic process	3.06108		Prupe.4G147100	redox.Glutathione	glutathione metabolic process, cytoplasm, glutathione transferase activity, protein binding	5.13752		Prupe.2G320000	redox.Ascorbate	oxidation-reduction process, oxidoreductase activity, metal ion binding, heme binding, peroxidase activity, cellular oxidant detoxification, response to oxidative stress, hydrogen peroxide catabolic process, plasmodesma, plant-type cell wall, L-ascorbate peroxidase activity	-3.57299
Prupe.4G199800	redox.heme	oxidation-reduction process, membrane, integral component of membrane, iron ion binding, oxidoreductase activity, acting on paired donors, with incorporation or reduction of molecular oxygen, heme binding	-9.58264		Prupe.8G018600	redox.Glutathione	oxidation-reduction process, oxidoreductase activity, metal ion binding, zinc ion binding, cytosol, alcohol dehydrogenase activity, zinc-dependent, S-(hydroxymethyl)glutathione dehydrogenase activity, formaldehyde catabolic process	-5.30694
Prupe.4G153000	redox.heme	oxidation-reduction process, oxidoreductase activity, membrane, integral component of membrane, metal ion binding, monooxygenase activity, iron ion binding, oxidoreductase activity, acting on paired donors, with incorporation or reduction of molecular oxygen, heme binding	-3.66144		Prupe.1G055000	redox.Glutathione	glutathione metabolic process, cytoplasm, glutathione transferase activity, protein binding	4.30292
Prupe.6G242200	redox.heme	oxidation-reduction process, oxidoreductase activity, metal ion binding, heme binding, peroxidase activity, cellular oxidant detoxification, response to oxidative stress, response to reactive oxygen species, chloroplast, cellular response to oxidative stress, hydrogen peroxide catabolic process, L-ascorbate peroxidase activity, cytosol	-4.36655		Prupe.1G054900	redox.Glutathione	glutathione metabolic process, cytoplasm, glutathione transferase activity, protein binding	2.62983
Prupe.6G044800	redox.heme	oxidation-reduction process, oxidoreductase activity, membrane, integral component of membrane, metal ion binding, extracellular region, heme binding, peroxidase activity, cellular oxidant detoxification, response to oxidative stress, hydrogen peroxide catabolic process	9.94945		Prupe.1G526000	redox.Glutathione	glutathione metabolic process, cytoplasm, glutathione transferase activity, protein binding	2.1662
Prupe.1G291100	redox.heme	oxidation-reduction process, oxidoreductase activity, membrane, integral component of membrane, metal ion binding, monooxygenase activity, iron ion binding, oxidoreductase activity, acting on paired donors, with incorporation or reduction of molecular oxygen, heme binding	-2.78685		Prupe.4G146200	redox.Glutathione	glutathione metabolic process, cytoplasm, glutathione transferase activity, protein binding	-3.21405
Prupe.1G428700	redox.heme	oxidation-reduction process, oxidoreductase activity, metal ion binding, monooxygenase activity, iron ion binding, oxidoreductase activity, acting on paired donors, with incorporation or reduction of molecular oxygen, heme binding, membrane, oxidoreductase activity, acting on paired donors, with incorporation or reduction of molecular oxygen, NAD(P)H as one donor, and incorporation of one atom of…	3.0458		Prupe.8G210400	redox.Glutathione	glutathione metabolic process, cytoplasm, glutathione transferase activity, protein binding	3.48936
Prupe.6G223400	redox.heme	oxidation-reduction process, oxidoreductase activity, metal ion binding, extracellular region, heme binding, peroxidase activity, cellular oxidant detoxification, response to oxidative stress, hydrogen peroxide catabolic process	2.06326		Prupe.6G040700	redox.Glutathione	glutathione metabolic process, cytoplasm, glutathione transferase activity, protein binding	3.18315
Prupe.1G230500	redox.heme	oxidation-reduction process, oxidoreductase activity, metal ion binding, monooxygenase activity, iron ion binding, oxidoreductase activity, acting on paired donors, with incorporation or reduction of molecular oxygen, heme binding	-6.64013		Prupe.1G456300	redox.Glutathione	glutathione catabolic process, gamma-glutamylcyclotransferase activity, cytoplasm	2.56375
Prupe.5G078300	redox.heme	oxidation-reduction process, oxidoreductase activity, membrane, integral component of membrane, metal ion binding, monooxygenase activity, iron ion binding, oxidoreductase activity, acting on paired donors, with incorporation or reduction of molecular oxygen, heme binding	-3.8765		Prupe.8G210300	redox.Glutathione	glutathione metabolic process, cytoplasm, glutathione transferase activity, protein binding	3.05858
Prupe.1G428400	redox.heme	oxidation-reduction process, iron ion binding, oxidoreductase activity, acting on paired donors, with incorporation or reduction of molecular oxygen, heme binding, membrane, oxidoreductase activity, acting on paired donors, with incorporation or reduction of molecular oxygen, NAD(P)H as one donor, and incorporation of one atom of oxygen	-5.71788		Prupe.4G146800	redox.Glutathione	glutathione metabolic process, cytoplasm, glutathione transferase activity, protein binding	3.53281
Prupe.1G534600	redox.heme	oxidation-reduction process, oxidoreductase activity, membrane, integral component of membrane, metal ion binding, monooxygenase activity, iron ion binding, oxidoreductase activity, acting on paired donors, with incorporation or reduction of molecular oxygen, heme binding	8.32036		Prupe.4G146400	redox.Glutathione	glutathione metabolic process, cytoplasm, glutathione transferase activity, protein binding	-4.04524
Prupe.1G387500	redox.heme	oxidation-reduction process, oxidoreductase activity, membrane, integral component of membrane, metal ion binding, monooxygenase activity, iron ion binding, oxidoreductase activity, acting on paired donors, with incorporation or reduction of molecular oxygen, heme binding, defense response to other organism	2.01626		Prupe.4G146000	redox.Glutathione	glutathione metabolic process, cytoplasm, glutathione transferase activity, protein binding	-2.57949
Prupe.2G320000	redox.heme	oxidation-reduction process, oxidoreductase activity, metal ion binding, heme binding, peroxidase activity, cellular oxidant detoxification, response to oxidative stress, hydrogen peroxide catabolic process, plasmodesma, plant-type cell wall, L-ascorbate peroxidase activity	-3.57299		Prupe.4G147300	redox.Glutathione	glutathione metabolic process, cytoplasm, glutathione transferase activity, protein binding	2.90855
Prupe.1G580300	redox.heme	oxidation-reduction process, oxidoreductase activity, metal ion binding, monooxygenase activity, iron ion binding, oxidoreductase activity, acting on paired donors, with incorporation or reduction of molecular oxygen, heme binding, membrane, oxidoreductase activity, acting on paired donors, with incorporation or reduction of molecular oxygen, NAD(P)H as one donor, and incorporation of one atom of…	2.22151		Prupe.8G207300	redox.Glutathione	oxidation-reduction process, cytosol, zinc ion binding, alcohol dehydrogenase activity, zinc-dependent, S-(hydroxymethyl)glutathione dehydrogenase activity, formaldehyde catabolic process	-3.52504
Prupe.6G018300	redox.heme	oxidation-reduction process, membrane, integral component of membrane, heme binding, cellular oxidant detoxification, catalase activity	3.71115		Prupe.4G147000	redox.Glutathione	glutathione metabolic process, cytoplasm, glutathione transferase activity, protein binding	3.26977
Prupe.1G230200	redox.heme	oxidation-reduction process, oxidoreductase activity, metal ion binding, monooxygenase activity, iron ion binding, oxidoreductase activity, acting on paired donors, with incorporation or reduction of molecular oxygen, heme binding	2.20196		Prupe.4G146100	redox.Glutathione	glutathione metabolic process, cytoplasm, glutathione transferase activity, protein binding	-2.3026
Prupe.1G538000	redox.heme	oxidation-reduction process, oxidoreductase activity, metal ion binding, monooxygenase activity, iron ion binding, oxidoreductase activity, acting on paired donors, with incorporation or reduction of molecular oxygen, heme binding, defense response to other organism	-8.35504		Prupe.5G099600	redox.Glutathione	catalytic activity, nucleotide binding, ATP binding, ligase activity, chloroplast, plastid, glutathione biosynthetic process, glutamate-cysteine ligase activity, cellular modified amino acid biosynthetic process	-5.08046
Prupe.5G078100	redox.heme	oxidation-reduction process, oxidoreductase activity, membrane, integral component of membrane, metal ion binding, monooxygenase activity, iron ion binding, oxidoreductase activity, acting on paired donors, with incorporation or reduction of molecular oxygen, heme binding	-4.64591		Prupe.8G018400	redox.Glutathione	oxidation-reduction process, oxidoreductase activity, metal ion binding, zinc ion binding, cytosol, alcohol dehydrogenase activity, zinc-dependent, S-(hydroxymethyl)glutathione dehydrogenase activity, formaldehyde catabolic process	-3.11668
Prupe.2G284800	redox.heme	oxidation-reduction process, iron ion binding, oxidoreductase activity, acting on paired donors, with incorporation or reduction of molecular oxygen, heme binding	2.24409		Prupe.8G210500	redox.Glutathione	glutathione metabolic process, cytoplasm, glutathione transferase activity, protein binding	2.1724
Prupe.6G038000	redox.heme	oxidation-reduction process, iron ion binding, oxidoreductase activity, acting on paired donors, with incorporation or reduction of molecular oxygen, heme binding, monooxygenase activity	7.49647
Prupe.7G198000	redox.heme	oxidation-reduction process, oxidoreductase activity, metal ion binding, monooxygenase activity, iron ion binding, oxidoreductase activity, acting on paired donors, with incorporation or reduction of molecular oxygen, heme binding	-7.16871
Prupe.6G007200	redox.heme	oxidation-reduction process, oxidoreductase activity, metal ion binding, monooxygenase activity, iron ion binding, oxidoreductase activity, acting on paired donors, with incorporation or reduction of molecular oxygen, heme binding, membrane, oxidoreductase activity, acting on paired donors, with incorporation or reduction of molecular oxygen, NAD(P)H as one donor, and incorporation of one atom of…	-6.19382
Prupe.8G125800	redox.heme	oxidation-reduction process, oxidoreductase activity, membrane, integral component of membrane, metal ion binding, monooxygenase activity, iron ion binding, oxidoreductase activity, acting on paired donors, with incorporation or reduction of molecular oxygen, heme binding, sterol metabolic process, (+)-abscisic acid 8'-hydroxylase activity	-2.55384
Prupe.1G387200	redox.heme	oxidation-reduction process, oxidoreductase activity, metal ion binding, monooxygenase activity, iron ion binding, oxidoreductase activity, acting on paired donors, with incorporation or reduction of molecular oxygen, heme binding, defense response to other organism	-5.28339
Prupe.3G064700	redox.heme	oxidation-reduction process, oxidoreductase activity, membrane, integral component of membrane, metal ion binding, monooxygenase activity, iron ion binding, oxidoreductase activity, acting on paired donors, with incorporation or reduction of molecular oxygen, heme binding, defense response to other organism	5.597
Prupe.7G119800	redox.heme	oxidation-reduction process, oxidoreductase activity, membrane, integral component of membrane, metal ion binding, monooxygenase activity, iron ion binding, oxidoreductase activity, acting on paired donors, with incorporation or reduction of molecular oxygen, heme binding	7.31649
Prupe.5G077700	redox.heme	oxidation-reduction process, membrane, integral component of membrane, iron ion binding, oxidoreductase activity, acting on paired donors, with incorporation or reduction of molecular oxygen, heme binding	-3.59276
Prupe.6G038100	redox.heme	oxidation-reduction process, oxidoreductase activity, metal ion binding, monooxygenase activity, iron ion binding, oxidoreductase activity, acting on paired donors, with incorporation or reduction of molecular oxygen, heme binding	-2.9632
Prupe.8G258500	redox.heme	membrane, integral component of membrane, heme binding, porphyrin-containing compound metabolic process, response to osmotic stress, response to salt stress, response to abscisic acid, endoplasmic reticulum, Golgi apparatus, Golgi stack	-2.83037
Prupe.6G192000	redox.heme	oxidation-reduction process, oxidoreductase activity, metal ion binding, extracellular region, heme binding, peroxidase activity, cellular oxidant detoxification, response to oxidative stress, hydrogen peroxide catabolic process	2.76507
Prupe.7G197900	redox.heme	oxidation-reduction process, oxidoreductase activity, metal ion binding, monooxygenase activity, iron ion binding, oxidoreductase activity, acting on paired donors, with incorporation or reduction of molecular oxygen, heme binding	-6.53087
Prupe.5G078400	redox.heme	oxidation-reduction process, oxidoreductase activity, membrane, integral component of membrane, metal ion binding, monooxygenase activity, iron ion binding, oxidoreductase activity, acting on paired donors, with incorporation or reduction of molecular oxygen, heme binding	-6.12953
Prupe.1G231000	redox.heme	oxidation-reduction process, oxidoreductase activity, metal ion binding, monooxygenase activity, iron ion binding, oxidoreductase activity, acting on paired donors, with incorporation or reduction of molecular oxygen, heme binding	-5.21556
Prupe.6G306500	redox.heme	oxidation-reduction process, oxidoreductase activity, metal ion binding, extracellular region, heme binding, peroxidase activity, cellular oxidant detoxification, response to oxidative stress, hydrogen peroxide catabolic process, plasmodesma, plant-type cell wall	2.29943
Prupe.1G292600	redox.heme	oxidation-reduction process, oxidoreductase activity, metal ion binding, monooxygenase activity, iron ion binding, oxidoreductase activity, acting on paired donors, with incorporation or reduction of molecular oxygen, heme binding	5.33317
Prupe.1G386900	redox.heme	oxidation-reduction process, oxidoreductase activity, membrane, integral component of membrane, metal ion binding, monooxygenase activity, iron ion binding, oxidoreductase activity, acting on paired donors, with incorporation or reduction of molecular oxygen, heme binding, defense response to other organism	-5.76146
Prupe.4G235600	redox.heme	oxidation-reduction process, oxidoreductase activity, metal ion binding, monooxygenase activity, iron ion binding, oxidoreductase activity, acting on paired donors, with incorporation or reduction of molecular oxygen, heme binding	-5.02689
Prupe.8G026100	redox.heme	oxidation-reduction process, oxidoreductase activity, metal ion binding, monooxygenase activity, iron ion binding, oxidoreductase activity, acting on paired donors, with incorporation or reduction of molecular oxygen, heme binding, multicellular organism development, sterol metabolic process, brassinosteroid homeostasis, brassinosteroid biosynthetic process	3.10243
Prupe.6G176500	redox.heme	oxidation-reduction process, oxidoreductase activity, metal ion binding, monooxygenase activity, iron ion binding, oxidoreductase activity, acting on paired donors, with incorporation or reduction of molecular oxygen, heme binding	3.92741
Prupe.6G013500	redox.heme	oxidation-reduction process, oxidoreductase activity, metal ion binding, extracellular region, heme binding, peroxidase activity, cellular oxidant detoxification, response to oxidative stress, hydrogen peroxide catabolic process	2.95063
Prupe.2G260600	redox.heme	oxidation-reduction process, oxidoreductase activity, metal ion binding, extracellular region, heme binding, peroxidase activity, cellular oxidant detoxification, response to oxidative stress, hydrogen peroxide catabolic process	-2.61274
Prupe.4G211000	redox.heme	oxidation-reduction process, oxidoreductase activity, metal ion binding, monooxygenase activity, iron ion binding, oxidoreductase activity, acting on paired donors, with incorporation or reduction of molecular oxygen, heme binding, sterol metabolic process	6.46198
Prupe.2G148400	redox.heme	oxidation-reduction process, oxidoreductase activity, membrane, integral component of membrane, metal ion binding, monooxygenase activity, iron ion binding, oxidoreductase activity, acting on paired donors, with incorporation or reduction of molecular oxygen, heme binding	2.23826
Prupe.6G013200	redox.heme	oxidation-reduction process, oxidoreductase activity, metal ion binding, extracellular region, heme binding, peroxidase activity, cellular oxidant detoxification, response to oxidative stress, hydrogen peroxide catabolic process	-2.6583
Prupe.5G230200	redox.heme	oxidoreductase activity, oxidation-reduction process, heme binding, peroxidase activity, cellular oxidant detoxification, response to oxidative stress	-2.51978
Prupe.1G387000	redox.heme	oxidation-reduction process, oxidoreductase activity, membrane, integral component of membrane, metal ion binding, monooxygenase activity, iron ion binding, oxidoreductase activity, acting on paired donors, with incorporation or reduction of molecular oxygen, heme binding, defense response to other organism	2.49919
Prupe.5G163200	redox.heme	oxidation-reduction process, oxidoreductase activity, membrane, integral component of membrane, metal ion binding, monooxygenase activity, iron ion binding, oxidoreductase activity, acting on paired donors, with incorporation or reduction of molecular oxygen, heme binding	2.39781
Prupe.1G114700	redox.heme	oxidation-reduction process, oxidoreductase activity, metal ion binding, extracellular region, heme binding, peroxidase activity, cellular oxidant detoxification, response to oxidative stress, hydrogen peroxide catabolic process	-4.07069
Prupe.4G276800	redox.heme	oxidation-reduction process, oxidoreductase activity, metal ion binding, extracellular region, heme binding, peroxidase activity, cellular oxidant detoxification, response to oxidative stress, hydrogen peroxide catabolic process, plasmodesma, plant-type cell wall	-3.24617
Prupe.1G410000	redox.heme	oxidation-reduction process, oxidoreductase activity, membrane, integral component of membrane, metal ion binding, monooxygenase activity, iron ion binding, oxidoreductase activity, acting on paired donors, with incorporation or reduction of molecular oxygen, heme binding	-2.45657
